# Supplementary material for: Unusual Square Pyramidal Chalcogenide Mo5 Cluster with Bridging Pyrazolate-Ligands
Source: MDPI journal article supplement (doi:10.3390/ijms24043440), 2023-02-08

## checkCIF/PLATON report

Structure factors have been supplied for datablock(s) jul081\_3

THIS REPORT IS FOR GUIDANCE ONLY. IF USED AS PART OF A REVIEW PROCEDURE FOR PUBLICATION, IT SHOULD NOT REPLACE THE EXPERTISE OF AN EXPERIENCED CRYSTALLOGRAPHIC REFEREE.

No syntax errors found.      CIF dictionary      Interpreting this report

### Datablock: jul081\_3

---

|                 |                                              |                                       |
|-----------------|----------------------------------------------|---------------------------------------|
| Bond precision: | C-C = 0.0038 A                               | Wavelength=0.71073                    |
| Cell:           | a=15.6443 (4)                                | b=15.6443 (4)      c=11.3058 (2)      |
|                 | alpha=90                                     | beta=90      gamma=90                 |
| Temperature:    | 150 K                                        |                                       |
|                 | Calculated                                   | Reported                              |
| Volume          | 2767.03 (15)                                 | 2767.03 (15)                          |
| Space group     | P 4/n                                        | P 4/n                                 |
| Hall group      | -P 4a                                        | -P 4a                                 |
| Moiety formula  | C25 H28 Mo5 N18 Se5, 4 (C3 H4 N2), Br, 2 (C) | C27 H32 Mo5 N18 Se5, 4 (C3 H4 N2), Br |
| Sum formula     | C39 H44 Br Mo5 N26 Se5                       | C39 H48 Br Mo5 N26 Se5                |
| Mr              | 1831.40                                      | 1835.44                               |
| Dx, g cm-3      | 2.198                                        | 2.203                                 |
| Z               | 2                                            | 2                                     |
| Mu (mm-1)       | 5.171                                        | 5.171                                 |
| F000            | 1750.0                                       | 1758.0                                |
| F000'           | 1731.66                                      |                                       |
| h,k,lmax        | 20,20,15                                     | 20,20,15                              |
| Nref            | 3442                                         | 3441                                  |
| Tmin,Tmax       | 0.410,0.538                                  | 0.574,0.746                           |
| Tmin'           | 0.308                                        |                                       |

Correction method= # Reported T Limits: Tmin=0.574 Tmax=0.746  
AbsCorr = MULTI-SCAN

Data completeness= 1.000      Theta(max)= 28.298

|                                |                                  |
|--------------------------------|----------------------------------|
| R(reflections)= 0.0197 ( 3142) | wR2(reflections)= 0.0506 ( 3441) |
| S = 1.053                      | Npar= 183                        |

---

The following ALERTS were generated. Each ALERT has the format

**test-name\_ALERT\_alert-type\_alert-level.**

Click on the hyperlinks for more details of the test.

---

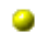

### Alert level C

|                   |                                                  |                  |              |
|-------------------|--------------------------------------------------|------------------|--------------|
| PLAT041_ALERT_1_C | Calc. and Reported SumFormula                    | Strings Differ   | Please Check |
| PLAT042_ALERT_1_C | Calc. and Reported MoietyFormula                 | Strings Differ   | Please Check |
| PLAT043_ALERT_1_C | Calculated and Reported Mol. Weight              | Differ by ..     | 4.04 Check   |
| PLAT068_ALERT_1_C | Reported F000 Differs from Calcd (or Missing)... |                  | Please Check |
| PLAT972_ALERT_2_C | Check Calcd Resid. Dens.                         | 0.70Ang From Br1 | -1.61 eA-3   |

---

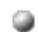

### Alert level G

FORMU01\_ALERT\_2\_G There is a discrepancy between the atom counts in the  
\_chemical\_formula\_sum and the formula from the \_atom\_site\* data.  
Atom count from \_chemical\_formula\_sum: C39 H48 Br1 Mo5 N26 Se5  
Atom count from the \_atom\_site data: C39 H44 Br1 Mo5 N26 Se5

CELLZ01\_ALERT\_1\_G Difference between formula and atom\_site contents detected.  
CELLZ01\_ALERT\_1\_G WARNING: H atoms missing from atom site list. Is this intentional?  
From the CIF: \_cell\_formula\_units\_Z 2  
From the CIF: \_chemical\_formula\_sum C39 H48 Br Mo5 N26 Se5  
TEST: Compare cell contents of formula and atom\_site data

| atom | Z*formula | cif sites | diff |
|------|-----------|-----------|------|
| C    | 78.00     | 78.00     | 0.00 |
| H    | 96.00     | 88.00     | 8.00 |
| Br   | 2.00      | 2.00      | 0.00 |
| Mo   | 10.00     | 10.00     | 0.00 |
| N    | 52.00     | 52.00     | 0.00 |
| Se   | 10.00     | 10.00     | 0.00 |

PLAT007\_ALERT\_5\_G Number of Unrefined Donor-H Atoms ..... 2 Report

PLAT168\_ALERT\_4\_G The CIF-Embedded .res File Contains EXYZ Records 1 Report

PLAT171\_ALERT\_4\_G The CIF-Embedded .res File Contains EADP Records 1 Report

PLAT232\_ALERT\_2\_G Hirshfeld Test Diff (M-X) Mo1 --Se2 . 7.3 s.u.

PLAT232\_ALERT\_2\_G Hirshfeld Test Diff (M-X) Mo2 --Se1 . 18.0 s.u.

PLAT232\_ALERT\_2\_G Hirshfeld Test Diff (M-X) Mo2 --Se2\_a . 8.5 s.u.

PLAT300\_ALERT\_4\_G Atom Site Occupancy of N12 Constrained at 0.25 Check

PLAT300\_ALERT\_4\_G Atom Site Occupancy of C12 Constrained at 0.25 Check

PLAT300\_ALERT\_4\_G Atom Site Occupancy of C13 Constrained at 0.5 Check

PLAT301\_ALERT\_3\_G Main Residue Disorder .....(Resd 1 ) 4% Note

PLAT302\_ALERT\_4\_G Anion/Solvent/Minor-Residue Disorder (Resd 4 ) 100% Note

PLAT304\_ALERT\_4\_G Non-Integer Number of Atoms in ..... (Resd 3 ) 0.25 Check

PLAT304\_ALERT\_4\_G Non-Integer Number of Atoms in ..... (Resd 4 ) 0.50 Check

PLAT432\_ALERT\_2\_G Short Inter X...Y Contact N11 ..C13 . 2.25 Ang.

1/2-x, 1/2-y, z = 3\_555 Check

PLAT432\_ALERT\_2\_G Short Inter X...Y Contact N11 ..C13 . 2.25 Ang.

y, 1/2-x, z = 4\_555 Check

PLAT432\_ALERT\_2\_G Short Inter X...Y Contact N11 ..C13 . 2.25 Ang.

x, y, z = 1\_555 Check

PLAT432\_ALERT\_2\_G Short Inter X...Y Contact N11 ..C13 . 2.25 Ang.

1/2-y, x, z = 2\_555 Check

PLAT432\_ALERT\_2\_G Short Inter X...Y Contact C13 ..C13 . 0.96 Ang.

y, 1/2-x, z = 4\_555 Check

PLAT432\_ALERT\_2\_G Short Inter X...Y Contact C13 ..C13 . 0.96 Ang.

1/2-y, x, z = 2\_555 Check



It is advisable to attempt to resolve as many as possible of the alerts in all categories. Often the minor alerts point to easily fixed oversights, errors and omissions in your CIF or refinement strategy, so attention to these fine details can be worthwhile. In order to resolve some of the more serious problems it may be necessary to carry out additional measurements or structure refinements. However, the purpose of your study may justify the reported deviations and the more serious of these should normally be commented upon in the discussion or experimental section of a paper or in the "special\_details" fields of the CIF. checkCIF was carefully designed to identify outliers and unusual parameters, but every test has its limitations and alerts that are not important in a particular case may appear. Conversely, the absence of alerts does not guarantee there are no aspects of the results needing attention. It is up to the individual to critically assess their own results and, if necessary, seek expert advice.

### **Publication of your CIF in IUCr journals**

A basic structural check has been run on your CIF. These basic checks will be run on all CIFs submitted for publication in IUCr journals (*Acta Crystallographica*, *Journal of Applied Crystallography*, *Journal of Synchrotron Radiation*); however, if you intend to submit to *Acta Crystallographica Section C* or *E* or *IUCrData*, you should make sure that full publication checks are run on the final version of your CIF prior to submission.

### **Publication of your CIF in other journals**

Please refer to the *Notes for Authors* of the relevant journal for any special instructions relating to CIF submission.

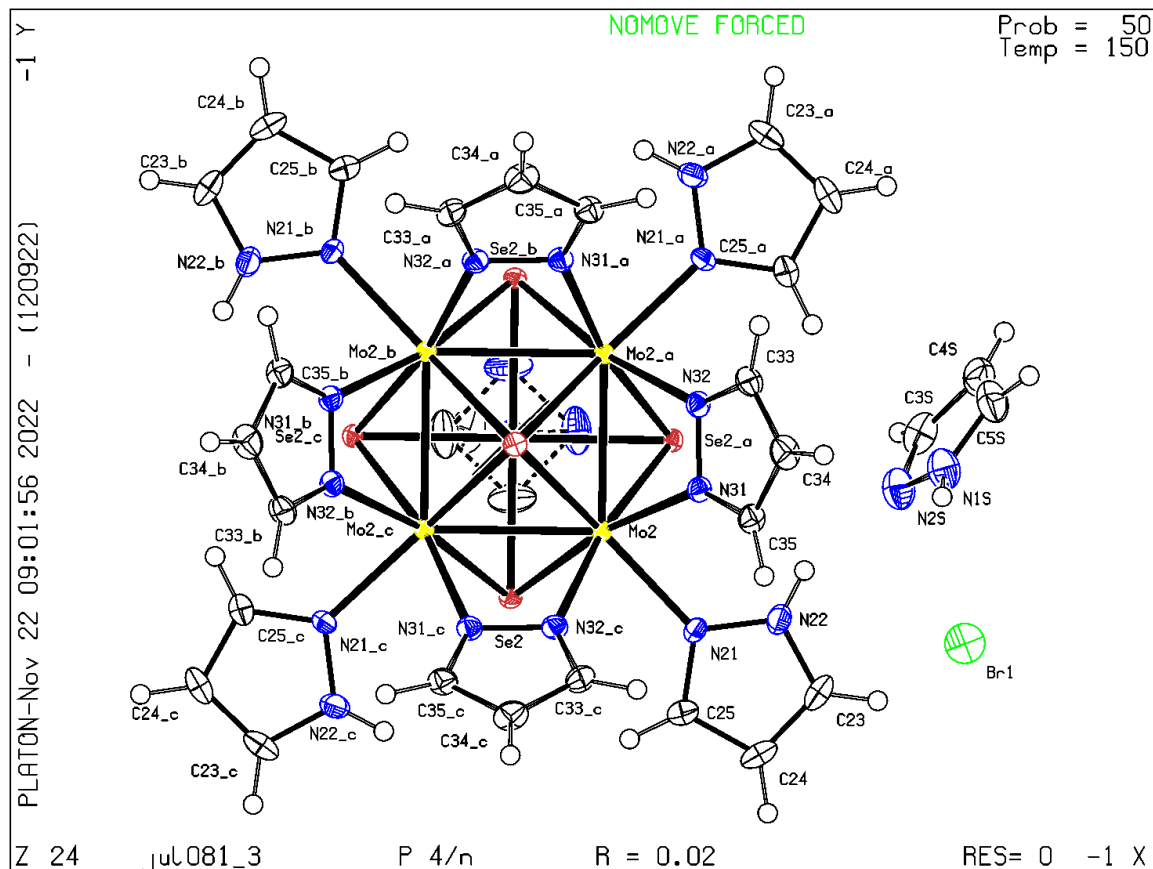

Supplement: s1 [file s1]
