# Supplementary material for: Unusual Square Pyramidal Chalcogenide Mo5 Cluster with Bridging Pyrazolate-Ligands
Source: MDPI journal article supplement (doi:10.3390/ijms24043440), 2023-02-08

## checkCIF/PLATON report

Structure factors have been supplied for datablock(s) jul086

THIS REPORT IS FOR GUIDANCE ONLY. IF USED AS PART OF A REVIEW PROCEDURE FOR PUBLICATION, IT SHOULD NOT REPLACE THE EXPERTISE OF AN EXPERIENCED CRYSTALLOGRAPHIC REFEREE.

No syntax errors found.      CIF dictionary      Interpreting this report

### Datablock: jul086

---

Bond precision:      C-C = 0.0151 Å      Wavelength=0.71073

Cell:                      a=15.632 (1)              b=25.5634 (15)              c=12.2766 (8)  
                                alpha=90              beta=90              gamma=90

Temperature:              150 K

|                        | Calculated                                        | Reported                                 |
|------------------------|---------------------------------------------------|------------------------------------------|
| Volume                 | 4905.8 (5)                                        | 4905.8 (5)                               |
| Space group            | C 2 2 21                                          | C 2 2 21                                 |
| Hall group             | C 2c 2                                            | C 2c 2                                   |
| Moiety formula         | 4 (C27 H28 Mo5 N18 Se5),<br>3 (O2), 8 (Br), 2 (O) | C27 H32 Mo5 N18 Se5, 2 (Br),<br>2 (H2 O) |
| Sum formula            | C108 H112 Br8 Mo20 N72 O8<br>Se20                 | C27 H36 Br2 Mo5 N18 O2 Se5               |
| Mr                     | 6683.90                                           | 1679.06                                  |
| Dx, g cm <sup>-3</sup> | 2.262                                             | 2.273                                    |
| Z                      | 1                                                 | 4                                        |
| Mu (mm <sup>-1</sup> ) | 6.629                                             | 6.629                                    |
| F000                   | 3128.0                                            | 3160.0                                   |
| F000'                  | 3090.39                                           |                                          |
| h, k, lmax             | 20, 32, 15                                        | 20, 32, 15                               |
| Nref                   | 5505 [ 3043]                                      | 5450                                     |
| Tmin, Tmax             | 0.315, 0.451                                      | 0.519, 0.746                             |
| Tmin'                  | 0.239                                             |                                          |

Correction method= # Reported T Limits: Tmin=0.519 Tmax=0.746

AbsCorr = MULTI-SCAN

Data completeness= 1.79/0.99

Theta (max)= 27.256

R(reflections)= 0.0331( 4676)

wR2(reflections)=  
0.0852( 5450)

S = 1.064

Npar= 293

The following ALERTS were generated. Each ALERT has the format

**test-name\_ALERT\_alert-type\_alert-level.**

Click on the hyperlinks for more details of the test.

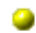

### Alert level C

STRVA01\_ALERT\_4\_C                      Flack test results are ambiguous.  
                    From the CIF: \_refine\_ls\_abs\_structure\_Flack        0.423  
                    From the CIF: \_refine\_ls\_abs\_structure\_Flack\_su    0.011  
PLAT041\_ALERT\_1\_C Calc. and Reported SumFormula        Strings Differ        Please Check  
PLAT042\_ALERT\_1\_C Calc. and Reported MoietyFormula Strings Differ        Please Check  
PLAT043\_ALERT\_1\_C Calculated and Reported Mol. Weight Differ by ..        32.34 Check  
PLAT068\_ALERT\_1\_C Reported F000 Differs from Calcd (or Missing)...        Please Check  
PLAT260\_ALERT\_2\_C Large Average Ueq of Residue Including        O3W        0.118 Check  
PLAT260\_ALERT\_2\_C Large Average Ueq of Residue Including        O2W        0.118 Check  
PLAT342\_ALERT\_3\_C Low Bond Precision on C-C Bonds .....        0.01512 Ang.  
PLAT601\_ALERT\_2\_C Unit Cell Contains Solvent Accessible VOIDS of .        34 Ang\*\*3  
PLAT911\_ALERT\_3\_C Missing FCF Refl Between Thmin & STh/L=        0.600        3 Report

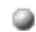

### Alert level G

FORMU01\_ALERT\_2\_G There is a discrepancy between the atom counts in the  
                    \_chemical\_formula\_sum and the formula from the \_atom\_site\* data.  
                    Atom count from \_chemical\_formula\_sum: C27 H36 Br2 Mo5 N18 O2 Se5  
                    Atom count from the \_atom\_site data: C27 H28 Br2 Mo5 N18 O2 Se5  
CELLZ01\_ALERT\_1\_G Difference between formula and atom\_site contents detected.  
CELLZ01\_ALERT\_1\_G WARNING: H atoms missing from atom site list. Is this intentional?  
                    From the CIF: \_cell\_formula\_units\_Z        4  
                    From the CIF: \_chemical\_formula\_sum    C27 H36 Br2 Mo5 N18 O2 Se5  
                    TEST: Compare cell contents of formula and atom\_site data

| atom | Z*formula | cif sites | diff  |
|------|-----------|-----------|-------|
| C    | 108.00    | 108.00    | 0.00  |
| H    | 144.00    | 112.00    | 32.00 |
| Br   | 8.00      | 8.00      | 0.00  |
| Mo   | 20.00     | 20.00     | 0.00  |
| N    | 72.00     | 72.00     | 0.00  |
| O    | 8.00      | 8.00      | 0.00  |
| Se   | 20.00     | 20.00     | 0.00  |

PLAT003\_ALERT\_2\_G Number of Uiso or Uij Restrained non-H Atoms ...        2 Report  
PLAT007\_ALERT\_5\_G Number of Unrefined Donor-H Atoms .....        2 Report  
PLAT033\_ALERT\_4\_G Flack x Value Deviates > 3.0 \* sigma from Zero .        0.423 Note  
PLAT045\_ALERT\_1\_G Calculated and Reported Z Differ by a Factor ...        0.250 Check  
PLAT171\_ALERT\_4\_G The CIF-Embedded .res File Contains EADP Records        2 Report  
PLAT186\_ALERT\_4\_G The CIF-Embedded .res File Contains ISOR Records        1 Report  
PLAT300\_ALERT\_4\_G Atom Site Occupancy of N12        Constrained at        0.5 Check  
PLAT300\_ALERT\_4\_G Atom Site Occupancy of C13        Constrained at        0.5 Check  
PLAT300\_ALERT\_4\_G Atom Site Occupancy of C14        Constrained at        0.5 Check  
PLAT300\_ALERT\_4\_G Atom Site Occupancy of C15        Constrained at        0.5 Check  
PLAT300\_ALERT\_4\_G Atom Site Occupancy of O1W        Constrained at        0.5 Check  
PLAT300\_ALERT\_4\_G Atom Site Occupancy of O3W        Constrained at        0.25 Check

|                   |                                                  |                |       |              |
|-------------------|--------------------------------------------------|----------------|-------|--------------|
| PLAT300_ALERT_4_G | Atom Site Occupancy of O2W                       | Constrained at | 0.25  | Check        |
| PLAT301_ALERT_3_G | Main Residue Disorder .....                      | (Resd 1 )      | 7%    | Note         |
| PLAT302_ALERT_4_G | Anion/Solvent/Minor-Residue Disorder             | (Resd 2 )      | 100%  | Note         |
| PLAT302_ALERT_4_G | Anion/Solvent/Minor-Residue Disorder             | (Resd 3 )      | 100%  | Note         |
| PLAT302_ALERT_4_G | Anion/Solvent/Minor-Residue Disorder             | (Resd 5 )      | 100%  | Note         |
| PLAT304_ALERT_4_G | Non-Integer Number of Atoms in .....             | (Resd 3 )      | 0.50  | Check        |
| PLAT304_ALERT_4_G | Non-Integer Number of Atoms in .....             | (Resd 5 )      | 0.25  | Check        |
| PLAT311_ALERT_2_G | Isolated Disordered Oxygen Atom (No H's ?)       | .....          | 01W   | Check        |
| PLAT311_ALERT_2_G | Isolated Disordered Oxygen Atom (No H's ?)       | .....          | 02W   | Check        |
| PLAT764_ALERT_4_G | Overcomplete CIF Bond List Detected (Rep/Expd)   | .              | 1.22  | Ratio        |
| PLAT773_ALERT_2_G | Check long C-C Bond in CIF: C15                  | --C15          | 1.81  | Ang.         |
| PLAT773_ALERT_2_G | Check long C-C Bond in CIF: C15                  | --C14          | 1.83  | Ang.         |
| PLAT773_ALERT_2_G | Check long C-C Bond in CIF: C13                  | --C13          | 1.95  | Ang.         |
| PLAT779_ALERT_4_G | Suspect or Irrelevant (Bond) Angle(s) in CIF ... |                | 15.10 | Deg.         |
|                   | C15 -N11 -N12 4_555 1_555 1_555 .....            | # 122          | Check |              |
| PLAT779_ALERT_4_G | Suspect or Irrelevant (Bond) Angle(s) in CIF ... |                | 15.10 | Deg.         |
|                   | C15 -N11 -N12 1_555 1_555 4_555 .....            | # 125          | Check |              |
| PLAT779_ALERT_4_G | Suspect or Irrelevant (Bond) Angle(s) in CIF ... |                | 34.00 | Deg.         |
|                   | C15 -N12 -C14 4_555 1_555 4_555 .....            | # 134          | Check |              |
| PLAT779_ALERT_4_G | Suspect or Irrelevant (Bond) Angle(s) in CIF ... |                | 19.20 | Deg.         |
|                   | C13 -N12 -C14 1_555 1_555 4_555 .....            | # 135          | Check |              |
| PLAT779_ALERT_4_G | Suspect or Irrelevant (Bond) Angle(s) in CIF ... |                | 25.90 | Deg.         |
|                   | C13 -C15 -C14 4_555 1_555 1_555 .....            | # 141          | Check |              |
| PLAT779_ALERT_4_G | Suspect or Irrelevant (Bond) Angle(s) in CIF ... |                | 44.10 | Deg.         |
|                   | N11 -C15 -C15 1_555 1_555 4_555 .....            | # 145          | Check |              |
| PLAT779_ALERT_4_G | Suspect or Irrelevant (Bond) Angle(s) in CIF ... |                | 20.80 | Deg.         |
|                   | C14 -C15 -C14 1_555 1_555 4_555 .....            | # 150          | Check |              |
| PLAT779_ALERT_4_G | Suspect or Irrelevant (Bond) Angle(s) in CIF ... |                | 6.00  | Deg.         |
|                   | C14 -C14 -C13 4_555 1_555 1_555 .....            | # 154          | Check |              |
| PLAT779_ALERT_4_G | Suspect or Irrelevant (Bond) Angle(s) in CIF ... |                | 9.00  | Deg.         |
|                   | C15 -C14 -N12 1_555 1_555 4_555 .....            | # 161          | Check |              |
| PLAT779_ALERT_4_G | Suspect or Irrelevant (Bond) Angle(s) in CIF ... |                | 41.00 | Deg.         |
|                   | C13 -C14 -C15 1_555 1_555 4_555 .....            | # 164          | Check |              |
| PLAT779_ALERT_4_G | Suspect or Irrelevant (Bond) Angle(s) in CIF ... |                | 7.00  | Deg.         |
|                   | C14 -C13 -C14 4_555 1_555 1_555 .....            | # 228          | Check |              |
| PLAT779_ALERT_4_G | Suspect or Irrelevant (Bond) Angle(s) in CIF ... |                | 16.00 | Deg.         |
|                   | C15 -C13 -N12 4_555 1_555 1_555 .....            | # 231          | Check |              |
| PLAT779_ALERT_4_G | Suspect or Irrelevant (Bond) Angle(s) in CIF ... |                | 13.00 | Deg.         |
|                   | C14 -C13 -C13 4_555 1_555 4_555 .....            | # 233          | Check |              |
| PLAT779_ALERT_4_G | Suspect or Irrelevant (Bond) Angle(s) in CIF ... |                | 6.00  | Deg.         |
|                   | C14 -C13 -C13 1_555 1_555 4_555 .....            | # 235          | Check |              |
| PLAT860_ALERT_3_G | Number of Least-Squares Restraints .....         |                | 12    | Note         |
| PLAT898_ALERT_4_G | Second Reported H-M Symbol in CIF Ignored .....  |                | !     | Check        |
| PLAT910_ALERT_3_G | Missing # of FCF Reflection(s) Below Theta(Min). |                | 2     | Note         |
| PLAT912_ALERT_4_G | Missing # of FCF Reflections Above STh/L= 0.600  |                | 17    | Note         |
| PLAT933_ALERT_2_G | Number of HKL-OMIT Records in Embedded .res File |                | 4     | Note         |
| PLAT961_ALERT_5_G | Dataset Contains no Negative Intensities .....   |                |       | Please Check |
| PLAT978_ALERT_2_G | Number C-C Bonds with Positive Residual Density. |                | 0     | Info         |

---

0 **ALERT level A** = Most likely a serious problem - resolve or explain  
 0 **ALERT level B** = A potentially serious problem, consider carefully  
 10 **ALERT level C** = Check. Ensure it is not caused by an omission or oversight  
 49 **ALERT level G** = General information/check it is not something unexpected

7 ALERT type 1 CIF construction/syntax error, inconsistent or missing data

12 ALERT type 2 Indicator that the structure model may be wrong or deficient  
5 ALERT type 3 Indicator that the structure quality may be low  
33 ALERT type 4 Improvement, methodology, query or suggestion  
2 ALERT type 5 Informative message, check

---

---

It is advisable to attempt to resolve as many as possible of the alerts in all categories. Often the minor alerts point to easily fixed oversights, errors and omissions in your CIF or refinement strategy, so attention to these fine details can be worthwhile. In order to resolve some of the more serious problems it may be necessary to carry out additional measurements or structure refinements. However, the purpose of your study may justify the reported deviations and the more serious of these should normally be commented upon in the discussion or experimental section of a paper or in the "special\_details" fields of the CIF. checkCIF was carefully designed to identify outliers and unusual parameters, but every test has its limitations and alerts that are not important in a particular case may appear. Conversely, the absence of alerts does not guarantee there are no aspects of the results needing attention. It is up to the individual to critically assess their own results and, if necessary, seek expert advice.

### **Publication of your CIF in IUCr journals**

A basic structural check has been run on your CIF. These basic checks will be run on all CIFs submitted for publication in IUCr journals (*Acta Crystallographica*, *Journal of Applied Crystallography*, *Journal of Synchrotron Radiation*); however, if you intend to submit to *Acta Crystallographica Section C* or *E* or *IUCrData*, you should make sure that full publication checks are run on the final version of your CIF prior to submission.

### **Publication of your CIF in other journals**

Please refer to the *Notes for Authors* of the relevant journal for any special instructions relating to CIF submission.

---

**PLATON version of 12/09/2022; check.def file version of 09/08/2022**

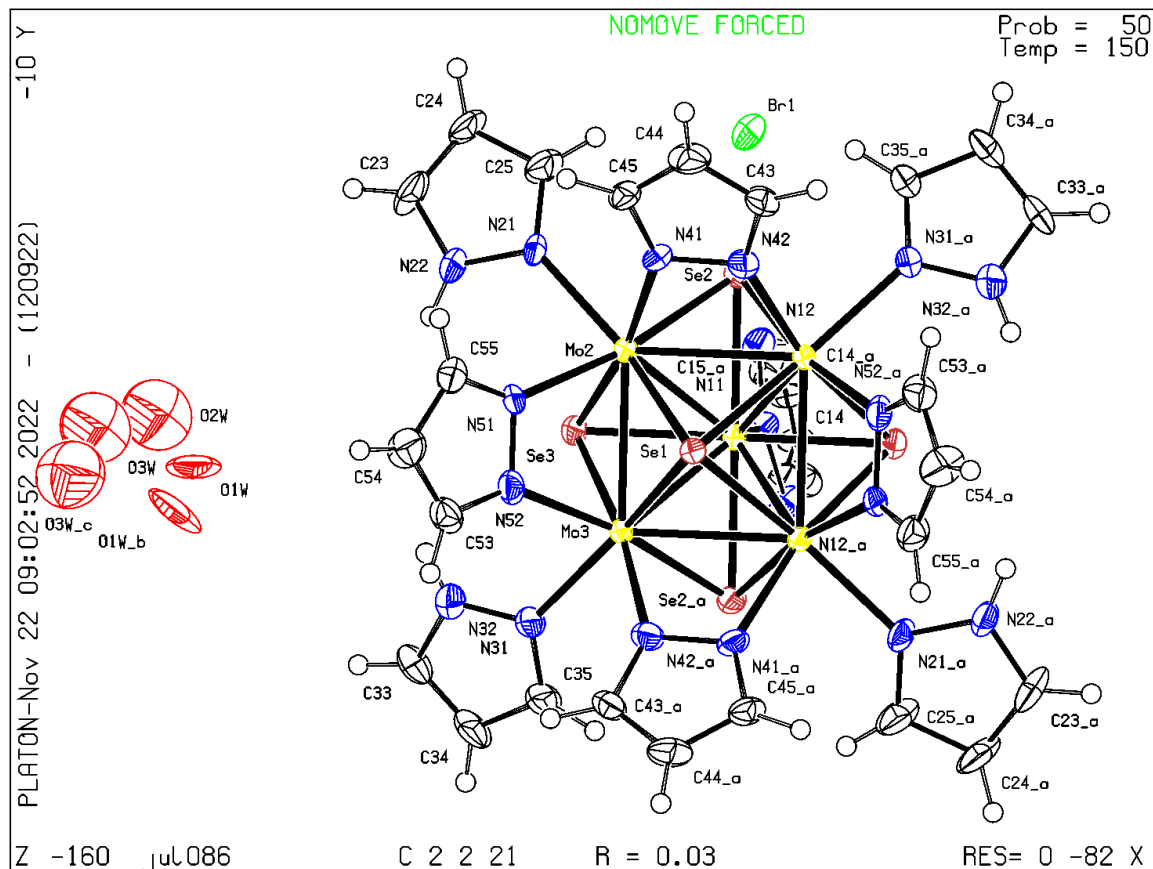

Supplement: s1 [file s1]
