# Supplementary material for: Unusual Square Pyramidal Chalcogenide Mo5 Cluster with Bridging Pyrazolate-Ligands
Source: MDPI journal article supplement (doi:10.3390/ijms24043440), 2023-02-08
Supplement: s1 [file s1]

# Unusual Square Pyramidal Chalcogenide Mo<sub>5</sub> Cluster with Bridging Pyrazolate-Ligands

Iulia V. Savina <sup>1</sup>, Anton A. Ivanov <sup>1,\*</sup>, Darya V. Evtushok <sup>1</sup>, Yakov M. Gayfulin <sup>1</sup>,  
Andrey Y. Komarovskikh <sup>1</sup>, Mikhail M. Syrokvashin <sup>1</sup>, Mariia N. Ivanova <sup>1</sup>, Igor P. Asanov <sup>1</sup>,  
Ilia V. Eltsov <sup>2</sup>, Natalia V. Kuratieva <sup>1</sup>, Yuri V. Mironov <sup>1,\*</sup> and Michael A. Shestopalov <sup>1</sup>

<sup>1</sup> Nikolaev Institute of Inorganic Chemistry of Siberian Branch of Russian Academy of Sciences, 3 Acad. Lavrentiev ave., 630090, Novosibirsk, Russia

<sup>2</sup> Department of Natural Sciences, Novosibirsk State University, 1 Pirogova st., 630090, Novosibirsk, Russia

\*Correspondence: ivanov338@niic.nsc.ru (A.A.I.), yuri@niic.nsc.ru (Y.V.M.)

## TABLE OF CONTENT

|                                                                                                  |           |
|--------------------------------------------------------------------------------------------------|-----------|
| <b>Powder X-ray diffraction analysis .....</b>                                                   | <b>3</b>  |
| <b>UV-vis spectroscopy .....</b>                                                                 | <b>4</b>  |
| <b>Mo<sub>5</sub>red: packing in crystal structure.....</b>                                      | <b>5</b>  |
| <b>Mo<sub>5</sub>ox: packing in crystal structure and powder X-ray diffraction analysis.....</b> | <b>8</b>  |
| <b>DFT calculations .....</b>                                                                    | <b>10</b> |
| <b>XPS data .....</b>                                                                            | <b>13</b> |
| <b>NMR spectroscopy data .....</b>                                                               | <b>18</b> |
| <b>Mass-spectrometry data .....</b>                                                              | <b>22</b> |
| <b>EPR spectroscopy data .....</b>                                                               | <b>23</b> |
| <b>Cyclic voltammetry data.....</b>                                                              | <b>25</b> |
| <b>Characterization of compounds: IR spectra, TGA curves, UV-vis spectra and PXRD data .....</b> | <b>26</b> |
| <b>Crystal structure data .....</b>                                                              | <b>29</b> |

## Powder X-ray diffraction analysis

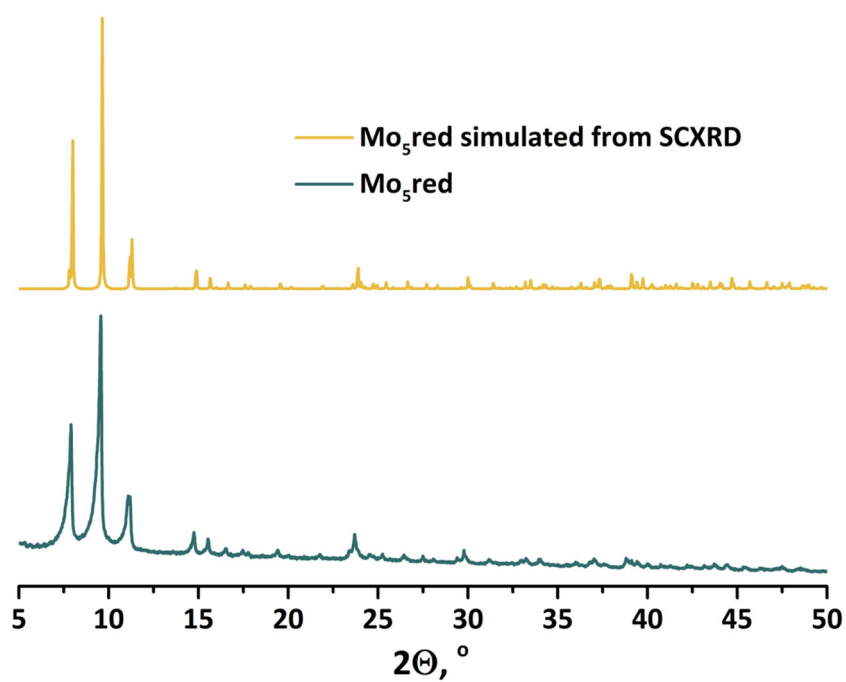

**Figure S1.** XRPD pattern of **Mo<sub>5</sub>red** in comparison with calculated one from the SCXRD data.

## UV-vis spectroscopy

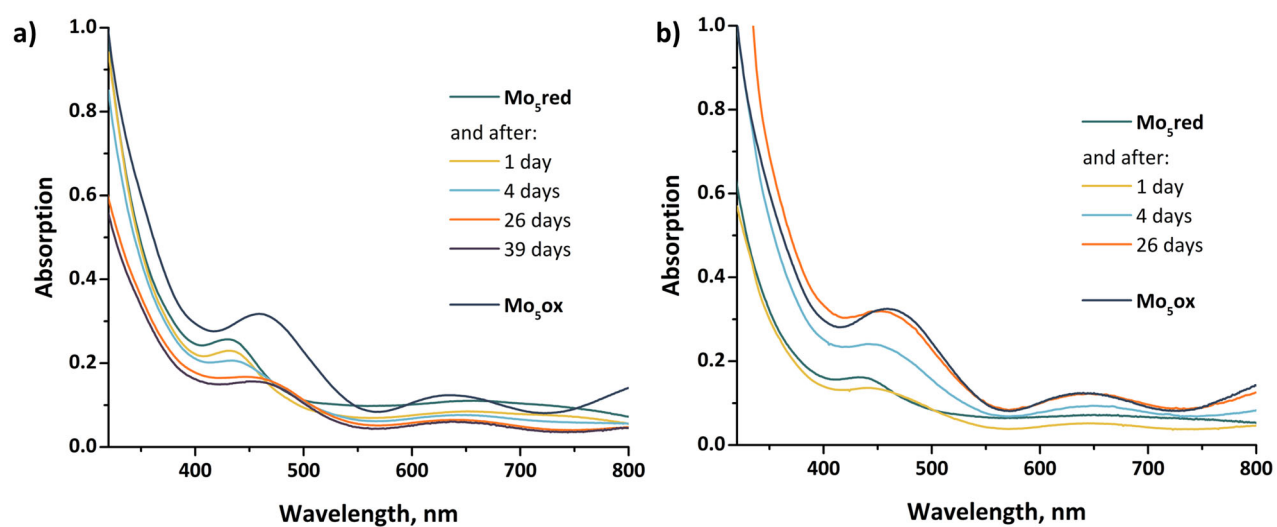

**Figure S2.** UV-vis spectra of  $\text{Mo}_5\text{red}$  acetonitrile (a) or DCM (b) solutions in time in comparison with  $\text{Mo}_5\text{ox}$ .

## Mo<sub>5</sub>red: packing in crystal structure

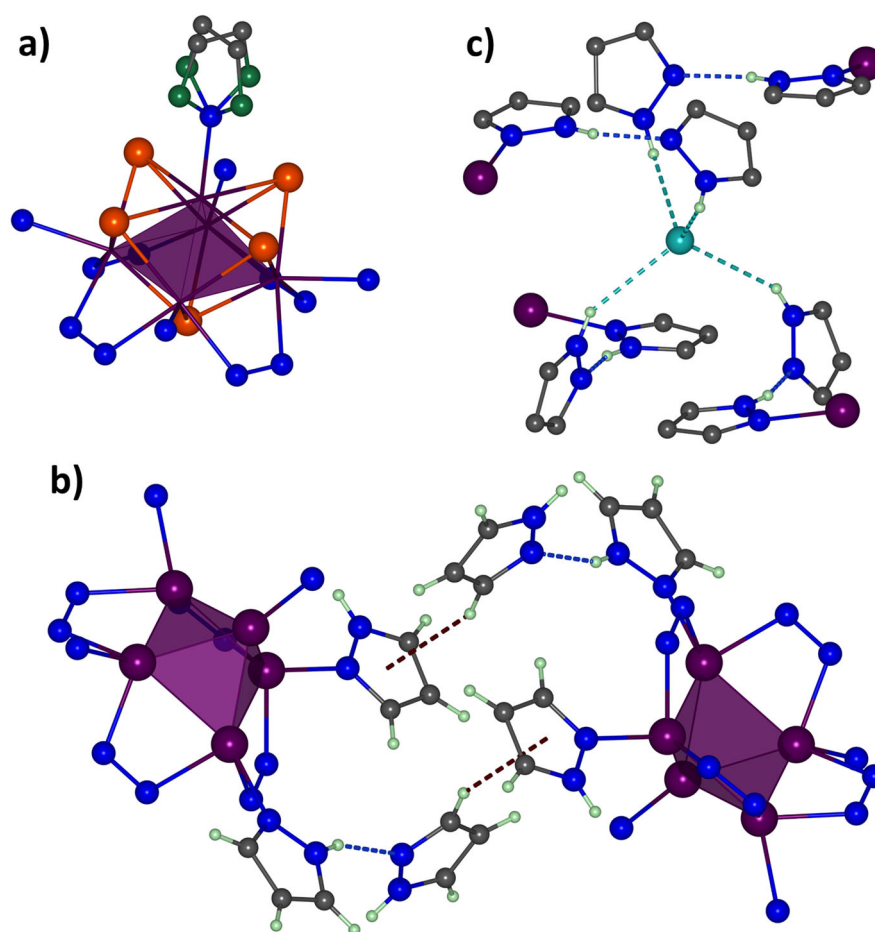

**Figure S3.** Packing in the crystal structure of **Mo<sub>5</sub>red**. a) Disorder of axial pyrazole ligand over four positions. b) Hydrogen bonds and C-H... $\pi$  stacking interactions between solvated pyrazole molecules and pzH-ligands. c) Hydrogen bonds between bromine-ion and solvated pyrazole molecules. Color code: Mo – violet, Mo<sub>5</sub> – violet square pyramid, C – gray, N – blue, Br – cyan, H – light green, disordered C/N – green, C-H... $\pi$  – red, N-H...N – blue, N-H...Br – cyan.

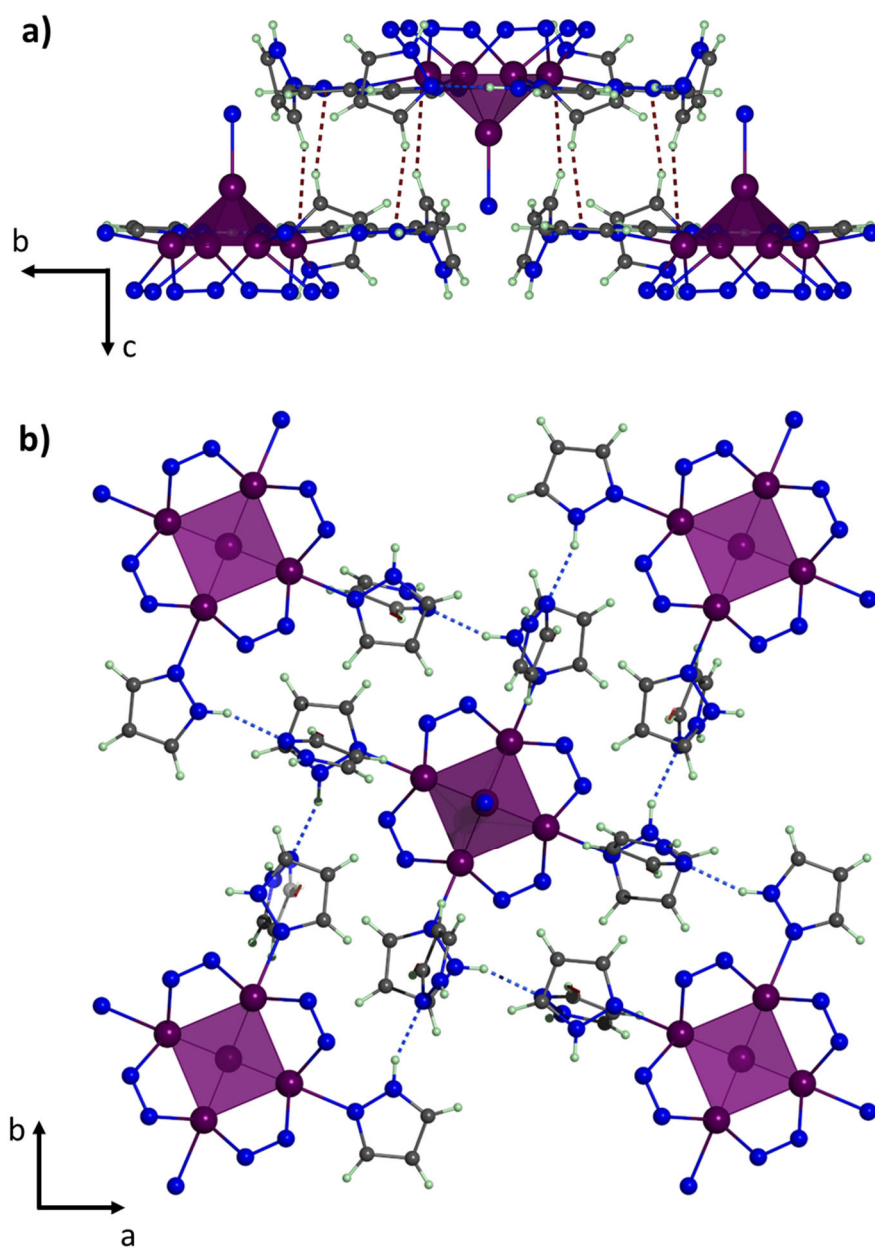

**Figure S4.** Packing in the crystal structure of **Mo<sub>5</sub>red**. Hydrogen bonds and C-H... $\pi$  stacking interactions between solvated pyrazole molecules and pzH-ligands along *a* (a) and *c* (b) axis. Color code: Mo – violet, Mo<sub>5</sub> – violet square pyramid, C – gray, N – blue, Br – cyan, H – light green, disordered C/N – green, C-H... $\pi$  – red, N-H...N – blue, N-H...Br – cyan.

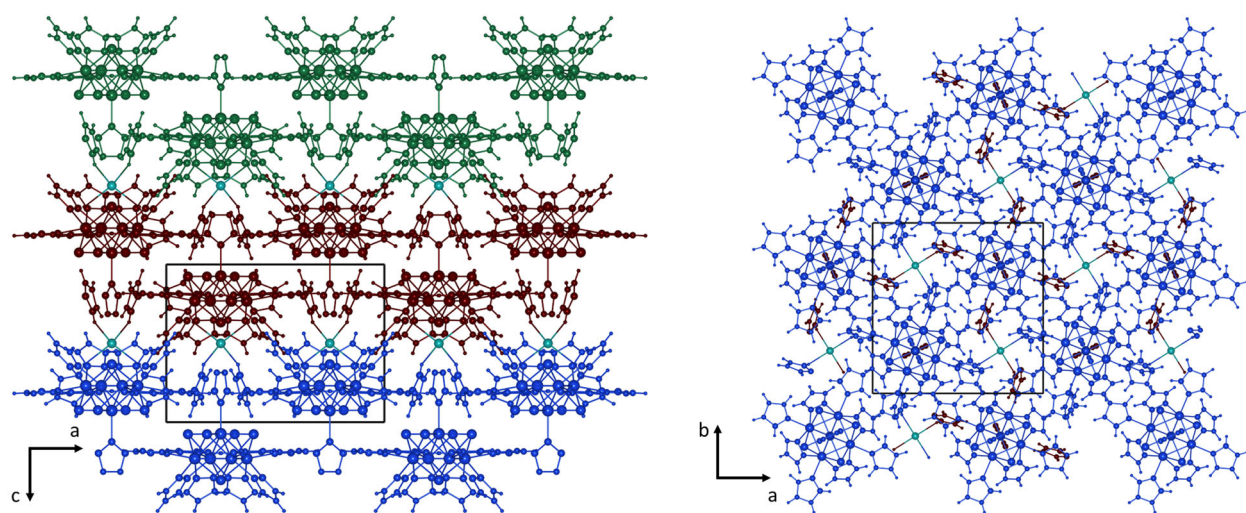

**Figure S5.** Packing of layers in the crystal structure of **Mo<sub>5</sub>red**: side (left) and top (right) view.

## Mo<sub>5</sub>ox: packing in crystal structure and powder X-ray diffraction analysis

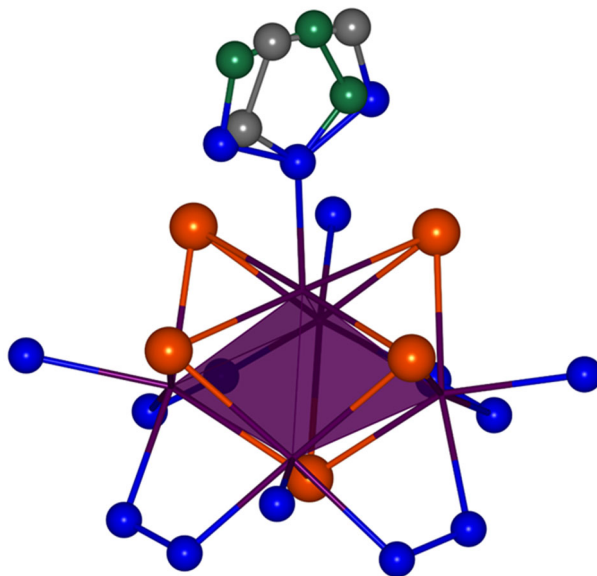

**Figure S6.** Disorder of axial pyrazole ligand over two positions in the crystal structure of **Mo<sub>5</sub>ox**. Color code: Mo – violet, Mo<sub>5</sub> – violet square pyramid, C – gray/green, N – blue.

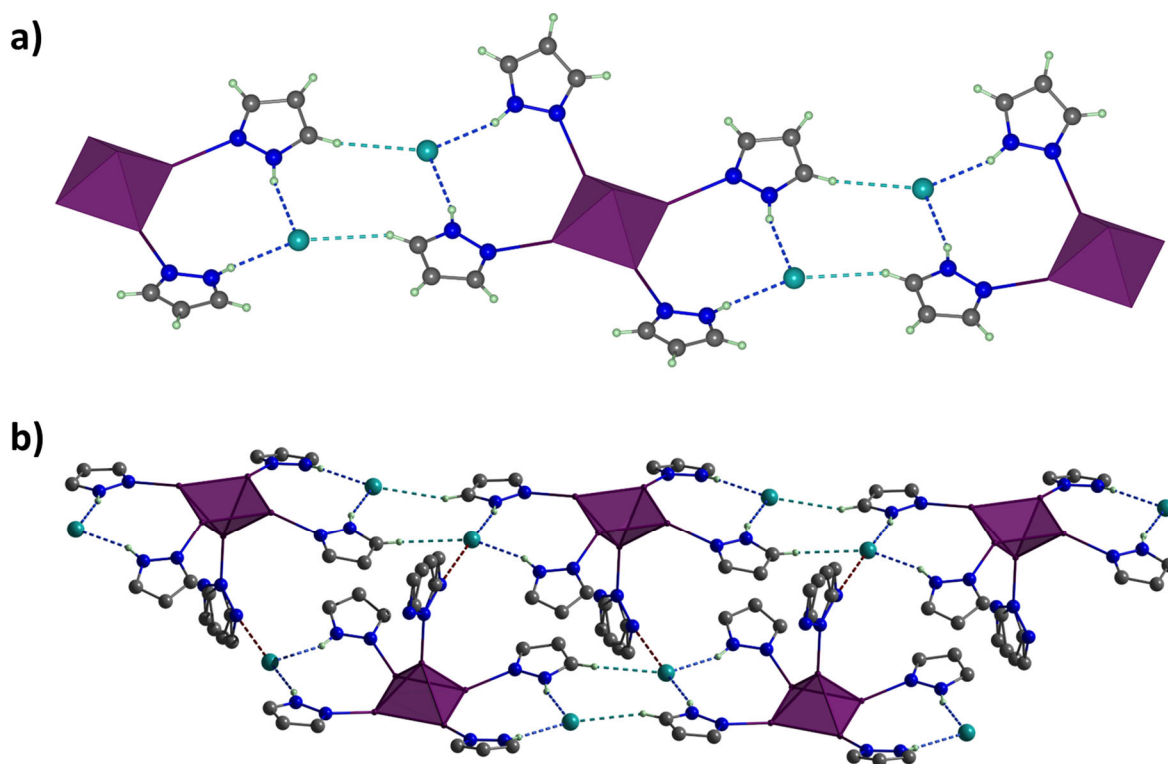

**Figure S7.** Packing in the crystal structure of **Mo<sub>5</sub>ox**. a) Hydrogen bonds between terminal pyrazole ligands and Br forming infinite chains. b) Hydrogen bonds between bromine-ion and axial pyrazoles connecting chains. Color code: Mo – violet, Mo<sub>5</sub> – violet square pyramid, C – gray, N – blue, Br – cyan, H – light green, C-H...Br – cyan, N<sup>eq</sup>-H...Br – blue, N<sup>ax</sup>-H...Br – red.



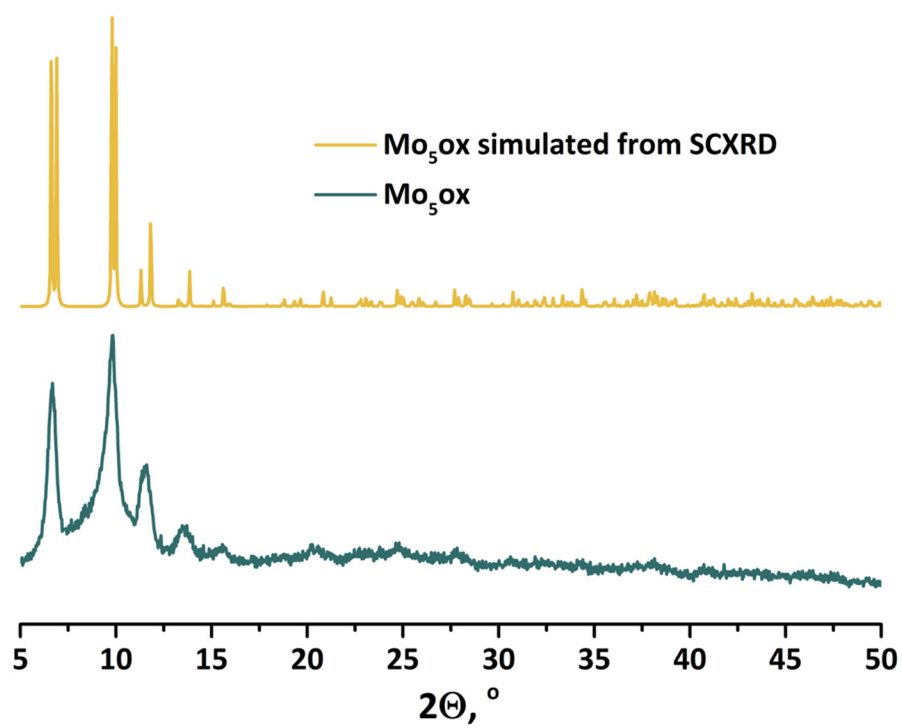

**Figure S8.** XRPD pattern of  $\text{Mo}_5\text{ox}$  in comparison with calculated one from the SCXRD data.

## DFT calculations

**Table S1.** Optimized bond lengths (range | average) within the  $[\text{Mo}_5(\mu_4\text{-Se})(\mu_3\text{-Se})_4(\mu\text{-pz})_4\text{pz}_5]^{2+/1+}$  clusters at VWN/S12g/TZP level of theory and  $C_1$  point symmetry.

| Cluster / Bond                                                                       | Mo <sub>eq</sub> –Mo <sub>eq</sub> | Mo <sub>eq</sub> –Mo <sub>ap</sub> | Mo <sub>eq</sub> –(μ <sub>3</sub> –Se) | Mo <sub>ap</sub> –(μ <sub>3</sub> –Se) | Mo <sub>eq</sub> –(μ <sub>4</sub> –Se) | Mo–N (apical pz) | Mo–N (μ–pz)     |
|--------------------------------------------------------------------------------------|------------------------------------|------------------------------------|----------------------------------------|----------------------------------------|----------------------------------------|------------------|-----------------|
| $[\text{Mo}_5(\mu_4\text{-Se})(\mu_3\text{-Se})_4(\mu\text{-pz})_4\text{pz}_5]^+$    | 2.8430–<br>2.8440                  | 2.681–<br>2.686                    | 2.530–<br>2.550                        | 2.570–<br>2.585                        | 2.558–<br>2.561                        | 2.265–<br>2.273  | 2.209–<br>2.215 |
|                                                                                      | 2.8435(6)                          | 2.684(2)                           | 2.540(8)                               | 2.574(8)                               | 2.560(1)                               | 2.270(3)         | 2.212(2)        |
|                                                                                      |                                    |                                    |                                        |                                        |                                        |                  |                 |
| $[\text{Mo}_5(\mu_4\text{-Se})(\mu_3\text{-Se})_4(\mu\text{-pz})_4\text{pz}_5]^{2+}$ | 2.862–<br>2.872                    | 2.666–<br>2.669                    | 2.514–<br>2.531                        | 2.589–<br>2.594                        | 2.5600–<br>2.5610                      | 2.245–<br>2.262  | 2.195–<br>2.204 |
|                                                                                      | 2.867(5)                           | 2.668(1)                           | 2.523(7)                               | 2.592(2)                               | 2.5603(5)                              | 2.256(7)         | 2.200(4)        |
|                                                                                      |                                    |                                    |                                        |                                        |                                        |                  |                 |

**Table S2.** Orbital energies, symmetry of molecular orbitals and percentage contributions from the metal atoms, selenide ligands and pzH molecules for the  $[\{\text{Mo}_5(\mu_4\text{-Se})(\mu_3\text{-Se})_4(\mu\text{-pz})_4\}(\text{pzH})_5]^{2+}$  cluster.

| MO           | Energy (eV) | Mo <sub>5</sub> | μ <sub>4</sub> –Se | μ <sub>3</sub> –Se | μ–pz | Outer pz |
|--------------|-------------|-----------------|--------------------|--------------------|------|----------|
| 352 (LUMO+2) | -2.384      | 75.43           | –                  | 24.57              | –    | –        |
| 351 (LUMO+1) | -3.762      | 82.12           | 2.36               | 8.76               | 6.76 | –        |
| 350 (LUMO)   | -4.306      | 67.76           | 1.29               | 30.95              | –    | –        |
| 349 (HOMO)   | -6.345      | 79.84           | 4.98               | 10.59              | 3.11 | 1.48     |
| 348 (HOMO-1) | -6.411      | 87.11           | 5.64               | 1.42               | 5.83 | –        |
| 347 (HOMO-2) | -6.684      | 73.71           | –                  | 15.65              | –    | 10.64    |

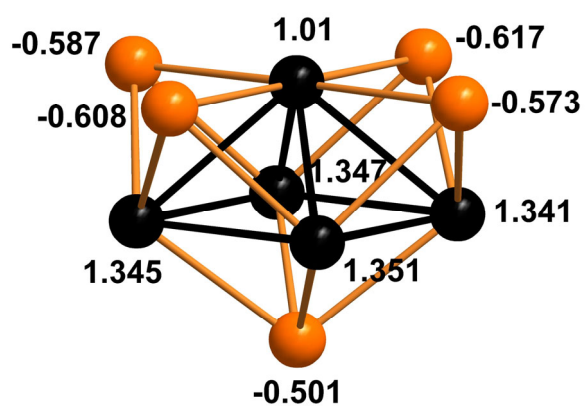

**Figure S9.** Bader charges on the atoms of the {Mo<sub>5</sub>Se<sub>5</sub>} fragment of the [{Mo<sub>5</sub>(μ<sub>4</sub>-Se)(μ<sub>3</sub>-Se)<sub>4</sub>(μ-pz)<sub>4</sub>}(pzH)<sub>5</sub>]<sup>2+</sup> cluster.

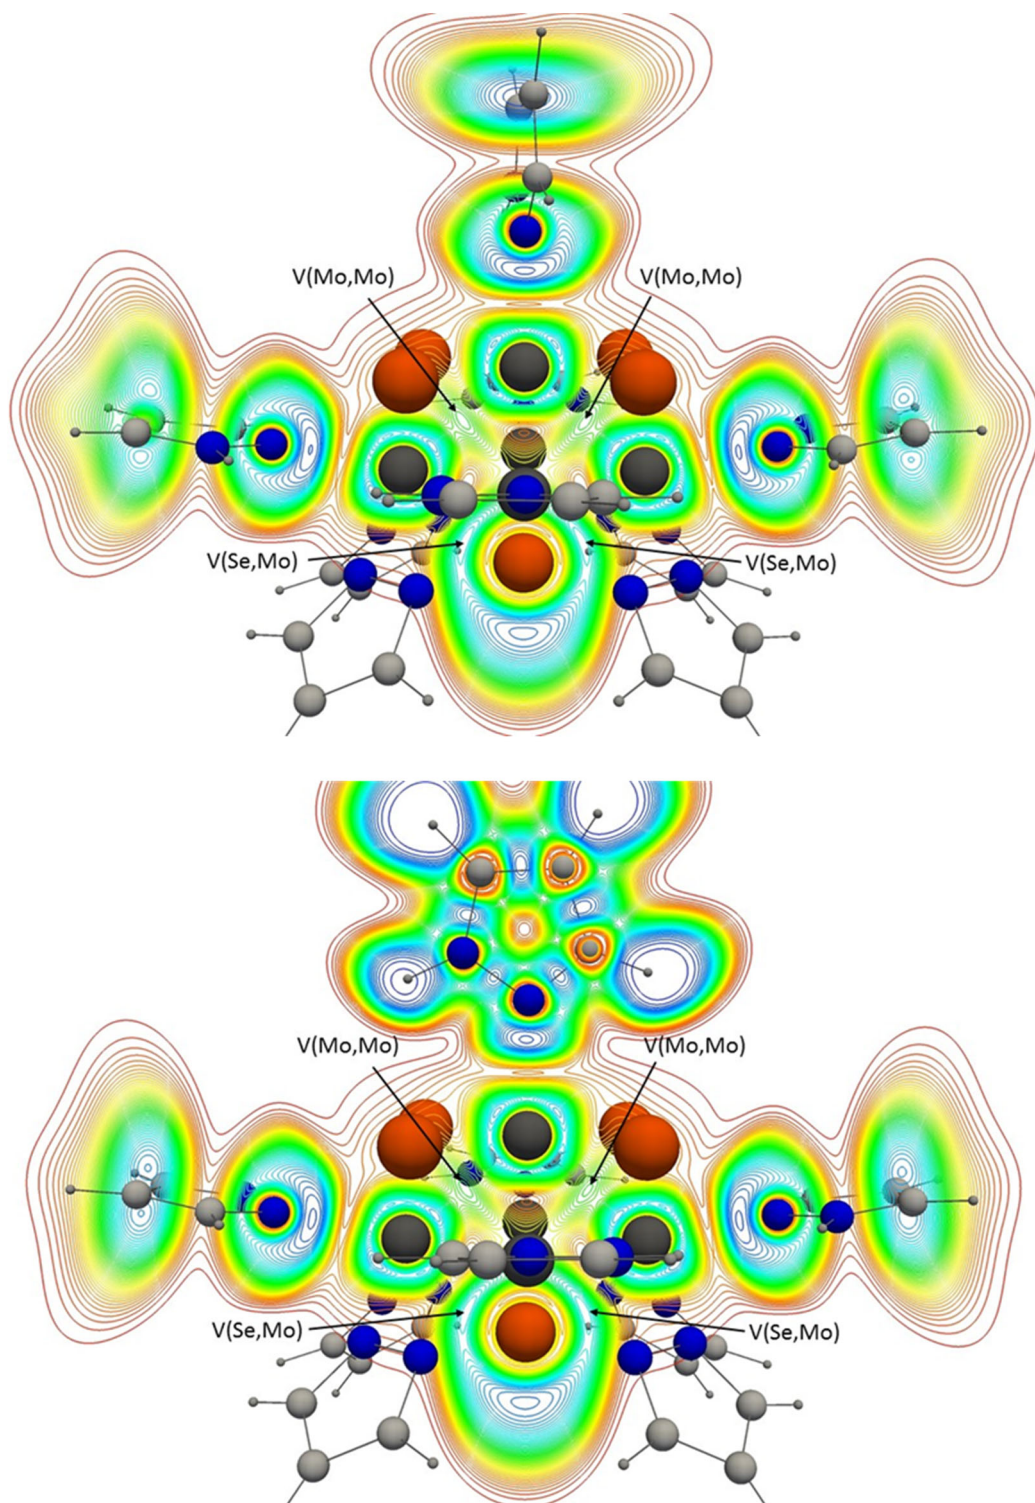

**Figure S10.** ELF maps for  $[\{\text{Mo}_5(\mu_4\text{-Se})(\mu_3\text{-Se})_4(\mu\text{-pz})_4\}(\text{pzH})_5]^{2+}$  cluster (cutting planes  $\text{Mo}_{\text{eq}}\text{--}\text{Mo}_{\text{ax}}\text{--}\text{Mo}_{\text{eq}}\text{--}(\mu_4\text{-Se})$ ). Color code: Mo, dark gray; Se, orange; N, blue; C, H, light gray. V(Mo,Mo) and V(Se,Mo) are disynaptic basins between corresponding atoms.

## XPS data

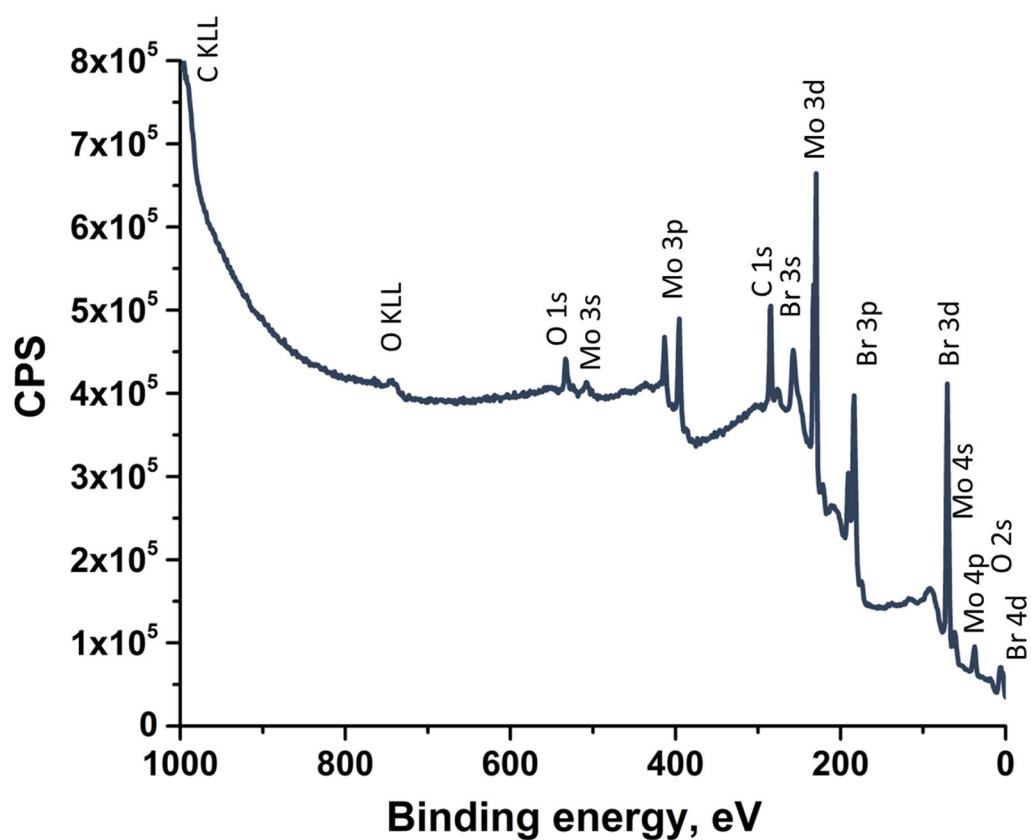

Figure S11. XPS survey spectrum of  $\text{Mo}_6\text{Br}_{12}$ .

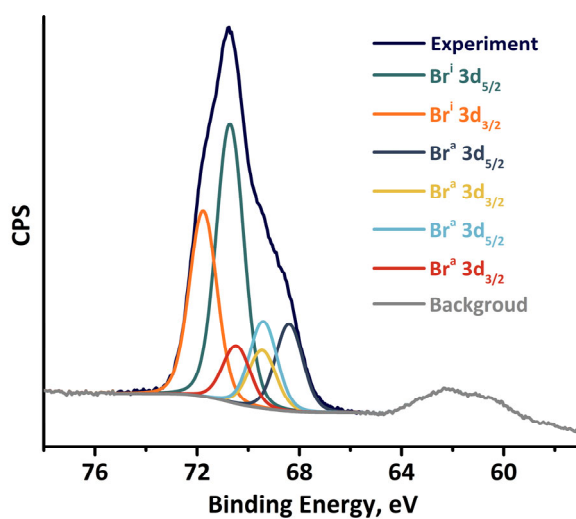

Figure S12. XPS spectrum showing Br 3d core level of  $\text{Mo}_6\text{Br}_{12}$ .

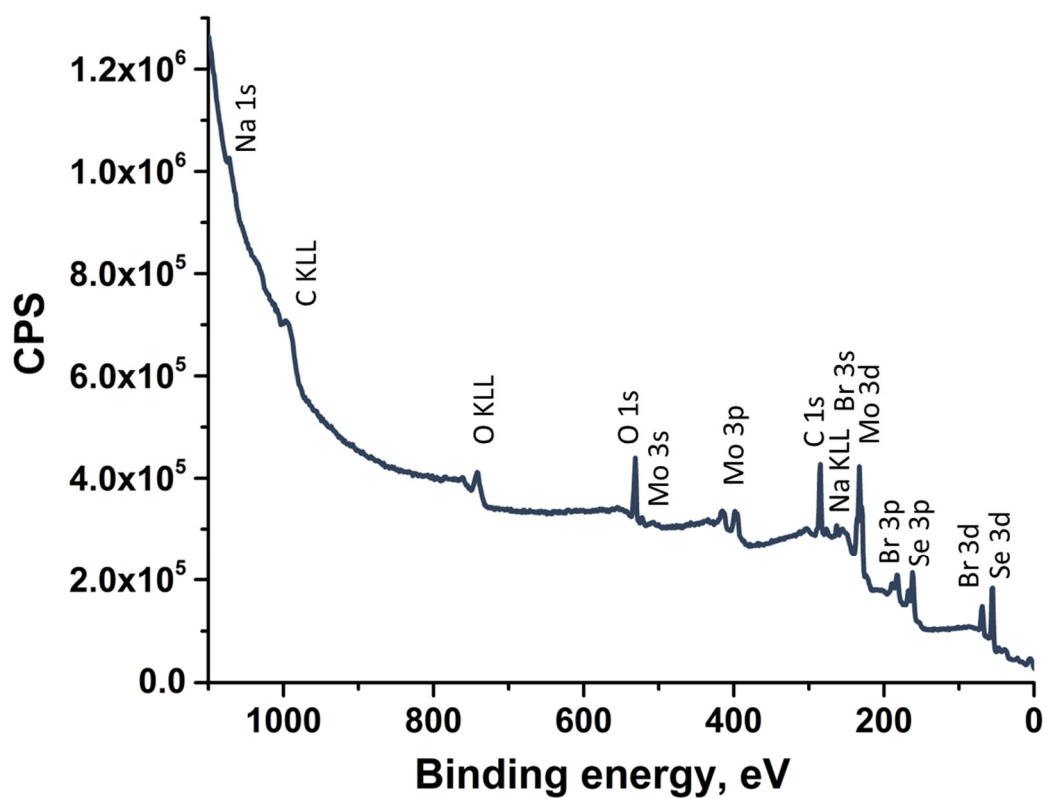

Figure S13. XPS survey spectrum of **Mo<sub>6</sub>**.

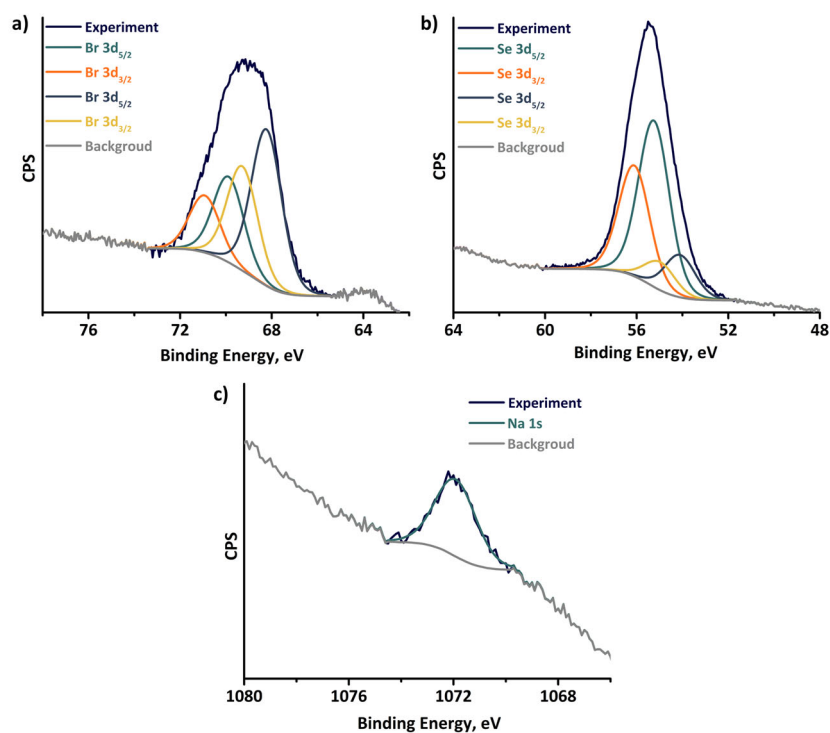

Figure S14. XPS spectra showing Br 3d (a), Se 3d (b) and Na 1s (c) core level of **Mo<sub>6</sub>**.

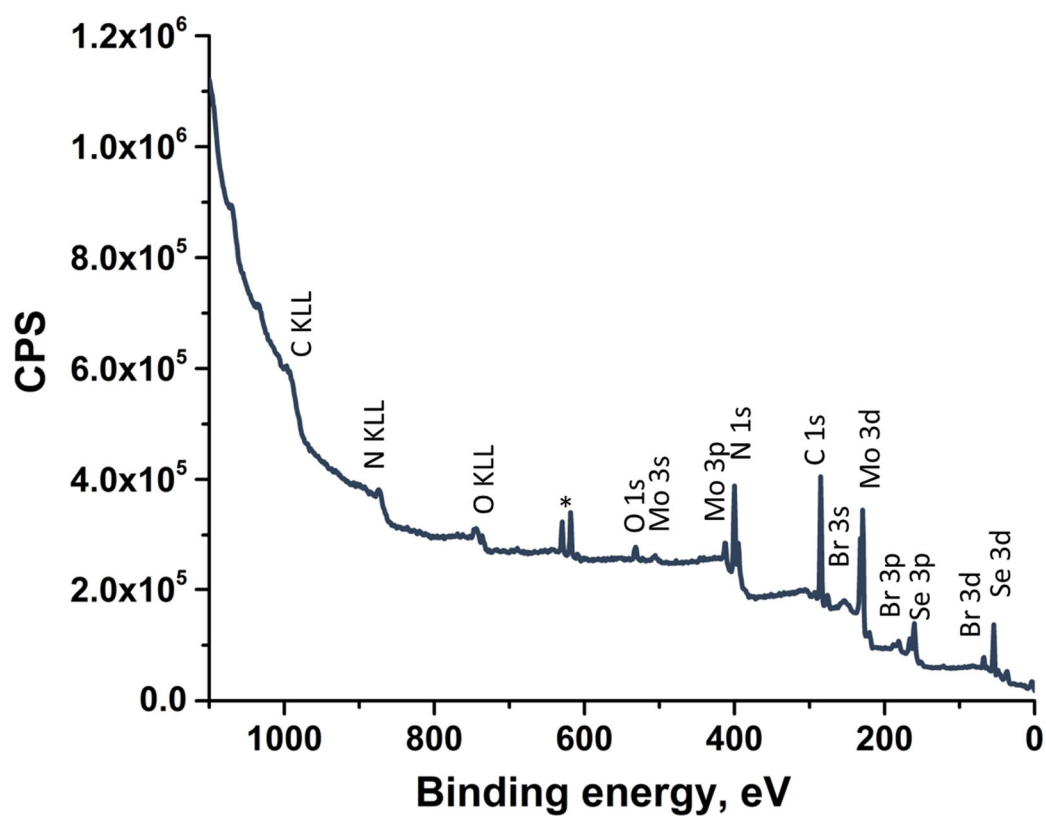

Figure S15. XPS survey spectrum of **Mo<sub>5</sub>red**.

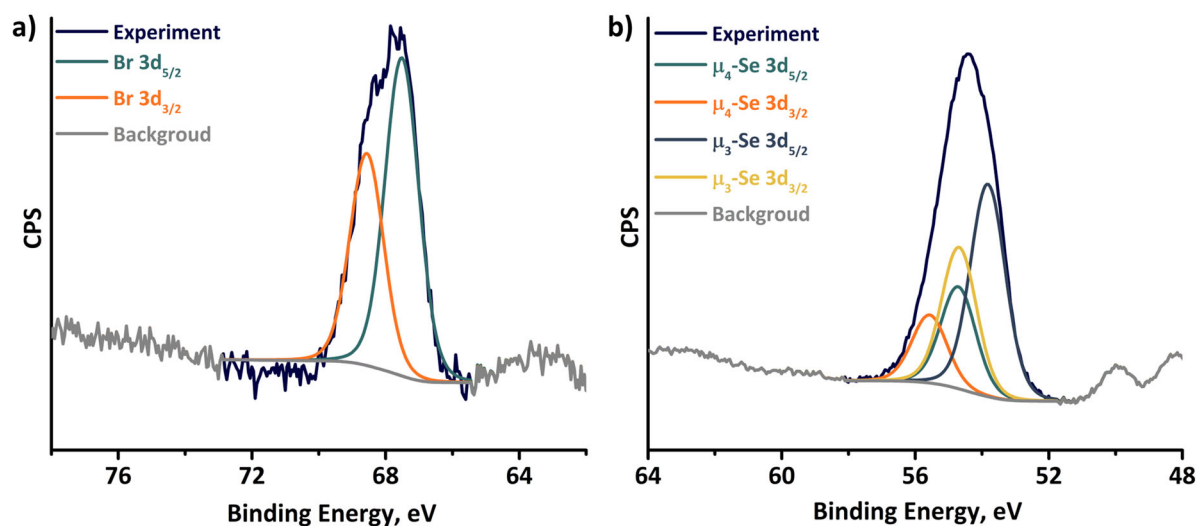

Figure S16. XPS spectra showing Br 3d (a) and Se 3d (b) core level of **Mo<sub>5</sub>red**.

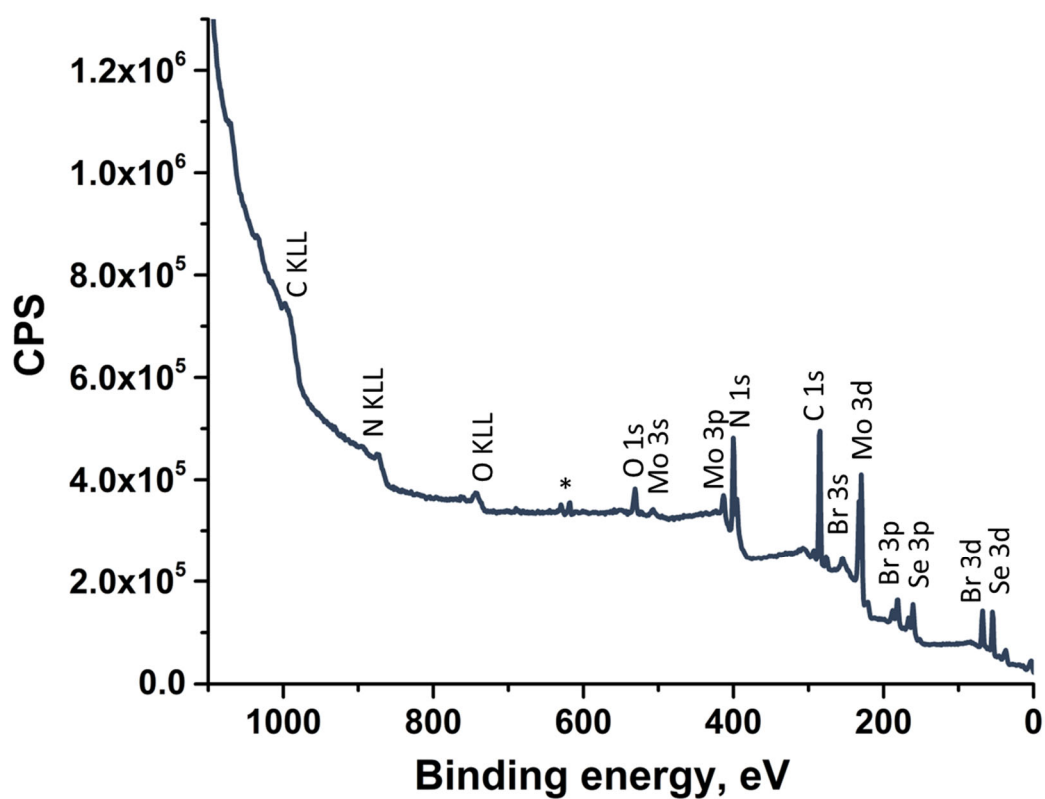

Figure S17. XPS survey spectrum of **Mo<sub>5</sub>ox**.

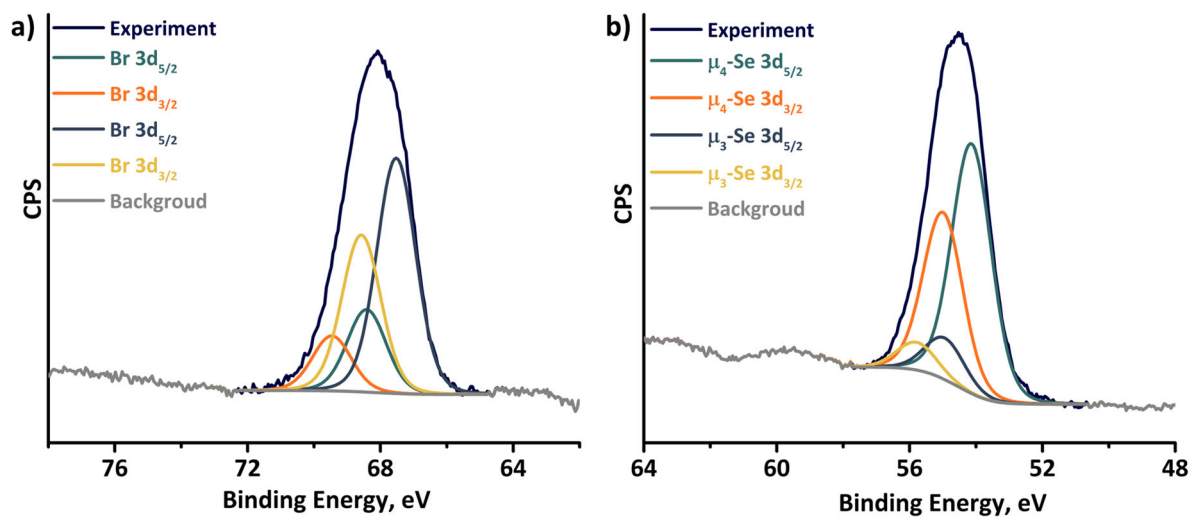

Figure S18. XPS spectra showing Br 3d (a) and Se 3d (b) core level of **Mo<sub>5</sub>ox**.



**Table S3.** XPS binding energies (eV) in clusters obtained.

| <b>Compound</b>                  | <b>Mo3d<sub>5/2,3/2</sub> (%)</b>                          | <b>Br3d<sub>5/2,3/2</sub> (%)</b>                     | <b>Se3d<sub>5/2,3/2</sub> (%)</b>  | <b>Na1s</b> |
|----------------------------------|------------------------------------------------------------|-------------------------------------------------------|------------------------------------|-------------|
| Mo <sub>6</sub> Br <sub>12</sub> | 229.8–232.9 (100%)                                         | 68.4-69.5 (19%)<br>69.4-70.5 (19%)<br>70.7-71.7 (62%) | –                                  | –           |
| Mo <sub>6</sub>                  | 229.2–232.4 (54%)<br>232.8–236.0 (46%)                     | 68.2-69.3 (65%)<br>69.9-70.9 (35%)                    | 54.1-55.0 (19%)<br>55.3-56.1 (81%) | 1071.9      |
| Mo <sub>5</sub> red              | 228.9–232.1 (95%)<br>231.7–234.8 (4%)<br>233.3–236.4 (1%)  | 67.5-68.6                                             | 53.8-54.7 (66%)<br>54.7-55.6 (34%) | –           |
| Mo <sub>5</sub> ox               | 229.3–232.4 (78%)<br>230.7–233.9 (20%)<br>232.1–235.2 (2%) | 67.5-68.6 (74%)<br>68.4-69.5 (26%)                    | 54.1-55.0 (86%)<br>54.9-55.8 (14%) | –           |

## NMR spectroscopy data

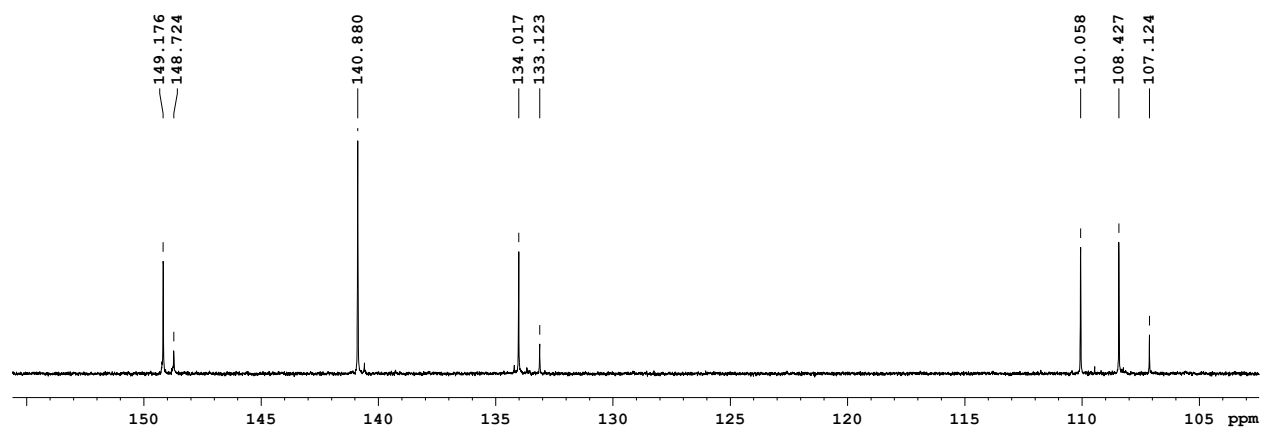

Figure S19.  $^{13}\text{C}$  NMR spectrum of  $\text{Mo}_5\text{ox}$  in  $\text{CD}_3\text{OD}$ .

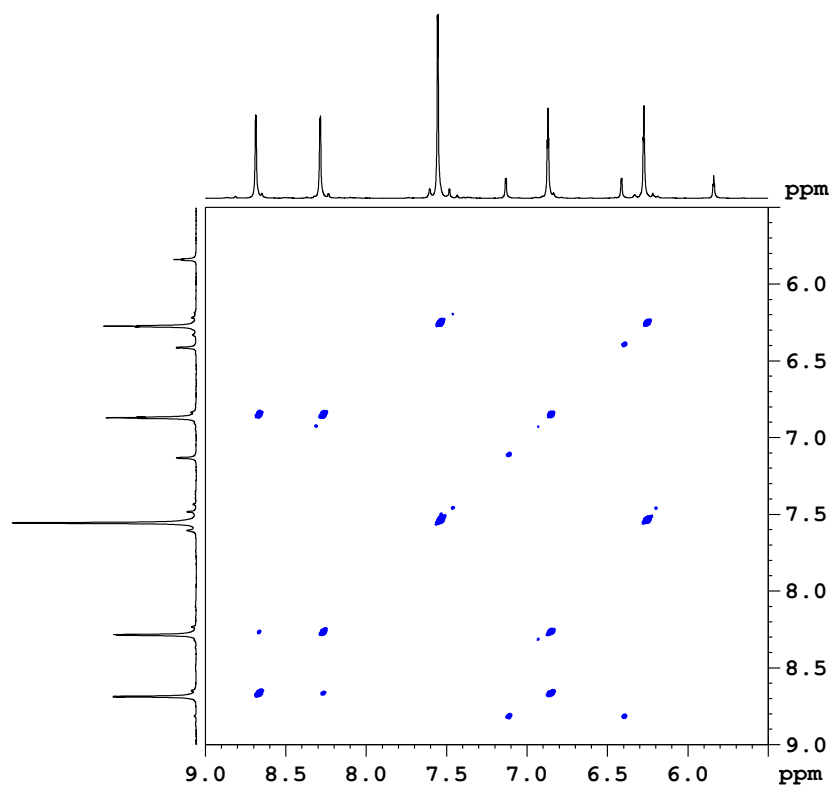

Figure S20.  $^1\text{H}$ ,  $^1\text{H}$ -NMR correlation spectra of  $\text{Mo}_5\text{ox}$  in  $\text{CD}_3\text{OD}$ .

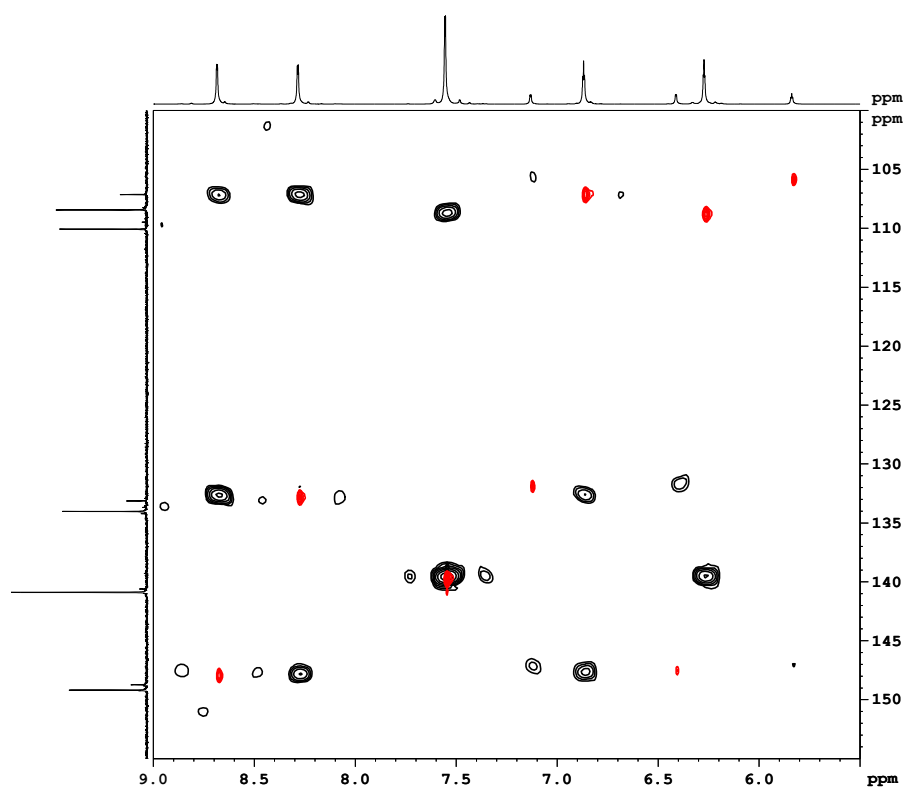

**Figure S21.**  $^1\text{H}$ ,  $^{13}\text{C}$ -NMR correlation spectra (HMBC – black, HSQC – red) of  $\text{Mo}_5\text{ox}$  in  $\text{CD}_3\text{OD}$ .

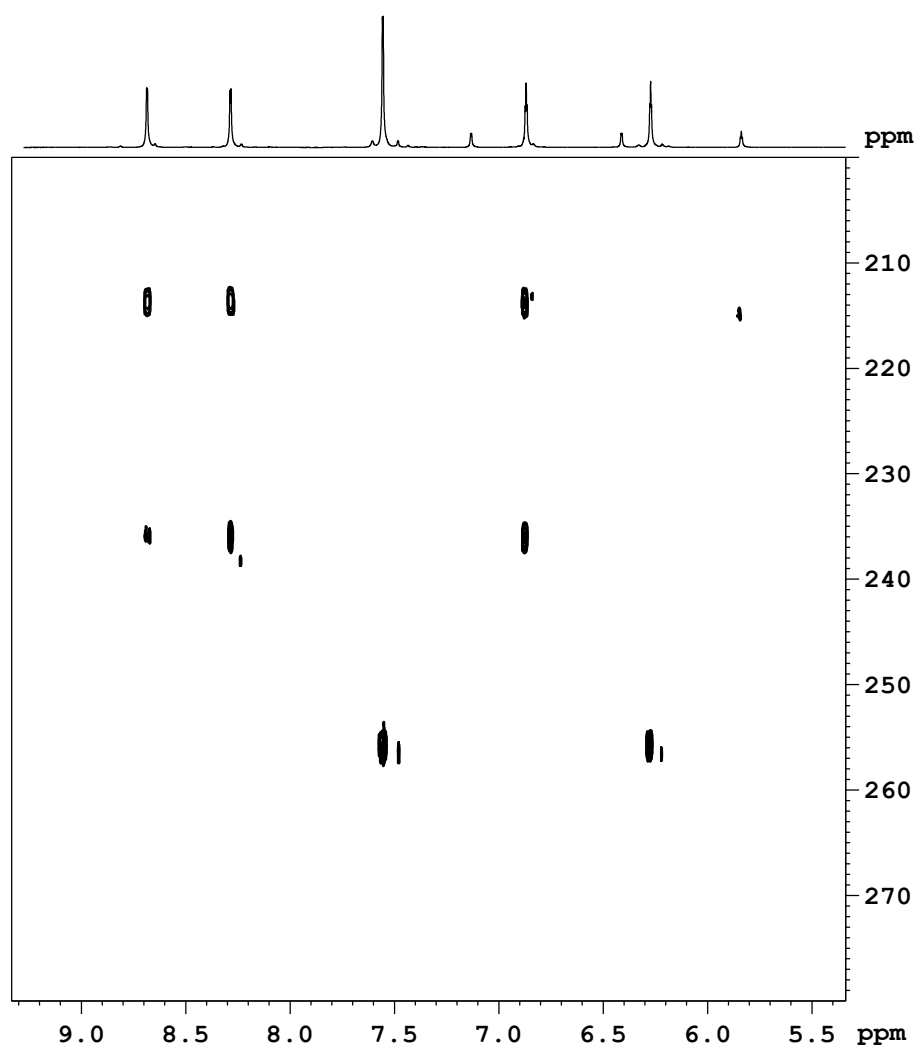

**Figure S22.**  $^1\text{H}$ ,  $^{15}\text{N}$ -NMR HMBC spectrum of  $\text{Mo}_5\text{ox}$  in  $\text{CD}_3\text{OD}$ .

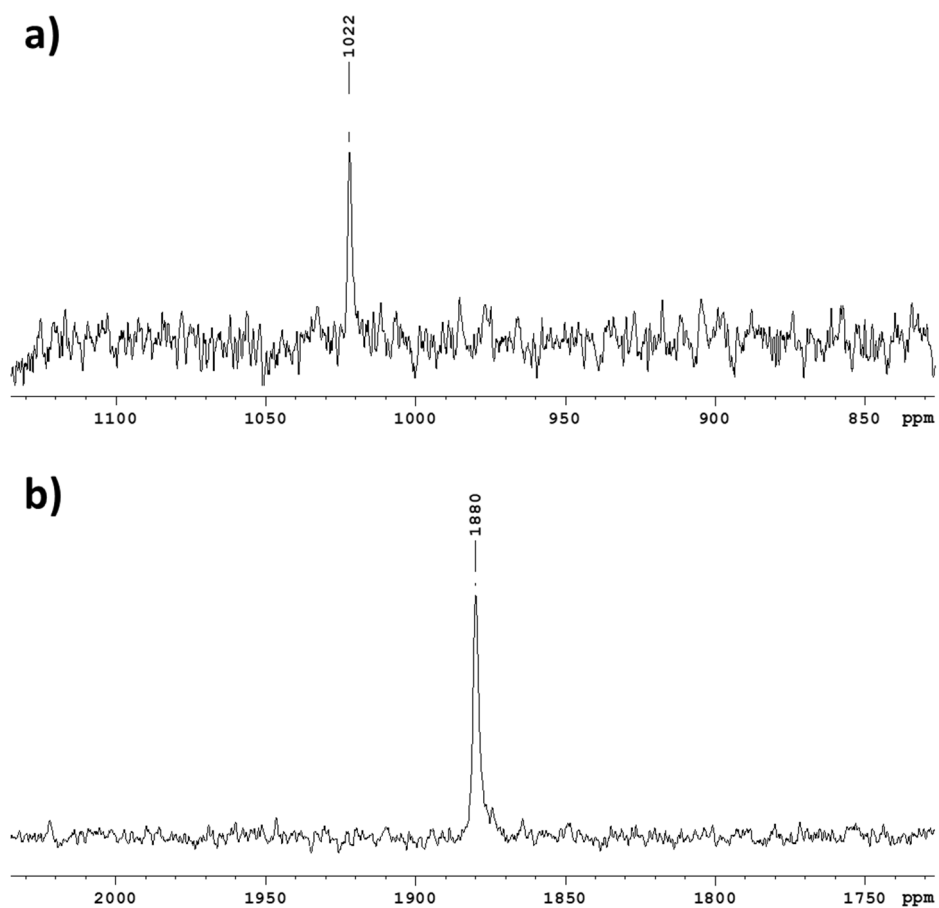

**Figure S23.**  $^{77}\text{Se}$  NMR spectra of **Mo<sub>5</sub>ox** in  $\text{CD}_3\text{OD}$

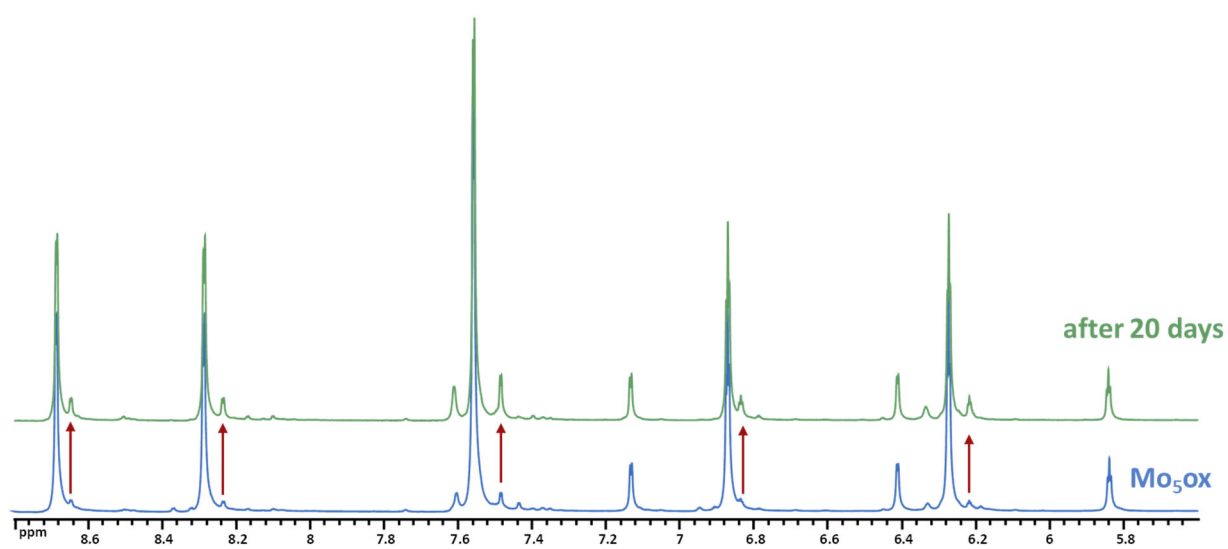

**Figure S24.**  $^1\text{H}$  NMR spectra of **Mo<sub>5</sub>ox** in  $\text{CD}_3\text{OD}$  in time. Red arrows indicate appearance of new signals of equatorial pyrazole and inner pyrazolate ligands.

## Mass-spectrometry data

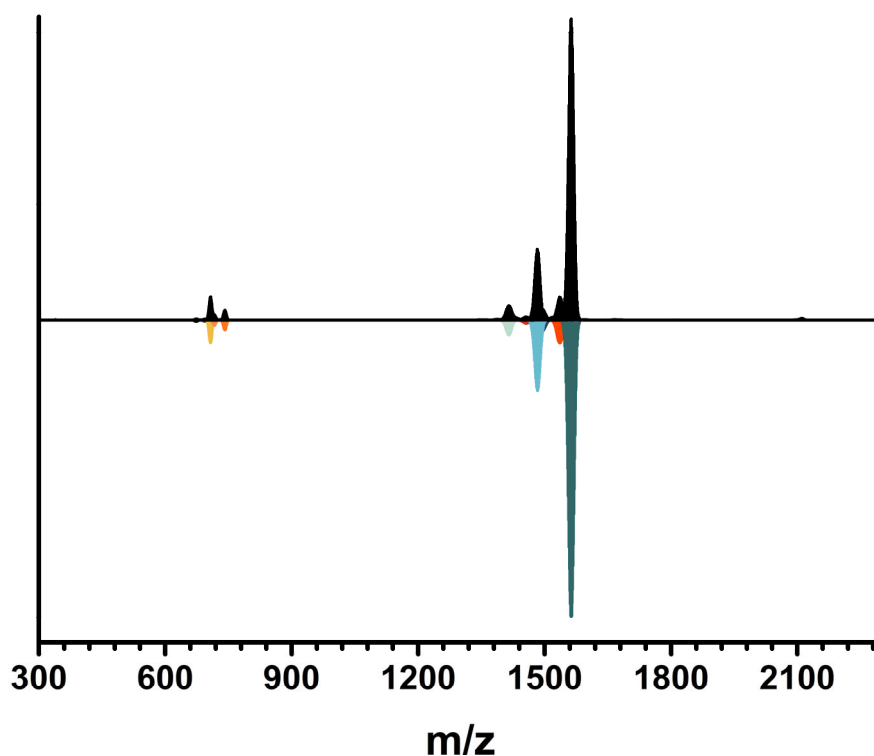

**Figure S25.** HR-ESI-MS spectrum of solution of **Mo<sub>5</sub>Ox** in acetonitrile (black) and simulations of cluster forms (colored).

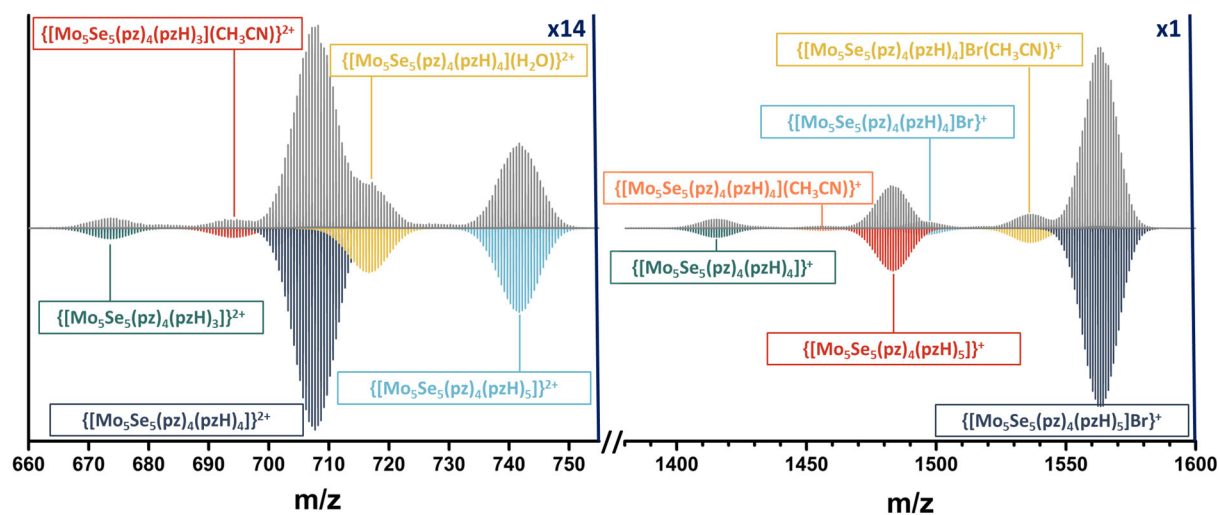

**Figure S26.** Fragment of HR-ESI-MS spectrum of solution of **Mo<sub>5</sub>Ox** in acetonitrile (gray) and simulations of cluster forms (colored).

## EPR spectroscopy data

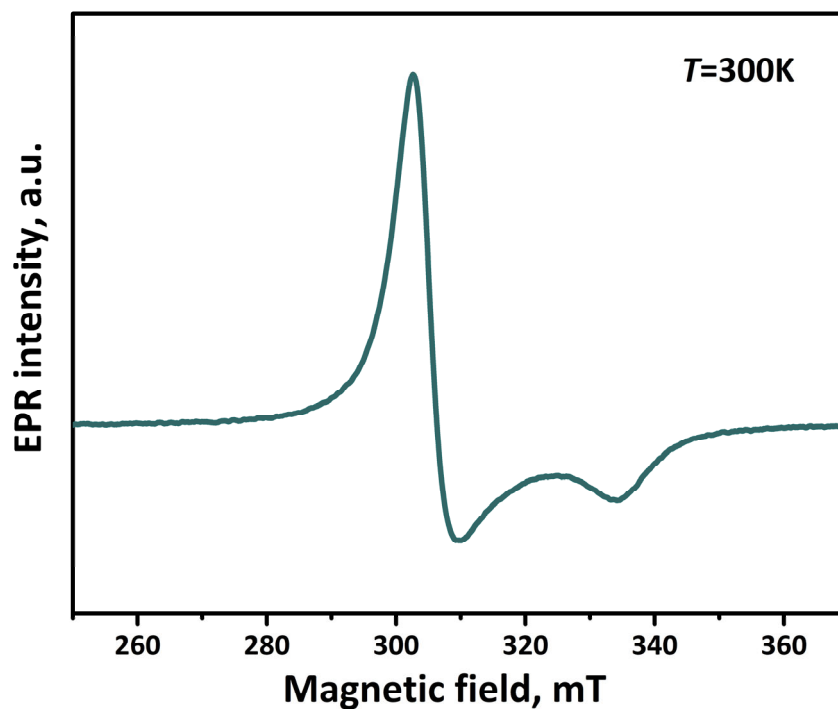

**Figure S27.** EPR spectrum of **Mo<sub>5</sub>red** at 300 K. The  $g$ -tensor values are evaluated to be  $g_{xx} = g_{yy} = 2.19$  and  $g_{zz} = 1.99$  ( $g_{iso} = 2.12$ ) changing slightly with temperature.

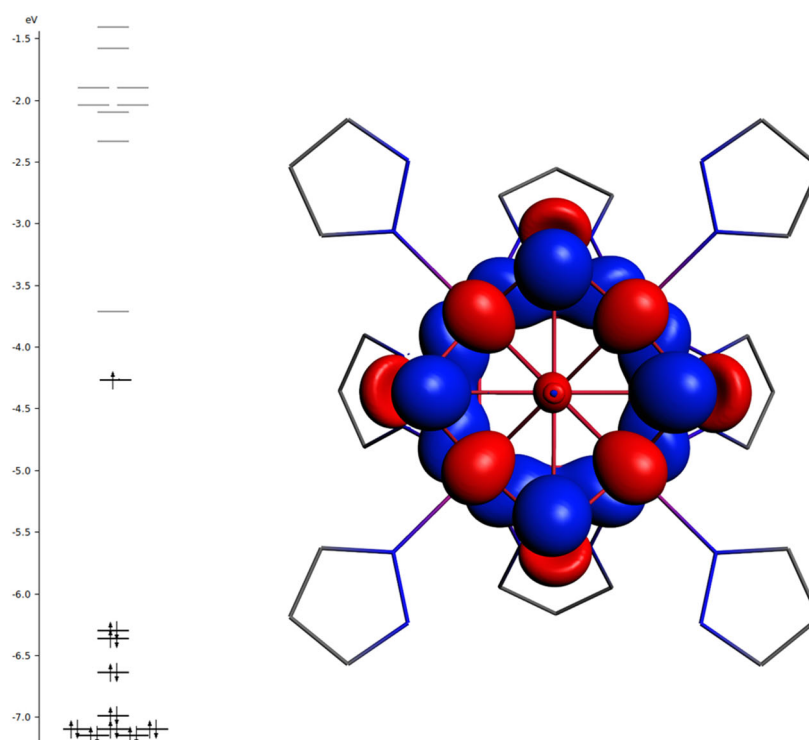

**Figure S28.** The HOMO orbital of the  $[\{\text{Mo}_5(\mu_3\text{-Se})_4(\mu_4\text{-Se})(\mu\text{-pz})_4\}(\text{pzH})_5]^+$  cation. The hydrogen atoms are omitted for clarity, the isosurface value is 0.035, view along the [001].

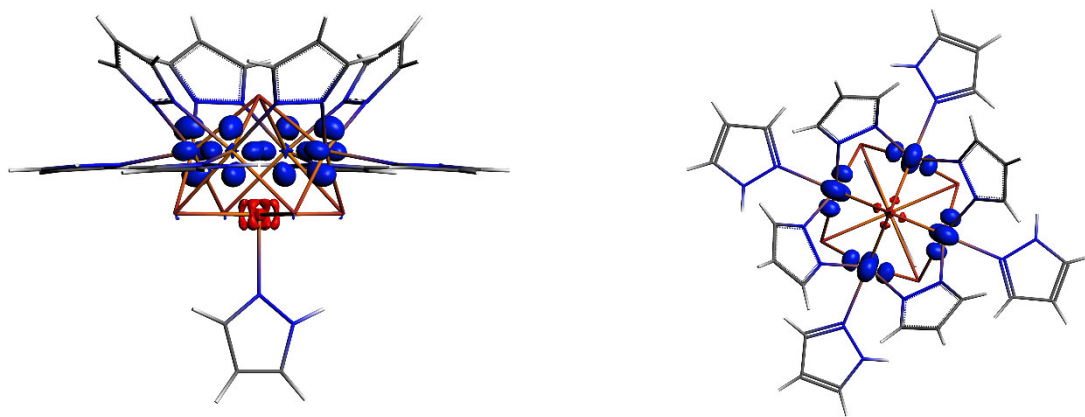

**Figure S29.** The plot of the spin density in the  $[\{\text{Mo}_5(\mu_3\text{-Se})_4(\mu_4\text{-Se})(\mu\text{-pz})_4\}(\text{pzH})_5]^+$  cation. The isosurface value 0.01, view along the [100] (left) and [001] (right). The spin density distribution in general corresponds to the *d*-orbitals of the basal Mo atoms.



## Cyclic voltammetry data

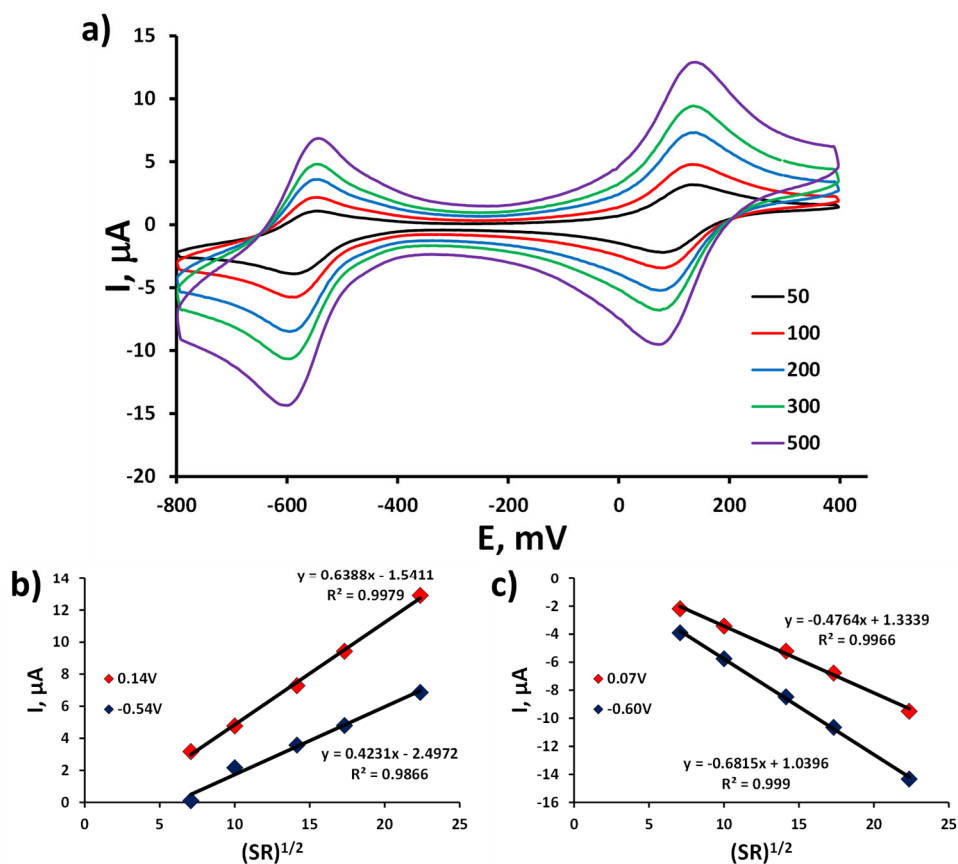

**Figure S30.** Cyclic voltammetry of the **Mo<sub>5</sub>red** (0.5 mM) in 0.1 M Bu<sub>4</sub>NClO<sub>4</sub> acetonitrile solution at different scan rates (a). Linear dependence of the anodic (b) and cathodic (c) peak current upon square root of the potential scan rate  $\sqrt{SR}$ ;

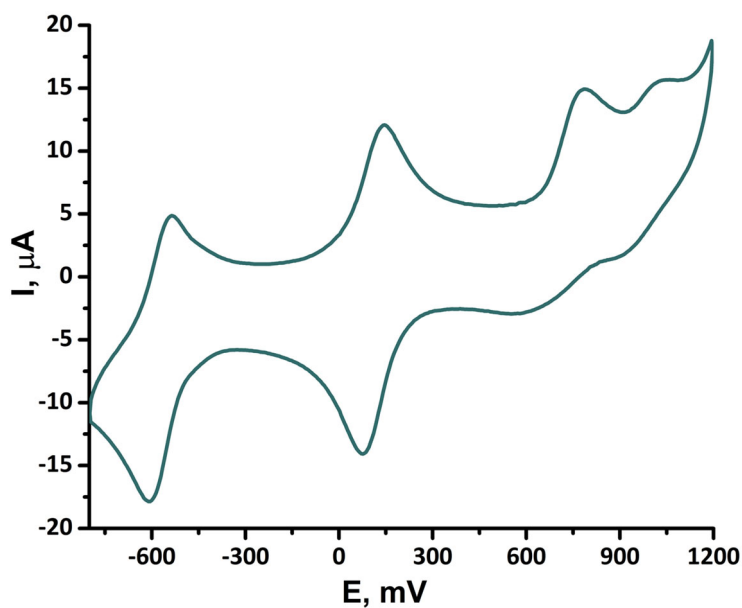

**Figure S31.** Cyclic voltammetry of the **Mo<sub>5</sub>red** (0.5 mM) in 0.1 M Bu<sub>4</sub>NClO<sub>4</sub> acetonitrile solution.

## Characterization of compounds: IR spectra, TGA curves, UV-vis spectra and PXRD data

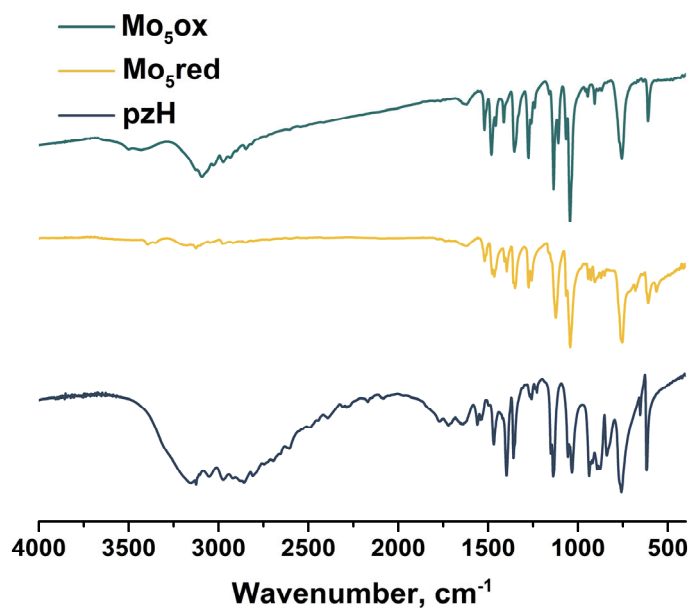

Figure S32. FTIR spectra of  $\text{Mo}_5\text{red}$  and  $\text{Mo}_5\text{ox}$  in comparison with pyrazole.

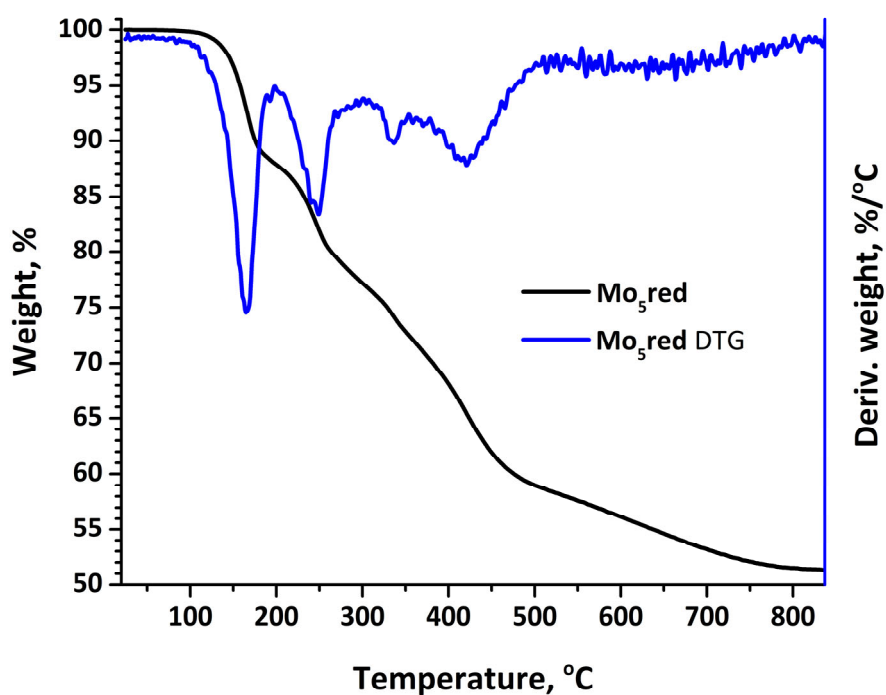

Figure S33. TGA and DTG curves of  $\text{Mo}_5\text{red}$ . Heating rates of  $10^{\circ}\text{C}\cdot\text{min}^{-1}$ .

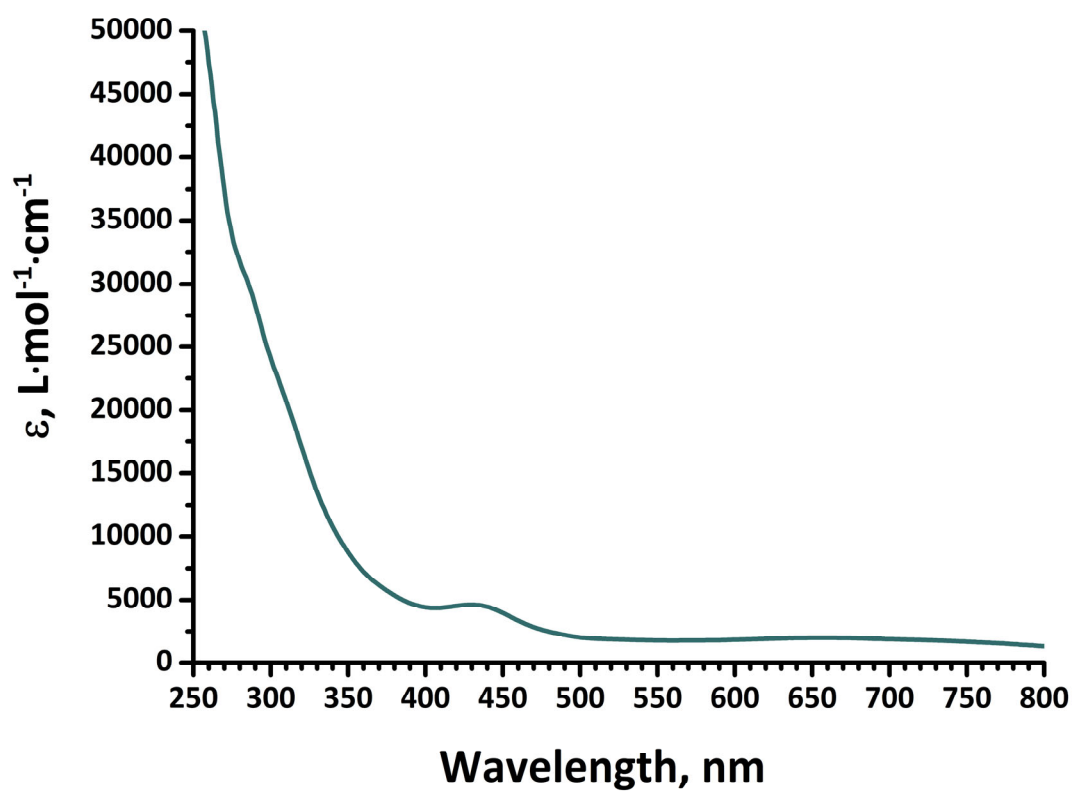

**Figure S34.** UV-vis spectrum of **Mo<sub>5</sub>red** acetonitrile solution.

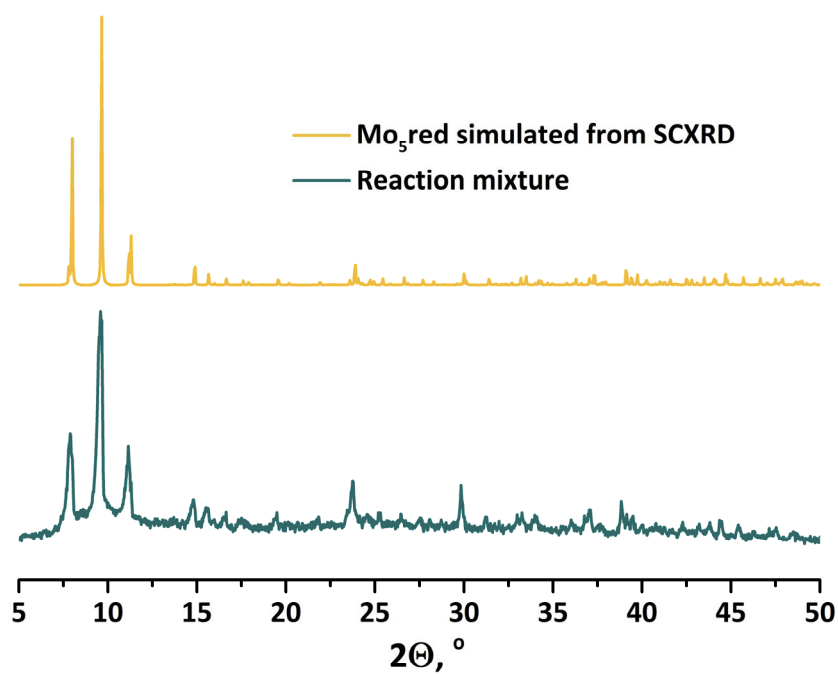

**Figure S35.** XRPD pattern of reaction mixture in comparison with calculated one from the SCXRD data for **Mo<sub>5</sub>red**.

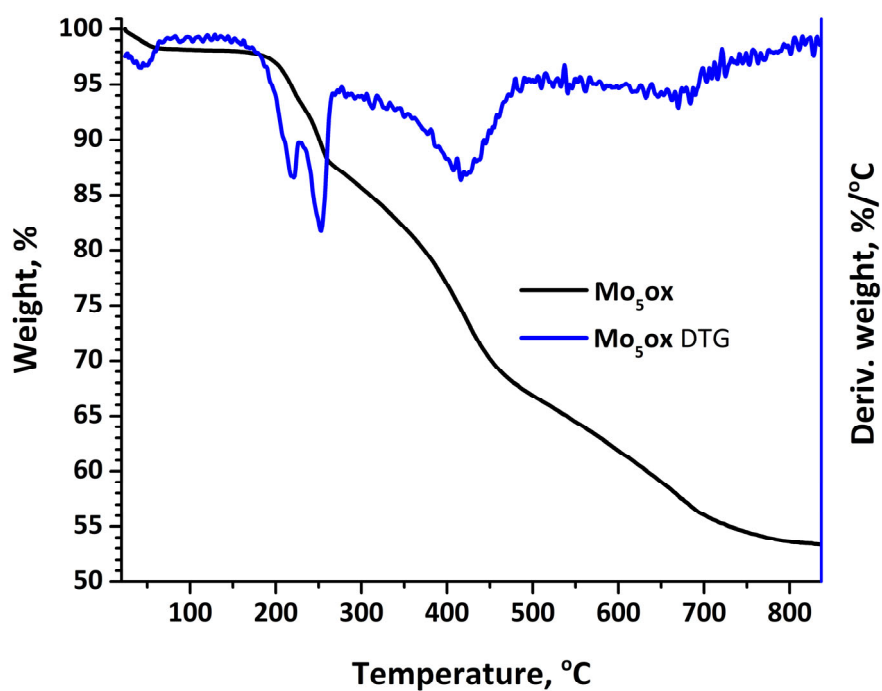

Figure S36. TGA and DTG curves of  $\text{Mo}_5\text{ox}$ . Heating rates of  $10\text{ }^{\circ}\text{C}\cdot\text{min}^{-1}$ .

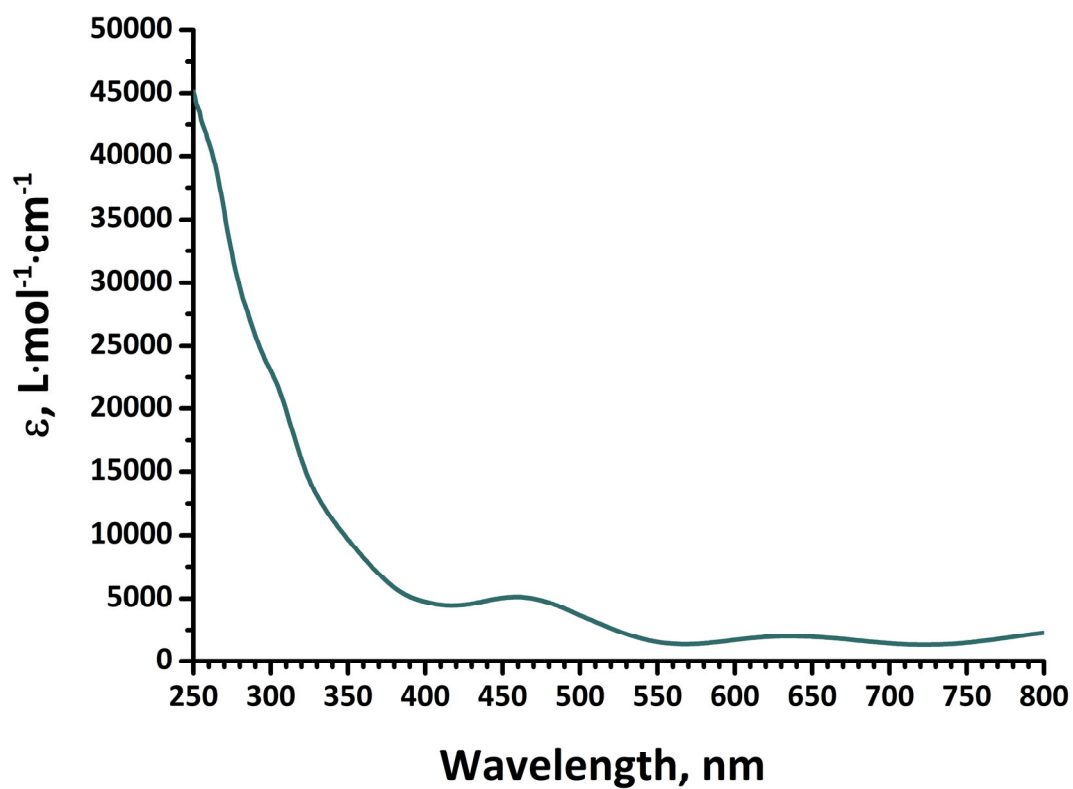

Figure S37. UV-vis spectrum of  $\text{Mo}_5\text{ox}$  acetonitrile solution.

## Crystal structure data

**Table S4.** Selected crystallographic parameters of the single-crystal X-ray diffraction structural analysis for  $[\{\text{Mo}_5(\mu_3\text{-Se})^i_4(\mu_4\text{-Se})^i(\mu\text{-pz})^i_4\}(\text{pzH})^a_5]\text{Br} \cdot 4\text{pzH}$  (**Mo<sub>5</sub>red**),  $[\{\text{Mo}_5(\mu_3\text{-Se})^i_4(\mu_4\text{-Se})^i(\mu\text{-pz})^i_4\}(\text{pzH})^a_5]\text{Br}_2 \cdot 2\text{H}_2\text{O}$  (**Mo<sub>5</sub>ox**).

| Compound                                                                            | <b>Mo<sub>5</sub>red</b>                                          | <b>Mo<sub>5</sub>ox</b>                                                              |
|-------------------------------------------------------------------------------------|-------------------------------------------------------------------|--------------------------------------------------------------------------------------|
| Empirical formula                                                                   | $\text{C}_{39}\text{H}_{48}\text{BrMo}_5\text{N}_{26}\text{Se}_5$ | $\text{C}_{27}\text{H}_{36}\text{Br}_2\text{Mo}_5\text{N}_{18}\text{O}_2\text{Se}_5$ |
| Formula weight                                                                      | 1835.44                                                           | 1679.06                                                                              |
| Temperature, K                                                                      | 150(2)                                                            | 150(2)                                                                               |
| Crystal system                                                                      | Tetragonal                                                        | Orthorhombic                                                                         |
| Space group                                                                         | $P4/n$                                                            | $C222_1$                                                                             |
| $a$ , Å                                                                             | 15.6443(4)                                                        | 15.6320(10)                                                                          |
| $b$ , Å                                                                             | 15.6443(4)                                                        | 25.5634(15)                                                                          |
| $c$ , Å                                                                             | 11.3058(2)                                                        | 12.2766(8)                                                                           |
| $\alpha$ , °                                                                        | 90                                                                | 90                                                                                   |
| $\beta$ , °                                                                         | 90                                                                | 90                                                                                   |
| $\gamma$ , °                                                                        | 90                                                                | 90                                                                                   |
| $V$ , Å <sup>3</sup>                                                                | 2767.03(15)                                                       | 4905.8(5)                                                                            |
| $Z$                                                                                 | 2                                                                 | 4                                                                                    |
| $\rho_{\text{calc}}$ , g/cm <sup>3</sup>                                            | 2.203                                                             | 2.273                                                                                |
| $\mu$ , mm <sup>-1</sup>                                                            | 5.171                                                             | 6.629                                                                                |
| $F(000)$                                                                            | 1758                                                              | 3160                                                                                 |
| Crystal size                                                                        | $0.22 \times 0.15 \times 0.12$                                    | $0.21 \times 0.15 \times 0.12$                                                       |
| $2\theta$ range for data collection, °                                              | 1.801 to 28.298                                                   | 2.255 to 27.256                                                                      |
|                                                                                     | $-20 \leq h \leq 19$                                              | $-18 \leq h \leq 20$                                                                 |
| Index ranges                                                                        | $-20 \leq k \leq 20$                                              | $-32 \leq k \leq 32$                                                                 |
|                                                                                     | $-15 \leq l \leq 9$                                               | $-15 \leq l \leq 15$                                                                 |
| Reflections collected                                                               | 21000                                                             | 20573                                                                                |
| Independent reflections                                                             | 3441 [ $R_{\text{int}} = 0.0251$ ]                                | 5450 [ $R_{\text{int}} = 0.0433$ ]                                                   |
| Data/restraints/parameters                                                          | 3441/0/183                                                        | 5450/12/293                                                                          |
| Goodness-of-fit on $F^2$                                                            | 1.053                                                             | 1.064                                                                                |
| $R_1 / wR_2(I > 2\sigma(I))$                                                        | 0.0197/0.0493                                                     | 0.0331/0.0814                                                                        |
| $R_1 / wR_2$ (all data)                                                             | 0.0233/0.0506                                                     | 0.0462/0.0852                                                                        |
| $\Delta\rho_{\text{max}}/\Delta\rho_{\text{min}}$ (e <sup>-</sup> Å <sup>-3</sup> ) | 1.282/-1.362                                                      | 0.913/-0.715                                                                         |
