# Supplementary material for: Unusual Square Pyramidal Chalcogenide Mo5 Cluster with Bridging Pyrazolate-Ligands
Source: Int J Mol Sci. 2023 Feb 8;24(4):3440. doi: 10.3390/ijms24043440 (PMC9962213; doi:10.3390/ijms24043440)
Supplement: Supplementary file 1 [file ijms-24-03440-s001.zip]

Archive with 5 entries (5 files):
- checkcif_Mo5ox.pdf
- checkcif_Mo5red.pdf
- ESI revised.pdf
- Mo5ox.cif
- Mo5red.cif
