# Supplementary material for: Unusual Square Pyramidal Chalcogenide Mo5 Cluster with Bridging Pyrazolate-Ligands
Source: Int J Mol Sci. 2023 Feb 8;24(4):3440. doi: 10.3390/ijms24043440 (PMC9962213; doi:10.3390/ijms24043440)
Supplement: Supplementary file 1 [file ijms-24-03440-s001.zip › Mo5ox.cif]

data_jul086
_publ_requested_journal          Inorg.Chem.
_publ_contact_author_name        'Dr. Michael A. Shestopalov'
_publ_contact_author_address     
;Nikolaev Institute of Inorganic Chemistry,
SB Russian Academy of Sciences,
Akad. Lavrentiev prospekt 3,
Novosibirsk 90,
630090 Russia
;
_publ_contact_author_email       shtopy@niic.nsc.ru
_publ_contact_author_phone       7(383)3309253
_publ_contact_author_fax         7(383)3309489
loop_
_publ_author_name
_publ_author_address
'Savina, Iulia V.'
;Nikolaev Institute of Inorganic Chemistry,
SB Russian Academy of Sciences,
Akad. Lavrentiev prospekt 3,
Novosibirsk 90,
630090 Russia
;
'Ivanov, Anton A.'
;Nikolaev Institute of Inorganic Chemistry,
SB Russian Academy of Sciences,
Akad. Lavrentiev prospekt 3,
Novosibirsk 90,
630090 Russia
;
'Evtushok, Darya V.'
;Nikolaev Institute of Inorganic Chemistry,
SB Russian Academy of Sciences,
Akad. Lavrentiev prospekt 3,
Novosibirsk 90,
630090 Russia
;
'Gayfulin, Yakov M.'
;Nikolaev Institute of Inorganic Chemistry,
SB Russian Academy of Sciences,
Akad. Lavrentiev prospekt 3,
Novosibirsk 90,
630090 Russia
;
'Komarovskikh, Andrey Y.'
;Nikolaev Institute of Inorganic Chemistry,
SB Russian Academy of Sciences,
Akad. Lavrentiev prospekt 3,
Novosibirsk 90,
630090 Russia
;
'Syrokvashin, Mikhail M.'
;Nikolaev Institute of Inorganic Chemistry,
SB Russian Academy of Sciences,
Akad. Lavrentiev prospekt 3,
Novosibirsk 90,
630090 Russia
;
'Ivanova, Mariia N.'
;Nikolaev Institute of Inorganic Chemistry,
SB Russian Academy of Sciences,
Akad. Lavrentiev prospekt 3,
Novosibirsk 90,
630090 Russia
;
'Asanov, Igor P.'
;Nikolaev Institute of Inorganic Chemistry,
SB Russian Academy of Sciences,
Akad. Lavrentiev prospekt 3,
Novosibirsk 90,
630090 Russia
;
'Eltsov, Ilia V.'
;Novosibirsk State University,
2 Pirogova Str., 
Novosibirsk,
630090 Russia
;
'Kuratieva, Natalia V.'
;Nikolaev Institute of Inorganic Chemistry,
SB Russian Academy of Sciences,
Akad. Lavrentiev prospekt 3,
Novosibirsk 90,
630090 Russia
;
'Shestopalov, Michael A.'
;Nikolaev Institute of Inorganic Chemistry,
SB Russian Academy of Sciences,
Akad. Lavrentiev prospekt 3,
Novosibirsk 90,
630090 Russia
;

_audit_creation_method           SHELXL-2017/1
_shelx_SHELXL_version_number     2017/1
_chemical_name_systematic        ?
_chemical_name_common            ?
_chemical_melting_point          ?
_chemical_formula_moiety         'C27 H32 Mo5 N18 Se5, 2(Br), 2(H2 O)'
_chemical_formula_sum            'C27 H36 Br2 Mo5 N18 O2 Se5'
_chemical_formula_weight         1679.06

loop_
_atom_type_symbol
_atom_type_description
_atom_type_scat_dispersion_real
_atom_type_scat_dispersion_imag
_atom_type_scat_source
C C 0.0033 0.0016 'International Tables Vol C Tables 4.2.6.8 and 6.1.1.4'
H H 0.0000 0.0000 'International Tables Vol C Tables 4.2.6.8 and 6.1.1.4'
N N 0.0061 0.0033 'International Tables Vol C Tables 4.2.6.8 and 6.1.1.4'
O O 0.0106 0.0060 'International Tables Vol C Tables 4.2.6.8 and 6.1.1.4'
Se Se -0.0929 2.2259 'International Tables Vol C Tables 4.2.6.8 and 6.1.1.4'
Br Br -0.2901 2.4595 'International Tables Vol C Tables 4.2.6.8 and 6.1.1.4'
Mo Mo -1.6832 0.6857 'International Tables Vol C Tables 4.2.6.8 and 6.1.1.4'

_space_group_crystal_system      orthorhombic
_space_group_IT_number           20
_space_group_name_H-M_alt        'C 2 2 21'
_space_group_name_Hall           'C 2c 2'

_shelx_space_group_comment       
;
The symmetry employed for this shelxl refinement is uniquely defined
by the following loop, which should always be used as a source of
symmetry information in preference to the above space-group names.
They are only intended as comments.
;

loop_
_space_group_symop_operation_xyz
'x, y, z'
'-x, -y, z+1/2'
'x, -y, -z'
'-x, y, -z+1/2'
'x+1/2, y+1/2, z'
'-x+1/2, -y+1/2, z+1/2'
'x+1/2, -y+1/2, -z'
'-x+1/2, y+1/2, -z+1/2'

_cell_length_a                   15.6320(10)
_cell_length_b                   25.5634(15)
_cell_length_c                   12.2766(8)
_cell_angle_alpha                90
_cell_angle_beta                 90
_cell_angle_gamma                90
_cell_volume                     4905.8(5)
_cell_formula_units_Z            4
_cell_measurement_temperature    150(2)
_cell_measurement_reflns_used    6489
_cell_measurement_theta_min      2.30
_cell_measurement_theta_max      27.07

_exptl_crystal_description       prism
_exptl_crystal_colour            black
_exptl_crystal_density_meas      ?
_exptl_crystal_density_method    ?
_exptl_crystal_density_diffrn    2.273
_exptl_crystal_F_000             3160
_exptl_transmission_factor_min   0.519
_exptl_transmission_factor_max   0.746
_exptl_crystal_size_max          0.210
_exptl_crystal_size_mid          0.150
_exptl_crystal_size_min          0.120
_exptl_absorpt_coefficient_mu    6.629
_shelx_estimated_absorpt_T_min   0.337
_shelx_estimated_absorpt_T_max   0.503

_exptl_absorpt_correction_type   multi-scan
_exptl_absorpt_correction_T_min  ?
_exptl_absorpt_correction_T_max  ?
_exptl_absorpt_process_details   'Bruker SADABS'
_exptl_absorpt_special_details   ?
_diffrn_ambient_temperature      150(2)


_diffrn_radiation_probe          x-ray
_diffrn_radiation_type           MoK\a
_diffrn_radiation_wavelength     0.71073
_diffrn_source                   ?
_diffrn_measurement_device_type  'Bruker Apex DUO CCD area-detector'
_diffrn_measurement_method       '\f scans'
_diffrn_detector_area_resol_mean 25
_diffrn_reflns_number            20573
_diffrn_reflns_av_unetI/netI     0.0446
_diffrn_reflns_av_R_equivalents  0.0433
_diffrn_reflns_limit_h_min       -18
_diffrn_reflns_limit_h_max       20
_diffrn_reflns_limit_k_min       -32
_diffrn_reflns_limit_k_max       32
_diffrn_reflns_limit_l_min       -15
_diffrn_reflns_limit_l_max       15
_diffrn_reflns_theta_min         2.255
_diffrn_reflns_theta_max         27.256
_diffrn_reflns_theta_full        25.250
_diffrn_measured_fraction_theta_max 0.993
_diffrn_measured_fraction_theta_full 0.998
_diffrn_reflns_Laue_measured_fraction_max 0.993
_diffrn_reflns_Laue_measured_fraction_full 0.998
_diffrn_reflns_point_group_measured_fraction_max 0.993
_diffrn_reflns_point_group_measured_fraction_full 0.999
_reflns_number_total             5450
_reflns_number_gt                4676
_reflns_threshold_expression     >2\s(I)
_reflns_Friedel_coverage         0.810
_reflns_Friedel_fraction_max     0.994
_reflns_Friedel_fraction_full    1.000

_reflns_special_details          
;
 Reflections were merged by SHELXL according to the crystal
 class for the calculation of statistics and refinement.
 
 _reflns_Friedel_fraction is defined as the number of unique
 Friedel pairs measured divided by the number that would be
 possible theoretically, ignoring centric projections and
 systematic absences.
;

_computing_data_collection       'Bruker APEX2'
_computing_cell_refinement       'Bruker SAINT'
_computing_data_reduction        'Bruker SAINT'
_computing_structure_solution    'Bruker SHELXTL'
_computing_structure_refinement  'Bruker SHELXTL'
_computing_molecular_graphics    'Bruker SHELXTL'
_computing_publication_material  'Bruker SHELXTL'
_refine_special_details          
;
 Refined as a 2-component inversion twin.
;
_refine_ls_structure_factor_coef Fsqd
_refine_ls_matrix_type           full
_refine_ls_weighting_scheme      calc
_refine_ls_weighting_details     
'w=1/[\s^2^(Fo^2^)+(0.0482P)^2^] where P=(Fo^2^+2Fc^2^)/3'

_atom_sites_solution_primary     direct
_atom_sites_solution_secondary   difmap
_atom_sites_solution_hydrogens   geom
_refine_ls_hydrogen_treatment    constr
_refine_ls_extinction_method     none
_refine_ls_extinction_coef       .
_refine_ls_abs_structure_details 
;
 Refined as an inversion twin.
;
_refine_ls_abs_structure_Flack   0.423(11)
_chemical_absolute_configuration ?
_refine_ls_number_reflns         5450
_refine_ls_number_parameters     293
_refine_ls_number_restraints     12
_refine_ls_R_factor_all          0.0462
_refine_ls_R_factor_gt           0.0331
_refine_ls_wR_factor_ref         0.0852
_refine_ls_wR_factor_gt          0.0814
_refine_ls_goodness_of_fit_ref   1.064
_refine_ls_restrained_S_all      1.065
_refine_ls_shift/su_max          0.001
_refine_ls_shift/su_mean         0.000

loop_
_atom_site_label
_atom_site_type_symbol
_atom_site_fract_x
_atom_site_fract_y
_atom_site_fract_z
_atom_site_U_iso_or_equiv
_atom_site_adp_type
_atom_site_occupancy
_atom_site_site_symmetry_order
_atom_site_calc_flag
_atom_site_refinement_flags_posn
_atom_site_refinement_flags_adp
_atom_site_refinement_flags_occupancy
_atom_site_disorder_assembly
_atom_site_disorder_group
Mo1 Mo 0.000000 0.28629(4) 0.250000 0.0188(2) Uani 1 2 d S T P . .
Br1 Br 0.12263(6) 0.16182(5) 0.59118(9) 0.0437(3) Uani 1 1 d . . . . .
Se1 Se 0.000000 0.41461(5) 0.250000 0.0197(3) Uani 1 2 d S T P . .
O1W O 0.4546(12) 0.4943(9) 0.0292(12) 0.075(6) Uani 0.5 1 d . . P A 1
Mo2 Mo 0.11548(4) 0.35440(3) 0.32548(5) 0.01877(16) Uani 1 1 d . . . . .
Se2 Se 0.05118(6) 0.28707(4) 0.44860(6) 0.0238(2) Uani 1 1 d . . . . .
Mo3 Mo 0.05910(4) 0.35387(3) 0.10344(5) 0.01902(16) Uani 1 1 d . . . . .
Se3 Se 0.15671(5) 0.28762(4) 0.18643(7) 0.0229(2) Uani 1 1 d . . . . .
N11 N 0.000000 0.1985(4) 0.250000 0.027(2) Uani 1 2 d S T P . .
N12 N 0.0397(17) 0.1709(9) 0.340(2) 0.028(4) Uani 0.5 1 d . U P . .
C15 C -0.027(2) 0.1641(12) 0.185(3) 0.028(4) Uani 0.5 1 d . . P . .
C14 C -0.0108(18) 0.1120(13) 0.2248(19) 0.033(9) Uani 0.5 1 d . . P . .
N21 N 0.2408(4) 0.3372(3) 0.4016(6) 0.0280(17) Uani 1 1 d . . . . .
N22 N 0.3153(5) 0.3349(3) 0.3452(7) 0.0306(18) Uani 1 1 d . . . . .
H22 H 0.319399 0.338070 0.274054 0.037 Uiso 1 1 calc R U . . .
C23 C 0.3818(6) 0.3272(4) 0.4120(10) 0.044(3) Uani 1 1 d . . . . .
H23 H 0.440127 0.325167 0.390849 0.052 Uiso 1 1 calc R U . . .
C24 C 0.3510(7) 0.3228(5) 0.5162(10) 0.051(3) Uani 1 1 d . . . . .
H24 H 0.382307 0.316502 0.581167 0.061 Uiso 1 1 calc R U . . .
C25 C 0.2620(7) 0.3298(5) 0.5044(9) 0.045(3) Uani 1 1 d . . . . .
H25 H 0.222332 0.329149 0.563086 0.054 Uiso 1 1 calc R U . . .
N31 N 0.1228(5) 0.3332(3) -0.0533(6) 0.0297(17) Uani 1 1 d . . . . .
N32 N 0.2078(5) 0.3291(3) -0.0651(6) 0.0323(18) Uani 1 1 d . . . . .
H32 H 0.245612 0.337406 -0.014863 0.039 Uiso 1 1 calc R U . . .
C33 C 0.2266(7) 0.3109(4) -0.1624(8) 0.041(3) Uani 1 1 d . . . . .
H33 H 0.282494 0.304765 -0.189948 0.050 Uiso 1 1 calc R U . . .
C34 C 0.1516(7) 0.3022(4) -0.2171(8) 0.043(3) Uani 1 1 d . . . . .
H34 H 0.144514 0.288563 -0.288558 0.052 Uiso 1 1 calc R U . . .
C35 C 0.0887(7) 0.3177(5) -0.1454(8) 0.044(3) Uani 1 1 d . . . . .
H35 H 0.029089 0.317133 -0.160497 0.053 Uiso 1 1 calc R U . . .
N41 N 0.1005(5) 0.4073(3) 0.4664(6) 0.0258(17) Uani 1 1 d . . . . .
N42 N 0.0157(5) 0.4067(3) 0.4971(6) 0.0280(18) Uani 1 1 d . . . . .
C43 C 0.0100(6) 0.4365(3) 0.5900(7) 0.030(2) Uani 1 1 d . . . . .
H43 H -0.040793 0.442990 0.630300 0.036 Uiso 1 1 calc R U . . .
C44 C 0.0891(7) 0.4552(4) 0.6144(8) 0.037(2) Uani 1 1 d . . . . .
H44 H 0.103522 0.476975 0.674294 0.045 Uiso 1 1 calc R U . . .
C45 C 0.1447(6) 0.4365(4) 0.5354(7) 0.029(2) Uani 1 1 d . . . . .
H45 H 0.204347 0.443475 0.531555 0.035 Uiso 1 1 calc R U . . .
N51 N 0.1914(4) 0.4091(3) 0.2309(6) 0.0214(15) Uani 1 1 d . . . . .
N52 N 0.1652(5) 0.4075(3) 0.1226(6) 0.0273(18) Uani 1 1 d . . . . .
C53 C 0.2080(6) 0.4454(4) 0.0700(8) 0.032(2) Uani 1 1 d . . . . .
H53 H 0.202352 0.453065 -0.005338 0.039 Uiso 1 1 calc R U . . .
C54 C 0.2613(7) 0.4715(4) 0.1410(9) 0.042(3) Uani 1 1 d . . . . .
H54 H 0.298073 0.500154 0.125433 0.050 Uiso 1 1 calc R U . . .
C55 C 0.2488(6) 0.4463(4) 0.2424(9) 0.032(2) Uani 1 1 d . . . . .
H55 H 0.277496 0.454775 0.308307 0.039 Uiso 1 1 calc R U . . .
C13 C 0.032(3) 0.1176(12) 0.318(3) 0.036(8) Uani 0.5 1 d . . P . .
O3W O 0.565(3) 0.485(2) 0.030(5) 0.118(13) Uani 0.25 1 d . . P B 3
O2W O 0.517(4) 0.460(2) 0.066(5) 0.118(13) Uani 0.25 1 d . U P C 2

loop_
_atom_site_aniso_label
_atom_site_aniso_U_11
_atom_site_aniso_U_22
_atom_site_aniso_U_33
_atom_site_aniso_U_23
_atom_site_aniso_U_13
_atom_site_aniso_U_12
Mo1 0.0141(5) 0.0251(5) 0.0173(5) 0.000 0.0008(4) 0.000
Br1 0.0206(5) 0.0694(8) 0.0411(6) 0.0100(5) -0.0060(4) 0.0033(5)
Se1 0.0167(6) 0.0257(6) 0.0166(6) 0.000 -0.0002(5) 0.000
O1W 0.084(13) 0.112(16) 0.030(12) 0.037(11) -0.032(9) -0.041(13)
Mo2 0.0133(3) 0.0270(4) 0.0161(3) 0.0031(3) -0.0004(3) -0.0008(3)
Se2 0.0198(4) 0.0321(5) 0.0194(4) 0.0061(4) -0.0001(4) -0.0017(4)
Mo3 0.0142(3) 0.0282(4) 0.0146(3) 0.0009(3) 0.0012(3) 0.0021(3)
Se3 0.0157(4) 0.0301(5) 0.0228(4) 0.0017(4) 0.0018(3) 0.0040(4)
N11 0.020(5) 0.036(6) 0.026(6) 0.000 -0.003(5) 0.000
N12 0.024(7) 0.022(5) 0.036(10) 0.010(6) -0.005(7) -0.001(6)
C15 0.024(7) 0.022(5) 0.036(10) 0.010(6) -0.005(7) -0.001(6)
C14 0.03(3) 0.039(12) 0.02(4) 0.001(11) -0.01(2) -0.002(13)
N21 0.013(4) 0.042(5) 0.029(4) 0.009(4) 0.000(3) -0.005(3)
N22 0.015(4) 0.043(5) 0.034(4) 0.004(4) -0.001(3) 0.001(4)
C23 0.017(5) 0.049(6) 0.065(8) 0.010(6) -0.012(5) 0.005(5)
C24 0.026(6) 0.077(8) 0.048(7) 0.029(6) -0.020(5) -0.008(6)
C25 0.031(6) 0.061(7) 0.043(6) 0.022(5) -0.015(5) -0.005(5)
N31 0.021(4) 0.046(5) 0.022(4) -0.001(3) 0.003(3) 0.007(4)
N32 0.024(4) 0.041(5) 0.031(4) -0.002(4) 0.003(4) -0.001(4)
C33 0.039(6) 0.059(7) 0.026(5) -0.010(5) 0.017(5) 0.007(5)
C34 0.045(7) 0.060(7) 0.024(5) -0.003(5) 0.017(5) 0.005(6)
C35 0.030(6) 0.078(8) 0.023(5) -0.001(5) 0.005(4) 0.014(6)
N41 0.020(4) 0.035(4) 0.022(4) 0.000(3) -0.006(3) -0.006(3)
N42 0.027(4) 0.037(4) 0.020(4) -0.004(3) 0.000(3) -0.006(4)
C43 0.033(5) 0.037(5) 0.019(4) -0.006(4) 0.003(4) -0.002(5)
C44 0.048(6) 0.037(6) 0.026(5) -0.008(4) -0.009(5) -0.011(5)
C45 0.027(5) 0.035(5) 0.025(5) 0.001(4) -0.007(4) -0.012(4)
N51 0.016(4) 0.028(4) 0.020(4) 0.003(3) 0.005(3) -0.001(3)
N52 0.018(4) 0.034(4) 0.030(4) 0.007(3) 0.005(3) 0.004(3)
C53 0.032(5) 0.034(5) 0.031(5) 0.011(4) 0.005(4) 0.002(4)
C54 0.040(6) 0.037(6) 0.047(7) 0.013(5) -0.007(5) -0.013(5)
C55 0.023(5) 0.038(5) 0.036(5) 0.003(5) 0.000(4) -0.004(4)
C13 0.04(2) 0.044(14) 0.03(2) -0.008(14) 0.005(15) -0.015(12)
O3W 0.127(16) 0.106(16) 0.122(16) -0.003(10) 0.010(11) 0.022(10)
O2W 0.127(16) 0.106(16) 0.122(16) -0.003(10) 0.010(11) 0.022(10)

_geom_special_details            
;
 All esds (except the esd in the dihedral angle between two l.s. planes)
 are estimated using the full covariance matrix.  The cell esds are taken
 into account individually in the estimation of esds in distances, angles
 and torsion angles; correlations between esds in cell parameters are only
 used when they are defined by crystal symmetry.  An approximate (isotropic)
 treatment of cell esds is used for estimating esds involving l.s. planes.
;

loop_
_geom_bond_atom_site_label_1
_geom_bond_atom_site_label_2
_geom_bond_distance
_geom_bond_site_symmetry_2
_geom_bond_publ_flag
Mo1 N11 2.245(11) . ?
Mo1 Se2 2.5661(8) . ?
Mo1 Se2 2.5661(8) 4 ?
Mo1 Se3 2.5712(8) 4 ?
Mo1 Se3 2.5712(8) . ?
Mo1 Mo3 2.6598(10) 4 ?
Mo1 Mo3 2.6599(10) . ?
Mo1 Mo2 2.6737(10) 4 ?
Mo1 Mo2 2.6737(10) . ?
Se1 Mo2 2.5467(10) 4 ?
Se1 Mo2 2.5468(10) . ?
Se1 Mo3 2.5497(10) . ?
Se1 Mo3 2.5497(10) 4 ?
O1W O1W 0.77(2) 3_565 ?
Mo2 N51 2.171(7) . ?
Mo2 N41 2.209(7) . ?
Mo2 N21 2.214(7) . ?
Mo2 Se3 2.4987(11) . ?
Mo2 Se2 2.5016(11) . ?
Mo2 Mo3 2.8648(10) . ?
Mo2 Mo3 2.8651(10) 4 ?
Se2 Mo3 2.5091(11) 4 ?
Mo3 N52 2.164(8) . ?
Mo3 N42 2.171(7) 4 ?
Mo3 N31 2.230(7) . ?
Mo3 Se3 2.4969(11) . ?
N11 C15 1.26(4) 4 ?
N11 C15 1.26(4) . ?
N11 N12 1.45(3) . ?
N11 N12 1.45(3) 4 ?
N12 C15 0.41(4) 4 ?
N12 C13 1.39(4) . ?
N12 C14 1.76(3) 4 ?
C15 C13 1.19(4) 4 ?
C15 C14 1.44(4) . ?
C15 C15 1.81(7) 4 ?
C15 C14 1.83(4) 4 ?
C14 C13 0.64(2) 4 ?
C14 C14 0.70(4) 4 ?
C14 C13 1.33(4) . ?
N21 C25 1.319(12) . ?
N21 N22 1.356(10) . ?
N22 C23 1.337(12) . ?
N22 H22 0.8800 . ?
C23 C24 1.372(16) . ?
C23 H23 0.9500 . ?
C24 C25 1.410(14) . ?
C24 H24 0.9500 . ?
C25 H25 0.9500 . ?
N31 C35 1.311(13) . ?
N31 N32 1.341(11) . ?
N32 C33 1.316(12) . ?
N32 H32 0.8800 . ?
C33 C34 1.369(15) . ?
C33 H33 0.9500 . ?
C34 C35 1.378(13) . ?
C34 H34 0.9500 . ?
C35 H35 0.9500 . ?
N41 C45 1.324(11) . ?
N41 N42 1.378(11) . ?
N42 C43 1.374(11) . ?
C43 C44 1.359(14) . ?
C43 H43 0.9500 . ?
C44 C45 1.387(13) . ?
C44 H44 0.9500 . ?
C45 H45 0.9500 . ?
N51 C55 1.314(11) . ?
N51 N52 1.393(10) . ?
N52 C53 1.342(11) . ?
C53 C54 1.379(14) . ?
C53 H53 0.9500 . ?
C54 C55 1.416(14) . ?
C54 H54 0.9500 . ?
C55 H55 0.9500 . ?
C13 C13 1.95(6) 4 ?
O3W O3W 1.08(10) 3_565 ?

loop_
_geom_angle_atom_site_label_1
_geom_angle_atom_site_label_2
_geom_angle_atom_site_label_3
_geom_angle
_geom_angle_site_symmetry_1
_geom_angle_site_symmetry_3
_geom_angle_publ_flag
N11 Mo1 Se2 90.44(3) . . ?
N11 Mo1 Se2 90.44(3) . 4 ?
Se2 Mo1 Se2 179.12(6) . 4 ?
N11 Mo1 Se3 90.76(3) . 4 ?
Se2 Mo1 Se3 90.49(3) . 4 ?
Se2 Mo1 Se3 89.50(3) 4 4 ?
N11 Mo1 Se3 90.76(3) . . ?
Se2 Mo1 Se3 89.50(3) . . ?
Se2 Mo1 Se3 90.49(3) 4 . ?
Se3 Mo1 Se3 178.48(6) 4 . ?
N11 Mo1 Mo3 130.50(2) . 4 ?
Se2 Mo1 Mo3 57.35(3) . 4 ?
Se2 Mo1 Mo3 121.97(4) 4 4 ?
Se3 Mo1 Mo3 56.99(3) 4 4 ?
Se3 Mo1 Mo3 121.84(4) . 4 ?
N11 Mo1 Mo3 130.50(2) . . ?
Se2 Mo1 Mo3 121.97(4) . . ?
Se2 Mo1 Mo3 57.35(3) 4 . ?
Se3 Mo1 Mo3 121.84(4) 4 . ?
Se3 Mo1 Mo3 56.99(3) . . ?
Mo3 Mo1 Mo3 98.99(4) 4 . ?
N11 Mo1 Mo2 130.63(2) . 4 ?
Se2 Mo1 Mo2 122.33(4) . 4 ?
Se2 Mo1 Mo2 56.99(3) 4 4 ?
Se3 Mo1 Mo2 56.86(3) 4 4 ?
Se3 Mo1 Mo2 121.97(4) . 4 ?
Mo3 Mo1 Mo2 64.98(3) 4 4 ?
Mo3 Mo1 Mo2 64.98(3) . 4 ?
N11 Mo1 Mo2 130.63(2) . . ?
Se2 Mo1 Mo2 56.99(3) . . ?
Se2 Mo1 Mo2 122.33(4) 4 . ?
Se3 Mo1 Mo2 121.97(4) 4 . ?
Se3 Mo1 Mo2 56.86(3) . . ?
Mo3 Mo1 Mo2 64.98(3) 4 . ?
Mo3 Mo1 Mo2 64.98(3) . . ?
Mo2 Mo1 Mo2 98.74(4) 4 . ?
Mo2 Se1 Mo2 105.64(5) 4 . ?
Mo2 Se1 Mo3 68.41(3) 4 . ?
Mo2 Se1 Mo3 68.41(3) . . ?
Mo2 Se1 Mo3 68.41(3) 4 4 ?
Mo2 Se1 Mo3 68.41(3) . 4 ?
Mo3 Se1 Mo3 104.98(5) . 4 ?
N51 Mo2 N41 94.7(3) . . ?
N51 Mo2 N21 82.5(3) . . ?
N41 Mo2 N21 83.4(3) . . ?
N51 Mo2 Se3 86.20(18) . . ?
N41 Mo2 Se3 168.8(2) . . ?
N21 Mo2 Se3 85.7(2) . . ?
N51 Mo2 Se2 170.45(19) . . ?
N41 Mo2 Se2 84.6(2) . . ?
N21 Mo2 Se2 87.95(19) . . ?
Se3 Mo2 Se2 92.66(4) . . ?
N51 Mo2 Se1 78.67(19) . . ?
N41 Mo2 Se1 80.78(19) . . ?
N21 Mo2 Se1 154.2(2) . . ?
Se3 Mo2 Se1 110.31(3) . . ?
Se2 Mo2 Se1 110.54(4) . . ?
N51 Mo2 Mo1 127.11(19) . . ?
N41 Mo2 Mo1 126.78(19) . . ?
N21 Mo2 Mo1 127.9(2) . . ?
Se3 Mo2 Mo1 59.50(3) . . ?
Se2 Mo2 Mo1 59.34(3) . . ?
Se1 Mo2 Mo1 77.81(3) . . ?
N51 Mo2 Mo3 70.27(19) . . ?
N41 Mo2 Mo3 135.7(2) . . ?
N21 Mo2 Mo3 132.3(2) . . ?
Se3 Mo2 Mo3 54.98(3) . . ?
Se2 Mo2 Mo3 116.62(4) . . ?
Se1 Mo2 Mo3 55.85(2) . . ?
Mo1 Mo2 Mo3 57.28(2) . . ?
N51 Mo2 Mo3 133.37(19) . 4 ?
N41 Mo2 Mo3 70.32(19) . 4 ?
N21 Mo2 Mo3 135.50(19) . 4 ?
Se3 Mo2 Mo3 116.78(3) . 4 ?
Se2 Mo2 Mo3 55.25(3) . 4 ?
Se1 Mo2 Mo3 55.84(2) . 4 ?
Mo1 Mo2 Mo3 57.27(2) . 4 ?
Mo3 Mo2 Mo3 89.81(3) . 4 ?
Mo2 Se2 Mo3 69.75(3) . 4 ?
Mo2 Se2 Mo1 63.67(3) . . ?
Mo3 Se2 Mo1 63.20(3) 4 . ?
N52 Mo3 N42 94.6(3) . 4 ?
N52 Mo3 N31 84.4(3) . . ?
N42 Mo3 N31 84.1(3) 4 . ?
N52 Mo3 Se3 85.2(2) . . ?
N42 Mo3 Se3 169.4(2) 4 . ?
N31 Mo3 Se3 85.3(2) . . ?
N52 Mo3 Se2 170.1(2) . 4 ?
N42 Mo3 Se2 84.7(2) 4 4 ?
N31 Mo3 Se2 85.7(2) . 4 ?
Se3 Mo3 Se2 93.56(4) . 4 ?
N52 Mo3 Se1 79.4(2) . . ?
N42 Mo3 Se1 80.1(2) 4 . ?
N31 Mo3 Se1 156.2(2) . . ?
Se3 Mo3 Se1 110.27(3) . . ?
Se2 Mo3 Se1 110.20(3) 4 . ?
N52 Mo3 Mo1 127.2(2) . . ?
N42 Mo3 Mo1 127.0(2) 4 . ?
N31 Mo3 Mo1 125.8(2) . . ?
Se3 Mo3 Mo1 59.72(3) . . ?
Se2 Mo3 Mo1 59.44(3) 4 . ?
Se1 Mo3 Mo1 78.01(3) . . ?
N52 Mo3 Mo2 70.0(2) . . ?
N42 Mo3 Mo2 134.7(2) 4 . ?
N31 Mo3 Mo2 133.2(2) . . ?
Se3 Mo3 Mo2 55.04(3) . . ?
Se2 Mo3 Mo2 117.18(3) 4 . ?
Se1 Mo3 Mo2 55.75(2) . . ?
Mo1 Mo3 Mo2 57.74(2) . . ?
N52 Mo3 Mo2 133.9(2) . 4 ?
N42 Mo3 Mo2 70.0(2) 4 4 ?
N31 Mo3 Mo2 133.5(2) . 4 ?
Se3 Mo3 Mo2 117.45(4) . 4 ?
Se2 Mo3 Mo2 55.00(3) 4 4 ?
Se1 Mo3 Mo2 55.74(2) . 4 ?
Mo1 Mo3 Mo2 57.74(2) . 4 ?
Mo2 Mo3 Mo2 90.19(3) . 4 ?
Mo3 Se3 Mo2 69.99(3) . . ?
Mo3 Se3 Mo1 63.29(3) . . ?
Mo2 Se3 Mo1 63.64(3) . . ?
C15 N11 C15 92(2) 4 . ?
C15 N11 N12 15.1(15) 4 . ?
C15 N11 N12 106.8(13) . . ?
C15 N11 N12 106.8(13) 4 4 ?
C15 N11 N12 15.1(15) . 4 ?
N12 N11 N12 121.9(17) . 4 ?
C15 N11 Mo1 134.1(11) 4 . ?
C15 N11 Mo1 134.1(11) . . ?
N12 N11 Mo1 119.1(9) . . ?
N12 N11 Mo1 119.1(9) 4 . ?
C15 N12 C13 53(8) 4 . ?
C15 N12 N11 54(8) 4 . ?
C13 N12 N11 106.8(19) . . ?
C15 N12 C14 34(8) 4 4 ?
C13 N12 C14 19.2(17) . 4 ?
N11 N12 C14 87.7(15) . 4 ?
N12 C15 C13 112(10) 4 4 ?
N12 C15 N11 111(9) 4 . ?
C13 C15 N11 137(3) 4 . ?
N12 C15 C14 137(10) 4 . ?
C13 C15 C14 25.9(17) 4 . ?
N11 C15 C14 112(2) . . ?
N12 C15 C15 154(9) 4 4 ?
C13 C15 C15 93(2) 4 4 ?
N11 C15 C15 44.1(11) . 4 ?
C14 C15 C15 67.5(18) . 4 ?
N12 C15 C14 158(10) 4 4 ?
C13 C15 C14 47(2) 4 4 ?
N11 C15 C14 90.8(19) . 4 ?
C14 C15 C14 20.8(13) . 4 ?
C15 C15 C14 46.7(14) 4 4 ?
C13 C14 C14 167(6) 4 4 ?
C13 C14 C13 161(8) 4 . ?
C14 C14 C13 6(3) 4 . ?
C13 C14 C15 55(5) 4 . ?
C14 C14 C15 112.5(18) 4 . ?
C13 C14 C15 106(4) . . ?
C13 C14 N12 46(5) 4 4 ?
C14 C14 N12 121.4(13) 4 4 ?
C13 C14 N12 115(3) . 4 ?
C15 C14 N12 9(2) . 4 ?
C13 C14 C15 120(6) 4 4 ?
C14 C14 C15 46.7(14) 4 4 ?
C13 C14 C15 41(2) . 4 ?
C15 C14 C15 66(3) . 4 ?
N12 C14 C15 74.7(14) 4 4 ?
C25 N21 N22 105.5(8) . . ?
C25 N21 Mo2 130.9(7) . . ?
N22 N21 Mo2 123.6(6) . . ?
C23 N22 N21 111.2(8) . . ?
C23 N22 H22 124.4 . . ?
N21 N22 H22 124.4 . . ?
N22 C23 C24 108.1(9) . . ?
N22 C23 H23 125.9 . . ?
C24 C23 H23 125.9 . . ?
C23 C24 C25 103.9(9) . . ?
C23 C24 H24 128.0 . . ?
C25 C24 H24 128.0 . . ?
N21 C25 C24 111.3(10) . . ?
N21 C25 H25 124.3 . . ?
C24 C25 H25 124.3 . . ?
C35 N31 N32 106.6(8) . . ?
C35 N31 Mo3 129.4(7) . . ?
N32 N31 Mo3 123.6(6) . . ?
C33 N32 N31 110.3(9) . . ?
C33 N32 H32 124.9 . . ?
N31 N32 H32 124.9 . . ?
N32 C33 C34 108.2(9) . . ?
N32 C33 H33 125.9 . . ?
C34 C33 H33 125.9 . . ?
C33 C34 C35 104.5(9) . . ?
C33 C34 H34 127.7 . . ?
C35 C34 H34 127.7 . . ?
N31 C35 C34 110.4(10) . . ?
N31 C35 H35 124.8 . . ?
C34 C35 H35 124.8 . . ?
C45 N41 N42 109.5(8) . . ?
C45 N41 Mo2 142.3(6) . . ?
N42 N41 Mo2 108.0(5) . . ?
C43 N42 N41 106.5(7) . . ?
C43 N42 Mo3 141.4(7) . 4 ?
N41 N42 Mo3 111.7(5) . 4 ?
C44 C43 N42 108.6(9) . . ?
C44 C43 H43 125.7 . . ?
N42 C43 H43 125.7 . . ?
C43 C44 C45 107.2(8) . . ?
C43 C44 H44 126.4 . . ?
C45 C44 H44 126.4 . . ?
N41 C45 C44 108.3(8) . . ?
N41 C45 H45 125.9 . . ?
C44 C45 H45 125.9 . . ?
C55 N51 N52 109.0(7) . . ?
C55 N51 Mo2 141.4(6) . . ?
N52 N51 Mo2 109.3(5) . . ?
C53 N52 N51 106.9(7) . . ?
C53 N52 Mo3 141.9(7) . . ?
N51 N52 Mo3 110.4(5) . . ?
N52 C53 C54 110.3(9) . . ?
N52 C53 H53 124.8 . . ?
C54 C53 H53 124.8 . . ?
C53 C54 C55 104.5(9) . . ?
C53 C54 H54 127.7 . . ?
C55 C54 H54 127.7 . . ?
N51 C55 C54 109.2(9) . . ?
N51 C55 H55 125.4 . . ?
C54 C55 H55 125.4 . . ?
C14 C13 C15 99(7) 4 4 ?
C14 C13 C14 7(3) 4 . ?
C15 C13 C14 93(4) 4 . ?
C14 C13 N12 115(6) 4 . ?
C15 C13 N12 16(3) 4 . ?
C14 C13 N12 108(4) . . ?
C14 C13 C13 13(6) 4 4 ?
C15 C13 C13 87(2) 4 4 ?
C14 C13 C13 6(3) . 4 ?
N12 C13 C13 102.2(16) . 4 ?

_refine_diff_density_max         0.973
_refine_diff_density_min         -0.715
_refine_diff_density_rms         0.155

_shelx_res_file                  
;
TITL jul086 in C222(1)
    D:\job\SHESTO~1\jul086\jul086.res
    created by SHELXL-2017/1 at 18:14:49 on 28-Apr-2020
CELL 0.71073 15.6320 25.5634 12.2766 90.000 90.000 90.000
ZERR 4.0000 0.0010 0.0015 0.0008 0.000 0.000 0.000
LATT -7
SYMM -X, -Y, 0.5+Z
SYMM X, -Y, -Z
SYMM -X, Y, 0.5-Z
SFAC C H N O SE BR MO
UNIT 108 144 72 8 20 8 20
MERG 2
OMIT 0 180
FMAP 2
GRID
PLAN 5
TEMP -123
SIZE 0.21 0.15 0.12
TWIN
ISOR 0.008 0.008 N12 O2W
EADP N12 C15
OMIT 0 2 0
EADP O2W O3W
OMIT 1 5 0
OMIT 2 2 0
OMIT 0 6 1
BOND $H
L.S. 10
ACTA 50.5
WGHT    0.048200
BASF   0.42343
FVAR       0.03397
MO1   7    0.000000    0.286293    0.250000    10.50000    0.01409    0.02506 =
         0.01730    0.00000    0.00084    0.00000
BR1   6    0.122629    0.161817    0.591178    11.00000    0.02064    0.06940 =
         0.04111    0.00997   -0.00603    0.00329
SE1   5    0.000000    0.414605    0.250000    10.50000    0.01672    0.02574 =
         0.01658    0.00000   -0.00024    0.00000
PART 1
O1W   4    0.454570    0.494290    0.029178    10.50000    0.08351    0.11219 =
         0.02968    0.03745   -0.03203   -0.04132
PART 0
MO2   7    0.115480    0.354401    0.325480    11.00000    0.01330    0.02696 =
         0.01606    0.00310   -0.00043   -0.00080
SE2   5    0.051176    0.287067    0.448602    11.00000    0.01979    0.03210 =
         0.01944    0.00609   -0.00012   -0.00173
MO3   7    0.059096    0.353873    0.103445    11.00000    0.01420    0.02821 =
         0.01465    0.00087    0.00122    0.00212
SE3   5    0.156710    0.287624    0.186427    11.00000    0.01567    0.03010 =
         0.02281    0.00174    0.00177    0.00397
N11   3    0.000000    0.198481    0.250000    10.50000    0.01994    0.03596 =
         0.02623    0.00000   -0.00316    0.00000
N12   3    0.039735    0.170867    0.340287    10.50000    0.02443    0.02216 =
         0.03621    0.01030   -0.00467   -0.00062
C15   1   -0.026844    0.164139    0.184728    10.50000    0.02443    0.02216 =
         0.03621    0.01030   -0.00467   -0.00062
C14   1   -0.010781    0.112012    0.224803    10.50000    0.03485    0.03943 =
         0.02482    0.00065   -0.01313   -0.00194
N21   3    0.240810    0.337232    0.401579    11.00000    0.01317    0.04231 =
         0.02863    0.00938   -0.00002   -0.00543
N22   3    0.315303    0.334917    0.345243    11.00000    0.01492    0.04320 =
         0.03361    0.00367   -0.00069    0.00080
AFIX  43
H22   2    0.319399    0.338070    0.274054    11.00000   -1.20000
AFIX   0
C23   1    0.381756    0.327217    0.411962    11.00000    0.01689    0.04888 =
         0.06502    0.00992   -0.01200    0.00486
AFIX  43
H23   2    0.440127    0.325167    0.390849    11.00000   -1.20000
AFIX   0
C24   1    0.350958    0.322795    0.516183    11.00000    0.02648    0.07685 =
         0.04819    0.02936   -0.02047   -0.00823
AFIX  43
H24   2    0.382307    0.316502    0.581167    11.00000   -1.20000
AFIX   0
C25   1    0.261974    0.329759    0.504447    11.00000    0.03121    0.06086 =
         0.04277    0.02231   -0.01454   -0.00465
AFIX  43
H25   2    0.222332    0.329149    0.563086    11.00000   -1.20000
AFIX   0
N31   3    0.122763    0.333181   -0.053322    11.00000    0.02113    0.04630 =
         0.02154   -0.00073    0.00329    0.00731
N32   3    0.207797    0.329090   -0.065062    11.00000    0.02438    0.04122 =
         0.03145   -0.00210    0.00315   -0.00067
AFIX  43
H32   2    0.245612    0.337406   -0.014863    11.00000   -1.20000
AFIX   0
C33   1    0.226581    0.310857   -0.162409    11.00000    0.03909    0.05933 =
         0.02561   -0.00955    0.01665    0.00698
AFIX  43
H33   2    0.282494    0.304765   -0.189948    11.00000   -1.20000
AFIX   0
C34   1    0.151593    0.302187   -0.217130    11.00000    0.04456    0.06014 =
         0.02434   -0.00275    0.01696    0.00504
AFIX  43
H34   2    0.144514    0.288563   -0.288558    11.00000   -1.20000
AFIX   0
C35   1    0.088686    0.317652   -0.145388    11.00000    0.03017    0.07820 =
         0.02341   -0.00130    0.00517    0.01390
AFIX  43
H35   2    0.029089    0.317133   -0.160497    11.00000   -1.20000
AFIX   0
N41   3    0.100493    0.407311    0.466412    11.00000    0.02025    0.03475 =
         0.02244   -0.00040   -0.00556   -0.00574
N42   3    0.015725    0.406678    0.497121    11.00000    0.02747    0.03666 =
         0.01978   -0.00389    0.00031   -0.00640
C43   1    0.009972    0.436512    0.589954    11.00000    0.03295    0.03729 =
         0.01887   -0.00599    0.00284   -0.00212
AFIX  43
H43   2   -0.040793    0.442990    0.630300    11.00000   -1.20000
AFIX   0
C44   1    0.089056    0.455192    0.614366    11.00000    0.04808    0.03741 =
         0.02583   -0.00810   -0.00890   -0.01150
AFIX  43
H44   2    0.103522    0.476975    0.674294    11.00000   -1.20000
AFIX   0
C45   1    0.144728    0.436513    0.535429    11.00000    0.02741    0.03452 =
         0.02457    0.00126   -0.00674   -0.01159
AFIX  43
H45   2    0.204347    0.443475    0.531555    11.00000   -1.20000
AFIX   0
N51   3    0.191396    0.409112    0.230927    11.00000    0.01622    0.02835 =
         0.01961    0.00332    0.00477   -0.00086
N52   3    0.165157    0.407475    0.122554    11.00000    0.01759    0.03420 =
         0.03003    0.00687    0.00508    0.00433
C53   1    0.207970    0.445373    0.070030    11.00000    0.03179    0.03378 =
         0.03112    0.01080    0.00499    0.00171
AFIX  43
H53   2    0.202352    0.453065   -0.005338    11.00000   -1.20000
AFIX   0
C54   1    0.261263    0.471549    0.141040    11.00000    0.04035    0.03727 =
         0.04700    0.01318   -0.00652   -0.01329
AFIX  43
H54   2    0.298073    0.500154    0.125433    11.00000   -1.20000
AFIX   0
C55   1    0.248843    0.446253    0.242412    11.00000    0.02275    0.03820 =
         0.03566    0.00251   -0.00037   -0.00403
AFIX  43
H55   2    0.277496    0.454775    0.308307    11.00000   -1.20000
AFIX   0
C13   1    0.031639    0.117590    0.318406    10.50000    0.03778    0.04365 =
         0.02789   -0.00796    0.00499   -0.01542
PART 3
O3W   4    0.565166    0.484546    0.029938    10.25000    0.12712    0.10640 =
         0.12169   -0.00282    0.00977    0.02173
PART 2
O2W   4    0.516917    0.460094    0.066249    10.25000    0.12712    0.10640 =
         0.12169   -0.00282    0.00977    0.02173
HKLF 4


REM  jul086 in C222(1)
REM R1 =  0.0331 for    4676 Fo > 4sig(Fo)  and  0.0462 for all    5450 data
REM    293 parameters refined using     12 restraints

END

WGHT      0.0482      0.0000

REM Highest difference peak  0.973,  deepest hole -0.715,  1-sigma level  0.155
Q1    1   0.4760  0.4521  0.0627  11.00000  0.05    0.97
Q2    1   0.5441  0.4681  0.1334  11.00000  0.05    0.89
Q3    1   0.6566  0.5000  0.0000  10.50000  0.05    0.78
Q4    1   0.4463  0.4975  0.0519  11.00000  0.05    0.75
Q5    1   0.1243  0.1262  0.5895  11.00000  0.05    0.75
;
_shelx_res_checksum              6422

_shelx_hkl_file                  
;
   2   0   0  423.71   15.53
   2   0   0  419.92   13.67
   2   0   0  402.33   13.66
  -2   0   0  406.04   13.66
  -2   0   0  394.99   13.66
  -2   0   0  413.77   15.53
  -4   0   0   44.68    1.97
  -4   0   0   41.61    1.73
  -4   0   0   41.86    1.69
   4   0   0   46.80    1.98
   4   0   0   42.48    1.73
   4   0   0   45.72    1.75
   6   0   0   17.60    1.12
   6   0   0   19.12    1.13
   6   0   0   19.81    1.26
  -6   0   0   18.04    1.26
  -6   0   0   16.59    1.14
   8   0   0  120.77    4.41
   8   0   0  125.38    5.01
   8   0   0  118.96    4.40
  -8   0   0  114.90    4.39
  10   0   0   21.44    1.68
 -10   0   0   21.20    1.57
  10   0   0   24.61    1.63
  12   0   0   16.84    1.46
 -12   0   0   16.34    1.34
  14   0   0    4.39    1.21
 -14   0   0    3.47    1.03
  16   0   0  119.96    5.05
  18   0   0  181.72    7.17
  20   0   0   26.96    2.63
  -3  -1   0   -0.21    0.28
  -3   1   0    0.01    0.11
  -3   1   0   -0.03    0.37
   3  -1   0    0.45    0.28
  -3   1   0    0.10    0.28
   3   1   0    0.14    0.33
   3   1   0    0.19    0.31
   3   1   0    1.08    0.36
  -3  -1   0    0.86    0.31
   3  -1   0    0.64    0.30
   3  -1   0    0.62    0.28
  -3  -1   0    0.57    0.34
   5   1   0    3.12    0.58
  -5   1   0    2.22    0.48
   5   1   0    3.19    0.51
  -5   1   0    3.92    0.66
   5  -1   0    3.10    0.50
   5  -1   0    2.53    0.47
  -5  -1   0    2.52    0.51
   5   1   0    3.91    0.58
   5  -1   0    2.07    0.56
   7  -1   0    0.65    0.52
  -7  -1   0    0.09    0.55
   7  -1   0    0.16    0.58
  -7   1   0   -0.08    0.49
   7   1   0    1.16    0.61
   7  -1   0    1.16    0.53
   7   1   0    0.25    0.52
   7   1   0    0.90    0.53
   9   1   0    1.41    0.67
  -9   1   0    0.83    0.63
   9   1   0   -0.11    0.64
  -9  -1   0   -0.09    0.62
   9  -1   0   -0.55    0.64
   9  -1   0    0.73    0.67
   9  -1   0    0.89    0.61
  11   1   0    4.82    1.01
 -11  -1   0    4.70    0.93
  11  -1   0    6.02    0.91
 -11   1   0    6.97    0.90
  13  -1   0    6.33    1.14
 -13  -1   0    6.60    1.11
 -13   1   0    5.30    1.03
  13   1   0    6.69    1.16
 -15   1   0    6.49    1.18
 -15  -1   0    5.37    1.14
  15  -1   0    9.13    1.43
  15   1   0    5.55    1.28
  17   1   0   18.06    1.96
  17  -1   0   22.31    2.03
  19  -1   0   34.86    2.64
  19   1   0   39.43    3.28
   0   2   0  242.17    9.13
   0  -2   0  315.99    9.29
  -2   2   0   19.66    0.80
  -2   2   0   21.39    0.80
  -2  -2   0   21.49    0.91
  -2  -2   0   21.94    0.89
   2   2   0   24.04    0.96
   2   2   0   23.99    0.90
   2   2   0   22.69    0.93
   2  -2   0   21.84    0.82
   2  -2   0   21.00    0.83
   2  -2   0   20.40    1.03
  -2   2   0   21.41    1.06
   4   2   0   84.75    3.09
   4   2   0   86.66    3.08
   4   2   0   90.85    3.46
   4  -2   0   86.43    3.02
   4  -2   0   83.34    3.03
  -4   2   0   83.42    3.00
  -4  -2   0   85.57    3.09
  -4   2   0   82.79    3.50
  -6   2   0   13.78    1.19
  -6  -2   0   13.19    1.08
   6   2   0   13.66    1.01
   6  -2   0   13.95    1.00
   6  -2   0   12.69    0.95
   6   2   0   14.32    1.09
   6   2   0   14.57    1.08
  -6   2   0   13.17    0.95
   6  -2   0   13.69    1.14
   8   2   0    0.39    0.57
   8   2   0   -0.39    0.59
  -8  -2   0    0.76    0.63
   8  -2   0    0.95    0.68
   8  -2   0    0.46    0.52
  -8   2   0   -0.49    0.53
   8  -2   0    0.51    0.58
 -10  -2   0   62.22    2.80
 -10   2   0   63.55    2.70
  10   2   0   67.25    2.85
  10  -2   0   63.75    2.76
  10   2   0   68.11    3.09
  12  -2   0    8.13    1.16
 -12  -2   0    9.15    1.15
  12   2   0    7.73    1.09
 -12   2   0    7.55    1.04
 -14   2   0    1.44    0.92
 -14  -2   0    0.68    0.99
  14  -2   0    1.32    1.03
  14   2   0    1.91    1.07
  16   2   0    6.71    1.52
  16  -2   0    6.26    1.43
 -16  -2   0    4.39    1.29
  18   2   0   44.02    3.25
  18  -2   0   41.98    3.18
  20  -2   0    7.39    1.89
  20   2   0    8.70    2.09
  -1  -3   0  502.77   16.55
   1  -3   0  489.87   18.82
   1  -3   0  506.65   16.51
   1   3   0  514.92   16.57
   1  -3   0  482.95   16.51
  -1  -3   0  518.14   16.62
  -1   3   0  479.50   18.83
   1   3   0  491.42   16.29
   3  -3   0   17.16    0.76
   3  -3   0   15.04    1.04
  -3  -3   0   17.77    0.91
   3   3   0   18.72    0.90
  -3   3   0   16.62    1.07
  -3   3   0   17.45    0.73
   3  -3   0   16.23    0.78
  -3   3   0   16.22    0.75
  -3  -3   0   17.92    0.92
   3   3   0   19.03    0.95
   3   3   0   18.69    0.99
   5  -3   0    0.76    0.38
   5  -3   0    1.01    0.42
   5   3   0    0.89    0.46
  -5  -3   0    0.08    0.47
  -5   3   0    0.83    0.36
  -5   3   0    1.63    0.59
   5   3   0    2.07    0.49
   5   3   0    0.47    0.49
   7  -3   0   43.65    1.88
   7   3   0   48.24    2.16
  -7   3   0   44.03    2.26
  -7  -3   0   46.96    2.03
   7  -3   0   44.73    2.24
   7   3   0   45.69    2.01
  -7   3   0   42.18    1.84
   7  -3   0   40.89    1.89
   9   3   0   60.52    2.56
   9  -3   0   57.87    2.50
   9  -3   0   59.62    2.47
   9  -3   0   60.13    2.87
  -9  -3   0   56.89    2.57
  -9   3   0   57.48    2.42
   9   3   0   61.16    2.78
  11  -3   0   14.04    1.23
  11   3   0   15.70    1.29
  11   3   0   16.02    1.53
 -11  -3   0   14.90    1.28
 -11   3   0   17.25    1.39
  13  -3   0    8.72    1.23
 -13   3   0    8.78    1.07
 -13  -3   0    8.46    1.23
  13   3   0    8.47    1.33
  15   3   0    2.85    1.19
  15  -3   0   -0.25    1.11
 -15  -3   0    0.50    1.02
  17  -3   0   37.67    2.86
  17   3   0   37.79    2.70
  19   3   0   78.46    4.30
  19  -3   0   78.01    4.20
   0  -4   0  310.46   10.22
   0  -4   0  297.94   10.22
   0   4   0  310.09   11.62
   0   4   0  302.19   10.23
   0   4   0  315.25   10.09
   2   4   0   11.50    0.60
  -2   4   0   10.95    0.47
   2  -4   0   11.27    0.79
  -2  -4   0   12.00    0.70
  -2  -4   0   11.59    0.64
   2   4   0   11.85    0.72
   2  -4   0   11.16    0.48
  -2   4   0   10.45    0.81
   2  -4   0   11.11    0.49
  -4  -4   0  113.75    3.87
   4   4   0  113.09    3.86
   4   4   0  112.17    3.90
  -4   4   0  108.05    3.72
  -4  -4   0  107.01    3.87
   4   4   0  117.02    4.31
   4  -4   0  102.97    3.76
   4  -4   0  109.49    3.75
   4  -4   0  105.36    4.39
  -4   4   0  102.46    4.41
   6  -4   0   56.41    2.27
  -6  -4   0   58.02    2.40
   6   4   0   62.17    2.42
  -6   4   0   57.90    2.71
   6  -4   0   59.39    2.26
   6   4   0   65.39    2.61
  -6   4   0   57.36    2.21
   8  -4   0   38.86    2.06
  -8   4   0   35.71    1.68
   8   4   0   38.96    1.98
  -8  -4   0   39.00    1.93
   8   4   0   38.57    1.90
   8  -4   0   36.99    1.77
   8  -4   0   39.21    1.75
  10   4   0   34.61    1.98
  10  -4   0   36.20    1.83
  10  -4   0   34.31    1.90
 -10   4   0   34.27    1.76
  10   4   0   38.42    2.07
 -10  -4   0   37.71    2.03
  12   4   0   59.92    2.87
 -12  -4   0   62.48    2.90
 -12   4   0   55.14    2.61
  12  -4   0   61.40    2.81
  14   4   0   13.39    1.55
  14  -4   0    9.87    1.36
 -14  -4   0   12.02    1.44
 -14   4   0   11.18    1.22
  16   4   0   72.35    3.63
  16  -4   0   67.73    3.46
 -16  -4   0   59.96    3.37
  18   4   0   12.26    1.94
  18  -4   0   11.70    1.80
   1   5   0    1.70    0.29
   1  -5   0    1.79    0.34
   1  -5   0    1.66    0.19
   1  -5   0    1.76    0.18
  -1  -5   0    2.12    0.31
  -1   5   0    1.82    0.36
   1   5   0    1.99    0.28
  -1  -5   0    1.60    0.25
  -3   5   0   -0.40    0.21
   3   5   0   -0.22    0.30
   3  -5   0   -0.35    0.22
   3   5   0   -0.97    0.40
   3  -5   0    0.18    0.45
  -3  -5   0   -0.34    0.36
  -3  -5   0    0.00    0.40
   3   5   0   -0.14    0.32
  -3   5   0    0.35    0.49
  -3   5   0   -0.28    0.18
   3  -5   0    0.22    0.24
   5   5   0    6.51    0.59
   5  -5   0    5.23    0.48
   5  -5   0    5.43    0.51
   5   5   0    6.25    0.66
  -5  -5   0    5.13    0.60
  -5   5   0    5.55    0.43
  -5   5   0    6.22    0.79
   7  -5   0    0.29    0.49
   7   5   0    1.07    0.57
  -7   5   0    0.27    0.40
   7  -5   0    0.71    0.51
   7   5   0    1.22    0.56
  -7  -5   0    1.32    0.61
   7  -5   0    1.01    0.48
  -7   5   0    0.89    0.67
   9  -5   0   94.66    3.71
  -9   5   0   94.70    3.60
   9  -5   0   93.43    4.25
   9   5   0  100.25    3.83
  -9  -5   0   98.04    3.84
   9   5   0  106.80    4.20
   9  -5   0   99.71    3.68
  11  -5   0   16.96    1.44
  11   5   0   21.32    1.73
 -11  -5   0   18.72    1.46
  11   5   0   17.31    1.57
 -11   5   0   17.99    1.34
  11  -5   0   17.94    1.32
  13  -5   0   18.37    1.51
 -13   5   0   20.18    1.58
 -13  -5   0   20.16    1.66
  13   5   0   22.88    1.75
 -15  -5   0    6.27    1.35
  15  -5   0    6.32    1.33
  15   5   0    4.75    1.29
 -17  -5   0    3.76    1.34
  17  -5   0    2.96    1.40
  17   5   0    4.85    1.61
  19  -5   0   17.96    2.20
  19   5   0   22.69    2.27
   0  -6   0  440.03   15.01
   0  -6   0  443.31   14.81
   0   6   0  469.10   14.82
   0   6   0  441.42   17.06
   0   6   0  436.88   15.02
   0   6   0  485.25   15.00
   0  -6   0  443.92   15.01
   2  -6   0   14.97    0.61
  -2  -6   0   14.66    0.77
  -2   6   0   13.12    0.96
   2  -6   0   15.24    0.94
   2   6   0   14.49    0.86
   2  -6   0   14.36    0.60
  -2  -6   0   15.52    0.85
  -4   6   0  246.52   10.07
   4  -6   0  260.77    8.70
   4  -6   0  259.37   10.06
   4   6   0  271.99    9.92
   4  -6   0  253.54    8.71
  -4  -6   0  264.23    8.86
   4   6   0  267.30    8.87
  -4   6   0  252.91    8.67
  -4  -6   0  261.21    8.83
  -6  -6   0  206.75    7.16
  -6   6   0  192.34    8.13
   6   6   0  224.27    8.00
   6  -6   0  201.62    6.99
   6  -6   0  203.48    8.14
   6  -6   0  200.09    7.02
   6   6   0  210.91    7.18
  -6   6   0  204.40    6.95
   8  -6   0    8.57    0.82
  -8   6   0   10.67    1.14
   8  -6   0    9.91    0.80
   8   6   0   10.92    1.04
  -8   6   0    8.23    0.69
  -8  -6   0    9.64    0.95
   8   6   0   13.45    1.01
   8  -6   0   10.11    1.04
  10   6   0   19.90    1.48
  10  -6   0   16.44    1.30
 -10   6   0   16.22    1.15
  10  -6   0   15.83    1.20
 -10  -6   0   15.39    1.29
  10   6   0   16.88    1.45
 -12   6   0  130.46    4.96
  12  -6   0  137.74    5.14
  12  -6   0  133.98    5.09
  12   6   0  141.24    5.28
 -12  -6   0  136.58    5.27
  14  -6   0   24.32    1.83
  14   6   0   22.41    1.85
 -14  -6   0   22.26    1.84
 -16  -6   0   37.16    2.76
  16   6   0   38.14    2.89
  16  -6   0   38.24    2.70
  18  -6   0    9.62    1.76
  18   6   0   10.88    1.86
   1  -7   0  213.35    7.13
  -1   7   0  209.35    7.11
  -1  -7   0  219.96    7.21
   1   7   0  219.30    7.10
   1   7   0  209.90    7.20
  -1  -7   0  212.59    7.18
   1  -7   0  212.81    7.13
  -1   7   0  208.29    8.19
   3  -7   0    0.49    0.22
  -3  -7   0   -0.02    0.43
   3  -7   0    0.28    0.45
  -3   7   0    0.49    0.48
   3  -7   0    0.14    0.23
   3   7   0    0.66    0.47
  -3  -7   0    0.04    0.36
  -3  -7   0    0.02    0.22
  -5   7   0  251.97   10.20
   5   7   0  266.84    8.99
   5   7   0  281.01   10.02
   5  -7   0  252.91    8.80
   5  -7   0  254.34   10.18
  -5  -7   0  268.65    8.95
  -5   7   0  257.25    8.75
   5  -7   0  257.60    8.79
   7   7   0  200.25    7.17
  -7   7   0  181.37    6.21
   7  -7   0  177.56    6.27
   7  -7   0  174.96    6.29
   7   7   0  183.77    6.47
   7  -7   0  184.38    7.34
  -7  -7   0  182.15    6.46
  -7   7   0  171.91    7.33
  -9  -7   0    5.53    0.93
  -9   7   0    4.88    0.61
   9  -7   0    5.61    0.73
   9  -7   0    5.67    0.79
   9   7   0    7.54    0.87
   9   7   0    6.38    1.00
  11   7   0    8.27    1.02
 -11   7   0    7.42    0.80
  11  -7   0    7.27    0.92
  11   7   0    5.65    1.05
  11  -7   0    7.38    1.00
 -11  -7   0    4.98    1.05
  13   7   0   70.78    3.28
  13  -7   0   64.66    3.11
 -13   7   0   63.63    2.84
 -13  -7   0   73.45    3.33
 -15  -7   0   -1.74    1.13
  15   7   0    2.58    1.30
  15  -7   0    0.56    1.16
  17   7   0    6.02    1.63
  17  -7   0    7.07    1.58
 -17  -7   0    9.79    1.70
  19   7   0   19.94    2.33
  19  -7   0   12.47    2.00
   0  -8   0  187.66    6.24
   0   8   0  182.04    7.09
   0   8   0  187.44    6.20
   0   8   0  180.32    6.24
   0  -8   0  184.64    6.23
   2  -8   0   15.63    0.67
  -2  -8   0   16.95    0.92
   2  -8   0   16.73    1.02
   2   8   0   15.83    0.89
   2  -8   0   16.71    0.70
  -2  -8   0   15.45    0.84
   2   8   0   15.46    0.95
  -2   8   0   14.16    1.04
   4  -8   0   17.97    0.83
  -4   8   0   17.85    1.33
  -4  -8   0   19.56    1.12
   4  -8   0   19.33    0.84
   4   8   0   19.59    1.19
  -4  -8   0   17.94    0.97
  -4  -8   0   17.75    1.06
   6   8   0   46.56    2.11
   6  -8   0   46.31    2.36
   6  -8   0   47.93    1.79
   6   8   0   51.02    2.08
   6  -8   0   44.10    1.82
  -6   8   0   43.82    2.36
  -6  -8   0   45.39    2.06
  -6   8   0   45.81    1.70
   8  -8   0   21.87    1.67
   8   8   0   19.44    1.49
   8   8   0   21.97    1.33
  -8  -8   0   19.44    1.46
   8  -8   0   18.70    1.14
   8  -8   0   16.28    1.22
  -8   8   0   18.56    0.98
  10  -8   0    1.32    0.64
  10  -8   0    0.13    0.68
  10   8   0   -0.54    0.83
  10   8   0    0.93    0.68
 -10   8   0   -0.05    0.49
 -10  -8   0    0.80    0.85
 -12   8   0    9.80    0.94
  12  -8   0   11.92    1.20
 -12  -8   0   10.95    1.32
  12  -8   0   10.53    1.10
  12   8   0    9.52    1.23
 -14  -8   0    5.17    1.26
  14   8   0    5.90    1.40
  14  -8   0    5.86    1.20
 -16  -8   0    4.69    1.37
  16  -8   0    4.34    1.36
  16   8   0    2.22    1.41
  18   8   0    0.72    1.65
  18  -8   0    1.56    1.54
 -18  -8   0    3.07    1.52
  -1  -9   0  130.48    4.30
   1  -9   0  125.82    4.21
  -1   9   0  125.19    4.24
  -1   9   0  118.55    4.87
   1   9   0  121.03    4.29
  -1   9   0  118.64    4.20
  -1  -9   0  123.92    4.26
   1   9   0  128.61    4.26
   3  -9   0    7.05    0.49
   3  -9   0    6.89    0.49
  -3   9   0    7.66    0.75
   3   9   0    7.59    0.69
  -3  -9   0    6.95    0.61
   3  -9   0    6.56    0.70
  -3  -9   0    8.35    0.69
  -5  -9   0   12.33    0.91
   5  -9   0   12.10    1.03
  -5  -9   0   12.80    1.04
   5  -9   0   12.01    0.75
   5  -9   0   12.23    0.74
   5   9   0   13.47    1.01
   5   9   0   13.28    0.83
  -5   9   0   10.15    1.03
  -7   9   0   91.36    4.29
   7  -9   0   94.76    3.53
   7  -9   0   97.55    3.51
   7   9   0  107.85    4.02
  -7  -9   0  103.71    3.79
   7   9   0   98.67    3.79
   7  -9   0   95.42    4.29
  -7   9   0   97.82    3.41
  -9   9   0   10.97    0.83
   9  -9   0    9.07    0.90
   9   9   0   11.36    1.04
   9   9   0   13.04    1.18
  -9  -9   0   10.06    1.13
   9  -9   0   10.66    0.86
 -11  -9   0    2.68    1.06
  11  -9   0    0.79    0.69
  11  -9   0    2.58    0.85
  11   9   0    4.90    1.14
 -11   9   0    2.79    0.61
  13  -9   0    1.85    1.04
 -13  -9   0    3.89    1.16
  13   9   0    2.67    1.11
 -15  -9   0    0.98    1.21
  15   9   0    1.93    1.41
  15  -9   0   -0.15    1.15
 -17  -9   0    2.63    1.42
  17  -9   0    2.64    1.49
  17   9   0    3.18    1.59
  19  -9   0    9.22    1.93
  19   9   0   10.35    2.10
   0  10   0   25.77    1.25
   0 -10   0   27.52    1.12
   0  10   0   28.02    1.22
   0  10   0   26.81    1.14
   0 -10   0   25.47    1.09
  -2 -10   0    6.55    0.60
  -2 -10   0    6.07    0.55
  -2  10   0    5.77    0.71
   2  10   0    8.00    0.65
   2 -10   0    6.38    0.52
   2  10   0    6.99    0.64
   2 -10   0    7.14    0.51
  -4 -10   0  120.09    4.26
   4 -10   0  116.33    4.09
   4  10   0  125.53    4.35
  -4 -10   0  119.09    4.17
   4 -10   0  118.35    4.08
  -4 -10   0  126.38    4.34
  -4  10   0  113.08    4.90
   6 -10   0  243.90    9.65
   6  10   0  250.81    8.51
   6 -10   0  242.33    8.25
  -6  10   0  236.14    9.67
   6  10   0  258.39    9.37
  -6 -10   0  239.70    8.45
  -6 -10   0  238.69    8.25
   6 -10   0  241.33    8.26
   8 -10   0   10.68    0.79
  -8  10   0   10.51    0.71
   8 -10   0   10.34    0.84
   8  10   0    8.76    1.00
  -8 -10   0   10.76    1.12
   8  10   0   13.88    1.06
 -10 -10   0    1.78    0.93
 -10  10   0    1.94    0.49
  10 -10   0    1.64    0.65
  10  10   0    1.29    0.84
  10 -10   0    0.69    0.71
  12  10   0  120.58    4.78
 -12 -10   0  118.82    4.83
  12 -10   0  114.68    4.56
  14  10   0   18.59    1.65
  14 -10   0   20.16    1.69
 -14 -10   0   21.36    1.94
  16  10   0   52.90    3.28
 -16 -10   0   52.50    3.33
  16 -10   0   47.66    3.03
  18 -10   0    2.98    1.67
  18  10   0    1.08    1.66
 -18 -10   0    2.35    1.56
  -1  11   0  187.88    7.31
  -1 -11   0  189.77    6.43
   1  11   0  192.02    6.38
   1  11   0  182.06    6.44
  -1  11   0  191.81    6.37
   1 -11   0  184.21    6.35
  -1 -11   0  183.52    6.40
   1 -11   0  194.78    6.37
  -3 -11   0    6.55    0.63
   3 -11   0    6.52    0.54
  -3  11   0    6.05    0.76
  -3 -11   0    7.92    0.71
   3 -11   0    6.20    0.52
   3  11   0    6.51    0.70
   5 -11   0   74.04    3.31
   5 -11   0   75.36    2.66
   5  11   0   77.31    2.99
   5 -11   0   75.32    2.66
  -5  11   0   72.49    3.37
  -5 -11   0   71.82    2.78
  -5 -11   0   76.14    2.90
  -7 -11   0    1.57    0.58
   7 -11   0    1.51    0.83
   7 -11   0    3.25    0.47
   7 -11   0    1.57    0.51
  -7 -11   0    3.97    0.79
   7  11   0    3.01    0.74
  -7  11   0    1.83    0.89
   9 -11   0   25.69    1.40
   9  11   0   28.00    1.84
   9 -11   0   25.23    1.53
  -9 -11   0   28.91    1.90
 -11  11   0   46.77    1.98
  11 -11   0   47.99    2.39
 -11 -11   0   50.21    2.74
  11 -11   0   50.84    2.27
  11  11   0   52.71    2.64
  13  11   0    7.21    1.29
  13 -11   0    7.93    1.22
 -13 -11   0    5.34    1.23
  15 -11   0    3.83    1.35
  15  11   0    3.42    1.27
 -15 -11   0    4.16    1.39
  17 -11   0   27.19    2.30
  17  11   0   35.89    2.73
 -17 -11   0   28.97    2.34
   0 -12   0    0.47    0.37
   0  12   0    0.28    0.40
   0  12   0    0.32    0.41
   0  12   0    0.26    0.42
   0 -12   0    0.04    0.34
   2  12   0   15.24    1.04
   2 -12   0   15.08    0.79
   2  12   0   16.03    1.06
  -2  12   0   12.10    1.16
  -2  12   0   15.65    0.98
   2 -12   0   14.89    0.76
  -2 -12   0   15.06    1.01
  -2 -12   0   14.31    0.97
  -4 -12   0   10.76    0.86
   4 -12   0   10.66    0.67
  -4 -12   0    8.87    0.79
   4 -12   0   11.36    0.67
   4  12   0   10.86    0.94
  -4 -12   0   11.59    0.91
  -4  12   0    7.64    0.93
   6 -12   0    8.23    0.60
  -6 -12   0    7.32    0.86
  -6  12   0    6.37    1.02
   6 -12   0    6.62    0.56
  -6 -12   0    7.00    0.80
   6  12   0    9.13    0.99
   8 -12   0   44.67    2.00
   8  12   0   52.67    2.39
   8 -12   0   48.32    1.96
  -8 -12   0   47.49    2.38
  10 -12   0   64.20    2.63
  10  12   0   66.48    2.99
  10 -12   0   64.05    2.71
 -10 -12   0   64.06    3.06
  12 -12   0   13.03    1.31
 -12 -12   0   14.96    1.67
  12  12   0   14.30    1.43
 -14 -12   0    3.59    1.23
  14 -12   0    3.62    1.24
  14  12   0    3.41    1.15
  16  12   0   20.61    2.08
 -16 -12   0   19.13    1.90
  16 -12   0   17.12    1.92
  18  12   0    6.48    1.92
 -18 -12   0    7.92    1.72
  18 -12   0    5.44    1.86
   1 -13   0  110.46    3.87
   1  13   0  111.91    3.96
  -1 -13   0  110.77    3.93
  -1 -13   0  114.49    3.95
  -1  13   0  110.45    3.95
   1 -13   0  114.93    3.88
   1  13   0  106.55    3.96
  -1  13   0  112.12    4.48
   3  13   0   31.56    1.49
  -3 -13   0   34.50    1.56
   3 -13   0   32.46    1.25
  -3  13   0   28.05    1.75
   3 -13   0   28.00    1.24
   3  13   0   31.29    1.57
  -3 -13   0   30.17    1.49
  -5  13   0    0.85    0.73
   5 -13   0    0.65    0.38
   5 -13   0    0.37    0.36
  -5 -13   0    0.64    0.57
   5  13   0    0.15    0.64
  -5 -13   0    0.91    0.51
   7  13   0   -0.08    0.75
   7 -13   0    0.43    0.44
  -7 -13   0    0.03    0.73
   7 -13   0    0.27    0.46
  -9 -13   0    0.25    0.83
   9 -13   0   -0.53    0.62
   9  13   0   -0.24    0.78
   9 -13   0    0.10    0.55
  11 -13   0    0.45    0.70
 -11 -13   0    0.19    1.05
  11 -13   0    0.10    0.87
  11  13   0    0.26    0.91
  13  13   0    1.03    1.11
 -13 -13   0   -0.77    1.22
  13 -13   0    0.68    1.08
 -15 -13   0    7.90    1.47
  15  13   0    7.52    1.55
  15 -13   0    8.47    1.53
  17 -13   0   30.09    2.39
 -17 -13   0   21.16    2.23
  17  13   0   32.79    2.66
   0  14   0  433.19   15.33
   0 -14   0  458.05   15.32
   0  14   0  455.89   15.19
   0 -14   0  482.94   15.35
  -2 -14   0  146.94    5.20
   2 -14   0  154.04    5.11
  -2  14   0  141.90    5.17
   2  14   0  149.59    5.19
  -2  14   0  148.82    5.95
   2 -14   0  148.48    5.10
  -2 -14   0  158.22    5.25
   2  14   0  142.48    5.25
  -4 -14   0   13.86    1.06
  -4  14   0   10.97    1.11
  -4 -14   0   12.50    0.95
   4 -14   0   11.93    0.76
   4 -14   0   11.48    0.76
   4  14   0   11.39    1.00
  -4 -14   0   10.70    0.82
  -6 -14   0    5.62    0.85
   6  14   0    6.05    0.91
   6 -14   0    7.38    0.60
   6 -14   0    5.08    0.55
   8  14   0    1.56    0.81
   8 -14   0    2.35    0.56
  -8 -14   0    2.01    0.86
   8 -14   0    1.68    0.58
  10 -14   0   34.10    1.74
  10 -14   0   37.61    1.87
  10  14   0   34.43    2.21
 -10 -14   0   30.40    2.29
  12  14   0    2.07    1.20
  12 -14   0   -0.62    0.95
 -12 -14   0    1.84    1.24
  14  14   0   10.44    1.65
  14 -14   0    6.66    1.42
 -14 -14   0    7.23    1.43
  16  14   0   27.29    2.41
  16 -14   0   29.50    2.28
 -16 -14   0   21.94    2.19
  18 -14   0  103.91    5.00
  18  14   0  105.58    5.15
 -18 -14   0   98.65    5.04
  -1 -15   0   88.18    3.13
   1  15   0   83.24    3.17
   1 -15   0   84.47    3.04
   1  15   0   81.91    3.13
  -1  15   0   84.25    3.15
  -1 -15   0   86.62    3.10
   1 -15   0   82.60    3.04
  -3  15   0   10.75    0.92
   3  15   0   14.52    1.04
  -3 -15   0   11.67    0.91
   3 -15   0   12.45    0.80
   3  15   0    9.82    0.89
  -3 -15   0   14.59    1.12
   3 -15   0   12.17    0.81
  -5 -15   0   11.93    1.05
   5 -15   0   12.11    0.83
   5 -15   0   11.36    0.80
   5  15   0   10.71    1.04
  -7 -15   0    4.52    0.94
   7 -15   0    5.79    0.63
   7 -15   0    5.16    0.61
   7  15   0    5.69    1.03
   9 -15   0    0.69    0.61
  -9 -15   0    0.39    0.95
   9  15   0   -0.10    0.83
   9 -15   0    0.05    0.63
  11  15   0   16.80    1.66
  11 -15   0   15.12    1.29
 -11 -15   0   23.29    1.87
  13 -15   0    3.44    1.17
  13  15   0    3.23    1.17
 -13 -15   0    3.82    1.39
  15 -15   0   -0.76    1.31
 -15 -15   0   -0.80    1.44
  15  15   0    2.27    1.26
 -17 -15   0   13.26    2.15
  17 -15   0   14.73    2.03
  17  15   0   13.06    2.05
   0 -16   0  506.79   16.55
   0  16   0  482.52   16.39
   0 -16   0  498.71   16.54
   0  16   0  484.09   16.53
  -2 -16   0   57.24    2.27
   2  16   0   52.84    2.32
   2 -16   0   51.61    2.10
  -2  16   0   54.49    2.28
   2 -16   0   58.72    2.13
  -2 -16   0   57.39    2.25
   2  16   0   54.52    2.29
   4 -16   0    7.73    0.58
  -4 -16   0    6.88    0.84
  -4 -16   0    7.51    0.82
   4  16   0    6.96    0.89
   4 -16   0    6.42    0.57
  -6 -16   0    8.40    1.03
   6 -16   0    9.09    0.67
   6 -16   0    7.16    0.63
   6  16   0   10.67    1.16
   8 -16   0    5.75    0.73
  -8 -16   0    5.32    1.02
   8  16   0    4.75    1.00
   8 -16   0    5.89    0.69
  10  16   0    7.03    1.32
  10 -16   0    5.68    0.88
 -10 -16   0    5.21    1.29
  10 -16   0    5.71    0.80
  12 -16   0    1.17    1.01
 -12 -16   0    0.11    1.31
  12  16   0   -0.94    0.98
 -14 -16   0    2.14    1.33
  14 -16   0   -0.65    1.21
  14  16   0    0.34    1.33
  16  16   0   30.16    2.54
 -16 -16   0   23.50    2.24
  16 -16   0   25.46    2.23
   1  17   0  362.21   12.82
  -1  17   0  369.22   12.71
   1 -17   0  373.46   12.77
  -1 -17   0  388.94   12.83
   1  17   0  373.79   12.73
   1 -17   0  389.76   12.79
  -1 -17   0  398.21   12.86
   3 -17   0    1.34    0.49
   3  17   0    0.54    0.70
  -3 -17   0    1.66    0.64
   3  17   0    0.71    0.64
  -3  17   0    0.13    0.65
  -3 -17   0    0.93    0.64
   3 -17   0    0.75    0.48
  -5 -17   0    1.07    0.70
   5 -17   0    1.82    0.46
   5 -17   0    1.08    0.48
   5  17   0    1.52    0.78
  -7 -17   0    7.90    1.11
   7 -17   0    7.40    0.71
   7 -17   0    7.18    0.72
   7  17   0    7.54    1.06
   9  17   0    7.04    1.08
  -9 -17   0    7.85    1.29
   9 -17   0    8.03    0.81
   9 -17   0    7.10    0.87
  11 -17   0    2.89    0.99
  11  17   0    2.16    1.07
 -11 -17   0    2.49    1.23
 -13 -17   0   -0.78    1.44
  13 -17   0   -1.31    1.14
  13  17   0    1.25    1.39
 -15 -17   0    4.77    1.68
  15 -17   0    5.07    1.59
  15  17   0    8.34    1.55
 -17 -17   0   61.96    3.99
  17 -17   0   63.16    3.85
  17  17   0   60.21    4.03
   0  18   0    3.30    0.74
   0 -18   0    1.83    0.60
   0  18   0    2.83    0.57
   0 -18   0    3.62    0.64
   2  18   0    9.58    0.89
   2  18   0   10.04    0.96
   2 -18   0   11.08    0.78
   2 -18   0    9.12    0.75
  -2 -18   0    9.77    0.89
  -2  18   0    9.96    0.98
  -2 -18   0   10.11    0.89
  -4 -18   0    0.27    0.71
  -4 -18   0    0.41    0.69
   4 -18   0    0.39    0.47
  -4  18   0   -0.06    0.66
   4  18   0   -0.44    0.69
  -6 -18   0    5.81    0.94
   6  18   0    5.75    0.96
   6 -18   0    7.42    0.67
   6 -18   0    6.55    0.67
   8  18   0    1.28    0.87
   8 -18   0    1.70    0.64
   8 -18   0    0.40    0.65
  -8 -18   0    2.37    1.04
  10  18   0    9.57    1.36
 -10 -18   0    7.71    1.29
  10 -18   0    8.04    1.02
  12  18   0    0.27    1.12
 -12 -18   0    1.93    1.30
  12 -18   0   -0.03    1.08
  14 -18   0   -1.30    1.35
 -14 -18   0    0.88    1.63
  14  18   0    1.48    1.20
 -16 -18   0    2.80    1.72
  16  18   0    3.83    1.77
  16 -18   0    3.98    1.74
  -1 -19   0   36.10    1.79
   1  19   0   37.23    1.97
   1 -19   0   37.82    1.70
  -1 -19   0   37.01    1.76
   1  19   0   37.91    1.73
   1 -19   0   37.64    1.72
  -1  19   0   37.60    1.91
   3 -19   0   -1.17    0.50
  -3  19   0   -0.06    0.67
  -3 -19   0    0.55    0.71
   3 -19   0    0.25    0.52
   3  19   0   -1.09    0.75
  -3 -19   0   -0.07    0.65
   3  19   0   -0.75    0.65
   5 -19   0    4.63    0.64
  -5 -19   0    5.18    0.94
   5 -19   0    6.31    0.65
   5  19   0    4.21    0.90
   7 -19   0   -0.30    0.60
   7 -19   0   -1.14    0.57
  -7 -19   0    0.49    0.96
   7  19   0   -0.67    0.91
   9  19   0   39.19    2.50
   9 -19   0   40.87    1.92
   9 -19   0   41.79    2.01
  -9 -19   0   42.90    2.66
  11 -19   0    5.67    1.07
  11  19   0    7.39    1.38
 -11 -19   0    7.18    1.46
 -13 -19   0    6.75    1.66
  13  19   0    7.62    1.50
  13 -19   0    8.02    1.41
  15 -19   0   -0.19    1.57
  15  19   0    1.86    1.56
 -15 -19   0    0.16    1.58
   0 -20   0   50.81    2.19
   0  20   0   50.89    2.36
   0 -20   0   51.88    2.17
   2  20   0    4.34    0.75
   2 -20   0    6.40    0.71
  -2 -20   0    5.53    0.86
   2 -20   0    5.98    0.73
  -2 -20   0    5.38    0.84
  -2  20   0    3.96    0.86
   2  20   0    4.83    0.96
   4 -20   0   18.20    1.11
  -4 -20   0   15.53    1.31
  -4  20   0   13.53    1.19
  -4 -20   0   14.04    1.22
   4 -20   0   18.22    1.17
   4  20   0   13.42    1.20
   6 -20   0   10.59    0.87
   6  20   0   11.82    1.20
  -6 -20   0   13.56    1.33
   6 -20   0   13.95    1.11
   8 -20   0    0.62    0.67
   8 -20   0    1.79    0.68
   8  20   0    1.29    0.95
  -8 -20   0    2.00    1.05
  10 -20   0   -1.73    0.87
 -10 -20   0    1.57    1.35
  10  20   0    0.62    1.13
  12  20   0    4.11    1.28
 -12 -20   0    4.88    1.52
  12 -20   0    6.04    1.25
 -14 -20   0    2.73    1.71
  14 -20   0   -0.65    1.43
  16 -20   0    9.36    1.90
  -1 -21   0    6.41    0.83
   1  21   0    6.72    1.08
   1 -21   0    4.79    0.76
   1 -21   0    5.32    0.76
  -1 -21   0    6.93    0.89
  -1  21   0    6.90    1.03
   3 -21   0    6.32    0.73
  -3 -21   0    4.72    0.90
   3  21   0    5.89    0.87
   3  21   0    6.88    1.03
  -3  21   0    5.78    1.02
   3 -21   0    5.21    0.75
  -5 -21   0   44.05    2.44
  -5  21   0   51.33    2.44
   5 -21   0   50.93    2.03
   5 -21   0   48.67    2.07
   5  21   0   45.13    2.40
  -7 -21   0    8.11    1.26
   7  21   0    9.63    1.24
   7 -21   0    8.12    0.84
   9  21   0   18.39    1.66
   9 -21   0   23.88    1.52
  -9 -21   0   25.20    2.05
  11 -21   0    0.37    1.06
 -11 -21   0   -2.18    1.35
  13 -21   0   38.08    2.45
 -13 -21   0   29.50    2.63
 -15 -21   0   -1.33    1.77
  15 -21   0   -2.64    1.54
   0 -22   0    2.19    0.69
   0  22   0    2.60    0.97
   0 -22   0    1.57    0.75
  -2 -22   0    0.13    0.81
  -2  22   0    0.46    0.87
   2 -22   0    1.47    0.65
   2  22   0    2.05    0.93
   2 -22   0    0.25    0.71
  -4  22   0    0.56    0.87
   4 -22   0    1.45    0.63
  -4 -22   0    0.63    0.85
   4 -22   0    1.95    0.70
  -6 -22   0    2.37    1.07
   6 -22   0    2.34    0.69
  -6  22   0    3.41    1.03
  -8 -22   0    2.24    1.26
   8 -22   0   -1.46    0.72
 -10 -22   0    9.82    1.69
  10 -22   0    8.63    1.00
  12 -22   0    2.32    1.27
 -12 -22   0    2.12    1.49
 -14 -22   0    0.05    1.57
  14 -22   0   -0.81    1.46
   1 -23   0   10.81    1.03
  -1  23   0   13.66    1.34
   1  23   0   13.56    1.30
  -1 -23   0   12.81    1.15
   3 -23   0    6.54    0.80
  -3  23   0    7.27    1.11
  -3 -23   0    4.30    0.99
   3  23   0    4.79    1.15
   3 -23   0    6.76    0.86
  -5  23   0   35.51    2.23
  -5 -23   0   33.22    2.23
   5 -23   0   38.03    1.84
   5 -23   0   36.57    1.76
  -7 -23   0   14.39    1.55
  -7  23   0   12.93    1.46
   7 -23   0   16.28    1.35
  -9 -23   0    2.31    1.28
   9 -23   0   -0.21    0.79
 -11 -23   0    5.94    1.78
  11 -23   0    8.71    1.08
 -13 -23   0   19.14    2.46
  13 -23   0   20.89    1.85
   0 -24   0    8.46    1.04
   0  24   0    7.03    1.22
  -2 -24   0    0.92    0.91
   2  24   0   -0.45    1.04
  -2  24   0   -1.15    0.96
   2 -24   0    0.98    0.78
  -4 -24   0   10.00    1.23
  -4  24   0    9.72    1.27
   4 -24   0   10.63    1.00
  -6  24   0   53.95    2.79
   6 -24   0   51.97    2.31
  -6 -24   0   49.35    2.85
  -8  24   0    2.95    1.30
   8 -24   0    2.78    0.82
  -8 -24   0    1.44    1.39
 -10 -24   0   -0.04    1.28
  12 -24   0   13.67    1.34
 -12 -24   0   10.10    1.87
   1 -25   0   50.48    2.45
  -1 -25   0   52.30    2.56
  -1  25   0   56.77    2.79
   1  25   0   49.44    2.78
  -3 -25   0    1.91    1.03
  -3  25   0   -0.39    1.04
   3  25   0    1.56    1.21
   3 -25   0    1.13    0.84
   5 -25   0    6.01    0.98
  -5 -25   0    5.13    1.20
  -5  25   0    5.26    1.21
  -7  25   0   -0.57    1.17
  -7 -25   0   -0.31    1.17
   7 -25   0   -1.47    0.89
  -9  25   0   -0.09    1.23
  -9 -25   0    1.49    1.37
   9 -25   0    1.08    0.87
  11 -25   0    4.51    1.08
 -11 -25   0    4.35    1.60
  13 -25   0    2.32    1.23
   0 -26   0   42.80    2.33
   0  26   0   41.78    2.60
   2 -26   0    0.46    0.97
  -2 -26   0    0.70    1.03
  -2  26   0    0.68    1.10
   2  26   0   -1.31    1.27
  -4 -26   0    0.81    1.08
   4 -26   0    2.61    0.95
  -4  26   0    0.80    1.20
  -6 -26   0   12.03    1.53
  -6  26   0   10.75    1.49
   6 -26   0   11.63    1.17
  -8 -26   0    1.03    1.33
  -8  26   0    1.45    1.32
 -10 -26   0    4.59    1.60
 -12 -26   0    2.04    1.69
   1  27   0   17.44    1.74
  -1 -27   0   16.18    1.46
   1 -27   0   14.96    1.38
  -1  27   0   18.67    1.80
   3 -27   0   -0.93    0.97
  -3  27   0    0.90    1.16
  -3 -27   0    0.64    1.08
   3  27   0   -0.27    1.38
  -5  27   0   20.38    1.80
   5 -27   0   21.87    1.80
  -5 -27   0   19.71    1.84
  -7 -27   0    1.64    1.35
  -7  27   0    1.20    1.24
   7 -27   0    1.68    1.03
  -9  27   0    0.81    1.43
  -9 -27   0    2.13    1.65
 -11 -27   0    4.27    1.71
 -11  27   0    3.95    1.59
   0 -28   0   50.72    2.73
   0  28   0   51.76    3.01
   2 -28   0   12.84    1.38
  -2  28   0   14.01    1.64
  -2 -28   0   12.76    1.50
   2  28   0   14.30    1.78
  -4 -28   0    5.60    1.35
   4 -28   0    5.23    1.13
  -4  28   0    4.57    1.36
   6 -28   0    0.84    1.05
  -6  28   0    0.18    1.31
  -6 -28   0   -0.34    1.37
  -8  28   0    7.95    1.58
  -8 -28   0   -0.26    1.52
 -10  28   0   10.80    1.82
 -10 -28   0    9.91    2.01
  -1 -29   0    2.97    1.25
   1  29   0    1.58    1.50
  -1  29   0    3.67    1.49
   1 -29   0    1.32    1.20
   3 -29   0    2.46    1.19
  -3 -29   0    1.40    1.29
  -3  29   0    1.35    1.28
  -5 -29   0    1.77    1.43
  -5  29   0    2.28    1.40
   5 -29   0    2.33    1.13
  -7 -29   0    0.06    1.54
  -7  29   0   -2.27    1.29
  -9  29   0    1.43    1.48
  -9 -29   0    2.30    1.78
   0 -30   0   56.61    3.11
   0  30   0   62.36    3.46
   2  30   0   21.76    2.20
  -2  30   0   18.89    1.91
   2 -30   0   17.28    1.65
  -2 -30   0   15.90    1.70
  -4  30   0    0.33    1.34
   4 -30   0    3.92    1.27
  -4 -30   0    1.51    1.38
  -6  30   0    1.45    1.49
  -6 -30   0   -0.28    1.51
  -8 -30   0    0.62    1.66
  -1 -31   0   63.41    3.31
   1  31   0   59.46    3.67
  -1  31   0   65.64    3.60
   1 -31   0   63.03    3.31
  -3 -31   0   -0.98    1.40
   3 -31   0   -0.15    1.31
  -3  31   0   -0.55    1.48
   5 -31   0    2.07    1.33
  -5 -31   0    1.31    1.58
  -5  31   0    1.59    1.53
   0 -32   0    2.79    1.48
   0  32   0    0.21    1.70
  -2 -32   0    1.72    1.51
   2 -32   0   -0.69    1.44
   2  32   0   -1.90    1.71
  -2  32   0    1.22    1.53
   4 -32   0   -0.69    1.38
  -4  32   0    0.88    1.50
  -4 -32   0    1.76    1.59
   0   0  -1    0.19    0.08
   0   0   1    0.08    0.08
   0   0  -1    0.00    0.06
   0   0   1    0.03    0.07
   2   0   1   13.08    0.56
   2   0  -1   13.74    0.62
  -2   0  -1   12.22    0.55
   2   0  -1   12.36    0.58
  -2   0   1   12.93    0.61
   2   0   1   12.18    0.55
  -4   0  -1  101.25    3.61
   4   0   1  107.47    3.63
  -4   0   1   99.77    3.60
   4   0   1   99.08    3.60
  -4   0   1  102.23    3.65
   4   0  -1  103.54    3.63
   4   0  -1  107.36    3.65
  -4   0  -1  105.43    4.12
  -6   0  -1   45.72    2.15
   6   0  -1   45.54    2.14
   6   0  -1   46.57    1.93
   6   0   1   48.08    1.90
  -6   0  -1   43.31    1.88
   6   0  -1   45.03    1.91
   6   0   1   47.46    1.92
  -6   0   1   42.94    1.93
   8   0   1    1.86    0.59
   8   0   1    0.81    0.54
  -8   0   1    1.26    0.61
   8   0  -1    2.19    0.65
  -8   0  -1    1.02    0.65
   8   0  -1    0.40    0.59
  -8   0  -1    1.57    0.61
  10   0  -1  115.81    4.66
 -10   0  -1  107.92    4.08
 -10   0  -1  103.31    4.64
  10   0  -1  109.08    4.16
 -10   0   1  102.82    4.11
  10   0   1  106.71    4.11
  12   0   1   31.08    2.01
  12   0  -1   31.88    2.06
 -12   0   1   32.94    2.02
 -12   0  -1   32.62    1.99
  14   0  -1   25.52    1.92
 -14   0   1   23.38    1.73
 -14   0  -1   25.40    1.97
  14   0   1   22.08    1.72
 -16   0   1   12.92    1.59
  16   0  -1   11.02    1.63
  16   0   1   11.64    1.69
  18   0  -1    4.64    1.67
  18   0   1    1.16    1.57
  20   0  -1    1.67    1.75
  20   0   1    2.01    1.72
   1  -1   1  456.49   15.85
   1  -1   1  467.01   15.83
  -1   1   1  485.17   15.87
   1   1  -1  488.56   15.87
  -1  -1  -1  493.75   15.91
   1   1  -1  469.55   15.90
  -1   1   1  474.60   15.87
  -1  -1  -1  476.50   15.89
   1  -1  -1  483.85   15.89
  -1  -1   1  482.24   15.87
  -1   1  -1  439.87   15.84
  -1  -1   1  473.05   15.93
   1   1   1  468.73   15.91
   1   1   1  499.83   15.88
   1  -1  -1  485.09   15.85
  -3  -1  -1   40.88    1.52
   3  -1   1   39.39    1.50
   3   1  -1   41.51    1.56
  -3  -1  -1   39.82    1.52
  -3   1   1   39.65    1.50
   3  -1   1   39.68    1.52
   3   1  -1   41.09    1.59
  -3   1   1   40.37    1.54
   3  -1  -1   40.38    1.53
  -3   1  -1   40.85    1.76
  -3  -1   1   40.16    1.54
  -3   1  -1   39.63    1.52
   3   1   1   40.53    1.54
  -3  -1   1   39.65    1.61
   3   1   1   40.66    1.53
   3  -1  -1   42.16    1.54
   5   1  -1   33.23    1.51
   5  -1   1   30.26    1.42
   5  -1   1   32.51    1.43
  -5  -1  -1   32.28    1.62
   5   1  -1   30.33    1.47
  -5   1   1   32.19    1.45
  -5  -1  -1   32.61    1.45
   5  -1  -1   34.68    1.45
   5  -1  -1   36.72    1.67
  -5   1  -1   33.67    1.65
  -5   1  -1   33.83    1.44
   5   1   1   34.70    1.45
  -5  -1   1   33.30    1.54
   5  -1  -1   32.06    1.45
   5   1   1   33.78    1.46
   7   1  -1   52.50    2.25
   7  -1   1   55.72    2.22
   7   1  -1   53.65    2.50
   7  -1   1   53.08    2.24
  -7  -1  -1   55.27    2.24
  -7  -1  -1   56.97    2.54
  -7   1   1   52.42    2.23
   7   1   1   55.65    2.24
  -7   1  -1   54.47    2.21
   7  -1  -1   52.54    2.24
  -7   1  -1   53.22    2.55
   7  -1  -1   57.47    2.56
  -7  -1   1   50.47    2.30
   7  -1  -1   56.59    2.24
   7   1   1   56.10    2.28
  -9  -1  -1    6.69    0.82
   9  -1   1    6.06    0.86
   9   1  -1    7.14    0.88
   9  -1   1    7.18    0.87
  -9   1   1    6.28    0.84
   9   1  -1    6.50    0.87
  -9  -1  -1    6.83    0.92
  -9  -1   1    5.58    0.87
  -9   1  -1    5.73    0.89
   9   1   1    6.40    0.87
   9  -1  -1    7.40    0.87
  -9   1  -1    6.35    0.79
   9  -1  -1    7.73    0.92
 -11   1   1    7.76    0.98
 -11  -1  -1    6.80    0.92
  11  -1   1    5.71    0.93
  11   1  -1    6.49    1.04
  11   1   1    7.13    0.99
 -11   1  -1    7.63    0.96
  11  -1  -1    5.36    0.95
 -11  -1   1    6.13    0.97
 -11   1  -1    5.88    1.07
  13   1  -1   39.90    2.41
 -13  -1  -1   41.06    2.31
  13  -1   1   39.39    2.35
 -13   1   1   42.13    2.29
  13  -1  -1   37.93    2.41
 -13  -1   1   41.35    2.35
 -13   1  -1   41.58    2.25
  13   1   1   40.32    2.40
  15   1  -1    2.61    1.20
 -15  -1  -1    3.87    1.14
  15  -1   1    3.08    1.25
 -15   1   1    2.13    1.07
 -15   1  -1    4.62    1.12
  15   1   1    4.23    1.18
  15  -1  -1    2.06    1.18
 -15  -1   1    4.34    1.20
  17  -1   1   34.78    2.77
  17   1  -1   26.94    2.19
  17  -1  -1   26.05    2.25
  17   1   1   26.31    2.28
  19  -1   1   64.99    4.01
  19   1  -1   72.62    4.09
  19   1   1   69.00    4.04
  19  -1  -1   70.37    4.04
   0   2  -1  928.66   30.96
   0   2   1  959.96   31.47
   0  -2  -1  965.90   31.50
   0  -2   1  964.34   31.42
   0   2  -1  872.45   31.41
   0   2  -1  947.50   31.42
   0  -2  -1  997.87   31.52
   0  -2   1  919.75   30.94
   0  -2   1  909.52   31.42
   0   2   1 1000.00   31.51
  -2   2   1   19.19    0.77
   2  -2   1   18.06    0.71
   2   2  -1   20.09    0.81
  -2   2   1   19.61    0.75
   2  -2   1   19.38    0.74
   2   2  -1   20.72    0.88
  -2  -2  -1   20.56    0.79
  -2  -2  -1   19.67    0.79
   2   2   1   19.28    0.80
  -2   2  -1   17.48    0.69
  -2  -2   1   18.33    0.88
   2  -2  -1   19.40    0.77
   2  -2  -1   19.45    0.78
   2   2   1   19.66    0.78
  -2  -2   1   19.59    0.81
  -2   2  -1   16.58    0.73
  -4  -2  -1  108.76    3.87
  -4   2   1  110.65    3.85
  -4  -2  -1  114.94    4.38
   4  -2   1  103.95    3.83
   4  -2   1  107.13    3.85
   4   2  -1  110.47    3.94
   4   2  -1  111.67    3.90
   4  -2  -1  115.66    3.86
   4  -2  -1  110.48    3.85
  -4   2  -1  104.53    3.84
  -4  -2   1  112.68    3.90
   4   2   1  118.59    3.89
  -4  -2   1  109.90    3.95
   4   2   1  115.11    3.89
   6   2  -1    8.24    0.75
   6  -2   1    9.26    0.75
  -6  -2  -1    9.73    0.75
  -6   2   1    9.35    0.73
   6  -2   1   10.07    0.77
  -6  -2  -1    9.91    0.86
   6   2  -1   10.62    0.96
  -6   2  -1    9.25    0.73
  -6   2  -1   12.14    0.99
  -6  -2   1   11.54    0.89
   6  -2  -1   11.71    0.94
   6  -2  -1   10.80    0.76
   6   2   1   11.04    0.81
   6   2   1   10.95    0.81
   6  -2  -1    9.90    0.74
  -8   2   1   38.71    1.82
   8  -2   1   40.27    1.85
  -8  -2  -1   39.04    1.90
   8   2  -1   36.91    1.91
   8   2  -1   41.75    2.06
   8  -2   1   40.78    1.82
  -8  -2  -1   40.87    2.08
  -8  -2   1   39.42    1.97
   8  -2  -1   40.57    1.83
  -8   2  -1   39.99    1.81
   8  -2  -1   43.22    2.13
  -8   2  -1   38.71    2.14
   8   2   1   39.84    1.92
   8  -2  -1   40.92    1.89
  10  -2   1    7.44    0.88
 -10   2   1    7.60    0.90
 -10  -2  -1    6.24    0.87
 -10  -2  -1    7.92    1.06
  10  -2   1    9.24    0.98
  10   2  -1    9.49    1.09
  10   2  -1    9.18    1.05
  10   2   1    8.66    1.02
 -10   2  -1    8.23    0.89
  10  -2  -1    7.14    0.94
 -10  -2   1    8.16    1.00
 -10   2  -1    6.41    1.01
 -12   2   1    3.15    0.86
 -12  -2  -1    2.50    0.90
  12   2  -1    3.03    1.03
  12  -2   1    4.91    0.97
 -12   2  -1    3.19    0.83
  12   2   1    2.74    0.98
  12  -2  -1    2.76    0.97
 -12  -2   1    3.58    0.98
  14  -2   1   32.55    2.27
 -14   2   1   33.68    2.19
 -14  -2  -1   34.09    2.26
  14   2  -1   35.05    2.40
  14  -2  -1   32.57    2.35
 -14  -2   1   33.13    2.27
 -14   2  -1   34.44    2.12
  14   2   1   34.00    2.34
 -16  -2  -1   69.48    3.52
  16  -2   1   73.10    3.64
  16   2  -1   76.47    3.76
  16  -2  -1   73.28    3.71
 -16  -2   1   76.67    3.60
  16   2   1   72.62    3.70
  18   2  -1   62.11    3.69
  18  -2   1   64.74    3.68
  18   2   1   58.83    3.74
  18  -2  -1   65.10    3.72
   1   3  -1   11.97    0.53
  -1   3   1   11.52    0.52
  -1  -3  -1   13.03    0.55
  -1  -3  -1   12.33    0.53
  -1  -3   1   11.52    0.62
  -1  -3   1   12.70    0.55
   1   3   1   12.84    0.56
   1   3   1   12.29    0.54
   1  -3  -1   11.76    0.53
   1  -3  -1   12.16    0.53
   1   3   1   12.08    0.55
  -3  -3  -1   89.02    3.30
   3  -3   1   82.05    2.88
  -3  -3  -1   88.57    2.97
   3   3  -1   86.50    2.98
  -3   3   1   85.37    2.91
   3   3  -1   83.35    3.02
   3  -3   1   80.02    2.90
  -3  -3  -1   87.19    2.95
  -3  -3   1   83.52    3.04
  -3   3  -1   74.04    2.84
   3   3   1   89.33    2.96
  -3  -3   1   85.04    2.98
   3   3   1   84.11    2.97
   3  -3  -1   80.72    2.91
  -3   3  -1   79.16    2.86
   3  -3  -1   83.12    2.91
  -5  -3  -1   15.54    0.96
  -5   3   1   14.79    0.88
   5  -3   1   15.25    0.94
   5   3  -1   17.02    1.05
  -5  -3  -1   16.46    1.06
   5  -3   1   16.16    0.94
   5  -3  -1   17.51    0.92
  -5   3  -1   15.69    1.13
   5   3   1   17.59    0.97
   5   3   1   16.95    1.03
  -5   3  -1   16.08    0.88
   5  -3  -1   16.65    0.94
  -5  -3   1   14.76    1.12
   7   3  -1   12.90    0.97
   7   3  -1   15.69    1.14
   7  -3   1   12.63    1.04
  -7  -3  -1   13.65    1.11
  -7  -3  -1   12.67    1.18
  -7   3   1   12.04    0.88
   7  -3   1   13.76    1.05
   7  -3  -1   15.21    1.02
  -7  -3   1   15.06    1.26
  -7   3  -1   14.72    1.01
   7  -3  -1   13.85    1.21
  -7   3  -1   13.44    1.14
   7   3   1   14.96    1.17
   7  -3  -1   13.14    1.07
  -9   3   1   19.87    1.35
   9  -3   1   22.80    1.39
   9   3  -1   22.40    1.50
   9   3  -1   20.04    1.54
   9  -3   1   20.48    1.41
  -9  -3  -1   23.56    1.51
  -9  -3  -1   21.86    1.55
  -9   3  -1   22.68    1.36
   9  -3  -1   22.92    1.41
  -9  -3   1   22.33    1.59
  -9   3  -1   22.69    1.69
   9   3   1   21.18    1.51
   9  -3  -1   22.93    1.63
   9  -3  -1   21.18    1.45
  11   3  -1    4.98    1.08
 -11   3   1    3.39    0.77
 -11  -3  -1    3.69    0.90
  11  -3   1    3.78    0.84
  11  -3   1    4.28    0.86
  11   3   1    4.36    0.90
 -11   3  -1    3.73    1.04
  11  -3  -1    4.84    0.91
 -11   3  -1    4.15    0.79
 -11  -3   1    4.04    0.96
  13   3  -1   30.24    2.24
  13  -3   1   32.37    2.11
 -13   3   1   30.55    1.96
 -13  -3  -1   35.13    2.16
  13   3   1   31.65    2.18
  13  -3  -1   28.88    2.15
 -13   3  -1   28.42    1.88
 -13  -3   1   33.34    2.20
 -15   3   1    5.79    1.17
  15  -3   1    5.61    1.23
 -15  -3  -1    8.51    1.33
  15   3  -1    7.18    1.38
  15  -3  -1    4.60    1.32
  15   3   1    3.06    1.28
 -15  -3   1    5.02    1.17
  17  -3   1   10.22    1.58
  17   3  -1   11.77    1.70
 -17  -3   1   10.78    1.61
  17  -3  -1    9.73    1.66
  17   3   1    8.02    1.61
  19  -3   1    7.04    1.72
  19   3  -1    8.43    1.80
  19   3   1    7.11    1.97
  19  -3  -1    6.45    1.86
   0   4   1  145.30    4.63
   0  -4   1  136.04    4.66
   0   4   1  135.83    4.69
   0   4  -1  138.10    4.62
   0  -4   1  135.69    4.66
   0   4  -1  134.43    4.64
   0  -4  -1  145.65    4.69
   0  -4  -1  141.91    4.69
   0  -4   1  141.63    4.62
   2   4  -1   28.50    1.17
  -2  -4  -1   29.98    1.16
   2   4  -1   28.48    1.21
  -2   4   1   27.93    1.10
  -2  -4  -1   29.67    1.17
  -2  -4  -1   27.95    1.13
  -2  -4   1   30.05    1.20
   2  -4  -1   29.79    1.12
   2   4   1   30.09    1.15
   2  -4  -1   29.26    1.11
  -2  -4   1   30.47    1.26
   2   4   1   30.20    1.18
   4  -4   1  213.23    7.50
   4  -4   1  221.71    7.51
  -4   4   1  221.60    7.51
  -4  -4  -1  222.15    7.57
  -4  -4  -1  229.58    8.55
  -4  -4  -1  239.24    7.62
   4   4  -1  218.24    7.60
   4   4   1  229.51    7.60
  -4  -4   1  226.85    7.66
  -4   4  -1  214.50    8.63
   4  -4  -1  213.63    8.63
  -4   4  -1  214.14    7.46
   4  -4  -1  218.86    7.52
   4  -4  -1  227.32    7.52
  -4  -4   1  235.33    7.63
   6  -4   1  216.22    7.35
  -6   4   1  210.21    7.33
  -6  -4  -1  210.30    7.40
  -6  -4  -1  225.11    8.37
   6   4  -1  228.02    8.36
   6   4  -1  207.24    7.44
   6  -4   1  209.16    7.35
   6  -4  -1  214.46    7.36
   6  -4  -1  218.55    7.35
  -6  -4   1  215.45    7.49
   6   4   1  220.41    7.45
  -6   4  -1  208.01    7.30
  -6   4  -1  211.76    8.46
  -8  -4  -1   11.36    0.98
   8  -4   1   10.07    0.85
   8   4  -1   10.92    0.99
   8   4  -1   11.97    1.11
  -8   4   1    8.71    0.77
   8  -4   1   10.14    0.84
  -8  -4  -1   11.26    1.00
   8  -4  -1    9.64    0.99
   8  -4  -1    9.92    0.82
  -8   4  -1    9.24    0.76
  -8  -4   1    9.33    0.98
   8   4   1    9.89    0.94
   8  -4  -1   10.07    0.86
  -8   4  -1    9.13    1.06
  10  -4   1   68.78    2.81
  10   4  -1   76.10    3.20
 -10   4   1   64.01    2.77
  10   4  -1   68.01    2.98
  10  -4   1   67.31    2.87
 -10  -4  -1   67.06    2.93
  10   4   1   67.72    2.94
  10  -4  -1   72.43    2.84
 -10   4  -1   69.96    3.32
 -10  -4   1   66.79    3.00
  10  -4  -1   66.06    2.87
 -10   4  -1   68.85    2.75
 -12  -4  -1   52.44    2.58
 -12   4   1   55.18    2.43
  12  -4   1   51.48    2.52
  12   4  -1   51.04    2.68
  12  -4   1   48.85    2.42
 -12   4  -1   48.66    2.34
 -12  -4   1   53.43    2.71
  12   4   1   49.37    2.59
  12  -4  -1   52.05    2.59
  14   4  -1   12.42    1.42
 -14  -4  -1   13.06    1.45
  14  -4   1   12.63    1.35
 -14   4   1    8.57    1.14
  14   4   1   13.70    1.56
  14  -4  -1   10.60    1.38
 -14   4  -1   11.65    1.23
 -14  -4   1    8.86    1.32
  16  -4   1    5.87    1.36
 -16  -4  -1    4.97    1.35
  16   4  -1    6.72    1.51
  16  -4  -1    7.01    1.44
  16   4   1    7.37    1.43
 -16  -4   1    6.59    1.35
  18  -4   1   24.72    2.15
  18   4  -1   20.80    2.13
  18   4   1   20.48    2.21
  18  -4  -1   21.73    2.24
  -1   5   1   20.97    0.87
   1   5  -1   21.56    0.93
   1   5  -1   20.81    0.89
  -1  -5  -1   22.24    0.92
  -1  -5  -1   21.84    0.93
   1   5  -1   20.07    0.86
  -1  -5  -1   23.56    0.92
  -1  -5   1   22.94    0.93
   1   5   1   23.60    0.93
   1   5   1   24.92    0.92
   1   5   1   21.85    0.93
  -1  -5   1   22.38    0.95
  -1  -5   1   23.24    0.95
   1  -5  -1   22.65    0.88
   1  -5  -1   22.66    0.88
   3   5  -1   18.91    1.00
  -3  -5  -1   19.68    0.93
  -3   5   1   17.83    0.81
  -3  -5  -1   19.38    0.89
  -3  -5  -1   19.53    0.96
  -3  -5  -1   19.85    0.90
   3   5   1   19.99    0.91
  -3   5  -1   18.13    1.10
   3  -5  -1   18.17    0.84
   3  -5  -1   20.27    0.86
   3  -5  -1   17.92    1.12
   3   5   1   18.89    0.99
  -3  -5   1   18.72    1.06
  -3  -5   1   19.33    1.02
  -5  -5  -1  158.92    5.51
   5  -5   1  145.49    5.42
   5   5  -1  153.40    5.55
  -5   5   1  157.43    5.42
   5  -5   1  158.59    5.43
  -5  -5  -1  165.60    6.19
  -5   5  -1  156.98    5.36
  -5  -5   1  167.11    5.62
   5  -5  -1  159.85    5.45
   5   5   1  159.44    5.54
   5  -5  -1  164.67    5.44
  -5   5  -1  157.86    6.31
  -7  -5  -1   76.53    3.22
   7   5  -1   73.76    2.98
  -7  -5  -1   75.99    2.94
   7  -5   1   77.11    2.84
  -7   5   1   73.30    2.78
   7  -5   1   72.76    2.84
   7   5  -1   78.80    3.22
   7  -5  -1   78.12    3.34
  -7  -5   1   75.16    3.04
  -7   5  -1   75.00    2.75
   7  -5  -1   74.87    2.82
   7  -5  -1   73.11    2.85
  -7   5  -1   76.02    3.39
   7   5   1   76.35    3.00
  -9   5   1    1.44    0.54
   9   5  -1    1.99    0.66
   9  -5   1    1.59    0.67
   9   5  -1    0.80    0.78
   9  -5   1    1.05    0.60
  -9  -5  -1    0.99    0.69
   9   5   1    1.69    0.72
  -9   5  -1    0.67    0.79
  -9  -5   1    2.07    0.79
   9  -5  -1    1.02    0.63
  -9   5  -1    1.30    0.52
   9  -5  -1    1.05    0.61
   9  -5  -1    0.48    0.41
  11   5  -1   25.81    1.86
  11  -5   1   25.70    1.60
  11   5  -1   26.11    1.74
  11  -5   1   25.06    1.70
 -11   5   1   24.71    1.52
 -11  -5  -1   24.71    1.83
 -11   5  -1   25.48    1.48
  11   5   1   25.62    1.86
  11  -5  -1   25.07    1.59
 -11   5  -1   22.66    2.00
 -11  -5   1   23.49    1.89
  11  -5  -1   23.00    1.73
 -13  -5  -1   28.43    2.18
  13   5  -1   35.24    2.34
  13  -5   1   32.77    2.11
 -13   5   1   32.73    1.94
  13   5   1   34.95    2.23
 -13  -5   1   31.84    2.31
 -13   5  -1   32.21    1.87
  13  -5  -1   27.56    2.13
  15   5  -1   15.86    1.81
 -15  -5  -1   16.10    1.62
  15  -5   1   13.62    1.51
  15   5   1   13.99    1.70
 -15  -5   1   15.82    1.63
  15  -5  -1   12.48    1.53
  17   5  -1   11.59    1.71
  17  -5   1    8.10    1.55
  17  -5  -1   11.09    1.67
 -17  -5   1   10.44    1.64
  17   5   1   10.19    1.65
  19  -5   1    1.61    1.66
  19   5  -1   -0.32    1.61
  19   5   1    2.39    1.80
  19  -5  -1    0.34    1.58
   0   6   1    2.92    0.37
   0   6  -1    2.78    0.33
   0   6   1    2.78    0.31
   0  -6   1    2.39    0.30
   0  -6  -1    2.99    0.34
   0  -6   1    2.62    0.25
   0  -6   1    2.75    0.33
   0  -6  -1    2.70    0.31
  -2  -6  -1    3.57    0.37
  -2  -6  -1    3.96    0.40
  -2  -6  -1    4.30    0.42
  -2   6   1    3.83    0.32
   2   6  -1    3.83    0.41
   2  -6  -1    3.84    0.51
  -2  -6   1    3.04    0.43
   2  -6  -1    3.16    0.32
  -2  -6   1    4.03    0.46
  -2  -6   1    2.83    0.40
   2   6   1    3.06    0.40
   2   6   1    3.52    0.39
   2  -6  -1    2.61    0.30
  -4  -6  -1  111.54    3.69
   4   6  -1  101.47    3.67
  -4   6   1   99.46    3.51
  -4  -6  -1  102.11    3.62
   4  -6   1   98.81    3.48
  -4  -6  -1  106.12    4.01
   4  -6   1   93.45    3.50
   4  -6  -1  104.34    3.54
   4  -6  -1   99.34    3.54
   4   6   1  101.90    3.66
  -4  -6   1  108.70    3.72
   4  -6  -1   98.79    4.17
  -4  -6   1  109.02    3.72
  -4   6  -1   97.22    4.16
   6  -6   1  196.17    7.13
   6   6  -1  204.84    7.28
  -6  -6  -1  219.53    8.12
   6   6  -1  226.07    8.12
  -6  -6  -1  211.72    7.24
  -6   6   1  200.33    7.10
   6  -6   1  207.85    7.13
   6  -6  -1  211.62    7.14
   6  -6  -1  202.69    8.27
  -6  -6   1  217.41    7.34
   6   6   1  212.93    7.29
   6  -6  -1  205.61    7.15
  -6   6  -1  205.55    7.04
  -6   6  -1  205.34    8.28
   8   6  -1    3.19    0.80
  -8  -6  -1    1.81    0.66
   8  -6   1    1.90    0.60
  -8   6   1    2.99    0.53
   8   6  -1    2.36    0.64
   8  -6   1    2.21    0.57
   8   6   1    2.49    0.74
   8  -6  -1    2.77    0.56
  -8   6  -1    2.41    0.82
   8  -6  -1    1.31    0.57
  -8   6  -1    2.33    0.46
   8  -6  -1    1.49    0.68
  -8  -6   1    1.73    0.71
 -10   6   1   48.07    2.10
  10  -6   1   47.26    2.22
 -10  -6  -1   46.60    2.36
  10  -6   1   51.94    2.20
  10   6  -1   50.33    2.42
  10   6  -1   46.30    2.37
  10  -6  -1   49.15    2.19
 -10   6  -1   45.90    2.65
 -10  -6   1   49.23    2.47
  10  -6  -1   48.59    2.26
 -10   6  -1   46.48    2.02
  12   6  -1   70.04    3.12
 -12  -6  -1   62.94    3.04
  12  -6   1   66.33    2.92
 -12   6   1   61.95    2.76
  12  -6   1   66.97    2.82
  12   6   1   65.94    3.06
 -12  -6   1   66.24    3.13
 -12   6  -1   60.72    2.66
  12  -6  -1   62.60    2.95
 -14  -6  -1   16.21    1.63
  14  -6   1   15.28    1.47
  14   6  -1   15.14    1.59
 -14  -6   1   14.36    1.61
  14  -6  -1   10.99    1.47
  14   6   1   13.35    1.51
  16   6  -1   16.78    1.92
  16  -6   1   15.56    1.70
 -16  -6  -1   14.81    1.73
  16  -6  -1   12.52    1.67
 -16  -6   1   15.36    1.65
  16   6   1   16.23    1.90
  18  -6   1    4.44    1.51
  18   6  -1    3.64    1.59
  18   6   1    2.15    1.59
  18  -6  -1    2.49    1.60
  -1  -7  -1   52.36    1.89
   1   7  -1   50.65    1.89
  -1  -7  -1   54.09    1.89
  -1   7   1   49.00    1.84
   1   7  -1   48.36    1.86
  -1  -7  -1   54.07    1.91
  -1  -7   1   47.65    1.93
   1   7   1   52.38    1.90
   1   7   1   54.81    1.90
  -1  -7   1   52.02    1.89
  -1   7  -1   53.12    1.88
  -1  -7   1   55.08    1.89
   1  -7  -1   51.68    2.17
   1  -7  -1   52.77    1.86
   1  -7  -1   50.62    1.86
  -3  -7  -1  202.62    6.83
  -3   7   1  198.33    6.87
  -3  -7  -1  208.67    6.96
   3   7  -1  203.23    6.98
  -3  -7  -1  216.73    6.99
   3  -7  -1  209.08    6.89
   3  -7  -1  196.17    7.95
   3  -7  -1  202.55    6.88
  -3  -7   1  198.41    7.01
   3   7   1  212.83    7.00
  -3  -7   1  208.40    7.00
  -3   7  -1  194.28    7.92
   5  -7   1  178.43    6.55
   5  -7   1  188.42    6.54
  -5  -7  -1  205.80    7.47
  -5  -7  -1  195.53    6.69
   5   7  -1  192.90    6.73
  -5   7   1  192.06    6.56
   5  -7  -1  193.43    6.59
   5  -7  -1  202.19    6.59
   5   7   1  193.39    6.72
   5  -7  -1  190.15    7.67
  -5   7  -1  188.88    7.66
  -5  -7   1  202.58    6.77
  -7  -7  -1   47.16    2.02
   7  -7   1   42.97    1.81
   7  -7   1   42.28    1.86
  -7   7   1   44.37    1.76
   7   7  -1   47.68    2.09
   7   7  -1   47.17    2.09
   7   7   1   46.05    2.10
  -7   7  -1   43.05    1.68
  -7  -7   1   47.17    2.16
   7  -7  -1   44.09    2.30
  -7   7  -1   41.40    2.34
   7  -7  -1   45.87    1.84
   7  -7  -1   42.41    1.87
   9   7  -1   17.37    1.37
   9   7  -1   15.73    1.24
  -9   7   1   15.88    1.06
  -9  -7  -1   13.86    1.22
   9  -7   1   14.21    1.14
   9  -7   1   15.64    1.23
  -9   7  -1   13.22    0.96
  -9   7  -1   14.18    1.37
  -9  -7   1   14.06    1.28
   9   7   1   14.65    1.17
   9  -7  -1   12.44    1.01
   9  -7  -1   15.56    1.15
  11   7  -1   12.15    1.13
 -11   7   1    9.77    0.92
  11  -7   1   11.22    1.03
  11   7  -1    9.20    1.18
 -11  -7  -1   11.52    1.19
  11  -7   1    9.44    1.06
 -11   7  -1    9.31    0.83
 -11   7  -1    9.41    1.35
  11  -7  -1    8.83    1.05
 -11  -7   1    9.97    1.23
  11  -7  -1   11.68    1.06
  11   7   1    8.15    1.08
 -13  -7  -1   69.56    3.27
  13  -7   1   68.20    3.16
 -13   7   1   68.19    2.96
  13   7  -1   69.46    3.39
 -13  -7   1   75.16    3.41
  13  -7  -1   65.05    3.17
  13   7   1   70.11    3.28
  15   7  -1   32.45    2.67
 -15  -7  -1   34.07    2.56
  15  -7   1   34.92    2.41
 -15  -7   1   33.57    2.61
  15  -7  -1   31.34    2.45
  15   7   1   33.33    2.62
 -17  -7  -1    2.09    1.30
  17   7  -1    1.24    1.49
  17  -7   1    1.64    1.37
  17   7   1    2.71    1.51
  17  -7  -1    1.74    1.47
 -17  -7   1    2.84    1.34
  19  -7   1    2.06    1.65
  19   7  -1    2.98    1.63
  19   7   1    4.64    1.83
  19  -7  -1   -0.35    1.74
   0  -8  -1    0.76    0.33
   0   8   1    0.97    0.29
   0  -8  -1    0.43    0.31
   0  -8   1    0.98    0.25
   0   8   1    1.16    0.33
   0   8  -1    1.24    0.34
   0  -8   1    0.66    0.32
   0  -8  -1    0.74    0.31
   0  -8   1    1.19    0.31
  -2  -8  -1   14.95    0.83
  -2  -8  -1   14.35    0.83
   2   8  -1   14.65    0.85
   2   8  -1   14.30    0.84
  -2  -8  -1   14.94    0.84
  -2   8   1   14.10    0.70
   2   8   1   14.36    0.87
   2  -8  -1   16.54    0.73
  -2  -8   1   15.03    0.86
   2   8   1   15.18    0.85
   2  -8  -1   15.41    1.04
   2  -8  -1   13.77    0.72
  -2  -8   1   13.94    0.93
  -2   8  -1   14.59    0.94
  -4  -8  -1  132.70    4.64
  -4  -8  -1  138.21    4.69
  -4  -8  -1  129.91    4.53
   4   8  -1  129.94    4.68
  -4   8   1  128.28    4.50
  -4  -8   1  138.95    4.71
   4  -8  -1  131.41    4.53
  -4  -8   1  137.24    4.72
  -4   8  -1  123.82    5.31
   4  -8  -1  129.64    4.53
   4   8   1  134.70    4.68
  -6   8   1  251.13    8.72
   6   8  -1  274.62    9.95
   6   8  -1  253.62    8.93
   6  -8   1  253.56    8.72
  -6  -8  -1  266.89    8.90
   6  -8   1  245.30    8.74
   6  -8  -1  264.39   10.18
   6  -8  -1  254.20    8.77
   6  -8  -1  264.07    8.77
   6   8   1  264.94    8.95
  -6  -8   1  262.61    8.97
  -6   8  -1  248.65   10.16
   8  -8   1    7.53    0.72
  -8  -8  -1    7.67    0.86
   8   8  -1    8.16    0.82
  -8   8   1    6.76    0.62
   8  -8   1    7.02    0.74
   8   8  -1    7.28    0.90
  -8  -8   1    7.12    1.01
  -8   8  -1    6.33    1.04
   8  -8  -1    6.42    0.77
   8   8   1    9.08    1.00
  -8   8  -1    8.12    0.66
   8  -8  -1    7.33    0.72
   8  -8  -1    7.24    1.00
 -10   8   1    3.43    0.63
  10   8  -1    2.65    0.85
  10  -8   1    3.32    0.69
  10   8  -1    4.59    0.80
  10  -8   1    2.44    0.77
 -10  -8  -1    3.23    0.88
 -10  -8   1    3.46    0.97
 -10   8  -1    2.58    0.53
 -10   8  -1    3.27    0.98
  10  -8  -1    3.21    0.69
  10   8   1    3.78    0.99
  10  -8  -1    2.74    0.76
  12   8  -1  135.22    5.10
  12  -8   1  132.50    4.85
 -12  -8  -1  130.50    5.08
 -12   8   1  122.42    4.72
  12  -8   1  129.40    4.89
 -12  -8   1  130.47    5.12
  12  -8  -1  123.42    4.91
 -12   8  -1  123.73    4.64
  12   8   1  134.34    5.10
  12  -8  -1  128.55    5.02
  14   8  -1   51.59    2.98
 -14  -8  -1   50.93    2.86
  14  -8   1   48.27    2.70
 -14  -8   1   48.24    2.90
  14  -8  -1   43.28    2.70
  14   8   1   51.46    2.89
 -16  -8  -1   23.65    1.95
  16  -8   1   17.61    1.76
  16   8  -1   20.12    1.97
 -16  -8   1   20.63    1.92
  16   8   1   24.53    2.21
  16  -8  -1   16.88    1.84
  18   8  -1    0.84    1.64
  18  -8   1    0.14    1.47
  18   8   1    2.55    1.62
 -18  -8   1    2.33    1.54
  18  -8  -1   -0.44    1.61
  -1  -9  -1    3.61    0.43
  -1   9   1    2.94    0.34
   1   9  -1    3.87    0.39
   1   9  -1    3.91    0.49
  -1  -9  -1    4.00    0.43
  -1  -9  -1    2.61    0.39
   1   9   1    3.86    0.48
   1  -9  -1    4.42    0.39
  -1   9  -1    4.33    0.47
  -1  -9   1    4.30    0.46
  -1  -9   1    4.18    0.42
   1  -9  -1    4.23    0.53
   1  -9  -1    4.26    0.40
   1   9   1    4.01    0.45
  -3  -9  -1  106.44    3.64
  -3  -9  -1  104.35    3.57
  -3  -9  -1  108.62    3.67
  -3   9   1  100.18    3.51
   3   9  -1  100.74    3.66
  -3  -9   1  100.49    3.67
   3  -9  -1  104.31    3.55
  -3   9  -1   96.99    4.15
   3  -9  -1  100.72    4.18
  -3  -9   1  101.43    3.71
   3  -9  -1   99.71    3.54
   3   9   1  104.46    3.67
   5   9  -1  209.85    7.30
  -5   9   1  206.38    7.09
  -5  -9  -1  214.00    7.26
  -5  -9  -1  209.04    7.11
  -5   9  -1  196.12    8.30
   5  -9  -1  222.01    7.15
   5  -9  -1  208.52    8.31
   5  -9  -1  205.80    7.13
   5   9   1  212.32    7.30
  -5  -9   1  216.68    7.33
  -5  -9   1  210.16    7.36
   7   9  -1   54.92    2.41
   7  -9   1   53.74    2.11
  -7   9   1   53.54    2.06
   7  -9   1   50.98    2.14
   7   9  -1   58.66    2.43
  -7  -9  -1   57.17    2.39
   7  -9  -1   54.72    2.19
   7  -9  -1   54.33    2.72
   7   9   1   56.54    2.46
  -7   9  -1   55.85    2.80
   7  -9  -1   54.65    2.15
  -7  -9   1   58.30    2.49
  -9  -9  -1   -0.19    0.78
   9   9  -1    0.94    0.76
  -9   9   1    0.45    0.45
   9  -9   1    0.24    0.61
   9   9  -1   -0.13    0.55
   9  -9   1   -0.22    0.52
  -9   9  -1    0.70    0.39
  -9  -9   1    1.01    0.92
   9  -9  -1    0.40    0.52
  -9   9  -1    1.07    0.89
   9   9   1   -0.73    0.74
   9  -9  -1    0.04    0.62
  11   9  -1   40.30    2.10
  11   9  -1   36.97    2.22
  11  -9   1   36.53    2.00
 -11   9   1   32.72    1.69
  11  -9   1   37.51    1.89
 -11  -9  -1   34.54    2.22
 -11   9  -1   33.40    1.61
  11  -9  -1   34.63    2.05
  11  -9  -1   36.64    1.88
 -11   9  -1   35.67    2.54
 -11  -9   1   39.17    2.34
  11   9   1   36.90    2.24
 -13  -9  -1   89.62    3.99
  13  -9   1   88.86    3.75
  13   9  -1   90.40    4.00
  13   9   1   91.42    3.95
 -13  -9   1   92.94    4.03
  13  -9  -1   83.57    3.81
  15  -9   1   27.23    2.25
  15   9  -1   27.82    2.16
 -15  -9  -1   20.12    1.85
  15   9   1   30.72    2.32
  15  -9  -1   21.28    1.93
 -15  -9   1   24.03    2.07
  17  -9   1    4.33    1.55
 -17  -9  -1    4.72    1.59
  17   9  -1    6.10    1.60
 -17  -9   1    5.05    1.60
  17  -9  -1    4.99    1.58
  17   9   1    4.23    1.50
  19  -9   1    4.94    1.75
  19   9  -1    4.91    1.75
  19   9   1    8.11    1.99
  19  -9  -1    4.95    1.93
   0 -10   1   51.04    1.91
   0  10  -1   49.52    1.81
   0 -10  -1   51.74    2.12
   0 -10  -1   53.08    1.92
   0  10   1   52.02    1.95
   0 -10   1   50.36    1.85
   0  10  -1   54.35    1.96
   0 -10  -1   50.64    1.90
   0  10   1   49.70    1.90
  -2  10   1    7.81    0.53
   2  10  -1    7.59    0.59
  -2 -10  -1    7.37    0.59
   2  10  -1    6.51    0.61
  -2 -10  -1    6.95    0.58
  -2 -10  -1    5.94    0.54
  -2 -10   1    6.86    0.58
   2  10   1    5.50    0.56
  -2 -10   1    7.30    0.62
  -2  10  -1    5.94    0.65
   2 -10  -1    7.58    0.71
  -2 -10   1    6.44    0.62
   2 -10  -1    5.58    0.47
   2  10   1    7.53    0.61
   2 -10  -1    5.36    0.46
   4  10  -1  103.31    3.86
  -4 -10  -1  111.55    3.89
  -4 -10  -1  103.91    3.74
  -4 -10  -1  108.49    3.84
  -4  10   1  105.01    3.66
   4  10   1  110.41    3.89
   4 -10  -1  109.89    3.71
  -4 -10   1  102.19    3.89
   4 -10  -1  102.73    3.70
  -4 -10   1  109.41    3.89
  -4 -10   1  106.88    3.76
  -4  10  -1  104.72    4.42
  -6  10   1  215.43    7.37
  -6 -10  -1  218.91    7.42
  -6 -10  -1  223.90    7.59
   6 -10   1  212.60    7.36
   6  10  -1  212.34    7.62
   6 -10   1  212.68    7.38
   6  10  -1  231.01    8.42
   6 -10  -1  214.25    8.69
   6 -10  -1  213.68    7.43
   6  10   1  227.75    7.66
  -6  10  -1  209.30    8.70
  -6 -10   1  223.65    7.67
   6 -10  -1  221.00    7.44
  -8 -10  -1    6.58    0.94
   8 -10   1    5.44    0.68
   8 -10   1    6.84    0.64
   8  10  -1    5.19    0.85
   8  10  -1    6.82    0.74
  -8  10   1    5.70    0.56
  -8 -10   1    5.91    0.94
  -8  10  -1    5.57    1.02
   8 -10  -1    6.83    0.68
   8  10   1    6.02    0.91
   8 -10  -1    5.90    0.73
  10 -10   1   45.86    2.13
  10 -10   1   44.78    2.21
  10  10  -1   50.91    2.40
 -10  10   1   48.95    2.00
 -10 -10  -1   48.56    2.49
  10  10  -1   51.05    2.50
  10  10   1   50.18    2.55
  10 -10  -1   47.98    2.27
  10 -10  -1   46.67    2.14
 -10  10  -1   47.91    2.86
 -10 -10   1   51.54    2.60
 -12 -10  -1   28.55    2.23
  12  10  -1   29.52    2.20
  12  10  -1   29.67    1.96
  12 -10   1   29.01    1.83
  12 -10   1   28.85    1.94
  12  10   1   27.58    2.24
 -12 -10   1   29.56    2.30
  12 -10  -1   24.97    2.01
  14  10  -1   16.66    1.74
  14 -10   1   13.30    1.46
 -14 -10  -1   17.12    1.65
 -14 -10   1   15.76    1.83
  14 -10  -1   14.23    1.57
  14  10   1   13.77    1.69
  16  10  -1    4.25    1.48
 -16 -10  -1    7.72    1.56
  16 -10   1    4.34    1.42
  16 -10  -1    6.97    1.62
  16  10   1    6.77    1.47
 -16 -10   1    4.35    1.55
  18  10  -1    5.03    1.78
  18 -10   1    6.55    1.68
 -18 -10  -1    7.60    1.73
  18  10   1    6.91    1.87
 -18 -10   1    7.24    1.78
  18 -10  -1    6.68    1.78
   1 -11   1   15.64    0.76
   1 -11   1   14.08    0.71
  -1 -11  -1   16.33    0.90
  -1  11   1   15.31    0.94
   1  11  -1   15.13    0.83
   1  11  -1   14.22    1.00
  -1 -11  -1   16.15    0.89
  -1  11   1   14.80    0.79
  -1 -11  -1   15.12    0.91
   1  11   1   15.44    0.92
  -1 -11   1   14.47    0.90
  -1  11  -1   14.27    1.02
  -1  11  -1   15.05    0.94
  -1 -11   1   14.95    0.86
   1  11   1   14.47    0.97
  -1 -11   1   15.48    0.95
   1 -11  -1   15.51    0.84
   1 -11  -1   14.26    1.01
  -3 -11  -1    9.47    0.73
  -3  11   1    8.69    0.60
   3  11  -1    8.76    0.71
  -3 -11  -1    9.22    0.71
  -3 -11  -1    8.99    0.71
  -3  11  -1    8.91    0.86
  -3 -11   1    8.31    0.68
   3 -11  -1    8.17    0.66
   3  11   1    7.41    0.67
  -3 -11   1    8.90    0.80
  -3 -11   1    8.66    0.73
   3  11   1   12.54    0.98
   3 -11  -1    6.68    0.76
   3 -11  -1    8.44    0.66
  -5  11   1   28.78    1.16
  -5 -11  -1   30.90    1.39
   5  11  -1   28.36    1.52
  -5 -11  -1   30.75    1.51
  -5 -11   1   25.84    1.29
  -5  11  -1   26.14    1.78
   5  11   1   27.98    1.58
  -5 -11   1   29.62    1.58
   5 -11  -1   27.85    1.26
  -5 -11   1   29.02    1.58
   5 -11  -1   26.45    1.26
   5 -11  -1   30.50    1.78
   7  11  -1   57.91    2.38
   7 -11   1   53.18    2.10
  -7 -11  -1   53.19    2.24
   7  11  -1   54.44    2.43
  -7 -11  -1   54.44    2.38
  -7  11   1   55.24    2.03
   7 -11   1   54.12    2.06
   7 -11  -1   55.34    2.16
  -7  11  -1   51.88    2.81
   7 -11  -1   53.78    2.14
   7 -11  -1   53.19    2.77
   7  11   1   53.01    2.47
  -7 -11   1   54.16    2.48
  -9 -11  -1    3.52    0.91
   9 -11   1    2.65    0.68
   9  11  -1    3.98    0.87
   9  11  -1    3.63    0.68
   9 -11   1    3.35    0.64
  -9  11   1    2.93    0.52
   9 -11  -1    3.40    0.65
  -9 -11   1    3.39    1.01
  -9  11  -1    3.06    1.04
   9  11   1    2.11    0.85
   9 -11  -1    2.27    0.70
  11  11  -1   22.91    1.58
 -11 -11  -1   18.79    1.54
  11  11  -1   22.15    1.63
 -11  11   1   18.54    1.20
  11 -11   1   17.99    1.41
  11 -11   1   19.69    1.61
 -11  11  -1   19.68    1.82
  11 -11  -1   16.34    1.34
  11 -11  -1   15.22    1.24
  11  11   1   18.81    1.57
 -11 -11   1   16.12    1.52
  13  11  -1   11.54    1.48
 -13 -11  -1   11.61    1.49
  13 -11   1   11.64    1.33
  13  11   1    9.27    1.32
 -13 -11   1   13.90    1.69
  13 -11  -1   13.39    1.43
  15  11  -1    5.26    1.44
  15 -11   1    3.64    1.28
 -15 -11  -1    4.99    1.35
  15 -11  -1    4.14    1.38
 -15 -11   1    8.19    1.62
  15  11   1    8.19    1.62
  17  11  -1    4.56    1.71
  17 -11   1    1.59    1.47
 -17 -11  -1    1.77    1.45
  17  11   1    1.95    1.60
 -17 -11   1    2.41    1.60
  17 -11  -1    2.41    1.64
   0  12   1  242.16    8.34
   0 -12   1  255.87    8.33
   0  12   1  241.43    8.27
   0  12  -1  245.92    9.45
   0 -12  -1  256.83    8.35
   0 -12   1  240.28    8.29
   0  12  -1  246.42    8.27
   0 -12  -1  240.68    8.33
  -2 -12  -1   21.67    1.13
  -2 -12  -1   21.39    1.10
  -2  12   1   17.76    0.91
  -2 -12  -1   19.76    1.10
   2  12  -1   19.76    1.07
   2  12  -1   22.13    1.18
   2  12   1   18.93    1.13
  -2 -12   1   21.67    1.19
   2 -12  -1   18.73    1.22
   2 -12  -1   21.01    0.98
   2 -12  -1   19.10    0.97
  -2  12  -1   20.22    1.11
  -2  12  -1   18.82    1.31
   2  12   1   20.96    1.16
  -2 -12   1   19.32    1.10
  -2 -12   1   19.28    1.11
  -4 -12  -1   48.38    1.98
  -4  12   1   42.62    1.65
  -4 -12  -1   46.95    1.95
  -4 -12  -1   45.75    1.86
   4  12  -1   42.42    1.93
   4 -12  -1   41.65    1.73
   4  12   1   46.84    1.98
   4 -12  -1   44.43    2.25
  -4  12  -1   45.32    2.28
  -4 -12   1   45.01    1.84
  -4 -12   1   47.48    2.01
  -4 -12   1   45.74    2.03
   4 -12  -1   44.27    1.74
  -6  12   1   60.52    2.23
   6  12  -1   62.10    2.61
  -6 -12  -1   60.36    2.44
   6  12   1   62.15    2.67
  -6  12  -1   59.69    3.04
   6 -12  -1   65.94    2.35
   6 -12  -1   60.73    2.97
  -6 -12   1   62.33    2.68
   6 -12  -1   62.32    2.35
  -8 -12  -1    8.99    1.04
   8  12  -1    9.23    0.79
   8  12  -1    7.40    0.99
   8 -12   1    6.79    0.66
  -8  12   1    7.37    0.58
   8 -12   1    6.48    0.71
  -8  12  -1    6.85    1.21
   8  12   1    7.50    1.07
  -8 -12   1    7.19    1.11
   8 -12  -1    5.77    0.74
   8 -12  -1    6.50    0.71
 -10 -12  -1    5.05    1.13
 -10  12   1    5.55    0.63
  10  12  -1    5.82    1.01
  10  12  -1    8.10    0.91
  10 -12   1    4.54    0.82
  10 -12   1    5.19    0.77
 -10  12  -1    8.91    1.41
  10 -12  -1    5.98    0.92
 -10 -12   1    6.21    1.22
  10 -12  -1    5.90    0.80
  10  12   1    5.74    1.10
  12  12  -1   12.02    1.20
 -12 -12  -1   11.72    1.40
  12  12  -1   12.35    1.55
  12 -12   1   10.90    1.23
  12 -12  -1   11.88    1.30
 -12 -12   1   12.08    1.56
  12  12   1   14.58    1.64
  14  12  -1    6.27    1.54
 -14 -12  -1    5.56    1.51
  14 -12   1    3.78    1.19
 -14 -12   1    4.49    1.40
  14  12   1    5.20    1.29
  14 -12  -1    4.34    1.32
  16  12  -1   18.59    2.01
 -16 -12  -1   19.80    2.12
  16 -12   1   16.89    1.79
 -16 -12   1   13.70    1.81
  16 -12  -1   12.89    1.82
  16  12   1   14.32    1.78
 -18 -12  -1   23.65    2.30
  18  12  -1   22.71    2.36
  18 -12   1   25.29    2.34
  18  12   1   25.28    2.40
  18 -12  -1   26.07    2.45
 -18 -12   1   19.70    2.17
  -1  13   1  121.23    4.39
   1 -13   1  118.98    4.28
   1  13  -1  125.72    4.40
  -1 -13  -1  129.10    4.41
  -1 -13  -1  124.97    4.39
  -1  13   1  120.51    4.34
   1 -13   1  124.40    4.30
   1  13  -1  125.21    4.34
  -1  13  -1  128.72    5.02
   1 -13  -1  129.65    4.37
   1 -13  -1  123.73    4.94
  -1 -13   1  130.39    4.40
  -1 -13   1  129.90    4.42
   1  13   1  125.19    4.42
   1  13   1  121.17    4.38
  -1 -13   1  123.83    4.37
   1 -13  -1  125.59    4.36
  -3 -13  -1   51.14    2.03
  -3 -13  -1   47.31    2.01
  -3  13   1   45.47    1.78
   3  13  -1   45.37    1.99
  -3 -13  -1   49.69    1.98
   3  13   1   49.71    2.01
   3 -13  -1   49.48    1.86
  -3 -13   1   46.70    2.01
   3  13   1   52.09    2.07
  -3 -13   1   51.16    2.10
   3 -13  -1   45.59    1.85
  -3 -13   1   49.92    1.98
  -3  13  -1   46.69    2.34
  -5 -13  -1   10.26    0.82
  -5 -13  -1   11.31    0.90
   5  13  -1    9.20    0.87
  -5 -13   1    9.21    0.76
   5  13   1    9.99    0.93
  -5 -13   1    9.66    0.96
   5 -13  -1   11.28    1.10
   5 -13  -1   11.60    0.82
  -5 -13   1   11.10    0.96
  -5  13  -1   10.70    1.11
   5 -13  -1   10.00    0.83
   7 -13   1   15.97    0.96
  -7 -13  -1   14.24    1.11
   7 -13   1   15.85    0.90
   7  13  -1   13.77    1.14
   7 -13  -1   16.52    1.05
   7 -13  -1   14.76    1.36
  -7 -13   1   13.30    1.29
  -7  13  -1   11.71    1.40
   7  13   1   14.92    1.30
   7 -13  -1   13.38    1.08
   9 -13   1    0.00    0.64
   9 -13   1    1.34    0.59
   9  13  -1    0.60    0.90
  -9 -13  -1    0.50    0.85
   9  13  -1    1.46    0.62
   9 -13  -1    0.10    0.66
   9 -13  -1    0.94    0.59
  -9  13  -1   -0.64    1.01
   9  13   1    0.70    0.96
  -9 -13   1    0.40    0.91
  11 -13   1    9.43    0.96
 -11 -13  -1    8.12    1.24
  11 -13   1   10.69    1.11
  11  13  -1   10.47    1.46
  11  13  -1   10.36    1.06
  11  13   1   10.23    1.37
 -11 -13   1    9.70    1.43
  11 -13  -1    7.49    1.07
 -13 -13  -1   14.02    1.58
  13 -13   1   14.70    1.40
  13  13  -1   15.19    1.59
  13 -13  -1   12.19    1.45
 -13 -13   1   11.85    1.53
  13  13   1   14.36    1.67
  15 -13   1    2.54    1.35
  15  13  -1    2.32    1.39
 -15 -13  -1    2.37    1.30
  15 -13  -1    4.51    1.38
  15  13   1    3.44    1.37
 -15 -13   1    3.05    1.46
  17 -13   1   14.29    1.93
 -17 -13  -1   12.06    1.89
  17  13  -1   14.98    2.07
  17 -13  -1   12.27    1.96
  17  13   1   13.10    1.82
 -17 -13   1   13.64    2.07
   0 -14  -1   95.28    3.28
   0 -14   1   91.92    3.24
   0  14   1   90.80    3.28
   0  14  -1   90.93    3.31
   0  14   1   89.86    3.31
   0 -14  -1   91.68    3.27
   0 -14   1   87.09    3.21
   0  14  -1   87.09    3.69
  -2 -14  -1   13.95    1.05
   2  14  -1   14.01    0.95
  -2 -14  -1   13.28    0.99
  -2  14   1   11.06    0.82
   2  14  -1   12.26    0.93
  -2  14   1   10.42    0.88
   2 -14   1   12.85    0.73
  -2 -14  -1   14.40    1.03
   2  14   1   13.61    1.08
   2  14   1   15.21    1.08
  -2 -14   1   12.61    1.02
   2 -14  -1   12.29    0.87
   2 -14  -1   14.45    1.07
  -2  14  -1   11.84    1.04
  -2  14  -1   12.56    1.01
  -2 -14   1   15.14    1.06
  -2 -14   1   13.20    1.00
  -4 -14  -1    0.88    0.53
  -4 -14  -1    2.59    0.65
   4  14  -1    1.69    0.58
  -4 -14  -1    1.45    0.60
   4 -14  -1    1.84    0.44
   4 -14  -1    1.69    0.44
   4 -14  -1    1.37    0.67
   4  14   1    1.48    0.65
  -4 -14   1    2.08    0.62
  -4 -14   1    0.76    0.49
  -4  14  -1    0.83    0.72
  -4 -14   1    1.38    0.64
  -6 -14  -1    4.30    0.81
   6  14  -1    4.29    0.82
   6 -14  -1    3.87    0.58
  -6  14  -1    2.44    0.96
   6 -14  -1    3.80    0.89
  -6 -14   1    3.29    0.81
   6  14   1    5.27    0.87
   6 -14  -1    3.54    0.56
   8 -14   1   15.33    1.02
   8  14  -1   12.50    1.23
  -8 -14  -1   16.23    1.29
   8 -14   1   14.79    1.08
  -8  14  -1   14.23    1.59
  -8 -14   1   13.11    1.35
   8 -14  -1   13.06    0.99
   8  14   1   15.32    1.34
   8 -14  -1   14.47    1.13
  10 -14   1   26.37    1.65
  10  14  -1   27.29    2.02
  10 -14   1   26.36    1.53
  10  14  -1   30.30    1.66
 -10 -14  -1   25.57    2.12
  10 -14  -1   23.70    1.69
 -10 -14   1   28.71    2.24
 -10  14  -1   23.61    2.11
  10 -14  -1   26.38    1.59
  10  14   1   26.88    2.13
  12 -14   1    4.88    1.07
  12  14  -1    6.95    1.25
 -12 -14  -1    8.35    1.49
  12  14   1    7.48    1.44
 -12 -14   1    7.67    1.37
  12 -14  -1    6.13    1.15
  14 -14   1    4.49    1.32
  14  14  -1    9.17    1.58
 -14 -14  -1    4.74    1.41
  14 -14  -1    6.02    1.38
 -14 -14   1    6.14    1.50
  14  14   1    7.03    1.53
  16  14  -1   21.42    2.06
  16 -14   1   20.57    1.97
 -16 -14  -1   18.70    2.05
  16  14   1   19.74    2.17
  16 -14  -1   20.46    2.03
 -16 -14   1   18.63    2.03
  18  14  -1    4.69    1.85
 -18 -14  -1    2.47    1.67
  18 -14   1    5.05    1.89
  18 -14  -1    5.52    1.93
  18  14   1    5.00    1.97
 -18 -14   1    4.38    1.69
   1  15  -1  259.73    8.80
  -1 -15  -1  279.78    8.90
  -1  15   1  250.90    8.79
  -1 -15  -1  264.58    8.87
  -1  15   1  254.91    8.81
   1 -15   1  263.02    8.77
   1 -15   1  249.69    8.75
   1  15  -1  261.67    8.79
   1 -15  -1  253.46    8.81
  -1 -15   1  261.50    8.80
   1  15   1  252.14    8.78
   1  15   1  260.73    8.88
  -1 -15   1  247.29    8.82
   1 -15  -1  272.48    8.84
  -1 -15   1  270.20    8.87
  -1  15  -1  260.08   10.09
  -1  15  -1  254.06    8.78
  -3 -15  -1    6.13    0.76
  -3 -15  -1    7.84    0.80
   3  15  -1    5.57    0.83
   3  15  -1    6.43    0.71
  -3 -15  -1    9.65    0.88
   3 -15  -1    5.99    0.60
   3  15   1    7.37    0.82
  -3 -15   1    6.07    0.79
   3  15   1    7.76    0.82
  -3  15  -1    6.88    0.96
   3 -15  -1    7.14    0.81
  -3 -15   1    6.70    0.74
   3 -15  -1    5.22    0.57
  -3  15  -1    5.96    0.69
   5  15  -1    7.18    0.86
  -5 -15  -1    9.50    0.93
   5  15   1   11.78    1.08
  -5 -15   1   10.37    1.08
   5 -15  -1    8.62    0.69
  -5 -15   1    9.30    0.99
  -5  15  -1    7.77    1.10
   5 -15  -1   11.66    0.87
   5 -15  -1   10.55    1.08
  -7 -15  -1   31.55    1.82
   7  15  -1   32.39    1.88
  -7  15  -1   29.15    2.25
  -7 -15   1   28.22    1.94
   7  15   1   31.53    1.98
   7 -15  -1   27.65    1.43
   7 -15  -1   26.88    1.47
   9  15  -1    7.72    1.21
   9 -15   1    5.97    0.71
  -9 -15  -1    5.72    1.04
   9 -15   1    6.18    0.75
  -9  15  -1    5.95    1.37
   9 -15  -1    6.40    0.89
   9 -15  -1    6.47    0.80
  -9 -15   1    8.55    1.22
   9  15   1    6.41    1.22
  11  15  -1   16.27    1.63
 -11 -15  -1   13.98    1.45
  11 -15   1   12.73    1.09
  11 -15   1   14.24    1.21
 -11 -15   1   14.79    1.73
  11  15   1   12.82    1.48
  11 -15  -1   13.94    1.25
  13  15  -1   12.22    1.60
  13 -15   1   14.96    1.44
 -13 -15  -1   10.62    1.57
  13 -15  -1   10.97    1.43
 -13 -15   1   14.84    1.73
  13  15   1   12.21    1.48
 -15 -15  -1    8.52    1.66
  15  15  -1   11.80    1.79
  15 -15   1   11.50    1.60
  15 -15  -1    9.81    1.66
 -15 -15   1   11.13    1.84
  15  15   1   10.09    1.70
 -17 -15  -1   27.44    2.59
  17  15  -1   27.21    2.41
  17 -15   1   32.67    2.46
 -17 -15   1   27.07    2.39
  17 -15  -1   28.89    2.45
  17  15   1   31.24    2.71
   0 -16   1  155.15    5.38
   0  16  -1  154.39    6.15
   0  16   1  150.60    5.44
   0  16   1  153.61    5.44
   0 -16   1  162.07    5.40
   0  16  -1  152.76    5.45
   0 -16  -1  153.76    5.44
   0 -16  -1  161.50    5.45
  -2 -16  -1   58.78    2.24
   2  16  -1   51.36    2.27
   2 -16   1   54.14    1.99
   2 -16   1   54.32    1.99
  -2  16   1   51.38    2.05
  -2 -16  -1   54.61    2.21
  -2  16   1   52.47    2.23
   2  16  -1   50.11    2.11
  -2 -16   1   52.26    2.18
  -2  16  -1   53.20    2.60
   2 -16  -1   49.90    2.09
  -2  16  -1   51.87    2.22
   2  16   1   52.51    2.23
   2 -16  -1   52.91    2.09
  -2 -16   1   58.65    2.25
   2  16   1   51.27    2.23
   4  16  -1   14.12    1.06
  -4 -16  -1   12.20    0.99
   4 -16  -1   15.32    0.97
  -4 -16   1   11.55    1.01
  -4  16  -1   14.51    1.16
   4  16   1   13.96    1.11
   4 -16  -1   12.52    0.98
  -4 -16   1   13.85    1.10
  -4  16  -1   13.22    1.28
   6  16  -1    4.04    0.87
  -6 -16  -1    5.03    0.85
   6 -16  -1    4.28    0.62
   6 -16  -1    4.46    0.60
  -6 -16   1    5.06    0.91
  -6  16  -1    5.32    1.10
   6 -16  -1    2.49    0.91
   6  16   1    5.79    1.04
   8  16  -1    6.17    1.01
   8 -16   1    6.45    0.69
  -8 -16  -1    7.24    1.06
   8 -16  -1    5.76    0.76
   8  16   1    7.03    1.25
  -8 -16   1    5.96    1.08
   8 -16  -1    5.88    0.79
  -8  16  -1    4.65    1.29
 -10 -16  -1   16.03    1.64
  10  16  -1   16.28    1.42
  10 -16   1   17.28    1.40
  10 -16   1   16.14    1.30
  10 -16  -1   17.69    1.30
 -10 -16   1   12.99    1.57
  10  16   1   16.01    1.62
  12  16  -1    4.08    1.20
  12 -16   1    3.66    1.03
 -12 -16  -1    2.37    1.32
  12  16   1    4.47    1.17
  12 -16  -1    2.31    1.10
 -12 -16   1    1.27    1.26
  14 -16   1    6.77    1.38
  14  16  -1    7.70    1.65
 -14 -16  -1    8.77    1.56
  14  16   1    6.60    1.40
  14 -16  -1    6.09    1.47
 -14 -16   1    6.91    1.65
  16 -16   1    9.14    1.74
 -16 -16  -1    6.56    1.82
  16  16  -1    7.89    1.81
  16  16   1   11.32    1.91
  16 -16  -1    8.77    1.83
 -16 -16   1    6.15    1.81
   1  17  -1    3.00    0.77
   1 -17   1    3.94    0.54
   1  17  -1    3.43    0.52
  -1  17   1    3.89    0.71
  -1  17   1    2.74    0.60
   1 -17   1    4.38    0.55
  -1 -17  -1    2.77    0.65
  -1 -17  -1    3.62    0.64
   1  17   1    4.02    0.78
  -1 -17   1    3.58    0.63
   1  17   1    3.81    0.66
  -1  17  -1    4.23    0.79
   1 -17  -1    1.99    0.60
   1 -17  -1    3.19    0.62
  -1  17  -1    4.37    0.74
  -1 -17   1    4.14    0.62
  -3  17   1    1.49    0.64
  -3 -17  -1    2.61    0.73
   3 -17   1    2.66    0.46
  -3 -17  -1    1.77    0.67
   3 -17   1    2.02    0.43
   3  17  -1    0.81    0.75
   3  17  -1    1.84    0.62
  -3  17  -1    2.53    0.69
   3 -17  -1    2.22    0.55
  -3  17  -1    1.26    0.81
  -3 -17   1    2.26    0.65
  -3 -17   1    2.06    0.69
   3  17   1    1.35    0.67
   3  17   1    2.58    0.72
   5  17  -1   13.08    1.15
  -5 -17  -1   14.71    1.16
  -5 -17   1   15.03    1.28
  -5 -17   1   18.35    1.37
   5 -17  -1   17.12    1.09
  -5  17  -1   15.75    1.46
   5  17   1   15.14    1.25
   5 -17  -1   18.56    1.08
  -7 -17  -1    6.87    0.99
   7  17  -1    7.27    1.04
  -7 -17   1    6.14    1.10
   7 -17  -1    5.53    0.73
  -7  17  -1    7.20    1.34
   7 -17  -1    8.32    0.80
   7  17   1    8.37    1.20
  -9 -17  -1    7.20    1.17
   9 -17   1    8.01    0.80
   9 -17   1    9.78    0.86
   9  17  -1    6.23    1.17
   9 -17  -1    8.51    0.87
  -9 -17   1   10.64    1.37
   9  17   1    8.04    1.29
   9 -17  -1    8.22    0.94
  -9  17  -1    7.08    1.63
  11 -17   1   32.12    1.92
 -11 -17  -1   33.72    2.51
  11 -17  -1   34.97    2.13
 -11 -17   1   31.99    2.68
  13 -17   1   15.49    1.46
  13  17  -1   13.36    1.69
 -13 -17  -1   15.14    1.75
  13 -17  -1   15.46    1.61
  13  17   1   16.99    1.91
 -13 -17   1   13.09    1.72
  15  17  -1    1.64    1.54
  15 -17   1    5.14    1.43
 -15 -17  -1    3.29    1.49
 -15 -17   1    2.39    1.62
  15 -17  -1    3.52    1.55
  15  17   1    3.75    1.40
  17 -17   1    2.16    1.69
  17  17  -1    1.80    1.72
 -17 -17  -1    0.04    1.79
  17  17   1    0.58    1.79
  17 -17  -1    1.06    1.82
 -17 -17   1    5.01    1.80
   0 -18   1  236.93    7.95
   0  18  -1  233.18    9.02
   0  18   1  230.30    7.97
   0 -18  -1  228.56    7.98
   0 -18   1  228.07    7.93
   0 -18  -1  244.39    8.01
   0  18   1  224.55    7.98
   0  18  -1  228.59    7.97
  -2 -18  -1   18.46    1.27
   2  18  -1   13.35    1.13
   2 -18   1   17.01    0.99
  -2 -18  -1   17.49    1.31
   2 -18   1   17.46    1.01
  -2  18   1   16.34    1.33
   2  18  -1   16.86    1.13
   2 -18  -1   17.64    1.12
  -2  18  -1   12.20    1.07
   2  18   1   13.31    1.12
   2  18   1   16.57    1.32
  -2 -18   1   17.66    1.26
  -2 -18   1   16.53    1.25
   2 -18  -1   13.94    1.12
  -2  18  -1   17.23    1.56
   4  18  -1   32.94    1.84
  -4  18   1   34.21    1.82
  -4 -18  -1   38.46    1.92
  -4 -18   1   36.56    1.94
  -4  18  -1   33.06    1.81
  -4 -18   1   35.32    1.90
   4  18   1   37.01    1.99
   4 -18  -1   37.34    1.61
   4 -18  -1   34.95    1.63
  -4  18  -1   33.19    2.29
  -6 -18  -1   19.38    1.65
   6  18  -1   21.29    1.68
   6 -18  -1   21.28    1.31
   6  18   1   21.11    1.59
  -6  18  -1   17.90    1.72
  -6 -18   1   21.17    1.77
   6 -18  -1   22.15    1.28
   8  18  -1    7.38    1.09
  -8 -18  -1    8.40    1.21
   8 -18  -1    5.93    0.87
   8  18   1    8.13    1.32
  -8 -18   1    7.91    1.27
   8 -18  -1    7.94    0.86
  -8  18  -1    6.62    1.48
  10  18  -1    1.02    1.02
 -10 -18  -1    0.81    1.20
  10 -18   1    2.14    0.73
  10 -18   1    1.88    0.82
  10  18   1    2.81    1.13
  10 -18  -1    2.59    0.90
 -10 -18   1    2.73    1.28
  12  18  -1   10.70    1.63
 -12 -18  -1   10.07    1.70
  12 -18   1   10.97    1.24
  12  18   1   11.87    1.48
 -12 -18   1   10.06    1.64
  12 -18  -1   11.04    1.37
  14 -18   1    7.70    1.49
  14  18  -1   12.37    1.76
 -14 -18  -1   11.06    1.91
 -14 -18   1   10.18    1.84
  14  18   1    8.77    1.71
  14 -18  -1   11.21    1.68
 -16 -18  -1    5.81    1.66
  16 -18   1    4.75    1.72
  16  18  -1    6.69    1.76
  16 -18  -1    5.48    1.86
  16  18   1    3.58    1.47
 -16 -18   1    4.70    1.62
  -1  19   1   38.33    1.81
   1 -19   1   39.81    1.77
  -1 -19  -1   42.74    1.91
   1 -19   1   40.66    1.76
   1  19  -1   41.87    2.05
  -1 -19  -1   40.08    1.91
   1  19  -1   42.08    1.70
  -1  19   1   39.98    2.00
  -1  19  -1   39.93    2.19
  -1 -19   1   38.91    1.87
  -1 -19   1   38.06    1.84
  -1  19  -1   42.95    2.02
   1 -19  -1   44.42    1.87
   1  19   1   39.91    2.03
   1 -19  -1   42.75    1.89
   1  19   1   39.04    1.93
  -3 -19  -1    0.88    0.72
   3  19  -1    1.94    0.80
  -3 -19  -1    1.70    0.73
   3 -19   1    2.43    0.52
   3  19  -1    2.49    0.67
  -3  19   1    2.81    0.80
   3 -19   1    3.35    0.54
   3 -19  -1    3.40    0.62
  -3  19  -1    2.98    0.80
  -3  19  -1    1.18    0.94
   3 -19  -1    3.08    0.65
   3  19   1    3.19    0.82
  -3 -19   1    2.87    0.77
  -3 -19   1    3.78    0.78
   3  19   1    3.29    0.86
  -5 -19  -1   48.40    2.37
   5  19  -1   44.52    2.28
  -5  19  -1   45.42    2.82
   5  19   1   50.73    2.51
  -5 -19   1   50.09    2.45
  -5 -19   1   49.70    2.43
   5 -19  -1   46.17    2.05
   5 -19  -1   51.51    2.04
  -5  19  -1   46.43    2.25
  -7 -19  -1    3.72    1.03
   7  19  -1    3.51    1.01
   7 -19  -1    0.74    0.71
  -7 -19   1    2.99    1.08
   7 -19  -1    2.46    0.73
   7  19   1    3.87    1.19
  -7  19  -1    3.39    1.32
   9  19  -1    6.51    1.24
   9 -19   1    8.04    0.82
   9 -19   1    8.62    0.85
  -9 -19  -1    8.35    1.32
   9 -19  -1    6.98    1.01
   9  19   1   10.69    1.45
  -9 -19   1    6.82    1.31
  11 -19   1   -0.21    0.91
 -11 -19  -1    2.65    1.27
  11  19  -1    0.46    1.20
  11 -19  -1   -0.69    1.02
 -11 -19   1    1.50    1.29
  11  19   1   -0.25    1.19
  13 -19   1   12.81    1.45
  13  19  -1   13.25    1.82
 -13 -19  -1   10.09    1.66
  13 -19  -1    7.72    1.47
 -13 -19   1    6.01    1.61
  13  19   1   10.59    1.78
  15 -19   1    8.13    1.63
 -15 -19  -1    8.62    1.75
 -15 -19   1    6.58    1.71
  15 -19  -1    4.37    1.70
  15  19   1    4.38    1.57
   0  20   1    6.19    0.89
   0 -20  -1    5.61    0.80
   0  20   1    6.08    0.81
   0 -20   1    6.27    0.72
   0  20  -1    6.87    0.93
   0 -20   1    5.63    0.76
   0 -20  -1    6.35    0.82
   2  20  -1    4.43    0.66
   2 -20   1    4.73    0.63
  -2  20   1    4.92    0.89
  -2 -20  -1    4.34    0.79
   2 -20   1    5.72    0.65
   2  20  -1    4.57    0.89
  -2 -20  -1    3.35    0.78
   2  20   1    3.95    0.94
  -2 -20   1    4.04    0.81
  -2  20  -1    5.05    1.03
   2 -20  -1    4.52    0.69
   2  20   1    3.69    0.84
  -2  20  -1    4.21    0.88
  -2 -20   1    4.11    0.78
   2 -20  -1    4.70    0.73
   4  20  -1    6.55    0.90
  -4  20   1    6.96    0.95
   4 -20   1    6.18    0.63
  -4 -20  -1    5.96    0.96
  -4 -20   1    4.01    0.94
   4  20   1    3.99    0.99
  -4  20  -1    4.56    0.90
  -4  20  -1    5.35    1.19
   4 -20  -1    5.90    0.71
  -4 -20   1    4.96    0.96
   6  20  -1   29.51    1.94
  -6 -20  -1   30.69    1.97
   6  20   1   35.56    2.19
   6 -20  -1   29.53    1.56
  -6 -20   1   28.72    2.10
   6 -20  -1   24.80    1.59
  -6  20  -1   29.03    1.87
  -8 -20  -1    2.46    1.07
   8  20  -1    2.95    1.01
   8 -20  -1    0.30    0.78
   8  20   1    2.46    1.07
  -8 -20   1    3.29    1.14
  10  20  -1   16.99    1.69
 -10 -20  -1   16.52    1.76
  10 -20  -1   23.29    1.80
 -10 -20   1   17.93    1.89
  10  20   1   17.92    1.65
  12  20  -1   17.78    1.99
  12 -20   1   17.75    1.44
  12 -20  -1   17.05    1.59
 -12 -20   1   13.62    1.80
  12  20   1   15.19    1.72
 -14 -20  -1    1.81    1.61
  14 -20   1    1.99    1.41
 -14 -20   1    2.47    1.79
  14  20   1    4.58    1.51
  14 -20  -1    0.44    1.46
  -1 -21  -1    0.99    0.71
   1  21  -1    1.21    0.84
   1 -21   1    0.88    0.64
  -1 -21  -1    0.85    0.74
  -1  21   1    0.02    0.82
   1 -21   1    0.32    0.57
   1  21   1   -0.18    0.73
  -1 -21   1    1.28    0.73
   1  21   1    1.80    0.90
   1 -21  -1    1.83    0.72
   1 -21  -1    0.37    0.66
  -1  21  -1    0.39    0.78
  -1 -21   1    0.56    0.68
   3  21  -1    4.58    1.06
   3  21  -1    5.62    0.81
  -3 -21  -1    4.22    0.90
   3 -21   1    5.04    0.67
   3 -21   1    5.22    0.64
  -3  21   1    4.69    0.96
  -3 -21   1    3.95    0.89
   3 -21  -1    3.93    0.75
  -3 -21   1    4.12    0.91
   3 -21  -1    3.43    0.70
  -3  21  -1    4.61    0.92
   3  21   1    3.41    0.98
   3  21   1    5.53    1.01
  -5 -21  -1   79.78    3.36
   5  21  -1   78.33    3.30
  -5  21   1   75.10    3.30
   5  21   1   82.32    3.50
  -5 -21   1   82.03    3.44
   5 -21  -1   83.20    3.07
  -5  21  -1   75.41    3.28
  -7 -21  -1   36.19    2.32
   7  21  -1   36.48    2.31
  -7 -21   1   38.63    2.46
   7  21   1   40.46    2.46
   7 -21  -1   33.92    1.91
  -9 -21  -1    3.70    1.20
   9  21   1    3.03    1.17
  -9 -21   1    2.30    1.28
   9 -21  -1    4.34    0.93
 -11 -21  -1   33.56    2.69
  11 -21  -1   29.73    2.14
 -11 -21   1   26.19    2.34
  11  21   1   22.49    2.02
  13 -21   1   13.07    1.46
 -13 -21  -1    9.83    1.82
 -13 -21   1    8.81    1.69
  13 -21  -1   13.15    1.61
 -15 -21  -1    2.86    1.70
  15 -21   1    5.28    1.60
  15 -21  -1    0.33    1.65
 -15 -21   1    3.33    1.65
   0 -22   1    2.92    0.72
   0 -22   1    3.07    0.80
   0  22  -1    4.38    0.98
   0 -22  -1    2.41    0.79
   0  22   1    3.58    0.96
   2  22  -1    3.91    1.06
   2 -22   1    3.85    0.72
   2 -22   1    4.58    0.70
  -2  22   1    2.24    0.90
  -2 -22  -1    3.82    0.90
   2  22   1    4.65    1.08
  -2  22  -1    2.29    0.93
  -2 -22   1    2.28    0.83
   2 -22  -1    2.39    0.72
   2 -22  -1    4.10    0.82
  -4  22   1   15.09    1.42
  -4 -22  -1   16.98    1.37
   4 -22  -1   19.60    1.40
  -4  22  -1   15.45    1.36
  -4 -22   1   13.64    1.30
   4 -22  -1   20.10    1.30
   4  22   1   13.97    1.52
  -6  22   1   59.82    2.77
  -6 -22  -1   53.76    2.80
  -6  22  -1   54.08    2.74
   6  22   1   60.48    3.04
  -6 -22   1   57.52    2.91
   6 -22  -1   55.18    2.47
  -8 -22  -1    6.36    1.29
  -8 -22   1    6.05    1.30
   8 -22  -1    2.83    0.87
 -10 -22  -1    0.68    1.33
  10 -22   1    0.19    0.71
  10 -22  -1   -0.26    0.90
 -10 -22   1    3.25    1.33
  12 -22   1   36.52    2.26
 -12 -22  -1   37.29    3.05
  12 -22  -1   36.70    2.29
 -12 -22   1   27.43    2.55
  14 -22   1   20.26    1.80
 -14 -22  -1   19.72    2.34
 -14 -22   1   15.55    2.09
  14 -22  -1   17.44    1.97
   1 -23   1    1.36    0.70
  -1 -23  -1    2.35    0.89
   1 -23   1    1.50    0.76
   1  23  -1    0.37    0.99
  -1  23   1    1.73    0.96
   1  23   1    2.62    1.06
   1 -23  -1    0.63    0.83
  -1  23  -1    0.67    0.91
  -1 -23   1    1.11    0.83
   3 -23   1   14.63    1.16
  -3 -23  -1   10.41    1.22
   3  23  -1   12.97    1.43
  -3  23   1   10.65    1.27
   3 -23   1   12.19    0.96
   3 -23  -1   13.74    1.13
  -3  23  -1    9.79    1.26
  -3 -23   1   10.83    1.18
   3  23   1   13.06    1.40
  -5  23   1   58.10    2.80
  -5 -23  -1   53.30    2.80
  -5  23  -1   53.05    2.74
  -5 -23   1   55.73    2.88
   5 -23  -1   61.03    2.52
  -7 -23  -1    7.74    1.32
  -7 -23   1   10.41    1.48
  -7  23  -1    6.60    1.22
   7 -23  -1    8.84    1.01
  -9 -23  -1    4.74    1.35
  -9 -23   1    2.25    1.31
   9 -23  -1    3.47    0.96
 -11 -23  -1    5.86    1.51
 -11 -23   1    4.50    1.74
  11 -23  -1    4.77    1.12
 -13 -23  -1   19.82    2.17
  13 -23  -1   22.02    1.76
 -13 -23   1   19.43    2.34
   0 -24   1   20.09    1.66
   0  24   1   20.76    1.61
   0  24  -1   21.10    1.58
   0 -24  -1   23.32    1.74
   2  24  -1    2.77    1.16
  -2  24   1    1.86    1.06
  -2 -24  -1    4.19    1.02
   2 -24   1    4.32    0.83
   2  24   1    2.49    1.16
   2 -24  -1    3.17    0.93
  -2 -24   1    3.22    0.97
  -2  24  -1    3.91    1.11
  -4  24   1   29.86    2.27
  -4 -24  -1   30.74    2.22
   4 -24   1   37.04    1.73
   4 -24   1   37.91    1.78
   4 -24  -1   36.06    1.94
  -4 -24   1   34.51    2.30
  -4  24  -1   33.62    2.27
  -6 -24  -1   41.32    2.49
  -6  24   1   37.39    2.44
  -6 -24   1   36.78    2.58
  -6  24  -1   38.62    2.44
   6 -24  -1   41.15    2.12
  -8 -24  -1    3.26    1.26
   8 -24  -1    0.87    0.92
  -8 -24   1    5.18    1.39
  -8  24  -1   -0.94    1.17
 -10 -24  -1    2.60    1.60
  10 -24  -1    1.95    1.03
 -10 -24   1    1.50    1.59
 -12 -24  -1   15.03    2.04
  12 -24  -1   15.14    1.52
 -12 -24   1   15.47    2.20
  -1  25   1    3.40    1.08
  -1 -25  -1    1.86    0.99
   1 -25   1    2.42    0.92
   1  25  -1    2.85    1.16
  -1 -25   1    3.19    0.99
   1  25   1    3.92    1.24
   1 -25  -1    1.13    0.96
  -1  25  -1    2.32    1.11
  -3 -25  -1    3.14    1.14
  -3  25   1    4.63    1.23
   3 -25   1    3.91    0.89
  -3  25  -1    3.65    1.16
  -3 -25   1    5.45    1.15
   3  25   1    7.42    1.36
   3 -25  -1    3.79    1.02
  -5 -25  -1   35.19    2.40
  -5  25   1   38.42    2.46
  -5 -25   1   37.22    2.53
  -5  25  -1   35.39    2.42
   5 -25  -1   43.47    2.13
  -7 -25  -1   14.99    1.71
  -7  25   1   13.81    1.59
  -7  25  -1   17.43    1.72
  -7 -25   1   14.54    1.69
  -9 -25  -1    4.39    1.40
   9 -25  -1    2.53    1.00
  -9 -25   1    2.48    1.59
  -9  25  -1    2.02    1.31
 -11 -25  -1   12.58    1.80
  11 -25  -1   11.86    1.36
 -11 -25   1    9.99    1.90
  13 -25  -1   30.28    2.51
   0 -26  -1   10.63    1.25
   0  26   1    9.22    1.38
   0 -26   1    9.75    1.17
   0  26  -1    8.65    1.41
  -2 -26  -1    2.18    1.09
  -2  26   1    1.43    1.23
   2 -26   1    2.42    0.94
   2  26  -1    2.69    1.32
   2 -26  -1    2.07    1.01
  -2 -26   1    1.08    1.05
  -2  26  -1    2.01    1.14
   2  26   1    1.77    1.22
  -4  26   1   23.10    1.83
  -4 -26  -1   26.54    2.15
  -4  26  -1   26.01    1.91
  -4 -26   1   21.34    1.81
   4 -26  -1   29.68    1.92
  -6  26   1   15.48    1.68
  -6 -26  -1   14.65    1.59
   6 -26  -1   14.70    1.34
  -6 -26   1   14.87    1.67
  -6  26  -1   17.88    1.67
  -8 -26  -1   -0.73    1.28
  -8  26   1    2.71    1.30
  -8 -26   1    1.89    1.45
  -8  26  -1    1.15    1.20
 -10 -26  -1    0.56    1.55
  10 -26  -1    1.08    1.10
 -10  26  -1    1.84    1.38
 -10 -26   1    1.27    1.57
 -12 -26  -1    5.34    1.74
  12 -26  -1    6.42    1.39
 -12 -26   1    2.35    1.75
   1  27  -1   12.27    1.68
   1 -27   1   12.24    1.27
  -1  27   1   12.20    1.48
  -1 -27  -1   13.12    1.38
   1  27   1   10.51    1.60
   1 -27  -1   11.69    1.34
  -1  27  -1   13.10    1.60
  -1 -27   1   11.73    1.35
  -3 -27  -1    4.67    1.29
  -3  27   1    6.47    1.40
   3 -27   1    6.39    1.05
  -3  27  -1    6.03    1.33
   3  27   1    6.50    1.53
   3 -27  -1    5.85    1.15
  -3 -27   1    5.09    1.28
  -5 -27  -1   10.09    1.44
  -5  27   1   13.52    1.68
   5 -27  -1   14.24    1.36
  -5  27  -1   14.22    1.61
  -5 -27   1   14.55    1.65
  -7 -27  -1    5.45    1.44
  -7  27   1    7.36    1.52
  -7 -27   1    4.13    1.63
  -7  27  -1    6.75    1.40
   7 -27  -1    9.39    1.28
  -9 -27  -1    3.12    1.57
  -9  27   1    2.24    1.48
  -9  27  -1    1.33    1.42
  -9 -27   1    0.63    1.59
 -11 -27  -1    6.03    1.75
 -11  27  -1    6.04    1.65
 -11 -27   1    5.61    1.96
  11 -27  -1    7.97    1.37
   0  28  -1    2.34    1.41
   0 -28   1    3.64    1.16
   0 -28  -1    2.09    1.20
   0  28   1    3.15    1.46
   2  28  -1    4.61    1.61
   2 -28   1    5.59    1.15
  -2  28   1    5.60    1.32
  -2 -28  -1    4.68    1.27
   2  28   1    5.29    1.54
  -2  28  -1    5.07    1.31
  -2 -28   1    4.10    1.26
   2 -28  -1    4.23    1.21
  -4  28   1   -1.11    1.29
   4 -28   1   -0.04    0.99
  -4 -28  -1    2.20    1.29
  -4  28  -1   -0.40    1.25
  -4 -28   1    1.89    1.32
   4 -28  -1   -0.15    1.11
  -6 -28  -1    1.43    1.34
  -6  28   1   -1.39    1.34
  -6 -28   1    0.37    1.47
   6 -28  -1    1.13    1.18
  -6  28  -1    0.46    1.34
  -8 -28  -1    0.15    1.43
  -8  28   1   -1.04    1.41
  -8  28  -1    1.41    1.46
  -8 -28   1    2.24    1.72
   8 -28  -1    0.46    1.19
 -10 -28  -1    2.16    1.82
 -10  28   1    2.17    1.61
 -10 -28   1    4.27    1.98
 -10  28  -1   -0.15    1.45
  -1  29   1   48.20    2.90
   1 -29   1   46.15    2.57
   1  29  -1   41.99    3.10
  -1 -29  -1   43.33    2.73
   1 -29  -1   38.06    2.62
   1  29   1   43.59    3.00
  -1 -29   1   40.02    2.66
  -1  29  -1   44.44    2.89
   3 -29   1    1.38    1.14
  -3  29   1    1.95    1.41
  -3 -29  -1    2.01    1.27
  -3  29  -1    0.45    1.33
  -3 -29   1    0.01    1.31
   3 -29  -1   -2.00    1.17
   3  29   1    0.22    1.54
  -5 -29  -1    1.91    1.36
  -5  29   1    2.59    1.37
  -5  29  -1    1.05    1.30
   5 -29  -1    2.39    1.23
  -5 -29   1    1.64    1.52
  -7  29   1    3.19    1.49
  -7 -29  -1    6.22    1.72
  -7 -29   1    3.63    1.72
   7 -29  -1    6.55    1.35
  -7  29  -1    6.11    1.52
  -9  29   1    0.39    1.50
  -9 -29  -1   -0.93    1.57
  -9 -29   1    1.02    1.81
   9 -29  -1   -0.16    1.33
  -9  29  -1   -1.41    1.49
   0  30  -1   15.11    1.84
   0  30   1   16.08    1.82
   0 -30  -1   11.27    1.61
   0 -30   1   12.53    1.52
   2 -30   1    2.41    1.24
   2  30  -1   -0.18    1.57
  -2  30   1    0.66    1.44
  -2 -30  -1    3.05    1.35
  -2 -30   1    3.05    1.40
   2  30   1    0.64    1.64
  -2  30  -1    1.82    1.51
   2 -30  -1   -1.85    1.31
  -4  30   1    3.07    1.47
  -4 -30  -1    2.64    1.46
  -4  30  -1    4.85    1.52
   4 -30  -1    3.42    1.31
  -4 -30   1    3.25    1.51
  -6 -30  -1   -0.49    1.44
  -6  30   1   -2.15    1.38
  -6  30  -1   -1.10    1.37
   6 -30  -1    0.85    1.27
  -6 -30   1    1.21    1.59
  -1  31   1    9.40    1.74
   1  31  -1    9.40    1.97
   1 -31   1   11.47    1.53
  -1 -31  -1   10.15    1.61
   1  31   1   11.22    1.85
   1 -31  -1    9.04    1.60
  -1  31  -1   10.27    1.75
  -1 -31   1   10.22    1.58
   3 -31   1    1.53    1.28
  -3 -31  -1    0.71    1.39
  -3  31   1   -0.74    1.50
   3 -31  -1   -0.24    1.38
  -3 -31   1    1.75    1.49
  -3  31  -1    1.10    1.41
  -5 -31  -1    2.03    1.59
  -5  31   1    2.96    1.64
  -5 -31   1    0.70    1.63
   5 -31  -1    2.70    1.41
  -5  31  -1    4.71    1.57
   0  32   1   56.57    3.50
   0 -32   1   56.66    3.16
   0 -32  -1   52.88    3.30
   0  32  -1   53.50    3.55
  -2 -32  -1    5.29    1.63
  -2  32   1    5.97    1.68
   2 -32   1    6.58    1.45
  -2 -32   1    8.16    1.68
   2  32   1    3.59    1.88
  -2  32  -1   10.00    1.91
   2 -32  -1    5.11    1.60
  -4 -32  -1    0.07    1.54
   4 -32  -1    0.78    1.48
  -4 -32   1    0.35    1.66
   0   0   2    5.77    0.37
   0   0  -2    5.56    0.38
   0   0  -2    5.33    0.35
   0   0   2    5.33    0.39
   2   0   2    0.20    0.21
  -2   0   2    0.58    0.29
   2   0   2    0.45    0.23
  -2   0  -2    0.86    0.23
  -2   0   2    0.71    0.25
   2   0  -2    0.53    0.26
   2   0  -2    0.77    0.29
   4   0   2   12.18    0.73
   4   0  -2   13.00    0.80
  -4   0   2   11.76    0.86
   4   0   2   11.07    0.72
   4   0  -2   13.79    0.84
  -4   0  -2   12.30    0.70
   6   0  -2  231.15    7.76
  -6   0   2  218.08    7.77
  -6   0  -2  219.83    7.72
   6   0   2  223.78    7.72
   6   0   2  237.02    7.74
  -6   0  -2  225.29    8.79
   8   0   2  127.51    4.45
  -8   0   2  117.68    4.48
   8   0  -2  122.66    5.04
   8   0   2  120.88    4.44
  -8   0  -2  120.44    5.04
   8   0  -2  120.61    4.47
  -8   0  -2  125.22    4.43
 -10   0  -2   92.51    3.52
  10   0  -2   87.12    3.61
  10   0   2   91.25    3.57
 -10   0  -2   90.01    4.04
 -10   0   2   91.16    3.61
 -12   0   2  117.62    4.56
  12   0   2  112.88    4.53
 -12   0  -2  120.32    4.49
  12   0  -2  113.84    4.60
 -12   0  -2  116.65    5.12
  14   0  -2    7.94    1.35
 -14   0   2    9.91    1.26
  14   0   2    5.35    1.17
 -14   0  -2    9.88    1.22
  16   0  -2    0.37    1.33
  16   0   2   -0.15    1.23
 -16   0   2   -0.90    1.14
  18   0   2    8.23    1.71
  18   0  -2    7.22    1.74
  -1   1   2   15.52    0.68
  -1   1   2   13.71    0.68
   1  -1   2   15.32    0.65
   1  -1   2   14.94    0.64
  -1  -1  -2   15.17    0.66
   1   1  -2   15.16    0.69
   1   1  -2   15.45    0.66
  -1  -1  -2   15.07    0.67
   1   1   2   16.25    0.69
  -1  -1   2   15.68    0.70
  -1   1  -2   16.02    0.63
   1  -1  -2   16.11    0.68
   1  -1  -2   16.68    0.70
  -1  -1   2   16.32    0.67
   1   1   2   17.14    0.69
  -3   1   2   15.37    0.76
  -3  -1  -2   15.37    0.72
   3  -1   2   14.08    0.70
   3   1  -2   15.35    0.80
  -3  -1  -2   15.07    0.75
  -3   1   2   16.81    0.82
   3  -1   2   16.47    0.71
   3   1  -2   15.35    0.86
   3   1   2   16.10    0.74
  -3   1  -2   14.33    0.64
   3  -1  -2   15.18    0.80
   3   1   2   14.93    0.76
  -3  -1   2   15.03    0.79
   3  -1  -2   15.41    0.79
  -3   1  -2   13.12    0.70
  -3  -1   2   15.21    0.87
   5  -1   2   45.30    1.80
   5  -1   2   44.78    1.78
   5   1  -2   47.39    1.88
  -5   1   2   47.91    1.87
  -5  -1  -2   46.41    1.81
  -5  -1   2   45.78    1.93
  -5   1  -2   44.56    1.79
   5  -1  -2   47.13    1.84
   5   1   2   46.27    1.82
   5   1   2   48.98    1.82
   5  -1  -2   48.95    1.87
  -7   1   2   74.02    2.83
   7  -1   2   76.28    2.77
  -7  -1  -2   72.90    3.14
   7  -1   2   73.37    2.76
  -7  -1  -2   75.95    2.78
  -7  -1   2   66.59    2.86
   7   1   2   76.11    2.78
  -7   1  -2   70.02    3.16
   7  -1  -2   72.51    2.81
  -7   1  -2   68.45    2.74
   7   1   2   72.12    2.79
  -9  -1  -2   33.05    1.93
  -9   1   2   31.85    1.75
   9   1  -2   35.16    1.90
  -9  -1  -2   32.04    1.67
   9  -1   2   30.55    1.72
   9   1  -2   31.37    1.79
   9  -1   2   31.93    1.64
   9  -1  -2   31.14    1.88
   9   1   2   35.23    1.77
  -9  -1   2   31.94    1.82
  -9   1  -2   32.57    1.94
   9  -1  -2   31.99    1.77
  -9   1  -2   31.28    1.63
 -11   1   2   66.60    2.93
  11   1  -2   64.14    2.98
  11  -1   2   65.77    2.88
 -11  -1  -2   68.78    3.27
 -11  -1  -2   67.20    2.87
  11  -1  -2   67.71    2.98
 -11   1  -2   68.55    2.83
 -11  -1   2   66.08    2.97
 -11   1  -2   65.26    3.29
  11   1   2   67.50    2.93
 -13   1   2    8.34    1.18
 -13  -1  -2    7.53    1.25
  13   1  -2    9.03    1.24
  13  -1   2    8.94    1.17
 -13  -1  -2    8.63    1.14
 -13   1  -2    7.24    1.25
 -13   1  -2    9.22    1.12
 -13  -1   2   10.29    1.24
  13   1   2    8.33    1.16
  13  -1  -2    9.49    1.28
 -15  -1  -2   12.95    1.41
 -15   1   2   11.74    1.49
  15  -1   2   13.28    1.56
  15   1  -2   11.67    1.52
 -15  -1   2   11.10    1.41
  15   1   2   12.23    1.53
  15  -1  -2   12.33    1.54
  17   1  -2    7.87    1.60
  17  -1   2    6.11    1.55
  17   1   2    5.49    1.48
  17  -1  -2    7.43    1.75
  19  -1   2    2.27    1.77
  19   1  -2    5.40    1.85
  19   1   2    0.06    1.78
  19  -1  -2    3.43    1.73
   0   2   2   21.50    0.80
   0  -2  -2   19.85    0.80
   0  -2   2   17.66    0.72
   0   2  -2   19.81    0.75
   0  -2  -2   20.83    0.81
   0   2   2   19.55    0.81
   0  -2   2   19.03    0.76
   0  -2   2   18.01    0.77
  -2  -2  -2   25.87    1.06
  -2  -2  -2   26.44    1.05
   2   2  -2   26.18    1.12
   2  -2   2   24.78    0.99
  -2   2   2   26.81    1.08
   2   2  -2   25.52    1.06
  -2   2   2   26.08    1.05
   2  -2   2   23.71    0.98
   2  -2  -2   28.47    1.09
  -2  -2   2   28.65    1.14
  -2  -2   2   27.55    1.06
   2   2   2   27.81    1.07
  -2   2  -2   25.20    0.97
   2  -2  -2   27.86    1.07
   2   2   2   28.63    1.08
  -2   2  -2   27.23    0.97
   4  -2   2   13.76    0.72
   4   2  -2   13.20    0.86
  -4   2   2   14.61    0.82
   4  -2   2   13.51    0.72
  -4  -2  -2   13.89    0.79
  -4  -2   2   13.53    0.80
   4   2   2   13.74    0.80
   4  -2  -2   12.72    0.81
  -4   2  -2   13.09    0.72
   4  -2  -2   12.82    0.80
  -4  -2   2   12.66    0.98
   4   2   2   14.38    0.78
  -6  -2  -2  379.45   14.41
   6  -2   2  385.89   12.69
   6   2  -2  374.73   12.74
  -6  -2  -2  373.17   12.70
  -6   2   2  379.35   12.72
   6  -2   2  360.20   12.66
  -6   2  -2  363.07   12.67
  -6   2  -2  369.34   14.45
   6  -2  -2  388.12   12.72
   6  -2  -2  375.27   12.70
   6   2   2  399.86   12.73
   6   2   2  370.90   12.71
  -6  -2   2  373.22   12.79
   8  -2   2   93.60    3.52
   8  -2   2   95.30    3.55
   8   2  -2   99.86    4.01
   8   2  -2   91.20    3.61
  -8   2   2   95.02    3.57
  -8  -2  -2   95.14    4.02
  -8  -2  -2   98.38    3.57
  -8  -2   2   93.45    3.67
   8   2   2   95.71    3.59
   8  -2  -2   95.15    3.59
   8  -2  -2   97.09    4.07
  -8   2  -2   90.36    3.49
  -8   2  -2   93.15    4.07
  10   2  -2  169.93    6.42
 -10  -2  -2  174.51    6.37
  10  -2   2  184.74    6.36
 -10   2   2  177.08    6.37
 -10  -2  -2  180.49    7.22
  10   2  -2  180.62    7.20
  10  -2   2  171.70    6.35
 -10   2  -2  181.56    6.32
 -10   2  -2  176.44    7.28
  10  -2  -2  176.83    6.41
 -10  -2   2  180.69    6.46
  10   2   2  177.09    6.42
 -12  -2  -2   92.19    4.14
 -12  -2  -2   89.54    3.67
 -12   2   2   88.01    3.67
  12   2  -2   89.04    3.80
  12  -2   2   86.45    3.67
  12  -2  -2   88.90    3.76
  12   2   2   87.94    3.73
 -12   2  -2   94.05    3.62
 -12  -2   2   92.58    3.79
 -12   2  -2   87.62    4.18
 -14   2   2   18.28    1.60
  14  -2   2   17.98    1.55
  14   2  -2   18.12    1.74
 -14  -2  -2   19.95    1.60
  14   2   2   17.72    1.68
  14  -2  -2   14.09    1.56
 -14  -2   2   21.35    1.72
 -14   2  -2   14.98    1.36
  16   2  -2   21.54    1.96
  16  -2   2   15.67    1.68
 -16  -2   2   18.46    1.76
  16  -2  -2   17.53    1.85
  16   2   2   18.25    1.90
  18  -2   2    5.75    1.69
  18   2  -2    9.41    1.85
  18   2   2    4.98    1.66
  18  -2  -2   10.97    1.92
   1   3  -2   10.92    0.56
   1  -3   2   10.44    0.51
  -1   3   2   11.31    0.58
  -1  -3  -2   11.29    0.53
  -1  -3  -2   11.27    0.62
   1  -3   2   11.01    0.50
  -1  -3  -2   10.81    0.61
  -1   3   2   10.46    0.60
  -1   3  -2   10.92    0.49
  -1  -3   2   11.04    0.57
   1  -3  -2   12.30    0.62
  -1   3  -2   11.69    0.51
  -1   3  -2   10.72    0.47
   1   3   2   10.77    0.54
   1   3   2   10.81    0.62
  -1  -3   2   11.63    0.66
   1  -3  -2   11.28    0.59
   1   3   2   12.35    0.63
  -3  -3  -2  171.07    5.68
   3  -3   2  156.06    5.60
  -3  -3  -2  168.73    5.68
   3   3  -2  168.47    5.68
  -3   3   2  163.81    5.67
   3  -3   2  162.40    5.61
  -3  -3   2  171.34    5.76
  -3  -3   2  171.31    5.69
   3   3   2  175.23    5.68
   3  -3  -2  168.91    5.67
   3  -3  -2  176.82    5.68
  -3   3  -2  161.83    5.58
  -3   3  -2  157.68    5.60
   3   3   2  163.87    5.68
  -5  -3  -2  108.89    3.98
   5   3  -2  113.94    4.03
   5  -3   2  113.08    3.94
   5  -3   2  107.62    3.92
  -5   3   2  113.85    3.98
  -5   3  -2  107.85    3.93
   5  -3  -2  118.70    3.99
   5   3   2  111.55    4.00
   5  -3  -2  115.19    3.98
   5   3   2  120.99    4.01
  -5  -3   2  113.57    4.11
  -7  -3  -2  155.50    6.14
  -7  -3  -2  152.44    5.43
   7  -3   2  155.41    5.41
   7  -3   2  151.78    5.39
   7   3  -2  153.44    5.48
  -7   3   2  155.97    5.42
   7  -3  -2  157.84    5.43
  -7   3  -2  149.86    5.37
  -7  -3   2  153.61    5.56
  -7   3  -2  150.97    6.20
   7  -3  -2  155.94    6.20
   7  -3  -2  157.82    5.44
  -9   3   2   78.26    3.11
   9  -3   2   76.55    3.10
   9  -3   2   81.10    3.09
  -9  -3  -2   83.03    3.54
   9   3  -2   84.34    3.51
  -9  -3  -2   73.87    3.11
   9   3  -2   76.40    3.20
  -9   3  -2   74.55    3.59
   9  -3  -2   80.45    3.58
  -9   3  -2   79.92    3.05
  -9  -3   2   80.48    3.29
   9   3   2   79.10    3.19
   9  -3  -2   80.29    3.16
  11  -3   2    8.86    1.01
 -11  -3  -2   11.49    1.16
 -11   3   2    7.99    0.99
 -11  -3  -2    9.82    1.13
  11   3  -2    8.82    1.12
  11  -3   2   10.24    1.02
  11  -3  -2    6.70    1.03
  11   3   2    6.49    1.03
 -11   3  -2   11.05    0.98
 -11  -3   2    9.26    1.14
 -11   3  -2    7.80    1.17
  13   3  -2   17.70    1.60
 -13   3   2   16.47    1.47
 -13  -3  -2   17.44    1.42
  13  -3   2   17.87    1.49
 -13   3  -2   15.06    1.63
 -13  -3   2   14.57    1.44
  13  -3  -2   15.86    1.58
  13   3   2   17.78    1.62
 -13   3  -2   20.21    1.60
 -15  -3  -2    8.40    1.35
  15   3  -2    8.13    1.43
 -15   3   2    5.79    1.14
  15  -3   2    6.85    1.30
 -15  -3   2    6.33    1.35
  15  -3  -2    6.32    1.42
  15   3   2    5.13    1.23
  17   3  -2    2.89    1.45
  17  -3   2    3.80    1.41
 -17  -3   2    2.37    1.34
  17   3   2    2.35    1.47
  17  -3  -2    4.09    1.53
  19  -3   2    1.90    1.61
  19   3  -2   -1.35    1.59
  19  -3  -2    0.43    1.76
  19   3   2   -1.05    1.62
   0   4  -2    0.79    0.17
   0   4  -2    0.41    0.23
   0  -4  -2    0.35    0.27
   0  -4   2    0.77    0.20
   0  -4   2    0.64    0.26
   0  -4   2    1.02    0.24
   0   4   2    0.77    0.27
   0   4   2    0.69    0.24
   0   4  -2    0.68    0.26
   0  -4  -2    0.68    0.27
   2   4  -2   91.44    3.23
  -2  -4  -2   92.32    3.25
  -2   4   2   94.05    3.23
  -2  -4  -2   92.73    3.25
  -2   4   2   89.38    3.23
  -2  -4  -2   92.47    3.15
   2  -4  -2   97.12    3.24
  -2  -4   2   95.11    3.32
   2   4   2   90.05    3.25
   2   4   2   99.06    3.26
   2  -4  -2   92.42    3.23
  -2  -4   2   93.51    3.24
   4   4  -2    4.83    0.51
  -4  -4  -2    4.03    0.45
   4  -4   2    3.90    0.35
  -4   4   2    3.58    0.42
   4  -4   2    4.29    0.39
   4  -4  -2    5.25    0.48
  -4  -4   2    4.25    0.61
  -4  -4   2    5.68    0.54
   4  -4  -2    3.94    0.44
   4   4   2    4.59    0.48
  -4   4  -2    3.93    0.37
   4   4   2    4.81    0.49
  -6   4   2   40.10    1.67
  -6  -4  -2   40.60    1.73
   6   4  -2   40.78    1.80
  -6  -4  -2   39.72    1.86
   6  -4   2   38.47    1.63
   6  -4   2   40.08    1.67
  -6  -4   2   41.33    1.91
   6   4   2   41.18    1.76
   6  -4  -2   41.14    1.71
  -6   4  -2   38.26    1.62
  -6   4  -2   40.93    1.97
   6  -4  -2   42.28    1.69
  -8  -4  -2   36.64    1.91
  -8   4   2   35.08    1.67
   8   4  -2   34.67    1.83
  -8  -4  -2   35.61    1.72
   8  -4   2   36.66    1.67
   8  -4   2   35.99    1.70
  -8   4  -2   34.28    1.61
  -8   4  -2   31.90    1.98
   8  -4  -2   37.65    1.68
   8   4   2   35.38    1.79
  -8  -4   2   35.11    1.95
   8  -4  -2   36.12    1.73
  10  -4   2   74.04    3.09
 -10  -4  -2   76.44    3.15
 -10  -4  -2   78.40    3.51
  10  -4   2   78.32    3.09
  10   4  -2   73.80    3.23
  10   4  -2   78.48    3.47
 -10   4   2   76.55    3.08
  10   4   2   78.94    3.25
 -10   4  -2   74.42    3.62
 -10   4  -2   76.19    3.00
  10  -4  -2   75.95    3.15
 -10  -4   2   84.23    3.33
 -12  -4  -2   35.31    2.27
  12  -4   2   32.85    1.95
  12  -4   2   34.80    2.03
 -12  -4  -2   33.02    2.15
  12   4  -2   32.22    2.23
 -12   4   2   33.86    1.99
  12  -4  -2   32.58    2.12
  12   4   2   38.57    2.20
 -12   4  -2   35.43    2.37
 -12  -4   2   36.91    2.27
 -12   4  -2   37.50    1.90
 -14  -4  -2   34.33    2.24
 -14   4   2   29.19    2.11
  14   4  -2   33.97    2.49
  14  -4   2   31.61    2.24
  14   4   2   32.31    2.35
 -14   4  -2   30.42    2.60
  14  -4  -2   30.26    2.29
 -14  -4   2   33.66    2.38
  16   4  -2    6.88    1.59
 -16  -4  -2    5.24    1.35
  16  -4   2    5.20    1.37
  16   4   2    6.60    1.57
 -16  -4   2    6.40    1.37
  16  -4  -2    4.69    1.49
  18   4  -2    8.48    1.76
  18  -4   2    5.56    1.69
  18  -4  -2    6.18    1.70
  18   4   2    6.07    1.66
  -1  -5  -2   60.95    2.01
  -1   5   2   55.68    2.05
  -1  -5  -2   57.55    2.06
   1   5  -2   55.66    2.00
   1   5  -2   51.93    2.06
  -1  -5  -2   57.37    2.07
  -1  -5   2   55.88    2.03
   1   5   2   54.94    2.07
   1   5   2   57.22    2.00
  -1  -5   2   53.75    2.10
   1  -5  -2   57.84    2.05
   1  -5  -2   58.58    2.06
  -1   5  -2   56.20    1.99
   1   5   2   63.70    2.08
  -1  -5   2   57.34    2.02
  -3   5   2  108.97    3.78
  -3  -5  -2  108.06    3.71
  -3  -5  -2  114.59    3.83
  -3  -5  -2  110.57    3.82
   3   5  -2  108.95    3.81
   3  -5  -2  109.45    3.79
   3  -5  -2  111.87    3.80
  -3  -5   2  107.50    3.91
  -3  -5   2  110.75    3.84
   3   5   2  104.49    3.82
   5   5  -2   79.53    2.89
   5  -5   2   73.80    2.72
   5  -5   2   73.10    2.75
  -5  -5  -2   78.27    2.85
  -5  -5  -2   79.01    3.13
  -5   5   2   76.14    2.78
   5  -5  -2   82.89    2.82
   5   5   2   79.30    2.88
  -5  -5   2   76.82    3.00
  -5   5  -2   74.47    3.26
   5  -5  -2   77.29    2.81
  -7   5   2  110.91    4.05
   7  -5   2  110.49    4.04
   7   5  -2  109.79    4.17
  -7  -5  -2  113.84    4.12
   7  -5   2  110.17    4.03
  -7  -5  -2  114.47    4.60
   7  -5  -2  116.28    4.07
  -7   5  -2  111.03    4.71
  -7   5  -2  110.19    3.96
  -7  -5   2  119.77    4.29
   7  -5  -2  117.59    4.73
   7  -5  -2  115.45    4.09
   7   5   2  112.06    4.15
  -9  -5  -2    3.00    0.74
   9   5  -2    1.49    0.72
   9  -5   2    1.78    0.64
   9  -5   2    2.25    0.62
  -9   5   2    2.73    0.64
   9   5  -2    1.83    0.68
  -9  -5  -2    1.37    0.72
   9  -5  -2    2.67    0.65
   9   5   2    1.70    0.78
   9  -5  -2    1.87    0.67
  -9   5  -2    1.35    0.78
  -9   5  -2    1.99    0.56
  -9  -5   2    1.75    0.84
 -11  -5  -2   38.56    2.08
 -11  -5  -2   33.85    2.15
  11  -5   2   36.81    1.90
 -11   5   2   37.24    1.94
  11   5  -2   36.82    2.18
  11  -5   2   35.84    1.95
 -11   5  -2   33.84    2.34
  11   5   2   36.28    2.15
  11  -5  -2   36.79    2.03
 -11  -5   2   39.29    2.28
 -11   5  -2   33.91    1.78
 -13  -5  -2   97.54    3.98
 -13   5   2   93.54    3.82
  13  -5   2   92.90    3.88
  13   5  -2   98.99    4.09
 -13   5  -2   88.47    3.66
 -13  -5   2   96.12    4.07
 -13   5  -2   90.51    4.49
  13  -5  -2   94.47    3.96
  13   5   2   92.32    3.99
  15  -5   2   11.60    1.43
  15   5  -2   14.23    1.70
 -15  -5  -2   11.43    1.48
  15  -5  -2   10.02    1.46
 -15  -5   2   12.08    1.50
  15   5   2   14.30    1.61
  17   5  -2   11.27    1.81
  17  -5   2    8.32    1.52
 -17  -5   2    7.15    1.53
  17   5   2    9.13    1.64
  17  -5  -2    7.02    1.71
  19  -5   2    3.25    1.65
  19   5  -2    3.69    1.77
  19   5   2    1.39    1.73
  19  -5  -2    1.78    1.70
   0  -6   2   51.40    1.95
   0   6  -2   53.68    1.93
   0  -6  -2   59.10    1.99
   0  -6  -2   55.15    1.98
   0  -6   2   55.51    1.94
   0   6   2   55.56    1.98
   0   6  -2   49.30    1.87
   0  -6   2   54.52    1.89
   0   6   2   55.32    1.94
  -2  -6  -2   27.20    1.14
  -2   6   2   26.64    1.08
   2   6  -2   24.68    1.07
  -2  -6  -2   26.33    1.08
  -2  -6   2   25.49    1.12
   2   6   2   24.60    1.14
   2   6   2   27.05    1.09
   2  -6  -2   25.80    1.08
   2  -6  -2   27.85    1.10
  -2  -6   2   25.35    1.10
  -2  -6   2   25.57    1.26
  -4   6   2  128.56    4.58
   4   6  -2  133.82    4.65
  -4  -6  -2  131.46    4.52
  -4  -6  -2  130.83    4.64
  -4  -6   2  136.67    4.68
   4  -6  -2  139.18    4.61
   4  -6  -2  132.26    4.60
  -4  -6   2  134.15    4.76
   4   6   2  131.80    4.66
  -6   6   2  228.30    7.76
   6  -6   2  219.21    7.74
   6   6  -2  226.75    7.87
   6  -6   2  216.34    7.72
  -6  -6  -2  238.30    8.81
  -6  -6  -2  226.53    7.83
   6  -6  -2  227.10    8.96
  -6  -6   2  232.78    7.97
   6  -6  -2  237.35    7.79
   6  -6  -2  227.47    7.79
   6   6   2  225.50    7.86
   8  -6   2    9.10    0.80
  -8  -6  -2   10.44    0.93
   8  -6   2    9.10    0.78
  -8   6   2    9.10    0.77
   8   6  -2    8.59    0.92
  -8  -6  -2    8.57    0.90
  -8   6  -2    8.77    0.66
   8  -6  -2    9.23    0.79
  -8   6  -2    9.32    1.10
   8  -6  -2    8.17    0.81
  -8  -6   2    8.38    1.01
   8   6   2    8.43    0.88
   8  -6  -2   10.55    1.06
  10   6  -2   21.99    1.70
  10   6  -2   20.67    1.55
 -10   6   2   18.84    1.39
  10  -6   2   21.88    1.39
 -10  -6  -2   22.38    1.63
 -10  -6  -2   21.03    1.60
  10  -6   2   21.24    1.46
  10   6   2   21.21    1.71
 -10  -6   2   24.76    1.82
  10  -6  -2   19.42    1.58
 -10   6  -2   20.24    1.86
  10  -6  -2   21.92    1.45
 -10   6  -2   21.65    1.25
  12  -6   2   32.15    1.95
 -12  -6  -2   33.70    2.19
  12  -6   2   36.73    2.10
 -12   6   2   33.70    1.95
  12   6  -2   35.35    2.31
 -12  -6   2   39.11    2.36
  12  -6  -2   31.29    2.15
  12   6   2   34.12    2.25
 -12   6  -2   35.25    2.43
 -12   6  -2   32.42    1.77
  14   6  -2   35.04    2.55
 -14  -6  -2   37.10    2.38
  14  -6   2   34.30    2.30
 -14   6   2   34.32    2.28
 -14  -6   2   37.39    2.52
  14   6   2   33.97    2.49
 -14   6  -2   31.75    2.69
  14  -6  -2   32.72    2.45
 -16  -6  -2   11.26    1.64
  16  -6   2   10.51    1.50
  16   6  -2   12.75    1.86
  16   6   2   10.91    1.62
  16  -6  -2   10.60    1.60
 -16  -6   2   11.57    1.61
  18   6  -2    0.32    1.49
  18  -6   2    2.08    1.54
  18  -6  -2    0.82    1.63
 -18  -6   2    2.75    1.44
  18   6   2    2.48    1.69
   1   7  -2    0.73    0.24
  -1  -7  -2    0.91    0.33
   1   7  -2    1.01    0.34
  -1  -7  -2    0.87    0.33
  -1  -7  -2    1.83    0.36
  -1   7   2    0.42    0.30
   1   7   2    0.93    0.33
  -1  -7   2    0.94    0.41
  -1  -7   2    0.90    0.33
  -1   7  -2    0.42    0.30
  -1  -7   2    1.00    0.30
   1  -7  -2    0.81    0.30
   1  -7  -2    0.57    0.28
   1   7   2    0.43    0.31
  -3  -7  -2   18.23    0.95
  -3   7   2   18.00    0.83
  -3  -7  -2   15.96    0.92
  -3  -7  -2   16.38    0.86
   3   7  -2   17.20    0.92
   3   7   2   15.21    0.95
  -3  -7   2   16.23    1.15
  -3  -7   2   18.66    1.00
   3  -7  -2   16.83    0.87
   3  -7  -2   16.54    0.86
  -5   7   2  150.54    5.25
   5   7  -2  152.82    5.37
  -5  -7  -2  151.27    5.21
  -5  -7  -2  153.13    5.34
  -5  -7  -2  153.15    5.93
   5  -7   2  139.61    5.18
   5  -7  -2  148.50    6.12
   5   7   2  158.95    5.39
  -5  -7   2  166.13    5.46
  -5  -7   2  158.65    5.49
  -5   7  -2  144.55    6.09
   5  -7  -2  149.50    5.28
   5  -7  -2  163.29    5.30
  -7  -7  -2   60.88    2.63
   7  -7   2   60.78    2.31
  -7  -7  -2   59.23    2.45
   7  -7   2   58.88    2.32
   7   7  -2   59.35    2.51
  -7   7   2   59.64    2.30
  -7   7  -2   56.06    2.80
  -7  -7   2   63.41    2.66
   7   7   2   60.04    2.50
   7  -7  -2   60.62    2.37
   7  -7  -2   59.70    2.33
   7  -7  -2   58.58    2.83
   9   7  -2    3.77    0.88
  -9   7   2    3.10    0.60
   9   7  -2    3.84    0.71
  -9  -7  -2    4.02    0.77
  -9  -7  -2    4.55    0.85
   9  -7   2    3.67    0.66
   9  -7   2    3.18    0.69
   9  -7  -2    4.40    0.69
  -9   7  -2    2.46    0.87
  -9  -7   2    3.40    0.92
   9  -7  -2    4.16    0.79
   9   7   2    5.51    0.99
  -9   7  -2    4.04    0.52
 -11  -7  -2   55.48    2.64
  11  -7   2   57.95    2.52
  11  -7   2   55.17    2.40
  11   7  -2   56.58    2.70
  11   7  -2   57.70    2.72
 -11   7   2   53.48    2.37
 -11  -7   2   54.42    2.79
  11  -7  -2   49.32    2.54
 -11   7  -2   51.51    2.21
 -11   7  -2   51.85    2.98
  11   7   2   51.68    2.67
  11  -7  -2   51.07    2.45
 -13   7   2  119.92    4.79
  13  -7   2  122.74    4.86
 -13  -7  -2  123.74    5.03
  13   7  -2  130.78    5.11
 -13  -7   2  139.28    5.18
  13  -7  -2  124.72    5.01
 -13   7  -2  121.67    5.70
  13   7   2  128.66    5.07
 -15  -7  -2    4.53    1.32
  15   7  -2    5.89    1.51
  15  -7   2    7.46    1.29
  15  -7  -2    4.50    1.37
 -15  -7   2    5.71    1.36
  15   7   2    5.76    1.40
 -17  -7  -2    2.79    1.44
  17  -7   2    2.06    1.39
  17   7  -2    3.24    1.50
  17   7   2    1.77    1.48
 -17  -7   2    1.66    1.33
  17  -7  -2    0.09    1.47
  19  -7   2   10.14    1.82
  19   7  -2    6.72    1.85
  19  -7  -2    4.18    1.87
  19   7   2    6.16    1.82
   0  -8   2    1.31    0.35
   0   8  -2    0.94    0.34
   0  -8  -2    1.53    0.37
   0   8   2    1.41    0.33
   0  -8   2    1.05    0.28
   0  -8   2    1.12    0.32
   0   8   2    1.60    0.39
  -2   8   2   68.02    2.51
  -2  -8  -2   70.10    2.57
   2   8  -2   70.08    2.51
  -2  -8  -2   77.15    2.60
  -2  -8  -2   74.49    2.53
  -2   8  -2   70.69    2.49
   2  -8  -2   74.24    2.54
  -2  -8   2   67.87    2.64
   2   8   2   69.05    2.52
   2   8   2   66.69    2.57
   2  -8  -2   67.61    2.52
  -2  -8   2   70.62    2.59
  -4  -8  -2  217.61    7.44
  -4   8   2  210.55    7.35
   4   8  -2  217.93    7.44
  -4  -8  -2  214.26    7.28
   4   8   2  212.32    7.45
  -4  -8   2  233.92    7.52
  -4  -8   2  220.75    7.55
   4  -8  -2  206.02    7.37
   4  -8  -2  221.94    7.38
  -6  -8  -2  378.14   13.88
  -6   8   2  355.04   12.22
   6  -8   2  352.10   12.19
  -6  -8  -2  366.51   12.34
   6   8  -2  364.71   12.37
   6  -8   2  342.94   12.19
  -6  -8   2  387.51   12.48
   6  -8  -2  379.82   12.27
  -6   8  -2  349.26   14.05
   6  -8  -2  365.79   12.26
   6   8   2  364.10   12.37
   6  -8  -2  354.68   14.08
  -8  -8  -2    3.85    0.68
   8  -8   2    3.10    0.62
  -8   8   2    2.84    0.54
   8   8  -2    1.81    0.71
  -8  -8  -2    2.58    0.69
   8  -8   2    3.04    0.59
   8  -8  -2    2.47    0.80
  -8  -8   2    3.17    0.85
   8   8   2    2.76    0.72
  -8   8  -2    1.30    0.76
   8  -8  -2    3.03    0.65
   8  -8  -2    2.89    0.60
  10   8  -2   76.80    3.34
 -10   8   2   75.46    2.99
  10   8  -2   80.58    3.45
  10  -8   2   75.87    3.10
 -10  -8  -2   78.97    3.27
  10  -8   2   78.92    3.04
 -10  -8   2   83.34    3.45
 -10   8  -2   75.57    2.85
  10  -8  -2   78.09    3.18
 -10   8  -2   73.07    3.72
  10   8   2   76.52    3.33
  10  -8  -2   78.93    3.09
 -12   8   2   49.80    2.37
  12  -8   2   50.13    2.53
  12   8  -2   51.08    2.82
 -12  -8  -2   51.34    2.73
  12  -8   2   51.53    2.44
 -12  -8   2   57.48    2.89
  12   8   2   56.19    2.81
 -12   8  -2   52.04    3.12
  12  -8  -2   54.52    2.66
 -14  -8  -2   15.46    1.59
  14   8  -2   16.48    1.72
  14  -8   2   12.89    1.42
 -14   8  -2   15.34    1.90
 -14  -8   2   15.27    1.73
  14  -8  -2   16.53    1.66
  14   8   2   16.99    1.79
  16   8  -2   -1.75    1.30
 -16  -8  -2    0.58    1.32
  16  -8   2    0.73    1.27
  16  -8  -2    0.04    1.39
  16   8   2    0.91    1.36
 -16  -8   2    0.93    1.27
  18   8  -2    0.46    1.60
  18  -8   2    2.60    1.55
  18   8   2    1.74    1.64
 -18  -8   2    3.19    1.48
  18  -8  -2    2.09    1.77
  -1   9   2    0.00    0.31
   1   9  -2    0.50    0.25
  -1  -9  -2    0.42    0.35
  -1  -9  -2   -0.21    0.36
   1   9  -2    0.38    0.38
   1   9   2    0.09    0.35
  -1  -9   2    0.24    0.41
  -1   9  -2    0.32    0.34
   1  -9  -2    0.49    0.33
  -1  -9   2    0.56    0.37
   1  -9  -2    0.55    0.31
   1   9   2   -0.01    0.37
  -1  -9   2   -0.11    0.26
   3   9  -2   18.84    1.02
  -3  -9  -2   18.66    1.06
  -3   9   2   18.16    0.94
  -3  -9  -2   20.97    1.07
  -3  -9  -2   20.25    1.01
   3   9   2   19.22    1.09
   3   9   2   21.43    1.04
  -3  -9   2   20.42    1.04
   3  -9  -2   18.61    0.96
   3  -9  -2   20.74    0.99
  -3  -9   2   19.04    1.24
  -3  -9   2   20.64    1.16
  -5   9   2  250.22    8.73
  -5  -9  -2  256.45    8.66
   5   9  -2  257.59    8.86
  -5  -9  -2  256.93    8.85
   5   9   2  259.80    8.89
   5  -9  -2  250.71    8.76
   5  -9  -2  268.61    8.78
  -5  -9   2  273.74    8.99
  -5  -9   2  275.10    8.96
  -5   9  -2  234.56   10.06
   5  -9  -2  259.67   10.12
  -7   9   2   39.98    1.63
  -7  -9  -2   42.10    1.88
   7   9  -2   37.72    1.93
   7  -9   2   39.29    1.64
   7  -9   2   36.76    1.65
  -7  -9  -2   41.94    1.88
   7  -9  -2   39.38    1.73
   7   9   2   37.99    1.92
  -7   9  -2   35.90    2.15
   7  -9  -2   37.05    2.20
   7  -9  -2   41.13    1.72
  -7  -9   2   41.17    2.10
   9  -9   2    7.50    0.82
   9  -9   2    7.39    0.78
   9   9  -2    8.80    0.91
   9   9  -2    5.64    0.95
  -9   9   2    6.45    0.70
  -9  -9  -2    6.25    0.89
   9  -9  -2    7.16    0.78
  -9   9  -2    7.88    1.22
  -9  -9   2    7.77    1.15
   9   9   2    6.49    1.04
   9  -9  -2    5.66    0.84
  11  -9   2   51.70    2.29
  11   9  -2   54.04    2.72
 -11  -9  -2   49.22    2.60
  11   9  -2   51.19    2.57
  11  -9   2   48.56    2.38
 -11   9   2   49.00    2.23
  11   9   2   53.44    2.71
  11  -9  -2   53.13    2.38
  11  -9  -2   51.02    2.51
 -11  -9   2   52.43    2.79
 -11   9  -2   50.20    2.99
  13   9  -2   77.27    3.70
  13  -9   2   79.83    3.44
 -13  -9  -2   75.76    3.64
 -13  -9   2   85.50    3.80
  13   9   2   83.84    3.74
  13  -9  -2   77.55    3.56
 -13   9  -2   76.65    4.14
 -15  -9  -2    3.46    1.24
  15  -9   2    2.30    1.22
  15   9  -2    3.37    1.30
 -15  -9   2    2.07    1.34
  15   9   2    3.44    1.30
  15  -9  -2    3.29    1.35
 -17  -9  -2    7.67    1.70
  17  -9   2    5.35    1.53
  17   9  -2    5.57    1.69
  17  -9  -2    5.70    1.77
  17   9   2    4.35    1.65
 -17  -9   2    3.33    1.57
  19   9  -2    2.96    1.81
  19  -9   2    5.44    1.80
  19   9   2    4.12    1.86
  19  -9  -2    4.99    1.94
   0 -10   2   30.31    1.32
   0 -10   2   30.72    1.29
   0  10  -2   31.34    1.36
   0  10   2   31.35    1.34
   0 -10  -2   33.00    1.36
   0 -10  -2   35.07    1.38
   0  10   2   32.22    1.37
  -2 -10  -2   19.24    1.02
  -2  10   2   17.54    0.91
  -2 -10  -2   17.41    0.97
   2  10  -2   17.26    0.88
  -2 -10  -2   16.95    0.99
  -2 -10   2   16.58    1.07
  -2 -10   2   18.36    0.98
   2 -10  -2   17.26    0.92
  -2  10  -2   17.70    0.94
  -2 -10   2   17.55    1.12
   2 -10  -2   18.28    0.93
   2  10   2   16.56    1.01
   2  10   2   18.34    1.02
  -4  10   2   15.89    0.89
  -4 -10  -2   18.75    1.10
   4  10  -2   15.49    1.04
  -4 -10  -2   17.17    0.98
   4 -10  -2   14.78    0.94
   4 -10  -2   16.57    0.92
  -4  10  -2   14.95    1.20
  -4 -10   2   16.12    1.26
   4  10   2   15.81    1.12
   4 -10  -2   16.91    1.26
  -4 -10   2   14.26    1.13
  -4 -10   2   15.92    1.02
  -6  10   2  100.91    3.63
  -6 -10  -2  103.93    3.69
  -6 -10  -2  105.19    4.09
   6  10  -2  103.71    3.85
  -6 -10  -2  105.73    3.83
  -6  10  -2   96.79    4.38
   6 -10  -2  100.22    4.41
   6  10   2  102.59    3.87
  -6 -10   2  106.24    4.00
   6 -10  -2  104.59    3.70
   6 -10  -2  101.01    3.70
   8 -10   2    4.48    0.65
   8  10  -2    6.48    0.96
  -8  10   2    5.24    0.61
  -8 -10  -2    6.38    0.90
   8 -10   2    5.07    0.64
   8 -10  -2    6.40    0.71
  -8 -10   2    5.87    0.96
   8  10   2    5.69    0.93
  -8  10  -2    5.91    1.06
   8 -10  -2    5.88    0.74
  10  10  -2    1.32    0.70
 -10  10   2    1.84    0.59
  10 -10   2    1.87    0.73
  10 -10   2    2.11    0.70
 -10 -10  -2    2.72    0.92
  10  10  -2    1.05    0.88
 -10  10  -2    2.83    1.06
 -10 -10   2    2.35    1.06
  10 -10  -2    2.02    0.72
  10  10   2    0.77    0.88
  10 -10  -2    1.23    0.80
  12 -10   2   40.15    2.25
  12 -10   2   39.99    2.11
  12  10  -2   43.75    2.59
 -12 -10  -2   42.28    2.52
 -12  10   2   38.82    2.02
 -12 -10   2   45.48    2.69
 -12  10  -2   41.54    2.88
  12  10   2   44.59    2.63
  12 -10  -2   41.16    2.38
  14 -10   2   44.54    2.54
 -14 -10  -2   49.81    2.88
  14  10  -2   42.40    2.85
  14  10   2   44.05    2.91
 -14  10  -2   39.94    3.13
  14 -10  -2   39.48    2.71
 -14 -10   2   45.40    2.91
  16 -10   2    1.66    1.30
 -16 -10  -2    3.01    1.49
  16  10  -2    3.11    1.45
  16  10   2    2.54    1.40
 -16 -10   2    4.56    1.50
  16 -10  -2    1.73    1.52
  18 -10   2    0.87    1.59
  18  10  -2    0.30    1.62
  18 -10  -2   -1.11    1.66
 -18 -10   2    1.08    1.45
  18  10   2    0.64    1.58
  -1 -11  -2    3.55    0.49
  -1  11   2    3.32    0.43
  -1  11   2    3.54    0.51
   1  11  -2    2.68    0.34
  -1 -11  -2    4.12    0.51
   1  11  -2    4.09    0.56
   1 -11  -2    3.25    0.52
   1  11   2    2.54    0.51
   1  11   2    2.84    0.47
  -1 -11   2    2.28    0.49
   1 -11  -2    3.86    0.49
  -1  11  -2    2.82    0.47
  -1 -11   2    2.13    0.51
  -1 -11   2    2.97    0.48
   1 -11  -2    2.96    0.46
  -3 -11  -2   64.70    2.44
  -3 -11  -2   61.43    2.41
  -3 -11  -2   61.26    2.36
  -3  11   2   60.78    2.29
   3  11  -2   64.36    2.37
   3  11   2   63.54    2.45
  -3 -11   2   66.27    2.39
  -3 -11   2   60.04    2.50
   3 -11  -2   61.09    2.33
  -3 -11   2   61.25    2.50
   3 -11  -2   65.64    2.34
   3  11   2   63.16    2.38
  -5 -11  -2   70.38    2.67
  -5 -11  -2   72.30    2.80
  -5  11   2   72.72    2.62
   5  11  -2   71.61    2.79
   5 -11  -2   73.02    3.26
  -5  11  -2   65.22    3.18
  -5 -11   2   74.96    2.97
  -5 -11   2   69.84    2.70
   5 -11  -2   73.18    2.66
  -5 -11   2   76.58    2.92
   5 -11  -2   68.48    2.66
   5  11   2   73.70    2.84
  -7  11   2   27.77    1.32
   7  11  -2   28.46    1.72
  -7 -11  -2   29.48    1.49
  -7 -11  -2   29.86    1.67
   7 -11  -2   29.84    1.93
   7  11   2   31.63    1.75
  -7  11  -2   26.43    1.95
  -7 -11   2   34.28    1.96
   7 -11  -2   28.58    1.50
   7 -11  -2   28.97    1.45
  -9  11   2   17.08    1.16
   9 -11   2   18.67    1.33
   9  11  -2   20.83    1.37
  -9 -11  -2   19.79    1.63
   9 -11   2   19.32    1.25
   9  11  -2   18.10    1.40
   9  11   2   16.56    1.38
  -9  11  -2   20.59    1.70
   9 -11  -2   18.00    1.39
   9 -11  -2   19.51    1.30
  -9 -11   2   23.05    1.90
  11 -11   2    2.92    0.86
 -11 -11  -2    5.10    1.16
  11  11  -2    3.65    1.11
 -11  11   2    2.81    0.68
  11  11  -2    5.36    0.88
  11 -11   2    3.52    0.80
 -11  11  -2    2.91    1.23
 -11 -11   2    4.40    1.21
  11 -11  -2    3.11    0.96
  11  11   2    3.58    1.21
 -13 -11  -2   40.14    2.64
  13  11  -2   45.27    2.70
  13 -11   2   38.94    2.31
  13 -11  -2   36.54    2.43
 -13 -11   2   38.35    2.74
 -13  11  -2   35.30    2.97
  13  11   2   38.05    2.67
  15 -11   2   17.79    1.68
 -15 -11  -2   16.45    1.94
  15  11  -2   19.61    2.04
  15  11   2   17.26    1.75
  15 -11  -2   15.42    1.75
 -15 -11   2   18.41    1.94
  17  11  -2    3.88    1.59
 -17 -11  -2    2.01    1.41
  17 -11   2    1.17    1.47
  17 -11  -2    4.14    1.68
  17  11   2    1.04    1.55
 -17 -11   2    5.29    1.68
   0 -12  -2   36.03    1.51
   0  12  -2   35.45    1.53
   0  12   2   36.66    1.54
   0  12   2   33.38    1.48
   0 -12   2   33.60    1.48
   0 -12  -2   35.52    1.49
   0 -12   2   33.09    1.41
   0 -12   2   36.56    1.51
   0 -12  -2   33.58    1.60
  -2  12   2   22.91    1.14
  -2 -12  -2   25.51    1.27
  -2 -12  -2   24.99    1.24
  -2 -12  -2   27.62    1.27
   2  12  -2   25.68    1.28
   2  12  -2   24.77    1.13
   2  12   2   24.77    1.30
   2 -12  -2   24.92    1.43
  -2 -12   2   22.40    1.34
  -2  12  -2   23.12    1.20
   2 -12  -2   25.47    1.19
  -2 -12   2   25.96    1.26
   2 -12  -2   25.59    1.19
   2  12   2   24.89    1.28
  -2 -12   2   26.55    1.35
  -4  12   2   28.17    1.26
   4  12  -2   28.98    1.43
  -4 -12  -2   27.76    1.48
  -4 -12  -2   28.24    1.39
  -4 -12   2   30.96    1.43
   4 -12  -2   28.48    1.33
  -4 -12   2   30.57    1.61
   4 -12  -2   29.90    1.74
  -4 -12   2   30.72    1.64
   4  12   2   30.71    1.53
  -4  12  -2   27.78    1.64
   4 -12  -2   31.08    1.34
  -6 -12  -2   98.98    3.63
  -6 -12  -2   98.55    3.76
   6  12  -2   99.99    3.79
  -6  12   2  100.22    3.54
  -6  12  -2   94.18    4.32
   6  12   2  103.35    3.83
   6 -12  -2   95.14    4.31
   6 -12  -2  103.23    3.62
  -6 -12   2  106.42    3.95
   6 -12  -2   96.77    3.61
   8 -12   2   48.33    2.15
  -8  12   2   55.43    2.16
  -8 -12  -2   58.47    2.53
   8  12  -2   59.62    2.60
   8  12  -2   59.03    2.47
   8 -12   2   52.67    2.19
   8 -12  -2   55.07    2.34
   8  12   2   55.59    2.61
  -8  12  -2   48.39    2.90
   8 -12  -2   56.05    2.30
  -8 -12   2   60.16    2.78
 -10 -12  -2   45.27    2.38
  10  12  -2   44.15    2.45
 -10  12   2   41.62    1.88
  10 -12   2   42.84    1.98
  10 -12   2   41.30    2.04
  10  12  -2   44.90    2.22
  10 -12  -2   40.79    2.14
  10 -12  -2   41.57    2.05
 -10 -12   2   41.91    2.55
  10  12   2   44.53    2.52
 -10  12  -2   42.29    2.75
  12 -12   2   52.56    2.68
  12  12  -2   60.76    2.89
 -12 -12  -2   59.03    3.06
  12  12  -2   63.18    3.10
  12  12   2   60.36    3.15
 -12  12  -2   54.88    3.44
  12 -12  -2   56.19    2.82
 -12 -12   2   59.63    3.16
 -14 -12  -2    4.60    1.40
  14  12  -2    4.06    1.34
  14 -12   2    3.21    1.15
  14  12   2    5.10    1.35
 -14 -12   2    3.06    1.31
  14 -12  -2    2.79    1.27
 -16 -12  -2    6.93    1.57
  16  12  -2   10.82    1.86
  16 -12   2    6.81    1.51
 -16 -12   2    4.71    1.54
  16 -12  -2    9.75    1.74
  16  12   2    9.22    1.74
  18  12  -2    0.42    1.51
  18 -12   2    0.54    1.62
 -18 -12  -2    1.92    1.74
  18 -12  -2    0.61    1.74
  18  12   2    1.37    1.65
 -18 -12   2   -0.21    1.60
  -1 -13  -2   19.78    1.14
  -1  13   2   20.72    1.16
  -1  13   2   17.29    1.03
   1  13  -2   20.24    1.19
  -1 -13  -2   18.53    1.14
   1  13  -2   20.20    0.90
   1 -13  -2   18.66    1.06
  -1  13  -2   21.65    1.15
   1 -13  -2   20.92    1.08
   1 -13  -2   18.53    1.22
  -1 -13   2   18.14    1.14
   1  13   2   20.45    1.18
  -1 -13   2   20.95    1.15
   1  13   2   20.21    1.10
  -1 -13   2   20.52    1.12
  -3  13   2    4.59    0.49
  -3 -13  -2    4.90    0.66
  -3 -13  -2    4.53    0.65
   3  13  -2    3.53    0.53
  -3 -13  -2    3.65    0.61
   3 -13  -2    4.01    0.52
   3 -13  -2    4.03    0.70
  -3 -13   2    4.16    0.68
  -3  13  -2    4.22    0.71
  -3  13  -2    4.02    0.55
  -3 -13   2    4.00    0.59
   3 -13  -2    3.43    0.51
  -3 -13   2    5.26    0.73
   3  13   2    3.77    0.62
   3  13   2    4.42    0.65
  -5  13   2    0.32    0.38
   5  13  -2    0.59    0.56
  -5 -13  -2    1.00    0.52
  -5 -13  -2    0.48    0.64
  -5 -13   2    0.86    0.67
   5 -13  -2    1.07    0.49
   5 -13  -2    1.42    0.47
   5  13   2    0.53    0.61
  -5 -13   2    0.73    0.71
  -5 -13   2    0.06    0.51
   5 -13  -2    1.12    0.69
  -5  13  -2    1.16    0.68
  -7  13   2   49.59    1.96
   7  13  -2   49.94    2.34
  -7 -13  -2   50.46    2.31
   7 -13  -2   47.43    2.08
  -7 -13   2   52.95    2.54
   7  13   2   47.51    2.35
   7 -13  -2   51.43    2.08
  -7  13  -2   44.43    2.67
  -9  13   2   43.03    1.87
   9 -13   2   43.11    1.92
   9 -13   2   42.18    1.96
   9  13  -2   47.17    2.16
   9  13  -2   47.08    2.41
  -9 -13  -2   45.79    2.35
  -9 -13   2   49.94    2.60
   9 -13  -2   40.97    2.13
   9 -13  -2   43.08    2.03
  -9  13  -2   40.88    2.74
  11 -13   2   36.08    2.10
  11  13  -2   42.92    2.22
 -11 -13  -2   44.63    2.52
  11  13  -2   44.62    2.58
  11 -13   2   36.60    1.98
 -11 -13   2   44.91    2.69
  11  13   2   40.82    2.66
  11 -13  -2   39.90    2.24
 -11  13  -2   42.70    2.94
  13  13  -2    1.99    1.29
 -13 -13  -2    0.34    1.14
  13 -13   2    1.46    1.04
  13 -13  -2   -0.67    1.13
 -13 -13   2    1.92    1.42
 -13  13  -2    2.21    1.48
  13  13   2    0.80    1.33
  15 -13   2   23.55    1.87
  15  13  -2   23.18    2.09
 -15 -13  -2   23.29    2.16
  15 -13  -2   19.77    1.93
  15  13   2   25.57    2.17
 -15 -13   2   18.88    1.98
 -17 -13  -2    5.48    1.57
  17 -13   2    4.92    1.61
  17  13  -2    8.25    1.78
 -17 -13   2    3.10    1.52
  17  13   2    8.60    1.96
  17 -13  -2    5.18    1.83
   0 -14  -2   37.17    1.69
   0  14  -2   37.01    1.65
   0 -14  -2   33.74    1.57
   0 -14  -2   36.99    1.59
   0 -14   2   35.73    1.53
   0  14   2   32.11    1.54
   0 -14   2   36.00    1.50
   0  14   2   36.75    1.63
   2  14  -2   19.67    1.26
  -2  14   2   17.55    1.20
  -2  14   2   18.56    1.03
  -2 -14  -2   23.45    1.20
  -2 -14  -2   21.34    1.24
   2  14  -2   20.37    1.02
  -2 -14  -2   20.35    1.17
   2  14   2   18.84    1.22
  -2 -14   2   19.10    1.23
  -2  14  -2   17.73    1.31
  -2 -14   2   17.97    1.25
   2  14   2   21.17    1.24
  -2 -14   2   20.56    1.21
   2 -14  -2   21.35    1.11
  -2  14  -2   19.34    1.18
   2 -14  -2   20.28    1.12
   4  14  -2   15.84    1.11
  -4 -14  -2   16.64    1.09
  -4  14   2   13.37    0.89
  -4 -14  -2   14.76    1.23
   4  14   2   15.50    1.26
  -4 -14   2   14.89    1.25
   4 -14  -2   15.22    0.98
  -4 -14   2   17.55    1.13
  -4 -14   2   13.07    1.11
   4 -14  -2   14.44    1.01
  -4  14  -2   14.48    1.22
   4 -14  -2   13.44    1.18
   6  14  -2   90.06    3.58
  -6 -14  -2   94.01    3.60
  -6  14   2   89.66    3.30
   6 -14  -2   91.52    3.40
   6 -14  -2   91.02    4.13
  -6 -14   2   97.18    3.77
   6 -14  -2   96.40    3.42
   6  14   2   96.33    3.66
  -6  14  -2   88.82    4.16
   8  14  -2  109.75    4.45
  -8 -14  -2  116.75    4.43
   8  14  -2  122.93    4.64
  -8  14   2  112.02    4.07
   8 -14  -2  109.07    4.21
   8  14   2  120.32    4.54
   8 -14  -2  113.91    4.19
  -8  14  -2  108.67    5.15
  -8 -14   2  117.22    4.63
  10 -14   2   58.67    2.48
 -10 -14  -2   60.80    2.89
  10 -14   2   57.46    2.42
  10  14  -2   54.43    2.90
  10  14  -2   59.68    2.73
  10 -14  -2   55.64    2.55
  10  14   2   62.08    3.05
 -10 -14   2   61.91    3.10
  10 -14  -2   59.88    2.69
 -10  14  -2   56.62    3.41
  12 -14   2   22.38    1.82
  12  14  -2   23.86    1.76
  12  14  -2   25.41    1.88
 -12 -14  -2   21.24    1.80
 -12 -14   2   20.03    1.88
  12 -14  -2   22.59    1.68
 -12  14  -2   21.45    2.14
  12  14   2   21.06    1.79
  14 -14   2    4.41    1.22
  14  14  -2    3.91    1.41
 -14 -14  -2    2.83    1.33
  14 -14  -2    2.77    1.31
  14  14   2    1.97    1.30
 -14 -14   2    3.12    1.47
  16 -14   2    0.12    1.36
  16  14  -2    1.63    1.60
 -16 -14  -2   -0.34    1.49
  16  14   2   -0.06    1.37
 -16 -14   2    0.70    1.42
  16 -14  -2   -0.59    1.53
  18 -14   2    3.70    1.84
  18 -14  -2    5.01    1.96
  -1  15   2    6.36    0.63
  -1 -15  -2    5.70    0.71
   1 -15   2    5.69    0.52
  -1  15   2    6.88    0.71
   1  15  -2    5.13    0.71
  -1 -15  -2    7.95    0.76
   1  15  -2    6.45    0.48
   1 -15   2    6.46    0.55
  -1  15  -2    5.43    0.70
  -1 -15   2    5.57    0.67
   1 -15  -2    5.26    0.70
   1 -15  -2    6.59    0.67
  -1 -15   2    6.64    0.74
   1 -15  -2    4.83    0.64
  -1 -15   2    6.44    0.69
   1  15   2    5.94    0.68
  -1  15  -2    5.95    0.74
   1  15   2    5.24    0.70
  -3 -15  -2    3.75    0.71
  -3  15   2    3.29    0.49
  -3 -15  -2    2.66    0.59
  -3 -15  -2    3.20    0.67
   3  15  -2    3.30    0.54
  -3  15  -2    2.26    0.57
   3 -15  -2    3.62    0.58
   3 -15  -2    3.97    0.58
  -3 -15   2    2.60    0.69
   3  15   2    3.36    0.72
   3 -15  -2    3.62    0.74
  -3  15  -2    3.11    0.77
  -3 -15   2    2.69    0.71
   3  15   2    3.71    0.71
  -5 -15  -2   -0.33    0.62
   5  15  -2   -0.33    0.60
  -5  15   2    0.45    0.42
  -5  15  -2    0.46    0.79
   5 -15  -2    0.04    0.73
   5 -15  -2    0.60    0.52
  -5 -15   2    1.58    0.78
  -5 -15   2    0.46    0.72
   5 -15  -2    0.84    0.53
   5  15   2    0.28    0.72
  -7 -15  -2   26.01    1.73
  -7  15   2   21.70    1.22
   7  15  -2   24.90    1.75
   7  15   2   28.95    1.85
   7 -15  -2   26.22    1.48
   7 -15  -2   24.63    1.45
  -7  15  -2   23.33    2.15
  -7 -15   2   27.11    2.03
   9 -15   2    1.48    0.61
   9  15  -2   -0.24    0.94
  -9 -15  -2    0.93    0.91
   9  15  -2    2.60    0.65
   9  15   2    2.97    1.12
   9 -15  -2   -0.01    0.67
  -9 -15   2    0.30    1.04
  -9  15  -2    0.63    1.18
   9 -15  -2    0.74    0.78
 -11 -15  -2   50.58    2.83
  11 -15   2   51.15    2.40
  11  15  -2   48.86    2.84
  11 -15   2   43.88    2.24
  11  15  -2   52.55    2.51
 -11 -15   2   51.60    3.00
  11  15   2   51.53    2.97
  11 -15  -2   48.52    2.55
 -11  15  -2   49.18    3.30
  13  15  -2    3.02    1.28
 -13 -15  -2    3.59    1.35
  13 -15   2    2.76    1.14
  13  15   2    4.53    1.33
 -13  15  -2    4.06    1.67
 -13 -15   2    6.56    1.59
  13 -15  -2    1.97    1.23
 -15 -15  -2    5.78    1.75
  15 -15   2    8.21    1.52
  15  15  -2    9.35    1.71
  15 -15  -2    6.67    1.64
  15  15   2    8.43    1.64
 -15 -15   2    8.13    1.61
 -17 -15  -2   -2.23    1.56
  17  15  -2   -0.48    1.57
  17 -15   2   -0.91    1.57
  17 -15  -2   -1.19    1.77
  17  15   2   -2.01    1.63
 -17 -15   2    0.79    1.70
   0 -16  -2    7.80    0.67
   0  16   2    7.91    0.80
   0 -16  -2    9.20    0.80
   0 -16   2    8.09    0.70
   0 -16  -2    6.79    0.73
   0 -16   2    7.73    0.68
   0  16   2    7.18    0.73
   0  16  -2    7.10    0.79
   2  16  -2    0.65    0.64
  -2 -16  -2    1.48    0.60
   2  16  -2    1.71    0.43
  -2  16   2    1.41    0.47
  -2  16   2    2.33    0.66
  -2 -16  -2    1.86    0.61
  -2 -16   2    2.02    0.67
  -2  16  -2    1.46    0.59
  -2 -16   2    2.41    0.67
  -2  16  -2    1.15    0.70
   2 -16  -2    0.09    0.34
   2  16   2    1.79    0.63
   2 -16  -2    1.01    0.53
   2  16   2    1.70    0.61
   4  16  -2    0.57    0.56
  -4 -16  -2    1.03    0.64
  -4  16   2   -0.09    0.42
  -4  16  -2   -0.20    0.58
   4 -16  -2    0.55    0.54
  -4  16  -2    0.29    0.78
   4 -16  -2    0.36    0.69
  -4 -16   2    0.37    0.74
   4 -16  -2   -0.27    0.49
   4  16   2    0.90    0.64
  -4 -16   2   -0.73    0.66
   4  16   2    0.27    0.66
   6  16  -2   69.83    2.97
  -6  16   2   65.19    2.62
  -6 -16  -2   69.69    2.99
   6  16   2   75.78    3.09
  -6 -16   2   75.69    3.16
  -6  16  -2   70.05    3.51
   6 -16  -2   75.10    3.52
   6 -16  -2   67.98    2.75
   6 -16  -2   75.70    2.76
  -8 -16  -2   30.98    2.00
   8  16  -2   27.49    2.02
  -8  16  -2   31.69    2.55
   8 -16  -2   29.25    1.73
   8 -16  -2   27.97    1.66
   8  16   2   37.91    2.24
  -8 -16   2   31.51    2.29
 -10 -16  -2   35.41    2.34
  10  16  -2   35.96    1.83
  10  16  -2   31.99    2.32
  10  16   2   33.63    2.51
 -10 -16   2   32.88    2.50
  10 -16  -2   29.50    1.97
 -10  16  -2   27.49    2.36
  12 -16   2   54.23    2.62
  12  16  -2   59.10    3.12
 -12 -16  -2   56.37    3.14
 -12  16  -2   53.23    3.64
  12 -16  -2   50.14    2.82
 -12 -16   2   53.25    3.19
 -14 -16  -2   11.57    1.77
  14  16  -2    9.44    1.54
  14 -16   2   10.37    1.46
  14  16   2    7.44    1.64
 -14 -16   2    7.80    1.55
  14 -16  -2    9.31    1.61
 -16 -16  -2    2.15    1.67
  16 -16   2    1.70    1.53
  16  16  -2    1.76    1.46
 -16 -16   2    1.91    1.67
  16 -16  -2   -0.77    1.64
  16  16   2    4.31    1.58
  -1  17   2   22.61    1.45
   1 -17   2   23.14    1.16
   1 -17   2   23.32    1.19
   1  17  -2   23.60    1.50
  -1 -17  -2   23.25    1.41
  -1 -17  -2   24.21    1.38
  -1  17   2   19.56    1.27
  -1 -17   2   22.15    1.34
   1 -17  -2   22.42    1.32
   1 -17  -2   23.64    1.36
  -1 -17   2   25.26    1.36
   1  17   2   21.80    1.44
   1 -17  -2   21.85    1.31
  -1  17  -2   22.53    1.45
   1  17   2   23.70    1.37
  -1  17  -2   23.68    1.55
   3  17  -2   13.24    1.04
  -3  17   2   12.34    1.05
  -3 -17  -2   11.84    1.04
  -3  17   2   11.40    0.92
  -3 -17   2   11.52    1.04
   3 -17  -2   13.09    1.12
  -3 -17   2   13.08    1.08
   3 -17  -2   13.44    1.08
   3 -17  -2   13.80    1.07
  -3  17  -2   10.37    0.93
   3  17   2   11.74    1.08
   3  17   2   13.93    1.07
  -3  17  -2   12.94    1.22
   5  17  -2   52.96    2.29
  -5 -17  -2   53.61    2.39
  -5  17   2   49.32    1.98
   5 -17  -2   50.39    2.13
  -5  17  -2   46.90    2.21
   5  17   2   53.09    2.43
  -5 -17   2   52.99    2.50
  -5 -17   2   48.15    2.49
  -5  17  -2   49.84    2.80
   5 -17  -2   49.94    2.66
   5 -17  -2   51.78    2.12
   7  17  -2   74.55    3.34
  -7 -17  -2   83.74    3.38
  -7  17  -2   78.50    3.99
   7 -17  -2   82.35    3.10
  -7 -17   2   79.04    3.55
   7  17   2   84.92    3.51
   7 -17  -2   75.29    3.08
  -9 -17  -2   49.41    2.62
   9  17  -2   45.63    2.61
   9  17   2   50.91    2.82
  -9  17  -2   47.01    3.18
   9 -17  -2   44.04    2.29
  -9 -17   2   50.49    2.87
  11  17  -2   18.74    1.69
  11 -17   2   23.06    1.66
 -11 -17  -2   22.61    1.77
 -11 -17   2   17.79    1.82
 -11  17  -2   21.04    2.18
  11  17   2   19.75    1.82
  11 -17  -2   20.23    1.53
  13  17  -2    4.34    1.37
  13 -17   2    4.07    1.20
 -13 -17  -2    7.71    1.55
  13 -17  -2    4.60    1.39
 -13 -17   2    3.82    1.55
  13  17   2    5.36    1.42
  15  17  -2   -0.31    1.53
  15 -17   2    0.75    1.38
 -15 -17  -2    1.26    1.45
 -15 -17   2    1.44    1.47
  15  17   2    0.82    1.44
  15 -17  -2    2.02    1.63
  17 -17   2    1.42    1.69
  17 -17  -2    0.14    1.90
   0 -18  -2   26.44    1.50
   0 -18  -2   25.80    1.46
   0  18  -2   23.25    1.57
   0  18   2   21.95    1.51
   0  18   2   22.63    1.41
   0 -18   2   25.41    1.32
   0  18  -2   25.14    1.58
   0 -18   2   24.65    1.35
  -2 -18  -2    1.27    0.66
   2  18  -2    0.27    0.69
  -2 -18  -2   -0.10    0.61
   2  18  -2    0.40    0.44
  -2  18   2    0.07    0.67
  -2  18   2    0.05    0.53
   2  18   2    0.75    0.65
   2 -18  -2    0.05    0.55
  -2 -18   2    0.85    0.66
   2 -18  -2    0.90    0.57
   2  18   2    1.00    0.72
  -2  18  -2    1.42    0.80
   2 -18  -2    0.38    0.61
  -2  18  -2    0.19    0.64
  -2 -18   2    1.03    0.71
   4  18  -2    3.42    0.67
  -4 -18  -2    4.11    0.86
  -4  18   2    3.45    0.56
   4 -18  -2    4.83    0.69
   4 -18  -2    3.76    0.70
   4 -18  -2    4.38    0.89
  -4 -18   2    5.43    0.94
  -4  18  -2    4.36    1.07
   4  18   2    4.15    0.84
   4  18   2    2.69    0.83
  -4  18  -2    4.42    0.76
  -4 -18   2    4.53    0.92
   6  18  -2   13.98    1.18
  -6 -18  -2   12.28    1.19
  -6  18  -2   13.17    1.51
  -6 -18   2   13.67    1.31
   6 -18  -2   10.88    0.98
   6 -18  -2   14.66    1.20
   6  18   2   13.29    1.31
  -8 -18  -2   13.10    1.27
   8  18  -2   14.67    1.38
  -8  18  -2   15.50    1.75
   8 -18  -2   14.24    1.14
   8 -18  -2   12.17    1.06
  -8 -18   2   12.12    1.50
   8  18   2   13.18    1.41
  10  18  -2   34.89    2.51
 -10 -18  -2   38.23    2.56
 -10 -18   2   32.75    2.74
  10 -18  -2   39.89    2.19
  10  18   2   39.72    2.72
 -10  18  -2   42.37    3.17
  12  18  -2   23.62    1.92
  12 -18   2   27.91    1.91
 -12 -18  -2   26.27    2.19
  12 -18  -2   26.87    2.22
 -12 -18   2   22.44    2.11
  12  18   2   24.60    2.08
  14  18  -2    9.64    1.60
  14 -18   2    8.32    1.42
 -14 -18  -2    8.48    1.64
  14  18   2    8.54    1.77
 -14 -18   2    6.20    1.69
  14 -18  -2    9.62    1.65
  16 -18   2   10.08    1.70
 -16 -18  -2    6.35    1.96
 -16 -18   2    7.24    1.87
  16  18   2    4.67    1.67
  16 -18  -2    6.22    1.90
  -1 -19  -2    1.05    0.70
   1  19  -2    1.42    0.67
   1 -19   2    0.72    0.50
   1  19  -2    1.22    0.77
  -1  19   2    0.49    0.76
   1 -19   2    1.74    0.57
  -1  19   2    0.99    0.61
  -1 -19  -2    1.96    0.72
   1  19   2    1.15    0.79
  -1  19  -2    1.50    0.81
  -1  19  -2    0.95    0.69
   1 -19  -2    0.30    0.61
   1  19   2    0.29    0.65
   1 -19  -2    1.32    0.64
  -1 -19   2    2.23    0.70
  -1 -19   2    1.15    0.65
  -3 -19  -2   14.28    1.20
  -3  19   2   16.82    1.15
   3  19  -2   20.48    1.22
  -3  19   2   15.58    1.21
  -3  19  -2   16.85    1.51
   3  19   2   14.87    1.22
   3 -19  -2   19.30    1.31
  -3 -19   2   16.17    1.26
  -3 -19   2   15.52    1.26
  -3  19  -2   17.91    1.43
   3  19   2   18.39    1.52
   3 -19  -2   21.06    1.28
   5  19  -2   58.83    2.58
  -5 -19  -2   58.92    2.73
  -5 -19   2   62.66    2.87
  -5 -19   2   63.92    2.90
   5 -19  -2   60.62    2.46
   5  19   2   61.15    2.80
  -5  19  -2   60.34    3.25
  -5  19  -2   53.45    2.58
   5 -19  -2   57.10    2.48
   5 -19  -2   59.10    3.02
  -7 -19  -2   65.36    3.10
   7  19  -2   70.03    3.08
  -7  19  -2   69.56    3.71
   7 -19  -2   68.26    2.76
  -7 -19   2   65.84    3.24
   7 -19  -2   65.77    2.80
   7  19   2   72.91    3.29
  -9 -19  -2    7.60    1.29
   9  19  -2    8.02    1.22
  -9  19  -2    6.69    1.62
  -9 -19   2    9.43    1.45
   9  19   2    6.99    1.43
   9 -19  -2    5.56    0.96
  11  19  -2   38.36    2.71
 -11 -19  -2   39.35    2.79
 -11  19  -2   36.76    3.36
  11  19   2   41.15    2.87
  11 -19  -2   41.21    2.41
 -11 -19   2   40.19    2.95
  13 -19   2   12.45    1.40
 -13 -19  -2    9.01    1.79
  13  19  -2   10.51    1.74
  13  19   2    9.57    1.58
 -13 -19   2   10.57    1.77
  13 -19  -2   14.12    1.63
  15 -19   2    0.32    1.44
 -15 -19  -2    0.91    1.52
  15  19   2   -1.14    1.30
 -15 -19   2    1.59    1.59
  15 -19  -2   -1.06    1.60
   0 -20  -2    0.87    0.70
   0 -20   2    1.09    0.65
   0  20  -2    0.61    0.78
   0 -20   2    1.09    0.58
   0  20  -2    1.49    0.85
   0  20   2    0.90    0.67
   0 -20  -2    0.14    0.72
   0  20   2    1.77    0.81
  -2  20   2    6.13    0.77
  -2  20   2    6.49    0.99
   2  20  -2    6.59    1.07
   2  20  -2    6.68    0.66
  -2 -20  -2    6.06    0.89
   2 -20   2    5.94    0.69
  -2 -20  -2    6.89    0.95
   2  20   2    5.58    0.95
   2  20   2    6.90    0.93
  -2 -20   2    6.71    0.96
  -2  20  -2    6.16    0.94
   2 -20  -2    6.20    0.82
  -2  20  -2    7.96    1.14
   2 -20  -2    7.14    0.81
  -2 -20   2    7.04    0.89
  -4 -20  -2   35.65    2.06
   4  20  -2   39.79    1.88
  -4  20   2   37.26    2.04
   4  20   2   35.73    2.14
  -4 -20   2   37.29    2.19
   4  20   2   38.63    2.11
  -4 -20   2   39.08    2.24
   4 -20  -2   40.85    1.83
  -4  20  -2   34.21    2.00
  -4  20  -2   37.22    2.54
   6  20  -2   10.41    1.10
  -6 -20  -2    9.72    1.17
   6  20   2   10.88    1.30
  -6  20  -2   11.10    1.50
  -6 -20   2   11.04    1.31
  -6  20  -2   10.64    1.12
   6 -20  -2   10.58    0.94
   6 -20  -2    9.50    0.99
  -8 -20  -2    3.67    1.13
   8  20  -2    3.20    1.06
  -8  20  -2    4.41    1.47
   8  20   2    5.44    1.28
   8 -20  -2    1.74    0.88
  -8 -20   2    3.94    1.30
 -10 -20  -2    0.49    1.15
 -10  20  -2   -0.76    1.52
  10  20   2    0.64    1.19
 -10 -20   2    0.81    1.35
  10 -20  -2   -1.22    0.89
 -12 -20  -2    4.07    1.38
 -12 -20   2    3.90    1.69
  12 -20  -2    5.45    1.35
  12  20   2    4.97    1.44
 -14 -20  -2   16.34    2.16
  14 -20   2   21.29    1.77
 -14 -20   2   14.98    2.00
  14 -20  -2   21.66    1.98
  14  20   2   15.49    1.80
   1 -21   2    1.30    0.58
  -1  21   2    0.97    0.80
  -1  21   2    0.63    0.68
   1  21  -2    1.31    0.90
  -1 -21  -2    0.13    0.77
   1 -21   2    2.29    0.68
  -1  21  -2    1.19    0.92
   1 -21  -2    0.60    0.69
  -1 -21   2   -0.19    0.62
  -1 -21   2    0.88    0.77
  -1  21  -2    0.81    0.88
   1  21   2    0.46    0.85
   1 -21  -2   -0.19    0.76
   1  21   2    1.49    0.78
  -3 -21  -2    3.59    0.94
  -3  21   2    5.48    1.02
  -3 -21   2    4.70    0.98
   3  21   2    3.36    0.97
  -3  21  -2    2.15    0.92
  -3  21  -2    1.54    1.10
   3  21   2    2.12    0.89
   3 -21  -2    2.75    0.78
   3 -21  -2    3.46    0.75
  -5 -21  -2    6.74    1.08
  -5  21   2    6.59    1.07
  -5  21  -2    6.61    1.00
   5 -21  -2    5.36    0.90
   5  21   2    7.74    1.26
  -5  21  -2    7.01    1.41
  -5 -21   2    7.95    1.23
  -7 -21  -2   13.52    1.36
  -7  21  -2   20.10    1.93
   7 -21  -2   11.70    1.19
  -7  21  -2   14.17    1.34
  -7 -21   2   13.72    1.59
   7  21   2   16.37    1.55
  -9 -21  -2    0.21    1.09
   9  21   2   -2.62    1.25
  -9 -21   2    0.23    1.37
   9 -21  -2   -1.80    0.90
  -9  21  -2    0.92    1.50
 -11 -21  -2    5.89    1.53
  11 -21  -2    6.81    1.16
 -11 -21   2    5.42    1.54
  11  21   2    6.35    1.45
 -13 -21  -2   26.73    2.37
  13 -21  -2   28.84    2.09
 -13 -21   2   24.60    2.35
 -15 -21  -2   -0.23    1.72
 -15 -21   2   -0.36    1.56
  15 -21  -2   -1.20    1.67
   0  22   2    2.28    0.98
   0 -22   2    2.14    0.71
   0  22  -2    2.03    0.88
   0 -22  -2    1.87    0.85
   0 -22   2    1.21    0.76
   0  22  -2    1.68    0.91
   2 -22   2    0.75    0.57
   2  22  -2    1.16    1.00
  -2 -22  -2    0.29    0.83
  -2  22   2   -0.28    0.88
   2 -22   2    1.20    0.69
   2  22   2    2.34    1.00
  -2  22  -2    0.88    1.02
  -2  22  -2    1.79    0.96
   2 -22  -2    1.48    0.80
  -2 -22   2    0.40    0.89
  -4  22   2   27.78    1.95
  -4 -22  -2   26.81    1.92
   4 -22  -2   28.66    1.75
  -4  22  -2   25.81    1.87
  -4  22  -2   24.84    2.42
   4  22   2   25.27    2.05
  -4 -22   2   26.91    2.07
   4  22   2   28.44    2.07
  -6 -22  -2   50.15    2.61
   6  22   2   48.46    2.80
  -6  22  -2   49.69    3.24
  -6  22  -2   46.09    2.46
   6 -22  -2   47.18    2.35
  -6 -22   2   47.29    2.73
  -8 -22  -2    0.45    1.05
  -8 -22   2    2.56    1.34
  -8  22  -2    1.34    1.44
  -8  22  -2    0.07    0.97
   8  22   2    1.47    1.37
   8 -22  -2   -2.52    0.89
 -10 -22  -2    5.81    1.51
  10 -22  -2    3.53    1.10
 -10 -22   2    5.93    1.55
 -12 -22  -2   19.57    1.99
 -12 -22   2   14.92    2.03
  12 -22  -2   17.69    1.60
 -14 -22  -2    7.75    1.88
 -14 -22   2    8.90    1.81
  14 -22  -2    9.87    1.87
   1  23  -2    7.63    1.23
  -1  23   2    6.52    1.13
  -1 -23  -2    6.58    1.01
   1 -23   2    6.75    0.81
   1 -23   2    6.21    0.88
  -1 -23   2    5.58    0.98
   1  23   2    6.42    1.19
  -1  23  -2    6.91    1.11
   1 -23  -2    5.95    0.99
  -1  23  -2    5.34    1.13
  -3 -23  -2    3.31    1.04
  -3  23   2    0.24    0.96
  -3 -23   2    1.45    1.01
   3 -23  -2    3.22    0.90
  -3  23  -2    0.23    1.20
   3  23   2    1.65    1.06
  -3  23  -2    0.46    0.99
  -5 -23  -2   70.90    3.32
  -5  23   2   73.29    3.28
  -5  23  -2   67.80    3.18
  -5 -23   2   76.76    3.45
   5 -23  -2   76.47    3.06
  -5  23  -2   69.10    3.91
  -7 -23  -2   47.62    2.68
  -7  23  -2   42.95    2.55
  -7 -23   2   49.57    2.93
   7 -23  -2   41.57    2.29
  -7  23  -2   48.94    3.33
  -9 -23  -2    4.35    1.38
   9 -23  -2    4.99    1.10
  -9 -23   2    4.51    1.54
 -11 -23  -2   18.66    1.97
 -11 -23   2   15.64    2.01
  11 -23  -2   28.72    2.10
 -13 -23  -2   30.94    2.75
 -13 -23   2   26.89    2.46
  13 -23  -2   25.63    2.02
   0 -24  -2    0.35    0.91
   0  24  -2    0.08    1.01
   0 -24   2    1.11    0.87
   0  24   2   -0.61    1.00
  -2  24   2    3.03    1.06
   2 -24   2    1.82    0.84
  -2 -24  -2    4.04    1.04
   2 -24   2    3.61    0.74
   2  24  -2    4.02    1.16
   2 -24  -2    3.19    0.99
   2  24   2    3.53    1.15
  -2  24  -2    3.45    1.13
  -2 -24   2    3.07    1.06
  -2  24  -2    3.96    1.24
  -4 -24  -2   15.75    1.51
  -4  24   2   17.63    1.59
  -4  24  -2   17.67    1.83
  -4 -24   2   17.33    1.61
  -4  24  -2   16.26    1.47
   4 -24  -2   15.56    1.29
  -6 -24  -2   35.82    2.49
  -6  24   2   39.69    2.45
  -6 -24   2   37.17    2.66
  -6  24  -2   43.80    3.06
  -6  24  -2   34.79    2.33
  -8 -24  -2    0.51    1.25
   8 -24  -2   -0.72    0.98
  -8  24  -2   -0.57    1.04
  -8 -24   2    1.00    1.44
 -10 -24  -2    1.07    1.47
  10 -24  -2    2.18    1.12
 -10 -24   2    0.88    1.48
  12 -24  -2   33.50    2.42
 -12 -24   2   21.08    2.47
  -1  25   2    2.61    1.08
   1  25  -2    3.32    1.25
  -1 -25  -2    1.93    1.02
   1 -25   2    1.68    0.90
  -1  25  -2    3.78    1.22
   1 -25  -2    4.61    1.08
  -1 -25   2    2.30    1.06
   1  25   2    1.52    1.19
  -3  25   2    5.45    1.22
  -3 -25  -2    2.51    1.14
   3  25   2    2.90    1.26
   3 -25  -2    2.73    1.05
  -3 -25   2    3.90    1.19
  -3  25  -2    2.60    1.13
  -5 -25  -2   48.57    2.83
  -5  25   2   52.45    2.80
   5 -25  -2   55.55    2.58
  -5 -25   2   53.05    2.99
  -5  25  -2   47.50    2.73
  -7  25   2   11.71    1.55
  -7 -25  -2    9.49    1.45
  -7  25  -2   10.21    1.35
  -7 -25   2    8.19    1.59
  -9 -25  -2    3.46    1.40
  -9 -25   2    4.69    1.64
   9 -25  -2    2.52    1.15
  -9  25  -2    2.87    1.26
 -11 -25  -2    5.26    1.65
 -11 -25   2    4.70    1.74
  11 -25  -2    4.73    1.35
   0  26  -2   -0.88    1.10
   0 -26  -2   -1.17    1.05
   0 -26   2    0.16    0.98
   0  26   2   -0.24    1.11
  -2  26   2    2.15    1.23
   2 -26   2    1.61    0.91
  -2 -26  -2    0.53    1.07
   2  26  -2    2.45    1.30
   2 -26  -2    1.86    1.04
  -2  26  -2    0.81    1.19
   2  26   2    1.13    1.26
  -2 -26   2    1.50    1.15
  -4  26   2    1.92    1.23
  -4 -26  -2    2.75    1.18
  -4  26  -2    2.55    1.20
  -4 -26   2    2.51    1.31
   4 -26  -2    1.36    1.07
  -6 -26  -2   11.67    1.50
  -6  26   2   14.43    1.64
  -6  26  -2   13.78    1.51
   6 -26  -2   14.29    1.42
  -6 -26   2   10.46    1.60
  -8 -26  -2    0.91    1.41
  -8  26   2    3.78    1.46
   8 -26  -2    4.18    1.16
  -8 -26   2    0.00    1.63
  -8  26  -2    5.40    1.43
 -10 -26  -2    2.31    1.47
 -10  26  -2    0.85    1.41
  10 -26  -2    1.93    1.27
 -10 -26   2    0.18    1.70
  12 -26  -2   22.51    1.95
  -1 -27  -2    0.39    1.15
  -1  27   2    0.24    1.19
   1  27  -2   -0.92    1.27
   1 -27   2   -0.74    1.02
  -1  27  -2    0.03    1.16
   1  27   2    2.49    1.30
  -1 -27   2    0.52    1.14
   1 -27  -2   -0.40    1.09
  -3 -27  -2    2.18    1.24
  -3  27   2    4.53    1.30
   3 -27  -2    5.01    1.20
  -3  27  -2    4.75    1.34
   3  27   2    4.60    1.44
  -3 -27   2    5.41    1.37
  -5 -27  -2    2.95    1.24
  -5  27   2    3.80    1.34
   5 -27  -2    2.69    1.18
  -5  27  -2    4.94    1.30
  -5 -27   2    3.28    1.44
  -7 -27  -2    3.78    1.36
  -7  27   2    3.79    1.36
  -7 -27   2    2.69    1.65
   7 -27  -2    3.41    1.28
  -7  27  -2    2.93    1.28
  -9  27   2    6.22    1.55
  -9 -27  -2    3.68    1.54
   9 -27  -2    3.29    1.29
  -9  27  -2    2.28    1.49
  -9 -27   2    3.95    1.84
 -11 -27  -2    5.09    1.77
 -11 -27   2   10.21    2.11
  11 -27  -2    7.61    1.56
   0 -28   2    1.65    1.19
   0 -28  -2   -1.23    1.16
   0  28  -2    2.47    1.36
   0  28   2    1.67    1.33
  -2 -28  -2    0.19    1.17
   2 -28   2    1.00    1.06
  -2  28   2    0.63    1.30
   2  28  -2    1.83    1.45
   2  28   2    1.84    1.39
  -2  28  -2    0.62    1.33
   2 -28  -2    0.29    1.20
  -2 -28   2    2.26    1.29
  -4  28   2   10.90    1.54
  -4 -28  -2   10.28    1.47
  -4 -28   2   11.40    1.68
  -4  28  -2   12.01    1.53
   4 -28  -2   10.20    1.44
  -6 -28  -2    7.70    1.51
  -6  28   2    6.75    1.53
  -6  28  -2    8.24    1.50
   6 -28  -2    5.74    1.36
  -6 -28   2    6.80    1.67
  -8 -28  -2   11.10    1.72
  -8  28   2   15.00    1.81
  -8  28  -2   13.60    1.74
  -8 -28   2   12.70    2.04
   8 -28  -2   16.44    1.68
 -10 -28  -2    4.65    1.70
  10 -28  -2    1.75    1.41
 -10 -28   2    3.87    1.88
   1  29  -2    2.64    1.51
   1 -29   2    1.44    1.19
  -1  29   2   -0.41    1.39
  -1 -29  -2   -0.16    1.31
  -1  29  -2    0.38    1.43
   1 -29  -2    1.58    1.32
  -1 -29   2    0.28    1.30
   1  29   2    1.97    1.40
  -3 -29  -2    4.55    1.47
  -3  29   2    3.49    1.38
   3  29   2    6.61    1.58
  -3  29  -2    2.75    1.35
   3 -29  -2    2.86    1.34
  -3 -29   2    5.28    1.52
  -5  29   2    1.94    1.48
  -5 -29  -2    4.32    1.46
  -5  29  -2    5.23    1.48
  -5 -29   2    4.85    1.66
   5 -29  -2    4.50    1.37
  -7  29   2   10.08    1.73
  -7 -29  -2    7.05    1.62
  -7  29  -2    8.54    1.57
  -7 -29   2    9.56    1.92
   7 -29  -2   11.39    1.56
   0 -30  -2   10.57    1.59
   0  30  -2   12.19    1.72
   0 -30   2    9.01    1.50
   0  30   2   11.52    1.85
   2 -30   2    1.61    1.23
  -2 -30  -2    0.30    1.36
  -2  30   2    0.50    1.35
  -2  30  -2   -0.09    1.39
   2  30   2   -0.72    1.51
   2 -30  -2   -0.66    1.35
  -2 -30   2    0.19    1.43
  -4 -30  -2   -0.72    1.33
  -4  30   2    0.90    1.37
  -4  30  -2   -1.65    1.29
  -4 -30   2    0.57    1.61
   4 -30  -2   -2.48    1.33
  -6 -30  -2    5.01    1.59
  -6  30   2    6.21    1.68
   6 -30  -2    6.42    1.57
  -6 -30   2    7.73    1.87
  -6  30  -2    8.70    1.61
   1 -31   2    6.36    1.43
   1  31  -2    1.20    1.67
  -1 -31  -2    2.13    1.50
  -1  31   2    3.92    1.63
  -1  31  -2    4.23    1.56
   1  31   2    5.14    1.76
  -1 -31   2    2.91    1.53
   1 -31  -2    1.76    1.51
  -3  31   2    2.43    1.51
  -3 -31  -2    0.02    1.43
   3 -31  -2   -0.46    1.43
  -3  31  -2    2.53    1.52
  -3 -31   2    1.02    1.62
  -5  31   2   -0.53    1.49
  -5 -31  -2    2.89    1.59
  -5  31  -2    0.78    1.49
  -5 -31   2   -1.22    1.64
   5 -31  -2    1.28    1.46
   0  32   2   -2.18    1.56
   0 -32   2   -1.99    1.45
   0 -32  -2    1.19    1.53
   0  32  -2    0.59    1.63
   2 -32   2    2.26    1.38
  -2 -32  -2    3.22    1.59
  -2  32   2    1.89    1.62
  -2  32  -2    1.29    1.63
   2  32   2    0.90    1.71
  -2 -32   2    0.29    1.60
   2 -32  -2   -2.67    1.51
   0   0  -3    0.03    0.28
   0   0   3   -0.11    0.27
   0   0  -3   -0.16    0.22
   0   0   3   -0.14    0.22
   2   0   3   16.29    0.77
   2   0  -3   15.71    0.81
  -2   0   3   16.76    0.80
   2   0   3   14.88    0.79
  -2   0  -3   15.77    0.75
  -2   0   3   16.05    0.86
   4   0  -3    1.59    0.37
   4   0   3    0.49    0.30
   4   0   3    0.71    0.33
  -4   0   3    0.68    0.42
  -4   0  -3    0.75    0.31
   6   0   3  149.34    4.93
  -6   0  -3  138.19    4.89
   6   0   3  133.41    4.90
   6   0  -3  142.34    4.96
  -6   0   3  139.74    5.01
   8   0  -3  134.50    4.78
   8   0   3  123.74    4.69
  -8   0   3  129.56    4.80
  -8   0  -3  128.73    4.68
   8   0   3  142.73    4.74
  -8   0  -3  125.95    5.34
  10   0  -3  116.66    4.48
 -10   0  -3  114.91    5.00
  10   0   3  117.31    4.43
 -10   0  -3  120.30    4.39
 -10   0   3  118.51    4.50
  12   0  -3   77.77    3.38
 -12   0  -3   77.46    3.73
 -12   0   3   73.20    3.34
 -12   0  -3   75.65    3.18
  12   0   3   74.72    3.30
 -14   0  -3   13.33    1.58
 -14   0   3   15.49    1.52
 -14   0  -3   13.51    1.34
  14   0  -3   10.61    1.39
  14   0   3   11.30    1.33
  16   0   3    3.77    1.38
 -16   0   3    0.68    1.22
  16   0  -3    1.99    1.29
  18   0   3   15.64    1.94
  18   0  -3   17.30    2.05
  -1   1   3   31.15    1.26
   1   1  -3   32.22    1.28
  -1  -1  -3   32.27    1.25
   1  -1   3   30.65    1.24
   1  -1   3   33.10    1.24
   1   1  -3   33.65    1.26
  -1   1   3   32.21    1.29
   1  -1  -3   31.59    1.27
   1   1   3   31.34    1.27
   1   1   3   34.17    1.27
  -1  -1   3   32.87    1.29
  -1  -1   3   32.46    1.25
  -1   1  -3   31.78    1.22
   1  -1  -3   33.93    1.29
  -3   1   3   47.21    1.86
   3  -1   3   51.66    1.78
   3  -1   3   47.21    1.78
  -3  -1  -3   46.15    1.78
   3   1  -3   47.68    1.83
   3   1   3   51.03    1.82
   3   1   3   48.11    1.82
  -3  -1   3   49.18    1.88
   3  -1  -3   47.48    1.83
  -3   1  -3   46.38    1.75
  -3  -1   3   50.92    1.83
   3  -1  -3   49.36    1.86
  -5   1   3   30.46    1.38
   5  -1   3   28.75    1.25
   5  -1   3   30.68    1.24
  -5  -1  -3   26.62    1.24
   5   1  -3   29.00    1.34
   5   1   3   27.38    1.28
  -5  -1   3   29.13    1.43
   5  -1  -3   29.24    1.33
   5   1   3   30.99    1.28
  -5   1  -3   26.89    1.21
  -7  -1  -3  366.85   14.15
   7  -1   3  384.70   12.46
  -7   1   3  362.31   12.51
  -7  -1  -3  356.98   12.43
   7  -1   3  348.55   12.42
   7   1  -3  375.79   12.50
  -7   1  -3  364.58   14.17
   7  -1  -3  373.31   12.49
   7   1   3  360.78   12.46
   7   1   3  395.28   12.49
  -7   1  -3  354.59   12.42
  -7  -1   3  369.10   12.55
   9  -1   3  326.68   10.87
   9   1  -3  324.28   10.94
  -9   1   3  319.14   10.93
  -9  -1  -3  317.73   10.86
  -9  -1  -3  316.53   12.34
   9  -1   3  308.81   10.84
   9   1   3  312.06   10.87
  -9   1  -3  312.45   10.83
  -9   1  -3  312.78   12.36
  -9  -1   3  308.96   10.95
   9  -1  -3  322.94   10.92
 -11   1   3   89.75    3.73
  11   1  -3   93.84    3.79
  11  -1   3   88.12    3.68
 -11  -1  -3   89.38    4.15
 -11  -1  -3   98.88    3.68
  11  -1  -3   90.63    3.75
 -11   1  -3   94.72    3.61
 -11  -1   3   94.20    3.82
  11   1   3   91.83    3.73
 -11   1  -3   88.45    4.18
  13  -1   3    1.26    0.89
 -13  -1  -3    4.06    0.95
 -13   1   3    2.55    0.96
 -13  -1  -3    4.14    1.14
  13   1  -3    2.65    1.02
  13   1   3    3.11    0.98
 -13   1  -3    1.67    0.89
 -13  -1   3    3.89    1.08
 -13   1  -3    3.01    1.10
  13  -1  -3    1.07    1.11
 -15   1   3   11.57    1.45
  15   1  -3   12.57    1.52
  15  -1   3    9.06    1.35
 -15  -1  -3   12.65    1.59
  15  -1  -3   11.28    1.49
 -15  -1   3   10.12    1.49
  15   1   3   11.17    1.46
 -15   1  -3   10.88    1.54
  17  -1   3    0.67    1.34
  17   1  -3    2.93    1.50
  17   1   3   -1.33    1.32
  17  -1  -3   -0.83    1.41
  19  -1   3    5.07    1.74
  19   1  -3    4.41    1.79
  19  -1  -3    6.08    2.01
  19   1   3    4.41    1.81
   0   2   3  108.46    3.81
   0  -2   3  109.58    3.78
   0  -2  -3  110.74    3.80
   0   2  -3  110.29    3.76
   0  -2   3  108.76    3.77
   0   2   3  114.70    3.80
  -2   2   3   51.16    1.95
  -2   2   3   52.49    1.94
  -2  -2  -3   54.27    1.93
   2   2  -3   54.59    1.94
   2  -2   3   50.80    1.89
   2   2   3   51.18    1.95
  -2  -2   3   51.07    1.97
   2  -2  -3   55.02    1.98
   2  -2  -3   54.20    1.95
  -2  -2   3   54.44    1.95
   2   2   3   55.35    1.95
  -2   2  -3   50.67    1.86
  -4   2   3   58.85    2.31
   4   2  -3   62.83    2.30
  -4  -2  -3   61.37    2.27
   4  -2   3   59.55    2.22
   4  -2   3   63.75    2.22
   4   2   3   59.58    2.28
  -4  -2   3   61.88    2.38
   4   2   3   63.04    2.28
  -4   2  -3   58.91    2.20
   4  -2  -3   67.18    2.33
   4  -2  -3   63.54    2.30
  -6   2   3  131.33    4.62
   6  -2   3  123.29    4.52
  -6  -2  -3  128.98    4.56
   6  -2   3  136.81    4.55
   6   2  -3  127.99    4.62
  -6  -2   3  128.41    4.69
   6  -2  -3  133.56    4.61
   6   2   3  129.24    4.59
  -6   2  -3  124.75    4.52
   6   2   3  134.28    4.59
   8  -2   3   76.76    2.87
   8  -2   3   72.73    2.87
  -8  -2  -3   73.49    2.88
   8   2  -3   74.45    3.00
  -8  -2  -3   72.98    3.25
  -8   2   3   72.85    2.95
   8   2   3   72.79    2.92
  -8   2  -3   76.40    3.32
   8  -2  -3   77.98    2.98
  -8   2  -3   78.71    2.87
  -8  -2   3   76.08    3.07
 -10   2   3  115.96    4.43
 -10  -2  -3  114.58    4.94
  10  -2   3  115.32    4.35
 -10  -2  -3  115.47    4.37
  10   2  -3  121.77    4.51
  10  -2   3  110.30    4.36
 -10   2  -3  116.71    5.02
 -10  -2   3  116.41    4.51
  10   2   3  115.58    4.42
  10  -2  -3  121.84    4.48
 -10   2  -3  121.00    4.33
 -12  -2  -3   96.77    4.41
  12   2  -3   98.51    4.06
 -12  -2  -3   98.54    3.91
  12  -2   3   95.60    3.91
 -12   2   3   99.05    3.95
  12   2   3   94.04    3.98
 -12  -2   3   98.48    4.05
 -12   2  -3   97.31    3.81
  12  -2  -3   97.18    4.00
 -12   2  -3   91.00    4.46
 -14  -2  -3   10.42    1.32
 -14   2   3    7.52    1.19
  14  -2   3    8.49    1.33
  14   2  -3    9.10    1.34
 -14  -2  -3    9.23    1.38
 -14  -2   3    8.10    1.36
  14   2   3    8.98    1.39
 -14   2  -3    6.78    1.43
  14  -2  -3    8.15    1.41
  16   2  -3   16.39    1.93
  16  -2   3   14.07    1.64
  16  -2  -3   15.71    1.81
  16   2   3   14.30    1.64
 -16  -2   3   15.98    1.66
  18   2  -3   15.14    1.91
  18  -2   3   13.50    1.90
  18   2   3   16.93    2.10
  18  -2  -3   13.82    2.05
  -1  -3  -3   21.21    0.94
  -1   3   3   21.71    0.93
   1  -3   3   20.59    0.88
   1  -3   3   20.92    0.85
  -1  -3  -3   20.88    0.93
   1   3  -3   20.81    0.89
   1   3   3   20.63    0.97
   1   3   3   20.95    0.82
   1  -3  -3   20.96    0.97
  -1  -3   3   20.09    0.95
  -1  -3   3   21.16    0.90
   1  -3  -3   20.38    0.94
  -1   3  -3   20.90    0.83
   1   3   3   24.01    0.98
   3  -3   3   21.40    0.94
   3  -3   3   23.22    0.93
  -3  -3  -3   22.90    1.02
  -3  -3  -3   22.40    0.91
   3   3  -3   22.40    1.04
  -3   3   3   21.96    1.05
   3  -3  -3   23.87    1.06
   3   3   3   25.25    1.07
   3  -3  -3   23.83    1.08
  -3  -3   3   24.55    1.06
  -3  -3   3   24.12    1.17
  -3   3  -3   20.33    0.90
   5  -3   3   43.12    1.64
   5   3  -3   45.99    1.78
  -5  -3  -3   42.06    1.72
   5  -3   3   41.14    1.63
  -5   3   3   43.03    1.75
  -5  -3   3   43.38    1.90
   5   3   3   40.05    1.73
   5  -3  -3   43.41    1.75
  -5   3  -3   39.72    1.62
   5   3   3   45.01    1.72
   5  -3  -3   42.44    1.74
   7   3  -3  122.35    4.35
   7  -3   3  112.16    4.21
  -7  -3  -3  123.59    4.83
   7  -3   3  122.20    4.23
  -7  -3  -3  119.89    4.28
  -7   3   3  119.42    4.30
  -7   3  -3  117.05    4.22
  -7  -3   3  120.76    4.44
   7   3   3  117.53    4.30
  -7   3  -3  114.63    4.88
   7  -3  -3  120.76    4.32
  -9  -3  -3    4.04    0.75
   9  -3   3    4.21    0.71
   9   3  -3    3.61    0.81
  -9   3   3    3.55    0.80
  -9  -3  -3    5.24    0.82
   9  -3   3    4.08    0.65
   9   3   3    4.52    0.75
   9  -3  -3    4.34    0.79
  -9  -3   3    4.38    0.89
  -9   3  -3    5.35    0.94
  -9   3  -3    4.37    0.67
 -11  -3  -3   96.30    3.75
  11  -3   3   92.81    3.73
  11   3  -3   95.50    3.89
  11  -3   3   96.29    3.69
 -11  -3  -3   93.51    4.21
 -11   3   3   91.10    3.75
  11  -3  -3   93.31    3.84
 -11   3  -3   96.27    4.32
 -11  -3   3   95.27    3.92
  11   3   3   90.66    3.81
 -11   3  -3   95.23    3.64
 -13  -3  -3   12.55    1.33
  13  -3   3   10.08    1.23
 -13   3   3   10.87    1.25
  13   3  -3   12.61    1.53
 -13  -3  -3   14.38    1.47
 -13   3  -3   12.99    1.18
  13   3   3   11.88    1.41
  13  -3  -3   11.81    1.49
 -13  -3   3   14.27    1.43
 -13   3  -3   12.13    1.49
 -15   3   3   14.88    1.54
  15   3  -3   18.76    1.88
 -15  -3  -3   19.04    1.66
  15  -3   3   16.94    1.57
  15   3   3   14.46    1.57
 -15   3  -3   13.10    1.68
 -15  -3   3   16.32    1.68
  15  -3  -3   17.10    1.81
  17   3  -3    6.54    1.63
  17  -3   3    5.27    1.52
  17  -3  -3    4.86    1.69
  17   3   3    6.95    1.58
 -17  -3   3    4.04    1.38
  19   3  -3    7.41    1.94
  19  -3   3    8.07    1.81
  19   3   3   10.63    1.93
  19  -3  -3    7.76    1.99
   0  -4   3  201.91    6.85
   0  -4  -3  215.72    7.04
   0  -4  -3  208.98    7.04
   0   4  -3  206.85    6.97
   0  -4   3  195.60    6.99
   0   4   3  218.63    7.04
   0  -4   3  208.21    6.98
  -2   4   3  170.63    5.91
   2  -4   3  171.73    5.83
   2  -4   3  166.21    5.83
   2   4  -3  171.97    5.88
  -2  -4  -3  174.04    5.75
   2   4   3  170.25    5.92
   2  -4  -3  181.73    5.93
   2   4   3  182.22    5.92
  -2  -4   3  172.15    5.94
  -2  -4   3  175.01    5.90
   2  -4  -3  175.86    5.92
   2   4   3  170.86    5.75
   4  -4   3    0.23    0.27
  -4   4   3    0.61    0.37
  -4  -4  -3    0.23    0.32
   4   4  -3   -0.01    0.37
   4  -4   3    0.25    0.25
  -4  -4   3    0.49    0.36
  -4   4  -3    0.53    0.26
  -4  -4   3    0.29    0.52
   4  -4  -3    0.21    0.37
   4   4   3   -0.07    0.39
   4  -4  -3    0.31    0.38
  -6   4   3   78.31    2.93
   6   4  -3   80.08    2.98
   6  -4   3   78.62    2.84
  -6  -4  -3   81.56    2.93
   6  -4   3   75.26    2.83
   6  -4  -3   79.11    2.93
  -6  -4   3   78.32    3.10
   6   4   3   80.04    2.96
  -6   4  -3   72.19    2.82
   6  -4  -3   82.30    2.94
   8  -4   3    3.43    0.60
   8   4  -3    3.96    0.73
  -8  -4  -3    3.72    0.64
  -8  -4  -3    4.19    0.69
  -8   4   3    2.96    0.67
   8  -4   3    3.63    0.58
   8   4   3    3.84    0.69
  -8   4  -3    4.57    0.60
   8  -4  -3    3.74    0.70
  -8  -4   3    4.13    0.88
  -8   4  -3    5.56    0.85
  10  -4   3   54.85    2.33
 -10   4   3   53.48    2.41
 -10  -4  -3   54.03    2.68
  10   4  -3   51.36    2.54
 -10  -4  -3   52.29    2.41
  10  -4   3   51.97    2.38
 -10  -4   3   57.84    2.65
 -10   4  -3   50.48    2.77
  10   4   3   54.01    2.49
  10  -4  -3   56.27    2.51
 -10   4  -3   52.94    2.28
  12  -4   3   26.40    1.86
  12   4  -3   31.23    2.15
  12  -4   3   26.35    1.77
 -12  -4  -3   31.18    1.97
 -12   4   3   29.26    1.93
 -12  -4  -3   30.62    2.11
 -12   4  -3   30.22    1.72
  12   4   3   27.37    2.08
 -12   4  -3   28.61    2.28
 -12  -4   3   27.96    2.18
  12  -4  -3   25.96    2.05
 -14   4   3    2.31    1.01
 -14  -4  -3    2.36    1.11
 -14  -4  -3    1.33    1.07
  14  -4   3    0.78    0.99
  14   4  -3    1.77    1.17
 -14   4  -3    1.67    1.24
  14  -4  -3    2.77    1.30
 -14  -4   3    3.39    1.20
  14   4   3    2.87    1.10
  16  -4   3   58.71    3.14
  16   4  -3   57.96    3.38
 -16  -4   3   54.30    3.25
  16   4   3   51.90    3.23
 -16   4  -3   53.93    3.53
  16  -4  -3   52.60    3.33
  18   4  -3    6.51    1.75
  18  -4   3    6.82    1.69
  18   4   3    6.99    1.81
  18  -4  -3    4.82    1.68
   1   5  -3   81.04    2.78
  -1  -5  -3   81.66    2.85
   1  -5   3   79.95    2.75
  -1   5   3   84.74    2.86
   1  -5   3   77.27    2.76
  -1  -5  -3   86.54    2.87
  -1  -5   3   77.92    2.85
   1   5   3   79.10    2.86
  -1  -5   3   77.34    2.76
   1   5   3   78.51    2.74
  -1  -5   3   79.92    2.80
   1  -5  -3   79.33    2.85
  -1   5  -3   77.45    2.73
   1  -5  -3   83.91    2.86
  -3  -5  -3  146.93    5.04
  -3   5   3  146.64    5.03
  -3  -5  -3  149.18    4.89
   3  -5   3  141.38    4.92
   3   5  -3  147.74    5.02
   3  -5   3  138.33    4.92
   3  -5  -3  144.16    5.03
  -3  -5   3  147.22    5.04
  -3  -5   3  148.16    5.12
   3  -5  -3  153.93    5.05
   3   5   3  143.15    5.05
  -5  -5  -3   53.02    2.13
   5  -5   3   53.57    2.00
   5   5  -3   55.15    2.16
  -5   5   3   54.87    2.12
   5  -5   3   51.54    1.99
   5  -5  -3   56.16    2.13
   5   5   3   54.24    2.16
   5  -5  -3   60.36    2.15
  -5  -5   3   54.26    2.32
   7   5  -3   18.43    1.29
   7  -5   3   17.43    1.03
   7  -5   3   17.64    1.04
  -7   5   3   17.04    1.14
  -7  -5  -3   17.69    1.18
  -7  -5  -3   18.38    1.20
   7  -5  -3   18.84    1.20
  -7   5  -3   17.93    1.02
   7   5   3   19.67    1.23
   7  -5  -3   20.01    1.14
  -7   5  -3   17.25    1.33
  -7  -5   3   19.44    1.51
  -9   5   3   70.56    2.79
  -9  -5  -3   65.60    2.80
   9   5  -3   68.50    2.91
   9  -5   3   67.23    2.73
   9  -5   3   66.93    2.69
  -9  -5  -3   66.20    3.09
   9  -5  -3   70.14    2.85
   9   5   3   68.78    2.87
  -9   5  -3   71.32    2.66
  -9   5  -3   69.18    3.24
  -9  -5   3   69.99    3.05
 -11   5   3   36.44    1.91
  11  -5   3   33.06    1.77
 -11  -5  -3   32.27    1.97
  11  -5   3   29.76    1.84
 -11  -5  -3   32.14    2.09
  11   5  -3   29.16    2.06
 -11   5  -3   32.73    1.69
 -11  -5   3   31.77    2.13
  11  -5  -3   32.20    2.03
  11   5   3   36.10    2.09
 -11   5  -3   28.98    2.24
  13  -5   3   64.56    3.11
 -13  -5  -3   67.92    3.48
 -13  -5  -3   68.23    3.21
  13   5  -3   72.18    3.37
 -13   5   3   68.55    3.12
 -13  -5   3   76.22    3.40
 -13   5  -3   67.59    3.66
  13  -5  -3   68.40    3.29
  13   5   3   67.81    3.29
  15   5  -3    4.74    1.35
  15  -5   3    3.33    1.24
 -15  -5  -3    4.66    1.20
 -15  -5   3    5.28    1.36
  15  -5  -3    3.02    1.40
  15   5   3    3.60    1.35
 -15   5  -3    3.79    1.39
  17   5  -3   15.94    2.02
  17  -5   3   15.84    1.76
  17  -5  -3   14.46    1.93
  17   5   3   12.51    1.81
 -17  -5   3   15.81    1.82
  19  -5   3   10.61    1.88
  19   5  -3    9.24    1.92
  19   5   3   11.05    2.10
  19  -5  -3    9.96    2.05
   0  -6  -3   59.71    2.15
   0   6   3   57.84    2.15
   0  -6   3   58.41    2.06
   0   6  -3   54.85    2.05
   0  -6   3   56.65    2.09
   0  -6   3   58.19    2.05
   0  -6  -3   61.89    2.15
   0   6  -3   58.41    2.02
  -2  -6  -3  104.72    3.60
  -2  -6  -3  106.60    3.48
  -2   6   3   97.72    3.57
   2   6  -3   95.26    3.52
   2  -6  -3  102.42    3.58
  -2   6  -3   98.80    3.46
   2   6   3  102.12    3.61
   2   6   3  100.98    3.48
   2  -6  -3  110.91    3.61
  -2  -6   3  103.85    3.57
  -2  -6   3   98.62    3.50
  -2  -6   3  102.27    3.64
  -4   6   3    1.63    0.40
  -4  -6  -3    1.38    0.41
  -4  -6  -3    1.36    0.36
   4  -6   3    1.51    0.28
   4   6  -3    1.23    0.44
   4  -6   3    1.31    0.26
  -4  -6   3    0.83    0.57
   4  -6  -3    1.67    0.46
  -4  -6   3    1.13    0.41
   4   6   3    1.26    0.45
   4  -6  -3    1.38    0.41
  -6  -6  -3   64.97    2.48
   6  -6   3   60.19    2.32
   6  -6   3   58.66    2.31
  -6   6   3   61.76    2.41
   6   6  -3   61.99    2.51
   6   6   3   68.25    2.52
  -6  -6   3   65.28    2.70
   6  -6  -3   64.29    2.45
   6  -6  -3   67.04    2.46
   8  -6   3   10.31    0.81
  -8  -6  -3   13.16    1.17
   8   6  -3   12.09    1.07
  -8   6   3   10.67    0.88
   8  -6   3   11.54    0.96
  -8  -6  -3   12.53    0.97
   8   6   3   12.38    1.02
  -8  -6   3   10.97    1.14
   8  -6  -3   10.98    0.91
   8  -6  -3   13.55    1.08
   8  -6  -3   12.07    1.11
  -8   6  -3   13.26    0.88
  -8   6  -3   10.42    1.04
 -10  -6  -3   41.86    2.18
  10  -6   3   37.02    1.92
  10   6  -3   39.60    2.15
 -10  -6  -3   37.91    2.04
 -10   6   3   36.92    1.91
  10  -6   3   36.16    1.82
 -10   6  -3   36.69    2.32
 -10   6  -3   38.35    1.74
  10  -6  -3   40.16    2.08
 -10  -6   3   41.54    2.32
  10   6   3   39.20    2.10
  12  -6   3   36.60    2.02
  12  -6   3   36.75    2.15
  12   6  -3   41.98    2.44
 -12   6   3   40.01    2.16
 -12  -6  -3   39.80    2.38
 -12  -6  -3   40.32    2.29
 -12   6  -3   38.73    1.90
  12  -6  -3   37.70    2.34
 -12  -6   3   42.23    2.52
 -12   6  -3   38.70    2.64
  12   6   3   39.49    2.40
 -14   6   3   13.88    1.38
 -14  -6  -3   18.40    1.68
  14  -6   3   14.78    1.50
  14   6  -3   14.92    1.70
  14  -6  -3   13.99    1.69
 -14   6  -3   14.29    1.83
 -14  -6   3   16.71    1.65
  14   6   3   15.09    1.56
  16  -6   3   10.08    1.51
  16   6  -3   11.14    1.78
 -16  -6  -3    9.72    1.49
  16  -6  -3   10.25    1.69
  16   6   3    8.80    1.58
 -16   6  -3    7.82    1.66
 -16  -6   3   10.73    1.69
  18   6  -3    3.28    1.60
  18  -6   3    6.93    1.64
 -18  -6   3    5.03    1.58
  18   6   3    4.41    1.79
  18  -6  -3    3.44    1.76
   1  -7   3  185.24    6.42
   1   7  -3  188.74    6.45
  -1  -7  -3  205.41    6.56
  -1  -7  -3  191.51    6.54
  -1   7   3  187.85    6.53
   1  -7  -3  189.73    6.53
   1  -7  -3  201.11    6.55
  -1  -7   3  187.89    6.53
   1   7   3  189.55    6.39
  -1   7  -3  189.25    6.38
  -1  -7   3  191.06    6.40
  -1  -7   3  191.77    6.48
  -3  -7  -3  109.88    3.77
   3   7  -3  107.22    3.85
  -3   7   3  109.51    3.87
  -3  -7  -3  110.73    3.90
  -3  -7   3  111.13    4.00
   3  -7  -3  107.74    3.87
   3   7   3  106.47    3.90
  -3  -7   3  113.46    3.90
   3  -7  -3  116.57    3.89
  -5   7   3  121.29    4.37
  -5  -7  -3  124.36    4.43
   5   7  -3  125.99    4.43
  -5  -7  -3  123.14    4.28
  -5  -7   3  128.91    4.59
   5  -7  -3  123.37    4.39
   5   7   3  119.18    4.44
   5  -7  -3  130.48    4.41
  -7  -7  -3    6.07    0.69
   7  -7   3    4.91    0.55
   7   7  -3    4.92    0.74
  -7   7   3    5.06    0.60
   7  -7   3    4.96    0.55
  -7  -7  -3    5.00    0.70
   7  -7  -3    4.57    0.66
  -7  -7   3    5.22    0.91
   7  -7  -3    5.26    0.64
   7   7   3    6.01    0.81
  -7   7  -3    4.78    0.76
  -9  -7  -3   36.30    1.92
  -9  -7  -3   34.99    1.86
  -9   7   3   33.03    1.67
   9   7  -3   36.41    1.95
   9  -7   3   30.89    1.61
   9  -7   3   33.84    1.71
   9   7   3   34.61    1.94
  -9  -7   3   36.54    2.16
  -9   7  -3   34.67    1.47
   9  -7  -3   36.43    1.84
  -9   7  -3   35.08    2.14
  11  -7   3    4.76    0.87
 -11  -7  -3    4.63    0.97
 -11  -7  -3    5.88    0.98
 -11   7   3    5.73    0.86
  11  -7   3    3.79    0.76
  11   7  -3    3.95    0.99
 -11  -7   3    5.81    1.18
  11  -7  -3    5.72    1.00
 -11   7  -3    4.59    0.68
 -11   7  -3    5.94    1.26
  11   7   3    4.51    1.10
 -13  -7  -3    9.97    1.29
 -13  -7  -3   11.50    1.36
  13  -7   3    9.01    1.22
  13   7  -3   11.57    1.55
 -13   7   3   10.38    1.21
 -13   7  -3   10.75    1.53
  13  -7  -3   11.34    1.42
 -13  -7   3   11.97    1.52
  13   7   3   11.58    1.43
  15   7  -3    4.22    1.34
 -15  -7  -3    3.87    1.28
  15  -7   3    6.35    1.29
 -15   7  -3    2.42    1.42
 -15  -7   3    2.75    1.30
  15   7   3    4.03    1.33
  15  -7  -3    5.31    1.47
  17   7  -3   19.03    2.18
  17  -7   3   18.08    1.86
 -17  -7   3   16.91    1.93
  17  -7  -3   17.91    2.14
  17   7   3   19.34    2.07
  19   7  -3    5.73    1.88
  19  -7   3    6.47    1.83
  19  -7  -3    2.83    1.89
  19   7   3    4.57    1.91
   0   8   3  197.34    6.49
   0  -8   3  194.51    6.47
   0  -8   3  191.26    6.52
   0  -8   3  187.88    6.56
   0   8  -3  191.00    6.47
   0   8   3  193.98    6.61
   0  -8  -3  198.57    6.62
  -2   8   3   63.44    2.35
  -2  -8  -3   67.88    2.30
  -2  -8  -3   63.69    2.37
   2   8  -3   62.87    2.27
   2  -8  -3   65.56    2.36
  -2   8  -3   62.21    2.27
   2   8   3   62.15    2.29
  -2  -8   3   62.23    2.33
  -2  -8   3   59.43    2.45
   2  -8  -3   63.12    2.35
   2   8   3   62.31    2.38
   4   8  -3    5.38    0.54
  -4   8   3    5.36    0.53
  -4  -8  -3    4.45    0.57
  -4  -8  -3    5.45    0.54
   4  -8  -3    4.96    0.54
   4   8   3    5.23    0.61
  -4  -8   3    5.55    0.65
   4  -8  -3    5.46    0.58
  -4  -8   3    6.50    0.83
   6  -8   3   41.25    1.66
  -6   8   3   42.39    1.77
   6   8  -3   45.73    1.92
  -6  -8  -3   44.97    1.77
   6  -8   3   39.49    1.64
  -6  -8  -3   45.27    1.91
   6  -8  -3   45.83    1.84
  -6   8  -3   40.95    2.18
   6  -8  -3   44.14    1.85
   6   8   3   41.47    1.93
  -6  -8   3   42.86    2.14
   8  -8   3   48.25    2.05
   8   8  -3   48.31    2.28
   8  -8   3   46.97    2.02
  -8  -8  -3   51.70    2.34
  -8  -8  -3   51.05    2.24
  -8   8   3   48.91    2.07
  -8  -8   3   54.60    2.51
  -8   8  -3   47.23    2.53
   8  -8  -3   51.23    2.14
   8   8   3   50.17    2.31
   8  -8  -3   50.15    2.16
 -10   8   3   10.96    0.97
  10  -8   3   10.09    0.97
 -10  -8  -3   12.50    1.14
  10   8  -3   11.30    1.18
 -10  -8  -3   10.94    1.12
  10  -8   3    8.97    0.89
 -10  -8   3    9.05    1.20
  10   8   3    9.06    1.06
  10  -8  -3   11.21    1.06
 -10   8  -3   13.49    1.40
 -12  -8  -3   12.43    1.34
  12  -8   3   11.00    1.07
  12   8  -3   12.24    1.41
 -12   8   3   11.08    1.12
  12  -8   3    9.25    1.11
 -12  -8  -3   13.10    1.30
  12   8   3   12.92    1.60
 -12  -8   3   10.63    1.41
 -12   8  -3   11.38    1.51
  12  -8  -3   10.62    1.29
 -14  -8  -3   30.85    2.38
  14   8  -3   29.64    2.10
  14  -8   3   28.51    2.21
  14   8   3   31.57    2.55
 -14   8  -3   29.96    2.71
 -14  -8   3   30.90    2.50
  14  -8  -3   25.21    2.02
  16  -8   3   49.74    2.94
 -16  -8  -3   52.70    3.11
  16   8  -3   53.42    3.33
  16   8   3   47.97    3.30
 -16  -8   3   50.24    3.25
  16  -8  -3   44.45    3.25
 -16   8  -3   48.01    3.58
  18  -8   3   15.50    1.87
  18   8  -3   12.67    1.98
  18  -8  -3   15.19    2.29
  18   8   3   13.90    2.14
 -18  -8   3   13.59    2.02
   1   9  -3   94.92    3.43
  -1  -9  -3   97.81    3.51
   1   9  -3   97.05    3.38
  -1  -9  -3  104.48    3.53
  -1   9   3  100.09    3.50
   1  -9  -3  103.47    3.52
   1  -9  -3  101.36    3.51
  -1  -9   3   92.87    3.53
   1   9   3   98.80    3.43
  -1  -9   3   95.53    3.45
   1   9   3   98.94    3.52
  -1   9  -3   98.00    3.42
  -3   9   3   63.26    2.39
  -3  -9  -3   63.93    2.44
  -3  -9  -3   64.20    2.34
   3   9  -3   63.29    2.35
  -3  -9   3   60.29    2.56
   3   9   3   61.25    2.45
   3   9   3   63.98    2.36
   3  -9  -3   68.11    2.41
   3  -9  -3   62.62    2.39
  -3  -9   3   65.80    2.45
  -3  -9   3   64.31    2.38
   5   9  -3   64.01    2.53
  -5  -9  -3   66.36    2.42
  -5   9   3   63.77    2.44
  -5  -9  -3   62.36    2.56
   5   9   3   64.57    2.59
  -5  -9   3   64.51    2.75
   5  -9  -3   60.81    2.47
   5  -9  -3   68.72    2.51
  -5  -9   3   70.13    2.62
  -7  -9  -3    7.33    0.80
  -7  -9  -3    9.73    0.80
   7   9  -3    7.98    0.86
   7  -9   3    7.51    0.64
  -7  -9  -3    8.62    0.77
   7  -9   3    7.82    0.63
  -7   9   3    7.85    0.70
   7  -9  -3    6.74    0.77
   7  -9  -3    8.21    0.99
   7  -9  -3    9.01    0.78
   7   9   3    7.56    0.84
  -7   9  -3    6.85    0.89
  -7  -9   3    8.93    1.04
   9  -9   3    1.33    0.61
  -9   9   3    3.46    0.65
   9  -9   3    2.86    0.65
   9   9  -3    3.08    0.82
  -9  -9  -3    3.45    0.76
  -9  -9  -3    3.24    0.82
  -9   9  -3    1.58    0.85
   9  -9  -3    2.12    0.72
   9   9   3    2.72    0.88
   9  -9  -3    4.09    0.72
  -9  -9   3    4.36    1.03
 -11  -9  -3   12.11    1.32
  11   9  -3   10.87    1.30
 -11   9   3   11.42    1.03
 -11  -9  -3   12.89    1.21
  11  -9   3    9.93    0.98
  11  -9   3   12.15    1.07
 -11  -9   3   12.05    1.42
  11   9   3   13.21    1.45
 -11   9  -3    8.50    1.33
  11  -9  -3   10.27    1.17
 -13  -9  -3   30.88    2.33
  13   9  -3   31.20    2.41
  13  -9   3   29.75    2.12
  13  -9  -3   31.31    2.33
  13   9   3   34.34    2.55
 -13   9  -3   29.86    2.63
 -13  -9   3   37.39    2.62
 -15  -9  -3   24.52    2.08
  15  -9   3   27.76    2.24
  15   9  -3   24.20    2.09
 -15  -9   3   23.47    2.01
  15  -9  -3   26.59    2.19
  15   9   3   25.72    2.16
 -15   9  -3   24.51    2.29
  17   9  -3   21.51    2.14
  17  -9   3   20.38    1.95
 -17  -9   3   17.26    1.98
  17  -9  -3   14.17    2.02
  17   9   3   14.65    1.92
   0  10  -3    3.84    0.50
   0 -10   3    3.64    0.54
   0 -10   3    3.51    0.41
   0 -10  -3    4.99    0.55
   0 -10  -3    2.65    0.44
   0  10   3    3.39    0.47
   0  10   3    4.19    0.49
  -2 -10  -3  197.17    6.32
  -2 -10  -3  191.90    6.44
  -2  10   3  187.47    6.39
   2  10  -3  180.44    6.32
   2  10   3  186.58    6.30
  -2 -10   3  180.78    6.31
   2 -10  -3  184.48    6.40
  -2  10  -3  181.11    6.28
  -2 -10   3  195.15    6.43
  -2 -10   3  173.03    6.47
   2 -10  -3  195.64    6.42
   2  10   3  183.39    6.44
   4  10  -3   38.01    1.63
  -4 -10  -3   37.54    1.70
  -4  10   3   37.43    1.59
  -4 -10  -3   38.98    1.59
  -4 -10   3   36.52    1.88
   4 -10  -3   38.09    1.62
   4 -10  -3   36.66    1.62
  -4 -10   3   40.48    1.77
  -4 -10   3   39.10    1.64
   4  10   3   38.06    1.73
  -6 -10  -3   47.23    2.06
  -6 -10  -3   47.50    1.91
  -6  10   3   44.20    1.88
  -6 -10  -3   48.84    2.04
   6  10  -3   48.19    2.04
  -6 -10   3   49.29    2.32
   6  10   3   45.88    2.10
   6 -10  -3   47.82    1.96
  -6  10  -3   42.91    2.33
   6 -10  -3   42.93    2.36
   6 -10  -3   45.81    1.96
  -8  10   3   46.16    1.98
  -8 -10  -3   48.20    2.04
   8 -10   3   43.42    1.95
   8 -10   3   43.62    1.92
   8  10  -3   48.05    2.26
  -8 -10  -3   48.02    2.21
  -8 -10  -3   50.77    2.25
   8 -10  -3   47.98    2.13
   8  10   3   49.63    2.31
  -8 -10   3   49.85    2.52
  -8  10  -3   41.67    2.51
   8 -10  -3   47.64    2.07
 -10 -10  -3   28.94    1.77
 -10  10   3   25.17    1.49
  10  10  -3   26.07    1.96
  10 -10   3   23.45    1.50
  10 -10   3   27.14    1.58
 -10 -10  -3   29.12    1.91
 -10  10  -3   23.61    2.10
 -10 -10   3   30.70    2.15
  10 -10  -3   26.41    1.74
  10  10   3   27.78    2.01
  10 -10  -3   26.55    1.65
  12  10  -3    6.00    1.27
 -12  10   3    5.51    0.89
  12 -10   3    6.38    1.03
 -12 -10  -3    6.29    1.23
  12 -10  -3    5.28    1.12
  12  10   3    5.09    1.29
 -12 -10   3    8.86    1.35
 -12  10  -3    7.75    1.45
  14  10  -3    0.68    1.23
  14 -10   3    0.48    1.03
 -14 -10  -3   -0.07    1.14
  14  10   3    1.09    1.22
 -14 -10   3    0.54    1.22
  14 -10  -3   -1.38    1.12
 -14  10  -3   -0.75    1.28
  16  10  -3   16.27    1.90
 -16 -10  -3   16.61    1.97
  16 -10   3   17.96    1.75
 -16  10  -3   13.73    2.17
  16  10   3   15.79    2.03
  16 -10  -3   15.74    1.89
 -16 -10   3   15.44    1.80
  18  10  -3    0.26    1.64
  18 -10   3    2.10    1.60
  18 -10  -3   -0.87    1.73
  18  10   3    1.26    1.74
 -18 -10   3    0.96    1.60
   1  11  -3   16.45    0.98
  -1  11   3   14.96    0.95
  -1  11   3   15.77    0.93
   1  11  -3   14.42    0.70
  -1 -11  -3   15.21    0.99
  -1 -11  -3   15.64    0.98
   1 -11  -3   15.56    0.94
  -1  11  -3   13.87    0.92
  -1 -11   3   13.03    0.92
  -1 -11   3   12.46    0.92
   1 -11  -3   12.50    0.94
   1  11   3   15.21    0.99
   1  11   3   13.54    0.94
  -1 -11   3   11.16    0.91
  -3 -11  -3   26.43    1.24
  -3  11   3   25.87    1.21
   3  11  -3   23.70    1.17
  -3 -11  -3   26.68    1.35
   3  11   3   25.18    1.28
   3 -11  -3   23.54    1.25
  -3 -11   3   25.44    1.27
   3  11   3   23.92    1.33
   3 -11  -3   28.51    1.28
  -3  11  -3   24.75    1.21
  -3 -11   3   26.58    1.53
  -3 -11   3   25.42    1.36
  -5 -11  -3   42.66    1.96
   5  11  -3   43.59    1.87
  -5 -11  -3   44.18    1.80
  -5  11   3   43.60    1.79
   5 -11  -3   42.62    1.84
   5 -11  -3   47.22    1.84
  -5 -11   3   46.26    2.18
   5  11   3   43.07    1.98
  -5 -11   3   44.03    2.03
   5 -11  -3   39.37    2.19
  -5 -11   3   41.49    1.84
  -7  11   3   57.92    2.32
  -7 -11  -3   63.04    2.57
   7  11  -3   58.88    2.54
  -7 -11  -3   61.32    2.58
  -7 -11  -3   60.11    2.37
  -7  11  -3   55.39    2.90
   7  11   3   60.83    2.61
  -7 -11   3   56.78    2.77
   7 -11  -3   56.47    2.43
   7 -11  -3   62.93    2.43
   9  11  -3   10.35    1.13
   9 -11   3   10.93    0.87
  -9 -11  -3   12.70    1.05
  -9  11   3   12.44    0.94
   9 -11   3   11.63    0.90
  -9 -11  -3    8.85    1.03
  -9 -11   3   10.86    1.30
  -9  11  -3   11.99    1.40
   9  11   3   10.77    1.19
   9 -11  -3   11.16    1.00
   9 -11  -3   11.40    1.07
 -11  11   3   66.24    2.78
  11 -11   3   65.27    2.87
  11  11  -3   67.27    3.22
  11 -11   3   62.19    2.78
 -11 -11  -3   70.95    3.18
  11  11  -3   71.29    3.21
 -11  11  -3   68.26    3.67
  11 -11  -3   70.64    3.04
 -11 -11   3   71.17    3.39
  11  11   3   70.07    3.33
 -13 -11  -3   54.28    3.02
  13 -11   3   53.57    2.70
  13  11  -3   57.47    3.05
 -13  11  -3   48.57    3.38
  13  11   3   54.53    3.18
 -13 -11   3   60.22    3.24
  13 -11  -3   50.86    2.88
 -15 -11  -3    3.02    1.39
  15 -11   3    2.44    1.21
  15  11  -3    4.04    1.40
 -15 -11   3    3.82    1.41
 -15  11  -3    5.79    1.61
  15 -11  -3    1.17    1.32
  15  11   3    0.12    1.31
 -17 -11  -3   -0.99    1.39
  17 -11   3    0.70    1.43
  17  11  -3    1.96    1.63
  17 -11  -3   -0.36    1.64
  17  11   3    2.57    1.57
 -17 -11   3    0.97    1.52
   0 -12  -3   26.67    1.28
   0 -12   3   22.09    1.25
   0 -12   3   23.67    1.18
   0  12   3   24.59    1.27
   0  12  -3   27.32    1.26
   0 -12  -3   26.22    1.27
   0  12   3   23.47    1.24
   0 -12   3   24.54    1.22
   2  12  -3   49.59    1.89
  -2  12   3   50.86    2.01
  -2 -12  -3   51.82    2.09
  -2 -12   3   54.21    2.04
   2  12   3   49.37    2.07
  -2  12  -3   50.44    1.98
  -2 -12   3   48.62    2.09
   2  12   3   52.98    2.04
   2 -12  -3   53.38    2.04
   2 -12  -3   48.78    2.02
  -2 -12   3   48.57    2.19
   4  12  -3   -0.15    0.44
  -4 -12  -3    0.17    0.46
  -4 -12  -3    0.15    0.57
  -4  12   3    0.62    0.42
  -4 -12   3   -0.18    0.47
   4 -12  -3    0.87    0.50
  -4 -12   3   -0.63    0.70
  -4 -12   3    1.17    0.61
   4 -12  -3    0.35    0.59
   4  12   3   -0.03    0.52
   4 -12  -3    0.58    0.49
   6  12  -3   31.65    1.68
  -6 -12  -3   32.32    1.56
  -6  12   3   34.00    1.51
  -6 -12  -3   34.83    1.74
   6 -12  -3   35.95    1.60
  -6  12  -3   29.56    1.97
  -6 -12   3   32.66    2.00
   6  12   3   33.41    1.79
   6 -12  -3   32.54    1.99
   6 -12  -3   30.52    1.58
  -8 -12  -3   93.82    3.77
   8  12  -3   94.58    3.66
  -8  12   3   86.67    3.36
  -8 -12  -3   95.59    3.64
   8  12   3   96.28    3.72
  -8 -12   3   91.84    3.85
   8 -12  -3   92.28    3.47
   8 -12  -3   86.13    3.49
  -8  12  -3   81.44    4.12
  10  12  -3   19.83    1.56
  10 -12   3   18.29    1.37
 -10 -12  -3   23.10    1.87
  10  12  -3   20.93    1.53
  10 -12   3   20.53    1.47
 -10  12   3   20.68    1.36
 -10  12  -3   19.45    1.73
  10 -12  -3   20.61    1.73
  10  12   3   19.14    1.67
  10 -12  -3   19.29    1.50
 -10 -12   3   21.18    1.73
  12 -12   3   34.06    2.10
  12  12  -3   38.18    2.50
 -12 -12  -3   40.69    2.46
 -12 -12   3   34.09    2.62
  12  12   3   36.88    2.63
  12 -12  -3   34.14    2.29
 -12  12  -3   29.85    2.73
  14 -12   3    1.43    1.11
  14  12  -3    1.36    1.19
 -14 -12  -3   -0.78    1.13
  14 -12  -3    1.24    1.22
  14  12   3    1.49    1.34
 -14  12  -3    1.61    1.42
 -14 -12   3    0.40    1.25
  16  12  -3   13.02    1.86
  16 -12   3   13.78    1.67
 -16 -12  -3   11.37    1.83
  16 -12  -3   12.42    1.95
 -16 -12   3   11.40    1.86
  16  12   3   10.93    1.81
  18 -12   3   12.03    1.88
  18  12  -3   12.49    1.95
 -18 -12   3    8.52    1.76
  18  12   3   14.88    2.29
  18 -12  -3    8.55    2.12
  -1 -13  -3   48.03    1.94
  -1 -13  -3   50.22    1.96
  -1  13   3   44.04    1.91
   1  13  -3   47.62    1.94
  -1  13   3   47.52    1.89
  -1 -13   3   46.50    1.89
   1 -13  -3   48.18    1.91
   1 -13  -3   43.98    1.90
   1  13   3   44.58    1.90
  -1  13  -3   44.06    1.87
  -1 -13   3   42.22    1.97
   1  13   3   46.32    1.93
  -1 -13   3   44.83    1.93
  -3  13   3    2.75    0.51
  -3 -13  -3    3.23    0.63
  -3 -13  -3    2.42    0.53
   3  13  -3    1.76    0.44
   3  13   3    2.36    0.60
   3 -13  -3    2.24    0.54
   3  13   3    2.90    0.60
  -3 -13   3    2.10    0.75
  -3 -13   3    1.81    0.66
   3 -13  -3    3.08    0.57
   3 -13  -3    1.38    0.62
  -3 -13   3    2.48    0.57
  -3  13  -3    2.48    0.50
  -5  13   3   19.48    1.14
   5  13  -3   21.43    1.28
  -5 -13  -3   20.94    1.42
  -5 -13  -3   19.91    1.21
   5 -13  -3   23.19    1.23
  -5 -13   3   23.22    1.51
   5 -13  -3   20.61    1.57
   5  13   3   21.73    1.46
   5 -13  -3   19.38    1.23
  -5  13  -3   18.97    1.56
  -5 -13   3   22.75    1.68
  -7  13   3   77.85    2.95
   7  13  -3   81.62    3.19
  -7 -13  -3   78.98    3.20
  -7 -13   3   81.25    3.42
  -7  13  -3   73.27    3.66
   7  13   3   77.83    3.26
   7 -13  -3   77.24    3.04
   7 -13  -3   78.38    3.04
  -9 -13  -3   15.37    1.36
   9  13  -3   14.28    1.34
   9 -13   3   14.19    0.97
  -9  13   3   14.04    1.17
  -9 -13   3   14.78    1.50
   9  13   3   14.32    1.37
   9 -13  -3   14.98    1.18
  -9  13  -3   15.66    1.64
   9 -13  -3   14.88    1.12
  11  13  -3   58.92    2.81
  11  13  -3   55.46    2.95
  11 -13   3   58.30    2.58
 -11 -13  -3   58.67    2.93
  11 -13   3   49.85    2.46
  11  13   3   59.50    3.12
 -11  13  -3   54.90    3.41
  11 -13  -3   61.54    2.82
 -11 -13   3   62.39    3.21
  13 -13   3   27.11    2.04
 -13 -13  -3   25.86    1.97
  13  13  -3   26.77    2.01
 -13 -13   3   23.79    2.04
  13 -13  -3   28.39    2.26
  13  13   3   27.61    2.07
 -13  13  -3   25.47    2.28
 -15 -13  -3   15.18    1.93
  15  13  -3   15.69    1.94
  15 -13   3   17.03    1.65
  15 -13  -3   12.65    1.79
 -15 -13   3   13.58    1.98
  15  13   3   12.68    1.76
 -15  13  -3   12.28    2.02
  17  13  -3    9.07    1.73
 -17 -13  -3    8.24    1.94
  17 -13   3    9.04    1.71
 -17 -13   3    9.48    1.70
  17  13   3    6.67    1.92
  17 -13  -3    6.56    1.89
   0  14   3   12.74    0.97
   0 -14  -3   11.83    0.98
   0 -14   3    9.34    0.79
   0  14  -3   11.39    0.88
   0 -14   3    9.61    0.80
   0  14   3   10.67    0.85
   0 -14  -3   12.35    0.97
  -2  14   3    9.02    0.73
   2  14  -3    9.22    0.68
  -2 -14  -3    7.81    0.79
   2  14   3    7.98    0.80
   2 -14  -3    8.31    0.73
  -2 -14   3    7.38    0.81
  -2 -14   3    7.78    0.76
  -2 -14   3    8.27    0.88
   2  14   3    7.47    0.77
  -2  14  -3    7.88    0.72
   2 -14  -3    9.08    0.75
  -4 -14  -3   34.25    1.57
  -4 -14  -3   35.85    1.73
  -4  14   3   33.46    1.50
   4  14  -3   31.71    1.52
   4 -14  -3   32.82    1.57
  -4 -14   3   30.59    1.76
  -4  14  -3   31.39    1.86
   4 -14  -3   33.60    1.56
   4  14   3   32.53    1.62
  -4 -14   3   32.88    1.90
  -4  14  -3   31.16    1.53
   4  14   3   35.72    1.74
   4 -14  -3   30.30    1.89
  -6 -14  -3   65.43    2.78
   6  14  -3   63.72    2.70
  -6  14   3   65.33    2.53
  -6 -14   3   70.19    3.03
  -6  14  -3   61.96    3.17
   6  14   3   69.16    2.85
   6 -14  -3   70.64    2.63
   6 -14  -3   63.39    3.17
   6 -14  -3   62.85    2.60
   8  14  -3   65.85    2.92
  -8 -14  -3   67.06    2.92
  -8  14   3   64.63    2.59
  -8  14  -3   63.45    3.38
   8  14   3   68.42    3.02
  -8 -14   3   73.09    3.20
   8 -14  -3   61.95    2.73
   8 -14  -3   62.11    2.71
 -10 -14  -3   41.11    2.40
  10 -14   3   36.65    1.86
  10  14  -3   38.27    2.40
  10  14  -3   39.17    2.13
  10  14   3   39.59    2.52
  10 -14  -3   39.74    2.21
 -10  14  -3   39.49    2.82
 -10 -14   3   44.90    2.72
  12 -14   3   71.31    3.18
  12  14  -3   75.53    3.50
 -12 -14  -3   75.52    3.63
  12  14  -3   78.65    3.62
 -12 -14   3   79.12    3.80
  12  14   3   76.17    3.75
 -12  14  -3   68.17    4.09
  12 -14  -3   74.75    3.47
  14  14  -3    8.63    1.43
  14 -14   3    9.01    1.33
 -14 -14  -3    7.97    1.50
 -14 -14   3    7.88    1.62
  14 -14  -3    7.69    1.49
  14  14   3   11.12    1.69
 -14  14  -3    6.18    1.76
  16 -14   3    3.02    1.44
 -16 -14  -3   -0.13    1.45
  16  14  -3    2.92    1.54
  16  14   3    3.49    1.64
 -16 -14   3    3.51    1.55
  16 -14  -3   -0.35    1.60
   1 -15   3    1.68    0.49
  -1 -15  -3    3.52    0.64
  -1 -15  -3    2.48    0.61
  -1  15   3    2.01    0.53
  -1  15   3    1.68    0.57
   1  15  -3    2.81    0.67
   1 -15   3    2.58    0.55
   1  15   3    2.11    0.56
   1  15   3    1.78    0.61
   1 -15  -3    2.64    0.62
  -1 -15   3    2.55    0.68
   1 -15  -3    1.61    0.58
  -1 -15   3    1.50    0.59
  -1 -15   3    2.57    0.59
  -1  15  -3    1.70    0.58
   1 -15  -3    2.63    0.59
  -3 -15  -3    8.42    0.88
   3  15  -3    6.71    0.61
  -3  15   3    8.31    0.70
  -3 -15  -3    6.98    0.81
   3  15   3    7.68    0.84
   3  15   3    7.89    0.86
   3 -15  -3    7.60    0.92
   3 -15  -3    6.83    0.74
  -3 -15   3    6.34    0.86
   3 -15  -3    7.16    0.73
  -3 -15   3    7.70    0.96
  -3  15  -3    7.85    0.74
  -5 -15  -3   30.16    1.72
  -5  15   3   29.43    1.43
   5  15  -3   28.49    1.54
  -5 -15   3   31.62    1.99
   5 -15  -3   29.23    1.94
   5  15   3   31.09    1.80
   5 -15  -3   32.12    1.52
  -5  15  -3   28.05    1.89
  -5 -15   3   28.38    1.81
   5 -15  -3   26.93    1.50
  -7  15   3  156.10    5.60
  -7 -15  -3  156.63    5.86
   7  15  -3  161.05    5.83
   7 -15  -3  167.88    5.73
  -7 -15   3  163.15    6.05
   7 -15  -3  158.22    5.71
  -7  15  -3  148.68    6.72
   7  15   3  171.47    5.97
  -9 -15  -3  117.71    4.59
   9  15  -3  115.66    4.57
  -9 -15   3  122.48    4.82
  -9  15  -3  105.59    5.25
   9  15   3  123.24    4.69
   9 -15  -3  109.82    4.37
  11  15  -3   65.32    3.08
  11 -15   3   64.69    2.79
  11 -15   3   59.43    2.71
  11  15  -3   67.52    3.27
 -11 -15   3   69.50    3.48
  11 -15  -3   67.81    3.07
 -11  15  -3   62.43    3.80
  11  15   3   68.99    3.44
 -13 -15  -3    9.47    1.52
  13  15  -3   11.76    1.49
  13 -15   3    9.85    1.30
  13 -15  -3   11.20    1.53
 -13  15  -3   13.27    1.94
  13  15   3   13.02    1.76
 -13 -15   3    9.08    1.55
  15 -15   3    4.37    1.35
  15  15  -3    2.27    1.45
 -15 -15  -3    2.72    1.58
 -15 -15   3    2.92    1.62
 -15  15  -3    1.55    1.77
  15  15   3    3.80    1.62
  15 -15  -3    0.77    1.54
  17  15  -3    1.60    1.55
 -17 -15  -3    0.97    1.67
  17 -15   3    0.46    1.53
  17  15   3   -0.68    1.77
  17 -15  -3   -2.45    1.79
 -17 -15   3    0.77    1.52
   0 -16  -3    0.19    0.53
   0  16  -3    1.04    0.66
   0  16   3    0.31    0.53
   0  16   3    1.04    0.59
   0 -16   3    0.41    0.60
   0 -16  -3    1.13    0.55
   0 -16   3   -0.66    0.50
   0 -16  -3    1.29    0.53
   2  16  -3   10.48    0.74
   2  16  -3   10.14    0.94
  -2  16   3    9.49    0.92
  -2  16   3    9.30    0.78
  -2 -16  -3   10.03    0.92
  -2 -16   3    8.13    0.95
  -2 -16   3    9.05    0.90
   2  16   3    8.40    0.85
   2 -16  -3    9.25    0.83
  -2  16  -3    8.71    0.81
   2 -16  -3    9.44    0.94
   2  16   3    8.11    0.86
   2 -16  -3    9.72    0.85
  -4  16   3   -0.24    0.50
  -4 -16  -3   -0.02    0.63
   4  16  -3    0.23    0.52
  -4  16  -3   -0.56    0.68
   4 -16  -3    1.05    0.74
   4 -16  -3    0.02    0.54
  -4 -16   3    0.34    0.85
   4 -16  -3    0.21    0.61
   4  16   3    0.02    0.64
  -4 -16   3   -0.01    0.71
  -4  16  -3   -0.11    0.54
   4  16   3    1.21    0.73
  -6  16   3   56.47    2.32
   6  16  -3   56.99    2.51
  -6 -16  -3   56.73    2.64
   6  16   3   61.65    2.73
   6 -16  -3   60.38    2.43
  -6 -16   3   60.65    2.88
   6 -16  -3   56.70    2.41
  -6  16  -3   58.47    3.05
  -8  16   3  110.97    4.17
  -8 -16  -3  117.95    4.52
   8  16  -3  115.24    4.47
  -8  16  -3  112.95    5.25
  -8 -16   3  120.17    4.75
   8  16   3  120.77    4.61
   8 -16  -3  112.60    4.30
   8 -16  -3  111.56    4.32
  10  16  -3   51.83    2.59
  10  16  -3   57.56    2.90
 -10  16  -3   54.35    3.40
  10  16   3   53.65    3.06
  10 -16  -3   52.95    2.60
 -10 -16   3   56.48    3.14
  12  16  -3   14.52    1.70
 -12 -16  -3   14.34    1.73
  12 -16   3   13.96    1.30
 -12 -16   3   15.31    1.89
  12 -16  -3   14.71    1.53
 -12  16  -3   17.14    2.08
  12  16   3   15.67    1.83
  14 -16   3    0.59    1.18
 -14 -16  -3    2.24    1.39
  14  16  -3    2.24    1.42
 -14 -16   3    2.14    1.44
 -14  16  -3    1.62    1.66
  14  16   3    2.67    1.46
  14 -16  -3   -0.99    1.39
 -16 -16  -3   -0.49    1.46
  16 -16   3    1.38    1.49
  16  16  -3    0.35    1.57
  16  16   3   -0.34    1.52
 -16 -16   3    3.12    1.67
  16 -16  -3   -0.60    1.73
  -1 -17  -3    8.83    0.88
   1  17  -3    6.66    0.89
  -1 -17  -3    6.49    0.83
   1 -17   3    7.45    0.67
  -1  17   3    6.02    0.84
  -1  17   3    5.64    0.70
  -1 -17   3    7.32    0.81
   1  17   3    5.49    0.76
   1  17   3    6.63    0.82
  -1  17  -3    5.29    0.75
   1 -17  -3    7.45    0.83
  -1 -17   3    4.62    0.82
   1 -17  -3    5.47    0.76
   3  17  -3   10.69    0.91
  -3  17   3   11.21    0.86
  -3 -17  -3   10.70    1.00
  -3  17   3   12.79    1.04
   3  17   3   11.06    1.01
   3 -17  -3   10.83    0.92
  -3 -17   3   10.99    1.06
   3 -17  -3   12.82    0.95
  -3  17  -3   11.57    0.95
   3  17   3   10.36    1.02
  -3 -17   3   11.77    1.17
  -3  17  -3   12.06    1.16
   3 -17  -3   13.23    1.17
  -5 -17  -3    8.59    1.03
  -5  17   3    9.05    0.79
   5  17  -3    7.66    0.84
  -5  17  -3    8.94    0.90
   5 -17  -3   10.84    0.91
  -5 -17   3    6.77    1.01
  -5 -17   3    8.36    1.20
  -5  17  -3    8.80    1.19
   5  17   3    9.63    1.05
   5 -17  -3    8.20    0.85
   5 -17  -3    9.05    1.13
  -7  17   3   81.27    3.14
  -7 -17  -3   81.71    3.50
   7  17  -3   84.57    3.42
  -7 -17   3   81.14    3.72
   7 -17  -3   83.73    3.29
   7  17   3   87.31    3.61
   7 -17  -3   86.69    3.29
  -7  17  -3   81.38    4.11
   9  17  -3   17.43    1.34
   9  17  -3   12.97    1.34
  -9 -17  -3   13.50    1.33
   9  17   3   19.96    1.83
  -9  17  -3   13.22    1.72
  -9 -17   3   14.71    1.65
   9 -17  -3   13.08    1.24
  11  17  -3   47.51    2.92
 -11 -17  -3   53.28    3.03
  11 -17  -3   53.89    2.75
 -11 -17   3   56.95    3.27
 -11  17  -3   51.31    3.53
  11  17   3   58.25    3.20
  13 -17   3    0.20    1.09
  13  17  -3    1.23    1.23
 -13 -17  -3    1.39    1.29
  13 -17  -3    0.75    1.29
  13  17   3    1.68    1.47
 -13  17  -3    2.95    1.61
 -13 -17   3    1.13    1.46
  15  17  -3   11.03    1.86
  15 -17   3   11.20    1.54
 -15 -17  -3    7.85    1.66
 -15 -17   3    6.49    1.79
  15  17   3    6.81    1.70
  15 -17  -3    6.85    1.74
   0 -18   3   16.88    1.23
   0 -18  -3   16.78    1.18
   0 -18   3   16.92    1.33
   0 -18  -3   15.35    1.31
   0  18   3   14.16    1.12
   0  18   3   16.97    1.24
   0 -18  -3   17.94    1.28
   0  18  -3   16.80    1.38
  -2 -18  -3   19.45    1.52
   2  18  -3   21.11    1.57
  -2  18   3   20.52    1.28
  -2  18   3   20.80    1.47
   2  18  -3   19.64    1.02
  -2 -18   3   16.49    1.43
  -2  18  -3   20.88    1.45
   2  18   3   19.87    1.49
   2  18   3   21.18    1.52
   2 -18  -3   20.56    1.34
   2 -18  -3   22.36    1.54
   2 -18  -3   21.57    1.41
  -2 -18   3   19.44    1.57
  -2  18  -3   20.25    1.61
   4  18  -3    1.95    0.59
  -4  18   3    2.29    0.60
  -4 -18  -3    1.79    0.82
   4 -18  -3    2.77    0.68
   4  18   3    1.92    0.86
   4 -18  -3    2.14    0.72
   4  18   3    2.40    0.85
  -4  18  -3    1.15    0.91
  -4  18  -3    1.82    0.67
   4 -18  -3    2.71    0.88
  -4 -18   3    1.76    0.86
  -4 -18   3    2.32    0.97
  -6  18   3   45.09    1.94
  -6 -18  -3   43.64    2.38
   6  18  -3   43.44    2.16
   6 -18  -3   45.45    2.07
  -6 -18   3   46.14    2.63
   6  18   3   49.15    2.49
  -6  18  -3   42.75    2.76
  -6  18  -3   42.49    2.10
   6 -18  -3   45.41    2.12
  -8 -18  -3   34.46    2.19
   8  18  -3   28.73    2.03
  -8  18  -3   31.10    2.62
   8 -18  -3   30.82    1.86
  -8 -18   3   33.10    2.45
 -10 -18  -3   32.39    2.41
  10  18  -3   31.01    2.34
  10 -18  -3   28.73    2.11
 -10  18  -3   34.77    2.95
  10  18   3   36.17    2.67
 -10 -18   3   32.23    2.67
  12  18  -3   21.25    1.90
 -12 -18  -3   19.28    1.80
 -12 -18   3   22.47    2.21
 -12  18  -3   19.97    2.32
  12 -18  -3   22.72    1.77
  12  18   3   24.53    2.05
 -14 -18  -3    0.04    1.47
  14  18   3    2.45    1.46
 -14  18  -3    0.65    1.87
 -14 -18   3    1.67    1.42
  14 -18  -3    2.77    1.50
 -16 -18  -3    5.56    1.75
  16 -18   3    6.98    1.61
  16 -18  -3    3.66    1.85
  16  18   3    4.21    1.70
 -16 -18   3    4.88    1.80
  -1 -19  -3   23.46    1.58
  -1  19   3   20.00    1.37
   1 -19   3   24.42    1.40
  -1 -19  -3   23.74    1.56
   1  19  -3   25.20    1.66
  -1  19   3   23.45    1.59
   1 -19   3   22.78    1.26
   1  19   3   18.59    1.54
  -1 -19   3   23.34    1.62
   1 -19  -3   22.79    1.49
   1  19   3   22.02    1.52
  -1  19  -3   19.74    1.64
  -1 -19   3   23.00    1.48
   1 -19  -3   21.61    1.48
  -1  19  -3   22.23    1.58
  -3  19   3    7.28    0.98
  -3 -19  -3    7.29    0.99
   3  19  -3    7.22    0.69
  -3  19   3    6.12    0.75
  -3  19  -3    9.08    1.19
  -3  19  -3    6.71    0.89
   3  19   3    7.95    1.01
  -3 -19   3    6.71    1.11
   3 -19  -3    7.90    0.84
   3  19   3    8.09    1.06
  -3 -19   3    7.58    1.03
   3 -19  -3    6.92    1.02
   5  19  -3    4.32    0.79
  -5 -19  -3    5.27    1.06
   5  19   3    6.80    1.15
   5 -19  -3    5.24    0.82
  -5  19  -3    4.81    1.20
  -5 -19   3    6.33    1.21
  -5  19  -3    4.05    0.83
   5 -19  -3    3.94    0.83
  -7 -19  -3   14.90    1.41
   7  19  -3   14.97    1.27
  -7 -19   3   15.58    1.60
  -7  19  -3   15.51    1.77
   7 -19  -3   14.23    1.19
   7  19   3   16.05    1.58
  -9 -19  -3   11.91    1.52
   9  19  -3    9.53    1.26
   9 -19  -3   10.22    1.17
   9  19   3    9.55    1.44
  -9  19  -3   11.33    1.79
  -9 -19   3    9.09    1.47
 -11 -19  -3   12.17    1.56
  11 -19  -3   16.27    1.53
 -11 -19   3   14.00    1.92
  11  19   3   16.08    1.86
 -11  19  -3   12.97    1.97
 -13 -19  -3    0.54    1.49
 -13  19  -3   -0.27    1.70
 -13 -19   3    1.45    1.47
  13 -19  -3   -1.08    1.35
  13  19   3   -0.57    1.44
 -15 -19  -3    2.94    1.68
  15 -19   3    2.03    1.37
  15 -19  -3    3.30    1.71
  15  19   3    2.78    1.60
 -15 -19   3    4.45    1.89
   0 -20   3    5.21    0.86
   0 -20   3    2.82    0.69
   0  20  -3    3.36    0.82
   0 -20  -3    3.33    0.86
   0 -20  -3    4.26    0.79
   0  20   3    2.44    0.82
   0  20   3    3.04    0.78
   0  20  -3    3.91    0.86
  -2 -20  -3    2.33    0.88
  -2  20   3    4.13    0.72
   2  20  -3    4.28    1.02
  -2  20   3    2.67    0.88
  -2 -20   3    3.68    0.97
  -2  20  -3    5.23    0.93
   2  20   3    4.28    0.97
   2 -20  -3    5.01    0.82
  -2 -20   3    3.68    0.89
   2 -20  -3    3.88    0.84
  -2  20  -3    4.13    1.03
   2  20   3    3.91    0.90
   2 -20  -3    5.26    0.87
  -4  20   3    0.09    0.86
  -4 -20  -3    1.05    0.89
   4 -20  -3    0.15    0.77
  -4  20  -3    0.63    0.82
   4  20   3   -0.37    0.91
   4 -20  -3    0.12    0.82
   4  20   3   -0.29    0.86
  -4  20  -3    0.31    1.01
  -4 -20   3    0.79    1.05
  -6 -20  -3   25.82    2.00
   6 -20  -3   24.91    1.71
  -6  20  -3   27.00    2.37
  -6  20  -3   21.72    1.69
   6  20   3   25.40    2.07
  -6 -20   3   22.74    1.84
  -8 -20  -3    3.82    1.16
  -8  20  -3    7.74    1.57
  -8 -20   3    5.26    1.34
   8 -20  -3    2.98    0.99
   8  20   3    3.56    1.20
 -10 -20  -3    4.58    1.21
  10 -20  -3    4.33    1.09
 -10  20  -3    5.15    1.69
 -10 -20   3    5.55    1.61
  10  20   3    3.93    1.40
 -12 -20  -3   24.84    2.10
  12  20   3   20.46    2.08
 -12 -20   3   20.54    2.07
  12 -20  -3   26.84    1.96
 -12  20  -3   24.26    2.52
 -14 -20  -3    4.18    1.56
  14 -20  -3    7.60    1.68
  14  20   3    9.13    1.92
 -14 -20   3    6.78    1.92
  -1  21   3   26.49    1.64
   1 -21   3   25.96    1.40
   1 -21   3   26.11    1.62
  -1  21   3   27.05    1.84
  -1 -21  -3   23.95    1.78
   1  21  -3   25.71    1.72
   1  21  -3   27.11    1.90
   1  21   3   27.04    1.78
  -1  21  -3   27.97    1.98
  -1 -21   3   24.21    1.85
  -1 -21   3   25.25    1.63
   1 -21  -3   25.53    1.71
   1  21   3   26.28    1.84
  -1  21  -3   24.96    1.85
  -3 -21  -3   25.03    1.87
  -3  21   3   26.76    1.85
  -3  21  -3   22.64    2.17
   3  21   3   26.07    1.95
   3 -21  -3   27.87    1.87
  -3 -21   3   27.02    2.00
  -3  21  -3   24.84    1.78
   3 -21  -3   29.40    1.76
   3  21   3   26.50    1.94
  -5  21   3   15.38    1.37
  -5 -21  -3   15.24    1.34
  -5  21  -3   15.41    1.66
   5 -21  -3   14.32    1.22
   5  21   3   14.52    1.48
  -5 -21   3   14.78    1.56
  -5  21  -3   14.82    1.25
  -7 -21  -3    5.52    1.16
  -7  21  -3    5.51    1.48
  -7  21  -3    2.57    1.00
   7  21   3    4.93    1.35
  -7 -21   3    3.99    1.32
   7 -21  -3    3.35    0.99
  -9 -21  -3   12.16    1.53
   9  21   3   12.35    1.62
  -9 -21   3   12.96    1.71
  -9  21  -3   16.32    1.99
   9 -21  -3   12.58    1.30
 -11 -21  -3   -0.37    1.28
  11 -21  -3    0.13    1.15
 -11 -21   3   -0.70    1.44
  11  21   3    1.48    1.49
 -11  21  -3    0.14    1.63
 -13 -21  -3    1.42    1.61
 -13 -21   3    3.25    1.65
  13 -21  -3   -0.49    1.49
  13  21   3   -0.31    1.47
  15 -21  -3    3.20    1.85
   0 -22   3   15.38    1.29
   0 -22  -3   15.20    1.27
   0 -22   3   13.73    1.23
   0  22  -3   13.73    1.34
   0  22  -3   18.97    1.38
   0  22   3   14.52    1.31
  -2 -22  -3   13.75    1.23
   2  22  -3   14.22    1.36
  -2  22   3   13.79    1.30
  -2  22  -3   14.95    1.34
  -2  22  -3   13.78    1.49
   2 -22  -3   13.94    1.19
   2  22   3   13.36    1.30
  -2 -22   3   11.88    1.33
   2  22   3   12.40    1.30
  -4  22   3    8.15    1.12
  -4 -22  -3    7.93    1.15
   4  22   3    7.21    1.19
   4  22   3    6.99    1.24
   4 -22  -3    8.27    1.14
  -4 -22   3    7.07    1.28
  -4  22  -3    9.05    1.11
  -4  22  -3    8.60    1.46
   4 -22  -3    7.78    1.06
  -6 -22  -3   10.81    1.38
   6 -22  -3   10.50    1.16
  -6  22  -3    9.96    1.62
  -6  22  -3    9.42    1.17
   6  22   3    8.04    1.36
  -6 -22   3   10.05    1.50
  -8 -22  -3    1.40    1.12
  -8 -22   3    0.66    1.31
  -8  22  -3    2.04    1.04
   8  22   3    3.29    1.40
  -8  22  -3    1.52    1.45
   8 -22  -3    1.58    1.00
 -10 -22  -3    2.04    1.24
  10  22   3    1.35    1.44
 -10  22  -3    0.25    1.63
  10 -22  -3    2.55    1.13
 -10 -22   3    2.40    1.58
 -12 -22  -3   13.12    1.73
 -12 -22   3   12.22    1.83
 -12  22  -3   12.43    2.28
  12 -22  -3   12.89    1.58
 -14 -22  -3   13.52    1.98
 -14 -22   3   14.01    2.17
  14 -22  -3   21.61    2.14
   1 -23   3   29.25    1.56
  -1 -23  -3   27.90    1.96
   1  23  -3   27.32    2.08
   1 -23   3   26.73    1.81
   1  23  -3   24.19    1.92
  -1  23   3   29.58    2.03
  -1  23  -3   30.73    2.19
   1 -23  -3   31.83    1.99
  -1  23  -3   28.41    2.06
  -1 -23   3   24.43    2.01
   1  23   3   27.54    2.07
  -3 -23  -3    5.92    1.20
  -3  23   3    8.76    1.20
   3 -23  -3    7.69    1.06
  -3  23  -3    5.57    1.06
   3  23   3    5.82    1.27
  -3 -23   3    5.18    1.27
  -3  23  -3    4.18    1.36
  -5  23   3    6.11    1.16
  -5 -23  -3    6.81    1.20
  -5 -23   3    7.80    1.45
  -5  23  -3    5.27    1.05
  -5  23  -3    5.72    1.50
  -7 -23  -3    0.99    1.15
  -7  23  -3    0.79    1.44
  -7 -23   3    0.09    1.33
   7 -23  -3    2.00    0.98
  -7  23  -3    1.51    0.97
  -9 -23  -3    2.07    1.30
  -9 -23   3    3.16    1.52
   9 -23  -3    2.66    1.14
  -9  23  -3    3.47    1.12
  -9  23  -3    3.25    1.67
 -11 -23  -3   -1.36    1.28
  11 -23  -3   -0.30    1.21
 -11  23  -3   -1.65    1.79
 -11 -23   3   -1.14    1.56
 -13 -23  -3    2.87    1.61
 -13 -23   3    1.22    1.62
  13 -23  -3    2.03    1.52
   0  24   3    6.21    1.15
   0  24  -3    5.08    1.24
   0 -24  -3    6.10    1.09
   0  24  -3    2.40    1.10
   0 -24   3    4.94    1.09
  -2 -24  -3   16.85    1.48
  -2  24   3   19.92    1.62
   2  24  -3   22.79    1.75
   2  24   3   21.65    1.73
  -2 -24   3   19.68    1.63
  -2  24  -3   18.56    1.73
   2 -24  -3   23.17    1.85
  -2  24  -3   18.85    1.54
  -4  24   3    3.64    1.10
  -4 -24  -3    0.03    1.12
  -4 -24   3    2.23    1.26
   4  24   3    1.06    1.22
   4 -24  -3    1.33    0.99
  -4  24  -3    0.41    1.01
  -4  24  -3    0.62    1.36
  -6  24   3   17.14    1.54
  -6 -24  -3   12.94    1.47
  -6 -24   3   11.73    1.63
  -6  24  -3   13.99    1.43
  -6  24  -3   14.47    1.90
  -8 -24  -3   13.31    1.62
  -8 -24   3   11.25    1.75
  -8  24  -3    9.75    1.34
   8 -24  -3   12.17    1.37
  -8  24  -3   16.73    2.06
 -10 -24  -3    3.62    1.42
 -10  24  -3    4.51    1.34
 -10  24  -3    4.71    1.92
 -10 -24   3    6.42    1.82
  10 -24  -3    4.42    1.35
 -12 -24  -3    3.47    1.55
 -12 -24   3    3.11    1.78
  12 -24  -3    5.99    1.49
  -1 -25  -3   10.43    1.29
   1 -25   3   11.44    1.25
   1  25  -3   12.59    1.49
  -1  25   3   11.20    1.42
   1  25   3   12.50    1.43
  -1 -25   3    8.94    1.33
  -1  25  -3   11.14    1.43
  -1  25  -3   12.99    1.44
   1 -25  -3   11.47    1.33
  -3 -25  -3    0.51    1.11
  -3  25   3    1.15    1.14
  -3  25  -3   -0.50    1.29
  -3 -25   3    1.06    1.23
   3 -25  -3    2.38    1.05
  -3  25  -3    0.76    1.11
   3  25   3    1.36    1.29
  -5  25   3    3.84    1.27
  -5 -25  -3    5.67    1.31
   5 -25  -3    3.00    1.15
  -5 -25   3    5.33    1.44
  -5  25  -3    4.34    1.13
  -5  25  -3    2.59    1.54
  -7 -25  -3    8.48    1.43
  -7  25   3   10.37    1.52
  -7  25  -3    9.91    1.87
  -7 -25   3    9.55    1.75
   7 -25  -3   10.76    1.35
  -7  25  -3   10.59    1.38
  -9 -25  -3   -1.48    1.37
  -9 -25   3    0.32    1.65
  -9  25  -3    0.42    1.68
   9 -25  -3   -1.02    1.20
  -9  25  -3    0.27    1.13
 -11 -25  -3   10.41    1.84
 -11 -25   3   12.38    2.17
 -11  25  -3   12.48    1.66
  11 -25  -3   12.82    1.65
   0  26  -3    3.90    1.24
   0  26   3    3.23    1.27
   0 -26   3    2.16    1.17
   0 -26  -3    3.81    1.16
   0  26  -3    2.82    1.15
  -2  26   3   19.00    1.70
  -2 -26  -3   16.55    1.57
  -2  26  -3   19.69    1.67
   2 -26  -3   18.51    1.56
  -2 -26   3   17.94    1.68
  -2  26  -3   18.63    1.79
   2  26   3   20.97    1.77
  -4 -26  -3    5.94    1.34
  -4  26   3    6.79    1.33
  -4  26  -3    9.78    1.40
  -4 -26   3    6.34    1.50
  -4  26  -3    6.28    1.61
   4 -26  -3    7.49    1.28
  -6 -26  -3    3.14    1.25
  -6  26   3    2.25    1.32
  -6  26  -3    1.45    1.16
  -6 -26   3    1.49    1.48
   6 -26  -3    1.44    1.23
  -6  26  -3   -0.18    1.57
  -8  26   3   17.96    1.85
  -8 -26  -3   15.15    1.70
  -8  26  -3   17.96    1.73
   8 -26  -3   15.48    1.59
  -8 -26   3   16.61    2.15
  -8  26  -3   18.28    2.26
 -10 -26  -3    1.84    1.46
  10 -26  -3    3.30    1.41
 -10 -26   3    3.81    1.87
 -10  26  -3    2.17    1.36
  -1  27   3    7.38    1.37
  -1 -27  -3    9.28    1.36
   1 -27   3    7.47    1.27
   1  27  -3   10.03    1.51
   1 -27  -3    7.44    1.35
  -1  27  -3    5.64    1.34
   1  27   3    6.43    1.49
  -1 -27   3    6.36    1.41
  -3  27   3    9.04    1.49
  -3 -27  -3    6.39    1.40
  -3 -27   3    6.52    1.52
   3  27   3    9.13    1.60
   3 -27  -3    3.48    1.30
  -3  27  -3    4.27    1.46
  -3  27  -3    8.18    1.41
  -5 -27  -3    4.67    1.38
  -5  27   3    6.85    1.50
  -5 -27   3    7.38    1.67
  -5  27  -3    5.27    1.69
   5 -27  -3    4.26    1.28
  -5  27  -3    6.67    1.35
  -7  27   3   12.17    1.60
  -7 -27  -3    9.15    1.68
   7 -27  -3   11.67    1.56
  -7  27  -3   10.94    1.48
  -7 -27   3   11.30    1.92
  -9  27   3    2.68    1.53
  -9 -27  -3    2.64    1.64
  -9  27  -3    2.78    1.37
  -9 -27   3    0.19    1.65
   9 -27  -3    4.94    1.43
   0  28   3    1.76    1.38
   0  28  -3   -1.26    1.28
   0 -28   3    0.96    1.26
   0 -28  -3    0.07    1.20
  -2 -28  -3    0.20    1.31
  -2  28   3    1.48    1.24
   2 -28  -3    0.92    1.25
   2  28   3    0.37    1.39
  -2  28  -3    0.35    1.28
  -2 -28   3   -0.89    1.36
  -4  28   3    1.17    1.32
  -4 -28  -3   -0.60    1.29
   4 -28  -3   -3.59    1.24
  -4  28  -3   -1.26    1.11
  -4 -28   3    0.68    1.49
  -6  28   3    9.05    1.62
  -6 -28  -3    6.73    1.68
  -6 -28   3    4.65    1.74
  -6  28  -3    4.59    1.44
   6 -28  -3    8.40    1.51
  -8  28   3   15.20    1.85
  -8 -28  -3   12.94    1.94
   8 -28  -3   14.97    1.74
  -8  28  -3   13.72    1.76
  -8 -28   3   14.87    2.18
   1  29  -3    7.81    1.69
  -1  29   3    5.96    1.49
  -1 -29  -3    5.99    1.44
   1 -29   3    3.49    1.32
  -1 -29   3    1.93    1.41
  -1  29  -3    3.40    1.43
   1  29   3    5.44    1.54
   1 -29  -3    3.51    1.35
  -3 -29  -3    1.54    1.31
  -3  29   3    2.00    1.38
  -3 -29   3    1.38    1.55
  -3  29  -3    1.83    1.34
   3 -29  -3   -0.82    1.31
   3  29   3    0.19    1.46
  -5  29   3    5.44    1.53
  -5 -29  -3    3.83    1.50
  -5 -29   3    3.44    1.73
   5 -29  -3    3.18    1.44
  -5  29  -3    5.43    1.44
  -7 -29  -3   13.61    1.91
  -7  29   3   17.34    1.87
   7 -29  -3   16.61    1.80
  -7  29  -3   18.50    1.86
  -7 -29   3   15.72    2.21
   0  30  -3    1.48    1.51
   0  30   3    0.00    1.49
   0 -30   3   -0.49    1.38
   0 -30  -3   -1.63    1.36
  -2 -30  -3    2.09    1.42
  -2  30   3    3.11    1.46
   2 -30  -3    2.93    1.48
  -2  30  -3    5.52    1.56
   2  30   3    2.69    1.56
  -2 -30   3    0.55    1.59
  -4 -30  -3    1.49    1.47
  -4  30   3   -0.20    1.38
  -4  30  -3    1.18    1.44
   4 -30  -3    2.32    1.50
  -4 -30   3    1.37    1.69
  -6 -30  -3    4.16    1.57
  -6  30   3    9.14    1.80
  -6  30  -3    3.84    1.49
   6 -30  -3    7.82    1.64
  -6 -30   3    4.12    1.89
  -1 -31  -3   -0.01    1.44
  -1  31   3    1.67    1.62
   1 -31   3   -1.02    1.38
  -1  31  -3   -1.09    1.53
   1  31   3    3.12    1.66
  -1 -31   3   -0.23    1.52
   1 -31  -3   -1.65    1.45
  -3 -31  -3   -0.58    1.48
  -3  31   3    1.29    1.52
  -3 -31   3    0.12    1.71
   3  31   3   -1.80    1.63
   3 -31  -3   -0.45    1.50
  -3  31  -3    0.90    1.47
  -5 -31  -3    3.67    1.60
  -5  31   3    2.70    1.63
  -5 -31   3    1.24    1.88
  -5  31  -3    1.29    1.43
   5 -31  -3    4.27    1.63
   0  32   3   -0.61    1.64
   0 -32  -3    0.42    1.56
   0  32  -3   -1.18    1.64
   0 -32   3   -1.31    1.56
  -2 -32  -3    3.08    1.66
   2 -32  -3    4.95    1.67
  -2 -32   3    3.14    1.80
   0   0  -4   18.36    0.85
   0   0   4   17.93    0.86
   0   0   4   17.29    0.90
  -2   0  -4   21.62    0.95
  -2   0   4   20.20    1.05
   2   0   4   19.40    0.99
  -2   0   4   22.49    1.01
   2   0   4   22.59    0.99
   2   0  -4   21.07    1.01
   4   0   4  237.58    7.89
  -4   0   4  233.61    7.95
   4   0   4  227.57    7.89
   4   0  -4  233.84    7.92
  -4   0  -4  229.59    7.87
   6   0   4  189.55    6.73
  -6   0   4  200.76    6.84
   6   0  -4  193.35    6.78
  -6   0  -4  189.19    6.70
   6   0   4  204.88    6.74
  -8   0  -4   46.48    2.04
   8   0   4   45.33    2.07
   8   0   4   52.81    2.10
  -8   0   4   51.30    2.27
   8   0  -4   51.31    2.22
  10   0   4   42.29    2.03
  10   0  -4   41.07    2.17
 -10   0  -4   40.73    1.98
 -10   0   4   38.35    2.15
 -10   0  -4   41.06    2.26
  12   0   4   70.17    3.17
  12   0  -4   72.56    3.28
 -12   0   4   69.20    3.25
 -12   0  -4   74.27    3.09
 -12   0  -4   69.49    3.51
  14   0  -4   20.00    1.77
 -14   0  -4   19.76    1.93
  14   0   4   22.02    1.87
 -14   0   4   20.12    1.84
  16   0  -4    0.23    1.30
  16   0   4    2.63    1.32
 -16   0  -4   -1.05    1.28
 -16   0   4    2.62    1.27
  18   0  -4    3.70    1.67
  18   0   4    1.65    1.62
   1  -1   4    0.62    0.31
  -1   1   4    0.78    0.35
   1   1  -4    1.00    0.30
  -1  -1  -4    0.80    0.30
  -1   1   4    1.15    0.33
   1  -1   4    0.67    0.30
  -1  -1   4    1.21    0.34
   1   1   4    1.60    0.37
  -1  -1   4    1.08    0.38
  -1   1  -4    1.14    0.30
   1   1   4    1.10    0.31
   1  -1  -4    0.95    0.32
   3  -1   4   22.99    1.01
  -3   1   4   22.55    1.12
   3  -1   4   21.17    1.03
   3   1  -4   22.99    1.08
  -3  -1  -4   22.72    1.02
   3   1   4   24.30    1.05
   3  -1  -4   23.38    1.11
  -3  -1   4   22.46    1.15
  -3   1  -4   22.65    0.98
   3   1   4   22.22    1.07
  -3  -1   4   25.10    1.10
   5   1  -4   28.97    1.38
  -5  -1  -4   28.81    1.29
   5  -1   4   30.43    1.29
   5  -1   4   27.73    1.28
  -5   1   4   28.42    1.44
  -5  -1   4   28.85    1.47
  -5   1  -4   28.44    1.25
   5   1   4   31.01    1.35
   5   1   4   30.81    1.32
   5  -1  -4   28.86    1.39
  -7  -1  -4  163.81    5.69
   7   1  -4  163.54    5.78
  -7   1   4  161.59    5.81
   7  -1   4  169.96    5.71
   7  -1   4  158.79    5.69
   7   1   4  157.00    5.71
  -7  -1   4  158.34    5.83
   7   1   4  168.68    5.73
  -7   1  -4  159.74    5.67
   7  -1  -4  169.49    5.78
   9  -1   4   37.34    1.89
  -9  -1  -4   40.35    1.89
   9  -1   4   42.21    1.88
  -9   1   4   43.02    2.09
   9   1  -4   39.02    2.04
  -9  -1  -4   41.45    2.17
   9   1   4   39.84    1.93
  -9   1  -4   41.37    2.20
  -9   1  -4   41.67    1.88
   9  -1  -4   39.21    2.04
  -9  -1   4   42.19    2.13
 -11  -1  -4  106.96    4.67
  11  -1   4  107.45    4.18
 -11  -1  -4  106.35    4.08
  11   1  -4  107.47    4.25
 -11   1   4  103.51    4.21
  11  -1   4  106.10    4.10
 -11   1  -4  107.55    4.69
 -11  -1   4  108.13    4.28
 -11   1  -4  106.74    4.06
  11  -1  -4  101.38    4.21
  11   1   4  102.32    4.13
  13   1  -4    1.56    1.08
 -13  -1  -4    0.09    1.06
  13  -1   4    1.14    1.04
 -13   1   4    0.41    0.97
 -13  -1  -4    1.66    0.91
  13   1   4    3.43    1.06
 -13   1  -4    1.05    1.02
  13  -1  -4    0.17    1.01
 -13  -1   4    0.63    1.01
 -13   1  -4    0.50    0.85
 -15   1   4   22.15    1.89
  15  -1   4   20.42    1.80
 -15  -1  -4   22.64    1.99
  15   1  -4   26.38    2.25
  15  -1  -4   21.56    2.00
  15   1   4   20.81    1.87
 -15   1  -4   24.81    2.20
 -15  -1   4   18.80    1.79
  17  -1   4   17.14    1.83
  17   1  -4   21.60    2.18
 -17  -1   4   23.55    2.28
 -17   1  -4   15.35    1.97
  17  -1  -4   18.66    2.04
  17   1   4   16.56    1.96
  19   1  -4   24.52    2.37
  19  -1   4   23.40    2.37
  19   1   4   23.39    2.47
  19  -1  -4   27.97    2.65
   0   2   4    4.16    0.45
   0   2   4    3.50    0.45
   0   2  -4    4.05    0.37
   0  -2  -4    3.58    0.38
   0  -2   4    4.53    0.41
   0  -2   4    3.48    0.42
  -2  -2  -4    6.52    0.53
   2  -2   4    5.10    0.45
  -2   2   4    4.06    0.49
   2  -2   4    5.81    0.44
   2   2  -4    5.83    0.49
   2   2   4    4.23    0.46
  -2  -2   4    5.12    0.47
   2  -2  -4    4.15    0.46
   2   2   4    5.48    0.51
  -2   2  -4    5.27    0.41
  -2  -2   4    4.94    0.54
   4  -2   4   46.86    1.74
  -4  -2  -4   44.72    1.76
  -4   2   4   46.32    1.85
   4   2  -4   45.68    1.82
   4  -2   4   44.63    1.74
   4  -2  -4   45.13    1.83
  -4  -2   4   44.85    1.89
  -4   2  -4   44.91    1.71
   4   2   4   46.91    1.80
   4   2   4   44.46    1.80
   6  -2   4   15.76    0.99
   6  -2   4   16.34    0.93
  -6   2   4   16.04    1.15
   6   2  -4   15.46    1.12
  -6  -2  -4   15.70    0.99
   6   2   4   14.88    1.06
  -6   2  -4   14.69    0.91
   6  -2  -4   16.49    1.09
  -6  -2   4   15.93    1.26
   6   2   4   16.31    1.00
   8  -2   4   30.59    1.51
  -8   2   4   31.98    1.69
  -8  -2  -4   31.49    1.55
   8   2  -4   29.96    1.68
   8  -2   4   31.89    1.49
  -8   2  -4   29.16    1.46
  -8  -2   4   30.88    1.80
   8  -2  -4   31.73    1.66
   8   2   4   28.72    1.57
 -10   2   4    0.22    0.77
 -10  -2  -4    0.91    0.65
  10  -2   4    0.65    0.61
  10  -2   4    0.36    0.62
  10   2  -4    0.90    0.78
 -10  -2  -4    0.16    0.71
 -10  -2   4    0.99    0.83
 -10   2  -4    0.69    0.63
  10  -2  -4    0.42    0.81
  10   2   4    0.57    0.68
 -10   2  -4    0.46    0.70
 -12  -2  -4    8.92    1.08
  12  -2   4    7.50    1.09
 -12   2   4    7.57    1.22
  12   2  -4    8.40    1.23
 -12  -2  -4    8.57    1.22
  12  -2  -4    8.64    1.30
  12   2   4   10.85    1.22
 -12  -2   4   10.36    1.27
 -12   2  -4   11.09    1.36
 -12   2  -4    8.90    1.01
 -14  -2  -4    8.65    1.43
 -14  -2  -4    7.29    1.21
  14  -2   4    7.78    1.30
 -14   2   4    7.09    1.27
  14   2  -4    7.69    1.42
  14  -2  -4    8.74    1.47
 -14  -2   4    6.99    1.34
  14   2   4    6.57    1.40
 -14   2  -4    8.26    1.52
 -16  -2  -4    4.53    1.47
  16  -2   4    2.54    1.30
  16   2  -4    4.95    1.59
 -16   2  -4    2.56    1.44
  16   2   4    3.51    1.37
 -16  -2   4    3.19    1.29
  16  -2  -4    3.04    1.46
  18   2  -4    2.70    1.59
  18  -2   4    6.31    1.72
  18   2   4    4.60    1.73
  18  -2  -4    1.20    1.66
   1  -3   4   83.76    2.92
  -1   3   4   83.03    2.99
   1   3  -4   86.06    2.94
   1  -3   4   81.55    2.93
  -1  -3  -4   84.81    2.97
   1   3   4   86.96    2.99
  -1  -3   4   83.90    2.95
   1  -3  -4   82.19    2.97
   1   3   4   84.86    3.00
  -1  -3   4   80.51    2.97
  -1   3  -4   81.41    2.90
   3  -3   4   88.00    3.17
   3   3  -4   94.15    3.24
  -3   3   4   89.97    3.27
  -3  -3  -4   94.44    3.24
  -3  -3   4   89.86    3.29
  -3  -3   4   94.19    3.25
  -3   3  -4   86.92    3.14
   3  -3  -4   94.09    3.27
   3   3   4   87.78    3.25
  -5  -3  -4    3.78    0.54
   5   3  -4    4.24    0.55
   5  -3   4    3.94    0.44
  -5   3   4    3.66    0.56
   5  -3   4    3.78    0.47
  -5  -3   4    3.37    0.68
   5  -3  -4    3.60    0.57
   5   3   4    4.14    0.56
  -5   3  -4    3.18    0.41
   7  -3   4   89.92    3.35
   7  -3   4   96.64    3.36
   7   3  -4   90.23    3.47
  -7  -3  -4   89.86    3.40
  -7   3   4   93.71    3.48
  -7   3  -4   89.41    3.32
   7  -3  -4   94.91    3.45
   7   3   4   92.81    3.44
  -7  -3   4   90.57    3.59
  -9  -3  -4   50.27    2.46
   9   3  -4   48.12    2.34
  -9  -3  -4   53.20    2.22
  -9   3   4   49.80    2.30
   9  -3   4   53.56    2.15
   9  -3   4   46.96    2.13
  -9   3  -4   49.60    2.12
  -9   3  -4   49.09    2.54
   9  -3  -4   46.83    2.28
   9   3   4   49.07    2.25
  -9  -3   4   51.03    2.45
 -11   3   4   17.59    1.39
  11   3  -4   13.27    1.31
  11  -3   4   16.06    1.24
  11  -3   4   17.28    1.38
 -11  -3  -4   19.86    1.52
 -11  -3  -4   17.46    1.30
 -11  -3   4   17.00    1.49
  11  -3  -4   15.58    1.46
  11   3   4   16.89    1.38
 -11   3  -4   15.83    1.48
 -11   3  -4   19.29    1.38
  13  -3   4   12.37    1.35
  13   3  -4   17.83    1.71
 -13  -3  -4   14.32    1.39
 -13   3   4   14.85    1.51
 -13  -3  -4   15.25    1.59
  13   3   4   13.16    1.48
 -13   3  -4   14.24    1.68
 -13  -3   4   15.66    1.67
  13  -3  -4   12.43    1.50
  15   3  -4    4.46    1.45
  15  -3   4    4.11    1.21
 -15  -3  -4    2.86    1.25
 -15   3   4    2.45    1.23
 -15  -3   4    3.08    1.29
 -15   3  -4    2.42    1.34
  15   3   4    4.99    1.45
  15  -3  -4    1.19    1.30
  17   3  -4   14.98    1.99
  17  -3   4   11.50    1.73
 -17  -3   4    9.67    1.62
 -17   3  -4   12.71    1.85
  17   3   4   13.79    1.89
  17  -3  -4   10.35    1.79
  19  -3   4    5.58    1.84
  19   3  -4    3.34    1.80
  19  -3  -4    4.34    1.84
  19   3   4    4.60    1.96
   0  -4   4  141.26    5.00
   0  -4  -4  152.16    5.05
   0   4  -4  146.67    4.97
   0  -4   4  142.94    4.86
   0  -4   4  148.74    4.99
   2  -4   4  113.11    3.89
   2  -4   4  114.64    3.89
  -2  -4  -4  114.88    3.97
  -2   4   4  114.24    3.98
   2   4  -4  117.82    3.94
   2  -4  -4  113.45    3.97
  -2  -4   4  108.81    3.98
  -2  -4   4  118.12    3.96
  -2   4  -4  108.89    3.86
   2   4   4  109.33    3.79
  -4  -4  -4   28.79    1.30
  -4  -4  -4   28.48    1.15
  -4   4   4   28.17    1.35
   4  -4   4   30.74    1.22
   4  -4   4   28.94    1.19
   4   4  -4   30.03    1.32
   4  -4  -4   29.65    1.36
  -4  -4   4   30.81    1.34
  -4   4  -4   27.60    1.15
  -4  -4   4   30.21    1.47
   4   4   4   29.33    1.34
  -6   4   4   16.67    1.09
  -6  -4  -4   17.53    1.04
   6  -4   4   15.71    0.95
   6  -4   4   16.61    0.89
   6   4  -4   16.72    1.13
   6  -4  -4   14.66    1.09
  -6   4  -4   15.29    0.89
   6   4   4   15.66    1.12
  -6  -4   4   16.07    1.33
   8  -4   4   67.50    2.56
  -8  -4  -4   68.60    2.67
   8  -4   4   63.18    2.57
   8   4  -4   64.60    2.76
  -8   4   4   67.14    2.71
   8   4   4   64.30    2.70
  -8   4  -4   66.83    2.56
   8  -4  -4   67.40    2.70
  -8  -4   4   68.82    2.90
 -10   4   4   14.08    1.24
  10  -4   4   11.81    1.00
 -10  -4  -4   13.07    1.13
  10  -4   4   11.56    0.95
  10   4  -4   11.80    1.18
 -10  -4  -4   13.10    1.23
  10   4   4   10.52    1.05
  10  -4  -4   10.48    1.08
 -10   4  -4   10.30    1.21
 -10  -4   4   11.48    1.30
 -10   4  -4   11.52    0.95
  12  -4   4   30.48    2.02
 -12   4   4   31.86    2.05
  12   4  -4   29.75    2.17
 -12  -4  -4   30.85    2.22
 -12  -4  -4   31.75    2.03
 -12   4  -4   31.76    1.81
  12   4   4   32.78    2.17
  12  -4  -4   30.95    2.19
 -12  -4   4   33.41    2.31
 -12   4  -4   29.76    2.31
 -14  -4  -4    0.38    1.07
 -14   4   4    0.00    1.00
 -14  -4  -4   -0.58    1.03
  14   4  -4   -0.32    1.10
  14  -4   4   -0.01    1.00
 -14   4  -4   -0.69    1.15
  14   4   4   -0.33    1.12
  14  -4  -4   -1.84    1.21
 -14  -4   4   -0.18    1.21
  16   4  -4   18.77    1.93
 -16  -4  -4   22.30    2.05
  16  -4   4   19.77    1.79
  16  -4  -4   21.87    2.17
 -16  -4   4   25.23    2.16
  16   4   4   21.29    2.10
 -16   4  -4   24.18    2.33
  18  -4   4   25.34    2.28
  18   4  -4   26.55    2.56
  18   4   4   21.78    2.34
  18  -4  -4   23.34    2.34
   1  -5   4  124.56    4.37
   1   5  -4  133.43    4.38
  -1   5   4  128.89    4.46
  -1  -5  -4  126.53    4.43
   1  -5   4  124.52    4.35
   1   5   4  129.46    4.46
  -1   5  -4  123.42    4.26
  -1   5  -4  129.01    4.33
  -1  -5   4  124.22    4.42
   1  -5  -4  129.09    4.45
  -1  -5   4  128.41    4.30
   1   5   4  125.72    4.27
  -1  -5   4  131.77    4.40
  -3   5   4  247.22    8.54
  -3  -5  -4  252.72    8.54
   3  -5   4  239.26    8.43
   3  -5   4  248.98    8.43
   3   5  -4  253.19    8.51
  -3  -5  -4  259.55    8.31
   3  -5  -4  254.70    8.54
  -3  -5   4  261.09    8.59
   3   5   4  247.29    8.55
  -3   5  -4  242.08    8.40
  -3  -5   4  257.80    8.53
   5  -5   4    4.83    0.44
   5   5  -4    5.37    0.63
  -5  -5  -4    5.32    0.48
   5  -5   4    5.01    0.49
  -5   5   4    4.93    0.59
  -5  -5  -4    5.22    0.58
   5   5   4    5.43    0.66
  -5  -5   4    5.09    0.74
   5  -5  -4    4.35    0.58
  -5   5  -4    5.70    0.44
   7   5  -4    7.93    0.82
  -7   5   4    6.68    0.71
   7  -5   4    7.02    0.64
   7  -5   4    7.23    0.61
  -7  -5  -4    6.07    0.69
  -7  -5   4    8.45    0.96
   7  -5  -4    6.90    0.82
  -7   5  -4    7.07    0.62
   7   5   4    7.35    0.80
   9  -5   4   18.17    1.28
   9   5  -4   20.31    1.54
  -9  -5  -4   20.74    1.42
  -9   5   4   20.82    1.45
   9  -5   4   20.27    1.23
  -9  -5  -4   19.46    1.47
   9   5   4   18.82    1.47
   9  -5  -4   19.89    1.48
  -9   5  -4   20.85    1.23
  -9   5  -4   18.07    1.59
  -9  -5   4   21.87    1.76
  11   5  -4    7.84    1.10
 -11   5   4    6.73    0.99
 -11  -5  -4    7.40    1.08
  11  -5   4    6.27    0.94
 -11  -5  -4    7.46    1.04
  11  -5   4    6.21    0.86
  11  -5  -4    5.89    1.02
 -11   5  -4    5.50    1.08
  11   5   4    7.42    1.08
 -11  -5   4    6.02    1.16
 -11   5  -4    8.26    0.85
 -13  -5  -4   13.44    1.38
 -13   5   4   15.60    1.43
  13   5  -4   19.97    1.80
  13  -5   4   11.82    1.31
 -13  -5  -4   17.50    1.65
  13  -5  -4   14.02    1.50
 -13  -5   4   16.88    1.71
  13   5   4   14.82    1.49
 -13   5  -4   16.31    1.75
 -15  -5  -4   53.53    3.01
  15   5  -4   52.83    3.15
 -15  -5  -4   53.55    3.16
  15  -5   4   53.48    2.92
 -15   5  -4   47.48    3.32
 -15  -5   4   56.15    3.21
  15  -5  -4   51.28    3.18
  15   5   4   49.17    3.16
  17  -5   4    7.41    1.56
  17   5  -4    9.35    1.63
 -17   5  -4    4.64    1.64
  17   5   4    6.47    1.71
  17  -5  -4    7.48    1.84
 -17  -5   4    5.06    1.48
  19   5  -4   16.94    2.13
  19  -5   4   20.72    2.22
  19  -5  -4   20.40    2.52
  19   5   4   16.38    2.25
   0  -6   4  347.52   11.31
   0  -6   4  339.12   11.50
   0   6   4  350.15   11.58
   0   6  -4  340.17   11.47
   0  -6  -4  351.99   11.58
   0  -6   4  331.66   11.51
  -2   6   4  248.09    8.41
   2  -6   4  240.64    8.29
   2  -6   4  238.45    8.29
  -2  -6  -4  253.88    8.41
   2   6  -4  248.31    8.35
  -2   6  -4  244.62    8.17
   2  -6  -4  257.49    8.49
   2   6   4  245.04    8.18
  -2  -6   4  237.07    8.21
   2   6   4  251.26    8.43
   2  -6  -4  252.07    8.41
  -2  -6   4  252.78    8.38
  -2  -6   4  245.61    8.42
   4  -6   4   29.32    1.18
  -4  -6  -4   29.77    1.23
   4  -6   4   28.42    1.20
  -4   6   4   31.21    1.40
  -4  -6  -4   32.79    1.40
   4   6  -4   29.26    1.35
  -4  -6   4   30.74    1.39
   4  -6  -4   31.48    1.41
  -4  -6   4   29.83    1.54
   4   6   4   30.74    1.43
  -6  -6  -4    2.51    0.46
   6  -6   4    2.27    0.44
   6   6  -4    2.16    0.55
  -6   6   4    2.44    0.52
   6  -6   4    2.69    0.39
  -6  -6  -4    2.26    0.53
  -6  -6   4    3.00    0.76
   6  -6  -4    2.92    0.60
   6   6   4    3.25    0.62
   8   6  -4   55.61    2.43
  -8  -6  -4   56.13    2.38
   8  -6   4   56.72    2.21
   8  -6   4   52.49    2.21
  -8   6   4   54.98    2.36
  -8   6  -4   55.39    2.73
   8   6   4   52.05    2.42
  -8  -6   4   62.87    2.69
  -8   6  -4   57.80    2.16
   8  -6  -4   56.01    2.39
 -10  -6  -4   10.02    1.06
  10  -6   4    9.19    0.87
  10  -6   4    9.03    0.93
 -10   6   4   10.70    1.01
  10   6  -4   10.70    1.11
 -10  -6  -4   11.61    1.13
  10  -6  -4    8.62    1.06
 -10   6  -4    9.95    0.82
  10   6   4   10.94    1.16
 -10   6  -4    7.97    1.11
 -10  -6   4   12.87    1.33
 -12  -6  -4   24.98    1.99
 -12  -6  -4   24.68    1.94
  12   6  -4   22.30    1.70
 -12   6   4   24.32    1.84
  12  -6   4   21.72    1.76
  12   6   4   21.43    1.66
 -12   6  -4   25.39    2.16
 -12  -6   4   23.82    1.86
  12  -6  -4   23.25    1.78
 -14  -6  -4    8.84    1.36
 -14  -6  -4   13.05    1.43
 -14   6   4    8.18    1.24
  14   6  -4    8.93    1.40
  14  -6   4   11.80    1.40
 -14  -6   4   12.80    1.62
  14   6   4   10.99    1.60
 -14   6  -4    9.10    1.60
  14  -6  -4    7.73    1.42
  16  -6   4   68.95    3.56
  16   6  -4   70.74    3.78
 -16   6  -4   63.79    4.02
  16   6   4   68.48    3.83
  16  -6  -4   70.49    3.82
 -16  -6   4   76.52    3.79
  18  -6   4   19.37    2.06
  18   6  -4   17.34    2.26
  18   6   4   22.90    2.37
 -18  -6   4   18.18    2.02
  18  -6  -4   17.32    2.20
  -1  -7  -4  213.82    7.43
  -1   7   4  226.47    7.45
   1   7  -4  216.54    7.34
   1  -7   4  211.53    7.33
   1  -7   4  213.02    7.32
   1   7   4  220.53    7.25
   1   7   4  220.85    7.45
  -1  -7   4  216.54    7.38
   1  -7  -4  226.73    7.45
  -1   7  -4  216.31    7.23
  -1  -7   4  219.72    7.26
  -1  -7   4  211.94    7.41
   3  -7   4  106.79    3.81
  -3  -7  -4  117.12    3.84
   3   7  -4  110.22    3.92
   3  -7   4  108.93    3.82
  -3   7   4  111.99    3.97
  -3  -7  -4  112.85    3.99
  -3  -7   4  109.40    4.04
   3   7   4  111.91    4.00
  -3   7  -4  109.93    3.80
   3  -7  -4  111.76    3.98
   3  -7  -4  119.36    4.00
  -3  -7   4  113.17    3.97
   5  -7   4   16.82    0.82
  -5   7   4   16.87    1.09
  -5  -7  -4   16.69    1.11
  -5  -7  -4   18.32    0.94
   5  -7   4   17.11    0.85
   5   7  -4   17.29    1.08
   5   7   4   17.79    1.17
   5  -7  -4   16.90    1.11
  -5  -7   4   18.79    1.38
   5  -7  -4   19.62    1.17
   7  -7   4    2.81    0.52
   7  -7   4    3.07    0.46
  -7  -7  -4    2.35    0.53
  -7   7   4    3.63    0.63
  -7  -7  -4    2.99    0.65
   7   7  -4    2.40    0.61
   7  -7  -4    3.21    0.67
   7   7   4    4.31    0.71
  -7  -7   4    3.09    0.85
  -9  -7  -4    1.63    0.75
  -9   7   4    1.02    0.65
   9   7  -4    0.02    0.67
  -9  -7  -4    1.14    0.68
   9  -7   4    1.58    0.53
   9  -7   4    0.26    0.58
   9   7   4    1.65    0.71
  -9  -7   4    1.14    0.89
  -9   7  -4    0.98    0.70
   9  -7  -4    0.91    0.68
 -11  -7  -4    4.78    0.95
  11  -7   4    6.21    0.95
 -11  -7  -4    4.96    1.00
  11  -7   4    3.64    0.74
  11   7  -4    5.33    1.03
 -11   7   4    5.01    0.91
  11  -7  -4    4.67    0.99
 -11  -7   4    2.53    1.09
  11   7   4    3.42    0.99
 -11   7  -4    5.25    0.68
 -11   7  -4    3.27    1.05
 -13  -7  -4   11.51    1.36
 -13   7   4   10.96    1.23
 -13  -7  -4   14.46    1.48
  13  -7   4    9.71    1.22
  13   7  -4   11.48    1.43
 -13   7  -4   12.75    1.68
  13  -7  -4   10.88    1.44
  13   7   4   11.65    1.46
 -13  -7   4   12.45    1.62
 -15  -7  -4   27.83    2.40
  15   7  -4   32.09    2.64
 -15  -7  -4   34.90    2.54
  15  -7   4   25.60    1.98
 -15   7  -4   26.50    2.48
  15  -7  -4   27.73    2.19
 -15  -7   4   33.00    2.66
  15   7   4   26.68    2.14
  17   7  -4   31.67    2.49
  17  -7   4   38.28    2.83
 -17  -7   4   40.39    3.06
  17   7   4   32.23    2.64
  17  -7  -4   32.57    2.58
 -17   7  -4   36.08    3.25
   0  -8   4   29.14    1.30
   0   8  -4   31.30    1.16
   0  -8  -4   30.77    1.39
   0  -8   4   31.15    1.27
   0   8   4   31.23    1.40
   0   8  -4   28.43    1.27
   0   8   4   32.80    1.30
   0  -8   4   31.21    1.24
  -2   8   4  163.07    5.70
   2   8  -4  162.73    5.61
   2  -8   4  155.47    5.54
  -2  -8  -4  168.39    5.71
   2   8   4  166.02    5.54
  -2  -8   4  166.26    5.66
   2   8   4  155.31    5.71
  -2  -8   4  163.55    5.72
  -2   8  -4  162.27    5.52
   2  -8  -4  168.78    5.71
   2  -8  -4  176.36    5.72
  -4  -8  -4   48.69    2.04
  -4   8   4   49.32    2.01
  -4  -8  -4   49.04    1.89
   4   8  -4   49.66    1.98
   4   8   4   49.24    2.08
  -4  -8   4   52.88    2.05
   4  -8  -4   50.70    2.03
   4  -8  -4   50.04    2.03
  -4  -8   4   50.97    2.21
  -6  -8  -4    8.74    0.69
  -6  -8  -4    8.86    0.81
  -6   8   4    9.73    0.82
   6  -8   4    8.98    0.72
   6  -8   4    9.27    0.66
   6   8  -4    9.91    0.83
  -6  -8   4    9.94    1.06
   6  -8  -4    8.88    0.82
   6   8   4   10.31    0.94
   6  -8  -4   11.04    0.89
  -8  -8  -4   24.06    1.45
   8  -8   4   21.60    1.22
  -8  -8  -4   22.26    1.49
  -8   8   4   21.47    1.35
   8  -8   4   23.15    1.18
   8   8  -4   20.79    1.51
  -8  -8  -4   23.27    1.27
   8   8   4   23.69    1.56
  -8  -8   4   23.67    1.83
  -8   8  -4   19.61    1.62
   8  -8  -4   21.07    1.49
 -10   8   4   10.48    1.02
 -10  -8  -4   10.91    1.11
  10   8  -4   10.52    1.15
  10  -8   4   11.76    1.03
 -10  -8  -4   12.41    1.14
  10  -8   4   12.00    0.95
  10  -8  -4   10.43    1.13
  10   8   4    8.77    1.11
 -10  -8   4   10.70    1.31
 -10   8  -4   10.66    1.30
 -12   8   4   18.01    1.41
  12  -8   4   18.13    1.38
 -12  -8  -4   18.30    1.56
  12   8  -4   17.90    1.54
 -12  -8  -4   16.05    1.46
 -12  -8   4   20.42    1.78
  12   8   4   21.01    1.78
  12  -8  -4   17.54    1.59
 -12   8  -4   20.46    1.95
 -14  -8  -4    4.83    1.30
  14  -8   4    6.38    1.18
 -14  -8  -4    4.90    1.21
  14   8  -4    4.75    1.28
  14  -8  -4    6.89    1.45
 -14   8  -4    4.47    1.46
 -14  -8   4    6.66    1.39
  14   8   4    5.11    1.43
 -16  -8  -4   34.42    2.78
  16  -8   4   33.65    2.59
  16   8  -4   26.66    2.21
 -16   8  -4   31.75    2.72
  16  -8  -4   31.15    2.47
 -16  -8   4   29.69    2.37
  16   8   4   37.89    3.05
  18  -8   4   17.20    1.95
  18   8  -4   12.20    1.89
  18   8   4   15.16    2.11
  18  -8  -4   12.86    2.12
 -18  -8   4   12.15    1.85
   1   9  -4  112.74    3.86
   1  -9   4  108.19    3.87
   1  -9   4  110.40    3.85
  -1   9   4  115.97    4.01
  -1  -9  -4  113.81    4.02
   1  -9  -4  112.01    4.01
   1   9   4  108.45    4.01
  -1  -9   4  115.61    3.93
   1  -9  -4  122.17    4.06
  -1   9  -4  110.39    3.87
   1   9   4  111.64    3.89
  -1  -9   4  109.38    3.98
   3   9  -4  205.64    7.33
  -3  -9  -4  215.31    7.42
  -3   9   4  219.00    7.40
  -3  -9  -4  227.12    7.25
   3  -9  -4  230.62    7.43
  -3  -9   4  218.75    7.49
   3  -9  -4  212.19    7.40
   3   9   4  209.78    7.43
   3   9   4  213.94    7.23
  -3  -9   4  216.61    7.40
  -3   9  -4  205.28    7.20
  -3  -9   4  212.41    7.26
  -5  -9  -4   18.40    1.22
  -5   9   4   18.12    1.12
  -5  -9  -4   17.91    1.02
   5   9  -4   18.66    1.12
   5   9   4   19.08    1.26
  -5  -9   4   17.22    1.45
   5  -9  -4   20.05    1.19
   5  -9  -4   18.85    1.19
  -5  -9   4   20.39    1.22
  -7  -9  -4    3.91    0.72
   7  -9   4    3.76    0.45
   7   9  -4    2.91    0.71
  -7   9   4    2.75    0.60
   7  -9   4    3.99    0.50
  -7  -9  -4    4.07    0.59
   7   9   4    3.59    0.78
   7  -9  -4    4.11    0.74
   7  -9  -4    5.23    0.75
  -7  -9   4    3.30    0.90
   9   9  -4    3.49    0.83
  -9  -9  -4    3.66    0.71
  -9  -9  -4    4.49    0.90
  -9  -9  -4    4.68    0.81
   9  -9   4    4.79    0.70
  -9   9   4    3.23    0.70
   9  -9   4    3.56    0.59
  -9  -9   4    5.76    1.13
   9  -9  -4    3.85    0.84
   9   9   4    2.11    0.84
  -9   9  -4    3.75    0.96
  11   9  -4    4.46    1.13
 -11   9   4    4.36    0.85
  11  -9   4    5.38    0.92
 -11  -9  -4    3.73    1.01
  11  -9   4    4.37    0.77
 -11  -9  -4    6.05    1.04
 -11  -9   4    4.41    1.20
  11  -9  -4    4.51    1.01
  11   9   4    5.77    1.11
 -11   9  -4    4.59    1.19
 -13  -9  -4   27.40    2.08
 -13  -9  -4   22.13    1.75
  13  -9   4   18.72    1.54
  13   9  -4   20.37    1.84
  13   9   4   22.93    2.08
  13  -9  -4   23.68    1.92
 -13  -9   4   23.13    1.95
 -13   9  -4   22.49    2.18
  15   9  -4   34.62    2.76
  15  -9   4   33.21    2.48
 -15  -9  -4   37.91    2.75
 -15   9  -4   32.48    2.98
  15   9   4   35.84    2.95
  15  -9  -4   32.92    2.80
 -15  -9   4   36.29    2.86
  17  -9   4   10.37    1.67
  17   9  -4    9.46    1.75
  17   9   4    9.01    1.82
 -17   9  -4    9.21    1.94
 -17  -9   4   12.06    1.82
  17  -9  -4    8.44    1.85
   0 -10   4  333.74   11.28
   0 -10   4  333.99   11.30
   0  10   4  339.04   11.17
   0  10   4  340.34   11.39
   0  10  -4  333.75   11.16
  -2 -10  -4  148.22    5.08
  -2  10   4  147.10    5.06
   2  10  -4  139.24    4.94
  -2 -10   4  141.91    5.02
   2 -10  -4  142.79    5.06
  -2  10  -4  141.36    4.91
  -2 -10   4  141.14    5.09
   2 -10  -4  155.35    5.09
   2  10   4  145.27    4.93
  -2 -10   4  141.92    4.95
   2  10   4  140.24    5.07
  -4  10   4    0.98    0.49
  -4 -10  -4    1.85    0.48
  -4 -10  -4    1.17    0.52
   4  10  -4    2.80    0.47
  -4 -10   4    1.19    0.71
   4 -10  -4    1.29    0.56
   4  10   4    1.92    0.61
   4 -10  -4    3.08    0.57
  -4 -10   4    2.91    0.59
  -4 -10   4    2.21    0.54
  -6  10   4   17.43    1.14
  -6 -10  -4   17.24    1.05
  -6 -10  -4   17.38    1.27
   6  10  -4   16.22    1.21
   6 -10  -4   17.08    1.21
  -6 -10   4   16.07    1.29
   6  10   4   14.15    1.11
   6 -10  -4   17.91    1.20
  -8 -10  -4   39.35    1.97
  -8 -10  -4   37.27    1.70
   8 -10   4   34.34    1.55
  -8  10   4   33.60    1.75
   8 -10   4   36.34    1.60
  -8 -10  -4   38.75    1.87
   8  10  -4   37.21    1.93
  -8  10  -4   33.79    2.16
  -8 -10   4   39.42    2.26
   8  10   4   38.77    2.02
   8 -10  -4   34.83    1.88
 -10 -10  -4   16.88    1.37
  10 -10   4   15.71    1.13
 -10  10   4   15.62    1.17
  10 -10   4   13.18    1.00
  10  10  -4   13.53    1.34
 -10 -10  -4   19.12    1.53
 -10 -10   4   14.68    1.61
  10 -10  -4   15.85    1.32
 -10  10  -4   13.07    1.45
  10  10   4   14.74    1.38
 -12 -10  -4   19.23    1.64
 -12 -10  -4   20.16    1.83
 -12  10   4   19.33    1.61
  12  10  -4   18.53    1.66
  12 -10   4   19.36    1.40
  12  10   4   23.46    1.99
 -12  10  -4   15.40    1.71
 -12 -10   4   21.27    1.93
  12 -10  -4   17.77    1.64
  14  10  -4   10.41    1.52
  14 -10   4   13.24    1.39
 -14 -10  -4   14.60    1.61
 -14  10  -4   10.32    1.76
  14  10   4   13.80    1.76
 -14 -10   4   12.96    1.70
  14 -10  -4   14.35    1.66
 -16 -10  -4   42.09    3.12
  16  10  -4   44.51    3.14
  16 -10   4   46.30    2.85
  16  10   4   43.67    3.33
 -16 -10   4   40.83    3.17
 -16  10  -4   47.98    3.49
  16 -10  -4   38.72    3.20
  18 -10   4   43.42    3.14
  18  10  -4   43.56    3.38
  18 -10  -4   37.57    2.98
 -18 -10   4   42.87    3.40
  18  10   4   45.38    3.62
  -1  11   4  162.70    5.81
   1  11  -4  167.41    5.66
  -1 -11  -4  162.86    5.82
  -1 -11   4  169.95    5.76
   1  11   4  167.62    5.70
   1 -11  -4  176.50    5.85
   1  11   4  167.91    5.84
  -1  11  -4  167.91    5.68
   1 -11  -4  167.97    5.83
  -1 -11   4  168.50    5.70
  -1 -11   4  157.41    5.79
  -3  11   4  138.07    4.97
   3  11  -4  135.01    4.88
  -3 -11  -4  141.94    5.02
  -3 -11  -4  148.92    4.89
  -3 -11   4  141.41    4.90
  -3 -11   4  140.26    5.10
  -3  11  -4  133.58    4.84
   3  11   4  140.59    5.03
  -3 -11   4  140.90    5.00
   3 -11  -4  151.55    5.02
   3  11   4  143.18    4.88
   3 -11  -4  139.91    4.99
  -5 -11  -4   10.98    0.89
  -5 -11  -4   12.13    0.92
  -5  11   4   10.80    0.84
   5  11  -4   12.01    0.99
  -5 -11   4   11.98    0.96
   5 -11  -4    8.64    0.83
   5  11   4   11.81    0.96
  -5 -11   4   11.71    1.11
   5 -11  -4   11.36    0.87
  -5 -11   4   11.23    0.85
  -7 -11  -4    7.26    0.85
   7  11  -4    7.40    0.83
  -7 -11  -4    7.28    0.73
  -7  11   4    8.46    0.81
   7 -11  -4    9.16    0.88
  -7 -11   4    6.63    1.07
   7  11   4    7.88    1.00
   7 -11  -4    6.90    0.82
  -7  11  -4    7.46    1.05
   9 -11   4   19.21    1.34
  -9  11   4   20.84    1.39
   9 -11   4   20.22    1.22
  -9 -11  -4   21.32    1.53
  -9 -11  -4   24.43    1.72
   9  11  -4   19.60    1.66
  -9  11  -4   20.12    1.86
   9 -11  -4   21.55    1.64
  -9 -11   4   18.24    1.60
   9  11   4   19.65    1.52
  11 -11   4    0.32    0.83
 -11  11   4    1.90    0.76
  11 -11   4    0.06    0.67
 -11 -11  -4    1.68    1.06
 -11 -11  -4    0.91    0.85
  11  11  -4    0.31    0.97
  11 -11  -4    0.91    1.00
  11  11   4    1.66    1.11
 -11 -11   4    1.66    1.17
 -11  11  -4    0.20    1.05
  13  11  -4   12.65    1.60
 -13 -11  -4   17.59    1.62
  13 -11   4   14.54    1.39
  13  11   4   17.12    1.89
 -13  11  -4   13.39    1.77
  13 -11  -4   13.29    1.54
 -13 -11   4   15.39    1.74
  15 -11   4   24.53    1.83
 -15 -11  -4   23.58    2.14
  15  11  -4   24.66    2.16
 -15  11  -4   21.98    2.41
 -15 -11   4   19.92    2.00
  15 -11  -4   21.19    2.09
  15  11   4   23.00    2.19
  17  11  -4   11.21    1.82
  17 -11   4   18.11    1.89
 -17 -11   4   14.31    2.00
 -17  11  -4   14.54    2.27
  17  11   4   15.32    2.16
  17 -11  -4   18.02    2.25
   0 -12   4   15.62    0.97
   0  12   4   15.71    1.09
   0 -12  -4   14.96    1.07
   0  12   4   14.64    1.01
   0 -12   4   14.62    0.89
   0  12  -4   15.76    1.02
   0 -12   4   13.88    0.99
  -2 -12  -4   24.26    1.35
  -2  12   4   24.08    1.29
   2  12  -4   24.32    1.10
  -2 -12   4   21.84    1.44
  -2 -12   4   25.25    1.27
   2 -12  -4   26.97    1.33
  -2 -12   4   25.88    1.29
   2  12   4   24.03    1.35
   2  12   4   24.19    1.27
   2 -12  -4   24.23    1.31
  -2  12  -4   24.80    1.24
  -4  12   4   17.00    1.11
   4  12  -4   15.01    0.98
  -4 -12  -4   13.99    1.19
  -4 -12  -4   17.20    1.03
  -4 -12   4   16.97    1.21
  -4 -12   4   11.35    1.10
  -4 -12   4   13.06    1.05
  -4  12  -4   13.74    0.99
   4 -12  -4   13.11    1.10
   4  12   4   15.77    1.23
   4 -12  -4   15.28    1.11
  -6 -12  -4    4.42    0.78
  -6 -12  -4    3.94    0.63
   6  12  -4    3.06    0.64
  -6  12   4    4.53    0.67
  -6 -12   4    4.26    0.99
   6 -12  -4    5.31    0.74
   6 -12  -4    3.62    0.69
   6  12   4    6.45    0.91
   8  12  -4   13.28    1.11
  -8 -12  -4   15.69    1.21
  -8  12   4   12.04    0.95
  -8 -12  -4   11.46    1.13
  -8  12  -4   10.22    1.21
   8 -12  -4   12.38    1.07
   8  12   4   12.18    1.15
  -8 -12   4   12.72    1.38
   8 -12  -4   13.31    1.10
  10 -12   4    3.84    0.71
  10  12  -4    4.26    1.09
 -10  12   4    5.74    0.85
 -10 -12  -4    6.15    0.94
  10 -12   4    5.53    0.86
 -10 -12  -4    5.72    1.07
 -10  12  -4    4.93    1.18
  10 -12  -4    4.07    1.03
  10  12   4    5.66    1.14
 -10 -12   4    5.77    1.31
 -12 -12  -4   11.35    1.40
 -12 -12  -4   10.40    1.19
  12  12  -4    7.93    1.31
  12 -12   4   10.43    1.19
 -12  12  -4   11.28    1.60
 -12 -12   4   10.10    1.57
  12  12   4    9.32    1.39
  12 -12  -4    7.97    1.32
  14 -12   4   13.01    1.41
 -14 -12  -4   11.88    1.57
  14  12  -4   11.52    1.52
 -14  12  -4   10.57    1.81
  14  12   4   12.11    1.83
  14 -12  -4   13.51    1.74
 -14 -12   4   12.02    1.73
  16 -12   4    9.55    1.56
  16  12  -4    8.97    1.65
 -16 -12  -4    7.95    1.62
  16 -12  -4    6.69    1.80
  16  12   4    4.31    1.70
 -16 -12   4    6.01    1.64
 -16  12  -4    4.72    1.81
  18 -12  -4    3.05    1.96
   1 -13   4    3.18    0.44
  -1  13   4    2.91    0.61
   1  13  -4    3.77    0.63
  -1 -13  -4    2.20    0.55
   1 -13   4    2.86    0.49
  -1  13   4    3.46    0.61
  -1 -13   4    3.55    0.59
   1  13   4    3.78    0.60
  -1 -13   4    3.03    0.56
  -1 -13   4    1.73    0.65
   1  13   4    3.35    0.61
   1 -13  -4    3.51    0.62
  -1  13  -4    3.51    0.60
   1 -13  -4    3.87    0.59
   3  13  -4    3.01    0.45
  -3 -13  -4    3.44    0.67
  -3 -13  -4    2.51    0.53
  -3  13   4    2.48    0.55
  -3 -13   4    3.14    0.63
   3 -13  -4    2.23    0.57
   3  13   4    2.09    0.65
  -3 -13   4    2.42    0.78
   3 -13  -4    1.98    0.58
   3  13   4    2.12    0.60
  -3 -13   4    2.99    0.61
  -3  13  -4    2.47    0.54
  -5 -13  -4    8.54    0.91
   5  13  -4    8.88    0.79
  -5  13   4   10.30    0.82
  -5 -13  -4   10.17    0.81
   5  13   4    8.29    0.93
  -5 -13   4    8.80    1.13
   5 -13  -4    9.86    0.87
  -5 -13   4   11.25    1.03
   5 -13  -4    8.11    0.81
  -7  13   4   89.71    3.46
  -7 -13  -4   89.78    3.65
  -7 -13  -4   94.12    3.76
   7  13  -4   97.45    3.60
  -7 -13   4   96.33    3.90
   7 -13  -4   93.27    3.55
   7  13   4   93.88    3.72
  -7  13  -4   82.56    4.13
   7 -13  -4   93.01    3.56
  -9 -13  -4   47.84    2.52
  -9 -13  -4   49.92    2.41
   9  13  -4   51.59    2.49
  -9  13   4   47.76    2.19
   9  13   4   49.97    2.66
  -9 -13   4   50.19    2.82
  -9  13  -4   48.98    2.91
   9 -13  -4   49.15    2.39
  11 -13   4   51.28    2.46
  11  13  -4   57.99    3.00
  11 -13   4   59.76    2.63
 -11 -13  -4   61.77    2.88
 -11 -13  -4   62.44    3.04
 -11  13  -4   54.09    3.38
  11 -13  -4   61.21    2.93
 -11 -13   4   62.35    3.30
  11  13   4   64.69    3.18
  13 -13   4    1.97    1.04
  13  13  -4    0.38    1.15
 -13 -13  -4    1.70    1.17
  13  13   4    1.41    1.34
  13 -13  -4    0.79    1.27
 -13  13  -4    1.42    1.42
 -13 -13   4    1.93    1.36
 -15 -13  -4    2.46    1.42
  15  13  -4    1.29    1.33
  15 -13   4    3.28    1.32
  15 -13  -4    1.65    1.55
  15  13   4    2.05    1.54
 -15 -13   4    3.40    1.57
 -15  13  -4    3.07    1.67
  17 -13   4    7.56    1.62
 -17 -13  -4    5.40    1.81
  17  13  -4    7.63    1.80
 -17  13  -4    8.02    2.05
 -17 -13   4    7.74    1.69
  17  13   4    7.28    1.85
  17 -13  -4    7.88    2.08
   0 -14  -4   -0.81    0.56
   0  14   4   -0.20    0.51
   0 -14   4   -0.38    0.55
   0 -14   4   -0.17    0.46
   0  14   4    0.43    0.56
   0  14  -4    0.11    0.51
   2  14  -4    6.56    0.52
  -2  14   4    6.36    0.72
  -2 -14  -4    6.81    0.83
  -2 -14   4    4.02    0.82
   2  14   4    6.36    0.77
  -2 -14   4    7.08    0.71
  -2  14  -4    6.64    0.72
  -2 -14   4    7.84    0.77
   2 -14  -4    7.01    0.72
   2 -14  -4    7.41    0.76
   2  14   4    5.28    0.71
   4  14  -4   21.64    1.22
  -4  14   4   21.91    1.28
  -4 -14  -4   22.68    1.50
  -4 -14  -4   22.51    1.30
   4 -14  -4   23.68    1.39
  -4  14  -4   21.60    1.28
   4  14   4   23.92    1.39
   4  14   4   23.66    1.51
  -4 -14   4   19.67    1.70
  -4 -14   4   24.05    1.53
   4 -14  -4   25.38    1.39
   6  14  -4   30.08    1.58
  -6 -14  -4   24.84    1.73
  -6  14   4   28.96    1.50
  -6 -14   4   29.47    2.08
   6 -14  -4   29.89    1.58
  -6  14  -4   26.22    1.93
   6  14   4   27.93    1.83
   6 -14  -4   24.88    1.56
  -8 -14  -4   22.38    1.41
  -8 -14  -4   22.18    1.78
  -8  14   4   20.31    1.43
   8  14  -4   23.35    1.67
  -8  14  -4   19.18    1.71
   8 -14  -4   20.41    1.61
   8 -14  -4   21.74    1.57
   8  14   4   23.47    1.91
  -8 -14   4   20.57    1.72
  10 -14   4   18.68    1.44
  10  14  -4   19.48    1.53
  10 -14   4   16.68    1.24
 -10 -14  -4   20.80    1.51
 -10 -14  -4   14.99    1.43
 -10 -14   4   17.84    1.74
  10 -14  -4   18.14    1.44
 -10  14  -4   15.35    1.74
  10  14   4   19.49    1.66
  12  14  -4   10.29    1.42
  12 -14   4    8.75    1.16
 -12 -14  -4   11.54    1.50
 -12  14  -4   10.73    1.76
 -12 -14   4   12.15    1.70
  12  14   4   11.52    1.55
  12 -14  -4    9.20    1.36
  14 -14   4    2.72    1.17
 -14 -14  -4    2.08    1.31
  14  14  -4    2.51    1.30
 -14  14  -4    1.12    1.58
  14  14   4    3.21    1.56
  14 -14  -4    1.50    1.43
 -14 -14   4    3.50    1.44
 -16 -14  -4    0.30    1.51
  16 -14   4    3.15    1.48
 -16 -14   4    1.96    1.64
 -16  14  -4   -0.42    1.73
  16 -14  -4    2.42    1.70
  16  14   4    0.50    1.62
  -1  15   4   19.94    1.27
   1  15  -4   19.21    1.27
  -1 -15  -4   19.20    1.32
  -1  15   4   19.40    1.24
   1 -15   4   16.55    1.14
  -1 -15   4   18.12    1.19
   1 -15  -4   17.98    1.24
   1  15   4   21.16    1.27
  -1 -15   4   16.03    1.18
  -1 -15   4   19.03    1.27
  -1  15  -4   18.08    1.24
   1  15   4   19.45    1.30
   1 -15  -4   18.88    1.27
  -3 -15  -4    7.70    0.93
  -3  15   4    8.39    0.80
   3  15  -4    7.50    0.62
  -3 -15   4    9.07    1.05
   3  15   4    8.29    0.86
  -3  15  -4    8.23    0.77
   3 -15  -4    7.26    0.82
  -3 -15   4    7.68    0.91
   3  15   4    8.73    0.88
   3 -15  -4    8.86    0.84
   5  15  -4    5.54    0.72
  -5  15   4    5.47    0.71
  -5 -15  -4    5.27    0.87
   5 -15  -4    4.73    0.94
   5 -15  -4    5.52    0.80
   5  15   4    5.18    0.93
  -5 -15   4    4.23    1.06
  -5 -15   4    5.04    0.98
   5 -15  -4    5.11    0.77
  -5  15  -4    5.36    0.75
  -7  15   4   63.65    2.72
  -7 -15  -4   70.12    3.00
   7  15  -4   69.26    2.86
  -7 -15   4   70.25    3.28
   7 -15  -4   64.01    2.81
   7 -15  -4   73.06    2.86
  -7  15  -4   64.64    3.37
   7  15   4   71.04    3.10
   9  15  -4    5.03    1.03
  -9 -15  -4    5.72    1.17
   9 -15  -4    5.70    1.00
  -9  15  -4    7.41    1.36
  -9 -15   4    6.89    1.38
   9  15   4    4.98    1.18
  11  15  -4   42.19    2.60
  11  15  -4   40.39    2.37
  11 -15   4   38.52    2.17
 -11 -15  -4   44.40    2.68
  11  15   4   47.63    2.87
 -11  15  -4   41.85    3.02
  11 -15  -4   44.70    2.50
 -11 -15   4   55.42    3.06
  13 -15   4    5.49    1.15
 -13 -15  -4    3.99    1.40
  13  15  -4    4.91    1.39
  13  15   4    5.17    1.52
 -13 -15   4    4.20    1.48
  13 -15  -4    7.68    1.46
 -13  15  -4    3.66    1.70
 -15 -15  -4   22.53    2.12
  15  15  -4   20.83    1.97
  15 -15   4   23.98    1.84
  15 -15  -4   23.12    2.26
  15  15   4   25.14    2.42
 -15  15  -4   22.74    2.48
 -15 -15   4   23.19    2.37
 -17 -15  -4   13.10    2.17
  17 -15   4   13.45    1.82
  17  15  -4   11.60    1.95
 -17 -15   4   11.82    1.91
  17 -15  -4   10.90    2.19
  17  15   4   13.06    2.12
   0  16   4    0.29    0.62
   0  16   4    0.73    0.56
   0  16  -4    0.73    0.60
   0 -16   4    0.62    0.57
   0 -16  -4    0.17    0.58
   0 -16   4   -0.26    0.65
  -2  16   4   34.90    1.73
  -2  16   4   35.67    1.69
   2  16  -4   34.28    1.40
  -2 -16  -4   34.30    1.80
   2 -16  -4   33.46    1.73
  -2 -16   4   32.92    1.83
  -2 -16   4   28.91    1.87
   2 -16  -4   38.71    1.73
   2  16   4   32.36    1.73
  -2  16  -4   32.79    1.66
   2  16   4   33.41    1.76
   4  16  -4   44.36    1.89
  -4  16   4   46.94    2.00
  -4 -16  -4   45.08    2.17
   4 -16  -4   45.77    2.09
   4 -16  -4   42.23    2.36
  -4  16  -4   42.19    1.97
   4 -16  -4   48.24    2.07
  -4 -16   4   42.89    2.39
   4  16   4   45.24    2.09
  -4 -16   4   44.12    2.25
   4  16   4   45.89    2.22
  -6  16   4   33.26    1.69
  -6 -16  -4   34.42    2.03
   6  16  -4   36.02    1.81
   6 -16  -4   34.05    1.85
  -6  16  -4   32.39    1.74
  -6 -16   4   37.01    2.34
   6  16   4   35.99    2.13
   6 -16  -4   39.01    1.84
  -6  16  -4   30.75    2.26
   8  16  -4   19.99    1.66
  -8 -16  -4   18.59    1.45
   8 -16  -4   19.02    1.58
  -8  16  -4   19.82    1.81
  -8 -16   4   20.15    1.75
   8  16   4   20.79    1.69
  10  16  -4   40.33    2.46
 -10 -16  -4   39.70    2.56
 -10  16  -4   37.94    2.93
 -10 -16   4   47.93    2.91
  10  16   4   43.34    2.77
  10 -16  -4   43.71    2.37
 -12 -16  -4   18.46    1.86
  12  16  -4   14.48    1.61
 -12 -16   4   19.60    1.97
  12 -16  -4   17.66    1.65
 -12  16  -4   20.61    2.24
  12  16   4   17.33    2.05
  14  16  -4   19.78    1.97
 -14 -16  -4   19.06    2.02
  14 -16   4   19.82    1.63
  14 -16  -4   20.27    1.95
  14  16   4   16.24    2.13
 -14 -16   4   23.86    2.31
 -14  16  -4   19.76    2.30
  16 -16   4    1.03    1.42
 -16 -16  -4    0.92    1.54
 -16 -16   4    1.23    1.50
  16 -16  -4    0.18    1.80
 -16  16  -4    2.04    1.91
  16  16   4    1.75    1.89
  -1 -17  -4    7.09    0.88
   1 -17   4    7.76    0.78
  -1  17   4    9.65    0.87
   1  17  -4   10.86    0.99
  -1  17   4    9.45    0.98
   1 -17  -4    8.48    0.85
   1  17   4    9.09    0.94
  -1 -17   4    6.75    0.89
   1 -17  -4    8.64    0.89
  -1  17  -4    6.74    0.83
  -1 -17   4    7.09    0.95
   1  17   4    8.46    0.87
   1 -17  -4   10.24    0.91
  -3  17   4   18.74    1.41
  -3  17   4   19.86    1.31
   3  17  -4   17.77    1.03
  -3 -17  -4   16.04    1.23
  -3  17  -4   16.46    1.31
   3 -17  -4   19.86    1.53
  -3 -17   4   16.29    1.37
   3  17   4   19.22    1.49
  -3 -17   4   15.70    1.32
   3  17   4   18.52    1.43
   3 -17  -4   16.97    1.39
   3 -17  -4   20.71    1.38
  -5 -17  -4   42.04    2.26
  -5  17   4   41.94    1.96
   5  17  -4   42.14    1.93
   5  17   4   47.98    2.34
  -5 -17   4   43.28    2.50
  -5  17  -4   40.24    2.46
   5 -17  -4   42.59    2.08
  -5  17  -4   40.38    1.99
   5 -17  -4   46.24    2.06
  -5 -17   4   46.68    2.36
  -7  17   4   26.97    1.69
   7  17  -4   33.82    1.83
  -7 -17  -4   30.05    2.08
  -7  17  -4   30.29    2.38
   7 -17  -4   32.78    1.85
   7  17   4   32.39    2.21
  -7 -17   4   33.43    2.36
   9  17  -4   28.35    1.95
  -9 -17  -4   24.94    2.11
   9 -17  -4   24.61    1.88
   9  17   4   29.55    2.38
  -9  17  -4   24.35    2.13
  -9 -17   4   22.88    1.96
 -11 -17  -4   34.90    2.52
  11  17  -4   31.16    2.37
 -11  17  -4   33.34    2.92
 -11 -17   4   24.80    2.15
  11  17   4   33.67    2.71
  11 -17  -4   30.15    2.28
  13  17  -4    8.13    1.43
 -13 -17  -4    6.90    1.62
 -13 -17   4   10.41    1.81
 -13  17  -4   12.73    2.05
  13 -17  -4    8.68    1.53
  13  17   4   12.96    1.95
 -15 -17  -4   -0.16    1.42
  15 -17   4    1.87    1.33
  15 -17  -4   -1.05    1.57
 -15 -17   4   -1.60    1.46
 -15  17  -4    1.29    1.90
  15  17   4    2.42    1.64
   0 -18   4    2.71    0.71
   0  18   4    1.34    0.67
   0 -18  -4    2.50    0.79
   0 -18   4    1.37    0.75
   0  18   4    2.34    0.73
   0  18  -4    3.45    0.81
   0 -18  -4    1.36    0.55
  -2  18   4    8.12    0.93
  -2 -18  -4    6.60    0.97
  -2  18   4    7.82    0.84
   2  18   4    7.27    0.90
   2 -18  -4    5.90    0.89
  -2 -18   4    6.67    1.04
  -2  18  -4    7.79    0.89
   2  18   4    9.39    1.01
   2 -18  -4    7.03    0.86
  -2 -18   4    5.89    0.96
   2 -18  -4    7.49    0.95
   4  18  -4    1.62    0.56
  -4  18   4    3.37    0.73
  -4 -18  -4    4.09    0.89
  -4 -18   4    2.38    0.92
  -4  18  -4    3.19    0.98
   4  18   4    4.40    0.88
   4 -18  -4    3.70    0.93
   4  18   4    3.98    0.97
  -4  18  -4    2.21    0.74
  -4 -18   4    2.72    1.07
   4 -18  -4    3.58    0.76
   4 -18  -4    3.33    0.80
  -6 -18  -4   14.16    1.35
   6  18  -4   13.31    1.08
   6  18   4   13.83    1.42
   6 -18  -4   11.88    1.12
  -6 -18   4   13.66    1.51
  -6  18  -4   13.96    1.12
  -6  18  -4   13.82    1.52
   8  18  -4   35.53    2.07
  -8 -18  -4   36.55    2.32
   8  18   4   37.32    2.50
  -8 -18   4   36.62    2.58
  -8  18  -4   30.19    2.69
   8 -18  -4   31.45    2.03
 -10 -18  -4   13.05    1.64
  10  18  -4   10.84    1.33
 -10  18  -4   13.29    1.90
  10  18   4   12.60    1.51
 -10 -18   4   12.31    1.67
  10 -18  -4   11.34    1.35
 -12 -18  -4    5.55    1.37
 -12 -18   4   11.46    1.88
  12  18   4    8.24    1.65
  12 -18  -4    3.72    1.33
 -12  18  -4    7.44    1.82
  14 -18   4    5.92    1.30
 -14 -18  -4    5.76    1.57
 -14 -18   4    3.86    1.60
 -14  18  -4    5.05    1.95
  14 -18  -4    3.93    1.61
  14  18   4    4.09    1.68
  16 -18   4    1.85    1.47
  16 -18  -4   -0.16    1.83
  -1  19   4   19.16    1.44
  -1  19   4   21.32    1.57
   1 -19   4   20.95    1.31
  -1 -19  -4   20.91    1.67
   1  19  -4   22.88    1.67
   1 -19   4   18.36    1.42
   1 -19  -4   23.71    1.58
   1 -19  -4   22.87    1.55
   1  19   4   19.93    1.52
  -1 -19   4   21.50    1.50
  -1  19  -4   19.95    1.57
   1 -19  -4   20.97    1.52
   1  19   4   22.20    1.60
  -1 -19   4   17.24    1.37
  -3 -19  -4   27.66    1.84
  -3  19   4   26.68    1.60
   3  19  -4   28.31    1.32
  -3  19   4   24.80    1.76
   3 -19  -4   28.22    1.92
   3 -19  -4   29.89    1.74
  -3  19  -4   30.03    2.04
   3  19   4   27.17    1.85
   3  19   4   28.05    1.84
  -3 -19   4   23.34    1.82
  -3 -19   4   23.28    1.98
   3 -19  -4   30.82    1.80
  -3  19  -4   29.20    1.70
  -5 -19  -4   -0.08    0.90
   5  19  -4    0.11    0.62
   5 -19  -4    0.28    0.78
  -5  19  -4    0.25    0.96
  -5 -19   4   -0.31    1.10
  -5  19  -4    0.47    0.70
   5  19   4    1.75    0.96
  -7 -19  -4    5.41    1.08
   7 -19  -4    4.78    0.98
   7  19   4    6.38    1.24
  -7  19  -4    6.12    1.36
  -7  19  -4    6.53    0.94
  -7 -19   4    4.82    1.30
  -9 -19  -4    1.74    1.07
  -9  19  -4    2.11    1.39
   9  19   4    2.17    1.36
   9 -19  -4    0.12    0.96
  -9 -19   4    3.67    1.40
 -11 -19  -4    0.44    1.17
 -11  19  -4   -1.53    1.51
 -11 -19   4    1.14    1.42
  11 -19  -4   -0.37    1.19
  11  19   4   -1.24    1.48
 -13 -19  -4    5.01    1.49
 -13  19  -4    5.56    1.93
 -13 -19   4    5.24    1.78
  13  19   4    5.23    1.67
  13 -19  -4    6.96    1.58
 -15 -19  -4   11.89    1.95
 -15 -19   4    9.00    1.88
  15  19   4   13.46    2.25
 -15  19  -4   11.09    2.28
  15 -19  -4   13.40    2.03
   0  20   4   11.57    1.09
   0 -20  -4   11.83    1.14
   0  20   4   12.39    1.17
   0 -20   4   14.64    1.06
   0  20  -4   13.01    1.19
   0 -20   4   11.84    1.17
  -2 -20  -4  106.40    4.13
  -2  20   4  103.40    3.99
  -2  20   4  103.02    4.07
   2 -20  -4  114.58    4.11
  -2 -20   4   97.25    4.19
  -2 -20   4  100.22    4.10
   2  20   4  108.85    4.11
  -2  20  -4  107.44    4.03
   2 -20  -4  105.71    4.53
   2  20   4  112.81    4.17
  -4 -20  -4    4.54    0.98
  -4  20   4    4.89    1.02
   4  20   4    5.23    1.06
   4  20   4    5.27    1.02
   4 -20  -4    6.54    1.07
  -4 -20   4    4.29    1.20
  -4  20  -4    4.48    1.12
  -4  20  -4    5.75    0.94
   4 -20  -4    3.61    0.90
  -6 -20  -4    0.13    0.99
   6 -20  -4    1.81    0.90
  -6  20  -4    1.27    0.78
   6  20   4    1.95    1.07
  -6  20  -4    1.25    1.13
  -6 -20   4    1.84    1.21
  -8 -20  -4   15.10    1.48
   8  20   4   15.43    1.59
   8 -20  -4   14.32    1.34
  -8 -20   4   12.77    1.76
  -8  20  -4   15.36    1.90
  -8  20  -4   13.73    1.25
 -10 -20  -4    1.23    1.14
  10  20   4   -0.47    1.29
 -10  20  -4    0.53    1.51
 -10 -20   4    3.25    1.61
  10 -20  -4    1.61    1.09
 -12 -20  -4    8.35    1.57
  12 -20  -4    8.43    1.58
 -12 -20   4    9.72    1.76
 -12  20  -4    5.39    1.93
  12  20   4    9.62    1.84
 -14 -20  -4    5.51    1.83
 -14  20  -4    2.51    1.94
  14  20   4    8.49    2.03
  14 -20  -4    5.90    1.76
 -14 -20   4    6.93    2.01
  -1  21   4   54.73    2.56
  -1 -21  -4   54.53    2.60
  -1  21   4   52.32    2.41
   1 -21   4   51.06    2.39
   1 -21   4   54.58    2.23
   1  21  -4   51.99    2.55
   1  21   4   53.66    2.55
   1 -21  -4   54.37    2.53
   1 -21  -4   50.38    2.56
  -1 -21   4   49.20    2.62
   1  21   4   51.99    2.54
  -1 -21   4   51.81    2.44
  -1  21  -4   53.20    2.53
  -3  21   4    3.41    0.99
  -3 -21  -4    6.86    1.06
  -3  21  -4    7.24    1.04
   3 -21  -4    6.57    1.04
   3 -21  -4    4.36    1.00
   3  21   4    5.86    1.08
  -3  21  -4    6.98    1.20
  -3 -21   4    6.65    1.22
   3  21   4    4.43    1.07
  -5 -21  -4    3.91    1.12
  -5  21  -4    1.63    1.18
   5 -21  -4    3.31    0.95
   5  21   4    1.42    1.05
  -5  21  -4    2.05    0.85
  -5 -21   4    2.07    1.24
  -7 -21  -4    6.01    1.22
  -7  21  -4    4.52    1.40
   7  21   4    4.32    1.25
   7 -21  -4    4.05    1.05
  -7 -21   4    3.79    1.42
  -7  21  -4    3.50    0.94
  -9 -21  -4    1.07    1.13
  -9 -21   4    1.28    1.41
   9 -21  -4   -0.05    1.05
  -9  21  -4   -0.09    1.48
   9  21   4    0.22    1.31
  -9  21  -4    0.34    0.93
 -11 -21  -4    5.18    1.64
 -11  21  -4    8.30    1.88
  11 -21  -4    8.29    1.40
  11  21   4    6.22    1.62
 -11 -21   4    6.11    1.81
 -13 -21  -4    2.23    1.50
 -13 -21   4    1.73    1.56
 -13  21  -4    1.40    1.84
  13 -21  -4    2.86    1.49
  13  21   4    0.95    1.62
   0 -22   4    1.00    0.76
   0  22  -4   -2.10    0.97
   0  22   4   -0.33    0.94
   0 -22  -4    1.20    0.94
   0 -22   4   -1.03    0.94
  -2  22   4   98.52    4.07
  -2 -22  -4  102.33    4.12
   2  22   4  105.06    4.10
   2 -22  -4  101.00    4.44
  -2  22  -4  106.02    4.65
  -2 -22   4   95.88    4.20
   2  22   4  108.01    4.21
   2 -22  -4  103.09    4.05
  -2  22  -4  103.87    4.03
  -4  22   4    6.93    1.17
  -4 -22  -4    4.93    1.17
  -4  22  -4    5.13    1.05
   4  22   4    4.89    1.22
  -4 -22   4    6.38    1.32
  -4  22  -4    7.51    1.39
   4  22   4    6.93    1.20
  -6 -22  -4    2.30    1.09
  -6  22  -4    0.42    1.28
  -6  22  -4   -0.48    0.86
  -6 -22   4    1.12    1.31
   6  22   4   -0.54    1.22
   6 -22  -4    0.96    0.97
  -8 -22  -4   10.73    1.49
   8 -22  -4   12.09    1.36
  -8  22  -4   13.76    1.32
  -8  22  -4   11.47    1.80
  -8 -22   4   11.47    1.77
   8  22   4    9.01    1.48
 -10 -22  -4    3.21    1.30
  10 -22  -4    3.61    1.29
 -10  22  -4    3.69    1.79
 -10 -22   4    4.84    1.75
  10  22   4    2.65    1.50
 -10  22  -4    4.09    1.14
 -12 -22  -4    4.22    1.55
 -12 -22   4    6.19    1.75
 -12  22  -4    3.10    1.98
  12 -22  -4    6.89    1.52
  14 -22  -4    8.44    1.83
  -1 -23  -4   57.92    2.79
  -1  23   4   58.93    2.82
   1 -23   4   52.72    2.62
   1  23  -4   56.03    2.82
  -1 -23   4   52.41    2.83
  -1  23  -4   56.63    3.04
   1 -23  -4   56.52    2.73
   1  23   4   59.95    2.82
  -1  23  -4   55.39    2.74
  -3  23   4   41.34    2.35
  -3 -23  -4   37.85    2.41
  -3  23  -4   39.20    2.23
  -3 -23   4   38.55    2.60
  -3  23  -4   36.57    2.75
   3 -23  -4   41.37    2.30
   3  23   4   38.63    2.42
  -5  23   4    7.91    1.29
  -5 -23  -4    7.02    1.32
  -5  23  -4    5.49    1.50
  -5  23  -4    6.13    1.08
  -5 -23   4    8.50    1.49
  -7 -23  -4    1.45    1.17
  -7  23  -4    1.71    0.97
  -7 -23   4    2.86    1.48
  -7  23  -4    3.51    1.54
   7 -23  -4    0.86    1.06
  -9 -23  -4    4.73    1.35
  -9  23  -4    4.08    1.10
  -9  23  -4    4.57    1.71
  -9 -23   4    3.82    1.69
   9 -23  -4    3.27    1.26
 -11 -23  -4    4.23    1.67
 -11  23  -4    1.70    1.91
  11 -23  -4    3.99    1.40
 -11 -23   4    1.05    1.64
 -13 -23  -4    0.28    1.73
  13 -23  -4    2.41    1.64
 -13 -23   4    2.03    1.75
 -13  23  -4    0.22    2.07
   0 -24   4   39.27    2.38
   0  24   4   38.54    2.40
   0 -24  -4   38.25    2.39
   0  24  -4   40.48    2.52
   0  24  -4   42.43    2.50
   2  24  -4   33.52    2.11
  -2  24   4   35.93    2.33
  -2 -24  -4   34.46    2.34
   2  24   4   32.55    2.40
  -2  24  -4   39.25    2.27
  -2  24  -4   32.54    2.57
   2 -24  -4   35.56    2.22
  -2 -24   4   31.99    2.47
  -4 -24  -4    8.35    1.38
  -4  24   4   10.87    1.43
   4 -24  -4    9.18    1.31
  -4  24  -4   10.13    1.21
   4  24   4    8.74    1.40
  -4  24  -4   11.14    1.66
  -4 -24   4    8.35    1.51
  -6  24   4    3.06    1.22
  -6 -24  -4    2.23    1.21
   6 -24  -4    0.45    1.06
  -6  24  -4    1.59    1.01
  -6 -24   4    2.12    1.45
  -6  24  -4    1.98    1.44
  -8 -24  -4    5.97    1.45
   8 -24  -4    5.22    1.30
  -8  24  -4    4.40    1.12
  -8 -24   4    3.64    1.57
  -8  24  -4    3.71    1.64
 -10 -24  -4    0.70    1.53
 -10 -24   4   -0.11    1.58
 -10  24  -4   -1.48    1.78
 -10  24  -4    1.97    1.16
  10 -24  -4    0.38    1.31
 -12 -24  -4    3.91    1.67
 -12 -24   4    4.92    1.82
 -12  24  -4    2.45    1.27
 -12  24  -4    2.57    2.01
  12 -24  -4    3.26    1.56
  -1  25   4   33.67    2.35
   1  25  -4   34.60    2.49
  -1 -25  -4   32.92    2.33
   1  25  -4   31.14    2.29
   1  25   4   32.95    2.41
  -1  25  -4   31.40    2.26
  -1  25  -4   34.10    2.46
   1 -25  -4   35.79    2.35
  -1 -25   4   27.03    2.02
  -3 -25  -4   28.42    2.35
  -3  25   4   30.90    2.29
  -3 -25   4   22.49    1.99
  -3  25  -4   25.04    2.20
   3 -25  -4   27.83    2.18
   3  25   4   29.04    2.04
  -3  25  -4   34.81    2.21
  -5  25   4    1.28    1.20
  -5 -25  -4    1.33    1.19
  -5  25  -4    3.29    1.52
   5 -25  -4    0.93    1.19
  -5 -25   4    2.69    1.49
  -5  25  -4    1.56    1.05
  -7 -25  -4    2.88    1.32
  -7  25   4    1.46    1.29
  -7  25  -4   -0.43    1.03
   7 -25  -4    2.62    1.22
  -7  25  -4    2.07    1.60
  -7 -25   4    1.98    1.56
  -9 -25  -4    1.76    1.44
  -9 -25   4    3.28    1.79
  -9  25  -4    4.51    1.21
  -9  25  -4    2.42    1.79
   9 -25  -4    3.59    1.36
 -11 -25  -4    3.33    1.53
 -11 -25   4    3.02    1.93
 -11  25  -4    0.03    2.00
  11 -25  -4    2.15    1.54
 -11  25  -4    2.14    1.25
   0 -26  -4   10.08    1.40
   0 -26   4    8.26    1.38
   0  26  -4    9.52    1.47
   0  26   4    9.44    1.41
   0  26  -4    7.95    1.42
  -2 -26  -4   30.88    2.41
  -2  26   4   24.68    1.96
  -2  26  -4   24.18    2.09
  -2  26  -4   30.47    2.29
   2  26   4   28.75    2.08
  -2 -26   4   20.83    1.93
   2 -26  -4   30.18    2.31
  -4  26   4    5.76    1.35
  -4 -26  -4    6.72    1.46
  -4  26  -4    4.12    1.59
  -4  26  -4    4.10    1.17
   4 -26  -4    4.89    1.28
  -4 -26   4    2.85    1.50
  -6 -26  -4    5.52    1.42
  -6  26   4    6.26    1.39
  -6 -26   4    2.84    1.60
  -6  26  -4    3.96    1.65
  -6  26  -4    3.56    1.19
   6 -26  -4    4.25    1.33
  -8  26   4    1.28    1.40
  -8 -26  -4    2.24    1.36
  -8 -26   4    0.60    1.65
  -8  26  -4    2.64    1.75
   8 -26  -4    3.16    1.36
  -8  26  -4    1.05    1.14
 -10 -26  -4    0.93    1.59
 -10 -26   4    4.36    1.82
  10 -26  -4    4.59    1.55
 -10  26  -4    3.00    1.98
 -10  26  -4    3.30    1.28
  -1 -27  -4   19.58    1.73
  -1  27   4   21.84    1.85
  -1 -27   4   18.59    1.80
   1  27   4   19.09    1.79
   1 -27  -4   20.05    1.73
  -1  27  -4   26.51    1.94
  -1  27  -4   18.96    1.93
  -3  27   4    2.38    1.27
  -3 -27  -4    1.95    1.29
   3  27   4    3.05    1.38
  -3  27  -4    2.18    1.48
  -3  27  -4    2.38    1.24
   3 -27  -4    2.71    1.28
  -3 -27   4   -0.52    1.43
  -5  27   4    3.87    1.32
  -5 -27  -4    0.67    1.34
  -5  27  -4    1.60    1.62
  -5  27  -4    2.87    1.16
   5 -27  -4    2.67    1.35
  -5 -27   4    3.28    1.63
  -7 -27  -4    9.52    1.62
  -7  27   4    9.83    1.61
  -7  27  -4    6.23    1.92
  -7  27  -4    7.26    1.39
   7 -27  -4   10.60    1.61
  -7 -27   4   10.53    1.96
  -9  27   4    1.95    1.54
  -9 -27  -4    3.86    1.46
  -9  27  -4    2.74    1.25
  -9  27  -4    2.08    1.87
   9 -27  -4    4.52    1.53
  -9 -27   4   -0.61    1.78
   0 -28   4    0.95    1.34
   0 -28  -4    3.13    1.34
   0  28  -4    2.38    1.39
   0  28   4    1.43    1.31
  -2 -28  -4    9.22    1.52
  -2  28   4   11.42    1.61
  -2  28  -4    9.00    1.47
   2 -28  -4    9.57    1.52
  -2 -28   4    6.65    1.59
   2  28   4    7.44    1.61
  -4 -28  -4   -0.75    1.33
  -4  28   4    0.16    1.28
  -4 -28   4    2.00    1.58
  -4  28  -4    1.62    1.61
  -4  28  -4    0.61    1.26
   4 -28  -4    1.51    1.35
  -6  28   4    4.93    1.50
  -6 -28  -4    2.41    1.54
  -6  28  -4    3.03    1.83
  -6  28  -4    2.76    1.29
  -6 -28   4    4.58    1.77
   6 -28  -4    3.88    1.50
  -8  28   4    0.89    1.53
  -8 -28  -4    3.48    1.49
  -8  28  -4    3.42    1.91
  -8  28  -4    2.89    1.29
  -8 -28   4    3.44    1.83
  -1 -29  -4    1.44    1.40
  -1  29   4    1.43    1.39
   1 -29  -4    0.51    1.38
  -1  29  -4    1.83    1.41
  -1 -29   4   -0.74    1.44
   1  29   4   -0.97    1.37
  -3  29   4    1.54    1.36
  -3 -29  -4    1.45    1.41
  -3  29  -4    1.80    1.32
   3 -29  -4    1.08    1.44
  -3 -29   4   -1.96    1.53
   3  29   4    2.64    1.61
  -5 -29  -4    0.81    1.51
  -5  29   4    3.37    1.51
  -5  29  -4    0.29    1.29
   5 -29  -4    0.07    1.47
  -5 -29   4    0.40    1.70
  -7 -29  -4    9.19    1.70
  -7  29   4   14.80    1.91
  -7 -29   4   10.98    2.13
   7 -29  -4   13.53    1.83
  -7  29  -4   12.26    1.63
  -7  29  -4   10.27    2.16
   0 -30   4   -2.09    1.39
   0  30   4   -1.16    1.43
   0  30  -4    1.34    1.49
   0 -30  -4    1.71    1.48
  -2  30   4    0.48    1.39
  -2 -30  -4    0.47    1.51
  -2 -30   4   -2.80    1.57
  -2  30  -4    1.31    1.49
   2  30   4    1.58    1.61
   2 -30  -4    0.37    1.48
  -4 -30  -4    4.47    1.64
  -4  30   4    5.86    1.62
   4 -30  -4    8.02    1.71
  -4  30  -4    6.92    1.50
  -4 -30   4    5.98    1.86
  -6  30   4   10.27    1.77
  -6 -30  -4    9.28    1.77
  -6 -30   4    7.85    2.05
   6 -30  -4   10.22    1.81
  -6  30  -4    9.53    1.55
  -1  31   4    0.01    1.48
  -1 -31  -4    1.54    1.58
  -1  31  -4    0.17    1.55
  -1 -31   4   -0.39    1.58
   1 -31  -4   -0.54    1.50
   1  31   4    2.69    1.71
  -3  31   4    4.99    1.61
  -3 -31  -4    4.02    1.60
   3 -31  -4    4.06    1.62
   3  31   4    3.89    1.72
  -3 -31   4    4.46    1.87
  -3  31  -4    1.01    1.46
   0   0   5    0.15    0.34
   0   0   5    0.40    0.34
   0   0  -5   -0.09    0.31
   2   0   5    0.32    0.35
   2   0  -5    0.47    0.36
   2   0   5    0.66    0.40
  -2   0  -5    0.75    0.34
  -2   0   5    0.79    0.42
   4   0   5  192.41    6.76
  -4   0   5  198.55    6.84
   4   0   5  201.11    6.76
   4   0  -5  200.14    6.80
  -4   0  -5  194.01    6.73
  -6   0   5   62.51    2.51
  -6   0  -5   59.56    2.32
   6   0  -5   60.57    2.43
   6   0   5   60.38    2.38
   6   0   5   60.39    2.36
   8   0   5   15.93    1.15
   8   0  -5   14.74    1.10
   8   0   5   16.10    1.10
  -8   0  -5   17.58    1.16
  -8   0   5   19.26    1.46
  10   0  -5    0.94    0.78
 -10   0   5    1.42    0.86
 -10   0  -5    1.13    0.64
  10   0   5    2.02    0.73
 -10   0  -5    2.42    0.81
  12   0   5    1.46    0.94
  12   0  -5   -0.88    0.96
 -12   0  -5    1.38    0.82
 -12   0  -5    0.68    0.94
 -12   0   5    1.91    0.99
 -14   0   5   40.50    2.71
  14   0  -5   40.13    2.82
 -14   0  -5   38.24    2.79
  14   0   5   41.48    2.64
  16   0  -5    3.81    1.50
 -16   0  -5    2.33    1.38
 -16   0   5    5.36    1.46
  16   0   5    3.23    1.43
  18   0  -5    4.72    1.87
  18   0   5    4.43    1.76
 -18   0  -5    2.04    1.53
   1  -1   5   67.36    2.39
  -1   1   5   63.54    2.44
   1   1  -5   65.19    2.39
   1  -1   5   63.36    2.40
  -1  -1  -5   64.39    2.39
   1  -1  -5   66.18    2.41
  -1   1  -5   64.56    2.36
   1   1   5   62.98    2.42
   1   1   5   66.15    2.40
  -1  -1   5   67.21    2.41
  -1  -1   5   64.03    2.42
   3  -1   5  299.82   10.49
  -3  -1  -5  306.89   10.49
   3  -1   5  326.60   10.51
  -3   1   5  309.92   10.55
   3   1  -5  311.74   10.53
   3   1   5  300.38   10.51
   3  -1  -5  305.81   10.53
  -3   1  -5  309.74   10.47
   3   1   5  328.34   10.54
   5  -1   5   95.99    3.36
  -5  -1  -5   92.42    3.36
   5   1  -5   91.27    3.44
  -5   1   5   91.88    3.49
   5  -1   5   89.52    3.38
  -5  -1   5   93.16    3.50
   5   1   5   91.92    3.41
   5   1   5   98.83    3.40
   5  -1  -5   96.70    3.46
  -5   1  -5   94.12    3.34
   7  -1   5   21.72    1.29
   7  -1   5   22.61    1.22
   7   1  -5   23.19    1.39
  -7   1   5   23.33    1.46
  -7  -1  -5   23.98    1.26
   7  -1  -5   22.49    1.40
   7   1   5   22.12    1.33
  -7   1  -5   22.17    1.21
  -7  -1   5   22.18    1.52
   7   1   5   23.09    1.25
  -9   1   5    4.51    0.86
   9   1  -5    4.80    0.89
  -9  -1  -5    4.28    0.71
   9  -1   5    4.23    0.71
   9  -1   5    6.04    0.73
   9   1   5    3.86    0.74
  -9  -1   5    4.72    0.94
   9  -1  -5    5.18    0.83
  -9   1  -5    3.37    0.65
  11  -1   5   13.94    1.19
  11   1  -5   15.45    1.43
 -11  -1  -5   15.47    1.41
 -11  -1  -5   15.28    1.23
 -11   1   5   14.75    1.34
 -11  -1   5   14.84    1.39
 -11   1  -5   13.74    1.35
  11   1   5   13.59    1.20
 -11   1  -5   17.21    1.25
  11  -1  -5   18.42    1.47
 -13  -1  -5   27.31    2.29
  13   1  -5   29.03    2.34
  13  -1   5   26.29    2.08
 -13  -1  -5   25.19    1.95
 -13   1   5   27.47    2.26
  13   1   5   27.52    2.12
 -13  -1   5   29.23    2.32
 -13   1  -5   27.29    2.34
  13  -1  -5   28.97    2.13
 -15   1   5   27.25    2.17
  15  -1   5   24.67    2.04
 -15  -1  -5   27.06    2.58
  15   1  -5   26.10    2.12
 -15  -1   5   26.71    2.07
  15  -1  -5   27.02    2.21
 -15   1  -5   24.88    2.23
  15   1   5   26.10    2.04
  17  -1   5    7.47    1.70
 -17  -1  -5    6.27    1.65
  17   1  -5    5.65    1.70
 -17  -1   5    5.73    1.54
 -17   1  -5    3.81    1.58
  17  -1  -5    6.23    1.81
  17   1   5    5.77    1.57
  19   1  -5   20.15    2.36
  19  -1  -5   18.13    2.31
   0  -2   5    3.06    0.45
   0  -2   5    3.03    0.40
   0  -2  -5    3.71    0.47
   0   2   5    2.32    0.46
   0   2  -5    3.29    0.42
   2  -2   5   94.25    3.41
   2  -2   5   99.01    3.40
  -2  -2  -5   95.60    3.42
   2   2  -5   97.39    3.43
  -2   2  -5   93.12    3.37
  -2  -2   5   95.38    3.47
   2   2   5   92.99    3.45
   2   2   5  101.83    3.46
  -2  -2   5   97.03    3.44
   2  -2  -5   97.31    3.45
   4  -2   5  152.46    5.46
  -4  -2  -5  154.23    5.47
   4   2  -5  163.23    5.52
   4   2   5  152.62    5.51
  -4  -2   5  159.70    5.57
   4  -2  -5  161.97    5.53
   4   2   5  163.40    5.51
  -4   2  -5  159.59    5.43
   6  -2   5   14.99    1.00
   6   2  -5   16.59    1.13
  -6  -2  -5   16.11    1.02
  -6   2   5   16.57    1.21
   6  -2   5   16.13    0.97
   6   2   5   15.67    1.12
  -6  -2   5   15.81    1.28
  -6   2  -5   16.06    0.94
   6  -2  -5   16.14    1.18
   8  -2   5   26.83    1.45
  -8  -2  -5   25.58    1.43
  -8   2   5   25.10    1.61
   8  -2   5   25.31    1.34
   8   2  -5   27.55    1.59
   8   2   5   26.08    1.52
  -8  -2   5   26.57    1.72
   8  -2  -5   26.84    1.58
  -8   2  -5   24.91    1.32
 -10  -2  -5    0.60    0.77
  10   2  -5    1.28    0.85
  10  -2   5    1.14    0.66
 -10   2   5   -0.10    0.76
  10  -2   5    0.00    0.56
 -10  -2  -5    1.25    0.69
 -10   2  -5    1.53    0.86
  10   2   5    1.57    0.81
 -10   2  -5    0.15    0.61
 -10  -2   5    1.32    0.83
  10  -2  -5    0.61    0.82
 -12  -2  -5   11.87    1.38
 -12  -2  -5   14.72    1.30
  12   2  -5   14.62    1.49
  12  -2   5    9.51    1.19
 -12   2   5   10.05    1.28
  12   2   5   11.71    1.29
 -12  -2   5   12.30    1.36
 -12   2  -5   10.53    1.36
 -12   2  -5   13.54    1.20
  12  -2  -5   13.28    1.36
  14  -2   5   16.58    1.61
  14   2  -5   18.41    1.79
 -14   2   5   18.27    1.69
 -14  -2  -5   21.38    1.90
 -14  -2   5   18.37    1.88
  14   2   5   17.42    1.70
  14  -2  -5   18.74    1.77
 -14   2  -5   21.18    2.06
  16  -2   5    2.62    1.33
  16   2  -5    4.62    1.60
 -16  -2  -5    5.11    1.43
  16   2   5    0.37    1.42
 -16   2  -5    3.26    1.49
  16  -2  -5    2.45    1.48
 -16  -2   5    3.73    1.39
  18  -2   5    3.86    1.70
 -18  -2  -5    3.08    1.53
  18   2  -5    3.84    1.76
 -18   2  -5    2.10    1.62
  18   2   5    3.12    1.80
  18  -2  -5    2.76    1.73
  -1  -3  -5   66.14    2.48
   1   3  -5   70.18    2.45
   1  -3   5   66.86    2.46
   1  -3   5   67.47    2.43
   1  -3  -5   67.04    2.49
  -1  -3   5   66.08    2.49
  -1   3  -5   66.24    2.40
   1   3   5   66.19    2.51
  -1  -3   5   66.84    2.46
   3   3  -5  230.87    7.67
  -3   3   5  219.47    7.70
   3  -3   5  211.38    7.61
   3  -3   5  232.48    7.63
  -3  -3  -5  222.76    7.66
   3   3   5  222.20    7.69
  -3  -3   5  221.11    7.71
  -3   3  -5  220.17    7.58
  -3  -3   5  230.96    7.69
   3  -3  -5  234.59    7.70
  -5   3   5   18.57    1.20
  -5  -3  -5   18.01    0.85
   5   3  -5   19.00    1.13
   5  -3   5   18.36    0.94
  -5  -3  -5   18.79    1.04
   5  -3   5   18.47    1.02
  -5  -3   5   20.65    1.31
   5   3   5   17.44    1.11
   5  -3  -5   19.49    1.17
  -5   3  -5   19.24    0.93
   7  -3   5   39.67    1.74
  -7   3   5   40.83    1.90
  -7  -3  -5   38.73    1.76
   7   3  -5   39.32    1.85
   7  -3   5   41.25    1.69
  -7   3  -5   38.14    1.65
   7   3   5   39.36    1.84
  -7  -3   5   39.93    2.02
   7  -3  -5   38.99    1.87
   9  -3   5    4.57    0.70
  -9  -3  -5    4.51    0.75
   9   3  -5    2.66    0.77
   9  -3   5    4.09    0.63
  -9   3   5    3.39    0.84
   9  -3  -5    5.19    0.84
  -9   3  -5    4.77    0.71
   9   3   5    2.80    0.70
  -9  -3   5    4.28    0.96
  11  -3   5   34.51    1.97
  11  -3   5   38.66    1.93
 -11  -3  -5   37.45    2.01
 -11   3   5   33.75    2.16
 -11  -3  -5   35.99    2.25
  11   3  -5   34.32    2.22
 -11   3  -5   37.88    2.29
 -11  -3   5   34.37    2.33
 -11   3  -5   35.71    1.89
  11  -3  -5   34.67    2.17
  11   3   5   34.45    2.09
 -13  -3  -5   51.45    2.92
 -13   3   5   51.98    2.81
  13  -3   5   47.87    2.63
  13   3  -5   51.20    2.88
 -13  -3  -5   52.04    2.65
 -13   3  -5   47.35    3.00
 -13  -3   5   50.82    2.92
  13   3   5   47.66    2.74
  13  -3  -5   47.80    2.85
 -15   3   5   71.90    3.51
  15   3  -5   70.12    3.71
  15  -3   5   65.17    3.45
 -15  -3  -5   73.69    3.84
  15   3   5   66.44    3.64
 -15  -3   5   76.88    3.69
  15  -3  -5   70.47    3.73
 -15   3  -5   63.01    3.91
  17  -3   5   16.99    1.92
 -17  -3  -5   14.53    1.91
  17   3  -5   15.98    1.96
 -17   3  -5   14.47    2.02
 -17  -3   5   16.79    1.99
  17  -3  -5   13.30    2.02
  17   3   5   17.66    2.09
  19   3  -5   31.96    2.70
  19  -3  -5   28.29    2.69
   0  -4   5    2.15    0.38
   0  -4  -5    3.07    0.49
   0  -4   5    2.62    0.43
   0   4   5    3.73    0.53
   0   4  -5    2.77    0.36
  -2  -4  -5  144.38    4.96
   2  -4   5  142.64    4.89
   2  -4   5  136.16    4.89
  -2   4   5  140.33    4.99
   2   4  -5  145.88    4.93
  -2  -4   5  145.28    4.95
   2   4   5  144.44    4.99
   2  -4  -5  144.56    4.98
  -2  -4   5  142.35    4.98
  -2   4  -5  137.63    4.86
   4  -4   5   48.15    1.96
   4   4  -5   52.02    2.06
  -4   4   5   49.70    2.10
  -4  -4  -5   53.63    1.85
  -4  -4  -5   52.16    2.05
   4   4   5   52.72    2.10
  -4   4  -5   50.05    1.90
  -4  -4   5   55.69    2.18
   4  -4  -5   55.08    2.11
   6  -4   5   12.36    0.90
  -6  -4  -5   12.74    1.02
   6  -4   5   13.25    0.84
   6   4  -5   13.26    1.05
  -6   4   5   12.46    0.97
   6   4   5   14.00    1.01
   6  -4  -5   13.95    1.11
  -6  -4   5   13.47    1.06
  -6   4  -5   12.84    0.84
  -8  -4  -5   23.81    1.41
  -8   4   5   20.43    1.46
   8  -4   5   23.18    1.21
   8  -4   5   21.74    1.31
   8   4  -5   20.91    1.49
  -8   4  -5   22.98    1.23
  -8  -4   5   20.84    1.69
   8  -4  -5   23.26    1.49
   8   4   5   20.66    1.45
  10  -4   5   27.19    1.55
 -10  -4  -5   32.05    1.76
  10   4  -5   30.75    1.91
 -10   4   5   24.96    1.80
  10  -4   5   25.30    1.60
 -10  -4  -5   29.24    1.87
 -10   4  -5   28.37    1.55
 -10  -4   5   25.97    2.04
  10   4   5   24.85    1.76
 -10   4  -5   26.97    1.95
  10  -4  -5   25.60    1.83
 -12  -4  -5   18.67    1.44
 -12  -4  -5   15.33    1.48
 -12   4   5   13.96    1.37
  12   4  -5   14.97    1.44
  12  -4   5   13.51    1.31
 -12   4  -5   15.91    1.64
  12  -4  -5   14.14    1.53
  12   4   5   14.15    1.37
 -12  -4   5   16.64    1.69
  14   4  -5    0.01    1.15
 -14  -4  -5    0.90    1.14
  14  -4   5    2.03    1.16
 -14   4   5    0.49    1.05
 -14  -4  -5    3.25    1.09
  14   4   5    0.86    1.19
 -14  -4   5    1.44    1.25
 -14   4  -5    0.71    1.30
  14  -4  -5    1.89    1.21
  16  -4   5    6.02    1.47
  16   4  -5    5.88    1.56
 -16  -4  -5    6.25    1.50
  16   4   5    5.99    1.59
 -16  -4   5    5.85    1.45
 -16   4  -5    6.58    1.73
  16  -4  -5    6.73    1.68
  18   4  -5    1.15    1.66
  18  -4   5    1.49    1.62
 -18  -4   5    0.34    1.48
  18  -4  -5    0.99    1.62
  18   4   5   -2.40    1.67
 -18   4  -5    2.35    1.63
   1  -5   5  150.63    5.08
   1   5  -5  150.92    5.09
  -1   5   5  151.47    5.19
   1  -5   5  143.32    5.09
  -1  -5   5  152.10    5.12
  -1   5  -5  145.31    5.05
   1   5   5  151.07    5.19
  -1  -5   5  146.22    4.97
  -1  -5   5  143.62    5.13
   1   5   5  145.22    4.94
   1  -5  -5  149.84    5.17
   3   5  -5    8.43    0.64
   3  -5   5    7.91    0.63
  -3  -5  -5    8.45    0.56
  -3   5   5    7.31    0.68
   3  -5   5    8.06    0.67
  -3  -5  -5    7.79    0.69
   3  -5  -5    7.54    0.69
  -3  -5   5    9.20    0.74
  -3   5  -5    7.11    0.53
  -3  -5   5    8.02    0.63
   3   5   5    7.77    0.73
   5   5  -5   21.00    1.15
   5  -5   5   19.90    1.02
  -5   5   5   18.63    1.20
  -5  -5  -5   20.01    0.93
  -5  -5  -5   19.34    1.14
   5  -5   5   19.72    0.96
   5   5   5   19.42    1.20
  -5  -5   5   20.86    1.39
   5  -5  -5   20.64    1.22
  -5   5  -5   18.65    0.92
   7   5  -5   14.99    1.21
   7  -5   5   15.13    1.04
   7  -5   5   15.33    0.93
  -7  -5  -5   13.57    1.12
  -7   5   5   14.76    1.20
  -7  -5   5   15.04    1.21
  -7   5  -5   13.85    0.93
   7   5   5   15.34    1.14
   7  -5  -5   14.91    1.25
   9  -5   5   48.04    2.05
  -9   5   5   47.46    2.21
  -9  -5  -5   46.68    2.16
   9   5  -5   44.04    2.26
   9  -5   5   44.60    1.98
  -9  -5   5   44.15    2.46
  -9   5  -5   48.19    1.99
   9   5   5   45.57    2.23
   9  -5  -5   44.76    2.22
 -11  -5  -5   26.28    1.82
 -11  -5  -5   26.16    1.94
 -11   5   5   24.13    1.86
  11  -5   5   23.64    1.69
  11  -5   5   25.66    1.57
  11   5  -5   26.52    1.97
 -11   5  -5   26.99    1.57
 -11   5  -5   27.81    2.07
  11   5   5   22.60    1.92
 -11  -5   5   29.43    2.23
  11  -5  -5   26.22    1.97
 -13   5   5   16.47    1.52
 -13  -5  -5   17.93    1.65
  13  -5   5   14.63    1.48
  13   5  -5   16.47    1.59
 -13  -5  -5   16.39    1.53
  13   5   5   15.54    1.59
 -13   5  -5   16.96    1.78
 -13  -5   5   17.75    1.70
  13  -5  -5   17.13    1.66
  15  -5   5   10.16    1.48
  15   5  -5   13.34    1.61
 -15  -5  -5   13.55    1.63
  15  -5  -5   11.33    1.63
 -15   5  -5    9.63    1.69
  15   5   5   12.27    1.70
 -15  -5   5    9.94    1.60
  17  -5   5   37.96    2.86
 -17  -5  -5   34.49    2.90
  17   5  -5   35.98    2.78
 -17   5  -5   30.88    2.83
  17   5   5   33.40    2.62
 -17  -5   5   37.82    3.04
  17  -5  -5   39.22    3.23
   0  -6  -5  127.44    4.41
   0   6  -5  121.15    4.28
   0  -6   5  124.69    4.32
   0  -6   5  120.53    4.34
   0  -6   5  124.62    4.20
   0   6   5  130.08    4.44
   2   6  -5   96.86    3.28
   2  -6   5   88.51    3.23
  -2   6   5   94.33    3.37
   2  -6   5   91.75    3.22
   2  -6  -5   94.96    3.36
  -2   6  -5   89.73    3.17
  -2  -6   5   94.04    3.30
  -2  -6   5   91.65    3.35
  -2   6  -5   87.96    3.12
   2   6   5   93.42    3.38
   2   6   5   89.63    3.15
  -4   6   5   55.13    2.26
  -4  -6  -5   57.07    2.24
   4  -6   5   54.51    2.09
   4   6  -5   57.40    2.21
  -4  -6  -5   58.16    2.05
   4  -6   5   57.17    2.08
   4  -6  -5   56.43    2.27
  -4  -6   5   60.39    2.38
   4   6   5   53.38    2.28
  -4  -6   5   56.87    2.25
   6  -6   5   37.10    1.61
  -6  -6  -5   41.80    1.79
   6   6  -5   38.55    1.78
   6  -6   5   38.29    1.58
  -6  -6  -5   40.27    1.58
  -6   6   5   39.87    1.82
   6   6   5   39.91    1.86
  -6  -6   5   40.57    2.03
   6  -6  -5   40.40    1.83
   8   6  -5    0.67    0.64
  -8   6   5   -0.28    0.61
   8  -6   5    0.32    0.43
   8  -6   5    0.51    0.52
  -8  -6  -5    0.35    0.56
  -8  -6   5   -0.28    0.83
   8  -6  -5    1.19    0.68
  -8   6  -5    0.16    0.45
   8   6   5    1.01    0.65
 -10  -6  -5   16.61    1.32
 -10  -6  -5   15.96    1.31
  10   6  -5   15.43    1.34
 -10   6   5   16.25    1.34
  10  -6   5   15.33    1.12
  10  -6   5   14.48    1.20
 -10   6  -5   16.08    1.17
  10  -6  -5   11.93    1.20
 -10   6  -5   12.98    1.32
  10   6   5   14.33    1.28
 -10  -6   5   14.05    1.48
 -12   6   5   11.56    1.28
 -12  -6  -5   12.79    1.36
 -12  -6  -5   13.40    1.36
  12   6  -5   14.38    1.48
  12  -6   5   10.49    1.19
  12  -6  -5   12.37    1.48
 -12   6  -5   12.28    1.46
  12   6   5   11.80    1.43
 -12  -6   5    9.83    1.42
  14  -6   5    8.26    1.27
  14   6  -5    5.38    1.34
 -14  -6  -5    6.80    1.35
 -14  -6  -5    9.00    1.37
 -14   6   5    6.16    1.23
 -14   6  -5    5.52    1.42
 -14  -6   5    9.11    1.59
  14  -6  -5    7.89    1.56
  14   6   5    6.18    1.39
 -16  -6  -5   28.12    2.60
  16   6  -5   26.01    2.27
  16  -6   5   25.77    2.05
  16   6   5   27.12    2.48
 -16  -6   5   26.36    2.28
  16  -6  -5   26.21    2.35
 -16   6  -5   26.23    2.54
  18   6  -5   19.19    2.27
  18  -6   5   22.29    2.14
 -18  -6   5   18.57    2.27
 -18   6  -5   18.37    2.37
  18   6   5   19.27    2.29
  18  -6  -5   20.45    2.42
  -1   7   5  171.11    5.83
   1  -7   5  168.03    5.69
  -1  -7  -5  166.04    5.80
   1  -7   5  158.81    5.70
   1   7  -5  170.61    5.70
   1   7   5  168.32    5.83
  -1  -7   5  170.44    5.74
  -1   7  -5  157.27    5.58
   1   7   5  167.96    5.61
  -1  -7   5  163.34    5.76
   1  -7  -5  171.19    5.82
  -1   7  -5  166.04    5.64
  -1  -7   5  172.40    5.62
   3  -7   5  166.92    5.91
  -3   7   5  173.03    6.07
   3  -7   5  169.23    5.92
   3   7  -5  175.88    6.00
  -3  -7  -5  174.85    6.06
  -3  -7   5  178.89    6.11
  -3  -7   5  177.79    6.04
   3  -7  -5  176.48    6.07
  -3   7  -5  171.24    5.81
   3   7   5  178.94    6.10
  -5  -7  -5    9.10    0.76
  -5   7   5   10.62    0.86
  -5  -7  -5   11.15    0.75
   5   7  -5   11.08    0.81
   5  -7   5    9.68    0.75
   5  -7   5   10.69    0.68
   5   7   5   10.86    0.87
  -5  -7   5   11.00    1.01
   5  -7  -5    9.33    0.82
  -7  -7  -5   10.12    0.75
   7   7  -5   10.51    0.94
  -7   7   5    9.76    0.91
   7  -7   5    9.94    0.80
   7  -7   5   11.26    0.93
  -7  -7  -5   12.40    1.01
   7  -7  -5   12.17    1.00
   7   7   5    9.50    0.92
  -7  -7   5   10.35    1.11
   9   7  -5   16.79    1.37
  -9   7   5   16.28    1.38
   9  -7   5   17.74    1.12
  -9  -7  -5   17.26    1.22
   9  -7   5   16.43    1.21
  -9  -7   5   17.71    1.53
   9  -7  -5   17.15    1.29
   9   7   5   16.30    1.36
  -9   7  -5   15.63    1.38
 -11  -7  -5    6.57    1.06
  11  -7   5    5.34    0.92
 -11   7   5    4.62    0.96
  11  -7   5    6.20    0.83
  11   7  -5    5.65    1.07
 -11  -7  -5    4.02    0.97
  11  -7  -5    2.12    0.99
  11   7   5    5.25    1.05
 -11   7  -5    5.87    1.22
 -11  -7   5    5.02    1.21
  13  -7   5   23.24    1.69
 -13  -7  -5   25.66    2.13
 -13  -7  -5   23.84    1.81
 -13   7   5   25.64    2.04
  13   7  -5   19.32    1.79
  13  -7  -5   22.57    1.82
 -13  -7   5   20.50    1.90
  13   7   5   18.29    1.71
 -13   7  -5   24.76    2.15
 -15  -7  -5   26.00    2.36
  15  -7   5   21.62    1.83
  15   7  -5   23.52    2.01
 -15  -7  -5   18.48    1.81
 -15  -7   5   22.46    2.13
 -15   7  -5   24.26    2.39
  15  -7  -5   21.23    2.17
  15   7   5   20.16    2.03
  17   7  -5    4.55    1.67
  17  -7   5    7.53    1.64
  17  -7  -5    3.88    1.73
  17   7   5    6.40    1.81
 -17  -7   5    5.23    1.59
 -17   7  -5    3.67    1.65
   0  -8   5  217.45    7.76
   0   8   5  226.11    7.86
   0  -8   5  235.23    7.76
   0   8   5  225.38    7.64
   0   8  -5  229.05    7.70
   0  -8   5  234.62    7.63
   0  -8  -5  232.99    7.86
  -2  -8  -5  165.30    5.73
   2  -8   5  154.35    5.58
   2  -8   5  159.48    5.57
  -2   8   5  166.89    5.75
   2   8  -5  164.70    5.63
   2   8   5  165.40    5.76
   2  -8  -5  165.75    5.74
  -2   8  -5  165.95    5.51
  -2  -8   5  172.56    5.69
   2   8   5  163.90    5.53
  -2  -8   5  160.05    5.72
  -4  -8  -5   39.85    1.77
   4  -8   5   39.05    1.55
   4   8  -5   39.33    1.69
  -4  -8  -5   41.29    1.60
  -4   8   5   41.08    1.79
   4  -8   5   39.34    1.54
   4   8   5   40.85    1.84
  -4   8  -5   38.63    1.55
  -4  -8   5   41.26    1.92
  -4  -8   5   43.01    1.78
   4  -8  -5   41.24    1.79
   6   8  -5    1.18    0.53
  -6  -8  -5    0.97    0.53
  -6  -8  -5    1.18    0.43
   6  -8   5    1.30    0.38
   6  -8   5    1.13    0.43
  -6   8   5    1.58    0.62
   6   8   5    1.19    0.66
   6  -8  -5    1.16    0.60
  -6  -8   5    0.64    0.75
   8  -8   5    7.07    0.63
   8  -8   5    7.07    0.71
  -8   8   5    6.90    0.82
  -8  -8  -5    6.85    0.70
   8   8  -5    6.20    0.86
  -8  -8  -5    7.42    0.92
   8  -8  -5    6.97    0.89
  -8  -8   5    5.54    1.05
   8   8   5    5.78    0.85
  10  -8   5   21.08    1.42
  10   8  -5   20.56    1.54
 -10  -8  -5   21.08    1.65
 -10  -8  -5   20.60    1.71
 -10   8   5   21.90    1.60
  10  -8   5   21.53    1.33
  10  -8  -5   21.64    1.56
  10   8   5   17.72    1.40
 -10   8  -5   18.58    1.61
 -10  -8   5   18.49    1.65
 -12  -8  -5    5.03    1.15
 -12   8   5    4.91    1.02
  12   8  -5    4.19    1.10
  12  -8   5    5.98    1.05
 -12  -8  -5    5.34    1.12
  12   8   5    8.11    1.31
  12  -8  -5    5.06    1.17
 -12  -8   5    2.36    1.21
 -12   8  -5    5.97    1.35
 -14  -8  -5    1.42    1.16
  14  -8   5    3.12    1.14
  14   8  -5    1.99    1.24
 -14  -8  -5    4.32    1.34
 -14  -8   5    2.46    1.36
  14  -8  -5    2.37    1.37
  14   8   5    1.16    1.39
 -14   8  -5    2.34    1.35
  16  -8   5   44.32    2.91
  16   8  -5   45.37    3.22
 -16  -8  -5   46.12    3.02
 -16  -8   5   50.15    3.34
 -16   8  -5   49.08    3.50
  16   8   5   43.31    3.35
  16  -8  -5   43.35    3.29
  18  -8   5   39.48    3.09
  18   8  -5   31.72    2.56
  18  -8  -5   35.48    2.83
  18   8   5   33.08    2.78
 -18  -8   5   29.23    2.53
 -18   8  -5   32.34    2.87
   1  -9   5  208.60    7.47
   1  -9   5  215.36    7.46
  -1   9   5  230.69    7.62
   1   9  -5  219.86    7.46
   1   9   5  223.60    7.39
  -1   9  -5  223.46    7.38
   1   9   5  227.88    7.63
  -1  -9   5  215.25    7.54
   1  -9  -5  225.77    7.62
  -1  -9   5  216.94    7.51
   3   9  -5   77.51    2.80
  -3  -9  -5   78.01    2.93
  -3   9   5   77.35    2.91
   3  -9   5   73.31    2.68
   3  -9   5   73.66    2.70
  -3  -9   5   80.11    2.88
   3   9   5   77.68    2.76
   3   9   5   77.84    2.95
  -3  -9   5   77.52    2.97
  -3  -9   5   74.69    2.79
  -3   9  -5   74.49    2.72
   3  -9  -5   77.92    2.93
  -5  -9  -5   30.24    1.55
   5   9  -5   31.77    1.46
  -5   9   5   30.18    1.52
  -5  -9  -5   30.47    1.35
   5  -9   5   29.99    1.27
   5  -9  -5   30.64    1.56
   5   9   5   30.02    1.64
  -5  -9   5   29.25    1.79
  -7   9   5    3.20    0.66
   7  -9   5    3.81    0.56
   7   9  -5    5.01    0.74
  -7  -9  -5    4.80    0.74
  -7  -9  -5    3.94    0.59
   7  -9   5    4.53    0.50
   7   9   5    3.44    0.74
   7  -9  -5    4.26    0.75
  -7  -9   5    3.93    0.98
  -9  -9  -5   52.26    2.39
  -9  -9  -5   51.68    2.45
  -9   9   5   48.00    2.28
  -9  -9  -5   48.75    2.11
   9  -9   5   45.87    2.09
   9   9  -5   49.44    2.40
   9  -9   5   46.95    2.03
   9   9   5   56.50    2.53
  -9   9  -5   46.55    2.66
  -9  -9   5   50.03    2.74
   9  -9  -5   50.66    2.42
 -11  -9  -5    3.13    1.09
  11   9  -5    1.79    0.94
 -11  -9  -5    3.31    0.96
  11  -9   5    1.94    0.84
 -11   9   5    3.05    0.89
  11  -9   5    2.17    0.67
  11  -9  -5    1.09    1.07
  11   9   5    3.15    1.12
 -11   9  -5    2.72    1.21
 -11  -9   5    3.01    1.19
 -13  -9  -5   20.52    1.72
  13  -9   5   16.85    1.50
  13   9  -5   17.70    1.64
 -13  -9  -5   19.77    1.68
 -13  -9   5   21.72    1.89
  13  -9  -5   19.95    1.85
  13   9   5   19.16    1.76
 -13   9  -5   14.92    1.79
  15   9  -5   14.09    1.82
 -15  -9  -5   13.32    1.59
 -15  -9  -5   13.89    1.72
  15  -9   5   14.06    1.55
 -15  -9   5   11.92    1.72
 -15   9  -5   13.28    2.03
  15  -9  -5   12.60    1.90
  15   9   5   11.70    1.81
  17  -9   5   34.52    2.85
  17   9  -5   32.68    2.58
 -17   9  -5   25.51    2.79
  17   9   5   34.09    2.77
  17  -9  -5   29.56    2.79
 -17  -9   5   29.25    2.52
   0 -10   5   -0.12    0.43
   0 -10   5    0.43    0.34
   0  10   5    0.93    0.56
   0  10  -5    0.61    0.25
   0  10   5    0.04    0.42
   0 -10   5    0.58    0.35
   0 -10  -5   -0.37    0.47
   2 -10   5   70.74    2.65
  -2  10   5   76.40    2.86
   2  10  -5   73.68    2.69
   2 -10   5   72.11    2.63
  -2 -10  -5   71.92    2.86
  -2  10  -5   73.20    2.68
   2  10   5   76.39    2.71
   2  10   5   75.79    2.89
  -2 -10   5   76.71    2.73
   2 -10  -5   75.53    2.87
  -2 -10   5   75.46    2.86
  -2 -10   5   78.01    2.79
  -4 -10  -5   16.38    0.98
  -4 -10  -5   16.02    1.20
   4  10  -5   16.69    1.01
  -4  10   5   17.46    1.18
   4  10   5   18.01    1.28
  -4 -10   5   15.88    1.06
  -4  10  -5   15.83    0.95
   4 -10  -5   16.84    1.19
  -4 -10   5   16.80    1.39
  -4 -10   5   17.80    1.16
  -6 -10  -5    6.06    0.83
  -6 -10  -5    7.00    0.67
  -6  10   5    6.43    0.77
   6  10  -5    5.41    0.72
   6  10   5    6.45    0.81
  -6 -10   5    5.63    1.00
   6 -10  -5    4.12    0.74
   8 -10   5   24.08    1.26
  -8 -10  -5   25.34    1.64
   8 -10   5   21.38    1.15
  -8 -10  -5   23.51    1.33
   8  10  -5   24.03    1.58
  -8  10   5   21.94    1.48
  -8 -10   5   22.20    1.73
   8 -10  -5   23.57    1.62
   8  10   5   23.49    1.72
  10  10  -5   13.48    1.35
 -10 -10  -5   15.68    1.43
  10 -10   5   13.17    1.00
 -10 -10  -5   17.28    1.52
 -10  10   5   15.69    1.23
  10 -10   5   16.05    1.34
 -10 -10   5   13.86    1.54
  10 -10  -5   15.61    1.38
 -10  10  -5   16.10    1.62
  10  10   5   14.88    1.42
  12  10  -5   19.28    1.72
 -12  10   5   24.03    1.83
  12 -10   5   23.60    1.83
 -12 -10  -5   22.63    1.84
 -12 -10  -5   23.87    1.98
  12  10   5   22.98    1.90
  12 -10  -5   21.55    1.79
 -12  10  -5   23.60    2.09
 -12 -10   5   21.45    1.87
 -14 -10  -5    6.39    1.27
 -14 -10  -5    7.92    1.45
  14  10  -5    5.60    1.45
  14 -10   5    4.95    1.22
 -14 -10   5    7.99    1.62
  14  10   5    4.97    1.47
  14 -10  -5    5.94    1.45
 -14  10  -5    5.85    1.52
  16  10  -5    5.97    1.55
  16 -10   5    8.31    1.52
 -16 -10   5    7.12    1.61
  16 -10  -5    6.67    1.74
 -16  10  -5    7.05    1.77
  16  10   5    5.55    1.78
  18 -10   5    3.16    1.63
  18  10  -5    3.47    1.65
  18 -10  -5    2.80    2.10
   1 -11   5   80.56    3.12
  -1 -11  -5   85.94    3.30
  -1  11   5   88.65    3.30
   1  11  -5   87.55    3.08
   1 -11   5   90.89    3.12
  -1 -11   5   88.13    3.24
  -1  11  -5   88.32    3.15
   1 -11  -5   90.14    3.32
  -1 -11   5   89.19    3.20
   1  11   5   89.29    3.32
  -1 -11   5   90.87    3.17
   1  11   5   87.09    3.16
  -3 -11  -5   36.18    1.81
   3  11  -5   37.38    1.59
  -3  11   5   38.19    1.78
   3  11   5   41.15    1.67
  -3 -11   5   38.44    1.67
  -3 -11   5   38.00    1.72
  -3 -11   5   37.88    1.90
   3 -11  -5   38.06    1.78
  -3  11  -5   40.01    1.62
   3  11   5   39.43    1.84
   5  11  -5   31.78    1.53
  -5 -11  -5   35.41    1.73
  -5  11   5   31.91    1.63
  -5 -11  -5   34.60    1.50
  -5  11  -5   29.65    1.44
  -5 -11   5   32.22    1.90
   5 -11  -5   30.06    1.67
  -5 -11   5   38.06    1.73
   5  11   5   33.47    1.76
  -5 -11   5   29.73    1.53
  -7 -11  -5    2.08    0.57
   7  11  -5    2.63    0.69
  -7  11   5    2.02    0.65
  -7 -11  -5    1.37    0.71
   7  11   5    2.37    0.77
   7 -11  -5    3.61    0.77
  -7 -11   5    1.42    0.95
   9  11  -5    9.87    1.09
  -9  11   5   12.42    1.11
  -9 -11  -5   13.34    1.25
  -9 -11  -5   11.74    1.05
   9 -11   5   10.27    0.79
   9 -11   5    9.96    0.85
   9  11   5    9.79    1.13
  -9  11  -5   11.36    1.31
   9 -11  -5   11.69    1.17
  -9 -11   5   11.78    1.50
  11 -11   5   10.16    0.94
  11 -11   5   10.13    1.10
 -11  11   5    8.04    1.06
 -11 -11  -5   10.86    1.30
  11  11  -5    8.32    1.21
 -11 -11  -5   12.24    1.22
 -11 -11   5    9.92    1.47
  11 -11  -5   11.95    1.38
  11  11   5   11.71    1.50
 -11  11  -5    7.07    1.36
 -13 -11  -5   21.35    2.03
  13 -11   5   22.22    1.63
  13  11  -5   19.10    1.73
 -13 -11  -5   23.22    1.90
 -13 -11   5   21.15    2.11
  13  11   5   20.58    1.93
  13 -11  -5   23.80    1.97
 -13  11  -5   22.37    2.09
  15  11  -5   26.62    2.27
 -15 -11  -5   26.66    2.21
  15 -11   5   34.06    2.42
 -15 -11   5   27.65    2.34
  15  11   5   23.91    2.25
  15 -11  -5   27.30    2.35
 -15  11  -5   30.52    2.60
  17  11  -5   20.56    2.25
  17 -11   5   20.67    1.98
 -17  11  -5   16.54    2.49
  17 -11  -5   20.19    2.37
  17  11   5   18.38    2.23
 -17 -11   5   21.78    2.38
   0  12   5    8.30    0.72
   0  12   5    7.98    0.78
   0 -12   5    8.50    0.69
   0  12  -5    8.21    0.72
   0 -12   5    8.30    0.64
   0 -12  -5    5.94    0.68
   0 -12   5    7.84    0.67
   2 -12   5    2.72    0.42
   2  12  -5    3.34    0.44
  -2 -12  -5    2.33    0.61
  -2  12   5    3.75    0.63
  -2  12  -5    3.85    0.58
   2  12   5    3.20    0.58
   2 -12  -5    3.19    0.62
   2  12   5    4.73    0.75
  -2 -12   5    2.91    0.69
  -2 -12   5    3.72    0.58
  -2 -12   5    3.56    0.59
  -4  12   5   41.60    1.92
   4  12  -5   39.89    1.75
  -4 -12  -5   43.89    1.99
  -4 -12  -5   42.61    1.77
  -4  12  -5   38.53    1.74
  -4 -12   5   42.23    2.14
  -4 -12   5   41.02    1.83
   4  12   5   44.52    2.03
  -4 -12   5   45.95    1.96
   4 -12  -5   42.16    1.96
  -6 -12  -5    4.51    0.63
  -6 -12  -5    4.01    0.81
  -6  12   5    4.24    0.72
   6  12  -5    4.91    0.71
  -6 -12   5    3.55    0.99
   6 -12  -5    3.17    0.75
   6  12   5    3.09    0.78
  -8 -12  -5   25.97    1.80
  -8  12   5   22.82    1.54
   8  12  -5   28.56    1.68
  -8 -12   5   27.00    2.15
   8  12   5   25.32    1.92
   8 -12  -5   23.81    1.72
  -8  12  -5   22.37    1.93
  10  12  -5   16.43    1.47
 -10 -12  -5   19.21    1.61
 -10  12   5   19.51    1.59
  10 -12   5   19.41    1.26
  10 -12   5   18.05    1.45
 -10 -12  -5   17.77    1.45
 -10  12  -5   17.02    1.80
 -10 -12   5   22.10    1.93
  10  12   5   19.17    1.61
  10 -12  -5   18.06    1.48
  12  12  -5    4.07    1.13
 -12 -12  -5    6.49    1.34
  12 -12   5    5.36    1.03
 -12 -12  -5    7.24    1.15
  12 -12  -5    4.32    1.25
 -12  12  -5    6.69    1.53
 -12 -12   5    7.14    1.56
  12  12   5    7.63    1.56
  14  12  -5   16.53    1.76
 -14 -12  -5   17.53    1.83
 -14 -12  -5   22.69    2.12
  14 -12   5   23.39    1.71
  14 -12  -5   25.36    2.13
 -14  12  -5   15.43    2.02
 -14 -12   5   20.12    2.16
  14  12   5   21.11    2.19
  16 -12   5    1.18    1.39
 -16 -12  -5    1.41    1.44
  16  12  -5    1.41    1.38
  16 -12  -5   -3.26    1.66
 -16  12  -5    1.33    1.71
  16  12   5   -1.70    1.76
 -16 -12   5    2.14    1.49
   1  13  -5   36.99    1.44
   1 -13   5   38.21    1.54
  -1 -13  -5   36.67    1.80
   1 -13   5   35.75    1.56
  -1  13   5   38.17    1.70
  -1  13   5   37.37    1.81
  -1 -13   5   37.51    1.76
  -1 -13   5   38.42    1.67
   1  13   5   38.62    1.83
   1  13   5   37.71    1.68
  -1  13  -5   38.40    1.68
   1 -13  -5   37.48    1.80
  -1 -13   5   38.90    1.67
   3  13  -5  131.35    4.64
  -3 -13  -5  130.45    4.84
  -3  13   5  135.46    4.79
   3  13   5  130.56    4.84
  -3  13  -5  131.62    4.63
  -3 -13   5  135.22    4.90
   3  13   5  129.37    4.66
  -3 -13   5  134.66    4.80
   3 -13  -5  132.06    4.82
  -3 -13   5  137.63    4.71
  -5 -13  -5    7.93    0.98
   5  13  -5    8.34    0.77
  -5  13   5    9.22    0.89
  -5 -13  -5    9.21    0.84
   5 -13  -5    9.12    0.93
   5  13   5   10.24    1.03
  -5  13  -5    8.66    0.78
  -5 -13   5    9.44    1.16
  -5 -13   5   10.51    1.01
  -7 -13  -5   14.46    1.22
  -7  13   5   16.68    1.18
   7  13  -5   17.59    1.37
   7 -13  -5   14.44    1.17
   7  13   5   14.62    1.37
  -7 -13   5   15.80    1.47
   9  13  -5    7.08    1.03
  -9 -13  -5    6.04    1.09
  -9  13   5    6.67    0.91
  -9 -13  -5    7.71    0.92
  -9  13  -5    6.98    1.30
   9  13   5    7.54    1.20
  -9 -13   5    7.56    1.37
   9 -13  -5    7.92    1.05
 -11 -13  -5   10.24    1.16
 -11 -13  -5    6.09    1.31
  11 -13   5    7.80    0.88
  11  13  -5    8.52    1.30
  11 -13   5    6.37    0.98
  11 -13  -5    9.02    1.25
 -11  13  -5   11.20    1.57
 -11 -13   5    8.53    1.49
  11  13   5    9.94    1.43
 -13 -13  -5   10.86    1.57
  13  13  -5   12.41    1.65
 -13 -13  -5   14.00    1.40
  13 -13   5   10.61    1.30
 -13 -13   5   10.82    1.75
 -13  13  -5    9.75    1.69
  13 -13  -5   14.52    1.70
  13  13   5   10.92    1.58
 -15 -13  -5   20.84    2.01
  15 -13   5   31.11    2.38
  15  13  -5   22.26    2.02
 -15  13  -5   22.23    2.50
  15 -13  -5   23.73    2.34
  15  13   5   23.47    2.35
 -15 -13   5   22.16    2.12
  17 -13   5    3.66    1.53
  17  13  -5   -1.17    1.46
 -17  13  -5    1.80    1.83
  17 -13  -5    1.19    2.06
 -17 -13   5    5.82    1.68
  17  13   5   -0.04    1.76
   0  14   5    0.57    0.56
   0  14   5   -0.02    0.61
   0 -14   5    0.39    0.55
   0 -14   5    0.10    0.46
   0 -14  -5    0.47    0.59
   0  14  -5   -0.08    0.52
  -2  14   5   25.94    1.50
  -2 -14  -5   27.90    1.58
   2  14  -5   27.92    1.20
   2  14   5   27.68    1.58
  -2 -14   5   26.24    1.46
   2  14   5   27.06    1.44
   2 -14  -5   25.69    1.55
  -2 -14   5   25.94    1.42
  -2 -14   5   24.63    1.61
  -2  14  -5   25.00    1.40
   4  14  -5   61.62    2.39
  -4  14   5   62.83    2.55
  -4 -14  -5   60.55    2.64
  -4  14  -5   60.38    2.41
   4  14   5   64.06    2.67
  -4 -14   5   56.74    2.74
  -4 -14   5   66.26    2.66
   4  14   5   61.97    2.50
   4 -14  -5   60.02    2.59
  -6 -14  -5   12.59    1.21
   6  14  -5   12.70    0.98
  -6  14   5   12.71    1.04
  -6  14  -5   11.96    0.94
   6  14   5   14.91    1.21
   6 -14  -5   11.63    1.10
  -6 -14   5   11.90    1.27
   8  14  -5   26.22    1.74
  -8 -14  -5   25.38    1.91
  -8  14   5   26.35    1.65
  -8 -14  -5   28.60    1.57
  -8  14  -5   23.76    2.10
  -8 -14   5   24.23    1.95
   8 -14  -5   22.94    1.79
   8  14   5   25.70    2.05
  10  14  -5    5.77    1.15
 -10 -14  -5    4.60    1.12
 -10 -14  -5    5.86    0.95
 -10 -14   5    6.08    1.47
  10  14   5    7.14    1.34
  10 -14  -5    4.75    1.10
 -10  14  -5    3.20    1.22
 -12 -14  -5    2.12    1.18
  12  14  -5    1.42    1.12
 -12 -14  -5    4.01    0.99
  12 -14   5    3.21    1.01
 -12  14  -5    1.96    1.41
 -12 -14   5    3.17    1.39
  12  14   5    5.43    1.45
  12 -14  -5    4.28    1.27
  14  14  -5   49.00    3.09
  14 -14   5   52.51    2.73
 -14 -14  -5   49.27    3.22
 -14 -14   5   52.02    3.46
 -14  14  -5   43.94    3.62
  14  14   5   48.17    3.48
  14 -14  -5   49.25    3.22
  16  14  -5    5.91    1.57
 -16 -14  -5    5.37    1.67
  16 -14   5    6.70    1.52
 -16 -14   5    8.78    1.76
  16 -14  -5    5.45    1.92
  16  14   5    5.56    1.86
 -16  14  -5    4.75    1.88
  -1  15   5   23.09    1.45
  -1  15   5   24.01    1.39
  -1 -15  -5   19.80    1.45
   1 -15   5   21.18    1.20
   1 -15   5   21.49    1.18
  -1 -15   5   20.41    1.42
  -1 -15   5   24.42    1.35
  -1 -15   5   22.04    1.31
   1  15   5   21.98    1.48
  -1  15  -5   22.49    1.36
   1  15   5   23.48    1.38
  -3 -15  -5  114.77    4.26
  -3  15   5  116.08    4.18
   3  15  -5  112.36    3.99
   3 -15  -5  114.43    4.21
  -3 -15   5  106.54    4.27
  -3 -15   5  111.06    4.22
   3  15   5  112.70    4.08
  -3  15  -5  108.35    4.04
   3  15   5  115.73    4.27
  -5  15   5   79.43    3.08
  -5 -15  -5   76.12    3.22
   5  15  -5   75.83    2.98
  -5 -15   5   86.03    3.33
   5 -15  -5   77.14    3.15
   5  15   5   79.92    3.26
  -5  15  -5   73.68    2.95
  -5 -15   5   75.97    3.39
  -7  15   5   -1.31    0.66
  -7 -15  -5   -0.43    0.85
   7  15  -5   -0.38    0.66
  -7  15  -5    1.47    0.96
   7  15   5   -0.68    0.87
   7 -15  -5   -0.92    0.80
  -7 -15   5   -0.59    1.05
  -9 -15  -5    4.90    0.83
   9  15  -5    6.16    1.02
  -9 -15  -5    7.67    1.23
   9 -15  -5    5.13    1.06
  -9 -15   5    5.08    1.34
  -9  15  -5    5.29    1.30
   9  15   5    7.65    1.30
  11  15  -5    2.15    1.13
 -11 -15  -5    4.03    1.21
 -11 -15  -5    3.91    0.91
  11 -15  -5    4.10    1.21
 -11 -15   5    5.71    1.58
 -11  15  -5    3.63    1.39
  11  15   5    7.19    1.47
  13 -15   5    9.56    1.22
 -13 -15  -5    7.96    1.44
  13  15  -5    7.07    1.46
 -13 -15   5    7.11    1.77
  13 -15  -5    8.72    1.56
  13  15   5    5.82    1.57
 -13  15  -5    7.78    1.84
 -15 -15  -5   13.22    1.87
  15  15  -5   11.38    1.65
  15 -15   5   15.21    1.60
 -15 -15   5   11.17    1.88
  15 -15  -5   12.57    1.92
 -15  15  -5   11.86    2.06
  15  15   5   10.49    1.98
   0 -16  -5   -0.14    0.66
   0  16   5    0.00    0.64
   0 -16   5   -0.19    0.61
   0  16  -5   -1.01    0.62
   0 -16   5    0.56    0.57
   0  16   5    0.85    0.67
  -2  16   5   15.77    1.30
  -2 -16  -5   14.02    1.15
  -2  16   5   15.41    1.30
  -2 -16   5   12.65    1.14
   2  16   5   15.59    1.15
   2  16   5   17.86    1.33
   2 -16  -5   13.73    1.13
  -2  16  -5   15.69    1.09
  -2 -16   5   17.72    1.35
  -4 -16  -5   65.33    2.91
   4  16  -5   66.40    2.59
  -4  16   5   68.93    2.79
   4  16   5   67.91    2.93
   4 -16  -5   66.91    2.86
  -4  16  -5   67.79    2.69
   4  16   5   70.27    2.78
  -4 -16   5   68.89    2.97
  -4 -16   5   65.58    3.02
  -6  16   5   19.35    1.28
  -6 -16  -5   17.39    1.35
   6  16  -5   18.74    1.33
  -6 -16   5   14.35    1.50
   6 -16  -5   14.78    1.23
   6  16   5   18.40    1.49
  -6  16  -5   16.22    1.32
   8  16  -5    6.31    0.93
  -8 -16  -5    3.52    1.04
  -8 -16   5    3.72    1.23
   8 -16  -5    6.58    1.05
  -8  16  -5    6.32    1.25
   8  16   5    3.75    1.15
 -10 -16  -5    0.23    1.08
  10  16  -5   -1.10    0.91
 -10 -16  -5    0.45    0.75
 -10 -16   5    1.48    1.27
  10 -16  -5   -1.26    0.97
 -10  16  -5    0.63    1.31
  10  16   5   -0.18    1.18
 -12 -16  -5    1.61    1.22
  12  16  -5    3.32    1.14
 -12  16  -5    1.72    1.57
 -12 -16   5    4.96    1.50
  12 -16  -5    0.84    1.23
  12  16   5    3.23    1.53
  14 -16   5   13.21    1.43
 -14 -16  -5    7.83    1.68
 -14  16  -5    9.31    2.05
  14  16   5   12.47    1.94
  14 -16  -5    8.90    1.76
 -14 -16   5   11.63    2.07
  16 -16   5    7.31    1.53
 -16 -16  -5    1.20    1.75
 -16  16  -5    0.88    1.91
 -16 -16   5    3.67    1.85
  16 -16  -5   -0.26    1.86
  16  16   5    2.16    2.04
   1 -17   5    8.99    0.79
  -1  17   5   11.20    1.02
  -1  17   5   10.18    0.99
   1 -17   5    9.56    0.85
  -1 -17  -5   10.27    1.01
   1  17   5   10.75    0.99
  -1 -17   5    9.29    0.97
  -1  17  -5   11.14    0.99
  -1 -17   5    9.09    0.95
   1  17   5    9.52    1.07
   1 -17  -5    8.08    0.96
   3  17  -5   60.48    2.32
  -3  17   5   61.04    2.57
  -3 -17  -5   63.58    2.72
  -3 -17   5   57.73    2.76
   3  17   5   61.26    2.58
  -3 -17   5   59.83    2.72
  -3  17  -5   60.33    2.51
   3 -17  -5   57.84    2.66
   3  17   5   62.34    2.73
   5  17  -5   38.07    1.73
  -5  17   5   36.80    1.91
  -5 -17  -5   37.74    2.17
   5  17   5   37.90    2.21
  -5 -17   5   33.03    2.30
   5 -17  -5   33.95    2.00
  -5  17  -5   35.32    1.81
   7  17  -5    6.36    0.89
  -7 -17  -5    7.34    1.12
  -7 -17   5    4.29    1.24
  -7  17  -5    7.01    1.27
   7 -17  -5    6.80    1.01
   7  17   5    6.80    1.21
  -7  17  -5    8.14    0.92
   9  17  -5    1.30    0.87
  -9 -17  -5    0.89    1.08
  -9 -17   5    2.30    1.26
   9  17   5    0.55    1.27
  -9  17  -5    0.77    1.26
   9 -17  -5    1.83    0.93
 -11 -17  -5    3.70    1.40
 -11 -17   5    5.04    1.60
  11 -17  -5    3.12    1.23
  11  17   5    2.99    1.37
 -11  17  -5    4.05    1.58
 -13 -17  -5    9.48    1.64
  13  17   5    7.00    1.92
  13 -17  -5    5.33    1.58
 -13  17  -5    7.39    1.96
 -13 -17   5    7.34    1.63
 -15 -17  -5   24.70    2.27
  15 -17  -5   23.19    2.35
  15  17   5   27.37    2.49
 -15 -17   5   20.82    2.33
 -15  17  -5   22.09    2.64
   0  18   5    6.05    0.94
   0 -18  -5    6.49    0.92
   0 -18   5    7.41    0.86
   0 -18   5    7.98    0.90
   0  18   5    6.81    0.96
   0  18  -5    7.88    0.96
  -2  18   5   77.98    3.20
  -2 -18  -5   84.75    3.34
  -2  18   5   78.41    3.20
  -2 -18   5   77.10    3.31
   2  18   5   81.10    3.29
  -2  18  -5   77.32    3.15
  -2 -18   5   77.01    3.29
   2  18   5   86.25    3.22
  -4 -18  -5   38.50    2.15
  -4  18   5   33.77    1.88
   4  18  -5   34.47    1.64
  -4 -18   5   31.78    2.24
   4 -18  -5   37.89    2.01
   4  18   5   39.63    2.16
  -4  18  -5   33.15    1.85
   4  18   5   35.79    1.96
  -6 -18  -5    6.74    1.09
  -6  18  -5    6.69    1.21
   6  18   5    5.75    1.18
  -6 -18   5    4.10    1.24
  -6  18  -5    4.44    0.80
   6 -18  -5    5.16    1.01
  -8 -18  -5    0.63    1.02
   8  18   5    1.04    1.26
   8 -18  -5    1.13    0.92
  -8  18  -5    1.18    1.20
  -8  18  -5    1.23    0.78
  -8 -18   5   -0.08    1.19
 -10 -18  -5    1.12    1.13
 -10  18  -5   -0.01    1.39
 -10 -18   5    0.34    1.44
  10 -18  -5    0.14    1.07
  10  18   5   -0.24    1.35
 -12 -18  -5    2.98    1.31
 -12 -18   5    3.28    1.68
 -12  18  -5    4.51    1.67
  12  18   5    1.06    1.56
  12 -18  -5    0.27    1.35
 -14 -18  -5   10.38    1.73
 -14  18  -5    7.51    2.03
  14 -18  -5    5.39    1.73
  14  18   5   10.56    2.15
 -14 -18   5    9.70    1.89
   1 -19   5    3.12    0.74
  -1  19   5    3.72    0.81
   1 -19   5    2.48    0.76
  -1  19   5    3.65    0.92
  -1 -19  -5    1.80    0.91
  -1 -19   5    2.11    0.85
   1  19   5    3.12    0.91
  -1 -19   5    2.60    0.90
   1  19   5    4.52    0.97
   1 -19  -5    3.17    0.94
  -1  19  -5    3.89    0.89
  -3  19   5    2.24    0.82
  -3  19   5    4.27    0.98
  -3 -19  -5    5.74    1.06
   3 -19  -5    4.65    0.95
  -3 -19   5    2.51    1.04
   3 -19  -5    3.51    0.93
   3  19   5    4.69    0.95
   3  19   5    4.04    0.96
  -3 -19   5    3.01    1.06
  -3  19  -5    4.45    0.83
  -5 -19  -5   11.61    1.24
  -5 -19   5   10.90    1.47
  -5  19  -5   12.16    1.14
   5  19   5   14.53    1.39
  -5  19  -5   13.89    1.46
   5 -19  -5   13.02    1.21
  -7 -19  -5   10.07    1.39
  -7  19  -5    6.51    0.96
   7  19   5    6.43    1.33
   7 -19  -5    8.28    1.13
  -7  19  -5    6.98    1.45
  -7 -19   5    7.45    1.45
  -9 -19  -5    0.77    1.15
  -9 -19   5    0.04    1.35
  -9  19  -5    0.10    1.32
   9  19   5   -0.60    1.30
   9 -19  -5   -1.31    1.01
 -11 -19  -5   11.44    1.60
  11 -19  -5   18.27    1.66
 -11 -19   5   13.32    2.01
 -11  19  -5   13.45    2.06
  11  19   5   17.27    1.95
 -13 -19  -5    9.48    1.64
 -13 -19   5    8.15    1.77
  13  19   5    9.65    2.09
  13 -19  -5    9.99    1.81
 -13  19  -5    9.32    2.04
 -15 -19  -5    6.73    1.91
 -15  19  -5    6.00    2.06
  15  19   5    6.69    2.09
 -15 -19   5    6.47    1.79
  15 -19  -5    8.26    1.96
   0  20  -5   12.76    1.19
   0  20   5    9.34    1.09
   0  20   5   10.16    1.11
   0 -20   5   10.61    1.07
   0 -20  -5    8.29    0.96
   0 -20   5   10.21    1.02
   0 -20  -5   10.09    1.12
  -2  20   5   37.29    2.02
  -2  20   5   36.85    2.10
  -2 -20  -5   41.48    2.24
  -2 -20   5   32.46    2.18
  -2 -20   5   35.67    2.20
   2 -20  -5   33.90    2.12
  -2  20  -5   39.90    2.04
   2  20   5   37.29    2.14
   2 -20  -5   37.99    2.18
   2  20   5   36.79    2.11
  -4 -20  -5   17.07    1.42
  -4  20   5   18.43    1.47
   4 -20  -5   13.71    1.29
  -4  20  -5   15.83    1.26
   4  20   5   16.39    1.35
  -4 -20   5   13.58    1.50
   4  20   5   19.04    1.49
  -6 -20  -5    6.45    1.15
   6  20   5    6.76    1.36
  -6 -20   5    5.93    1.39
  -6  20  -5    6.28    0.96
   6 -20  -5    7.09    1.08
  -6  20  -5    8.62    1.42
  -8 -20  -5   -0.49    1.18
   8  20   5    0.53    1.22
  -8  20  -5    0.79    1.36
   8 -20  -5    0.73    1.04
  -8  20  -5    1.22    0.87
  -8 -20   5   -1.38    1.22
 -10 -20  -5    1.54    1.27
 -10 -20   5   -0.44    1.50
  10  20   5    1.38    1.59
 -10  20  -5    1.20    1.55
  10 -20  -5    2.72    1.20
 -12 -20  -5   15.07    1.82
 -12  20  -5   14.26    2.30
 -12 -20   5   14.36    1.95
  12 -20  -5   12.65    1.66
  12  20   5   14.16    2.21
 -14 -20  -5   10.62    1.82
  14  20   5   10.20    2.15
  14 -20  -5    7.25    1.89
 -14 -20   5    9.21    2.10
 -14  20  -5    8.21    2.13
  -1  21   5   24.61    1.85
   1 -21   5   23.89    1.50
  -1 -21  -5   21.19    1.64
  -1  21   5   21.55    1.84
   1  21   5   24.00    1.85
  -1  21  -5   27.43    1.81
   1 -21  -5   24.84    1.85
  -1 -21   5   21.51    1.82
   1 -21  -5   18.25    1.72
  -1 -21   5   21.50    1.73
   1  21   5   21.82    1.84
  -3  21   5   20.36    1.55
  -3 -21  -5   27.39    2.05
  -3  21  -5   26.03    1.73
   3 -21  -5   20.04    1.59
   3  21   5   26.28    1.93
   3  21   5   26.01    2.01
  -3 -21   5   17.33    1.64
   3 -21  -5   23.30    1.91
  -5 -21  -5    1.95    1.02
  -5  21  -5    1.14    0.88
   5  21   5    0.52    1.13
   5 -21  -5    1.76    0.95
  -5  21  -5    0.73    1.12
  -5 -21   5    0.95    1.23
  -7 -21  -5   12.34    1.54
  -7  21  -5   10.58    1.64
  -7  21  -5   10.42    1.17
  -7 -21   5    6.64    1.54
   7 -21  -5   10.08    1.33
   7  21   5    9.81    1.46
  -9 -21  -5    4.97    1.24
  -9 -21   5    3.56    1.48
  -9  21  -5    6.25    1.70
  -9  21  -5    5.30    1.08
   9  21   5    6.56    1.49
   9 -21  -5    5.15    1.29
 -11 -21  -5    9.54    1.85
 -11  21  -5    7.68    2.01
  11 -21  -5    8.60    1.48
 -11 -21   5    7.66    1.74
  11  21   5    7.19    1.62
 -13 -21  -5    1.10    1.55
  13  21   5    1.70    1.89
 -13  21  -5    1.31    1.90
  13 -21  -5    1.01    1.55
 -13 -21   5    1.27    1.85
   0 -22   5   40.14    2.18
   0  22   5   42.16    2.34
   0 -22   5   42.50    2.16
   0  22  -5   42.25    2.38
   0 -22  -5   42.77    2.42
  -2  22   5   68.94    3.13
  -2 -22  -5   70.34    3.22
  -2  22  -5   70.32    3.07
  -2 -22   5   67.73    3.23
   2  22   5   73.75    3.17
   2 -22  -5   71.29    3.16
   2  22   5   72.20    3.34
  -4 -22  -5    2.26    1.15
  -4  22   5    1.21    1.03
  -4  22  -5    1.89    1.17
  -4  22  -5    2.29    0.89
  -4 -22   5    2.31    1.26
   4  22   5    3.07    1.15
   4  22   5    3.10    1.16
  -6 -22  -5    3.66    1.22
   6 -22  -5    2.84    1.12
  -6 -22   5    2.87    1.39
  -6  22  -5    3.83    1.36
   6  22   5    2.98    1.25
  -6  22  -5    3.99    1.02
  -8 -22  -5    5.08    1.36
  -8  22  -5    4.97    1.05
  -8 -22   5    4.28    1.54
   8  22   5    3.78    1.46
   8 -22  -5    3.56    1.26
  -8  22  -5    7.38    1.76
 -10 -22  -5    2.04    1.29
  10 -22  -5    3.25    1.31
 -10 -22   5    0.72    1.67
 -10  22  -5    3.53    1.09
 -10  22  -5    0.09    1.74
  10  22   5    4.06    1.57
 -12 -22  -5    0.45    1.38
 -12  22  -5   -0.11    1.84
  12 -22  -5   -0.18    1.45
 -12 -22   5    2.82    1.82
  -1  23   5   28.08    2.07
  -1 -23  -5   23.11    1.75
   1  23   5   26.10    2.05
   1 -23  -5   24.48    2.02
  -1  23  -5   25.12    2.01
  -1 -23   5   26.57    2.03
  -3 -23  -5   19.28    1.64
  -3  23   5   26.74    2.03
  -3 -23   5   20.95    1.78
  -3  23  -5   21.51    1.87
   3 -23  -5   21.08    1.71
  -3  23  -5   23.82    1.90
   3  23   5   22.58    1.73
  -5  23   5   -1.33    1.07
  -5 -23  -5    1.13    1.20
  -5  23  -5    1.07    0.92
   5 -23  -5   -0.19    1.05
  -5  23  -5   -0.64    1.24
  -5 -23   5   -1.34    1.30
  -7 -23  -5    1.07    1.24
  -7  23  -5    0.62    1.43
   7 -23  -5    0.53    1.13
  -7  23  -5    0.42    0.96
  -7 -23   5   -1.28    1.38
  -9 -23  -5    1.98    1.39
  -9  23  -5    2.38    1.73
   9 -23  -5    3.22    1.35
  -9  23  -5    1.83    1.02
  -9 -23   5    1.63    1.59
 -11 -23  -5   -0.33    1.52
 -11  23  -5    2.19    1.22
  11 -23  -5    1.98    1.45
 -11 -23   5    1.78    1.65
 -11  23  -5    3.45    1.96
   0  24  -5    8.42    1.36
   0  24   5    9.42    1.31
   0 -24  -5    7.64    1.32
   0 -24   5    8.29    1.20
  -2 -24  -5   67.05    3.26
  -2  24   5   69.25    3.20
  -2 -24   5   62.85    3.26
   2 -24  -5   65.52    3.20
  -2  24  -5   68.98    3.12
  -2  24  -5   66.41    3.60
   2  24   5   73.06    3.26
  -4  24   5   13.71    1.54
  -4 -24  -5   14.70    1.57
  -4  24  -5   15.00    1.78
   4 -24  -5   16.30    1.57
   4  24   5   14.72    1.56
  -4  24  -5   15.92    1.37
  -4 -24   5   11.30    1.69
  -6 -24  -5    3.45    1.33
  -6  24   5    1.29    1.17
   6 -24  -5    1.72    1.22
  -6  24  -5    3.64    1.11
  -6 -24   5    0.81    1.44
  -6  24  -5    2.75    1.47
  -8 -24  -5    0.65    1.38
  -8  24  -5    0.30    1.56
  -8 -24   5    0.41    1.54
  -8  24  -5    1.89    1.04
   8 -24  -5   -0.11    1.26
 -10 -24  -5    0.37    1.53
 -10  24  -5   -0.07    1.82
 -10 -24   5    0.78    1.77
  10 -24  -5   -0.33    1.44
 -10  24  -5   -0.06    1.11
 -12 -24  -5    4.55    1.62
 -12 -24   5    7.11    1.91
  12 -24  -5    6.15    1.72
 -12  24  -5    3.11    2.09
  -1  25   5   33.45    2.31
  -1 -25  -5   26.69    2.06
   1  25   5   29.68    2.36
  -1  25  -5   30.54    2.29
  -1  25  -5   30.99    2.45
  -1 -25   5   27.88    2.28
   1 -25  -5   31.73    2.44
  -3  25   5   12.99    1.51
  -3 -25  -5   11.09    1.59
   3  25   5   15.47    1.63
  -3  25  -5   13.66    1.73
  -3 -25   5   12.05    1.63
  -3  25  -5   12.49    1.37
   3 -25  -5   11.97    1.45
  -5 -25  -5    5.12    1.36
  -5  25   5    6.51    1.37
  -5 -25   5    2.45    1.49
   5 -25  -5    5.19    1.34
  -5  25  -5    3.77    1.57
  -5  25  -5    5.35    1.12
  -7 -25  -5   -0.83    1.36
  -7  25   5   -0.65    1.27
   7 -25  -5    0.63    1.29
  -7 -25   5   -2.27    1.53
  -7  25  -5    1.54    1.56
  -7  25  -5   -0.55    1.03
  -9 -25  -5    1.83    1.44
   9 -25  -5    4.19    1.51
  -9 -25   5    1.81    1.81
  -9  25  -5    1.55    1.12
  -9  25  -5    4.57    1.84
 -11 -25  -5    0.92    1.46
  11 -25  -5   -0.51    1.62
 -11 -25   5   -0.87    1.86
 -11  25  -5    1.51    1.21
 -11  25  -5   -0.87    1.88
   0 -26   5    8.69    1.32
   0  26  -5   11.86    1.51
   0 -26  -5    8.22    1.48
   0  26   5   10.77    1.47
   0  26  -5   12.08    1.49
  -2  26   5    6.38    1.38
  -2 -26  -5    5.37    1.34
   2  26   5    7.02    1.46
  -2  26  -5    5.96    1.51
  -2  26  -5    5.60    1.23
  -2 -26   5    5.33    1.39
   2 -26  -5    4.09    1.32
  -4 -26  -5    3.91    1.40
  -4  26   5    2.66    1.25
  -4  26  -5    2.67    1.13
  -4 -26   5    1.08    1.51
  -4  26  -5    2.33    1.47
   4 -26  -5    2.13    1.28
  -6  26   5   -0.17    1.31
  -6 -26  -5    0.96    1.32
   6 -26  -5   -0.67    1.32
  -6 -26   5    0.00    1.54
  -6  26  -5   -0.38    1.52
  -6  26  -5    1.58    1.15
  -8  26   5   14.91    1.80
  -8 -26  -5    9.50    1.58
  -8  26  -5   11.03    1.49
  -8 -26   5   10.86    1.96
   8 -26  -5   11.02    1.66
  -8  26  -5   13.58    2.10
 -10 -26  -5   -0.36    1.64
 -10  26  -5    2.21    1.22
 -10 -26   5   -1.11    1.87
 -10  26  -5    2.39    1.98
  10 -26  -5    3.59    1.66
   1 -27   5    2.89    1.08
  -1  27   5    3.91    1.33
  -1 -27  -5    3.41    1.34
  -1  27  -5    4.43    1.32
  -1  27  -5    1.93    1.34
   1 -27  -5    4.36    1.41
  -1 -27   5    0.24    1.32
   1  27   5    3.75    1.39
  -3 -27  -5   12.33    1.65
  -3  27   5   15.92    1.71
   3 -27  -5   11.82    1.59
  -3  27  -5   14.98    1.91
  -3  27  -5   14.20    1.57
  -3 -27   5   10.28    1.71
   3  27   5   14.37    1.68
  -5  27   5    3.75    1.42
  -5 -27  -5    0.64    1.48
   5 -27  -5    4.51    1.46
  -5  27  -5    2.12    1.64
  -5  27  -5    3.29    1.20
  -5 -27   5    4.61    1.72
  -7 -27  -5    1.19    1.51
  -7  27   5    3.27    1.44
  -7  27  -5    3.17    1.79
  -7  27  -5    1.46    1.20
  -7 -27   5    1.52    1.73
  -9 -27  -5    0.14    1.42
  -9  27   5    0.27    1.53
   9 -27  -5    3.07    1.62
  -9  27  -5    2.87    1.91
  -9 -27   5    0.12    1.80
  -9  27  -5    1.86    1.26
   0  28   5    0.25    1.36
   0 -28  -5   -1.53    1.40
   0 -28   5   -2.48    1.19
  -2  28   5    3.47    1.37
  -2 -28  -5    3.74    1.47
   2  28   5    5.67    1.55
   2 -28  -5    2.92    1.49
  -2 -28   5    1.81    1.43
  -2  28  -5    2.41    1.32
  -4  28   5   14.23    1.73
  -4 -28  -5   12.43    1.78
  -4  28  -5   13.76    1.55
  -4  28  -5   13.16    1.99
  -4 -28   5   10.97    1.88
   4 -28  -5   12.65    1.76
  -6 -28  -5   -1.02    1.58
  -6  28   5   -0.52    1.42
  -6 -28   5   -1.79    1.69
  -6  28  -5   -0.73    1.71
  -6  28  -5    1.49    1.26
   6 -28  -5    1.99    1.56
  -8  28   5    5.72    1.66
  -8 -28  -5    3.46    1.52
  -8  28  -5    5.16    1.98
  -8  28  -5    3.59    1.36
  -8 -28   5    6.49    2.06
  -1  29   5    2.36    1.53
  -1 -29  -5    1.91    1.45
  -1  29  -5    0.33    1.42
   1  29   5    2.99    1.49
   1 -29  -5    0.64    1.49
  -1 -29   5    0.76    1.40
  -3  29   5   15.01    1.80
  -3 -29  -5   13.37    1.79
  -3  29  -5   14.86    1.66
   3  29   5   15.72    1.96
   3 -29  -5   12.53    1.80
  -3 -29   5   12.73    1.88
  -5  29   5    6.06    1.66
  -5 -29  -5    6.79    1.70
  -5  29  -5    5.53    1.45
  -5 -29   5    5.37    1.83
   5 -29  -5    4.35    1.65
   0 -30  -5    1.65    1.55
   0 -30   5   -0.08    1.34
   0  30   5   -1.33    1.53
  -2 -30  -5    4.19    1.71
  -2  30   5    1.87    1.47
  -2  30  -5    4.69    1.60
   2 -30  -5    2.39    1.60
   2  30   5    5.56    1.65
  -2 -30   5    3.39    1.61
  -4 -30  -5    9.23    1.80
  -4  30   5   12.66    1.75
  -4  30  -5    8.73    1.57
   4 -30  -5   10.09    1.82
  -4 -30   5    5.32    1.86
  -1 -31  -5    5.97    1.77
   1 -31  -5    6.88    1.75
  -1 -31   5    5.16    1.60
   0   0  -6   77.30    2.73
   0   0   6   69.42    2.75
   0   0   6   74.26    2.74
   2   0   6  146.64    5.25
   2   0  -6  150.54    5.25
  -2   0  -6  149.60    5.21
  -2   0   6  152.08    5.29
   2   0   6  152.65    5.24
   4   0  -6  132.08    4.69
   4   0   6  127.30    4.66
  -4   0   6  129.10    4.74
   4   0   6  139.13    4.68
  -4   0  -6  130.82    4.61
   6   0   6    0.56    0.40
  -6   0   6    0.69    0.65
   6   0  -6    0.43    0.53
  -6   0  -6    0.30    0.42
   6   0   6    0.54    0.50
  -8   0  -6    0.40    0.55
   8   0  -6    0.79    0.66
  -8   0   6    0.45    0.72
   8   0   6    1.03    0.57
   8   0   6    0.51    0.70
 -10   0   6    3.50    0.97
  10   0   6    2.88    0.79
 -10   0  -6    2.67    0.77
  10   0  -6    2.50    0.92
 -12   0  -6   -1.06    0.92
 -12   0   6   -0.09    0.98
  12   0   6    1.45    0.95
  12   0  -6   -0.17    1.00
 -12   0  -6    0.41    0.81
 -14   0   6   46.83    2.90
 -14   0  -6   45.40    3.01
  14   0  -6   44.18    2.90
  14   0   6   43.83    2.79
 -16   0   6   94.52    4.45
  16   0   6   91.60    4.41
 -16   0  -6   89.01    4.79
  16   0  -6   92.80    4.54
  18   0  -6   10.06    2.12
  18   0   6    6.72    1.91
 -18   0  -6    7.97    1.88
   1   1  -6    8.24    0.63
  -1   1   6    8.72    0.73
   1  -1   6   11.35    0.76
   1  -1   6    8.85    0.68
  -1  -1  -6    7.59    0.60
  -1  -1   6    9.25    0.77
  -1  -1   6    8.12    0.70
  -1   1  -6    8.45    0.70
   1  -1  -6   11.24    0.78
   1   1   6    9.38    0.76
  -3  -1  -6  193.65    6.76
   3   1  -6  200.39    6.81
  -3   1   6  196.95    6.85
   3  -1   6  206.95    6.79
   3  -1   6  187.01    6.77
   3  -1  -6  198.64    6.81
  -3  -1   6  198.54    6.85
   3   1   6  205.07    6.82
  -3   1  -6  192.28    6.74
   3   1   6  191.09    6.80
   5   1  -6  188.81    6.44
  -5  -1  -6  181.13    6.36
   5  -1   6  172.12    6.36
  -5   1   6  187.19    6.49
   5   1   6  183.08    6.41
   5  -1  -6  187.79    6.44
  -5  -1   6  187.50    6.50
  -5   1  -6  184.51    6.34
  -7   1   6   18.69    1.43
   7   1  -6   18.22    1.33
  -7  -1  -6   17.25    1.15
   7  -1   6   18.11    1.24
   7  -1   6   17.89    1.10
  -7   1  -6   17.66    1.08
   7   1   6   18.63    1.30
  -7  -1   6   17.65    1.47
   7  -1  -6   17.23    1.34
  -9  -1  -6   18.07    1.35
   9  -1   6   17.65    1.28
   9  -1   6   17.14    1.40
  -9   1   6   18.15    1.44
   9   1  -6   18.18    1.52
  -9  -1   6   16.43    1.35
  -9   1  -6   17.77    1.25
   9   1   6   18.57    1.46
   9  -1  -6   18.04    1.34
 -11  -1  -6    7.92    1.15
 -11   1   6    6.65    1.14
  11  -1   6    6.26    1.04
 -11  -1  -6    6.22    0.97
  11   1  -6    9.26    1.25
 -11   1  -6    8.22    1.00
  11  -1  -6    6.63    1.12
 -11  -1   6    8.40    1.32
  11   1   6    6.23    0.95
 -11   1  -6    6.86    1.14
 -13   1   6   61.37    3.18
  13   1  -6   58.88    3.16
 -13  -1  -6   60.65    3.35
  13  -1   6   59.80    3.00
 -13   1  -6   57.47    3.36
  13   1   6   57.76    3.01
  13  -1  -6   60.88    3.16
 -13  -1   6   61.79    3.25
 -15  -1  -6   50.13    3.33
  15  -1   6   50.24    3.17
  15   1  -6   51.65    3.29
 -15   1   6   56.16    3.24
  15  -1  -6   56.94    3.34
 -15   1  -6   51.75    3.38
  15   1   6   55.21    3.27
 -15  -1   6   55.55    3.26
  17   1  -6    0.66    1.58
 -17  -1  -6    0.28    1.44
  17  -1   6    1.65    1.65
 -17   1  -6    0.31    1.56
  17  -1  -6    1.00    1.69
  17   1   6    0.15    1.61
 -17  -1   6    0.12    1.53
   0  -2   6    0.62    0.46
   0  -2   6    0.59    0.40
   0   2   6    0.89    0.45
   0  -2  -6   -0.21    0.33
   0   2  -6    0.44    0.36
   2   2  -6   82.22    2.90
  -2  -2  -6   78.07    2.89
   2  -2   6   79.15    2.87
  -2   2   6   77.99    2.96
   2  -2   6   78.21    2.90
  -2  -2   6   77.23    2.95
  -2   2  -6   75.88    2.83
   2  -2  -6   81.13    2.93
   2   2   6   77.70    2.93
   4   2  -6   75.76    2.90
  -4  -2  -6   76.09    2.85
   4  -2   6   79.55    2.85
   4  -2   6   74.84    2.85
  -4   2   6   78.90    2.97
  -4   2  -6   77.16    2.79
   4   2   6   74.88    2.91
  -4  -2   6   77.84    2.99
   4  -2  -6   78.57    2.93
  -6  -2  -6   21.33    1.21
   6  -2   6   23.15    1.17
  -6   2   6   20.60    1.40
   6  -2   6   21.11    1.24
   6   2  -6   20.08    1.33
  -6   2  -6   21.34    1.11
   6  -2  -6   21.79    1.37
  -6  -2   6   23.02    1.49
   6   2   6   23.22    1.30
   8   2  -6    0.18    0.64
  -8  -2  -6    0.39    0.56
   8  -2   6   -0.16    0.50
   8  -2   6    0.75    0.62
  -8   2   6   -0.20    0.65
  -8   2  -6    0.29    0.51
   8  -2  -6   -0.83    0.67
  -8  -2   6   -0.38    0.79
   8   2   6    1.05    0.72
  10   2  -6    3.47    0.87
  10  -2   6    3.74    0.87
 -10  -2  -6    3.97    0.81
  10  -2   6    3.54    0.76
 -10   2   6    4.42    0.98
  10   2   6    2.87    0.92
 -10  -2   6    2.14    1.00
 -10   2  -6    3.64    0.74
  10  -2  -6    1.60    0.89
 -12  -2  -6   13.23    1.41
 -12   2   6   16.11    1.63
 -12  -2  -6   13.57    1.32
  12  -2   6   13.28    1.26
  12   2  -6   11.03    1.35
 -12  -2   6   12.47    1.51
  12  -2  -6   11.03    1.35
  12   2   6   11.22    1.26
 -12   2  -6   12.84    1.46
 -14   2   6   20.19    1.81
  14  -2   6   22.22    1.83
 -14  -2  -6   19.64    1.89
  14   2  -6   17.41    1.81
  14  -2  -6   23.24    2.06
 -14  -2   6   21.37    1.91
  14   2   6   25.23    2.03
 -14   2  -6   20.01    2.04
 -16  -2  -6   22.55    2.28
  16  -2   6   29.26    2.37
  16   2  -6   31.46    2.65
  16  -2  -6   30.74    2.60
  16   2   6   30.22    2.52
 -16  -2   6   26.12    2.27
 -16   2  -6   27.11    2.55
  18  -2   6    1.36    1.69
 -18  -2  -6    1.95    1.60
  18   2  -6    3.53    1.82
  18  -2  -6    1.03    1.67
  18   2   6    2.17    1.86
 -18   2  -6    2.40    1.70
   1  -3   6   10.22    0.77
   1   3  -6   10.89    0.77
  -1  -3  -6   11.07    0.84
  -1   3   6   11.99    0.82
   1  -3   6   10.64    0.85
  -1   3  -6   11.04    0.72
   1  -3  -6   11.99    0.88
  -1  -3   6   11.52    0.91
  -1  -3   6   10.67    0.82
   1   3   6   12.15    0.97
  -3   3   6  167.19    5.85
  -3  -3  -6  166.15    5.79
   3  -3   6  167.96    5.77
   3  -3   6  169.95    5.76
   3   3  -6  166.34    5.79
  -3  -3   6  162.37    5.85
   3  -3  -6  170.17    5.83
  -3   3  -6  163.70    5.71
   3   3   6  166.24    5.83
   5   3  -6  129.44    4.54
   5  -3   6  122.85    4.46
  -5  -3  -6  128.23    4.50
  -5   3   6  131.13    4.59
  -5   3  -6  125.20    4.40
   5  -3  -6  126.28    4.56
   5   3   6  122.03    4.53
  -5  -3   6  124.71    4.62
   7  -3   6   85.44    3.22
  -7  -3  -6   84.61    3.28
  -7   3   6   87.11    3.43
   7   3  -6   86.87    3.38
   7  -3   6   85.94    3.26
   7   3   6   87.85    3.37
  -7  -3   6   90.49    3.53
   7  -3  -6   88.52    3.39
  -7   3  -6   88.31    3.20
   9  -3   6   99.79    3.60
  -9  -3  -6   95.42    3.65
   9  -3   6   91.98    3.61
   9   3  -6   95.58    3.75
  -9   3   6   95.67    3.80
  -9  -3   6   93.79    3.91
   9  -3  -6   93.84    3.75
   9   3   6   92.39    3.71
  -9   3  -6   92.07    3.52
 -11  -3  -6    3.95    1.04
  11   3  -6    2.53    0.95
 -11  -3  -6    4.27    0.90
  11  -3   6    2.46    0.84
 -11   3   6    3.15    0.97
 -11  -3   6    3.61    1.09
 -11   3  -6    2.78    1.07
  11   3   6    2.54    0.91
  11  -3  -6    4.20    1.02
 -11   3  -6    3.48    0.80
 -13  -3  -6   34.83    2.30
  13  -3   6   34.15    2.28
 -13   3   6   35.41    2.45
 -13  -3  -6   34.34    2.51
  13   3  -6   35.23    2.57
 -13   3  -6   34.65    2.64
  13  -3  -6   39.43    2.60
 -13  -3   6   35.07    2.63
  13   3   6   34.81    2.44
  15  -3   6   11.82    1.64
 -15   3   6   13.55    1.59
  15   3  -6   11.60    1.66
 -15  -3  -6   15.10    1.83
  15  -3  -6   12.43    1.73
  15   3   6   12.85    1.82
 -15  -3   6   17.46    1.95
 -15   3  -6   13.76    1.94
  17   3  -6    0.36    1.72
 -17  -3  -6    2.25    1.52
  17  -3   6   -0.03    1.55
  17   3   6    0.50    1.65
 -17   3  -6    0.11    1.48
  17  -3  -6    3.09    1.82
 -17  -3   6    0.28    1.51
   0   4  -6    4.98    0.47
   0  -4   6    4.88    0.52
   0  -4  -6    4.80    0.61
   0   4   6    3.88    0.61
   0  -4   6    4.17    0.56
   2  -4   6    7.52    0.60
   2  -4   6    7.54    0.65
   2   4  -6    7.59    0.61
  -2   4   6    7.39    0.76
  -2  -4  -6    7.73    0.64
  -2  -4   6    9.20    0.71
  -2   4  -6    6.83    0.54
  -2  -4   6    7.96    0.74
   2  -4  -6    6.93    0.67
   2   4   6    7.80    0.68
  -4   4   6   35.10    1.74
   4   4  -6   40.59    1.68
  -4  -4  -6   40.55    1.67
   4  -4   6   40.99    1.59
   4  -4   6   36.23    1.59
   4   4   6   36.32    1.71
   4  -4  -6   38.74    1.74
  -4   4  -6   35.80    1.50
  -4  -4   6   37.72    1.78
  -6  -4  -6   44.87    1.93
   6  -4   6   44.70    1.84
   6   4  -6   46.00    2.00
  -6   4   6   44.56    2.06
  -6  -4  -6   46.30    1.70
   6  -4   6   44.50    1.89
  -6   4  -6   42.18    1.79
  -6  -4   6   47.95    2.20
   6   4   6   45.15    2.02
   6  -4  -6   48.67    2.06
  -8  -4  -6   22.58    1.40
   8   4  -6   22.18    1.51
   8  -4   6   21.08    1.24
  -8   4   6   21.36    1.59
   8  -4   6   23.62    1.39
   8   4   6   20.67    1.53
   8  -4  -6   21.58    1.55
  -8   4  -6   21.44    1.20
  -8  -4   6   21.86    1.71
  10   4  -6   35.81    2.07
 -10  -4  -6   36.02    1.97
  10  -4   6   33.41    1.72
 -10   4   6   32.78    2.05
  10  -4   6   28.92    1.81
  10   4   6   36.55    2.04
 -10   4  -6   33.51    1.72
 -10  -4   6   32.85    2.23
  10  -4  -6   33.68    2.12
 -12  -4  -6    8.91    1.28
 -12  -4  -6    6.67    1.12
  12  -4   6    7.03    1.08
 -12   4   6    8.01    1.28
  12   4  -6    8.91    1.36
 -12   4  -6    7.66    1.25
  12  -4  -6    5.89    1.24
  12   4   6    8.22    1.20
 -12  -4   6    7.00    1.37
  14   4  -6   48.07    3.09
 -14  -4  -6   45.87    3.02
  14  -4   6   47.52    2.81
 -14   4   6   50.93    2.89
 -14  -4   6   53.35    3.14
  14  -4  -6   50.43    3.09
 -14   4  -6   48.59    3.18
  14   4   6   53.22    3.04
  16   4  -6    0.51    1.46
 -16  -4  -6    1.82    1.36
  16  -4   6    3.13    1.44
 -16  -4   6    1.76    1.39
  16   4   6    1.65    1.68
  16  -4  -6    1.30    1.57
 -16   4  -6    2.70    1.50
 -18  -4  -6    0.14    1.47
  18   4  -6    2.29    1.72
  18  -4   6   -0.23    1.66
 -18   4  -6    1.14    1.67
  18   4   6    0.07    1.76
  18  -4  -6    1.49    1.81
   1  -5   6   18.17    1.06
  -1   5   6   19.29    1.19
   1  -5   6   19.27    0.99
   1   5  -6   19.86    0.98
   1   5   6   19.03    1.18
  -1   5  -6   20.20    0.93
  -1  -5   6   20.18    1.11
  -1  -5   6   19.70    0.91
  -1  -5   6   20.21    1.04
   1  -5  -6   19.04    1.15
  -3   5   6   60.92    2.44
  -3  -5  -6   59.88    2.37
   3   5  -6   63.02    2.35
   3  -5   6   61.97    2.30
   3  -5   6   60.93    2.27
  -3  -5   6   61.75    2.37
  -3  -5   6   59.97    2.42
  -3   5  -6   58.75    2.21
   3  -5  -6   61.57    2.42
   3   5   6   60.22    2.44
   5   5  -6    3.51    0.58
  -5  -5  -6    3.69    0.55
  -5   5   6    3.59    0.69
   5  -5   6    3.08    0.46
   5  -5   6    3.29    0.54
  -5  -5  -6    3.16    0.39
  -5   5  -6    3.60    0.43
  -5  -5   6    2.79    0.70
   5  -5  -6    2.96    0.64
   5   5   6    2.91    0.65
  -7  -5  -6    9.83    0.90
   7   5  -6   10.89    0.95
  -7   5   6   10.91    0.97
   7  -5   6   10.86    0.84
  -7  -5  -6   10.15    0.77
   7  -5   6    8.95    0.78
  -7  -5   6   10.36    1.16
  -7   5  -6   10.68    0.74
   7   5   6    8.40    0.89
   7  -5  -6   10.27    1.02
   9   5  -6    1.61    0.76
   9  -5   6    3.30    0.72
  -9   5   6    2.72    0.80
   9  -5   6    2.12    0.59
  -9  -5  -6    4.71    0.78
   9  -5  -6    3.32    0.85
  -9   5  -6    3.79    0.65
   9   5   6    1.55    0.73
  -9  -5   6    3.32    1.10
 -11  -5  -6    0.15    0.85
 -11  -5  -6   -0.38    0.85
  11  -5   6    0.39    0.76
  11   5  -6   -0.25    0.88
 -11   5   6   -0.80    0.87
 -11  -5   6   -0.65    0.99
 -11   5  -6    0.62    0.98
  11  -5  -6   -3.10    0.98
  11   5   6   -0.72    0.81
 -13   5   6   18.57    1.63
 -13  -5  -6   16.66    1.63
  13  -5   6   13.67    1.44
  13   5  -6   15.37    1.60
 -13  -5  -6   14.20    1.51
 -13  -5   6   13.35    1.74
  13   5   6   13.53    1.57
  13  -5  -6   12.55    1.52
 -13   5  -6   12.82    1.67
 -15  -5  -6    2.67    1.32
  15   5  -6    1.59    1.49
  15  -5   6    2.97    1.34
  15  -5  -6    3.03    1.57
 -15  -5   6    2.17    1.39
 -15   5  -6    3.34    1.51
  15   5   6    1.12    1.41
 -17  -5  -6    0.94    1.40
  17   5  -6   -0.64    1.47
  17  -5   6    0.81    1.52
 -17   5  -6    0.66    1.63
 -17  -5   6    2.09    1.47
  17  -5  -6    0.15    1.62
  17   5   6    1.92    1.68
   0  -6   6    1.77    0.47
   0   6   6    2.17    0.56
   0   6  -6    1.79    0.35
   0  -6  -6    1.98    0.49
   0  -6   6    1.72    0.35
   0  -6   6    2.06    0.43
  -2   6   6   16.28    1.14
   2  -6   6   15.99    0.88
   2  -6   6   15.39    0.95
  -2  -6  -6   15.89    1.07
   2   6  -6   15.92    0.94
  -2   6  -6   15.94    0.81
  -2  -6   6   18.18    1.02
  -2  -6   6   16.24    0.87
   2  -6  -6   19.29    1.13
  -2  -6   6   15.86    1.10
   2   6   6   15.76    1.16
   2   6   6   16.78    0.82
  -4  -6  -6   48.54    1.77
   4  -6   6   47.21    1.86
   4  -6   6   45.78    1.88
  -4  -6  -6   45.42    2.01
   4   6  -6   49.40    1.97
  -4   6   6   48.32    2.07
   4  -6  -6   50.11    2.07
  -4  -6   6   50.87    2.15
   4   6   6   50.20    2.11
  -4   6  -6   47.38    1.79
   6   6  -6   32.11    1.63
   6  -6   6   32.04    1.40
  -6   6   6   33.27    1.70
  -6  -6  -6   31.95    1.60
  -6  -6  -6   32.92    1.34
   6  -6   6   30.03    1.46
   6  -6  -6   30.72    1.70
  -6   6  -6   33.64    1.36
   6   6   6   32.67    1.73
  -6  -6   6   33.82    1.86
   8  -6   6   14.54    1.02
  -8   6   6   14.10    1.17
  -8  -6  -6   14.07    1.16
  -8  -6  -6   11.96    0.95
   8  -6   6   14.85    1.00
   8   6  -6   12.76    1.05
  -8  -6   6   14.03    1.32
   8   6   6   12.01    1.09
   8  -6  -6   12.91    1.11
  -8   6  -6   11.32    0.96
  10  -6   6   38.35    1.82
  10  -6   6   38.21    1.94
  10   6  -6   36.80    2.20
 -10   6   6   37.38    2.20
 -10  -6  -6   36.22    2.08
  10  -6  -6   37.60    2.25
 -10  -6   6   37.12    2.49
  10   6   6   34.10    2.17
 -10   6  -6   40.17    1.86
 -12  -6  -6   16.56    1.55
  12   6  -6   12.33    1.40
 -12   6   6   14.12    1.52
 -12  -6  -6   21.12    1.64
  12  -6   6   13.95    1.30
  12  -6  -6   14.11    1.50
  12   6   6   17.21    1.51
 -12   6  -6   12.19    1.49
 -12  -6   6   11.78    1.56
 -14   6   6    7.62    1.40
 -14  -6  -6    8.48    1.45
 -14  -6  -6    7.40    1.38
  14   6  -6    8.66    1.59
  14  -6   6    6.13    1.34
  14  -6  -6    4.83    1.39
  14   6   6    9.08    1.50
 -14  -6   6   10.00    1.64
 -14   6  -6    6.81    1.49
 -16  -6  -6    0.82    1.32
  16  -6   6    0.65    1.35
  16   6  -6   -0.34    1.52
 -16   6  -6    1.67    1.65
  16   6   6    1.11    1.56
 -16  -6   6    3.05    1.65
  16  -6  -6   -0.42    1.67
  18   6  -6    3.17    1.77
 -18  -6  -6    1.47    1.48
  18  -6   6    1.94    1.67
 -18   6  -6    2.78    1.76
  18   6   6    1.42    1.88
  18  -6  -6    1.89    1.82
 -18  -6   6    1.59    1.48
   1  -7   6   47.86    1.93
  -1  -7  -6   46.30    2.01
  -1   7   6   50.43    2.09
   1  -7   6   52.45    1.92
   1   7  -6   50.17    1.90
   1   7   6   48.51    1.84
  -1  -7   6   52.27    1.96
  -1  -7   6   51.59    1.85
   1  -7  -6   49.86    2.06
   1   7   6   47.59    2.08
  -1  -7   6   48.18    1.99
  -1   7  -6   49.31    1.84
   3  -7   6    7.01    0.59
   3   7  -6    7.56    0.62
  -3   7   6    6.55    0.71
  -3  -7  -6    8.66    0.79
   3  -7   6    7.67    0.58
  -3   7  -6    6.59    0.53
   3   7   6    7.32    0.72
  -3  -7   6    8.66    0.72
   3  -7  -6    6.05    0.70
  -3  -7   6    6.38    0.76
  -5  -7  -6    5.32    0.65
   5  -7   6    4.67    0.50
  -5   7   6    5.34    0.71
   5  -7   6    4.67    0.55
   5   7  -6    5.85    0.66
  -5  -7  -6    6.29    0.53
   5   7   6    6.51    0.79
  -5  -7   6    5.98    0.88
   5  -7  -6    5.61    0.73
  -7  -7  -6   64.59    2.32
   7  -7   6   57.80    2.34
   7   7  -6   63.51    2.59
  -7   7   6   61.72    2.62
  -7  -7  -6   61.43    2.60
   7  -7   6   59.90    2.40
  -7  -7   6   64.49    2.86
   7   7   6   64.26    2.71
   7  -7  -6   62.01    2.65
  -9  -7  -6  233.81    8.11
   9   7  -6  243.29    8.46
  -9   7   6  237.43    8.44
   9  -7   6  240.76    8.25
   9  -7   6  230.41    8.26
  -9  -7  -6  245.21    8.43
   9  -7  -6  238.46    8.46
   9   7   6  237.83    8.49
  -9  -7   6  246.58    8.67
  11  -7   6   15.22    1.23
 -11  -7  -6   16.26    1.46
  11   7  -6   15.30    1.48
 -11  -7  -6   15.87    1.43
 -11   7   6   17.76    1.54
 -11  -7   6   16.87    1.78
  11  -7  -6   17.94    1.62
  11   7   6   17.56    1.65
 -11   7  -6   15.08    1.57
 -13   7   6   33.67    2.37
  13  -7   6   32.78    2.23
 -13  -7  -6   34.44    2.39
  13   7  -6   32.26    2.51
 -13  -7  -6   31.63    2.40
  13  -7  -6   31.11    2.51
 -13  -7   6   32.32    2.72
 -13   7  -6   35.12    2.73
  13   7   6   31.77    2.57
  15   7  -6   14.96    1.91
 -15  -7  -6   11.66    1.64
  15  -7   6   10.78    1.59
  15  -7  -6   10.12    1.75
 -15  -7   6   14.75    2.03
  15   7   6   12.42    1.84
 -15   7  -6   10.22    1.80
  17  -7   6   30.54    2.38
  17   7  -6   31.31    2.56
 -17  -7  -6   33.98    2.90
 -17   7  -6   26.84    2.64
 -17  -7   6   27.33    2.40
  17  -7  -6   31.80    2.82
  17   7   6   39.35    2.91
   0  -8   6   19.65    1.00
   0  -8  -6   19.79    1.20
   0   8   6   19.47    0.99
   0  -8   6   19.01    0.93
   0   8   6   18.29    1.23
   0  -8   6   17.79    1.08
   0   8  -6   18.68    0.89
   2  -8   6   14.04    0.82
  -2  -8  -6   15.29    1.09
  -2   8   6   15.32    1.14
   2  -8   6   14.39    0.91
   2   8  -6   16.01    0.89
   2  -8  -6   14.30    1.08
  -2  -8   6   10.84    0.81
  -2   8  -6   13.55    0.82
   2   8   6   13.97    0.86
  -2  -8   6   14.95    1.08
  -2  -8   6   14.84    0.94
   2   8   6   15.92    1.17
   4   8  -6   11.31    0.90
   4  -8   6   10.07    0.81
  -4   8   6   11.25    0.91
  -4  -8  -6   11.33    0.95
   4  -8   6   10.54    0.71
  -4  -8   6   11.27    0.96
  -4   8  -6   10.12    0.73
  -4  -8   6   12.19    0.88
   4  -8  -6    9.61    0.84
   4   8   6   12.91    1.00
   6   8  -6    6.93    0.79
  -6   8   6    7.09    0.85
  -6  -8  -6    8.39    0.65
  -6  -8  -6    7.39    0.79
   6  -8   6    7.52    0.65
  -6  -8   6    9.17    1.07
   6  -8  -6    6.86    0.88
   6   8   6    6.59    0.88
   8   8  -6   51.76    2.37
   8  -8   6   51.48    2.11
  -8  -8  -6   52.52    2.10
  -8   8   6   53.23    2.40
  -8  -8  -6   51.78    2.39
   8  -8   6   51.97    2.18
   8  -8  -6   54.49    2.47
   8   8   6   54.11    2.53
  -8  -8   6   51.65    2.69
 -10  -8  -6   35.48    1.70
 -10  -8  -6   35.54    2.07
  10  -8   6   32.07    1.65
  10  -8   6   34.41    1.78
  10   8  -6   32.71    2.10
 -10   8   6   30.75    2.03
 -10  -8   6   31.17    2.46
 -10   8  -6   32.89    2.30
  10  -8  -6   28.17    2.12
  10   8   6   34.53    2.20
 -12  -8  -6    4.64    1.12
  12   8  -6    4.49    1.13
  12  -8   6    3.20    0.99
 -12   8   6    2.58    0.99
 -12  -8  -6    4.12    1.16
  12   8   6    3.86    1.18
 -12  -8   6    3.78    1.30
 -12   8  -6    4.07    1.32
  12  -8  -6    3.35    1.16
 -14  -8  -6    1.44    1.29
 -14  -8  -6    3.81    1.24
  14   8  -6    1.66    1.30
  14  -8   6    2.26    1.19
 -14   8  -6    2.20    1.37
 -14  -8   6    3.21    1.53
  14  -8  -6    4.67    1.45
  14   8   6    3.38    1.55
  16   8  -6    5.62    1.62
 -16  -8  -6   10.16    1.59
  16  -8   6    8.46    1.62
 -16   8  -6    7.50    1.83
 -16  -8   6    6.57    1.74
  16  -8  -6   10.95    1.95
  16   8   6   10.94    1.89
  -1  -9  -6   26.28    1.45
   1  -9   6   27.93    1.24
   1   9  -6   28.64    1.22
   1  -9   6   27.03    1.30
  -1   9   6   29.68    1.52
   1   9   6   29.21    1.54
  -1  -9   6   27.86    1.30
   1  -9  -6   29.36    1.48
  -1  -9   6   28.36    1.39
   1   9   6   29.18    1.27
  -3   9   6   12.77    0.96
   3  -9   6   12.69    0.79
   3  -9   6   12.87    0.88
  -3  -9  -6   12.40    1.00
   3   9  -6   14.39    0.92
  -3  -9   6   15.25    1.19
   3  -9  -6   11.49    0.94
  -3  -9   6   13.48    0.94
  -3  -9   6   15.93    1.05
   3   9   6   15.36    0.93
  -3   9  -6   13.23    0.84
   3   9   6   16.32    1.23
   5  -9   6   17.01    0.89
  -5   9   6   15.12    1.26
  -5  -9  -6   17.74    0.97
   5  -9   6   15.74    0.94
  -5  -9  -6   16.88    1.24
   5   9  -6   16.08    1.13
   5  -9  -6   17.20    1.28
   5   9   6   12.38    1.03
  -5  -9   6   15.31    1.23
  -5   9  -6   14.51    0.91
  -7  -9  -6   13.86    0.99
   7  -9   6   16.07    0.92
  -7   9   6   13.23    1.08
  -7  -9  -6   14.26    1.09
   7  -9   6   14.31    1.03
   7   9  -6   14.35    1.07
  -7  -9   6   13.72    1.36
   7  -9  -6   14.28    1.13
   7   9   6   13.10    1.11
   9  -9   6   56.65    2.44
  -9   9   6   60.42    2.66
   9  -9   6   57.64    2.37
  -9  -9  -6   60.73    2.70
   9   9  -6   56.80    2.71
  -9  -9  -6   60.10    2.40
   9   9   6   61.20    2.84
  -9  -9   6   61.47    3.08
   9  -9  -6   60.58    2.75
  11  -9   6    2.85    0.84
 -11  -9  -6    2.03    1.03
 -11  -9  -6    1.69    0.94
  11   9  -6    1.24    1.08
 -11   9   6    0.89    0.95
  11  -9  -6    1.77    1.11
  11   9   6    1.54    1.13
 -11  -9   6    1.08    1.23
 -11   9  -6    2.84    1.16
 -13  -9  -6   16.47    1.67
 -13  -9  -6   19.56    1.69
  13  -9   6   16.11    1.52
  13   9  -6   18.68    1.81
  13  -9  -6   16.80    1.77
 -13   9  -6   17.98    1.97
  13   9   6   19.31    1.80
 -13  -9   6   18.65    1.94
  15  -9   6   10.59    1.53
  15   9  -6    9.25    1.63
 -15  -9  -6   10.35    1.54
  15   9   6    9.20    1.79
 -15  -9   6    9.32    1.83
  15  -9  -6    9.38    1.93
 -15   9  -6   11.58    2.00
  17  -9   6   18.54    1.98
 -17  -9  -6   16.72    1.93
  17   9  -6   16.75    2.06
 -17   9  -6   16.04    2.34
  17  -9  -6   15.77    2.23
 -17  -9   6   24.03    2.53
  17   9   6   18.08    2.30
   0 -10   6    3.43    0.49
   0 -10   6    2.51    0.51
   0 -10  -6    2.56    0.60
   0  10  -6    1.82    0.32
   0  10   6    2.55    0.52
   0 -10   6    2.01    0.42
   0  10   6    2.75    0.64
   2 -10   6    9.61    0.72
   2  10  -6   11.42    0.79
   2 -10   6    9.08    0.68
  -2  10   6   10.63    0.91
  -2 -10  -6   10.43    0.90
  -2 -10   6   11.04    0.87
   2  10   6    8.14    0.86
  -2 -10   6    9.70    0.85
   2 -10  -6    9.19    0.85
  -2 -10   6   11.04    0.81
  -2  10  -6   10.32    0.83
   2  10   6   10.53    0.86
   4 -10   6   39.65    1.67
  -4 -10  -6   43.10    2.01
   4 -10   6   40.04    1.71
  -4  10   6   42.53    2.00
   4  10  -6   43.99    1.83
  -4 -10   6   42.23    1.83
   4  10   6   48.16    2.09
  -4 -10   6   46.51    1.96
  -4  10  -6   44.87    1.73
   4 -10  -6   45.30    2.02
  -4 -10   6   48.32    2.14
  -6 -10  -6   18.69    1.39
  -6  10   6   17.54    1.21
   6  10  -6   17.42    1.24
   6 -10   6   17.14    0.93
   6 -10   6   16.60    1.00
  -6 -10  -6   17.83    1.06
  -6 -10   6   16.04    1.39
   6  10   6   16.71    1.26
   6 -10  -6   15.99    1.21
   8  10  -6   37.39    2.00
   8 -10   6   35.75    1.61
  -8 -10  -6   39.93    1.73
  -8 -10  -6   39.08    2.06
  -8  10   6   37.01    2.01
   8 -10   6   38.15    1.72
  -8 -10   6   41.97    2.43
   8  10   6   40.56    2.20
   8 -10  -6   33.41    2.04
 -10 -10  -6   79.19    3.31
  10  10  -6   66.77    3.14
  10 -10   6   63.21    2.73
  10 -10   6   68.74    2.82
 -10 -10  -6   72.82    3.17
 -10  10   6   70.09    3.06
 -10 -10   6   69.05    3.48
  10 -10  -6   70.34    3.17
  10  10   6   70.55    3.30
 -10  10  -6   66.83    3.56
  12  10  -6    1.98    1.17
 -12  10   6    1.43    0.95
 -12 -10  -6    0.99    1.10
 -12 -10  -6    1.75    1.01
  12 -10   6    1.70    0.97
  12 -10  -6    0.93    1.15
 -12  10  -6    0.54    1.26
 -12 -10   6    1.11    1.25
  12  10   6    1.90    1.27
  14 -10   6   18.84    1.66
 -14 -10  -6   18.43    1.81
  14  10  -6   16.20    1.87
 -14 -10  -6   21.71    1.89
 -14  10  -6   20.14    2.12
 -14 -10   6   20.80    2.01
  14 -10  -6   17.71    1.91
  14  10   6   18.44    2.09
  16 -10   6    6.47    1.50
 -16 -10  -6    4.81    1.43
  16  10  -6    7.42    1.67
  16 -10  -6    2.89    1.88
 -16  10  -6    3.73    1.72
  16  10   6    5.27    1.84
 -16 -10   6    7.12    1.81
   1 -11   6    4.99    0.56
   1  11  -6    4.76    0.46
  -1  11   6    3.81    0.68
   1 -11   6    4.96    0.51
  -1 -11  -6    3.45    0.69
  -1 -11   6    4.13    0.58
  -1 -11   6    4.96    0.65
   1  11   6    5.26    0.77
   1 -11  -6    5.28    0.72
   1  11   6    4.25    0.58
  -1 -11   6    3.97    0.55
   3  11  -6   50.06    1.98
  -3  11   6   50.17    2.19
   3 -11   6   48.46    1.87
  -3 -11  -6   48.52    2.20
   3 -11   6   49.05    1.90
   3 -11  -6   49.50    2.19
   3  11   6   50.26    2.00
  -3 -11   6   51.90    2.11
  -3 -11   6   50.40    2.23
   3  11   6   50.35    2.24
  -3 -11   6   49.39    2.02
  -3  11  -6   47.34    1.93
  -5 -11  -6   27.89    1.30
  -5 -11  -6   26.72    1.58
   5 -11   6   24.19    1.11
  -5  11   6   24.01    1.53
   5  11  -6   24.89    1.39
   5  11   6   27.13    1.69
  -5 -11   6   25.52    1.74
  -5 -11   6   22.16    1.38
  -5  11  -6   26.92    1.25
   5 -11  -6   25.12    1.59
  -7 -11  -6   39.02    2.03
  -7  11   6   37.25    1.97
   7  11  -6   37.44    1.89
   7 -11   6   38.12    1.64
  -7 -11  -6   38.23    1.71
   7  11   6   38.15    2.15
  -7 -11   6   38.41    2.31
   7 -11  -6   36.22    2.04
   9  11  -6   20.38    1.72
   9 -11   6   20.97    1.25
   9 -11   6   20.64    1.35
  -9 -11  -6   21.07    1.78
  -9  11   6   20.16    1.64
   9  11   6   21.93    1.75
  -9 -11   6   19.19    1.74
   9 -11  -6   21.83    1.78
 -11 -11  -6    1.81    0.94
 -11  11   6    2.60    0.92
 -11 -11  -6    2.99    1.10
  11 -11   6    3.07    0.87
  11  11  -6    1.48    1.03
 -11 -11   6    1.98    1.27
  11  11   6    3.55    1.31
 -11  11  -6    2.45    1.13
  11 -11  -6    2.44    1.16
 -13 -11  -6    1.40    1.21
  13 -11   6    4.04    1.14
 -13 -11  -6    3.89    1.16
  13  11  -6    3.25    1.24
  13 -11  -6    0.59    1.36
 -13 -11   6    2.91    1.45
 -13  11  -6    3.81    1.44
  13  11   6    2.17    1.44
 -15 -11  -6    7.39    1.63
  15  11  -6    3.44    1.38
  15 -11   6    6.19    1.40
 -15 -11  -6    2.48    1.30
  15 -11  -6    4.88    1.71
  15  11   6    3.91    1.66
 -15 -11   6    6.23    1.83
 -15  11  -6    3.15    1.52
  17  11  -6    1.52    1.57
  17 -11   6    1.20    1.52
  17 -11  -6   -1.37    1.74
 -17  11  -6    0.39    1.65
  17  11   6    0.70    2.01
 -17 -11   6   -1.51    1.72
   0 -12   6   16.27    1.11
   0 -12   6   17.86    1.05
   0 -12   6   18.74    1.05
   0 -12  -6   16.78    1.26
   0  12   6   16.53    1.12
   0  12   6   18.07    1.34
  -2 -12  -6   21.71    1.43
   2 -12   6   20.33    1.03
   2  12  -6   22.08    1.07
   2 -12   6   19.57    1.10
  -2  12   6   21.98    1.40
  -2  12  -6   21.39    1.21
  -2 -12   6   23.15    1.27
  -2 -12   6   22.90    1.23
   2 -12  -6   21.88    1.43
  -2 -12   6   21.05    1.39
   2  12   6   21.12    1.46
   2  12   6   22.17    1.23
  -4 -12  -6   88.31    3.36
   4  12  -6   82.93    3.15
  -4  12   6   86.73    3.34
  -4  12  -6   83.25    3.08
   4 -12  -6   83.22    3.34
  -4 -12   6   88.16    3.32
  -4 -12   6   85.09    3.41
  -4 -12   6   83.27    3.17
  -6  12   6   16.10    1.19
   6  12  -6   19.19    1.24
  -6 -12  -6   13.79    1.12
  -6 -12  -6   19.87    1.47
  -6 -12   6   15.69    1.35
   6 -12  -6   11.99    1.14
  -6  12  -6   12.79    1.08
   6  12   6   17.57    1.35
  -8  12   6   11.04    1.07
   8 -12   6   11.97    0.91
   8  12  -6   12.94    1.19
  -8 -12  -6   11.85    1.20
   8 -12   6   11.85    0.85
   8 -12  -6   10.50    1.18
   8  12   6   15.27    1.48
  -8 -12   6   11.08    1.37
 -10 -12  -6    0.51    1.08
 -10  12   6    1.09    0.84
 -10 -12  -6    0.29    0.81
  10  12  -6   -0.32    0.94
  10 -12   6    0.33    0.61
  10 -12   6    1.50    0.74
  10 -12  -6   -0.02    0.97
 -10 -12   6   -0.62    1.17
 -10  12  -6   -0.03    1.11
  10  12   6    1.04    1.14
  12  12  -6    3.64    1.23
 -12 -12  -6    3.47    1.05
  12 -12   6    3.05    1.02
 -12 -12  -6    2.95    1.28
 -12  12  -6    5.29    1.41
  12 -12  -6    1.61    1.18
  12  12   6    1.65    1.34
 -12 -12   6    3.57    1.38
  14  12  -6   11.13    1.71
 -14 -12  -6   15.91    1.79
  14 -12   6   14.73    1.55
 -14 -12  -6   14.99    1.61
 -14 -12   6   17.02    1.90
 -14  12  -6   14.26    2.05
  14 -12  -6   17.34    1.90
  14  12   6   14.06    1.85
  16  12  -6    1.63    1.42
  16 -12   6    3.14    1.48
 -16 -12   6    3.98    1.74
  16  12   6    4.13    1.85
 -16  12  -6    0.68    1.77
  16 -12  -6    1.44    1.78
   1 -13   6    3.07    0.49
   1 -13   6    2.61    0.54
  -1  13   6    3.27    0.77
  -1 -13  -6    2.98    0.73
  -1  13   6    4.14    0.64
  -1 -13   6    2.80    0.65
  -1 -13   6    3.66    0.59
  -1  13  -6    3.62    0.62
   1  13   6    4.26    0.63
   1 -13  -6    3.00    0.73
   1  13   6    3.74    0.78
  -1 -13   6    3.18    0.59
  -3  13   6   94.97    3.54
   3  13  -6   89.64    3.32
  -3 -13  -6   92.59    3.59
  -3  13  -6   85.87    3.30
   3  13   6   94.09    3.61
   3  13   6   93.27    3.37
  -3 -13   6   90.28    3.39
   3 -13  -6   91.26    3.56
  -3 -13   6   91.74    3.57
  -3 -13   6   92.85    3.49
  -5 -13  -6  143.84    5.03
   5  13  -6  140.72    5.12
  -5  13   6  142.30    5.24
  -5 -13  -6  143.96    5.29
   5 -13  -6  142.13    5.27
   5  13   6  143.01    5.33
  -5  13  -6  137.94    4.98
  -5 -13   6  151.50    5.42
  -5 -13   6  149.51    5.30
  -7  13   6   18.29    1.35
   7  13  -6   19.54    1.43
  -7 -13  -6   21.54    1.70
   7  13   6   19.00    1.41
   7 -13  -6   16.65    1.33
  -7 -13   6   18.08    1.60
  -9 -13  -6   30.66    1.81
  -9 -13  -6   28.73    2.05
  -9  13   6   30.32    1.84
   9  13  -6   26.88    1.92
  -9  13  -6   28.70    2.30
   9 -13  -6   26.77    1.99
   9  13   6   28.15    2.27
  -9 -13   6   23.19    1.95
  11 -13   6    2.11    0.92
 -11 -13  -6    4.12    0.97
 -11 -13  -6    3.60    1.26
  11  13  -6    2.53    1.09
 -11  13  -6    2.21    1.24
 -11 -13   6    3.63    1.41
  11 -13  -6    0.38    1.05
  11  13   6    3.13    1.26
 -13 -13  -6   42.89    2.94
 -13 -13  -6   42.99    2.63
  13  13  -6   42.20    2.78
  13 -13   6   42.02    2.44
  13 -13  -6   42.85    2.87
  13  13   6   39.28    3.08
 -13  13  -6   38.95    3.18
 -13 -13   6   44.45    3.20
  15 -13   6   30.21    2.45
 -15 -13  -6   24.46    2.30
  15  13  -6   19.64    2.15
 -15  13  -6   20.59    2.42
  15  13   6   26.19    2.48
  15 -13  -6   21.54    2.38
 -15 -13   6   23.01    2.18
   0  14   6    1.20    0.71
   0 -14  -6    2.00    0.78
   0 -14   6    0.97    0.51
   0  14   6    2.42    0.64
   0 -14   6    1.61    0.59
   2 -14   6   69.55    2.54
   2 -14   6   65.46    2.54
   2  14  -6   69.46    2.54
  -2 -14  -6   68.99    2.86
  -2  14   6   73.84    2.86
  -2 -14   6   71.97    2.70
   2  14   6   66.79    2.67
  -2 -14   6   70.01    2.75
   2 -14  -6   70.61    2.89
  -2 -14   6   66.72    2.80
   2  14   6   67.48    2.87
  -2  14  -6   65.88    2.65
   4  14  -6  135.99    4.93
  -4 -14  -6  139.49    5.15
  -4  14   6  141.17    5.10
   4 -14  -6  134.12    5.12
  -4  14  -6  133.01    4.87
  -4 -14   6  148.62    5.15
  -4 -14   6  140.44    5.21
   4  14   6  143.94    5.21
   6  14  -6    1.45    0.62
  -6  14   6   -1.09    0.73
  -6 -14  -6    0.56    0.83
  -6 -14   6   -0.72    0.90
  -6  14  -6    1.13    0.57
   6  14   6    1.65    1.01
   6 -14  -6   -1.21    0.81
   8  14  -6   24.66    1.64
  -8 -14  -6   22.03    1.83
  -8  14   6   20.91    1.66
   8  14   6   21.87    1.73
  -8 -14   6   19.35    1.82
   8 -14  -6   18.90    1.45
  10  14  -6    1.02    0.94
 -10 -14  -6    2.44    1.02
 -10 -14  -6    0.95    0.86
 -10 -14   6    1.77    1.31
  10  14   6    0.87    1.20
 -10  14  -6    0.20    1.12
  10 -14  -6    1.72    1.09
  12 -14   6    6.24    1.09
  12  14  -6    8.63    1.38
 -12 -14  -6    6.47    1.18
 -12 -14  -6    6.01    1.34
 -12 -14   6    6.48    1.57
  12 -14  -6    6.12    1.44
  12  14   6    7.62    1.58
 -12  14  -6    7.61    1.63
 -14 -14  -6   19.44    1.97
  14 -14   6   20.15    1.67
  14  14  -6   12.86    1.77
 -14  14  -6   15.24    2.06
 -14 -14   6   18.43    2.23
  14  14   6   16.28    1.99
  14 -14  -6   17.48    1.94
  16 -14   6   13.77    1.70
 -16  14  -6   12.09    2.39
  16 -14  -6   11.78    2.23
 -16 -14   6   13.53    2.25
  16  14   6    8.94    2.09
  -1  15   6    2.68    0.80
  -1  15   6    3.24    0.71
   1 -15   6    2.32    0.56
  -1 -15  -6    3.17    0.76
   1 -15   6    4.07    0.60
  -1 -15   6    3.35    0.73
   1  15   6    3.00    0.83
  -1 -15   6    4.03    0.70
   1  15   6    3.87    0.72
  -1 -15   6    3.66    0.65
  -1  15  -6    4.29    0.75
   3  15  -6   50.71    2.04
  -3  15   6   51.75    2.35
  -3 -15  -6   51.08    2.45
   3  15   6   51.78    2.22
  -3 -15   6   55.95    2.33
  -3  15  -6   47.82    2.14
   3 -15  -6   46.51    2.39
   3  15   6   53.35    2.44
  -3 -15   6   50.84    2.42
  -5  15   6   62.32    2.67
   5  15  -6   58.40    2.47
  -5 -15  -6   61.28    2.77
  -5  15  -6   59.26    2.44
  -5 -15   6   63.27    2.92
   5  15   6   62.71    2.83
  -5 -15   6   62.70    2.79
   5 -15  -6   57.95    2.72
   7  15  -6    1.26    0.73
  -7  15   6    0.33    0.78
  -7 -15  -6    1.95    0.93
   7  15   6    1.73    1.06
  -7  15  -6    1.34    0.66
   7 -15  -6    0.88    0.94
  -7 -15   6   -0.78    1.11
  -9 -15  -6   -0.26    1.03
   9  15  -6    0.59    0.84
  -9 -15  -6    0.77    0.73
   9 -15  -6    0.12    0.95
  -9  15  -6   -1.02    1.07
   9  15   6    0.57    1.17
  -9 -15   6    0.88    1.16
 -11 -15  -6    1.82    0.91
 -11 -15  -6    1.11    1.12
  11  15  -6   -0.79    1.01
 -11  15  -6    1.09    1.29
 -11 -15   6    2.35    1.38
  11 -15  -6    0.19    1.13
  11  15   6    0.26    1.28
  13  15  -6   13.65    1.72
 -13 -15  -6   16.10    1.84
  13 -15   6   19.40    1.49
  13  15   6   11.94    1.82
  13 -15  -6   15.96    1.83
 -13 -15   6   12.23    1.91
 -13  15  -6   12.56    2.07
 -15 -15  -6   22.97    2.20
  15 -15   6   36.00    2.50
  15  15   6   27.93    2.53
 -15 -15   6   28.47    2.40
  15 -15  -6   28.46    2.53
 -15  15  -6   24.39    2.63
   0 -16   6   16.04    1.24
   0 -16   6   17.67    1.25
   0  16   6   17.27    1.28
   0 -16  -6   14.70    1.20
   0  16   6   16.11    1.33
  -2 -16  -6   36.62    2.06
  -2  16   6   40.03    2.03
  -2  16   6   41.28    1.93
  -2  16  -6   35.78    1.86
   2  16   6   40.35    1.92
   2 -16  -6   33.56    2.04
  -2 -16   6   37.74    1.99
   2  16   6   42.55    2.15
  -2 -16   6   40.27    1.95
   4  16  -6   55.33    2.35
  -4  16   6   59.82    2.63
  -4 -16  -6   62.90    2.75
  -4 -16   6   63.61    2.71
   4  16   6   58.31    2.77
   4  16   6   59.93    2.55
  -4  16  -6   56.59    2.43
   4 -16  -6   58.60    2.70
  -4 -16   6   59.66    2.81
   6  16  -6    7.34    0.86
  -6  16   6    7.24    0.98
  -6 -16  -6    7.71    1.07
   6 -16  -6    6.29    1.08
  -6 -16   6    6.96    1.30
  -6  16  -6    7.84    0.85
   6  16   6    6.24    1.11
  -8 -16  -6    0.80    0.94
   8  16  -6    1.05    0.80
  -8 -16   6   -0.12    1.17
  -8  16  -6   -0.48    1.09
   8  16   6   -0.04    1.08
   8 -16  -6    0.04    0.93
  -8  16  -6   -0.33    0.68
 -10 -16  -6    2.07    1.08
 -10 -16  -6    0.87    0.81
  10  16  -6    1.33    1.07
  10  16   6    0.12    1.27
 -10 -16   6    0.53    1.45
  10 -16  -6    0.06    1.11
 -10  16  -6    1.37    1.30
 -12 -16  -6    3.67    1.51
  12  16   6    1.31    1.46
  12 -16  -6    1.50    1.39
 -12 -16   6    2.07    1.44
 -12  16  -6   -0.15    1.49
 -14 -16  -6   22.24    2.16
  14 -16   6   32.93    2.24
 -14  16  -6   21.72    2.57
  14 -16  -6   23.48    2.28
[truncated: 228,433 more chars]
