# Supplementary material for: Unusual Square Pyramidal Chalcogenide Mo5 Cluster with Bridging Pyrazolate-Ligands
Source: Int J Mol Sci. 2023 Feb 8;24(4):3440. doi: 10.3390/ijms24043440 (PMC9962213; doi:10.3390/ijms24043440)
Supplement: Supplementary file 1 [file ijms-24-03440-s001.zip › Mo5red.cif]

data_jul081_3
_publ_requested_journal          Inorg.Chem.
_publ_contact_author_name        'Dr. Michael A. Shestopalov'
_publ_contact_author_address     
;Nikolaev Institute of Inorganic Chemistry,
SB Russian Academy of Sciences,
Akad. Lavrentiev prospekt 3,
Novosibirsk 90,
630090 Russia
;
_publ_contact_author_email       shtopy@niic.nsc.ru
_publ_contact_author_phone       7(383)3309253
_publ_contact_author_fax         7(383)3309489
loop_
_publ_author_name
_publ_author_address
'Savina, Iulia V.'
;Nikolaev Institute of Inorganic Chemistry,
SB Russian Academy of Sciences,
Akad. Lavrentiev prospekt 3,
Novosibirsk 90,
630090 Russia
;
'Ivanov, Anton A.'
;Nikolaev Institute of Inorganic Chemistry,
SB Russian Academy of Sciences,
Akad. Lavrentiev prospekt 3,
Novosibirsk 90,
630090 Russia
;
'Evtushok, Darya V.'
;Nikolaev Institute of Inorganic Chemistry,
SB Russian Academy of Sciences,
Akad. Lavrentiev prospekt 3,
Novosibirsk 90,
630090 Russia
;
'Gayfulin, Yakov M.'
;Nikolaev Institute of Inorganic Chemistry,
SB Russian Academy of Sciences,
Akad. Lavrentiev prospekt 3,
Novosibirsk 90,
630090 Russia
;
'Komarovskikh, Andrey Y.'
;Nikolaev Institute of Inorganic Chemistry,
SB Russian Academy of Sciences,
Akad. Lavrentiev prospekt 3,
Novosibirsk 90,
630090 Russia
;
'Syrokvashin, Mikhail M.'
;Nikolaev Institute of Inorganic Chemistry,
SB Russian Academy of Sciences,
Akad. Lavrentiev prospekt 3,
Novosibirsk 90,
630090 Russia
;
'Ivanova, Mariia N.'
;Nikolaev Institute of Inorganic Chemistry,
SB Russian Academy of Sciences,
Akad. Lavrentiev prospekt 3,
Novosibirsk 90,
630090 Russia
;
'Asanov, Igor P.'
;Nikolaev Institute of Inorganic Chemistry,
SB Russian Academy of Sciences,
Akad. Lavrentiev prospekt 3,
Novosibirsk 90,
630090 Russia
;
'Eltsov, Ilia V.'
;Novosibirsk State University,
2 Pirogova Str., 
Novosibirsk,
630090 Russia
;
'Kuratieva, Natalia V.'
;Nikolaev Institute of Inorganic Chemistry,
SB Russian Academy of Sciences,
Akad. Lavrentiev prospekt 3,
Novosibirsk 90,
630090 Russia
;
'Shestopalov, Michael A.'
;Nikolaev Institute of Inorganic Chemistry,
SB Russian Academy of Sciences,
Akad. Lavrentiev prospekt 3,
Novosibirsk 90,
630090 Russia
;

_audit_creation_method           SHELXL-2017/1
_shelx_SHELXL_version_number     2017/1
_chemical_name_systematic        ?
_chemical_name_common            ?
_chemical_melting_point          ?
_chemical_formula_moiety         'C27 H32 Mo5 N18 Se5, 4(C3 H4 N2), Br'
_chemical_formula_sum            'C39 H48 Br Mo5 N26 Se5'
_chemical_formula_weight         1835.44

loop_
_atom_type_symbol
_atom_type_description
_atom_type_scat_dispersion_real
_atom_type_scat_dispersion_imag
_atom_type_scat_source
C C 0.0033 0.0016 'International Tables Vol C Tables 4.2.6.8 and 6.1.1.4'
H H 0.0000 0.0000 'International Tables Vol C Tables 4.2.6.8 and 6.1.1.4'
N N 0.0061 0.0033 'International Tables Vol C Tables 4.2.6.8 and 6.1.1.4'
Se Se -0.0929 2.2259 'International Tables Vol C Tables 4.2.6.8 and 6.1.1.4'
Mo Mo -1.6832 0.6857 'International Tables Vol C Tables 4.2.6.8 and 6.1.1.4'
Br Br -0.2901 2.4595 'International Tables Vol C Tables 4.2.6.8 and 6.1.1.4'

_space_group_crystal_system      tetragonal
_space_group_IT_number           85
_space_group_name_H-M_alt        'P 4/n'
_space_group_name_Hall           '-P 4a'

_shelx_space_group_comment       
;
The symmetry employed for this shelxl refinement is uniquely defined
by the following loop, which should always be used as a source of
symmetry information in preference to the above space-group names.
They are only intended as comments.
;

loop_
_space_group_symop_operation_xyz
'x, y, z'
'-y+1/2, x, z'
'-x+1/2, -y+1/2, z'
'y, -x+1/2, z'
'-x, -y, -z'
'y-1/2, -x, -z'
'x-1/2, y-1/2, -z'
'-y, x-1/2, -z'

_cell_length_a                   15.6443(4)
_cell_length_b                   15.6443(4)
_cell_length_c                   11.3058(2)
_cell_angle_alpha                90
_cell_angle_beta                 90
_cell_angle_gamma                90
_cell_volume                     2767.03(15)
_cell_formula_units_Z            2
_cell_measurement_temperature    150(2)
_cell_measurement_reflns_used    9922
_cell_measurement_theta_min      2.58
_cell_measurement_theta_max      28.30

_exptl_crystal_description       prism
_exptl_crystal_colour            black
_exptl_crystal_density_meas      ?
_exptl_crystal_density_method    ?
_exptl_crystal_density_diffrn    2.203
_exptl_crystal_F_000             1758
_exptl_transmission_factor_min   0.574
_exptl_transmission_factor_max   0.746
_exptl_crystal_size_max          0.220
_exptl_crystal_size_mid          0.150
_exptl_crystal_size_min          0.120
_exptl_absorpt_coefficient_mu    5.171
_shelx_estimated_absorpt_T_min   0.396
_shelx_estimated_absorpt_T_max   0.576

_exptl_absorpt_correction_type   multi-scan
_exptl_absorpt_correction_T_min  ?
_exptl_absorpt_correction_T_max  ?
_exptl_absorpt_process_details   'Bruker SADABS'
_exptl_absorpt_special_details   ?
_diffrn_ambient_temperature      150(2)


_diffrn_radiation_probe          x-ray
_diffrn_radiation_type           MoK\a
_diffrn_radiation_wavelength     0.71073
_diffrn_source                   ?
_diffrn_measurement_device_type  'Bruker Apex DUO CCD area-detector'
_diffrn_measurement_method       '\f scans'
_diffrn_detector_area_resol_mean 25
_diffrn_reflns_number            21000
_diffrn_reflns_av_unetI/netI     0.0156
_diffrn_reflns_av_R_equivalents  0.0251
_diffrn_reflns_limit_h_min       -20
_diffrn_reflns_limit_h_max       19
_diffrn_reflns_limit_k_min       -20
_diffrn_reflns_limit_k_max       20
_diffrn_reflns_limit_l_min       -15
_diffrn_reflns_limit_l_max       9
_diffrn_reflns_theta_min         1.801
_diffrn_reflns_theta_max         28.298
_diffrn_reflns_theta_full        25.250
_diffrn_measured_fraction_theta_max 0.999
_diffrn_measured_fraction_theta_full 1.000
_diffrn_reflns_Laue_measured_fraction_max 0.999
_diffrn_reflns_Laue_measured_fraction_full 1.000
_diffrn_reflns_point_group_measured_fraction_max 0.999
_diffrn_reflns_point_group_measured_fraction_full 1.000
_reflns_number_total             3441
_reflns_number_gt                3142
_reflns_threshold_expression     >2\s(I)
_reflns_Friedel_coverage         0.000
_reflns_Friedel_fraction_max     .
_reflns_Friedel_fraction_full    .

_reflns_special_details          
;
 Reflections were merged by SHELXL according to the crystal
 class for the calculation of statistics and refinement.
 
 _reflns_Friedel_fraction is defined as the number of unique
 Friedel pairs measured divided by the number that would be
 possible theoretically, ignoring centric projections and
 systematic absences.
;

_computing_data_collection       'Bruker APEX2'
_computing_cell_refinement       'Bruker SAINT'
_computing_data_reduction        'Bruker SAINT'
_computing_structure_solution    'Bruker SHELXTL'
_computing_structure_refinement  'Bruker SHELXTL'
_computing_molecular_graphics    'Bruker SHELXTL'
_computing_publication_material  'Bruker SHELXTL'
_refine_special_details          ?
_refine_ls_structure_factor_coef Fsqd
_refine_ls_matrix_type           full
_refine_ls_weighting_scheme      calc
_refine_ls_weighting_details     
'w=1/[\s^2^(Fo^2^)+(0.0228P)^2^+3.9618P] where P=(Fo^2^+2Fc^2^)/3'

_atom_sites_solution_primary     direct
_atom_sites_solution_secondary   difmap
_atom_sites_solution_hydrogens   geom
_refine_ls_hydrogen_treatment    constr
_refine_ls_extinction_method     none
_refine_ls_extinction_coef       .
_refine_ls_number_reflns         3441
_refine_ls_number_parameters     183
_refine_ls_number_restraints     0
_refine_ls_R_factor_all          0.0233
_refine_ls_R_factor_gt           0.0197
_refine_ls_wR_factor_ref         0.0506
_refine_ls_wR_factor_gt          0.0493
_refine_ls_goodness_of_fit_ref   1.053
_refine_ls_restrained_S_all      1.053
_refine_ls_shift/su_max          0.001
_refine_ls_shift/su_mean         0.000

loop_
_atom_site_label
_atom_site_type_symbol
_atom_site_fract_x
_atom_site_fract_y
_atom_site_fract_z
_atom_site_U_iso_or_equiv
_atom_site_adp_type
_atom_site_occupancy
_atom_site_site_symmetry_order
_atom_site_calc_flag
_atom_site_refinement_flags_posn
_atom_site_refinement_flags_adp
_atom_site_refinement_flags_occupancy
_atom_site_disorder_assembly
_atom_site_disorder_group
Mo1 Mo 0.250000 0.250000 0.07356(3) 0.00972(7) Uani 1 4 d S T P . .
Br1 Br 0.750000 0.250000 0.500000 0.04127(15) Uani 1 4 d S T P . .
Se1 Se 0.250000 0.250000 0.36740(4) 0.01400(9) Uani 1 4 d S T P . .
Mo2 Mo 0.36895(2) 0.20176(2) 0.23085(2) 0.01050(5) Uani 1 1 d . . . . .
Se2 Se 0.31347(2) 0.09938(2) 0.07626(2) 0.01261(6) Uani 1 1 d . . . . .
N11 N 0.250000 0.250000 -0.1245(3) 0.0180(7) Uani 1 4 d S T P . .
N12 N 0.1889(3) 0.2212(4) -0.1966(4) 0.0348(12) Uani 0.25 1 d . . P . .
C12 C 0.1889(3) 0.2212(4) -0.1966(4) 0.0348(12) Uani 0.25 1 d . . P . .
C13 C 0.2108(4) 0.2316(8) -0.3141(4) 0.0369(14) Uani 0.5 1 d . . P . .
N21 N 0.49742(12) 0.14712(12) 0.19699(17) 0.0170(4) Uani 1 1 d . . . . .
N22 N 0.57155(12) 0.19144(14) 0.19375(18) 0.0218(4) Uani 1 1 d . . . . .
H22 H 0.575105 0.247541 0.196599 0.026 Uiso 1 1 calc R U . . .
C23 C 0.63892(16) 0.13889(18) 0.1856(2) 0.0282(5) Uani 1 1 d . . . . .
H23 H 0.697276 0.155541 0.182502 0.034 Uiso 1 1 calc R U . . .
C24 C 0.60834(16) 0.05651(18) 0.1827(2) 0.0281(5) Uani 1 1 d . . . . .
H24 H 0.640558 0.005203 0.176913 0.034 Uiso 1 1 calc R U . . .
C25 C 0.51984(16) 0.06469(16) 0.1899(2) 0.0226(5) Uani 1 1 d . . . . .
H25 H 0.480782 0.018198 0.189904 0.027 Uiso 1 1 calc R U . . .
N31 N 0.44102(12) 0.28297(12) 0.35226(16) 0.0161(4) Uani 1 1 d . . . . .
N32 N 0.40505(12) 0.36213(12) 0.35622(16) 0.0166(4) Uani 1 1 d . . . . .
C33 C 0.44183(15) 0.40588(15) 0.4447(2) 0.0213(5) Uani 1 1 d . . . . .
H33 H 0.427896 0.462716 0.467184 0.026 Uiso 1 1 calc R U . . .
C34 C 0.50350(17) 0.35501(16) 0.4984(2) 0.0253(5) Uani 1 1 d . . . . .
H34 H 0.539668 0.369589 0.562798 0.030 Uiso 1 1 calc R U . . .
C35 C 0.50057(15) 0.27838(15) 0.4372(2) 0.0200(4) Uani 1 1 d . . . . .
H35 H 0.535433 0.229986 0.452979 0.024 Uiso 1 1 calc R U . . .
N1S N 0.66243(16) 0.40105(16) 0.2969(2) 0.0338(5) Uani 1 1 d . . . . .
H1S H 0.670919 0.375717 0.365399 0.041 Uiso 1 1 calc R U . . .
N2S N 0.62984(16) 0.36252(17) 0.2010(2) 0.0352(5) Uani 1 1 d . . . . .
C3S C 0.62892(18) 0.4219(2) 0.1176(3) 0.0342(6) Uani 1 1 d . . . . .
H3S H 0.609425 0.412660 0.039094 0.041 Uiso 1 1 calc R U . . .
C4S C 0.65987(18) 0.4992(2) 0.1590(3) 0.0388(7) Uani 1 1 d . . . . .
H4S H 0.665531 0.551325 0.116619 0.047 Uiso 1 1 calc R U . . .
C5S C 0.6805(2) 0.4838(2) 0.2744(3) 0.0380(7) Uani 1 1 d . . . . .
H5S H 0.703296 0.524021 0.328899 0.046 Uiso 1 1 calc R U . . .

loop_
_atom_site_aniso_label
_atom_site_aniso_U_11
_atom_site_aniso_U_22
_atom_site_aniso_U_33
_atom_site_aniso_U_23
_atom_site_aniso_U_13
_atom_site_aniso_U_12
Mo1 0.00979(10) 0.00979(10) 0.00958(15) 0.000 0.000 0.000
Br1 0.0429(2) 0.0429(2) 0.0380(3) 0.000 0.000 0.000
Se1 0.01487(12) 0.01487(12) 0.01224(18) 0.000 0.000 0.000
Mo2 0.00980(9) 0.01044(9) 0.01126(9) -0.00029(6) -0.00073(6) 0.00026(6)
Se2 0.01321(10) 0.01114(10) 0.01348(10) -0.00192(7) 0.00004(7) 0.00084(7)
N11 0.0201(11) 0.0201(11) 0.0137(17) 0.000 0.000 0.000
N12 0.031(3) 0.053(3) 0.021(2) -0.003(2) -0.003(2) -0.017(2)
C12 0.031(3) 0.053(3) 0.021(2) -0.003(2) -0.003(2) -0.017(2)
C13 0.034(4) 0.057(6) 0.019(2) -0.009(3) -0.002(2) -0.002(4)
N21 0.0116(8) 0.0178(9) 0.0216(9) -0.0016(7) -0.0010(7) 0.0013(7)
N22 0.0143(9) 0.0249(10) 0.0263(10) -0.0033(8) -0.0001(8) -0.0006(8)
C23 0.0140(11) 0.0410(15) 0.0296(13) -0.0003(12) -0.0016(10) 0.0055(10)
C24 0.0232(12) 0.0321(14) 0.0290(13) -0.0002(11) -0.0003(10) 0.0144(10)
C25 0.0221(11) 0.0207(11) 0.0249(11) -0.0011(9) 0.0013(9) 0.0057(9)
N31 0.0152(9) 0.0170(9) 0.0162(9) -0.0014(7) -0.0021(7) -0.0004(7)
N32 0.0156(9) 0.0176(9) 0.0165(9) -0.0023(7) -0.0024(7) -0.0011(7)
C33 0.0235(12) 0.0192(11) 0.0211(11) -0.0061(9) -0.0039(9) -0.0038(9)
C34 0.0274(13) 0.0283(13) 0.0203(11) -0.0043(10) -0.0085(10) -0.0053(10)
C35 0.0194(11) 0.0228(11) 0.0178(10) 0.0018(9) -0.0051(9) -0.0013(9)
N1S 0.0344(13) 0.0393(13) 0.0277(11) 0.0001(10) 0.0040(10) -0.0092(10)
N2S 0.0332(13) 0.0397(14) 0.0328(12) -0.0050(11) -0.0014(10) -0.0087(11)
C3S 0.0253(13) 0.0519(18) 0.0254(13) -0.0029(12) -0.0001(11) 0.0012(12)
C4S 0.0272(14) 0.0396(16) 0.0497(18) 0.0139(14) 0.0032(13) -0.0043(12)
C5S 0.0353(16) 0.0376(16) 0.0412(17) -0.0065(13) 0.0005(13) -0.0124(12)

_geom_special_details            
;
 All esds (except the esd in the dihedral angle between two l.s. planes)
 are estimated using the full covariance matrix.  The cell esds are taken
 into account individually in the estimation of esds in distances, angles
 and torsion angles; correlations between esds in cell parameters are only
 used when they are defined by crystal symmetry.  An approximate (isotropic)
 treatment of cell esds is used for estimating esds involving l.s. planes.
;

loop_
_geom_bond_atom_site_label_1
_geom_bond_atom_site_label_2
_geom_bond_distance
_geom_bond_site_symmetry_2
_geom_bond_publ_flag
Mo1 N11 2.239(4) . ?
Mo1 Se2 2.5572(2) 4 ?
Mo1 Se2 2.5572(2) 2 ?
Mo1 Se2 2.5572(2) 3 ?
Mo1 Se2 2.5572(2) . ?
Mo1 Mo2 2.6823(3) . ?
Mo1 Mo2 2.6823(3) 2 ?
Mo1 Mo2 2.6823(3) 3 ?
Mo1 Mo2 2.6823(3) 4 ?
Se1 Mo2 2.5329(3) . ?
Se1 Mo2 2.5329(3) 4 ?
Se1 Mo2 2.5329(3) 3 ?
Se1 Mo2 2.5329(3) 2 ?
Mo2 N31 2.1838(18) . ?
Mo2 N32 2.1938(18) 4 ?
Mo2 N21 2.2174(18) . ?
Mo2 Se2 2.5207(3) 2 ?
Mo2 Se2 2.5246(3) . ?
Mo2 Mo2 2.8398(2) 2 ?
Mo2 Mo2 2.8398(2) 4 ?
N11 N12 1.334(5) 2 ?
N11 N12 1.334(5) 3 ?
N11 N12 1.334(5) 4 ?
N11 N12 1.334(5) . ?
N12 C13 1.381(7) . ?
N12 N12 1.493(7) 2 ?
N12 N12 1.493(7) 4 ?
N12 C13 1.827(10) 2 ?
N12 C13 1.828(10) 4 ?
C13 C13 0.959(8) 2 ?
C13 C13 0.959(8) 4 ?
C13 C13 1.357(11) 3 ?
N21 C25 1.339(3) . ?
N21 N22 1.352(3) . ?
N22 C23 1.340(3) . ?
N22 H22 0.8800 . ?
C23 C24 1.375(4) . ?
C23 H23 0.9500 . ?
C24 C25 1.393(3) . ?
C24 H24 0.9500 . ?
C25 H25 0.9500 . ?
N31 C35 1.340(3) . ?
N31 N32 1.361(3) . ?
N32 C33 1.342(3) . ?
C33 C34 1.390(4) . ?
C33 H33 0.9500 . ?
C34 C35 1.385(3) . ?
C34 H34 0.9500 . ?
C35 H35 0.9500 . ?
N1S N2S 1.342(3) . ?
N1S C5S 1.349(4) . ?
N1S H1S 0.8800 . ?
N2S C3S 1.323(4) . ?
C3S C4S 1.384(4) . ?
C3S H3S 0.9500 . ?
C4S C5S 1.365(4) . ?
C4S H4S 0.9500 . ?
C5S H5S 0.9500 . ?

loop_
_geom_angle_atom_site_label_1
_geom_angle_atom_site_label_2
_geom_angle_atom_site_label_3
_geom_angle
_geom_angle_site_symmetry_1
_geom_angle_site_symmetry_3
_geom_angle_publ_flag
N11 Mo1 Se2 90.685(8) . 4 ?
N11 Mo1 Se2 90.685(8) . 2 ?
Se2 Mo1 Se2 178.631(17) 4 2 ?
N11 Mo1 Se2 90.685(8) . 3 ?
Se2 Mo1 Se2 90.0 4 3 ?
Se2 Mo1 Se2 90.0 2 3 ?
N11 Mo1 Se2 90.684(8) . . ?
Se2 Mo1 Se2 90.0 4 . ?
Se2 Mo1 Se2 89.992(1) 2 . ?
Se2 Mo1 Se2 178.632(17) 3 . ?
N11 Mo1 Mo2 131.527(6) . . ?
Se2 Mo1 Mo2 121.474(10) 4 . ?
Se2 Mo1 Mo2 57.455(6) 2 . ?
Se2 Mo1 Mo2 121.380(10) 3 . ?
Se2 Mo1 Mo2 57.552(6) . . ?
N11 Mo1 Mo2 131.527(6) . 2 ?
Se2 Mo1 Mo2 121.380(10) 4 2 ?
Se2 Mo1 Mo2 57.551(6) 2 2 ?
Se2 Mo1 Mo2 57.455(6) 3 2 ?
Se2 Mo1 Mo2 121.475(10) . 2 ?
Mo2 Mo1 Mo2 63.926(7) . 2 ?
N11 Mo1 Mo2 131.527(6) . 3 ?
Se2 Mo1 Mo2 57.455(6) 4 3 ?
Se2 Mo1 Mo2 121.474(10) 2 3 ?
Se2 Mo1 Mo2 57.551(6) 3 3 ?
Se2 Mo1 Mo2 121.381(10) . 3 ?
Mo2 Mo1 Mo2 96.946(13) . 3 ?
Mo2 Mo1 Mo2 63.926(7) 2 3 ?
N11 Mo1 Mo2 131.527(6) . 4 ?
Se2 Mo1 Mo2 57.551(6) 4 4 ?
Se2 Mo1 Mo2 121.380(10) 2 4 ?
Se2 Mo1 Mo2 121.474(10) 3 4 ?
Se2 Mo1 Mo2 57.456(6) . 4 ?
Mo2 Mo1 Mo2 63.926(7) . 4 ?
Mo2 Mo1 Mo2 96.946(13) 2 4 ?
Mo2 Mo1 Mo2 63.926(7) 3 4 ?
Mo2 Se1 Mo2 68.193(9) . 4 ?
Mo2 Se1 Mo2 104.894(17) . 3 ?
Mo2 Se1 Mo2 68.193(9) 4 3 ?
Mo2 Se1 Mo2 68.193(9) . 2 ?
Mo2 Se1 Mo2 104.894(17) 4 2 ?
Mo2 Se1 Mo2 68.193(9) 3 2 ?
N31 Mo2 N32 93.56(7) . 4 ?
N31 Mo2 N21 82.23(7) . . ?
N32 Mo2 N21 82.07(7) 4 . ?
N31 Mo2 Se2 86.04(5) . 2 ?
N32 Mo2 Se2 170.27(5) 4 2 ?
N21 Mo2 Se2 88.25(5) . 2 ?
N31 Mo2 Se2 169.02(5) . . ?
N32 Mo2 Se2 86.98(5) 4 . ?
N21 Mo2 Se2 86.99(5) . . ?
Se2 Mo2 Se2 91.571(10) 2 . ?
N31 Mo2 Se1 79.80(5) . . ?
N32 Mo2 Se1 78.31(5) 4 . ?
N21 Mo2 Se1 152.38(5) . . ?
Se2 Mo2 Se1 111.128(9) 2 . ?
Se2 Mo2 Se1 111.002(9) . . ?
N31 Mo2 Mo1 127.68(5) . . ?
N32 Mo2 Mo1 127.51(5) 4 . ?
N21 Mo2 Mo1 128.52(5) . . ?
Se2 Mo2 Mo1 58.778(7) 2 . ?
Se2 Mo2 Mo1 58.735(7) . . ?
Se1 Mo2 Mo1 79.080(10) . . ?
N31 Mo2 Mo2 70.45(5) . 2 ?
N32 Mo2 Mo2 133.05(5) 4 2 ?
N21 Mo2 Mo2 135.08(5) . 2 ?
Se2 Mo2 Mo2 55.809(7) 2 2 ?
Se2 Mo2 Mo2 116.770(6) . 2 ?
Se1 Mo2 Mo2 55.904(4) . 2 ?
Mo1 Mo2 Mo2 58.037(4) . 2 ?
N31 Mo2 Mo2 134.60(5) . 4 ?
N32 Mo2 Mo2 70.03(5) 4 4 ?
N21 Mo2 Mo2 133.21(5) . 4 ?
Se2 Mo2 Mo2 116.814(6) 2 4 ?
Se2 Mo2 Mo2 55.682(7) . 4 ?
Se1 Mo2 Mo2 55.903(4) . 4 ?
Mo1 Mo2 Mo2 58.037(4) . 4 ?
Mo2 Mo2 Mo2 90.0 2 4 ?
Mo2 Se2 Mo2 68.508(9) 4 . ?
Mo2 Se2 Mo1 63.766(8) 4 . ?
Mo2 Se2 Mo1 63.713(8) . . ?
N12 N11 N12 68.1(3) 2 3 ?
N12 N11 N12 104.7(5) 2 4 ?
N12 N11 N12 68.1(3) 3 4 ?
N12 N11 N12 68.1(3) 2 . ?
N12 N11 N12 104.6(5) 3 . ?
N12 N11 N12 68.1(3) 4 . ?
N12 N11 Mo1 127.7(3) 2 . ?
N12 N11 Mo1 127.7(3) 3 . ?
N12 N11 Mo1 127.7(3) 4 . ?
N12 N11 Mo1 127.7(3) . . ?
N11 N12 C13 111.8(4) . . ?
N11 N12 N12 55.97(13) . 2 ?
C13 N12 N12 78.9(4) . 2 ?
N11 N12 N12 55.97(13) . 4 ?
C13 N12 N12 78.8(5) . 4 ?
N12 N12 N12 90.000(1) 2 4 ?
N11 N12 C13 89.3(5) . 2 ?
C13 N12 C13 31.0(3) . 2 ?
N12 N12 C13 47.9(3) 2 2 ?
N12 N12 C13 81.6(3) 4 2 ?
N11 N12 C13 89.2(4) . 4 ?
C13 N12 C13 31.0(4) . 4 ?
N12 N12 C13 81.6(3) 2 4 ?
N12 N12 C13 47.8(2) 4 4 ?
C13 N12 C13 43.6(3) 2 4 ?
C13 C13 C13 90.004(2) 2 4 ?
C13 C13 C13 45.002(2) 2 3 ?
C13 C13 C13 45.002(1) 4 3 ?
C13 C13 N12 101.1(7) 2 . ?
C13 C13 N12 101.2(7) 4 . ?
C13 C13 N12 105.9(3) 3 . ?
C13 C13 N12 98.4(5) 2 4 ?
C13 C13 N12 47.9(5) 4 4 ?
C13 C13 N12 68.2(7) 3 4 ?
N12 C13 N12 53.3(4) . 4 ?
C13 C13 N12 47.8(4) 2 2 ?
C13 C13 N12 98.4(5) 4 2 ?
C13 C13 N12 68.2(6) 3 2 ?
N12 C13 N12 53.3(4) . 2 ?
N12 C13 N12 70.6(3) 4 2 ?
C25 N21 N22 105.53(19) . . ?
C25 N21 Mo2 128.25(16) . . ?
N22 N21 Mo2 125.77(14) . . ?
C23 N22 N21 111.2(2) . . ?
C23 N22 H22 124.4 . . ?
N21 N22 H22 124.4 . . ?
N22 C23 C24 107.6(2) . . ?
N22 C23 H23 126.2 . . ?
C24 C23 H23 126.2 . . ?
C23 C24 C25 105.0(2) . . ?
C23 C24 H24 127.5 . . ?
C25 C24 H24 127.5 . . ?
N21 C25 C24 110.6(2) . . ?
N21 C25 H25 124.7 . . ?
C24 C25 H25 124.7 . . ?
C35 N31 N32 108.22(18) . . ?
C35 N31 Mo2 141.10(16) . . ?
N32 N31 Mo2 109.67(13) . . ?
C33 N32 N31 108.15(18) . . ?
C33 N32 Mo2 141.58(16) . 2 ?
N31 N32 Mo2 109.75(13) . 2 ?
N32 C33 C34 109.3(2) . . ?
N32 C33 H33 125.3 . . ?
C34 C33 H33 125.3 . . ?
C35 C34 C33 104.7(2) . . ?
C35 C34 H34 127.6 . . ?
C33 C34 H34 127.6 . . ?
N31 C35 C34 109.6(2) . . ?
N31 C35 H35 125.2 . . ?
C34 C35 H35 125.2 . . ?
N2S N1S C5S 111.0(2) . . ?
N2S N1S H1S 124.5 . . ?
C5S N1S H1S 124.5 . . ?
C3S N2S N1S 105.3(2) . . ?
N2S C3S C4S 111.6(3) . . ?
N2S C3S H3S 124.2 . . ?
C4S C3S H3S 124.2 . . ?
C5S C4S C3S 104.6(3) . . ?
C5S C4S H4S 127.7 . . ?
C3S C4S H4S 127.7 . . ?
N1S C5S C4S 107.5(3) . . ?
N1S C5S H5S 126.3 . . ?
C4S C5S H5S 126.3 . . ?

_refine_diff_density_max         1.282
_refine_diff_density_min         -1.362
_refine_diff_density_rms         0.084

_shelx_res_file                  
;
TITL jul081_3 in P4/n
    D:\job\SHESTO~1\jul081_3\jul081_3.res
    created by SHELXL-2017/1 at 13:24:12 on 28-Apr-2020
CELL 0.71073 15.6443 15.6443 11.3058 90.000 90.000 90.000
ZERR 2.0000 0.0004 0.0004 0.0002 0.000 0.000 0.000
LATT 1
SYMM 0.5-Y, X, Z
SYMM 0.5-X, 0.5-Y, Z
SYMM Y, 0.5-X, Z
SFAC C H N SE MO BR
UNIT 78 96 52 10 10 2
MERG 2
OMIT 0 180
FMAP 2
GRID
PLAN 5
TEMP -123
SIZE 0.22 0.15 0.12
EXYZ N12 C12
EADP N12 C12
BOND $H
HTAB
OMIT -3 8 1
L.S. 10
ACTA 50.5
WGHT    0.022800    3.961800
FVAR       0.06626
MO1   5    0.250000    0.250000    0.073564    10.25000    0.00979    0.00979 =
         0.00958    0.00000    0.00000    0.00000
BR1   6    0.750000    0.250000    0.500000    10.25000    0.04288    0.04288 =
         0.03804    0.00000    0.00000    0.00000
SE1   4    0.250000    0.250000    0.367399    10.25000    0.01487    0.01487 =
         0.01224    0.00000    0.00000    0.00000
MO2   5    0.368948    0.201763    0.230852    11.00000    0.00980    0.01044 =
         0.01126   -0.00029   -0.00073    0.00026
SE2   4    0.313469    0.099381    0.076263    11.00000    0.01321    0.01114 =
         0.01348   -0.00192    0.00004    0.00084
N11   3    0.250000    0.250000   -0.124466    10.25000    0.02012    0.02012 =
         0.01366    0.00000    0.00000    0.00000
N12   3    0.188947    0.221223   -0.196588    10.25000    0.03064    0.05252 =
         0.02127   -0.00319   -0.00293   -0.01712
C12   1    0.188947    0.221223   -0.196588    10.25000    0.03064    0.05252 =
         0.02127   -0.00319   -0.00293   -0.01712
C13   1    0.210758    0.231557   -0.314107    10.50000    0.03420    0.05699 =
         0.01937   -0.00876   -0.00205   -0.00198
N21   3    0.497421    0.147118    0.196991    11.00000    0.01161    0.01784 =
         0.02157   -0.00156   -0.00098    0.00125
N22   3    0.571554    0.191440    0.193750    11.00000    0.01425    0.02494 =
         0.02627   -0.00327   -0.00009   -0.00058
AFIX  43
H22   2    0.575105    0.247541    0.196599    11.00000   -1.20000
AFIX   0
C23   1    0.638921    0.138894    0.185638    11.00000    0.01405    0.04096 =
         0.02960   -0.00032   -0.00157    0.00548
AFIX  43
H23   2    0.697276    0.155541    0.182502    11.00000   -1.20000
AFIX   0
C24   1    0.608343    0.056511    0.182669    11.00000    0.02317    0.03206 =
         0.02899   -0.00020   -0.00032    0.01439
AFIX  43
H24   2    0.640558    0.005203    0.176913    11.00000   -1.20000
AFIX   0
C25   1    0.519842    0.064693    0.189941    11.00000    0.02215    0.02066 =
         0.02490   -0.00111    0.00128    0.00568
AFIX  43
H25   2    0.480782    0.018198    0.189904    11.00000   -1.20000
AFIX   0
N31   3    0.441016    0.282967    0.352261    11.00000    0.01523    0.01697 =
         0.01621   -0.00143   -0.00208   -0.00037
N32   3    0.405048    0.362125    0.356221    11.00000    0.01562    0.01761 =
         0.01654   -0.00231   -0.00239   -0.00106
C33   1    0.441826    0.405882    0.444723    11.00000    0.02347    0.01922 =
         0.02109   -0.00606   -0.00387   -0.00380
AFIX  43
H33   2    0.427896    0.462716    0.467184    11.00000   -1.20000
AFIX   0
C34   1    0.503502    0.355012    0.498383    11.00000    0.02743    0.02832 =
         0.02028   -0.00432   -0.00847   -0.00535
AFIX  43
H34   2    0.539668    0.369589    0.562798    11.00000   -1.20000
AFIX   0
C35   1    0.500569    0.278375    0.437174    11.00000    0.01936    0.02285 =
         0.01779    0.00185   -0.00513   -0.00132
AFIX  43
H35   2    0.535433    0.229986    0.452979    11.00000   -1.20000
AFIX   0
N1S   3    0.662429    0.401053    0.296905    11.00000    0.03436    0.03927 =
         0.02767    0.00010    0.00404   -0.00916
AFIX  43
H1S   2    0.670919    0.375717    0.365399    11.00000   -1.20000
AFIX   0
N2S   3    0.629841    0.362523    0.200964    11.00000    0.03323    0.03968 =
         0.03281   -0.00501   -0.00136   -0.00866
C3S   1    0.628923    0.421925    0.117632    11.00000    0.02533    0.05187 =
         0.02540   -0.00292   -0.00009    0.00117
AFIX  43
H3S   2    0.609425    0.412660    0.039094    11.00000   -1.20000
AFIX   0
C4S   1    0.659874    0.499208    0.159030    11.00000    0.02716    0.03957 =
         0.04973    0.01392    0.00318   -0.00426
AFIX  43
H4S   2    0.665531    0.551325    0.116619    11.00000   -1.20000
AFIX   0
C5S   1    0.680461    0.483824    0.274416    11.00000    0.03531    0.03759 =
         0.04118   -0.00650    0.00053   -0.01243
AFIX  43
H5S   2    0.703296    0.524021    0.328899    11.00000   -1.20000
AFIX   0
HKLF 4


REM  jul081_3 in P4/n
REM R1 =  0.0197 for    3142 Fo > 4sig(Fo)  and  0.0233 for all    3441 data
REM    183 parameters refined using      0 restraints

END

WGHT      0.0228      3.9614

REM Instructions for potential hydrogen bonds
HTAB N22 N2S
EQIV $4 -x+3/2, -y+1/2, z
HTAB C23 N1S_$4
HTAB N1S Br1

REM Highest difference peak  1.282,  deepest hole -1.362,  1-sigma level  0.084
Q1    1   0.7171  0.2300  0.4652  11.00000  0.05    1.28
Q2    1   0.7671  0.1908  0.4424  11.00000  0.05    0.46
Q3    1   0.2216  0.1802 -0.1959  11.00000  0.05    0.46
Q4    1   0.4993  0.3123  0.4789  11.00000  0.05    0.39
Q5    1   0.6468  0.4960  0.2207  11.00000  0.05    0.39
;
_shelx_res_checksum              6926

_shelx_hkl_file                  
;
   1   0   0   -0.61    0.01
   0   1   0   -0.64    0.01
  -1   0   0   -0.66    0.01
   0  -1   0   -0.65    0.01
   1   1   0  648.10   18.05
   1  -1   0  570.44   17.65
   1  -1   0  666.31   17.81
  -1   1   0  728.89   18.02
  -1   1   0  654.31   17.88
   1   1   0  685.15   16.66
  -1  -1   0  710.43   17.63
  -1  -1   0  674.34   18.48
  -1   2   0   -0.38    0.04
  -2  -1   0   -0.33    0.05
   1  -2   0   -0.27    0.05
   1  -2   0   -0.35    0.04
   2   1   0   -0.35    0.04
  -2  -1   0   -0.31    0.05
   2   1   0   -0.25    0.06
  -1   2   0   -0.34    0.04
   2   0   0  424.35   10.82
  -2   0   0  435.06   10.82
   0   2   0  448.88   10.85
  -2   0   0  394.03   10.80
   0  -2   0  441.64   10.84
   2   0   0  445.10   10.84
   0   2   0  431.32   10.83
   0  -2   0  434.69   10.84
  -1  -2   0    0.06    0.05
   1   2   0    0.18    0.05
   2  -1   0    0.02    0.04
  -1  -2   0    0.13    0.05
   1   2   0   -0.08    0.05
   2  -1   0    0.03    0.03
  -2   1   0    0.07    0.04
  -2   1   0    0.03    0.04
  -2   2   0   27.84    0.72
  -2   2   0   27.63    0.72
   2  -2   0   26.98    0.72
   2   2   0   27.25    0.73
   2   2   0   27.94    0.74
  -2  -2   0   27.42    0.73
   2  -2   0   26.47    0.72
  -2  -2   0   27.23    0.74
  -3  -2   0    0.09    0.07
  -2   3   0   -0.01    0.06
   2  -3   0   -0.03    0.06
   2  -3   0    0.01    0.06
   3   2   0    0.03    0.08
  -3  -2   0   -0.13    0.08
  -2   3   0    0.01    0.07
   3   2   0    0.01    0.08
   3   1   0   16.13    0.45
  -3  -1   0   15.48    0.45
  -1   3   0   15.10    0.44
   3   1   0   15.17    0.44
  -3  -1   0   15.52    0.45
   1  -3   0   15.44    0.44
   1  -3   0   16.20    0.44
  -1   3   0   15.49    0.44
   0  -3   0    0.04    0.06
   0   3   0    0.02    0.05
   0   3   0    0.00    0.05
   0  -3   0   -0.02    0.05
  -3   0   0   -0.01    0.05
  -3   0   0   -0.04    0.05
   3   0   0    0.04    0.05
   3   0   0    0.01    0.05
  -1  -3   0   53.32    1.32
  -3   1   0   50.16    1.31
   1   3   0   48.86    1.32
   3  -1   0   51.36    1.31
   3  -1   0   50.50    1.30
  -1  -3   0   48.08    1.32
   1   3   0   50.03    1.31
  -3   1   0   51.26    1.31
   2   3   0   -0.58    0.08
  -2  -3   0   -0.51    0.10
  -3   2   0   -0.59    0.07
  -3   2   0   -0.61    0.06
   3  -2   0   -0.41    0.07
  -2  -3   0   -0.63    0.08
   3  -2   0   -0.52    0.07
   2   3   0   -0.63    0.08
   3   3   0   85.14    2.10
  -3  -3   0   79.48    2.09
   3  -3   0   76.19    2.06
   3   3   0   79.69    2.08
  -3   3   0   79.68    2.06
  -3  -3   0   84.25    2.08
  -3   3   0   84.67    2.07
  -4  -3   0    0.00    0.09
  -3   4   0   -0.05    0.07
   3  -4   0    0.00    0.07
  -4  -3   0    0.28    0.10
   4   3   0   -0.01    0.09
  -3   4   0    0.12    0.08
   4   2   0  319.38    8.30
  -2   4   0  351.98    8.32
  -2   4   0  324.34    8.28
   2  -4   0  314.43    8.27
  -4  -2   0  299.15    8.20
  -4  -2   0  339.44    8.31
   1  -4   0   -0.02    0.07
  -4  -1   0    0.05    0.08
  -4  -1   0   -0.03    0.07
   4   1   0   -0.09    0.08
  -1   4   0    0.08    0.07
   4   1   0    0.03    0.08
  -1   4   0    0.03    0.07
   0   4   0   26.37    0.72
   4   0   0   27.57    0.72
  -4   0   0   26.79    0.72
  -4   0   0   26.20    0.72
   4   0   0   24.55    0.71
   0  -4   0   26.72    0.72
  -1  -4   0   -0.91    0.08
   1   4   0   -0.90    0.09
   1   4   0   -1.04    0.08
  -1  -4   0   -0.83    0.09
  -4   1   0   -1.06    0.08
   4  -1   0   -0.91    0.08
  -4   1   0   -0.86    0.08
   2   4   0    7.59    0.31
  -4   2   0    7.09    0.29
  -2  -4   0    7.79    0.31
   2   4   0    7.56    0.31
  -4   2   0    7.84    0.29
   4  -2   0    7.75    0.29
  -2  -4   0    7.14    0.32
  -4   3   0   -0.05    0.06
   3   4   0    0.27    0.09
   4  -3   0   -0.02    0.07
  -3  -4   0    0.11    0.11
  -4   3   0   -0.01    0.08
  -3  -4   0    0.07    0.08
  -4  -4   0   89.05    2.39
   4   4   0   93.10    2.37
   4  -4   0   87.96    2.35
  -4   4   0   97.22    2.36
  -4   4   0   94.09    2.36
   4  -5   0    0.07    0.10
  -4   5   0   -0.02    0.11
  -4   5   0    0.00    0.09
   5   4   0    0.02    0.12
  -5  -4   0    0.11    0.13
  -5  -3   0    0.83    0.14
  -3   5   0    0.22    0.10
   3  -5   0    0.26    0.11
   5   3   0    0.33    0.12
  -5  -3   0    0.02    0.12
  -3   5   0    0.24    0.12
   5   2   0   -0.66    0.10
  -2   5   0   -0.92    0.09
  -5  -2   0   -0.87    0.11
   2  -5   0   -0.83    0.08
  -5  -2   0   -0.76    0.10
   5   1   0    1.99    0.17
  -1   5   0    1.97    0.15
  -5  -1   0    1.89    0.16
  -1   5   0    2.05    0.17
  -5  -1   0    2.24    0.18
   1  -5   0    1.98    0.16
   0   5   0    0.02    0.08
  -5   0   0    0.06    0.08
   5   0   0   -0.05    0.07
  -5   0   0    0.02    0.07
   0  -5   0    0.15    0.10
   1   5   0    1.63    0.14
  -1  -5   0    1.07    0.13
  -5   1   0    0.64    0.10
  -5   1   0    0.97    0.11
   5  -1   0    0.86    0.10
  -5   2   0   -0.03    0.08
  -5   2   0   -0.03    0.09
   5  -2   0   -0.08    0.08
   2   5   0   -0.20    0.09
  -2  -5   0   -0.11    0.10
   5  -3   0    1.27    0.12
  -5   3   0    1.75    0.14
  -5   3   0    1.49    0.13
  -4  -5   0   -0.08    0.12
  -5   4   0   -0.09    0.09
   5  -4   0   -0.16    0.10
   4   5   0    0.08    0.11
  -5   4   0   -0.16    0.10
   5  -5   0    9.26    0.34
  -5   5   0    8.83    0.36
   5   5   0    9.16    0.38
  -5  -5   0    8.47    0.41
  -5   6   0   -0.15    0.14
   5  -6   0   -0.20    0.11
   6   5   0    0.15    0.15
  -6  -5   0   -0.01    0.18
   4  -6   0   51.15    1.36
  -4   6   0   52.81    1.37
   6   4   0   50.69    1.38
  -6  -4   0   50.04    1.40
  -4   6   0   48.66    1.36
  -6  -3   0   -0.12    0.13
   6   3   0    0.00    0.12
  -3   6   0   -0.11    0.10
   3  -6   0    0.11    0.11
  -3   6   0   -0.01    0.12
  -2   6   0  135.74    3.42
  -6  -2   0  129.97    3.44
  -2   6   0  130.17    3.42
  -6  -2   0  146.63    3.44
   2  -6   0  132.08    3.42
   6   2   0  132.12    3.43
  -1   6   0   -0.21    0.09
   1  -6   0   -0.03    0.10
   6   1   0   -0.14    0.10
  -6  -1   0   -0.03    0.10
  -1   6   0   -0.04    0.10
  -6  -1   0   -0.09    0.09
  -6   0   0   15.18    0.48
   0  -6   0   14.88    0.48
   0   6   0   14.85    0.48
   6   0   0   14.85    0.47
   1   6   0    0.00    0.11
  -6   1   0    0.17    0.10
  -1  -6   0    0.24    0.11
   6  -1   0    0.09    0.08
  -6   1   0    0.03    0.10
   2   6   0  441.60   11.40
  -2  -6   0  464.93   11.50
  -6   2   0  411.84   11.26
   6  -2   0  440.93   11.39
  -6   2   0  484.04   11.42
   6  -3   0    0.07    0.11
  -3  -6   0    0.10    0.14
  -6   3   0    0.55    0.11
  -6   3   0    0.01    0.11
   3   6   0    0.08    0.12
   4   6   0  542.48   13.93
  -6   4   0  596.87   17.01
  -6   4   0  554.44   14.04
   6  -4   0  544.84   13.90
  -4  -6   0  539.48   14.01
  -6   5   0   -0.18    0.15
   6  -5   0   -0.49    0.12
   5   6   0    0.03    0.15
  -5  -6   0   -0.16    0.19
  -6  -6   0   24.04    0.81
   6   6   0   23.93    0.77
   6  -6   0   24.92    0.74
  -6   6   0   24.49    0.76
  -7  -6   0   -0.40    0.18
   6  -7   0   -0.45    0.12
  -6   7   0   -0.66    0.16
   7   6   0   -0.26    0.16
   7   5   0    2.76    0.24
  -5   7   0    2.36    0.22
  -7  -5   0    1.83    0.23
   5  -7   0    3.25    0.26
  -7  -4   0    0.19    0.17
  -4   7   0    0.06    0.14
   4  -7   0   -0.07    0.12
   7   4   0    0.13    0.14
   7   3   0    7.13    0.34
   3  -7   0    7.26    0.33
  -7  -3   0    7.68    0.38
  -3   7   0    7.35    0.35
   7   2   0    0.17    0.12
  -2   7   0    0.07    0.13
  -7  -2   0    0.00    0.13
   2  -7   0   -0.13    0.11
  -1   7   0    2.98    0.24
   1  -7   0    2.99    0.23
   7   1   0    3.34    0.24
  -7  -1   0    3.23    0.23
  -7  -1   0    3.31    0.25
   7   0   0    0.07    0.10
  -7   0   0   -0.03    0.10
  -7   0   0    0.07    0.12
   0   7   0    0.08    0.12
   0  -7   0   -0.07    0.11
  -7   1   0  177.66    4.20
  -7   1   0  161.23    4.19
  -1  -7   0  165.45    4.21
   7  -1   0  165.23    4.18
   1   7   0  157.96    4.20
  -7   2   0   -0.07    0.10
   7  -2   0   -0.12    0.10
  -2  -7   0   -0.11    0.13
  -7   2   0    0.16    0.13
   2   7   0   -0.05    0.13
   7  -3   0  768.75   19.53
  -7   3   0  752.50   19.54
  -3  -7   0  769.73   19.69
   3   7   0  756.18   19.70
  -7   3   0  815.80   19.60
   4   7   0    0.18    0.14
  -7   4   0   -0.02    0.14
  -4  -7   0    0.26    0.18
   7  -4   0    0.01    0.13
  -5  -7   0  101.90    2.74
   5   7   0  100.71    2.70
  -7   5   0  107.26    2.69
   7  -5   0  104.82    2.68
   7  -6   0   -0.07    0.15
  -6  -7   0    0.26    0.20
  -7   6   0    0.20    0.17
   6   7   0   -0.03    0.16
   7   7   0   80.64    2.19
   7  -7   0   81.52    2.16
  -7   7   0   81.78    2.17
  -7  -7   0   81.60    2.23
  -8  -7   0    0.05    0.21
  -7   8   0   -0.17    0.18
   7  -8   0    0.01    0.15
   8   7   0    0.20    0.19
   6  -8   0    2.64    0.23
  -6   8   0    3.73    0.29
   8   6   0    3.49    0.28
  -8  -6   0    4.06    0.34
  -8  -5   0   -0.03    0.17
   8   5   0    0.09    0.16
  -5   8   0   -0.13    0.16
   5  -8   0   -0.01    0.14
  -4   8   0   53.80    1.51
   4  -8   0   56.44    1.50
   8   4   0   53.13    1.51
  -8  -4   0   56.74    1.55
  -3   8   0    0.00    0.15
   3  -8   0   -0.09    0.12
   8   3   0   -0.21    0.13
  -8  -3   0   -0.02    0.15
   2  -8   0   33.96    0.97
  -8  -2   0   33.38    0.99
  -2   8   0   33.24    0.98
   8   2   0   34.68    0.98
  -8  -1   0    0.05    0.13
   8   1   0    0.10    0.12
  -1   8   0   -0.13    0.13
   1  -8   0   -0.07    0.12
   0  -8   0   95.33    2.51
  -8   0   0   96.56    2.50
   8   0   0   95.79    2.49
   0   8   0   96.16    2.51
   8  -1   0    0.00    0.12
  -1  -8   0   -0.05    0.15
  -8   1   0    0.02    0.13
   1   8   0    0.32    0.16
  -2  -8   0  880.31   22.16
   8  -2   0  869.92   21.83
   2   8   0  876.80   21.97
  -8   2   0  843.13   21.88
  -8   3   0   -0.28    0.14
   8  -3   0   -0.19    0.13
  -3  -8   0   -0.41    0.17
   3   8   0   -0.12    0.16
   8  -4   0  665.80   17.15
  -8   4   0  681.17   17.26
   4   8   0  686.30   17.39
  -4  -8   0  682.66   17.20
  -8   5   0   -0.24    0.17
   8  -5   0   -0.17    0.14
  -5  -8   0    0.13    0.21
   5   8   0    0.06    0.15
  -8   6   0    3.75    0.28
   8  -6   0    3.58    0.26
   6   8   0    3.41    0.29
  -6  -8   0    3.47    0.34
  -8   7   0    0.01    0.18
   8  -7   0   -0.06    0.16
   7   8   0    0.06    0.18
  -7  -8   0    0.37    0.24
  -8   8   0    6.43    0.44
   8   8   0    7.17    0.44
   8  -8   0    7.53    0.41
  -8  -8   0    6.92    0.51
  -8   9   0    0.05    0.21
   8  -9   0    0.12    0.18
  -9  -8   0    0.04    0.25
   9   8   0    0.20    0.21
  -7   9   0    1.34    0.25
   7  -9   0    1.73    0.23
   9   7   0    1.48    0.25
  -9  -7   0    1.51    0.29
   9   6   0    0.13    0.19
   6  -9   0    0.09    0.16
  -6   9   0    0.21    0.20
  -9  -6   0    0.19    0.22
   9   5   0  209.12    5.38
  -9  -5   0  206.10    5.41
  -5   9   0  217.09    5.38
   5  -9   0  212.35    5.36
   9   4   0    0.14    0.16
  -4   9   0   -0.19    0.18
  -9  -4   0   -0.01    0.19
   4  -9   0   -0.07    0.15
  -9  -3   0   86.60    2.40
  -3   9   0   87.74    2.38
   9   3   0   92.41    2.38
   3  -9   0   93.43    2.38
   2  -9   0    0.25    0.15
  -2   9   0   -0.19    0.15
   9   2   0   -0.08    0.15
  -9  -2   0   -0.10    0.15
  -9  -1   0    1.97    0.22
  -1   9   0    2.75    0.25
   9   1   0    3.11    0.28
   1  -9   0    3.13    0.29
   0  -9   0   -0.07    0.15
   0   9   0   -0.01    0.16
   9   0   0   -0.01    0.13
  -9   0   0   -0.01    0.15
  -1  -9   0   14.19    0.54
  -9   1   0   13.83    0.51
   1   9   0   12.89    0.52
   9  -1   0   13.57    0.49
  -9   2   0    0.32    0.17
  -2  -9   0   -0.03    0.18
   2   9   0    0.07    0.17
   9  -2   0   -0.01    0.13
  -3  -9   0  471.71   12.09
  -9   3   0  473.21   12.19
   9  -3   0  501.47   12.27
   3   9   0  487.01   12.39
  -4  -9   0    0.69    0.21
   9  -4   0   -0.14    0.15
  -9   4   0    0.09    0.17
   4   9   0    0.02    0.17
   5   9   0   60.06    1.68
  -5  -9   0   60.11    1.71
   9  -5   0   60.90    1.64
  -9   5   0   59.36    1.65
  -9   6   0   -0.14    0.18
   6   9   0    0.17    0.17
   9  -6   0   -0.07    0.15
  -6  -9   0   -0.17    0.21
   7   9   0   33.67    1.07
  -7  -9   0   32.54    1.12
   9  -7   0   34.60    1.02
  -9   7   0   35.69    1.06
  -9   8   0    0.29    0.22
   8   9   0    0.22    0.21
  -8  -9   0   -0.40    0.25
   9  -8   0   -0.12    0.18
  -9  -9   0    1.97    0.36
   9  -9   0    2.31    0.27
  -9   9   0    2.23    0.31
   9   9   0    1.79    0.27
  10   9   0    0.11    0.22
 -10  -9   0   -0.15    0.30
   9 -10   0   -0.30    0.21
  -9  10   0   -0.05    0.24
 -10  -8   0   50.94    1.61
  -8  10   0   52.79    1.54
  10   8   0   54.96    1.56
   8 -10   0   53.04    1.51
  -7  10   0    0.36    0.22
   7 -10   0    0.02    0.19
  10   7   0    0.20    0.21
 -10  -7   0   -0.13    0.25
 -10  -6   0  272.13    7.11
  10   6   0  279.75    7.08
  -6  10   0  281.51    7.07
   6 -10   0  282.17    7.05
  -5  10   0   -0.21    0.20
 -10  -5   0    0.25    0.22
  10   5   0    0.18    0.20
   5 -10   0    0.19    0.19
 -10  -4   0  715.46   18.35
  10   4   0  719.77   18.11
  -4  10   0  734.07   17.98
   4 -10   0  718.87   18.43
  10   3   0    0.17    0.19
 -10  -3   0   -0.15    0.18
  -3  10   0   -0.01    0.19
   3 -10   0    0.04    0.18
   2 -10   0   28.35    0.89
  -2  10   0   29.04    0.90
 -10  -2   0   27.13    0.90
  10   2   0   28.68    0.89
  -1  10   0   -0.11    0.18
  10   1   0   -0.11    0.16
   1 -10   0   -0.16    0.17
 -10  -1   0    0.00    0.19
 -10   0   0   25.61    0.83
   0  10   0   24.09    0.82
   0 -10   0   26.86    0.84
  10   0   0   25.62    0.81
  -1 -10   0    0.05    0.19
   1  10   0    0.01    0.18
  10  -1   0   -0.09    0.15
 -10   1   0   -0.07    0.16
  10  -2   0   21.98    0.70
   2  10   0   21.43    0.74
  -2 -10   0   21.23    0.76
 -10   2   0   20.64    0.72
  -3 -10   0   -0.10    0.20
  10  -3   0   -0.17    0.14
   3  10   0   -0.20    0.17
 -10   3   0   -0.10    0.17
   4  10   0   85.28    2.30
 -10   4   0   84.93    2.28
  10  -4   0   85.43    2.26
  -4 -10   0   84.73    2.33
   5  10   0    0.17    0.20
  10  -5   0   -0.07    0.16
  -5 -10   0   -0.02    0.23
 -10   5   0    0.17    0.20
 -10   6   0    1.38    0.24
  -6 -10   0    1.94    0.31
   6  10   0    1.82    0.26
  10  -6   0    1.46    0.21
   7  10   0   -0.05    0.20
  -7 -10   0    0.19    0.27
 -10   7   0    0.07    0.22
  10  -7   0   -0.07    0.18
   8  10   0   29.16    0.98
  -8 -10   0   27.70    1.04
 -10   8   0   28.22    0.96
  10  -8   0   29.21    0.93
 -10   9   0   -0.14    0.23
  10  -9   0   -0.04    0.20
   9  10   0    0.18    0.23
  -9 -10   0    0.15    0.32
  10 -10   0   16.26    0.67
  10  10   0   14.28    0.70
 -10  10   0   15.16    0.71
 -10 -10   0   15.05    0.81
 -11 -10   0    0.12    0.35
  11  10   0    0.14    0.29
 -10  11   0    0.04    0.28
  10 -11   0   -0.03    0.25
 -11  -9   0    2.15    0.40
   9 -11   0    2.37    0.31
  -9  11   0    2.04    0.33
  11   9   0    2.26    0.34
  11   8   0    0.21    0.25
  -8  11   0    0.40    0.26
   8 -11   0    0.23    0.21
 -11  -8   0    0.18    0.29
  11   7   0   35.56    1.14
 -11  -7   0   34.51    1.20
  -7  11   0   36.48    1.15
   7 -11   0   36.97    1.12
  -6  11   0   -0.10    0.23
 -11  -6   0    0.68    0.28
   6 -11   0    0.01    0.18
  11   6   0   -0.16    0.21
  -5  11   0  496.20   12.37
   5 -11   0  499.30   12.36
 -11  -5   0  478.56   12.40
  11   5   0  500.54   12.38
  11   4   0    0.21    0.22
 -11  -4   0    0.28    0.25
  -4  11   0    0.32    0.23
   4 -11   0    0.13    0.20
  11   3   0  159.80    4.14
   3 -11   0  161.24    4.14
 -11  -3   0  157.10    4.16
  -3  11   0  162.56    4.15
  11   2   0   -0.04    0.19
 -11  -2   0    0.00    0.21
   2 -11   0    0.06    0.20
  -2  11   0   -0.21    0.20
   1 -11   0   27.30    0.90
  -1  11   0   27.31    0.91
 -11  -1   0   27.85    0.91
  11   1   0   27.78    0.89
   0  11   0    0.09    0.20
   0 -11   0   -0.06    0.21
  11   0   0    0.06    0.18
 -11   0   0    0.12    0.19
 -11   1   0   46.41    1.35
  11  -1   0   46.84    1.33
  -1 -11   0   47.83    1.38
   1  11   0   45.13    1.36
  11  -2   0   -0.04    0.17
 -11   2   0    0.18    0.19
   2  11   0   -0.09    0.21
  -2 -11   0   -0.40    0.21
  -3 -11   0   -0.10    0.23
   3  11   0    0.19    0.20
  11  -3   0    0.32    0.18
 -11   3   0    0.24    0.21
   4  11   0   -0.21    0.19
 -11   4   0    0.01    0.21
  -4 -11   0   -0.06    0.22
  11  -4   0   -0.09    0.18
 -11   5   0    9.65    0.51
  -5 -11   0   10.16    0.60
  11  -5   0   10.27    0.48
   5  11   0   10.58    0.55
 -11   6   0   -0.18    0.21
  -6 -11   0   -0.55    0.24
  11  -6   0    0.02    0.18
   6  11   0   -0.29    0.21
  -7 -11   0    0.49    0.32
 -11   7   0    0.03    0.23
  11  -7   0    0.20    0.20
   7  11   0    0.12    0.24
 -11   8   0    0.29    0.25
  -8 -11   0   -0.01    0.30
   8  11   0    0.04    0.24
  11  -8   0   -0.06    0.20
   9  11   0   12.19    0.64
 -11   9   0   11.42    0.64
  11  -9   0   11.59    0.57
  -9 -11   0   11.84    0.73
 -10 -11   0    0.31    0.35
  10  11   0    0.23    0.30
  11 -10   0   -0.09    0.24
 -11  10   0    0.04    0.30
  11 -11   0   76.61    2.16
 -11 -11   0   76.33    2.29
  11  11   0   77.44    2.21
 -11  11   0   76.28    2.20
 -12 -11   0    0.14    0.42
  12  11   0    0.00    0.31
  11 -12   0   -0.12    0.29
 -11  12   0    0.30    0.34
  10 -12   0   37.20    1.22
 -12 -10   0   37.42    1.35
  12  10   0   37.14    1.26
 -10  12   0   38.41    1.29
  12   9   0    0.11    0.26
 -12  -9   0    0.25    0.36
  -9  12   0   -0.38    0.29
   9 -12   0    0.27    0.26
  12   8   0    0.29    0.25
  -8  12   0    0.28    0.28
 -12  -8   0   -0.15    0.33
   8 -12   0    0.01    0.23
   7 -12   0    0.06    0.22
 -12  -7   0    0.24    0.28
  -7  12   0   -0.13    0.27
  12   7   0    0.13    0.24
 -12  -6   0  103.81    2.88
  12   6   0  104.79    2.83
  -6  12   0  105.44    2.84
   6 -12   0  105.08    2.81
  12   5   0    0.17    0.23
  -5  12   0    0.01    0.25
   5 -12   0   -0.15    0.20
 -12  -5   0   -0.19    0.27
  -4  12   0  326.75    8.37
  12   4   0  341.64    8.37
   4 -12   0  330.54    8.36
 -12  -4   0  324.00    8.39
  12   3   0   -0.27    0.20
   3 -12   0   -0.05    0.21
 -12  -3   0   -0.11    0.23
  -3  12   0   -0.16    0.22
   2 -12   0   65.21    1.84
  12   2   0   66.89    1.83
  -2  12   0   64.05    1.85
 -12  -2   0   66.52    1.87
  -1  12   0    0.13    0.23
   1 -12   0    0.05    0.21
  12   1   0    0.09    0.21
 -12  -1   0    0.03    0.23
   0 -12   0    0.24    0.22
 -12   0   0    0.08    0.21
   0  12   0    0.15    0.23
  12   0   0    0.11    0.19
  12  -1   0    0.13    0.19
  -1 -12   0    0.23    0.24
   1  12   0    0.20    0.25
 -12   1   0    0.11    0.22
  -2 -12   0    0.80    0.26
   2  12   0    0.94    0.25
  12  -2   0    0.84    0.22
 -12   2   0    0.74    0.23
  -3 -12   0    0.17    0.26
  12  -3   0   -0.03    0.19
 -12   3   0   -0.06    0.23
   3  12   0   -0.17    0.23
   4  12   0    0.14    0.23
  12  -4   0    0.16    0.20
  -4 -12   0    0.05    0.27
 -12   4   0   -0.03    0.24
 -12   5   0    0.06    0.25
   5  12   0   -0.08    0.23
  12  -5   0    0.13    0.21
  -5 -12   0   -0.07    0.27
  -6 -12   0    0.26    0.32
   6  12   0    0.28    0.25
  12  -6   0    0.29    0.22
 -12   6   0    0.39    0.23
   7  12   0   -0.06    0.25
 -12   7   0    0.45    0.28
  12  -7   0    0.05    0.22
  -7 -12   0   -0.05    0.32
   8  12   0   64.40    1.87
  -8 -12   0   60.97    1.93
 -12   8   0   64.98    1.85
  12  -8   0   64.14    1.81
   9  12   0    0.10    0.29
  12  -9   0   -0.20    0.25
  -9 -12   0    0.61    0.38
 -12   9   0    0.03    0.31
  10  12   0   67.42    1.94
 -12  10   0   64.38    1.93
 -10 -12   0   65.46    2.03
  12 -10   0   63.34    1.87
 -12  11   0    0.08    0.33
  12 -11   0   -0.04    0.29
 -11 -12   0    0.07    0.42
  11  12   0    0.05    0.31
 -12  12   0  118.72    3.30
 -12 -12   0  124.04    3.39
  12  12   0  116.55    3.29
 -13 -12   0    0.53    0.47
 -12  13   0   -0.25    0.38
  13  12   0    0.19    0.35
  13  11   0   96.46    2.70
 -11  13   0   94.03    2.70
 -13 -11   0   95.34    2.79
 -13 -10   0    0.16    0.39
  10 -13   0    0.48    0.30
  13  10   0    0.11    0.31
 -10  13   0   -0.26    0.32
  13   9   0    1.33    0.33
   9 -13   0    1.08    0.30
  -9  13   0    1.25    0.36
 -13  -9   0    1.49    0.43
  -8  13   0    0.03    0.31
 -13  -8   0   -0.19    0.35
  13   8   0    0.31    0.27
   8 -13   0    0.04    0.27
 -13  -7   0    6.78    0.54
  13   7   0    5.09    0.42
   7 -13   0    6.08    0.49
  -7  13   0    5.41    0.45
   6 -13   0    0.09    0.24
 -13  -6   0    0.02    0.29
  13   6   0   -0.31    0.25
  -6  13   0   -0.10    0.27
   5 -13   0   12.09    0.59
  -5  13   0   12.76    0.66
 -13  -5   0   11.55    0.69
  13   5   0   11.87    0.63
  13   4   0    0.18    0.23
   4 -13   0   -0.13    0.22
  -4  13   0   -0.16    0.26
 -13  -4   0   -0.02    0.26
  13   3   0   22.69    0.83
   3 -13   0   22.21    0.82
  -3  13   0   21.71    0.84
 -13  -3   0   22.01    0.87
  -2  13   0   -0.15    0.26
   2 -13   0   -0.04    0.22
 -13  -2   0    0.07    0.25
  13   2   0    0.08    0.23
   1 -13   0    1.78    0.30
  13   1   0    1.27    0.26
  -1  13   0    1.17    0.30
 -13  -1   0    1.38    0.30
  13   0   0    0.06    0.21
   0 -13   0   -0.03    0.23
 -13   0   0   -0.07    0.24
   0  13   0   -0.12    0.25
  -1 -13   0    1.25    0.28
 -13   1   0    1.35    0.30
   1  13   0    1.23    0.27
  13  -1   0    1.31    0.25
   2  13   0    0.06    0.24
  -2 -13   0   -0.13    0.27
 -13   2   0    0.05    0.24
  13  -2   0    0.40    0.22
  -3 -13   0    0.91    0.31
 -13   3   0    1.01    0.29
   3  13   0    0.51    0.26
  13  -3   0    0.64    0.23
 -13   4   0   -0.06    0.25
  -4 -13   0   -0.06    0.28
   4  13   0   -0.01    0.25
  13  -4   0   -0.11    0.21
  -5 -13   0    1.75    0.36
   5  13   0    2.50    0.35
  13  -5   0    1.96    0.27
 -13   5   0    2.61    0.34
  13  -6   0   -0.29    0.22
 -13   6   0    0.16    0.28
   6  13   0   -0.04    0.28
  -6 -13   0    0.26    0.33
  13  -7   0   50.99    1.53
 -13   7   0   51.83    1.58
  -7 -13   0   51.93    1.66
   7  13   0   52.64    1.60
  -8 -13   0    0.14    0.38
 -13   8   0   -0.46    0.30
   8  13   0    0.32    0.30
  13  -8   0   -0.39    0.25
   9  13   0   23.89    0.96
 -13   9   0   23.80    0.96
  -9 -13   0   23.40    1.08
  13  -9   0   22.48    0.89
 -10 -13   0   -0.36    0.40
  10  13   0   -0.09    0.33
 -13  10   0   -0.34    0.34
 -13  11   0    0.51    0.40
 -11 -13   0    1.07    0.48
  11  13   0    1.17    0.37
 -13  12   0   -0.08    0.38
  12  13   0   -0.14    0.35
 -12 -13   0    0.17    0.46
  13  13   0   81.43    2.45
 -13  13   0   83.64    2.46
 -13 -13   0   84.91    2.56
  14  13   0    0.84    0.41
 -13  14   0    0.22    0.44
 -14 -13   0    0.65    0.54
  14  12   0  216.41    5.75
 -12  14   0  216.23    5.75
 -14 -12   0  222.47    5.86
 -11  14   0    0.22    0.39
 -14 -11   0    0.41    0.47
  14  11   0    0.63    0.38
  14  10   0   52.25    1.66
 -10  14   0   50.88    1.68
 -14 -10   0   53.06    1.76
  -9  14   0    0.19    0.35
   9 -14   0    0.07    0.30
  14   9   0   -0.28    0.30
 -14  -9   0    0.05    0.39
   8 -14   0   12.25    0.69
  14   8   0   13.09    0.71
 -14  -8   0   12.43    0.83
  -8  14   0   12.72    0.77
  14   7   0    0.16    0.29
 -14  -7   0    0.20    0.37
   7 -14   0   -0.07    0.27
  -7  14   0    0.29    0.33
  14   6   0    0.50    0.29
 -14  -6   0    0.54    0.35
  -6  14   0    0.37    0.33
   6 -14   0    0.45    0.28
   5 -14   0    0.20    0.26
 -14  -5   0    0.07    0.30
  -5  14   0    0.04    0.31
  14   5   0   -0.22    0.27
  -4  14   0    1.26    0.33
   4 -14   0    1.26    0.28
  14   4   0    1.75    0.30
 -14  -4   0    1.73    0.36
  -3  14   0   -0.13    0.27
 -14  -3   0   -0.20    0.29
   3 -14   0   -0.01    0.24
  14   3   0    0.23    0.24
  14   2   0    2.19    0.31
 -14  -2   0    2.10    0.35
   2 -14   0    2.48    0.34
  -2  14   0    1.92    0.32
   1 -14   0   -0.08    0.25
  -1  14   0   -0.17    0.28
 -14  -1   0   -0.11    0.27
  14   1   0    0.40    0.25
   0  14   0   11.54    0.65
   0 -14   0   11.29    0.64
 -14   0   0   12.26    0.66
  14   0   0   11.38    0.58
  -1 -14   0    0.01    0.29
  14  -1   0    0.23    0.24
 -14   1   0   -0.11    0.26
   1  14   0    0.07    0.27
   2  14   0   63.97    1.88
  14  -2   0   63.57    1.82
  -2 -14   0   64.66    1.90
 -14   2   0   64.23    1.86
  -3 -14   0   -0.13    0.31
 -14   3   0   -0.15    0.27
   3  14   0   -0.25    0.28
  14  -3   0   -0.05    0.23
  -4 -14   0   74.65    2.14
   4  14   0   71.57    2.09
  14  -4   0   72.63    2.04
 -14   4   0   71.30    2.07
  -5 -14   0   -0.11    0.35
 -14   5   0    0.14    0.30
  14  -5   0   -0.09    0.24
   5  14   0    0.12    0.31
   6  14   0  240.11    6.09
  -6 -14   0  233.63    6.14
  14  -6   0  234.04    6.02
 -14   6   0  230.81    6.05
  -7 -14   0    0.59    0.38
   7  14   0    0.47    0.32
  14  -7   0   -0.08    0.27
 -14   7   0    0.07    0.32
 -14   8   0   34.91    1.24
   8  14   0   37.22    1.27
  -8 -14   0   36.08    1.35
  14  -8   0   35.11    1.23
  -9 -14   0   -0.11    0.41
   9  14   0    0.00    0.33
 -14   9   0   -0.51    0.34
  10  14   0    6.91    0.54
 -10 -14   0    6.51    0.62
 -14  10   0    6.20    0.55
  11  14   0    0.02    0.36
 -11 -14   0   -0.37    0.44
 -14  11   0    0.15    0.40
  12  14   0    1.63    0.44
 -14  12   0    1.05    0.45
 -12 -14   0    1.88    0.56
 -13 -14   0    0.36    0.52
  13  14   0    0.01    0.40
 -14  13   0    0.19    0.45
  14  14   0   93.28    2.91
 -14 -14   0   98.05    2.94
 -14  14   0   95.87    2.83
 -14  15   0   -0.23    0.49
 -15 -14   0    0.13    0.56
 -15 -13   0   92.83    2.82
 -13  15   0   87.76    2.68
 -12  15   0   -0.29    0.43
 -15 -12   0   -0.13    0.54
 -11  15   0   71.42    2.24
  15  11   0   73.80    2.22
 -15 -11   0   75.15    2.34
  15  10   0    0.14    0.35
 -10  15   0    0.36    0.40
 -15 -10   0    0.14    0.44
  -9  15   0    0.34    0.39
  15   9   0    0.10    0.34
 -15  -9   0    0.24    0.43
   8 -15   0   -0.13    0.33
  -8  15   0   -0.21    0.36
 -15  -8   0    0.35    0.43
  15   8   0   -0.26    0.31
  -7  15   0    1.65    0.38
   7 -15   0    1.97    0.38
 -15  -7   0    1.51    0.41
  15   7   0    2.00    0.37
  -6  15   0   -0.23    0.35
 -15  -6   0   -0.25    0.34
   6 -15   0   -0.04    0.28
  15   6   0   -0.09    0.28
  -5  15   0   31.87    1.17
  15   5   0   31.46    1.12
 -15  -5   0   31.14    1.19
   5 -15   0   30.12    1.08
 -15  -4   0    0.02    0.32
  15   4   0   -0.10    0.28
  -4  15   0   -0.02    0.33
   4 -15   0    0.07    0.27
  15   3   0    8.23    0.59
 -15  -3   0    9.89    0.68
  -3  15   0    8.66    0.65
   3 -15   0    8.54    0.59
  -2  15   0   -0.21    0.28
 -15  -2   0    0.25    0.32
  15   2   0    0.15    0.27
   2 -15   0    0.14    0.29
   1 -15   0   30.59    1.09
  15   1   0   30.15    1.06
  -1  15   0   30.63    1.11
 -15  -1   0   30.67    1.11
   0 -15   0   -0.15    0.28
  15   0   0    0.07    0.27
   0  15   0   -0.03    0.29
 -15   0   0    0.04    0.31
 -15   1   0   38.68    1.28
   1  15   0   40.01    1.29
  -1 -15   0   36.45    1.29
  15  -1   0   37.33    1.22
  15  -2   0   -0.02    0.25
  -2 -15   0   -0.35    0.31
 -15   2   0   -0.23    0.29
   2  15   0    0.06    0.31
 -15   3   0   43.77    1.41
   3  15   0   43.88    1.42
  -3 -15   0   42.59    1.46
  15  -3   0   43.63    1.35
  15  -4   0   -0.30    0.25
   4  15   0    0.00    0.31
  -4 -15   0   -0.02    0.36
 -15   4   0    0.16    0.31
   5  15   0  124.47    3.41
  -5 -15   0  126.59    3.47
  15  -5   0  122.06    3.34
 -15   5   0  126.26    3.39
  -6 -15   0    0.21    0.40
   6  15   0    0.35    0.36
 -15   6   0    0.36    0.34
   7  15   0  154.23    4.14
  -7 -15   0  154.40    4.21
 -15   7   0  152.91    4.11
 -15   8   0    0.07    0.37
  -8 -15   0    0.27    0.44
   8  15   0    0.02    0.36
  -9 -15   0    0.43    0.46
   9  15   0    0.50    0.39
 -15   9   0    0.03    0.37
  10  15   0   -0.02    0.37
 -15  10   0   -0.37    0.40
 -10 -15   0    0.24    0.48
  11  15   0   58.17    1.91
 -11 -15   0   61.62    2.05
 -15  11   0   60.66    1.93
 -12 -15   0    1.07    0.53
 -15  12   0   -0.94    0.43
  12  15   0    0.02    0.40
 -13 -15   0    0.53    0.52
 -15  13   0   -0.16    0.46
  13  15   0    0.59    0.45
 -15  14   0   -0.13    0.49
 -14 -15   0    0.44    0.56
 -13  16   0   -0.45    0.44
 -16 -13   0    0.39    0.59
 -16 -12   0   16.28    1.18
 -12  16   0   15.75    1.01
 -11  16   0   -0.71    0.43
 -16 -11   0   -0.51    0.49
 -16 -10   0   21.87    1.17
 -10  16   0   19.60    1.07
 -16  -9   0   -0.41    0.44
  -9  16   0   -0.57    0.39
  -8  16   0   14.18    0.89
  16   8   0   13.95    0.81
 -16  -8   0   14.88    0.97
  -7  16   0   -0.12    0.36
 -16  -7   0   -0.55    0.40
  16   7   0    0.08    0.33
  -6  16   0    1.90    0.42
   6 -16   0    2.24    0.40
 -16  -6   0    2.59    0.48
  16   6   0    2.40    0.39
 -16  -5   0   -0.06    0.37
   5 -16   0   -0.49    0.28
  -5  16   0    0.03    0.36
  16   5   0    0.25    0.33
   4 -16   0    1.44    0.35
 -16  -4   0    1.24    0.39
  16   4   0    2.12    0.38
  -4  16   0    1.45    0.41
 -16  -3   0   -0.18    0.35
  16   3   0    0.50    0.30
   3 -16   0   -0.53    0.29
  -3  16   0   -0.17    0.35
   2 -16   0   61.27    1.86
 -16  -2   0   61.26    1.88
  -2  16   0   60.85    1.88
  16   2   0   62.61    1.83
  -1  16   0    0.59    0.36
 -16  -1   0    0.14    0.34
   1 -16   0   -0.29    0.32
  16   1   0    0.14    0.29
 -16   0   0  115.19    3.14
   0  16   0  113.68    3.15
  16   0   0  111.72    3.09
   0 -16   0  115.28    3.15
  -1 -16   0    0.11    0.34
   1  16   0   -0.16    0.33
  16  -1   0   -0.06    0.28
 -16   1   0   -0.31    0.33
 -16   2   0   17.64    0.86
  -2 -16   0   17.27    0.91
   2  16   0   16.78    0.86
  16  -2   0   16.24    0.77
  -3 -16   0   -0.47    0.35
   3  16   0    0.55    0.37
  16  -3   0   -0.05    0.31
 -16   3   0   -0.02    0.35
 -16   4   0   23.24    0.99
   4  16   0   21.98    0.97
  -4 -16   0   21.87    1.04
  -5 -16   0   -0.41    0.42
 -16   5   0    0.44    0.36
   5  16   0   -0.02    0.36
   6  16   0  264.88    6.86
 -16   6   0  267.61    6.84
  -6 -16   0  260.15    6.92
   7  16   0    0.16    0.39
  -7 -16   0    0.44    0.46
 -16   7   0    0.40    0.39
   8  16   0   70.21    2.12
  -8 -16   0   69.12    2.22
 -16   8   0   69.36    2.12
  -9 -16   0   -0.01    0.45
 -16   9   0   -0.10    0.40
   9  16   0   -0.55    0.38
  10  16   0   21.46    1.07
 -10 -16   0   23.98    1.22
 -16  10   0   22.26    1.10
  11  16   0   -0.06    0.42
 -11 -16   0    0.10    0.51
 -16  11   0    0.07    0.45
 -12 -16   0    2.77    0.61
 -16  12   0    2.09    0.52
  12  16   0    3.51    0.54
 -16  13   0   -0.19    0.48
 -13 -16   0    0.18    0.55
 -12  17   0    0.07    0.47
 -17 -12   0    0.54    0.58
 -11  17   0    0.91    0.49
 -17 -11   0    1.89    0.57
 -10  17   0   -0.30    0.46
 -17 -10   0    0.31    0.54
 -17  -9   0    7.53    0.70
  -9  17   0    6.11    0.62
 -17  -8   0    0.02    0.45
  -8  17   0   -0.65    0.40
  -7  17   0   24.19    1.11
 -17  -7   0   24.39    1.18
 -17  -6   0    0.04    0.42
  -6  17   0   -0.07    0.42
 -17  -5   0    3.54    0.52
  -5  17   0    2.69    0.49
   5 -17   0    2.48    0.41
 -17  -4   0   -0.17    0.39
  -4  17   0   -0.13    0.39
   4 -17   0   -0.11    0.32
  -3  17   0   38.37    1.37
 -17  -3   0   37.77    1.39
   3 -17   0   36.60    1.31
  -2  17   0   -0.06    0.36
 -17  -2   0    0.24    0.39
   2 -17   0    0.45    0.37
 -17  -1   0   74.26    2.22
   1 -17   0   73.69    2.21
  -1  17   0   73.99    2.22
   0 -17   0   -0.10    0.36
   0  17   0    0.15    0.37
 -17   0   0    0.46    0.37
  -1 -17   0    3.96    0.51
 -17   1   0    4.95    0.52
   1  17   0    4.03    0.48
  -2 -17   0   -0.38    0.36
   2  17   0    0.38    0.39
 -17   2   0   -0.08    0.37
   3  17   0   12.40    0.81
  -3 -17   0   13.29    0.87
 -17   3   0   12.53    0.84
   4  17   0   -0.14    0.40
 -17   4   0   -0.51    0.38
  -4 -17   0    0.03    0.42
  -5 -17   0   19.88    1.06
 -17   5   0   20.31    0.98
   5  17   0   20.41    1.00
 -17   6   0    0.21    0.41
   6  17   0   -0.12    0.38
  -6 -17   0   -0.65    0.44
   7  17   0   99.11    2.88
  -7 -17   0   98.35    2.95
 -17   7   0  101.15    2.86
 -17   8   0   -0.68    0.43
  -8 -17   0   -0.09    0.50
   8  17   0    0.47    0.44
  -9 -17   0    0.11    0.53
 -17   9   0   -0.12    0.43
   9  17   0    0.34    0.45
 -10 -17   0    0.28    0.52
  10  17   0    0.08    0.43
 -17  10   0   -0.02    0.44
 -17  11   0    7.78    0.71
  11  17   0    7.56    0.69
 -11 -17   0    9.06    0.84
 -17  12   0    0.22    0.50
  12  17   0    0.31    0.46
 -12 -17   0    0.86    0.60
 -18 -10   0    6.90    0.74
 -10  18   0    7.63    0.71
 -18  -9   0   -0.21    0.52
  -9  18   0    0.11    0.45
 -18  -8   0   54.23    1.93
  -8  18   0   55.45    1.86
  -7  18   0   -0.17    0.43
 -18  -7   0    0.54    0.51
  -6  18   0   23.31    1.16
 -18  -6   0   24.70    1.19
 -18  -5   0   -0.25    0.44
  -5  18   0   -0.69    0.42
  -4  18   0   27.18    1.19
 -18  -4   0   27.37    1.21
 -18  -3   0    0.40    0.43
   3 -18   0    0.48    0.38
  -3  18   0    0.10    0.45
   2 -18   0  185.35    5.08
 -18  -2   0  191.98    5.10
  -2  18   0  194.86    5.10
  -1  18   0    0.55    0.44
   1 -18   0    0.06    0.40
 -18  -1   0    0.67    0.43
   0 -18   0   93.36    2.73
   0  18   0   96.03    2.73
 -18   0   0   91.21    2.71
   1  18   0   -0.06    0.41
 -18   1   0   -0.54    0.40
  -1 -18   0   -0.58    0.38
 -18   2   0   15.76    0.93
   2  18   0   14.46    0.93
  -2 -18   0   14.83    0.92
 -18   3   0   -0.24    0.42
  -3 -18   0   -0.20    0.44
   3  18   0   -0.13    0.41
   4  18   0   19.16    1.02
  -4 -18   0   19.73    1.06
 -18   4   0   18.64    1.02
 -18   5   0   -0.12    0.42
  -5 -18   0   -0.30    0.47
   5  18   0    0.30    0.44
   6  18   0   23.23    1.11
 -18   6   0   23.51    1.12
  -6 -18   0   23.68    1.23
 -18   7   0   -0.26    0.44
  -7 -18   0    0.41    0.52
   7  18   0   -0.30    0.43
   8  18   0   13.48    0.93
 -18   8   0   12.07    0.96
  -8 -18   0   11.26    0.86
   9  18   0    0.31    0.47
 -18   9   0   -0.30    0.46
  -9 -18   0    0.34    0.54
  10  18   0    0.59    0.49
 -18  10   0    0.15    0.49
 -10 -18   0    0.67    0.58
  -8  19   0   -0.38    0.47
 -19  -8   0    0.52    0.56
  -7  19   0   33.19    1.43
 -19  -7   0   34.88    1.52
  -6  19   0   -0.25    0.47
 -19  -6   0   -0.04    0.51
 -19  -5   0    2.17    0.52
  -5  19   0    2.37    0.57
 -19  -4   0   -0.16    0.47
  -4  19   0   -0.44    0.48
  -3  19   0   60.24    1.99
 -19  -3   0   60.22    1.99
 -19  -2   0    1.39    0.47
  -2  19   0    0.48    0.47
 -19  -1   0  156.19    4.26
  -1  19   0  154.63    4.27
 -19   0   0    0.08    0.44
   0  19   0    0.12    0.45
   0 -19   0   -0.33    0.42
   1  19   0    2.19    0.53
  -1 -19   0    1.75    0.52
 -19   1   0    1.67    0.51
  -2 -19   0   -0.28    0.46
 -19   2   0   -0.25    0.45
   2  19   0   -0.70    0.44
 -19   3   0   51.30    1.73
   3  19   0   49.21    1.74
  -3 -19   0   48.18    1.76
  -4 -19   0    0.63    0.51
 -19   4   0   -0.52    0.45
   4  19   0   -0.09    0.46
   5  19   0    4.62    0.60
 -19   5   0    3.47    0.56
  -5 -19   0    4.02    0.61
   6  19   0    0.10    0.47
  -6 -19   0    0.70    0.54
 -19   6   0   -0.26    0.45
   7  19   0   -0.09    0.45
 -19   7   0    0.12    0.46
  -7 -19   0   -0.11    0.52
 -19   8   0   -1.06    0.48
  -8 -19   0    0.45    0.55
   8  19   0    0.49    0.46
 -20  -5   0    0.21    0.54
  -5  20   0   -0.32    0.51
 -20  -4   0    0.39    0.51
  -4  20   0    0.16    0.52
  -3  20   0    0.18    0.50
 -20  -3   0   -0.27    0.49
 -20  -2   0   70.87    2.27
  -2  20   0   71.05    2.29
  -1  20   0    0.58    0.46
 -20  -1   0    0.69    0.50
   0  20   0   57.48    1.94
 -20   0   0   56.66    1.94
   1  20   0   -0.52    0.47
 -20   1   0   -0.60    0.45
   2  20   0    0.29    0.47
 -20   2   0    0.00    0.49
   3  20   0   -0.23    0.48
 -20   3   0    0.31    0.51
   4  20   0    1.09    0.52
 -20   4   0    0.54    0.50
 -20   5   0   -0.28    0.49
  -5 -20   0    0.37    0.57
   5  20   0    0.10    0.50
   0   0  -1  165.79    4.24
   0   0  -1  170.18    4.25
   0   0   1  172.17    4.24
   0   0   1  171.26    4.24
   0   1  -1  840.62   21.32
   0  -1  -1  847.81   21.41
   1   0  -1  804.00   21.31
   0   1  -1  818.95   21.06
   1   0  -1  855.54   21.94
   0  -1  -1  824.21   21.26
   0   1   1  830.14   21.22
   0  -1   1  769.63   21.03
   0  -1   1  824.20   21.13
  -1   0   1  804.48   21.56
  -1   1  -1  158.22    3.84
  -1   1  -1  158.99    3.84
   1   1  -1  155.01    3.92
  -1  -1  -1  155.33    3.88
   1   1  -1  153.62    3.92
   1  -1  -1  140.77    3.85
   1  -1  -1  146.46    3.86
  -1  -1  -1  151.95    3.87
  -1   1   1  159.76    3.91
  -1  -1   1  142.29    3.83
  -1   1   1  161.36    3.92
   1   1   1  150.54    3.87
   1  -1   1  157.17    3.83
   1  -1   1  153.04    3.82
   2   1  -1  102.14    2.44
  -2  -1  -1   96.07    2.47
   1  -2  -1   95.17    2.43
  -1   2  -1  100.45    2.42
   2   1  -1   97.15    2.48
  -1   2  -1   95.67    2.94
  -2  -1  -1   96.73    2.45
   1  -2  -1   93.07    2.43
  -2  -1   1   87.68    2.43
  -1   2   1   98.22    2.43
  -2  -1   1   94.05    2.43
   1  -2   1   98.76    2.45
  -1   2   1   98.04    2.43
   2   1   1   96.21    2.45
   0   2  -1    5.42    0.18
  -2   0  -1    5.55    0.17
  -2   0  -1    5.53    0.17
   0   2  -1    5.17    0.18
   2   0  -1    5.41    0.19
   0  -2  -1    5.23    0.18
   2   0  -1    5.51    0.19
   2   0   1    5.48    0.17
  -2   0   1    5.61    0.19
   0  -2   1    5.97    0.18
   0   2   1    5.55    0.18
   2   0   1    5.51    0.17
  -2   1  -1   67.41    1.64
  -1  -2  -1   63.49    1.63
   1   2  -1   65.35    1.64
   2  -1  -1   62.87    1.63
  -2   1  -1   65.42    1.61
  -1  -2  -1   63.25    1.63
   1   2  -1   65.03    1.63
   2  -1   1   66.85    1.65
  -2   1   1   66.12    1.63
  -1  -2   1   62.76    1.64
   2  -1   1   66.50    1.61
   1   2   1   64.03    1.63
  -2   1   1   60.71    1.63
  -1  -2   1   65.76    1.63
   1   2   1   62.84    1.63
   2  -2  -1    2.31    0.13
   2   2  -1    2.04    0.14
  -2   2  -1    2.15    0.11
  -2  -2  -1    2.31    0.14
  -2   2  -1    2.31    0.11
  -2  -2  -1    2.10    0.13
   2   2   1    2.10    0.12
   2  -2   1    2.27    0.10
  -2   2   1    2.23    0.13
  -2   2   1    2.22    0.14
  -2  -2   1    2.42    0.14
   2   2   1    2.25    0.13
  -2  -2   1    2.19    0.15
   2  -2   1    2.37    0.10
  -3  -2  -1   48.46    1.26
  -2   3  -1   47.82    1.25
   2  -3  -1   48.45    1.26
   2  -3  -1   48.21    1.26
   3   2  -1   50.47    1.29
  -2   3  -1   50.18    1.25
   3   2  -1   46.30    1.27
  -3  -2  -1   46.59    1.27
  -3  -2   1   49.94    1.27
   3   2   1   48.30    1.27
   3   2   1   48.05    1.26
  -2   3   1   48.69    1.26
   2  -3   1   48.09    1.24
  -3  -2   1   45.87    1.28
  -2   3   1   50.33    1.26
  -3  -1  -1    9.97    0.32
   1  -3  -1   10.31    0.33
  -3  -1  -1   10.47    0.33
   3   1  -1   10.09    0.34
   3   1  -1   10.28    0.34
   1  -3  -1   10.88    0.34
  -1   3  -1    9.71    0.32
  -1   3  -1   10.30    0.32
  -3  -1   1   10.41    0.35
  -1   3   1    9.99    0.33
   1  -3   1    9.90    0.31
   3   1   1   10.62    0.32
  -3  -1   1   11.25    0.34
  -1   3   1   10.23    0.33
   0  -3  -1    9.64    0.30
  -3   0  -1    8.82    0.28
   0   3  -1    9.71    0.30
  -3   0  -1    9.48    0.28
   3   0  -1    9.78    0.31
   0   3  -1    9.34    0.30
   3   0   1    9.46    0.28
   0   3   1    9.85    0.30
  -3   0   1    9.20    0.30
   0  -3   1    9.53    0.29
   0  -3   1    9.86    0.29
  -1  -3  -1   86.64    2.15
   3  -1  -1   85.59    2.15
   3  -1  -1   83.17    2.15
  -3   1  -1   85.51    2.13
   1   3  -1   81.66    2.15
  -1  -3  -1   81.21    2.15
  -3   1  -1   83.60    2.13
   1   3  -1   87.07    2.15
  -1  -3   1   86.64    2.15
   1   3   1   88.16    2.15
   3  -1   1   85.36    2.13
  -3   1   1   86.54    2.15
  -1  -3   1   86.03    2.15
   1   3   1   83.51    2.14
  -3   1   1   82.42    2.14
   3  -1   1   83.89    2.13
   3  -2  -1   18.17    0.51
   2   3  -1   17.89    0.51
  -2  -3  -1   17.93    0.51
  -3   2  -1   18.19    0.48
   3  -2  -1   17.47    0.50
  -3   2  -1   16.46    0.48
  -2  -3  -1   17.46    0.52
   2   3  -1   18.67    0.53
   3  -2   1   17.75    0.48
   2   3   1   18.43    0.52
   2   3   1   16.68    0.50
   3  -2   1   17.06    0.48
  -2  -3   1   17.53    0.52
  -2  -3   1   18.00    0.51
   3   3  -1   17.75    0.53
   3  -3  -1   17.64    0.52
   3   3  -1   19.49    0.55
  -3  -3  -1   17.06    0.54
  -3   3  -1   19.08    0.50
  -3  -3  -1   18.30    0.53
  -3   3  -1   17.30    0.50
  -3  -3   1   17.65    0.54
   3   3   1   18.40    0.52
   3  -3   1   17.74    0.49
  -3   3   1   16.68    0.52
  -3  -3   1   18.59    0.53
   4   3  -1   34.90    0.99
   3  -4  -1   36.86    0.99
   4   3  -1   38.31    1.02
  -3   4  -1   37.20    0.97
  -4  -3  -1   35.10    1.00
  -4  -3  -1   36.93    0.99
  -3   4  -1   35.62    0.97
  -3   4   1   39.82    0.99
  -4  -3   1   36.72    1.01
  -3   4   1   35.75    0.99
   3  -4   1   37.50    0.97
   4   3   1   35.10    0.98
  -2   4  -1    0.09    0.08
  -4  -2  -1    0.07    0.08
   2  -4  -1    0.05    0.08
   4   2  -1    0.15    0.10
  -4  -2  -1    0.04    0.08
   4   2  -1   -0.08    0.09
  -2   4  -1    0.03    0.07
   2  -4  -1   -0.04    0.08
   2  -4   1    0.04    0.06
   4   2   1    0.11    0.08
  -2   4   1    0.20    0.09
  -4  -2   1    0.02    0.08
  -4  -2   1    0.20    0.10
  -2   4   1   -0.01    0.08
  -4  -1  -1   14.31    0.44
   1  -4  -1   15.43    0.45
   4   1  -1   14.18    0.45
  -1   4  -1   15.55    0.44
   1  -4  -1   15.63    0.45
   4   1  -1   15.48    0.46
  -1   4  -1   14.76    0.43
  -4  -1  -1   13.84    0.43
  -1   4   1   14.11    0.44
  -1   4   1   15.39    0.44
   4   1   1   14.89    0.43
  -4  -1   1   13.15    0.45
  -4  -1   1   14.52    0.45
   1  -4   1   15.33    0.43
   4   0  -1  139.05    3.46
  -4   0  -1  131.87    3.44
   4   0  -1  134.82    3.45
  -4   0  -1  143.17    3.44
   0   4  -1  141.14    3.45
   0   4  -1  131.21    3.44
   0  -4  -1  142.85    3.45
   0  -4  -1  135.28    3.45
  -4   0   1  135.87    3.45
   4   0   1  136.56    3.48
   0  -4   1  132.90    3.44
   0   4   1  142.61    3.45
   0   4   1  137.86    3.45
   1   4  -1  126.44    3.12
  -4   1  -1  118.75    3.10
  -1  -4  -1  122.38    3.12
   1   4  -1  114.23    3.11
   4  -1  -1  119.31    3.11
  -1  -4  -1  125.19    3.12
  -4   1  -1  125.06    3.10
   1   4   1  117.74    3.11
   4  -1   1  122.36    3.10
  -4   1   1  133.53    3.12
   1   4   1  130.55    3.13
  -1  -4   1  127.18    3.12
  -4   1   1  124.48    3.12
  -4   2  -1  206.65    5.05
   2   4  -1  196.38    4.97
  -2  -4  -1  199.22    4.97
  -2  -4  -1  199.67    5.07
  -4   2  -1  190.96    4.99
   2   4   1  191.01    4.96
  -2  -4   1  190.99    4.98
  -4   2   1  190.56    5.03
   4  -2   1  204.17    5.07
  -4   2   1  216.31    5.04
   3   4  -1    1.29    0.15
  -3  -4  -1    1.64    0.14
  -3  -4  -1    1.28    0.15
   3   4  -1    1.26    0.13
  -4   3  -1    1.03    0.10
   4  -3  -1    0.99    0.11
  -4   3  -1    1.02    0.10
  -4   3   1    1.34    0.12
  -4   3   1    1.26    0.14
  -3  -4   1    1.54    0.17
   4  -3   1    1.16    0.10
  -4   4  -1    7.01    0.27
   4   4  -1    7.01    0.30
  -4   4  -1    7.21    0.26
  -4  -4  -1    7.44    0.30
  -4  -4  -1    6.62    0.32
   4  -4  -1    6.58    0.28
   4  -4   1    7.33    0.26
   4   4   1    6.70    0.29
  -4  -4   1    6.24    0.32
  -4   4   1    6.71    0.29
  -4   5  -1    9.99    0.35
  -5  -4  -1    9.63    0.40
  -4   5  -1    8.96    0.36
   5   4  -1    9.15    0.38
  -5  -4  -1   10.54    0.38
   5   4   1   10.01    0.37
   4  -5   1   10.01    0.34
  -5  -4   1   10.25    0.41
  -4   5   1   10.19    0.38
   5   3  -1  218.74    5.57
  -3   5  -1  233.94    5.55
   3  -5  -1  209.26    5.56
  -5  -3  -1  236.92    5.58
  -3   5  -1  219.95    5.63
  -5  -3  -1  222.34    5.58
   3  -5   1  217.10    5.54
  -5  -3   1  220.55    5.59
   5   3   1  221.25    5.56
  -3   5   1  219.49    5.56
  -2   5  -1   41.63    1.14
  -5  -2  -1   46.18    1.15
  -5  -2  -1   43.18    1.16
  -2   5  -1   44.13    1.14
   5   2  -1   42.63    1.15
   2  -5  -1   42.58    1.15
   2  -5   1   43.06    1.13
   5   2   1   43.37    1.14
  -2   5   1   42.18    1.15
  -5  -2   1   39.02    1.16
  -5  -1  -1   81.78    2.20
   1  -5  -1   80.60    2.21
  -5  -1  -1   90.69    2.21
  -1   5  -1   90.05    2.21
  -1   5  -1   85.72    2.21
   5   1  -1   81.93    2.21
  -5  -1   1   90.89    2.22
   5   1   1   87.40    2.20
   1  -5   1   86.85    2.20
  -5  -1   1   86.55    2.22
  -1   5   1   87.12    2.21
   0  -5  -1    0.12    0.10
   0  -5  -1    0.13    0.09
  -5   0  -1    0.03    0.08
  -5   0  -1    0.17    0.08
   5   0  -1    0.11    0.09
   0   5  -1    0.18    0.09
   0   5  -1    0.13    0.09
  -5   0   1    0.12    0.09
   0  -5   1    0.17    0.08
  -5   0   1    0.08    0.09
   5   0   1    0.12    0.08
   0   5   1    0.11    0.09
  -5   1  -1   25.36    0.67
   1   5  -1   24.01    0.69
  -1  -5  -1   25.03    0.69
   1   5  -1   24.45    0.69
  -5   1  -1   23.67    0.67
  -1  -5   1   22.39    0.68
   1   5   1   23.40    0.68
   5  -1   1   23.86    0.66
  -5   1   1   25.40    0.69
  -5   1   1   23.27    0.69
  -5   2  -1    1.06    0.11
   5  -2  -1    0.86    0.11
  -5   2  -1    0.94    0.10
  -2  -5  -1    0.99    0.12
  -2  -5  -1    0.87    0.14
   2   5  -1    1.65    0.16
   2   5  -1    1.07    0.13
   5  -2   1    1.05    0.11
  -5   2   1    0.93    0.13
   2   5   1    1.14    0.13
  -5   2   1    1.01    0.12
  -2  -5   1    1.10    0.14
  -5   3  -1    1.09    0.11
  -3  -5  -1    0.89    0.15
   5  -3  -1    1.05    0.14
  -5   3  -1    1.03    0.12
  -3  -5  -1    1.49    0.15
   3   5  -1    0.92    0.13
   3   5   1    1.01    0.14
   5  -3   1    1.05    0.11
  -3  -5   1    0.84    0.15
  -5   3   1    0.81    0.12
   4   5  -1   48.02    1.32
  -5   4  -1   47.67    1.29
  -5   4  -1   52.71    1.30
   5  -4  -1   45.02    1.30
  -4  -5  -1   52.95    1.33
  -4  -5  -1   47.55    1.34
   4   5   1   47.82    1.31
   5  -4   1   49.31    1.28
  -4  -5   1   46.64    1.34
  -5   4   1   46.63    1.31
   5  -5  -1    6.02    0.30
  -5  -5  -1    6.96    0.36
   5   5  -1    6.41    0.33
  -5   5  -1    6.75    0.29
  -5   5  -1    6.07    0.31
   5   5   1    6.58    0.32
  -5   5   1    6.49    0.33
   5  -5   1    6.80    0.28
  -5  -5   1    6.55    0.37
   5  -6  -1    8.47    0.37
  -5   6  -1    8.52    0.37
   6   5  -1    8.17    0.39
  -6  -5  -1    8.32    0.42
  -5   6  -1    9.66    0.36
   6   5   1    9.28    0.37
  -6  -5   1    8.13    0.42
   5  -6   1    8.98    0.34
  -5   6   1    8.12    0.39
  -4   6  -1    3.37    0.25
   4  -6  -1    3.75    0.25
  -6  -4  -1    3.71    0.29
  -6  -4  -1    3.43    0.25
  -4   6  -1    3.21    0.23
   6   4  -1    3.50    0.27
  -4   6   1    3.32    0.27
  -6  -4   1    3.04    0.24
   4  -6   1    3.26    0.21
   6   4   1    3.43    0.24
   3  -6  -1    9.94    0.38
   6   3  -1   10.23    0.40
  -6  -3  -1    9.46    0.40
  -3   6  -1    9.53    0.36
  -3   6  -1    9.93    0.38
  -6  -3  -1   10.91    0.39
  -3   6   1    9.69    0.39
   6   3   1   10.33    0.38
  -6  -3   1   10.36    0.42
   3  -6   1   10.47    0.36
   6   2  -1  101.05    2.63
  -6  -2  -1  105.16    2.63
   2  -6  -1   98.03    2.62
  -2   6  -1  107.21    2.62
  -6  -2  -1  101.04    2.63
  -2   6  -1  101.94    2.62
   6   2   1  103.81    2.62
  -2   6   1  101.25    2.62
  -6  -2   1   99.03    2.64
   2  -6   1  103.38    2.61
   1  -6  -1   23.70    0.69
  -6  -1  -1   22.52    0.67
  -1   6  -1   21.56    0.67
  -1   6  -1   24.62    0.68
   6   1  -1   23.25    0.68
  -6  -1  -1   23.86    0.67
  -6  -1   1   22.56    0.69
  -1   6   1   23.32    0.68
   1  -6   1   21.89    0.66
   6   1   1   23.68    0.67
  -6   0  -1    6.70    0.29
   0   6  -1    6.91    0.30
   0  -6  -1    6.70    0.31
   0   6  -1    7.06    0.30
  -6   0  -1    7.16    0.28
   6   0  -1    6.62    0.29
   0   6   1    6.92    0.31
   6   0   1    6.63    0.28
  -6   0   1    6.73    0.30
   0  -6   1    6.93    0.30
   1   6  -1   85.41    2.23
   1   6  -1   89.59    2.24
  -6   1  -1   84.17    2.21
  -1  -6  -1   82.51    2.23
  -6   1  -1   85.97    2.21
   6  -1  -1   88.50    2.23
   1   6   1   83.87    2.23
   6  -1   1   86.81    2.21
  -6   1   1   86.60    2.23
  -1  -6   1   86.94    2.23
  -6   2  -1    0.35    0.11
   6  -2  -1    0.28    0.12
  -6   2  -1    0.40    0.10
  -2  -6  -1    0.65    0.13
   2   6  -1    0.33    0.12
  -2  -6   1    0.35    0.14
   6  -2   1    0.17    0.09
   2   6   1    0.26    0.13
  -6   2   1    0.19    0.11
   6  -3  -1  465.84   11.76
   3   6  -1  452.50   11.83
  -3  -6  -1  451.47   11.78
  -6   3  -1  487.56   11.77
  -6   3   1  454.45   11.83
  -3  -6   1  462.55   11.66
   3   6   1  448.38   11.77
   6  -3   1  480.21   11.75
  -6   4  -1    7.11    0.29
   6  -4  -1    6.09    0.32
   4   6  -1    7.27    0.35
  -4  -6  -1    6.66    0.37
  -6   4  -1    6.34    0.31
   4   6   1    6.16    0.32
   6  -4   1    6.60    0.28
  -4  -6   1    6.31    0.37
  -6   4   1    6.64    0.33
  -6   5  -1   33.17    0.92
   6  -5  -1   32.18    0.93
   5   6  -1   32.65    0.96
  -5  -6  -1   31.26    0.98
  -6   5  -1   31.68    0.92
  -5  -6   1   31.72    0.98
   6  -5   1   34.14    0.91
   5   6   1   32.34    0.94
   6   6  -1   44.58    1.31
  -6   6  -1   51.74    1.29
   6  -6  -1   45.22    1.29
  -6   6  -1   44.26    1.28
  -6  -6  -1   46.39    1.34
   6   6   1   47.41    1.30
  -6   6   1   45.59    1.30
   6  -6   1   48.50    1.27
  -6  -6   1   46.36    1.35
  -6   7  -1    0.45    0.16
   7   6  -1    0.62    0.20
   6  -7  -1    0.69    0.17
  -6   7  -1    0.64    0.15
  -7  -6  -1    0.31    0.19
  -7  -6   1    0.37    0.20
   6  -7   1    0.40    0.12
  -6   7   1    0.72    0.19
   7   6   1    0.64    0.17
  -5   7  -1    2.28    0.21
   5  -7  -1    1.72    0.19
  -7  -5  -1    1.45    0.21
  -5   7  -1    2.59    0.21
   7   5  -1    2.01    0.22
   7   5   1    1.69    0.19
   5  -7   1    1.72    0.17
  -5   7   1    1.92    0.21
   4  -7  -1    0.67    0.16
  -7  -4  -1    0.67    0.17
   7   4  -1    0.79    0.17
  -4   7  -1    0.83    0.15
  -4   7  -1    0.51    0.15
   7   4   1    0.65    0.15
  -4   7   1    0.83    0.17
  -7  -4   1    0.34    0.16
   4  -7   1    0.66    0.13
   3  -7  -1  102.24    2.76
  -7  -3  -1  110.30    2.77
  -7  -3  -1  104.17    2.77
  -3   7  -1  113.26    2.76
   7   3  -1  104.10    2.77
  -3   7  -1  104.27    2.75
  -3   7   1  108.57    2.77
   7   3   1  108.11    2.76
  -7  -3   1  105.37    2.79
   3  -7   1  108.62    2.74
  -2   7  -1    0.21    0.11
  -7  -2  -1    0.09    0.12
  -2   7  -1    0.05    0.13
   2  -7  -1    0.06    0.12
  -7  -2  -1    0.37    0.13
   7   2   1    0.19    0.12
  -2   7   1    0.28    0.14
   2  -7   1    0.15    0.12
  -7  -2   1    0.29    0.14
   7   1  -1   38.04    1.06
  -7  -1  -1   37.59    1.05
  -1   7  -1   40.44    1.05
  -1   7  -1   37.45    1.05
  -7  -1  -1   39.62    1.05
   1  -7  -1   36.56    1.05
   7   1   1   37.76    1.04
  -7  -1   1   37.06    1.06
  -1   7   1   37.03    1.05
   1  -7   1   35.05    1.03
   0   7  -1   18.28    0.58
   7   0  -1   17.83    0.58
   0   7  -1   19.53    0.59
  -7   0  -1   17.61    0.57
   0  -7  -1   17.92    0.59
   7   0   1   18.11    0.56
   0  -7   1   18.01    0.58
   0   7   1   17.23    0.58
  -7   1  -1   23.69    0.71
  -7   1  -1   25.41    0.71
   7  -1  -1   23.30    0.72
  -1  -7  -1   23.80    0.74
   1   7  -1   23.77    0.73
   1   7   1   23.51    0.73
   7  -1   1   23.79    0.70
  -7   1   1   24.24    0.73
  -1  -7   1   24.42    0.73
  -2  -7  -1  318.83    7.97
   7  -2  -1  315.09    7.94
   2   7  -1  300.66    7.95
  -7   2  -1  336.00    8.02
  -7   2  -1  323.57    8.19
   2   7   1  313.27    7.95
   7  -2   1  336.50    8.09
  -2  -7   1  318.51    7.96
  -7   2   1  297.74    7.94
   3   7  -1  248.74    6.19
  -7   3  -1  248.76    6.27
  -7   3  -1  260.23    6.16
   7  -3  -1  251.80    6.18
  -3  -7  -1  237.28    6.20
  -7   3   1  234.71    6.17
   3   7   1  244.42    6.18
  -3  -7   1  236.76    6.20
   7  -3   1  247.91    6.15
  -7   4  -1  366.41   11.46
   4   7  -1  359.19    9.22
   7  -4  -1  357.22    9.20
  -4  -7  -1  366.52    9.24
  -7   4  -1  378.47    9.19
  -4  -7   1  365.18    9.25
   4   7   1  363.51    9.34
  -7   4   1  370.67    9.33
   7  -4   1  388.46    9.35
  -7   5  -1   35.11    1.03
   5   7  -1   34.47    1.07
   7  -5  -1   38.28    1.05
  -5  -7  -1   36.90    1.10
  -7   5  -1   40.22    1.04
   7  -5   1   35.57    1.01
   5   7   1   35.34    1.05
  -5  -7   1   35.22    1.10
  -7   5   1   37.00    1.06
   7  -6  -1    7.22    0.37
   6   7  -1    6.95    0.40
  -7   6  -1    7.35    0.34
  -7   6  -1    7.28    0.37
  -6  -7  -1    6.68    0.43
  -7   6   1    6.91    0.39
  -6  -7   1    6.74    0.44
   7  -6   1    6.64    0.33
   7  -7  -1   28.37    0.90
   7   7  -1   29.75    0.94
  -7  -7  -1   29.58    0.97
  -7   7  -1   30.08    0.91
  -7  -7   1   28.79    0.98
  -7   7   1   30.06    0.93
   7  -7   1   30.92    0.88
   7   7   1   30.14    0.92
  -8  -7  -1    8.41    0.51
   8   7  -1    8.16    0.45
   7  -8  -1    7.91    0.41
  -7   8  -1    8.33    0.44
  -8  -7   1    8.11    0.50
   8   7   1    7.79    0.43
   7  -8   1    8.41    0.38
  -7   8   1    8.33    0.46
   8   6  -1   84.21    2.27
  -6   8  -1   85.42    2.24
   6  -8  -1   86.04    2.25
  -8  -6  -1   84.58    2.29
   8   6   1   85.23    2.25
   6  -8   1   83.98    2.22
  -8  -6   1   81.06    2.30
  -6   8   1   84.15    2.25
   8   5  -1   49.89    1.42
   5  -8  -1   51.03    1.40
  -5   8  -1   52.26    1.40
  -8  -5  -1   49.23    1.44
   5  -8   1   51.91    1.38
   8   5   1   50.25    1.40
  -5   8   1   48.53    1.41
  -8  -5   1   50.19    1.45
  -4   8  -1    1.41    0.20
   8   4  -1    1.52    0.21
  -8  -4  -1    1.33    0.21
   4  -8  -1    1.81    0.21
   4  -8   1    1.62    0.18
  -8  -4   1    1.55    0.23
   8   4   1    1.35    0.18
  -4   8   1    1.33    0.19
  -8  -3  -1    0.68    0.18
  -3   8  -1    0.81    0.18
   8   3  -1    0.45    0.17
   3  -8  -1    0.49    0.15
  -3   8   1    0.71    0.19
   8   3   1    0.68    0.15
   3  -8   1    0.61    0.14
  -8  -3   1    0.83    0.18
  -8  -2  -1    6.53    0.35
   2  -8  -1    6.45    0.34
  -2   8  -1    5.73    0.33
  -8  -2  -1    6.65    0.32
   8   2  -1    6.29    0.34
   2  -8   1    6.49    0.32
  -2   8   1    6.42    0.34
   8   2   1    6.63    0.32
  -8  -1  -1    0.21    0.13
  -8  -1  -1    0.14    0.12
   8   1  -1    0.02    0.14
  -1   8  -1    0.18    0.14
   1  -8  -1    0.03    0.14
   1  -8   1    0.09    0.12
   8   1   1    0.30    0.12
  -8  -1   1    0.71    0.16
  -1   8   1    0.23    0.15
   8   0  -1   23.35    0.73
  -8   0  -1   23.50    0.72
   0   8  -1   23.48    0.74
   0  -8  -1   24.05    0.75
  -8   0  -1   25.37    0.72
   0   8   1   22.03    0.73
   8   0   1   24.33    0.71
   0  -8   1   23.62    0.73
  -8   0   1   24.06    0.74
   8  -1  -1  104.49    2.75
  -8   1  -1  101.08    2.73
  -1  -8  -1  107.29    2.77
   1   8  -1  107.40    2.76
  -8   1  -1  113.62    2.74
   1   8   1  105.65    2.76
   8  -1   1  109.33    2.73
  -1  -8   1  105.67    2.76
  -8   1   1  101.54    2.75
  -8   2  -1   45.11    1.22
   2   8  -1   42.82    1.24
   8  -2  -1   42.65    1.22
  -2  -8  -1   45.56    1.26
  -8   2  -1   46.62    1.21
  -2  -8   1   43.44    1.25
  -8   2   1   43.43    1.23
   2   8   1   42.40    1.23
   8  -2   1   44.47    1.20
   3   8  -1  346.12    8.72
   8  -3  -1  352.24    8.70
  -8   3  -1  351.04    8.69
  -8   3  -1  336.05    8.68
  -3  -8  -1  347.31    8.73
  -3  -8   1  350.48    8.74
  -8   3   1  346.99    8.71
   3   8   1  346.60    8.71
   8  -3   1  351.06    8.77
   4   8  -1   51.00    1.44
  -4  -8  -1   50.74    1.46
  -8   4  -1   55.34    1.41
   8  -4  -1   51.73    1.41
  -8   4  -1   49.47    1.40
  -4  -8   1   50.90    1.46
   8  -4   1   52.11    1.39
  -8   4   1   52.52    1.43
   4   8   1   48.87    1.43
  -8   5  -1   90.78    2.44
  -8   5  -1   98.47    2.44
   5   8  -1   88.75    2.47
  -5  -8  -1   96.07    2.51
   8  -5  -1   90.63    2.44
  -5  -8   1   95.53    2.51
   8  -5   1   94.61    2.42
  -8   5   1   91.71    2.46
   5   8   1   92.38    2.46
   6   8  -1    0.95    0.20
  -6  -8  -1    1.20    0.25
  -8   6  -1    0.92    0.19
   8  -6  -1    1.08    0.21
  -8   6   1    0.86    0.20
   6   8   1    1.08    0.20
  -6  -8   1    0.83    0.25
   8  -6   1    1.45    0.18
  -8   7  -1   20.90    0.71
   8  -7  -1   20.54    0.71
  -7  -8  -1   20.18    0.78
   7   8  -1   20.66    0.74
  -8   7   1   21.41    0.73
   7   8   1   21.63    0.72
   8  -7   1   20.64    0.68
  -7  -8   1   19.85    0.78
  -8  -8  -1   18.82    0.77
  -8   8  -1   19.63    0.70
   8   8  -1   19.00    0.72
   8  -8  -1   19.35    0.69
  -8  -8   1   19.70    0.78
   8  -8   1   19.85    0.66
  -8   8   1   19.18    0.71
   8   8   1   18.56    0.70
   9   8  -1    5.13    0.44
   8  -9  -1    5.33    0.40
  -9  -8  -1    4.66    0.40
  -8   9  -1    6.05    0.43
   9   8   1    5.28    0.42
  -8   9   1    5.68    0.44
   8  -9   1    5.57    0.37
  -9  -8   1    6.11    0.46
   9   7  -1    5.34    0.43
  -9  -7  -1    4.80    0.39
  -7   9  -1    4.76    0.40
   7  -9  -1    5.35    0.38
  -7   9   1    5.37    0.41
  -9  -7   1    5.66    0.47
   9   7   1    5.17    0.39
   7  -9   1    5.30    0.33
   9   6  -1   30.22    0.97
  -6   9  -1   29.95    0.95
  -9  -6  -1   30.68    1.00
   6  -9  -1   30.65    0.95
   6  -9   1   30.68    0.92
  -9  -6   1   30.99    1.01
   9   6   1   29.83    0.95
  -6   9   1   30.79    0.97
   5  -9  -1   29.26    0.89
   9   5  -1   28.35    0.91
  -9  -5  -1   29.60    0.93
  -5   9  -1   28.15    0.88
   9   5   1   27.47    0.88
  -5   9   1   27.49    0.90
   5  -9   1   27.20    0.85
  -4   9  -1  155.55    3.94
  -9  -4  -1  150.32    3.97
   9   4  -1  156.29    3.96
   4  -9  -1  156.91    3.94
  -4   9   1  149.89    3.95
  -9  -4   1  155.34    3.98
   9   4   1  151.15    3.94
   4  -9   1  152.13    3.92
  -9  -3  -1   15.43    0.61
   9   3  -1   17.23    0.61
  -3   9  -1   16.21    0.60
  -3   9   1   16.61    0.61
  -9  -3   1   16.71    0.62
   9   3   1   16.81    0.58
   3  -9   1   16.07    0.57
   2  -9  -1   18.93    0.65
  -9  -2  -1   19.20    0.66
   9   2  -1   18.38    0.65
  -2   9  -1   19.24    0.65
   9   2   1   19.12    0.63
  -2   9   1   18.53    0.65
  -9  -2   1   19.64    0.67
   2  -9   1   19.45    0.63
  -9  -1  -1   25.50    0.81
   9   1  -1   26.91    0.82
  -1   9  -1   27.03    0.82
  -1   9   1   25.37    0.82
   9   1   1   27.36    0.80
  -9  -1   1   25.66    0.83
   1  -9   1   25.67    0.80
   0   9  -1    1.71    0.21
   0  -9  -1    1.57    0.21
  -9   0  -1    1.92    0.21
  -9   0  -1    1.74    0.18
   9   0   1    1.62    0.18
   0  -9   1    1.24    0.19
  -9   0   1    1.47    0.20
   0   9   1    2.10    0.23
   9  -1  -1    5.97    0.33
  -9   1  -1    5.56    0.33
  -1  -9  -1    5.50    0.37
  -9   1  -1    6.92    0.32
   1   9   1    5.54    0.36
  -1  -9   1    5.09    0.35
   9  -1   1    5.14    0.30
  -9   1   1    5.72    0.35
   9  -2  -1  145.58    3.69
   2   9  -1  140.72    3.70
  -9   2  -1  151.23    3.68
  -2  -9  -1  144.26    3.72
  -9   2  -1  138.18    3.67
   2   9   1  139.90    3.70
   9  -2   1  144.78    3.67
  -2  -9   1  144.59    3.71
  -9   2   1  142.72    3.69
   3   9  -1  126.14    3.34
  -9   3  -1  122.48    3.30
   9  -3  -1  126.35    3.31
  -3  -9  -1  130.73    3.36
  -9   3  -1  136.98    3.31
  -3  -9   1  130.47    3.36
   9  -3   1  129.27    3.29
  -9   3   1  127.42    3.32
   3   9   1  125.53    3.33
   9  -4  -1  242.11    6.28
   4   9  -1  242.65    6.31
  -4  -9  -1  248.59    6.34
  -9   4  -1  265.80    6.28
  -9   4  -1  247.35    6.28
  -9   4   1  243.58    6.29
   4   9   1  251.53    6.31
   9  -4   1  249.82    6.26
  -4  -9   1  248.10    6.34
   9  -5  -1   31.72    0.97
  -9   5  -1   31.53    0.97
   5   9  -1   31.22    1.00
  -5  -9  -1   32.65    1.05
  -9   5   1   32.37    0.99
   9  -5   1   33.32    0.95
   5   9   1   33.36    1.00
  -5  -9   1   32.02    1.04
   9  -6  -1   13.44    0.54
   6   9  -1   13.58    0.57
  -6  -9  -1   13.75    0.63
  -9   6  -1   14.01    0.55
  -9   6   1   13.15    0.56
   9  -6   1   13.27    0.51
  -6  -9   1   13.13    0.63
   6   9   1   13.84    0.57
   9  -7  -1    9.49    0.47
  -9   7  -1    9.37    0.47
   7   9  -1    8.81    0.50
  -7  -9  -1    8.69    0.56
   7   9   1    8.69    0.48
  -9   7   1    9.63    0.50
   9  -7   1    9.85    0.43
  -7  -9   1   10.17    0.58
  -8  -9  -1   37.78    1.25
  -9   8  -1   38.55    1.17
   8   9  -1   40.17    1.21
   9  -8  -1   37.05    1.16
  -9   8   1   38.09    1.18
  -8  -9   1   38.78    1.26
   8   9   1   39.96    1.19
   9  -8   1   38.41    1.13
  -9   9  -1   39.51    1.25
   9  -9  -1   41.33    1.25
  -9  -9  -1   39.90    1.33
   9   9  -1   40.63    1.28
   9   9   1   41.61    1.26
   9  -9   1   41.66    1.21
  -9  -9   1   42.74    1.34
  -9   9   1   40.52    1.26
   9 -10  -1    7.13    0.49
  -9  10  -1    6.58    0.52
  10   9  -1    6.65    0.52
 -10  -9  -1    7.02    0.52
 -10  -9   1    7.48    0.54
  -9  10   1    6.71    0.54
   9 -10   1    6.77    0.45
  10   9   1    6.41    0.48
 -10  -8  -1    0.03    0.27
  10   8  -1    0.05    0.22
  -8  10  -1   -0.13    0.23
   8 -10  -1    0.12    0.21
  -8  10   1   -0.18    0.24
   8 -10   1   -0.04    0.17
  10   8   1   -0.27    0.21
 -10  -8   1    0.23    0.28
 -10  -7  -1   22.94    0.89
  -7  10  -1   24.40    0.83
   7 -10  -1   23.41    0.82
  10   7  -1   24.39    0.85
  10   7   1   23.32    0.83
 -10  -7   1   23.96    0.90
   7 -10   1   24.01    0.78
  -7  10   1   24.06    0.86
   6 -10  -1    3.03    0.29
 -10  -6  -1    3.17    0.33
  10   6  -1    2.48    0.29
  -6  10  -1    2.74    0.28
 -10  -6   1    2.51    0.30
  -6  10   1    2.13    0.27
  10   6   1    2.46    0.26
   6 -10   1    2.57    0.24
  -5  10  -1  269.43    6.63
  10   5  -1  256.97    6.64
   5 -10  -1  259.48    6.63
 -10  -5  -1  257.02    6.66
  -5  10   1  262.76    6.64
 -10  -5   1  261.51    6.68
   5 -10   1  260.38    6.60
  10   5   1  264.49    6.63
  -4  10  -1   39.02    1.16
 -10  -4  -1   38.63    1.18
  10   4  -1   37.65    1.16
   4 -10  -1   39.78    1.16
  -4  10   1   39.40    1.17
  10   4   1   38.72    1.15
   4 -10   1   38.60    1.13
 -10  -4   1   38.00    1.19
 -10  -3  -1  203.12    5.21
   3 -10  -1  197.98    5.19
  10   3  -1  203.71    5.20
  -3  10  -1  201.32    5.19
  10   3   1  210.87    5.19
 -10  -3   1  204.76    5.22
   3 -10   1  205.86    5.18
  -3  10   1  201.70    5.20
  10   2  -1   36.58    1.09
   2 -10  -1   36.86    1.09
 -10  -2  -1   37.71    1.10
  -2  10  -1   34.81    1.09
   2 -10   1   36.76    1.07
 -10  -2   1   35.76    1.10
  10   2   1   36.98    1.07
  -2  10   1   35.20    1.09
  10   1  -1    0.98    0.20
   1 -10  -1    1.25    0.22
 -10  -1  -1    0.99    0.21
  -1  10  -1    0.58    0.19
 -10  -1   1    0.70    0.20
   1 -10   1    0.76    0.18
  10   1   1    1.28    0.19
  -1  10   1    0.89    0.20
   0  10  -1   68.78    1.86
  10   0  -1   67.58    1.84
   0 -10  -1   69.28    1.86
 -10   0  -1   67.85    1.84
 -10   0   1   67.30    1.86
  10   0   1   68.64    1.82
   0  10   1   66.64    1.85
   0 -10   1   66.13    1.84
  -1 -10  -1    5.32    0.40
 -10   1  -1    5.61    0.36
   1  10  -1    5.21    0.38
  10  -1  -1    5.42    0.37
  -1 -10   1    5.19    0.38
   1  10   1    5.20    0.38
 -10   1   1    5.52    0.37
  10  -1   1    5.30    0.32
  -2 -10  -1    0.15    0.22
   2  10  -1    0.24    0.21
  10  -2  -1    0.34    0.18
 -10   2  -1    0.24    0.18
 -10   2   1    0.30    0.18
  -2 -10   1    0.32    0.21
   2  10   1    0.24    0.20
  10  -2   1    0.28    0.15
 -10   3  -1   23.99    0.78
   3  10  -1   23.73    0.82
  10  -3  -1   23.99    0.78
  -3 -10  -1   24.75    0.85
  -3 -10   1   23.09    0.83
   3  10   1   24.56    0.81
  10  -3   1   24.99    0.76
 -10   3   1   24.31    0.81
  10  -4  -1    0.93    0.21
   4  10  -1    0.87    0.23
 -10   4  -1    0.79    0.20
  -4 -10  -1    0.79    0.23
  10  -4   1    0.89    0.18
   4  10   1    0.90    0.22
 -10   4   1    0.74    0.21
  -4 -10   1    0.67    0.25
  10  -5  -1    0.80    0.19
   5  10  -1    1.24    0.24
 -10   5  -1    0.84    0.21
  -5 -10  -1    1.30    0.29
  -5 -10   1    0.46    0.24
   5  10   1    0.87    0.21
  10  -5   1    0.73    0.17
 -10   5   1    0.70    0.22
  10  -6  -1    9.56    0.47
  -6 -10  -1    8.02    0.56
   6  10  -1   10.12    0.51
 -10   6  -1    9.19    0.48
 -10   6   1    8.66    0.50
  -6 -10   1    9.05    0.57
  10  -6   1    9.05    0.43
   6  10   1    8.30    0.48
   7  10  -1   24.90    0.88
  10  -7  -1   24.94    0.83
  -7 -10  -1   24.00    0.93
  -7 -10   1   24.74    0.94
  10  -7   1   23.65    0.79
   7  10   1   26.34    0.87
 -10   7   1   24.44    0.86
  10  -8  -1   24.87    0.86
 -10   8  -1   24.98    0.88
   8  10  -1   25.75    0.91
  -8 -10  -1   25.00    0.97
  10  -8   1   25.30    0.83
 -10   8   1   25.00    0.89
  -8 -10   1   25.29    0.97
   8  10   1   25.94    0.90
  10  -9  -1    9.26    0.53
  -9 -10  -1    8.69    0.66
 -10   9  -1    8.74    0.56
   9  10  -1    8.82    0.57
  10  -9   1    8.45    0.47
 -10   9   1    9.85    0.59
   9  10   1    8.57    0.55
  -9 -10   1    9.24    0.66
  10 -10  -1   25.86    0.92
 -10 -10  -1   26.41    1.05
 -10  10  -1   27.35    0.96
  10  10  -1   25.27    0.97
 -10  10   1   25.40    0.96
 -10 -10   1   26.67    1.05
  10  10   1   25.25    0.94
  10 -10   1   25.96    0.88
  11  10  -1   18.35    0.81
  10 -11  -1   17.46    0.77
 -11 -10  -1   18.12    0.88
 -10  11  -1   17.54    0.80
  10 -11   1   16.68    0.71
  11  10   1   17.26    0.77
 -10  11   1   17.81    0.81
 -11 -10   1   18.15    0.88
  -9  11  -1    0.03    0.27
 -11  -9  -1    0.00    0.31
  11   9  -1    0.36    0.28
   9 -11  -1   -0.39    0.25
  11   9   1   -0.16    0.24
  -9  11   1   -0.06    0.28
   9 -11   1   -0.05    0.21
 -11  -9   1    0.50    0.34
  -8  11  -1    1.41    0.31
   8 -11  -1    1.12    0.27
  11   8  -1    1.22    0.29
 -11  -8  -1    1.06    0.34
 -11  -8   1    1.32    0.33
  -8  11   1    0.96    0.30
   8 -11   1    1.01    0.22
  11   8   1    1.18    0.26
  -7  11  -1   21.61    0.82
   7 -11  -1   22.60    0.81
 -11  -7  -1   21.65    0.89
  11   7  -1   22.42    0.84
 -11  -7   1   22.54    0.90
  11   7   1   21.51    0.80
  -7  11   1   21.93    0.83
   7 -11   1   21.68    0.76
  -6  11  -1  110.92    2.95
   6 -11  -1  112.22    2.95
 -11  -6  -1  113.86    3.01
  11   6  -1  109.38    2.97
  11   6   1  111.47    2.95
 -11  -6   1  109.03    3.00
   6 -11   1  108.92    2.92
  -6  11   1  111.68    2.96
  11   5  -1  148.80    3.88
   5 -11  -1  144.81    3.85
 -11  -5  -1  149.68    3.90
  -5  11  -1  146.02    3.86
   5 -11   1  148.92    3.84
  11   5   1  150.49    3.86
  -5  11   1  149.65    3.87
 -11  -5   1  147.79    3.91
   4 -11  -1  288.71    7.04
  -4  11  -1  275.40    7.03
 -11  -4  -1  274.63    7.06
  11   4  -1  274.15    7.04
  -4  11   1  283.36    7.05
 -11  -4   1  271.50    7.07
   4 -11   1  278.44    7.01
  11   4   1  272.94    7.02
  -3  11  -1   28.78    0.94
   3 -11  -1   28.21    0.92
 -11  -3  -1   28.42    0.94
  11   3  -1   27.42    0.93
 -11  -3   1   28.22    0.95
   3 -11   1   28.43    0.90
  -3  11   1   28.32    0.94
  11   3   1   27.88    0.90
 -11  -2  -1   14.43    0.61
   2 -11  -1   14.30    0.59
  11   2  -1   12.49    0.58
  -2  11  -1   12.82    0.59
   2 -11   1   15.01    0.57
  -2  11   1   13.65    0.59
  11   2   1   14.12    0.56
 -11  -2   1   13.74    0.61
   1 -11  -1   25.43    0.88
  -1  11  -1   26.08    0.88
  11   1  -1   26.87    0.87
 -11  -1  -1   27.75    0.88
  11   1   1   26.40    0.85
   1 -11   1   26.13    0.86
  -1  11   1   25.39    0.88
 -11  -1   1   26.91    0.89
 -11   0  -1   43.27    1.25
   0 -11  -1   42.81    1.27
   0  11  -1   41.53    1.26
  11   0  -1   42.51    1.25
  11   0   1   43.58    1.22
 -11   0   1   41.61    1.26
   0  11   1   41.07    1.26
   0 -11   1   42.97    1.26
 -11   1  -1    5.62    0.39
  -1 -11  -1    5.22    0.42
  11  -1  -1    4.95    0.37
   1  11  -1    4.46    0.34
   1  11   1    5.68    0.41
  -1 -11   1    4.55    0.34
  11  -1   1    4.91    0.35
 -11   1   1    3.47    0.30
  11  -2  -1   21.38    0.73
   2  11  -1   20.18    0.75
 -11   2  -1   20.97    0.73
  -2 -11  -1   21.25    0.79
  -2 -11   1   20.22    0.76
 -11   2   1   20.03    0.74
  11  -2   1   21.28    0.70
   2  11   1   21.26    0.75
  11  -3  -1    0.02    0.17
  -3 -11  -1   -0.05    0.24
 -11   3  -1    0.24    0.20
   3  11  -1   -0.04    0.20
  11  -3   1    0.08    0.16
   3  11   1    0.25    0.22
 -11   3   1    0.08    0.20
  -3 -11   1    0.19    0.22
 -11   4  -1    0.26    0.21
   4  11  -1    0.42    0.22
  11  -4  -1    0.14    0.20
  -4 -11  -1    0.07    0.23
  -4 -11   1    0.02    0.22
   4  11   1    0.21    0.22
 -11   4   1    0.06    0.21
  11  -4   1    0.22    0.17
 -11   5  -1    5.06    0.36
  11  -5  -1    4.74    0.39
   5  11  -1    3.97    0.35
  -5 -11  -1    4.28    0.38
  11  -5   1    5.10    0.36
 -11   5   1    4.52    0.36
  -5 -11   1    3.79    0.36
   5  11   1    5.11    0.42
  11  -6  -1   -0.12    0.20
  -6 -11  -1   -0.14    0.27
 -11   6  -1    0.19    0.22
   6  11  -1   -0.13    0.24
   6  11   1    0.48    0.24
 -11   6   1    0.15    0.23
  -6 -11   1   -0.06    0.26
  11  -6   1   -0.13    0.17
  11  -7  -1    1.51    0.26
  -7 -11  -1    1.77    0.36
 -11   7  -1    1.71    0.28
   7  11  -1    1.67    0.28
   7  11   1    1.69    0.30
 -11   7   1    1.85    0.31
  -7 -11   1    2.30    0.38
  11  -7   1    2.28    0.26
  11  -8  -1    0.73    0.24
   8  11  -1    0.61    0.26
 -11   8  -1    0.50    0.25
  -8 -11  -1    0.16    0.31
  -8 -11   1    0.48    0.31
   8  11   1    0.70    0.26
  11  -8   1    0.45    0.21
 -11   8   1    0.77    0.29
  11  -9  -1   80.08    2.23
  -9 -11  -1   80.10    2.34
   9  11  -1   80.63    2.28
 -11   9  -1   80.17    2.24
   9  11   1   81.55    2.26
  11  -9   1   79.84    2.19
  -9 -11   1   79.42    2.33
 -11   9   1   81.82    2.26
  11 -10  -1   10.14    0.59
 -10 -11  -1    9.28    0.74
 -11  10  -1   10.07    0.63
  10  11  -1    9.60    0.65
  11 -10   1   10.20    0.54
  10  11   1    9.95    0.62
 -10 -11   1    9.62    0.75
 -11  10   1   11.39    0.66
  11 -11  -1   16.60    0.77
  11  11  -1   17.56    0.82
 -11  11  -1   17.49    0.81
 -11 -11  -1   18.25    0.94
 -11  11   1   17.43    0.83
  11  11   1   17.34    0.78
 -11 -11   1   17.08    0.93
  12  11  -1   65.99    1.96
 -12 -11  -1   65.42    2.04
 -11  12  -1   63.42    1.92
  11 -12  -1   63.87    1.90
 -12 -11   1   65.49    2.04
  12  11   1   65.35    1.92
 -11  12   1   63.04    1.94
  12  10  -1   10.70    0.68
 -12 -10  -1   11.00    0.79
  10 -12  -1   10.02    0.64
 -10  12  -1    9.89    0.68
 -12 -10   1   10.15    0.79
  12  10   1   11.07    0.66
 -10  12   1    9.74    0.70
  -9  12  -1    0.05    0.28
 -12  -9  -1    0.09    0.35
  12   9  -1    0.03    0.29
   9 -12  -1    0.22    0.28
  -9  12   1    0.24    0.29
   9 -12   1    0.30    0.25
 -12  -9   1   -0.02    0.35
  12   9   1   -0.05    0.27
  12   8  -1   21.26    0.86
   8 -12  -1   20.30    0.82
  -8  12  -1   20.92    0.84
 -12  -8  -1   19.30    0.92
  12   8   1   20.86    0.83
   8 -12   1   21.80    0.78
  -8  12   1   21.40    0.86
 -12  -8   1   21.68    0.93
  12   7  -1   10.09    0.60
   7 -12  -1    9.72    0.56
  -7  12  -1    9.62    0.59
 -12  -7  -1   10.20    0.65
   7 -12   1    9.62    0.52
  12   7   1   10.17    0.58
 -12  -7   1   10.08    0.67
 -12  -6  -1   14.76    0.73
   6 -12  -1   15.70    0.67
  12   6  -1   15.31    0.70
   6 -12   1   14.47    0.62
  12   6   1   15.93    0.66
 -12  -6   1   15.86    0.75
  -6  12   1   15.05    0.71
  -5  12  -1   56.12    1.59
   5 -12  -1   52.65    1.56
 -12  -5  -1   53.40    1.61
  12   5  -1   53.58    1.58
  12   5   1   52.18    1.55
  -5  12   1   53.83    1.59
   5 -12   1   56.57    1.54
 -12  -5   1   51.56    1.62
 -12  -4  -1   39.83    1.25
  -4  12  -1   38.72    1.22
   4 -12  -1   37.67    1.20
  12   4  -1   39.11    1.22
   4 -12   1   39.82    1.18
 -12  -4   1   40.83    1.26
  12   4   1   38.71    1.19
  -4  12   1   37.79    1.23
   3 -12  -1   54.35    1.58
  -3  12  -1   53.10    1.58
  12   3  -1   54.50    1.58
 -12  -3  -1   54.53    1.59
  12   3   1   54.09    1.55
  -3  12   1   55.22    1.59
 -12  -3   1   54.14    1.61
   3 -12   1   54.92    1.55
   2 -12  -1    1.45    0.27
  -2  12  -1    1.39    0.30
  12   2  -1    0.97    0.25
 -12  -2  -1    1.47    0.27
  -2  12   1    1.20    0.25
 -12  -2   1    0.85    0.27
  12   2   1    1.18    0.23
   2 -12   1    1.39    0.25
  12   1  -1    8.21    0.49
 -12  -1  -1    7.63    0.50
   1 -12  -1    8.66    0.50
  -1  12  -1    7.88    0.50
  12   1   1    7.93    0.44
   1 -12   1    8.04    0.47
 -12  -1   1    8.49    0.53
  -1  12   1    7.91    0.50
   0 -12  -1    0.05    0.23
   0  12  -1   -0.09    0.23
 -12   0  -1   -0.02    0.22
  12   0  -1    0.12    0.21
  12   0   1   -0.10    0.18
 -12   0   1   -0.13    0.23
   0 -12   1    0.44    0.23
   0  12   1    0.12    0.23
  12  -1  -1   32.21    1.02
   1  12  -1   31.51    1.05
 -12   1  -1   32.84    1.03
  -1 -12  -1   31.90    1.06
 -12   1   1   31.83    1.04
   1  12   1   31.53    1.04
  12  -1   1   31.74    0.99
  -1 -12   1   33.07    1.05
   2  12  -1    0.31    0.26
 -12   2  -1    0.03    0.20
  -2 -12  -1   -0.05    0.25
  12  -2  -1    0.00    0.21
  12  -2   1    0.07    0.18
  -2 -12   1   -0.03    0.24
 -12   2   1    0.00    0.22
   2  12   1    0.07    0.23
   3  12  -1    0.34    0.26
  12  -3  -1    0.41    0.22
  -3 -12  -1    0.47    0.30
 -12   3  -1    0.49    0.24
 -12   3   1    0.32    0.24
  12  -3   1    0.63    0.20
  -3 -12   1    0.60    0.27
   3  12   1    0.42    0.25
 -12   4  -1   31.85    1.02
   4  12  -1   31.20    1.06
  12  -4  -1   32.10    1.02
  -4 -12  -1   33.05    1.11
  -4 -12   1   32.13    1.10
 -12   4   1   30.55    1.04
   4  12   1   31.00    1.05
  12  -4   1   31.70    0.98
  -5 -12  -1   12.89    0.69
 -12   5  -1   13.41    0.61
  12  -5  -1   12.23    0.58
   5  12  -1   13.60    0.65
  -5 -12   1   12.63    0.69
 -12   5   1   12.63    0.64
   5  12   1   13.02    0.64
  12  -5   1   12.63    0.54
  12  -6  -1   44.67    1.32
  -6 -12  -1   43.72    1.41
   6  12  -1   43.29    1.37
 -12   6  -1   42.87    1.32
 -12   6   1   42.38    1.34
   6  12   1   43.77    1.35
  -6 -12   1   44.16    1.42
  12  -6   1   44.03    1.28
   7  12  -1    2.77    0.36
 -12   7  -1    2.09    0.30
  12  -7  -1    2.73    0.33
  -7 -12  -1    1.65    0.36
   7  12   1    1.98    0.31
  -7 -12   1    2.83    0.42
  12  -7   1    2.52    0.28
 -12   7   1    2.55    0.36
 -12   8  -1    3.08    0.35
  12  -8  -1    3.03    0.34
  -8 -12  -1    4.35    0.48
   8  12  -1    4.14    0.43
   8  12   1    3.66    0.39
  -8 -12   1    2.99    0.42
  12  -8   1    3.20    0.31
 -12   8   1    3.30    0.38
  -9 -12  -1   11.39    0.77
   9  12  -1   11.38    0.69
  12  -9  -1   12.28    0.65
 -12   9  -1   11.97    0.68
   9  12   1   11.92    0.67
  12  -9   1   12.28    0.58
 -12   9   1   12.05    0.71
  -9 -12   1   11.30    0.79
  12 -10  -1   -0.06    0.27
 -10 -12  -1    0.59    0.41
  10  12  -1    0.21    0.32
  10  12   1    0.05    0.29
 -12  10   1   -0.33    0.34
 -10 -12   1    0.03    0.40
 -11 -12  -1   16.62    0.96
  11  12  -1   17.70    0.86
  12 -11  -1   16.27    0.79
 -12  11  -1   16.09    0.82
  11  12   1   17.53    0.83
 -11 -12   1   19.03    0.99
 -12  11   1   15.70    0.87
  12  12  -1    1.33    0.39
  12 -12  -1    1.49    0.35
 -12  12  -1    0.99    0.37
 -12 -12  -1    2.02    0.47
 -12  12   1    1.65    0.41
  12  12   1    1.61    0.37
 -12 -12   1    2.32    0.48
 -12  13  -1   99.15    2.80
 -13 -12  -1  101.59    2.91
  13  12  -1   97.17    2.82
 -12  13   1   96.66    2.82
  13  12   1   96.06    2.79
 -13 -12   1  102.22    2.93
 -13 -11  -1    8.87    0.69
  13  11  -1    7.45    0.58
 -11  13  -1    6.32    0.53
  11 -13  -1    7.97    0.64
 -11  13   1    7.24    0.57
  13  11   1    8.15    0.64
 -13 -11   1    8.85    0.71
 -13 -10  -1   49.70    1.64
 -10  13  -1   47.36    1.56
  10 -13  -1   47.86    1.52
  13  10  -1   48.36    1.57
  13  10   1   49.34    1.54
 -10  13   1   48.36    1.58
 -13 -10   1   50.00    1.66
  -9  13  -1   22.00    0.95
  13   9  -1   23.42    0.96
 -13  -9  -1   23.82    1.05
   9 -13  -1   22.91    0.90
  -9  13   1   24.34    0.99
  13   9   1   22.32    0.92
 -13  -9   1   25.04    1.05
  -8  13  -1   15.57    0.77
   8 -13  -1   14.41    0.72
  13   8  -1   15.58    0.75
 -13  -8  -1   14.23    0.83
  -8  13   1   15.73    0.78
  13   8   1   15.31    0.72
 -13  -8   1   14.23    0.85
   8 -13   1   14.94    0.66
 -13  -7  -1    0.51    0.32
  13   7  -1    0.07    0.27
   7 -13  -1    0.49    0.28
  -7  13  -1    0.05    0.28
 -13  -7   1    0.26    0.33
   7 -13   1   -0.15    0.23
  13   7   1    0.05    0.24
  -7  13   1    0.37    0.32
  -6  13  -1    2.17    0.35
  13   6  -1    1.87    0.34
   6 -13  -1    1.40    0.30
 -13  -6  -1    1.69    0.37
   6 -13   1    1.83    0.29
 -13  -6   1    1.45    0.35
  13   6   1    1.37    0.29
  -6  13   1    1.17    0.32
 -13  -5  -1   17.54    0.78
  -5  13  -1   17.28    0.76
  13   5  -1   17.39    0.76
   5 -13  -1   16.71    0.73
 -13  -5   1   17.42    0.80
   5 -13   1   16.68    0.68
  -5  13   1   17.20    0.78
  13   5   1   17.19    0.71
 -13  -4  -1   12.77    0.67
  -4  13  -1   12.46    0.66
  13   4  -1   12.98    0.65
   4 -13  -1   14.42    0.64
 -13  -4   1   12.97    0.69
   4 -13   1   13.46    0.59
  13   4   1   13.36    0.62
  -4  13   1   12.72    0.68
   3 -13  -1   13.71    0.65
 -13  -3  -1   13.96    0.68
  13   3  -1   14.14    0.65
  -3  13  -1   14.55    0.68
 -13  -3   1   14.62    0.70
  -3  13   1   13.09    0.66
   3 -13   1   13.54    0.62
  13   3   1   14.03    0.62
  13   2  -1    7.83    0.51
 -13  -2  -1    7.31    0.54
   2 -13  -1    7.18    0.52
  -2  13  -1    7.64    0.54
 -13  -2   1    6.79    0.55
  13   2   1    8.02    0.48
   2 -13   1    7.23    0.49
  -2  13   1    7.55    0.52
   1 -13  -1   26.48    0.93
  13   1  -1   26.56    0.91
  -1  13  -1   25.16    0.93
 -13  -1  -1   25.52    0.92
   1 -13   1   23.99    0.89
  13   1   1   26.33    0.87
  -1  13   1   26.26    0.93
 -13  -1   1   25.60    0.93
   0  13  -1   16.50    0.73
 -13   0  -1   18.18    0.73
   0 -13  -1   17.03    0.74
  13   0  -1   17.02    0.70
 -13   0   1   18.30    0.75
   0  13   1   17.91    0.74
   0 -13   1   16.63    0.71
  13   0   1   17.14    0.67
  13  -1  -1   91.35    2.50
   1  13  -1   90.85    2.53
  -1 -13  -1   92.12    2.55
 -13   1  -1   91.64    2.51
 -13   1   1   94.94    2.54
  13  -1   1   93.48    2.48
  -1 -13   1   93.30    2.54
   1  13   1   90.11    2.52
  -2 -13  -1    0.11    0.28
 -13   2  -1   -0.06    0.23
   2  13  -1    0.81    0.27
  13  -2  -1   -0.15    0.22
  -2 -13   1    0.51    0.28
  13  -2   1   -0.16    0.20
   2  13   1   -0.17    0.23
 -13   2   1   -0.29    0.25
 -13   3  -1    0.41    0.24
   3  13  -1    0.17    0.27
  -3 -13  -1    0.38    0.30
  13  -3  -1    0.32    0.23
   3  13   1    0.63    0.28
 -13   3   1   -0.04    0.24
  13  -3   1    0.34    0.22
  -3 -13   1    0.52    0.30
  13  -4  -1    0.94    0.26
 -13   4  -1    1.27    0.28
   4  13  -1    1.41    0.31
  -4 -13  -1    1.56    0.37
  13  -4   1    1.37    0.25
   4  13   1    1.37    0.31
 -13   4   1    1.51    0.30
  -4 -13   1    1.13    0.34
 -13   5  -1    4.18    0.38
   5  13  -1    4.71    0.41
  -5 -13  -1    4.74    0.49
  13  -5  -1    4.38    0.37
 -13   5   1    3.73    0.37
   5  13   1    5.22    0.44
  -5 -13   1    5.09    0.48
  13  -5   1    4.92    0.35
 -13   6  -1   34.97    1.16
   6  13  -1   35.79    1.20
  13  -6  -1   36.14    1.14
  -6 -13  -1   34.52    1.25
 -13   6   1   35.28    1.19
   6  13   1   36.69    1.19
  13  -6   1   34.89    1.10
  -6 -13   1   33.47    1.25
 -13   7  -1    3.93    0.39
   7  13  -1    4.56    0.44
  13  -7  -1    4.72    0.41
  -7 -13  -1    3.25    0.45
   7  13   1    3.49    0.38
  13  -7   1    3.79    0.34
  -7 -13   1    3.12    0.43
 -13   7   1    3.38    0.38
  13  -8  -1   21.46    0.86
 -13   8  -1   21.92    0.88
   8  13  -1   22.88    0.93
  -8 -13  -1   21.33    1.00
 -13   8   1   22.83    0.92
   8  13   1   20.69    0.90
  -8 -13   1   21.79    1.02
  -9 -13  -1    0.98    0.42
 -13   9  -1    0.65    0.33
   9  13  -1    0.69    0.35
  13  -9  -1    0.65    0.31
 -13   9   1    0.89    0.36
   9  13   1    0.83    0.33
  -9 -13   1    0.49    0.40
  10  13  -1    2.66    0.43
 -10 -13  -1    3.13    0.48
  13 -10  -1    1.97    0.37
 -13  10  -1    2.67    0.42
 -10 -13   1    2.28    0.48
  10  13   1    2.70    0.41
 -13  10   1    3.14    0.45
 -13  11  -1    5.39    0.52
  11  13  -1    6.43    0.55
  13 -11  -1    6.82    0.54
 -11 -13  -1    7.99    0.68
  11  13   1    6.22    0.53
 -11 -13   1    6.77    0.65
 -13  11   1    7.48    0.61
 -12 -13  -1   29.98    1.30
  12  13  -1   30.71    1.19
 -13  12  -1   28.47    1.17
 -12 -13   1   30.49    1.30
  12  13   1   28.35    1.14
 -13  12   1   31.18    1.22
 -13 -13  -1   25.09    1.23
 -13  13  -1   22.38    1.07
  13  13  -1   22.87    1.08
  13  13   1   23.05    1.04
 -13 -13   1   24.66    1.23
 -13  13   1   23.95    1.11
  14  13  -1   67.38    2.18
 -13  14  -1   67.62    2.16
 -14 -13  -1   71.31    2.28
 -14 -13   1   72.69    2.32
 -13  14   1   73.00    2.20
  14  12  -1   25.50    1.12
 -14 -12  -1   25.67    1.25
 -12  14  -1   24.09    1.12
 -12  14   1   25.96    1.15
 -14 -12   1   28.27    1.30
 -14 -11  -1   60.32    1.96
  14  11  -1   59.88    1.88
 -11  14  -1   57.99    1.86
  14  11   1   58.29    1.83
 -14 -11   1   60.03    1.95
 -11  14   1   58.08    1.88
 -10  14  -1    3.92    0.49
  14  10  -1    5.05    0.52
  10 -14  -1    4.47    0.46
 -14 -10  -1    4.65    0.57
 -10  14   1    4.00    0.49
 -14 -10   1    4.39    0.58
  14  10   1    4.48    0.46
 -14  -9  -1    2.77    0.48
  14   9  -1    1.70    0.37
  -9  14  -1    2.21    0.42
   9 -14  -1    1.88    0.37
  -9  14   1    1.56    0.41
  14   9   1    2.15    0.37
 -14  -9   1    1.69    0.45
 -14  -8  -1   25.04    1.07
  -8  14  -1   24.94    1.00
   8 -14  -1   23.99    0.96
  14   8  -1   24.43    0.99
  14   8   1   24.77    0.96
 -14  -8   1   24.93    1.08
  -8  14   1   23.51    1.02
 -14  -7  -1   23.86    1.05
   7 -14  -1   25.65    0.97
  -7  14  -1   24.53    0.99
  14   7  -1   26.10    0.99
  -7  14   1   26.26    1.01
  14   7   1   24.40    0.94
 -14  -7   1   24.40    1.06
   7 -14   1   23.58    0.91
 -14  -6  -1    1.12    0.37
   6 -14  -1    0.63    0.29
  -6  14  -1    0.78    0.34
  14   6  -1    0.93    0.32
 -14  -6   1    0.97    0.37
   6 -14   1    0.47    0.27
  14   6   1    0.84    0.29
  -6  14   1    0.73    0.33
  -5  14  -1    5.54    0.46
  14   5  -1    7.34    0.56
   5 -14  -1    6.48    0.55
 -14  -5  -1    6.60    0.51
  -5  14   1    7.81    0.54
  14   5   1    6.89    0.52
   5 -14   1    6.60    0.50
 -14  -5   1    6.57    0.54
 -14  -4  -1    3.51    0.41
   4 -14  -1    2.71    0.34
  14   4  -1    2.61    0.33
  -4  14  -1    2.61    0.37
 -14  -4   1    2.96    0.37
  -4  14   1    2.41    0.37
   4 -14   1    2.89    0.32
  14   4   1    3.19    0.34
  14   3  -1    0.09    0.27
   3 -14  -1   -0.04    0.26
  -3  14  -1    0.04    0.27
 -14  -3  -1    0.06    0.29
  -3  14   1   -0.17    0.30
 -14  -3   1    0.22    0.30
  14   3   1    0.30    0.25
   3 -14   1    0.15    0.23
  14   2  -1   18.30    0.77
 -14  -2  -1   18.71    0.80
  -2  14  -1   17.47    0.79
   2 -14  -1   18.28    0.78
 -14  -2   1   18.32    0.82
  -2  14   1   18.21    0.80
  14   2   1   19.05    0.73
   2 -14   1   18.72    0.75
   1 -14  -1    0.63    0.29
  14   1  -1    0.34    0.27
 -14  -1  -1    0.71    0.29
  -1  14  -1    0.49    0.29
  -1  14   1    0.31    0.28
   1 -14   1    0.51    0.27
 -14  -1   1    0.41    0.28
  14   1   1    0.96    0.26
 -14   0  -1   27.44    1.00
  14   0  -1   27.73    0.98
   0 -14  -1   27.92    1.02
   0  14  -1   28.67    1.02
   0  14   1   27.08    1.01
   0 -14   1   29.09    1.00
  14   0   1   27.49    0.94
 -14   0   1   28.11    1.02
 -14   1  -1    1.31    0.29
   1  14  -1    2.26    0.34
  -1 -14  -1    1.50    0.32
  14  -1  -1    1.28    0.28
  -1 -14   1    1.16    0.32
 -14   1   1    1.05    0.31
   1  14   1    1.33    0.31
  14  -1   1    1.01    0.25
  -2 -14  -1   22.02    0.93
  14  -2  -1   23.18    0.85
 -14   2  -1   23.35    0.87
   2  14  -1   22.83    0.90
 -14   2   1   22.84    0.89
  14  -2   1   23.06    0.82
   2  14   1   21.67    0.88
  -2 -14   1   21.59    0.90
  -3 -14  -1    7.36    0.55
 -14   3  -1    6.57    0.54
  14  -3  -1    7.07    0.51
   3  14  -1    7.37    0.58
 -14   3   1    5.50    0.44
  14  -3   1    6.62    0.46
  -3 -14   1    6.98    0.59
   3  14   1    5.87    0.46
 -14   4  -1    0.46    0.28
  14  -4  -1    0.82    0.28
  -4 -14  -1    1.41    0.38
   4  14  -1    1.28    0.34
  -4 -14   1    0.64    0.33
 -14   4   1    1.21    0.33
   4  14   1    0.94    0.32
  14  -4   1    0.66    0.24
  -5 -14  -1   83.44    2.41
   5  14  -1   82.58    2.37
  14  -5  -1   83.63    2.32
 -14   5  -1   80.98    2.32
   5  14   1   81.86    2.36
  -5 -14   1   83.38    2.41
 -14   5   1   85.96    2.36
  14  -5   1   84.11    2.29
 -14   6  -1    7.39    0.59
  14  -6  -1    6.07    0.46
   6  14  -1    7.24    0.54
  -6 -14  -1    7.03    0.58
   6  14   1    7.34    0.60
 -14   6   1    5.84    0.47
  -6 -14   1    5.10    0.50
  14  -6   1    7.28    0.55
 -14   7  -1   87.84    2.44
  -7 -14  -1   85.81    2.54
   7  14  -1   86.87    2.48
  14  -7  -1   84.90    2.42
 -14   7   1   86.21    2.46
   7  14   1   89.47    2.47
  -7 -14   1   86.52    2.54
   8  14  -1    0.77    0.38
  14  -8  -1    0.67    0.33
 -14   8  -1    0.80    0.35
  -8 -14  -1    1.10    0.40
   8  14   1    0.58    0.32
 -14   8   1    0.85    0.36
  -8 -14   1    0.88    0.41
 -14   9  -1    1.38    0.38
  -9 -14  -1    1.51    0.48
   9  14  -1    1.95    0.41
  14  -9  -1    1.66    0.37
  -9 -14   1    1.89    0.48
   9  14   1    2.03    0.40
 -14   9   1    1.38    0.39
 -14  10  -1   38.11    1.35
  10  14  -1   37.45    1.37
 -10 -14  -1   38.37    1.47
  10  14   1   37.77    1.33
 -14  10   1   38.73    1.39
 -10 -14   1   39.81    1.47
  11  14  -1    3.06    0.48
 -14  11  -1    2.55    0.44
 -11 -14  -1    3.84    0.56
 -11 -14   1    3.41    0.56
 -14  11   1    2.41    0.47
  11  14   1    2.87    0.42
  12  14  -1    2.62    0.47
 -12 -14  -1    2.10    0.57
 -14  12  -1    2.66    0.49
 -14  12   1    2.33    0.48
 -12 -14   1    3.16    0.57
  12  14   1    2.40    0.44
  13  14  -1   12.98    0.88
 -14  13  -1   13.73    0.93
 -13 -14  -1   13.70    1.07
 -14  13   1   13.37    0.98
 -13 -14   1   13.86    1.05
  14  14  -1    8.93    0.71
 -14  14  -1    7.96    0.69
 -14 -14  -1    7.73    0.73
 -14 -14   1    8.68    0.80
 -14  14   1    8.63    0.73
 -14  15  -1    9.04    0.75
  15  14  -1    8.60    0.70
 -15 -14  -1    7.57    0.78
 -14  15   1    8.15    0.73
 -15 -14   1    9.62    0.84
 -13  15  -1   25.81    1.20
 -15 -13  -1   25.88    1.35
  15  13  -1   26.43    1.19
 -15 -13   1   26.05    1.33
 -13  15   1   25.01    1.19
  15  12  -1   51.91    1.75
 -12  15  -1   49.14    1.74
 -15 -12  -1   54.52    1.89
 -15 -12   1   55.14    1.92
 -12  15   1   52.31    1.78
 -11  15  -1   13.49    0.89
  15  11  -1   13.59    0.85
 -15 -11  -1   12.93    1.02
 -11  15   1   12.74    0.89
 -15 -11   1   11.94    1.00
 -15 -10  -1   10.77    0.90
  15  10  -1   10.00    0.77
 -10  15  -1    7.79    0.63
 -15 -10   1   10.02    0.75
 -10  15   1    7.16    0.60
 -15  -9  -1    0.78    0.44
   9 -15  -1    1.00    0.36
  15   9  -1    0.42    0.36
  -9  15  -1    0.39    0.40
 -15  -9   1    0.57    0.44
  -9  15   1    0.53    0.40
   8 -15  -1    8.57    0.69
  -8  15  -1    9.52    0.75
 -15  -8  -1   10.36    0.82
  15   8  -1    9.49    0.70
 -15  -8   1    8.68    0.66
  15   8   1   10.23    0.65
  -8  15   1    9.74    0.77
 -15  -7  -1    2.99    0.47
  15   7  -1    3.16    0.45
  -7  15  -1    3.76    0.47
   7 -15  -1    3.91    0.45
 -15  -7   1    3.96    0.53
  15   7   1    3.53    0.40
  -7  15   1    2.84    0.43
  -6  15  -1   16.83    0.85
 -15  -6  -1   16.43    0.88
   6 -15  -1   15.27    0.77
  15   6  -1   16.24    0.83
  -6  15   1   15.87    0.85
 -15  -6   1   15.99    0.88
  15   6   1   17.20    0.76
   6 -15   1   16.29    0.75
 -15  -5  -1    2.84    0.43
  15   5  -1    2.58    0.39
  -5  15  -1    2.00    0.39
   5 -15  -1    2.46    0.38
  15   5   1    2.11    0.34
   5 -15   1    2.75    0.36
 -15  -5   1    2.07    0.41
  -5  15   1    2.17    0.41
 -15  -4  -1   10.70    0.74
  15   4  -1   11.11    0.66
   4 -15  -1   11.47    0.68
  -4  15  -1   12.49    0.74
   4 -15   1   10.90    0.62
  15   4   1   12.28    0.65
  -4  15   1   11.59    0.72
 -15  -4   1   10.65    0.73
  15   3  -1   26.78    1.00
   3 -15  -1   27.58    1.02
 -15  -3  -1   28.47    1.06
  -3  15  -1   26.67    1.03
 -15  -3   1   27.30    1.06
   3 -15   1   27.19    0.98
  15   3   1   26.24    0.97
  -3  15   1   28.54    1.06
   2 -15  -1    3.28    0.40
 -15  -2  -1    3.55    0.41
  15   2  -1    3.51    0.38
  -2  15  -1    3.81    0.41
   2 -15   1    4.98    0.43
  -2  15   1    3.96    0.44
 -15  -2   1    4.65    0.47
  15   2   1    4.05    0.37
   1 -15  -1    2.26    0.36
  -1  15  -1    3.15    0.41
 -15  -1  -1    2.98    0.39
  15   1  -1    2.91    0.38
  15   1   1    3.48    0.35
  -1  15   1    3.14    0.41
   1 -15   1    2.68    0.36
 -15  -1   1    2.83    0.40
   0 -15  -1   11.60    0.70
  15   0  -1   10.54    0.63
   0  15  -1   11.96    0.70
 -15   0  -1   12.16    0.70
   0  15   1   10.70    0.69
  15   0   1   11.65    0.60
   0 -15   1   11.50    0.66
 -15   0   1   10.91    0.69
   1  15  -1   35.97    1.24
  -1 -15  -1   35.95    1.25
 -15   1  -1   35.00    1.21
  15  -1  -1   35.65    1.20
  15  -1   1   35.31    1.15
  -1 -15   1   36.42    1.24
 -15   1   1   36.53    1.24
   1  15   1   35.67    1.23
   2  15  -1   16.82    0.81
 -15   2  -1   17.67    0.79
  15  -2  -1   16.33    0.75
  -2 -15  -1   16.64    0.84
  15  -2   1   16.24    0.71
  -2 -15   1   17.10    0.81
 -15   2   1   16.88    0.81
   2  15   1   16.44    0.79
  15  -3  -1    9.22    0.58
 -15   3  -1    8.98    0.63
   3  15  -1    9.04    0.66
  -3 -15  -1    8.77    0.70
  15  -3   1    9.04    0.55
 -15   3   1    9.28    0.66
  -3 -15   1    8.71    0.69
   3  15   1    9.05    0.63
  -4 -15  -1   48.11    1.63
 -15   4  -1   50.00    1.54
   4  15  -1   49.11    1.58
  15  -4  -1   48.94    1.52
 -15   4   1   48.72    1.56
   4  15   1   51.39    1.58
  -4 -15   1   51.23    1.63
 -15   5  -1   31.71    1.15
  15  -5  -1   31.93    1.11
   5  15  -1   32.46    1.19
  -5 -15  -1   33.57    1.25
   5  15   1   32.88    1.17
  -5 -15   1   30.67    1.23
 -15   5   1   31.47    1.18
 -15   6  -1  154.55    4.06
  -6 -15  -1  149.36    4.15
   6  15  -1  152.21    4.10
  15  -6  -1  151.08    4.04
   6  15   1  157.18    4.10
 -15   6   1  151.57    4.07
  -6 -15   1  150.37    4.14
  15  -7  -1   42.61    1.40
 -15   7  -1   44.91    1.44
   7  15  -1   44.14    1.48
  -7 -15  -1   44.06    1.56
   7  15   1   46.16    1.48
  -7 -15   1   42.73    1.56
 -15   7   1   42.46    1.47
   8  15  -1   17.34    0.93
 -15   8  -1   18.68    0.92
  -8 -15  -1   19.50    1.03
  -8 -15   1   18.97    1.03
   8  15   1   21.20    0.94
 -15   8   1   18.56    0.94
 -15   9  -1    0.29    0.36
   9  15  -1   -0.11    0.37
  -9 -15  -1    0.85    0.47
 -15   9   1   -0.17    0.39
   9  15   1    0.17    0.35
  -9 -15   1   -0.10    0.44
 -15  10  -1   24.42    1.07
  10  15  -1   24.53    1.10
 -10 -15  -1   25.71    1.20
  10  15   1   22.18    1.02
 -10 -15   1   25.71    1.22
 -15  10   1   23.46    1.10
 -11 -15  -1    6.05    0.66
  11  15  -1    8.17    0.64
 -15  11  -1    7.54    0.61
  11  15   1    6.82    0.58
 -15  11   1    8.38    0.68
 -11 -15   1    8.22    0.75
  12  15  -1   12.27    0.90
 -12 -15  -1   10.81    0.82
 -15  12  -1   10.76    0.87
  12  15   1   11.26    0.83
 -12 -15   1   12.12    1.01
 -15  12   1   10.15    0.74
  13  15  -1    0.38    0.47
 -15  13  -1    0.52    0.48
 -13 -15  -1    0.54    0.53
 -15  13   1    0.47    0.52
 -13 -15   1    0.95    0.57
 -15  14  -1    4.11    0.58
  14  15  -1    4.01    0.57
 -14 -15  -1    4.62    0.67
 -14 -15   1    4.98    0.71
 -15  14   1    4.01    0.61
 -16 -13  -1    1.24    0.62
 -13  16  -1    1.37    0.50
 -16 -13   1    1.37    0.60
 -13  16   1    1.43    0.52
 -12  16  -1    3.23    0.56
 -16 -12  -1    4.23    0.67
 -12  16   1    2.38    0.51
 -16 -12   1    3.76    0.66
  16  11  -1    2.62    0.48
 -11  16  -1    4.05    0.57
 -16 -11  -1    3.23    0.60
 -11  16   1    3.31    0.56
 -16 -11   1    2.63    0.58
 -16 -10  -1    1.31    0.50
  16  10  -1    0.41    0.40
 -10  16  -1    0.67    0.45
 -10  16   1    0.24    0.41
 -16 -10   1    0.29    0.51
 -16  -9  -1    0.56    0.48
  -9  16  -1    0.48    0.42
  16   9  -1   -0.27    0.35
 -16  -9   1   -0.01    0.48
  -9  16   1    0.13    0.43
  -8  16  -1    9.87    0.80
   8 -16  -1    9.15    0.74
 -16  -8  -1    9.15    0.69
  16   8  -1    9.79    0.75
 -16  -8   1   11.00    0.77
  -8  16   1    9.17    0.68
 -16  -7  -1   10.35    0.86
  16   7  -1    9.62    0.73
   7 -16  -1   10.99    0.74
  -7  16  -1   10.13    0.78
  -7  16   1    7.87    0.62
 -16  -7   1   11.95    0.86
  -6  16  -1    2.04    0.43
   6 -16  -1    2.17    0.40
  16   6  -1    1.80    0.40
 -16  -6  -1    1.49    0.46
 -16  -6   1    1.54    0.44
  -6  16   1    2.26    0.43
  -5  16  -1    9.24    0.76
  16   5  -1    9.69    0.72
   5 -16  -1   10.28    0.69
 -16  -5  -1   10.72    0.79
  -5  16   1    9.37    0.76
 -16  -5   1    9.97    0.78
 -16  -4  -1   20.68    0.96
   4 -16  -1   20.00    0.91
  16   4  -1   19.95    0.88
  -4  16  -1   20.92    0.95
  -4  16   1   19.58    0.95
 -16  -4   1   19.50    0.95
   4 -16   1   19.49    0.85
 -16  -3  -1    9.17    0.72
   3 -16  -1    7.71    0.65
  -3  16  -1    8.32    0.68
  16   3  -1    8.63    0.62
   3 -16   1    7.35    0.60
  -3  16   1    7.73    0.58
 -16  -3   1    7.03    0.56
  -2  16  -1   12.76    0.77
  16   2  -1   12.66    0.70
 -16  -2  -1   12.85    0.78
   2 -16  -1   12.40    0.76
  -2  16   1   12.39    0.76
 -16  -2   1   12.15    0.78
   2 -16   1   11.19    0.69
 -16  -1  -1   63.98    1.94
   1 -16  -1   63.48    1.94
  16   1  -1   64.63    1.90
  -1  16  -1   64.04    1.94
  -1  16   1   62.87    1.93
   1 -16   1   67.32    1.92
 -16  -1   1   62.97    1.94
 -16   0  -1    2.35    0.40
   0  16  -1    2.36    0.41
   0 -16  -1    2.30    0.40
  16   0  -1    2.29    0.37
   0 -16   1    2.04    0.38
   0  16   1    2.82    0.44
 -16   0   1    2.65    0.42
  -1 -16  -1   15.39    0.83
  16  -1  -1   14.53    0.76
 -16   1  -1   15.11    0.80
   1  16  -1   13.73    0.80
 -16   1   1   14.59    0.82
  -1 -16   1   15.22    0.80
   1  16   1   14.88    0.80
  -2 -16  -1   10.86    0.77
 -16   2  -1   10.72    0.72
  16  -2  -1   10.55    0.65
   2  16  -1   10.40    0.73
 -16   2   1   11.03    0.74
   2  16   1   11.60    0.72
  -2 -16   1   10.16    0.72
   3  16  -1    7.30    0.56
  -3 -16  -1    7.57    0.59
 -16   3  -1    8.09    0.67
  16  -3  -1    7.48    0.61
   3  16   1    8.89    0.68
 -16   3   1    8.13    0.69
  -3 -16   1    7.80    0.60
  16  -4  -1    0.17    0.31
   4  16  -1    0.69    0.37
 -16   4  -1    0.66    0.35
  -4 -16  -1    0.40    0.43
 -16   4   1    0.10    0.34
  -4 -16   1    0.59    0.40
   4  16   1    0.33    0.35
   5  16  -1   39.38    1.40
  16  -5  -1   37.61    1.31
 -16   5  -1   40.69    1.35
  -5 -16  -1   39.69    1.46
  -5 -16   1   41.13    1.45
   5  16   1   40.24    1.38
 -16   5   1   37.38    1.37
   6  16  -1   39.63    1.40
 -16   6  -1   37.99    1.33
  -6 -16  -1   39.08    1.48
 -16   6   1   37.45    1.37
   6  16   1   38.47    1.36
  -6 -16   1   36.29    1.44
  -7 -16  -1   80.79    2.48
 -16   7  -1   80.81    2.36
   7  16  -1   81.19    2.41
  -7 -16   1   81.31    2.47
 -16   7   1   79.27    2.38
   7  16   1   82.24    2.39
  -8 -16  -1    6.23    0.64
 -16   8  -1    6.08    0.56
   8  16  -1    6.30    0.59
   8  16   1    6.44    0.59
 -16   8   1    5.62    0.58
  -8 -16   1    5.06    0.60
 -16   9  -1    3.35    0.51
   9  16  -1    2.13    0.48
  -9 -16  -1    2.52    0.53
 -16   9   1    2.19    0.49
  -9 -16   1    3.18    0.59
   9  16   1    3.27    0.51
 -16  10  -1    4.68    0.55
 -10 -16  -1    5.32    0.64
  10  16  -1    5.66    0.60
 -10 -16   1    5.05    0.63
  10  16   1    5.09    0.56
 -16  10   1    4.03    0.56
  11  16  -1   33.39    1.33
 -11 -16  -1   34.22    1.44
 -16  11  -1   31.17    1.29
  11  16   1   29.62    1.27
 -11 -16   1   32.73    1.43
 -16  11   1   32.39    1.34
 -12 -16  -1    0.73    0.55
  12  16  -1    0.15    0.46
 -16  12  -1   -0.19    0.45
 -12 -16   1    1.18    0.57
 -16  12   1   -0.06    0.50
 -13 -16  -1    0.85    0.58
  13  16  -1    1.62    0.51
 -16  13  -1    1.59    0.52
 -13 -16   1    2.60    0.62
 -16  13   1    1.40    0.56
 -12  17  -1    3.78    0.59
 -17 -12  -1    3.82    0.70
 -12  17   1    3.72    0.57
 -17 -12   1    4.87    0.71
 -11  17  -1    0.55    0.46
 -17 -11  -1    0.34    0.53
 -11  17   1    0.33    0.46
 -17 -11   1    1.07    0.58
 -17 -10  -1    0.80    0.54
 -10  17  -1   -0.34    0.43
 -17 -10   1    0.00    0.51
 -10  17   1    0.77    0.48
  -9  17  -1   10.78    0.90
 -17  -9  -1   12.13    0.99
 -17  -9   1    9.94    0.78
  -9  17   1   10.84    0.90
  17   8  -1    3.36    0.50
  -8  17  -1    1.72    0.47
 -17  -8  -1    1.93    0.53
  -8  17   1    3.38    0.53
 -17  -8   1    2.93    0.58
  -7  17  -1   38.30    1.45
 -17  -7  -1   39.67    1.51
  17   7  -1   39.22    1.41
 -17  -7   1   40.28    1.53
  -7  17   1   40.41    1.47
 -17  -6  -1    0.05    0.42
   6 -17  -1    0.43    0.39
  17   6  -1    1.01    0.38
  -6  17  -1   -0.23    0.40
  -6  17   1    0.11    0.43
 -17  -6   1    0.66    0.47
  -5  17  -1    7.28    0.61
  17   5  -1    7.88    0.61
 -17  -5  -1    8.33    0.66
   5 -17  -1    7.85    0.61
 -17  -5   1    7.60    0.64
  -5  17   1    7.04    0.60
 -17  -4  -1    3.08    0.48
   4 -17  -1    2.75    0.42
  17   4  -1    2.83    0.43
  -4  17  -1    2.85    0.47
 -17  -4   1    2.79    0.46
  -4  17   1    3.98    0.52
 -17  -3  -1    0.38    0.39
   3 -17  -1    0.77    0.39
  -3  17  -1    0.58    0.40
  17   3  -1    0.54    0.34
  -3  17   1   -0.17    0.40
 -17  -3   1    0.54    0.40
  17   2  -1   68.63    2.08
 -17  -2  -1   70.06    2.13
  -2  17  -1   71.33    2.13
   2 -17  -1   70.21    2.13
 -17  -2   1   72.59    2.15
   2 -17   1   69.23    2.09
  -2  17   1   70.65    2.14
   1 -17  -1   13.19    0.83
  -1  17  -1   13.08    0.81
 -17  -1  -1   13.34    0.81
  17   1  -1   12.45    0.77
 -17  -1   1   13.10    0.84
  -1  17   1   12.31    0.81
   1 -17   1   12.50    0.78
   0  17  -1   51.91    1.70
  17   0  -1   51.35    1.64
 -17   0  -1   52.74    1.68
   0 -17  -1   52.10    1.70
   0  17   1   53.68    1.71
   0 -17   1   51.46    1.67
 -17   0   1   52.00    1.70
  -1 -17  -1    2.68    0.47
  17  -1  -1    2.42    0.40
   1  17  -1    2.19    0.45
 -17   1  -1    2.76    0.44
 -17   1   1    3.38    0.48
  -1 -17   1    2.92    0.46
   1  17   1    3.00    0.47
 -17   2  -1    1.97    0.42
   2  17  -1    1.77    0.45
  -2 -17  -1    1.51    0.45
  17  -2  -1    1.86    0.40
  -2 -17   1    1.65    0.43
 -17   2   1    1.86    0.45
   2  17   1    1.66    0.41
 -17   3  -1   10.11    0.77
   3  17  -1   10.39    0.78
  -3 -17  -1    9.90    0.84
 -17   3   1   10.23    0.81
   3  17   1   11.04    0.78
  -3 -17   1    9.48    0.78
 -17   4  -1    0.28    0.37
   4  17  -1   -0.06    0.39
  -4 -17  -1   -0.15    0.41
  -4 -17   1    0.73    0.44
 -17   4   1    0.17    0.40
   4  17   1    0.59    0.38
  -5 -17  -1    8.37    0.69
 -17   5  -1    7.26    0.58
   5  17  -1    8.59    0.65
  -5 -17   1    8.72    0.71
 -17   5   1    8.00    0.63
   5  17   1    8.84    0.74
   6  17  -1   36.79    1.39
  -6 -17  -1   36.65    1.48
 -17   6  -1   35.54    1.35
  -6 -17   1   35.72    1.46
 -17   6   1   39.14    1.41
   6  17   1   38.29    1.37
   7  17  -1   21.02    1.09
 -17   7  -1   22.62    1.04
  -7 -17  -1   21.04    1.20
  -7 -17   1   22.13    1.19
 -17   7   1   22.36    1.09
   7  17   1   23.16    1.05
   8  17  -1    9.85    0.83
 -17   8  -1   10.38    0.84
  -8 -17  -1   10.96    0.83
   8  17   1    7.61    0.63
 -17   8   1    8.92    0.70
  -8 -17   1    8.82    0.78
 -17   9  -1    0.70    0.45
   9  17  -1    2.15    0.51
  -9 -17  -1    1.64    0.58
   9  17   1    1.29    0.46
 -17   9   1    0.65    0.46
  -9 -17   1    1.93    0.58
 -10 -17  -1   22.05    1.25
  10  17  -1   20.11    1.11
 -17  10  -1   21.19    1.07
  10  17   1   21.89    1.09
 -17  10   1   19.68    1.13
 -10 -17   1   23.42    1.23
  11  17  -1    4.11    0.60
 -11 -17  -1    5.05    0.69
 -17  11  -1    3.59    0.58
 -17  11   1    3.77    0.61
 -11 -17   1    3.83    0.65
 -12 -17  -1    3.34    0.68
 -17  12  -1    4.37    0.62
  12  17  -1    3.70    0.58
 -17  12   1    2.84    0.60
 -12 -17   1    2.76    0.63
 -18 -10  -1    6.78    0.73
 -10  18  -1    6.22    0.64
 -10  18   1    6.07    0.66
 -18 -10   1    5.72    0.72
  -9  18  -1   15.31    1.02
 -18  -9  -1   16.85    1.13
 -18  -9   1   15.36    1.09
  -9  18   1   16.52    1.06
  -8  18  -1   11.54    0.91
 -18  -8  -1    9.34    0.77
 -18  -8   1    9.57    0.80
  -8  18   1   11.55    0.94
  -7  18  -1    4.98    0.59
 -18  -7  -1    5.90    0.67
 -18  -7   1    3.97    0.60
  -7  18   1    6.56    0.66
  -6  18  -1    7.82    0.67
 -18  -6  -1   10.16    0.76
 -18  -6   1    8.70    0.72
  -6  18   1    9.26    0.71
  -5  18  -1    0.35    0.47
 -18  -5  -1    0.83    0.46
   5 -18  -1    0.61    0.42
 -18  -5   1    0.70    0.49
  -5  18   1    0.57    0.45
  -4  18  -1    0.17    0.43
   4 -18  -1   -0.28    0.39
 -18  -4  -1   -0.01    0.44
  -4  18   1   -0.15    0.43
 -18  -4   1    0.48    0.47
   3 -18  -1   45.28    1.57
 -18  -3  -1   45.84    1.60
  -3  18  -1   47.17    1.62
 -18  -3   1   47.27    1.63
  -3  18   1   45.43    1.62
  -2  18  -1   16.86    0.97
 -18  -2  -1   17.65    0.95
   2 -18  -1   17.20    0.94
 -18  -2   1   16.74    0.97
  -2  18   1   16.81    0.99
   1 -18  -1   94.50    2.78
  -1  18  -1   96.15    2.79
 -18  -1  -1   93.07    2.76
  -1  18   1   98.07    2.78
 -18  -1   1   97.16    2.80
 -18   0  -1    6.08    0.58
   0  18  -1    6.05    0.60
   0 -18  -1    5.91    0.60
 -18   0   1    5.01    0.57
   0  18   1    6.27    0.59
   0 -18   1    5.09    0.57
 -18   1  -1    2.75    0.49
   1  18  -1    3.00    0.51
  -1 -18  -1    1.97    0.46
 -18   1   1    2.72    0.52
  -1 -18   1    2.56    0.47
   1  18   1    2.29    0.48
 -18   2  -1   22.25    1.04
   2  18  -1   23.05    1.09
  -2 -18  -1   21.81    1.12
  -2 -18   1   22.34    1.08
 -18   2   1   21.46    1.09
   2  18   1   23.06    1.06
  -3 -18  -1   29.26    1.28
 -18   3  -1   28.81    1.20
   3  18  -1   27.63    1.20
   3  18   1   27.76    1.19
 -18   3   1   28.65    1.23
  -3 -18   1   28.01    1.25
   4  18  -1    6.15    0.60
 -18   4  -1    4.97    0.55
  -4 -18  -1    5.88    0.63
   4  18   1    6.76    0.61
 -18   4   1    5.54    0.58
  -4 -18   1    4.94    0.57
   5  18  -1    2.99    0.54
 -18   5  -1    2.41    0.47
  -5 -18  -1    2.57    0.56
 -18   5   1    3.16    0.54
   5  18   1    2.83    0.51
  -5 -18   1    2.69    0.56
  -6 -18  -1    0.92    0.53
 -18   6  -1    0.81    0.43
   6  18  -1    1.84    0.49
   6  18   1    1.49    0.47
 -18   6   1    0.29    0.45
  -6 -18   1    0.14    0.49
  -7 -18  -1    6.82    0.71
   7  18  -1    6.84    0.65
 -18   7  -1    5.25    0.58
   7  18   1    6.60    0.61
 -18   7   1    8.10    0.67
  -7 -18   1    6.56    0.70
 -18   8  -1    0.80    0.46
  -8 -18  -1   -0.15    0.54
   8  18  -1    0.64    0.50
  -8 -18   1    0.55    0.54
   8  18   1    0.55    0.45
 -18   8   1    0.02    0.48
   9  18  -1    1.20    0.52
 -18   9  -1    1.51    0.51
  -9 -18  -1    2.25    0.62
   9  18   1    1.39    0.48
 -18   9   1    0.61    0.52
  -9 -18   1    2.65    0.62
 -10 -18  -1    0.75    0.58
 -18  10  -1    0.14    0.49
  10  18  -1    0.64    0.47
 -18  10   1    0.04    0.51
  10  18   1    0.41    0.49
 -10 -18   1    0.69    0.58
 -19  -8  -1   45.38    1.71
  -8  19  -1   43.17    1.65
 -19  -8   1   45.34    1.74
  -8  19   1   42.90    1.67
 -19  -7  -1    2.00    0.57
  -7  19  -1    2.05    0.53
 -19  -7   1    1.97    0.58
  -7  19   1    2.79    0.57
  -6  19  -1    6.83    0.71
 -19  -6  -1    6.76    0.70
 -19  -6   1    6.38    0.70
  -6  19   1    6.99    0.68
 -19  -5  -1    1.00    0.50
  -5  19  -1    0.43    0.49
 -19  -5   1    1.08    0.52
  -5  19   1    0.33    0.49
  -4  19  -1    4.48    0.59
 -19  -4  -1    3.59    0.57
  -4  19   1    4.52    0.63
 -19  -4   1    4.40    0.59
 -19  -3  -1   13.57    0.94
  -3  19  -1   12.15    0.97
   3 -19  -1   12.75    0.89
  -3  19   1   12.39    0.97
 -19  -3   1   13.63    0.96
   2 -19  -1   58.11    1.92
 -19  -2  -1   59.01    1.94
  -2  19  -1   58.54    1.94
 -19  -2   1   58.47    1.96
  -2  19   1   59.39    1.96
   1 -19  -1   37.57    1.48
 -19  -1  -1   36.61    1.46
  -1  19  -1   38.70    1.48
 -19  -1   1   38.50    1.47
  -1  19   1   38.93    1.46
 -19   0  -1   41.06    1.54
   0  19  -1   42.17    1.56
   0 -19  -1   41.97    1.56
   0  19   1   43.01    1.54
 -19   0   1   41.66    1.57
 -19   1  -1    0.31    0.45
  -1 -19  -1    0.05    0.47
   1  19  -1    0.12    0.47
 -19   1   1   -0.16    0.45
   1  19   1    0.32    0.45
 -19   2  -1   13.64    0.93
  -2 -19  -1   13.20    0.98
   2  19  -1   13.56    0.99
   2  19   1   14.30    0.93
 -19   2   1   13.40    0.99
  -3 -19  -1    0.64    0.50
 -19   3  -1    1.00    0.48
   3  19  -1    1.27    0.51
   3  19   1    1.16    0.47
 -19   3   1    0.71    0.48
 -19   4  -1   37.75    1.46
  -4 -19  -1   39.89    1.58
   4  19  -1   36.82    1.49
   4  19   1   39.77    1.48
 -19   4   1   38.93    1.50
   5  19  -1    0.94    0.49
 -19   5  -1    0.27    0.46
  -5 -19  -1    0.59    0.53
   5  19   1    0.64    0.47
 -19   5   1    0.17    0.47
   6  19  -1    0.82    0.47
 -19   6  -1    1.35    0.50
  -6 -19  -1    1.05    0.55
  -6 -19   1    0.88    0.54
   6  19   1    1.05    0.49
 -19   6   1    0.60    0.48
 -19   7  -1    0.05    0.47
  -7 -19  -1    0.59    0.57
   7  19  -1    1.13    0.52
 -19   7   1    0.40    0.49
  -7 -19   1    0.27    0.54
   7  19   1    0.60    0.48
   8  19  -1    0.02    0.49
 -19   8  -1   -0.25    0.49
  -8 -19  -1   -0.06    0.59
 -19   8   1   -0.30    0.50
   8  19   1    0.36    0.46
  -8 -19   1   -0.05    0.55
 -20  -5  -1    1.05    0.57
  -5  20  -1    1.02    0.55
  -5  20   1    1.51    0.56
 -20  -5   1    1.20    0.56
 -20  -4  -1    1.17    0.52
  -4  20  -1    0.70    0.51
  -4  20   1    0.95    0.54
 -20  -4   1    0.48    0.51
 -20  -3  -1    2.45    0.57
  -3  20  -1    1.81    0.55
  -3  20   1    2.17    0.57
 -20  -3   1    1.61    0.55
 -20  -2  -1   13.49    1.01
  -2  20  -1   13.12    1.00
 -20  -2   1   13.05    1.01
  -2  20   1   13.36    1.02
 -20  -1  -1   22.48    1.18
  -1  20  -1   22.65    1.19
  -1  20   1   23.12    1.22
 -20  -1   1   21.85    1.19
   0 -20  -1    3.39    0.58
 -20   0  -1    3.54    0.59
   0  20  -1    4.18    0.61
 -20   0   1    2.48    0.56
   0  20   1    3.33    0.55
  -1 -20  -1   -0.07    0.49
 -20   1  -1   -0.33    0.46
   1  20  -1   -0.49    0.48
 -20   1   1   -0.36    0.50
   1  20   1    0.16    0.47
 -20   2  -1    0.36    0.49
   2  20  -1    0.08    0.49
  -2 -20  -1    0.35    0.48
 -20   2   1    0.29    0.51
   2  20   1   -0.28    0.47
  -3 -20  -1   11.44    0.87
   3  20  -1   10.82    0.82
 -20   3  -1   12.04    0.94
   3  20   1   12.00    0.94
 -20   3   1    9.61    0.77
  -4 -20  -1    1.77    0.59
 -20   4  -1    1.75    0.52
   4  20  -1    2.17    0.56
   4  20   1    1.33    0.51
 -20   4   1    1.48    0.55
   5  20  -1    5.59    0.67
  -5 -20  -1    4.90    0.72
 -20   5  -1    6.74    0.69
 -20   5   1    6.57    0.72
   5  20   1    5.59    0.66
   0   0  -2  411.57   10.29
   0   0  -2  407.66   11.10
   0   0   2  406.49   10.29
   0   0   2  428.51   10.28
   0   1  -2   64.04    1.60
   0   1  -2   64.58    1.61
   1   0  -2   65.24    1.61
   1   0  -2   62.00    1.61
   0  -1  -2   61.99    1.61
   0  -1  -2   63.68    1.61
   0  -1   2   65.68    1.60
  -1   0   2   63.39    1.61
   0   1   2   63.87    1.60
   0  -1   2   65.27    1.60
   0   1   2   64.55    1.60
   1   1  -2   43.69    1.11
  -1  -1  -2   43.90    1.10
   1  -1  -2   43.58    1.11
   1  -1  -2   42.64    1.11
  -1  -1  -2   43.14    1.10
   1   1  -2   44.14    1.12
   1   1   2   42.86    1.09
  -1   1   2   42.63    1.11
  -1  -1   2   44.14    1.10
   1   1   2   46.09    1.10
  -1  -1   2   42.56    1.11
  -2  -1  -2    0.22    0.06
  -2  -1  -2    0.25    0.06
   1  -2  -2    0.18    0.07
   1  -2  -2    0.07    0.07
  -1   2  -2    0.27    0.05
  -1   2  -2    0.19    0.05
   2   1  -2    0.27    0.08
   2   1  -2    0.04    0.07
   2   1   2    0.24    0.06
   2   1   2    0.31    0.05
   1  -2   2    0.31    0.06
  -1   2   2    0.25    0.07
   1  -2   2    0.28    0.05
  -1   2   2    0.26    0.08
  -2  -1   2    0.16    0.06
  -2  -1   2    0.19    0.08
  -2   0  -2    1.74    0.07
  -2   0  -2    1.59    0.07
   0  -2  -2    1.57    0.11
   2   0  -2    1.66    0.12
   0  -2  -2    1.75    0.11
   0   2  -2    1.67    0.10
   0   2  -2    1.81    0.10
   2   0  -2    2.32    0.13
  -2   0   2    1.60    0.10
   0  -2   2    1.51    0.09
   0   2   2    1.40    0.10
   0  -2   2    1.54    0.08
  -2   0   2    1.58    0.11
  -2   1  -2   31.41    0.79
  -2   1  -2   31.49    0.79
  -1  -2  -2   30.82    0.82
  -1  -2  -2   32.24    0.82
   2  -1  -2   30.40    0.83
   2  -1  -2   32.85    0.83
   1   2  -2   32.29    0.83
   1   2  -2   30.94    0.82
   1   2   2   31.65    0.82
  -1  -2   2   31.41    0.83
  -2   1   2   32.25    0.83
   1   2   2   28.91    0.82
  -2   1   2   33.09    0.83
   2   2  -2    8.10    0.30
  -2   2  -2    8.51    0.25
   2  -2  -2    8.26    0.29
   2   2  -2    8.76    0.29
   2  -2  -2    8.57    0.29
  -2   2  -2    8.59    0.25
  -2  -2  -2    8.63    0.27
  -2  -2  -2    8.58    0.28
   2  -2   2    8.74    0.24
   2  -2   2    8.89    0.24
   2   2   2    8.99    0.28
  -2  -2   2    8.67    0.30
   2   2   2    9.22    0.27
  -2  -2   2    8.57    0.28
   2  -3  -2    5.73    0.24
   3   2  -2    5.32    0.24
  -2   3  -2    5.95    0.21
  -3  -2  -2    6.28    0.23
   3   2  -2    6.58    0.26
  -3  -2  -2    5.72    0.24
   2  -3  -2    6.35    0.25
  -2   3  -2    6.32    0.21
  -3  -2   2    6.00    0.26
   3   2   2    6.23    0.22
  -2   3   2    6.36    0.25
   2  -3   2    6.33    0.20
  -1   3  -2   21.91    0.58
   3   1  -2   21.45    0.61
   1  -3  -2   21.75    0.61
  -3  -1  -2   21.34    0.58
   1  -3  -2   21.11    0.60
  -1   3  -2   21.44    0.58
   3   1  -2   21.54    0.62
  -3  -1  -2   20.79    0.59
  -3  -1   2   20.00    0.61
  -1   3   2   20.83    0.60
   3   1   2   21.63    0.58
   1  -3   2   21.75    0.58
   1  -3   2   21.73    0.57
   3   1   2   21.20    0.58
  -1   3   2   22.96    0.62
   3   0  -2    0.36    0.09
  -3   0  -2    0.27    0.05
   0  -3  -2    0.28    0.07
   3   0  -2    0.24    0.08
  -3   0  -2    0.30    0.06
   0   3  -2    0.34    0.07
   0   3  -2    0.28    0.07
   0  -3  -2    0.20    0.07
  -3   0   2    0.37    0.08
   3   0   2    0.44    0.05
   3   0   2    0.40    0.05
   0  -3   2    0.32    0.06
   0   3   2    0.28    0.08
  -3   0   2    0.25    0.07
   0   3   2    0.29    0.08
   0  -3   2    0.28    0.06
  -3   1  -2  507.21   12.83
   3  -1  -2  487.02   12.90
   3  -1  -2  537.76   13.01
  -3   1  -2  505.78   12.82
  -1  -3  -2  494.76   12.97
  -1  -3  -2  517.52   15.25
   1   3  -2  493.81   12.94
   1   3  -2  531.76   13.02
  -3   1   2  515.28   13.00
  -1  -3   2  526.42   12.99
   3  -1   2  515.59   12.78
   1   3   2  502.27   12.89
  -3   1   2  540.71   12.98
   3  -1   2  519.67   12.77
  -2  -3  -2   33.95    0.90
  -3   2  -2   32.91    0.87
   2   3  -2   35.86    0.92
   3  -2  -2   31.43    0.90
   2   3  -2   31.51    0.90
   3  -2  -2   35.56    0.91
  -3   2  -2   34.78    0.87
  -2  -3  -2   32.92    0.90
   2   3   2   33.79    0.89
   3  -2   2   34.07    0.86
  -3   2   2   33.59    0.90
  -2  -3   2   33.12    0.92
   3  -2   2   34.54    0.86
   3   3  -2   20.56    0.61
  -3  -3  -2   20.23    0.60
  -3   3  -2   20.38    0.57
   3  -3  -2   21.74    0.60
   3  -3  -2   20.80    0.60
  -3   3  -2   21.69    0.57
   3   3  -2   21.28    0.62
  -3  -3  -2   21.32    0.60
  -3  -3   2   20.44    0.62
  -3   3   2   20.66    0.60
   3  -3   2   21.77    0.56
   3   3   2   20.54    0.58
  -3   4  -2    9.39    0.29
  -3   4  -2    8.73    0.30
   4   3  -2    8.59    0.33
  -4  -3  -2    8.93    0.32
   4   3  -2    9.09    0.36
   3  -4  -2    8.26    0.32
  -4  -3  -2    8.77    0.33
   3  -4   2    8.68    0.28
   4   3   2    9.06    0.31
  -4  -3   2    8.76    0.35
  -3   4   2    8.26    0.32
  -2   4  -2  393.24   10.14
   2  -4  -2  404.68   10.29
   2  -4  -2  410.02   10.11
  -4  -2  -2  380.03   10.12
   4   2  -2  380.81   10.12
   4   2  -2  406.93   10.17
  -2   4  -2  421.58   10.17
  -4  -2  -2  413.25   10.19
   2  -4   2  403.27   10.09
  -4  -2   2  392.22   10.31
  -2   4   2  412.03   10.24
   4   2   2  406.62   10.17
  -1   4  -2   16.41    0.49
   1  -4  -2   16.58    0.51
   4   1  -2   17.07    0.52
  -4  -1  -2   16.70    0.49
  -4  -1  -2   17.41    0.49
   1  -4  -2   18.07    0.51
   4   1  -2   18.33    0.53
  -1   4  -2   18.03    0.49
   1  -4   2   17.87    0.48
   4   1   2   17.75    0.48
  -1   4   2   16.36    0.51
   4   0  -2  132.44    3.42
  -4   0  -2  135.47    3.39
   0  -4  -2  135.82    3.42
   0   4  -2  131.11    3.41
   4   0  -2  139.46    3.43
  -4   0  -2  141.27    3.40
   0  -4  -2  139.68    3.42
   0   4  -2  137.11    3.41
   4   0   2  138.27    3.39
   0   4   2  139.35    3.42
   0  -4   2  138.68    3.40
  -4   0   2  120.76    3.42
   4  -1  -2   93.07    2.40
  -1  -4  -2   97.10    2.40
   1   4  -2   98.89    2.40
  -1  -4  -2   89.51    2.40
  -4   1  -2   95.23    2.37
   4  -1  -2   96.31    2.40
   1   4  -2   92.56    2.40
  -4   1  -2   92.04    2.37
  -1  -4   2   94.23    2.40
   1   4   2   92.81    2.39
   4  -1   2   94.36    2.36
  -2  -4  -2    0.19    0.10
  -4   2  -2    0.12    0.06
  -4   2  -2    0.05    0.06
  -2  -4  -2    0.11    0.08
   2   4  -2    0.10    0.09
   2   4  -2    0.26    0.10
   4  -2  -2    0.17    0.09
   4  -2  -2    0.09    0.09
   4  -2   2    0.26    0.06
  -2  -4   2    0.12    0.10
  -4   3  -2   59.40    1.46
   3   4  -2   58.01    1.51
  -3  -4  -2   55.41    1.51
  -4   3  -2   56.66    1.46
   3   4  -2   59.23    1.52
  -3  -4  -2   57.93    1.50
   3   4   2   54.37    1.48
  -4   3   2   57.06    1.50
   4  -3   2   57.81    1.45
  -3  -4   2   54.51    1.52
  -4   4  -2   72.09    1.87
   4   4  -2   67.81    1.90
  -4   4  -2   75.96    1.87
  -4  -4  -2   75.92    1.90
  -4  -4  -2   70.89    1.91
   4  -4  -2   71.74    1.90
   4   4  -2   73.65    1.93
  -4   4   2   74.61    1.90
   4   4   2   73.58    1.88
  -4  -4   2   70.10    1.92
   4  -4   2   74.60    1.86
  -4   5  -2    1.85    0.14
  -5  -4  -2    2.20    0.18
   5   4  -2    1.18    0.15
  -4   5  -2    2.01    0.15
   4  -5  -2    1.22    0.14
  -5  -4  -2    1.39    0.18
  -4   5   2    1.83    0.18
   5   4   2    1.32    0.13
  -5  -4   2    1.45    0.18
   4  -5   2    1.68    0.14
   5   3  -2  267.88    6.79
  -3   5  -2  283.20    6.76
  -5  -3  -2  271.23    6.90
  -5  -3  -2  285.74    6.78
  -3   5  -2  267.42    6.76
   5   3   2  271.46    6.84
   3  -5   2  267.18    6.84
  -3   5   2  266.96    6.88
  -5  -3   2  258.42    6.80
  -2   5  -2   20.61    0.61
  -5  -2  -2   20.96    0.62
   5   2  -2   21.35    0.64
  -5  -2  -2   20.85    0.63
   2  -5  -2   21.14    0.63
  -2   5  -2   21.56    0.61
  -2   5   2   21.92    0.64
   5   2   2   21.70    0.61
  -5  -2   2   21.11    0.65
   2  -5   2   21.41    0.60
   1  -5  -2  177.10    4.60
  -5  -1  -2  179.56    4.59
   1  -5  -2  192.03    4.61
  -1   5  -2  188.98    4.59
  -1   5  -2  178.50    4.59
   5   1  -2  185.80    4.61
  -5  -1  -2  191.10    4.59
   1  -5   2  180.19    4.58
  -5  -1   2  179.20    4.61
  -1   5   2  181.68    4.60
   5   1   2  180.70    4.58
   0  -5  -2   26.76    0.77
   0  -5  -2   28.21    0.77
  -5   0  -2   26.82    0.74
   0   5  -2   28.64    0.76
   0   5  -2   26.46    0.76
  -5   0  -2   27.53    0.74
   5   0  -2   26.25    0.77
  -5   0   2   27.14    0.78
   0  -5   2   28.09    0.75
   5   0   2   28.18    0.74
   0   5   2   26.36    0.77
  -1  -5  -2   82.64    2.05
   5  -1  -2   77.75    2.04
   1   5  -2   75.00    2.04
   1   5  -2   83.39    2.05
  -5   1  -2   79.46    2.01
  -5   1  -2   79.23    2.01
  -1  -5  -2   78.32    2.05
  -1  -5   2   78.66    2.04
  -5   1   2   79.40    2.05
   1   5   2   76.93    2.03
   5  -1   2   79.46    2.00
   5  -2  -2   86.74    2.26
  -2  -5  -2   83.94    2.26
  -5   2  -2   86.97    2.23
  -2  -5  -2   91.32    2.26
   2   5  -2   93.49    2.28
   2   5  -2   87.47    2.26
  -5   2  -2   88.78    2.23
  -5   2   2   88.22    2.26
   2   5   2   84.39    2.25
   5  -2   2   86.00    2.22
  -2  -5   2   88.43    2.27
   3   5  -2   40.33    1.09
   3   5  -2   40.43    1.10
  -5   3  -2   38.94    1.04
  -3  -5  -2   40.68    1.08
  -5   3  -2   39.55    1.04
   5  -3  -2   38.66    1.07
  -3  -5  -2   38.28    1.09
  -5   3   2   37.29    1.07
   3   5   2   37.98    1.07
   5  -3   2   40.17    1.03
  -3  -5   2   39.43    1.10
  -5   4  -2    0.09    0.10
   5  -4  -2   -0.04    0.11
   4   5  -2   -0.13    0.12
  -4  -5  -2    0.00    0.14
  -5   4  -2    0.01    0.09
  -4  -5  -2    0.14    0.13
   4   5   2    0.20    0.12
  -5   4   2    0.01    0.12
  -4  -5   2    0.06    0.15
   5  -4   2   -0.02    0.08
   5   5  -2    3.51    0.28
  -5   5  -2    4.37    0.24
   5  -5  -2    4.26    0.27
  -5   5  -2    4.25    0.22
  -5  -5  -2    3.91    0.30
  -5  -5  -2    4.13    0.28
   5  -5   2    4.13    0.21
   5   5   2    4.10    0.25
  -5   5   2    4.19    0.28
  -5  -5   2    4.03    0.31
  -6  -5  -2    7.11    0.38
   5  -6  -2    7.12    0.35
   6   5  -2    7.13    0.37
  -5   6  -2    7.09    0.33
  -6  -5  -2    7.32    0.35
  -5   6  -2    7.78    0.31
  -6  -5   2    7.41    0.39
   6   5   2    7.18    0.33
  -5   6   2    7.08    0.36
   5  -6   2    6.99    0.28
  -4   6  -2  207.30    5.31
   4  -6  -2  211.79    5.34
  -6  -4  -2  223.51    5.35
  -6  -4  -2  206.78    5.35
  -4   6  -2  222.10    5.32
   6   4  -2  214.14    5.35
   4  -6   2  212.06    5.30
   6   4   2  209.24    5.32
  -6  -4   2  205.09    5.37
  -4   6   2  204.33    5.33
  -6  -3  -2   84.85    2.10
   3  -6  -2   77.64    2.09
  -3   6  -2   79.67    2.07
  -6  -3  -2   78.14    2.10
  -3   6  -2   85.93    2.08
   6   3  -2   78.64    2.10
   3  -6   2   81.83    2.06
   6   3   2   78.91    2.07
  -6  -3   2   77.71    2.12
  -3   6   2   78.58    2.09
  -2   6  -2  424.90   10.28
  -6  -2  -2  420.96   10.45
  -6  -2  -2  417.68   10.99
  -2   6  -2  410.03   10.35
   2  -6  -2  395.74   10.42
   6   2  -2  414.82   10.47
  -2   6   2  419.02   10.45
   2  -6   2  417.90   10.44
   6   2   2  401.05   10.26
  -6  -2   2  391.14   10.36
  -1   6  -2    0.72    0.11
  -1   6  -2    0.86    0.13
   1  -6  -2    0.84    0.15
  -6  -1  -2    0.75    0.12
  -6  -1  -2    0.95    0.12
   6   1  -2    0.83    0.14
   1  -6   2    0.86    0.11
  -1   6   2    0.90    0.15
  -6  -1   2    0.76    0.14
   6   1   2    0.83    0.11
   0   6  -2  160.29    3.77
   6   0  -2  147.89    3.77
  -6   0  -2  144.17    3.74
  -6   0  -2  156.12    3.75
   0  -6  -2  141.65    3.77
   0   6  -2  145.83    3.76
  -6   0   2  150.13    3.78
   0   6   2  141.96    3.76
   0  -6   2  150.11    3.76
   6   0   2  147.94    3.74
  -6   1  -2   -0.03    0.10
   1   6  -2    0.07    0.12
  -1  -6  -2   -0.05    0.13
   6  -1  -2    0.13    0.12
   1   6  -2    0.15    0.11
  -6   1  -2    0.06    0.09
   1   6   2   -0.03    0.12
  -6   1   2   -0.03    0.12
  -1  -6   2    0.03    0.11
   6  -1   2   -0.16    0.08
   2   6  -2   57.33    1.55
  -6   2  -2   58.17    1.51
   6  -2  -2   58.78    1.55
   2   6  -2   60.34    1.56
  -2  -6  -2   61.16    1.56
  -6   2  -2   56.48    1.51
  -2  -6  -2   58.52    1.56
  -6   2   2   57.74    1.55
   2   6   2   56.91    1.54
   6  -2   2   58.70    1.50
  -2  -6   2   54.78    1.55
  -3  -6  -2   15.89    0.55
  -3  -6  -2   17.48    0.54
   3   6  -2   15.88    0.54
   3   6  -2   17.66    0.60
  -6   3  -2   16.09    0.49
  -6   3  -2   15.75    0.49
   6  -3  -2   15.61    0.53
  -3  -6   2   16.25    0.56
  -6   3   2   14.40    0.52
   6  -3   2   15.57    0.47
   3   6   2   15.74    0.52
  -4  -6  -2   33.13    1.01
   4   6  -2   34.18    1.00
   6  -4  -2   34.56    0.99
  -6   4  -2   35.40    0.96
  -6   4  -2   36.19    0.96
  -4  -6   2   33.07    1.02
   6  -4   2   36.00    0.94
   4   6   2   35.29    0.99
  -6   4   2   34.92    1.00
  -6   5  -2    0.20    0.12
  -5  -6  -2    0.25    0.18
   5   6  -2    0.21    0.16
  -6   5  -2    0.26    0.11
   6  -5  -2    0.33    0.14
   6  -5   2    0.24    0.10
  -6   5   2    0.19    0.15
  -5  -6   2    0.51    0.17
   5   6   2    0.27    0.14
  -6   6  -2    0.24    0.12
  -6  -6  -2    0.17    0.17
   6   6  -2    0.12    0.16
  -6   6  -2    0.15    0.14
   6  -6  -2    0.20    0.14
  -6   6   2    0.19    0.15
  -6  -6   2    0.20    0.18
   6  -6   2    0.11    0.11
   6   6   2    0.18    0.12
  -7  -6  -2   85.34    2.28
  -6   7  -2   84.58    2.22
   7   6  -2   81.29    2.26
   6  -7  -2   86.65    2.25
  -6   7  -2   89.96    2.23
  -6   7   2   82.24    2.25
   6  -7   2   85.29    2.20
  -7  -6   2   84.63    2.30
   7   6   2   82.22    2.23
   5  -7  -2   39.69    1.16
  -5   7  -2   42.86    1.14
  -5   7  -2   40.47    1.14
  -7  -5  -2   41.51    1.19
   7   5  -2   40.63    1.18
   7   5   2   41.06    1.15
  -5   7   2   40.53    1.17
  -7  -5   2   39.99    1.20
   5  -7   2   40.52    1.11
   4  -7  -2    3.22    0.24
  -7  -4  -2    3.31    0.26
  -4   7  -2    2.98    0.22
   7   4  -2    3.37    0.26
  -4   7  -2    3.51    0.24
  -7  -4  -2    3.37    0.26
  -7  -4   2    2.51    0.25
   4  -7   2    2.98    0.21
   7   4   2    2.97    0.22
  -4   7   2    3.18    0.25
  -3   7  -2  131.05    3.24
  -7  -3  -2  123.10    3.26
   3  -7  -2  126.08    3.26
  -3   7  -2  125.80    3.24
   7   3  -2  125.68    3.27
  -7  -3  -2  131.43    3.26
   3  -7   2  127.84    3.22
   7   3   2  127.63    3.24
  -7  -3   2  125.27    3.28
  -3   7   2  124.15    3.26
  -2   7  -2   35.13    0.98
  -2   7  -2   35.54    0.97
  -7  -2  -2   36.27    0.98
   2  -7  -2   34.54    0.99
  -7  -2  -2   34.12    0.98
   7   2  -2   34.54    1.00
  -2   7   2   34.11    0.99
  -7  -2   2   33.58    1.01
   2  -7   2   34.74    0.96
   7   2   2   33.37    0.96
  -1   7  -2   51.31    1.41
  -7  -1  -2   55.15    1.41
  -7  -1  -2   52.51    1.41
  -1   7  -2   52.99    1.41
   1  -7  -2   51.62    1.43
  -7  -1   2   51.72    1.43
  -1   7   2   51.29    1.42
   1  -7   2   51.89    1.39
   7   1   2   53.58    1.39
   7   0  -2   14.83    0.51
   0   7  -2   14.24    0.50
   0  -7  -2   14.52    0.52
  -7   0  -2   14.39    0.48
  -7   0  -2   15.85    0.48
   0   7  -2   15.79    0.50
   0  -7   2   14.08    0.49
   7   0   2   14.21    0.46
  -7   0   2   15.02    0.52
   0   7   2   14.72    0.51
  -7   1  -2   55.82    1.49
   1   7  -2   55.15    1.52
   7  -1  -2   57.90    1.52
  -1  -7  -2   54.94    1.53
  -7   1  -2   59.73    1.49
   1   7  -2   57.61    1.53
  -7   1   2   56.46    1.53
   1   7   2   55.34    1.52
  -1  -7   2   53.11    1.51
   7  -1   2   58.24    1.48
  -2  -7  -2   54.96    1.53
   2   7  -2   63.25    1.59
   7  -2  -2   56.83    1.52
  -7   2  -2   54.89    1.49
   2   7  -2   54.48    1.52
  -7   2  -2   57.25    1.49
   2   7   2   54.77    1.52
   7  -2   2   56.44    1.48
  -2  -7   2   55.41    1.53
  -7   3  -2  100.05    2.60
  -3  -7  -2  100.65    2.65
   7  -3  -2  101.63    2.63
   3   7  -2  102.52    2.65
  -7   3  -2  104.60    2.60
  -3  -7   2  101.65    2.66
  -7   3   2  101.10    2.64
   7  -3   2  101.80    2.59
   3   7   2   98.72    2.63
  -4  -7  -2   96.42    2.53
   4   7  -2   93.27    2.51
  -7   4  -2   96.85    2.47
   7  -4  -2   97.44    2.50
  -7   4  -2   98.31    2.47
  -4  -7   2   92.80    2.53
   4   7   2   95.74    2.50
  -7   4   2   93.03    2.50
   7  -4   2   98.39    2.45
  -5  -7  -2   25.18    0.84
   7  -5  -2   26.41    0.81
  -7   5  -2   25.32    0.77
   5   7  -2   26.14    0.82
  -7   5  -2   27.19    0.76
   7  -5   2   26.02    0.74
  -7   5   2   24.69    0.80
  -5  -7   2   25.45    0.85
   5   7   2   25.64    0.79
  -6  -7  -2   26.54    0.89
   6   7  -2   26.64    0.86
  -7   6  -2   29.28    0.81
  -7   6  -2   26.72    0.82
   7  -6  -2   27.48    0.84
  -6  -7   2   24.47    0.89
  -7   6   2   27.13    0.85
   7  -6   2   27.62    0.79
   6   7   2   27.60    0.84
  -7   7  -2   10.84    0.47
  -7  -7  -2   11.87    0.55
  -7   7  -2   12.13    0.45
   7   7  -2   10.09    0.51
   7  -7  -2   11.27    0.49
   7  -7   2   11.54    0.43
  -7  -7   2   11.50    0.56
   7   7   2   11.33    0.47
  -8  -7  -2   71.63    2.03
  -7   8  -2   72.10    1.96
   7  -8  -2   71.42    1.98
   8   7  -2   69.31    2.00
  -7   8  -2   76.65    1.97
  -8  -7   2   70.48    2.04
  -7   8   2   74.92    2.00
   7  -8   2   76.43    1.94
   8   7   2   73.60    1.98
  -6   8  -2    7.33    0.39
   8   6  -2    7.39    0.44
  -6   8  -2    8.36    0.37
   6  -8  -2    7.62    0.41
  -8  -6  -2    7.00    0.46
  -6   8   2    7.58    0.43
   6  -8   2    6.95    0.33
  -8  -6   2    7.75    0.47
   8   6   2    7.64    0.39
  -5   8  -2   18.15    0.63
  -5   8  -2   21.37    0.63
  -8  -5  -2   18.60    0.68
   8   5  -2   18.33    0.67
   5  -8  -2   18.78    0.66
   8   5   2   18.63    0.63
   5  -8   2   18.04    0.59
  -8  -5   2   18.76    0.70
  -5   8   2   18.63    0.66
  -8  -4  -2    4.49    0.34
  -8  -4  -2    5.19    0.32
  -4   8  -2    4.79    0.29
   4  -8  -2    4.55    0.33
  -4   8  -2    4.42    0.31
   8   4  -2    4.23    0.34
  -4   8   2    4.90    0.35
   8   4   2    4.76    0.29
  -8  -4   2    4.61    0.37
   4  -8   2    4.97    0.27
  -8  -3  -2    0.14    0.13
   3  -8  -2    0.09    0.15
  -8  -3  -2    0.24    0.16
   8   3  -2    0.20    0.18
  -3   8  -2    0.16    0.15
  -3   8  -2    0.12    0.12
  -3   8   2    0.05    0.15
   8   3   2    0.04    0.12
  -8  -3   2    0.09    0.16
   3  -8   2    0.06    0.11
  -2   8  -2   23.21    0.73
  -8  -2  -2   25.00    0.73
   2  -8  -2   22.62    0.74
   8   2  -2   23.28    0.75
  -8  -2  -2   23.05    0.73
  -2   8  -2   24.48    0.72
  -8  -2   2   24.01    0.76
   2  -8   2   22.88    0.70
   8   2   2   23.35    0.71
  -2   8   2   23.86    0.75
  -8  -1  -2    9.42    0.40
  -8  -1  -2   10.61    0.40
  -1   8  -2    9.62    0.42
   1  -8  -2   10.06    0.43
  -1   8  -2   10.43    0.40
  -1   8   2    9.81    0.42
   1  -8   2    9.65    0.38
   8   1   2    9.88    0.38
   0   8  -2    0.30    0.15
   0   8  -2    0.62    0.15
  -8   0  -2    0.48    0.13
   0  -8  -2    0.12    0.15
  -8   0  -2    0.39    0.13
   8   0  -2    0.42    0.15
   0  -8   2    0.45    0.15
  -8   0   2    0.14    0.14
   0   8   2    0.23    0.14
   8   0   2    0.38    0.12
  -8   1  -2   13.41    0.45
   1   8  -2   13.13    0.49
   8  -1  -2   12.38    0.49
  -1  -8  -2   13.51    0.52
  -8   1  -2   12.27    0.45
   8  -1   2   13.30    0.44
   1   8   2   13.14    0.48
  -1  -8   2   13.21    0.48
  -8   2  -2   10.96    0.39
  -8   2  -2   10.29    0.40
   8  -2  -2   11.14    0.44
  -2  -8  -2   10.26    0.46
   2   8  -2    9.98    0.44
   2   8   2   10.18    0.43
  -2  -8   2   10.47    0.44
  -8   2   2    9.41    0.43
   8  -2   2   10.04    0.37
   8  -3  -2   60.34    1.61
   3   8  -2   55.99    1.62
  -8   3  -2   56.48    1.57
  -3  -8  -2   57.56    1.63
  -8   3  -2   62.31    1.58
   8  -3   2   58.68    1.56
  -8   3   2   60.48    1.62
   3   8   2   59.63    1.61
  -3  -8   2   61.17    1.64
  -8   4  -2   16.96    0.53
  -4  -8  -2   15.83    0.61
   4   8  -2   15.74    0.60
  -8   4  -2   16.10    0.54
   8  -4  -2   16.21    0.58
   8  -4   2   16.25    0.52
  -8   4   2   15.83    0.58
   4   8   2   15.23    0.57
  -4  -8   2   16.00    0.62
  -8   5  -2   45.89    1.19
   8  -5  -2   42.73    1.22
  -5  -8  -2   42.31    1.26
  -8   5  -2   41.44    1.19
   5   8  -2   41.83    1.24
   5   8   2   42.78    1.22
  -8   5   2   42.30    1.23
  -5  -8   2   41.36    1.27
   8  -5   2   42.63    1.17
  -8   6  -2   32.02    0.97
   6   8  -2   32.37    1.03
  -8   6  -2   35.34    0.97
   8  -6  -2   31.59    1.00
  -6  -8  -2   32.70    1.05
   8  -6   2   33.64    0.94
   6   8   2   32.00    0.99
  -6  -8   2   32.60    1.06
  -8   6   2   33.70    1.02
   8  -7  -2   18.79    0.68
  -8   7  -2   20.32    0.63
   7   8  -2   18.04    0.70
  -7  -8  -2   17.67    0.72
  -8   7  -2   17.48    0.64
  -8   7   2   17.90    0.68
   7   8   2   18.76    0.66
  -7  -8   2   17.51    0.73
   8  -7   2   18.17    0.60
   8  -8  -2   84.75    2.32
   8   8  -2   82.44    2.34
  -8  -8  -2   86.61    2.37
  -8   8  -2   91.56    2.30
  -8   8  -2   84.20    2.29
   8  -8   2   87.85    2.27
  -8   8   2   85.16    2.33
  -8  -8   2   82.13    2.37
   8   8   2   88.48    2.32
   8  -9  -2    7.92    0.48
  -9  -8  -2    8.29    0.57
  -8   9  -2    8.37    0.49
   9   8  -2    8.45    0.53
   9   8   2    8.18    0.47
  -8   9   2    7.93    0.51
   8  -9   2    8.37    0.42
  -9  -8   2    8.24    0.57
   9   7  -2    0.95    0.26
  -7   9  -2    0.83    0.21
  -9  -7  -2    0.69    0.26
   7  -9  -2    0.84    0.23
  -9  -7   2    1.23    0.28
   7  -9   2    0.96    0.17
   9   7   2    0.88    0.20
  -7   9   2    1.03    0.26
   6  -9  -2   17.48    0.66
  -6   9  -2   16.82    0.64
   9   6  -2   17.72    0.69
  -6   9  -2   19.07    0.63
  -9  -6  -2   17.03    0.70
  -6   9   2   17.05    0.67
  -9  -6   2   16.68    0.70
   9   6   2   17.21    0.63
   6  -9   2   18.59    0.60
  -5   9  -2  139.65    3.58
   9   5  -2  138.83    3.61
   5  -9  -2  136.47    3.59
  -5   9  -2  149.35    3.58
  -9  -5  -2  138.10    3.62
  -9  -5   2  132.05    3.63
  -5   9   2  138.89    3.60
   5  -9   2  136.06    3.55
   9   5   2  137.79    3.57
  -9  -4  -2   23.40    0.79
  -4   9  -2   25.24    0.75
   9   4  -2   22.42    0.78
  -4   9  -2   23.12    0.76
   4  -9  -2   23.50    0.77
  -4   9   2   22.83    0.78
  -9  -4   2   23.06    0.81
   9   4   2   23.98    0.74
   4  -9   2   23.45    0.73
   9   3  -2   83.33    2.30
  -3   9  -2   91.15    2.28
  -3   9  -2   85.31    2.28
  -9  -3  -2   85.79    2.29
   3  -9  -2   84.15    2.29
  -9  -3  -2   92.57    2.30
  -3   9   2   82.96    2.29
  -9  -3   2   83.18    2.31
   3  -9   2   85.82    2.26
   9   3   2   87.22    2.27
   2  -9  -2   24.61    0.78
  -9  -2  -2   23.00    0.76
   9   2  -2   24.10    0.78
  -9  -2  -2   25.69    0.76
  -2   9  -2   23.23    0.76
  -2   9  -2   25.66    0.79
   2  -9   2   24.14    0.74
   9   2   2   23.77    0.74
  -9  -2   2   23.49    0.79
  -2   9   2   22.76    0.77
   9   1  -2   75.49    2.04
  -9  -1  -2   75.56    2.02
  -9  -1  -2   83.59    2.03
   1  -9  -2   74.42    2.04
  -1   9  -2   72.90    2.03
  -1   9   2   76.18    2.04
   9   1   2   76.31    2.00
   1  -9   2   76.66    2.01
  -9  -1   2   73.60    2.05
   9   0  -2   63.55    1.69
  -9   0  -2   66.51    1.67
   0   9  -2   58.51    1.68
  -9   0  -2   58.86    1.65
   0  -9  -2   61.06    1.69
   0   9   2   61.12    1.68
   9   0   2   62.03    1.64
   0  -9   2   61.95    1.67
  -9   0   2   60.66    1.69
  -9   1  -2    0.08    0.13
  -9   1  -2    0.39    0.14
  -1  -9  -2    0.56    0.20
   1   9  -2    0.18    0.15
   9  -1  -2    0.25    0.17
   1   9   2    0.19    0.15
   9  -1   2    0.34    0.13
  -9   1   2    0.18    0.16
  -1  -9   2    0.18    0.15
  -9   2  -2   56.09    1.45
  -2  -9  -2   51.96    1.50
   9  -2  -2   52.59    1.47
  -9   2  -2   50.98    1.44
   2   9  -2   52.50    1.49
  -9   2   2   52.59    1.48
  -2  -9   2   52.48    1.49
   9  -2   2   53.24    1.42
   2   9   2   54.51    1.48
   3   9  -2    1.63    0.22
  -9   3  -2    2.50    0.22
   9  -3  -2    1.68    0.22
  -9   3  -2    1.79    0.18
  -3  -9  -2    1.71    0.24
   3   9   2    2.11    0.23
  -9   3   2    2.52    0.25
  -3  -9   2    1.90    0.23
   9  -3   2    2.25    0.19
   9  -4  -2   35.82    1.06
  -9   4  -2   37.43    1.02
  -9   4  -2   35.23    1.03
  -4  -9  -2   34.61    1.10
   4   9  -2   35.33    1.08
  -9   4   2   35.76    1.07
  -4  -9   2   36.02    1.10
   9  -4   2   36.18    1.00
   4   9   2   33.99    1.06
   5   9  -2    0.90    0.21
  -9   5  -2    0.36    0.15
  -5  -9  -2    0.14    0.21
  -9   5  -2    0.20    0.16
   9  -5  -2    0.32    0.19
   5   9   2    0.44    0.19
  -9   5   2    0.12    0.19
  -5  -9   2    0.16    0.23
   9  -5   2    0.23    0.13
  -9   6  -2    4.36    0.30
  -9   6  -2    3.12    0.26
   6   9  -2    4.22    0.33
   9  -6  -2    3.18    0.28
   6   9   2    4.14    0.31
  -6  -9   2    3.29    0.33
   9  -6   2    4.04    0.29
  -9   6   2    4.13    0.33
   9  -7  -2   95.96    2.55
   7   9  -2   92.18    2.57
  -7  -9  -2   92.82    2.59
  -9   7  -2  100.67    2.52
  -9   7  -2   92.75    2.52
  -7  -9   2   93.29    2.61
   9  -7   2   97.20    2.49
  -9   7   2   95.36    2.56
   7   9   2   96.25    2.55
   9  -8  -2    1.65    0.27
  -8  -9  -2    1.50    0.32
   8   9  -2    2.20    0.32
  -9   8  -2    1.79    0.26
  -8  -9   2    1.95    0.33
  -9   8   2    1.94    0.30
   8   9   2    2.24    0.29
   9  -8   2    2.01    0.22
   9   9  -2  134.60    3.61
   9  -9  -2  136.41    3.58
  -9  -9  -2  137.71    3.64
  -9   9  -2  135.49    3.56
  -9   9   2  135.67    3.59
  -9  -9   2  132.63    3.65
   9   9   2  139.60    3.58
   9  -9   2  135.74    3.52
   9 -10  -2    2.73    0.34
  10   9  -2    2.40    0.34
  -9  10  -2    1.86    0.30
 -10  -9  -2    2.04    0.38
 -10  -9   2    2.62    0.39
   9 -10   2    1.91    0.25
  -9  10   2    2.57    0.35
  10   9   2    1.97    0.29
  10   8  -2   21.01    0.84
 -10  -8  -2   21.59    0.89
   8 -10  -2   21.39    0.80
  -8  10  -2   20.51    0.79
  -8  10   2   20.32    0.82
   8 -10   2   21.97    0.74
 -10  -8   2   22.81    0.89
  10   8   2   21.65    0.79
  -7  10  -2    0.03    0.22
   7 -10  -2   -0.21    0.23
 -10  -7  -2   -0.09    0.25
  10   7  -2   -0.05    0.22
  10   7   2    0.00    0.20
  -7  10   2   -0.05    0.25
 -10  -7   2   -0.18    0.27
   7 -10   2    0.26    0.16
  -6  10  -2    1.92    0.26
 -10  -6  -2    1.97    0.31
  10   6  -2    1.88    0.28
   6 -10  -2    1.99    0.28
  10   6   2    1.64    0.22
  -6  10   2    1.51    0.26
 -10  -6   2    1.49    0.28
   6 -10   2    1.77    0.21
  10   5  -2   46.43    1.38
   5 -10  -2   46.12    1.36
  -5  10  -2   46.18    1.34
 -10  -5  -2   45.53    1.38
  10   5   2   47.13    1.33
 -10  -5   2   46.83    1.40
  -5  10   2   46.91    1.37
   5 -10   2   46.58    1.30
   4 -10  -2   42.59    1.26
  10   4  -2   42.52    1.27
  -4  10  -2   42.83    1.25
 -10  -4  -2   42.99    1.28
   4 -10   2   42.87    1.21
  -4  10   2   43.40    1.27
 -10  -4   2   42.11    1.30
  10   4   2   43.53    1.23
  -3  10  -2    7.96    0.43
  10   3  -2    7.79    0.46
   3 -10  -2    8.69    0.45
 -10  -3  -2    7.54    0.44
   3 -10   2    7.99    0.38
  10   3   2    7.70    0.39
  -3  10   2    7.60    0.44
 -10  -3   2    7.59    0.46
  -2  10  -2    7.93    0.44
 -10  -2  -2    8.11    0.44
   2 -10  -2    8.15    0.45
 -10  -2  -2    9.19    0.42
  10   2  -2    8.62    0.45
 -10  -2   2    8.57    0.47
  10   2   2    8.40    0.40
  -2  10   2    8.29    0.45
   2 -10   2    8.24    0.40
 -10  -1  -2  105.70    2.77
  10   1  -2  103.33    2.78
  -1  10  -2  104.63    2.78
 -10  -1  -2  113.14    2.78
   1 -10  -2  102.74    2.79
  10   1   2  106.93    2.74
   1 -10   2  103.80    2.76
 -10  -1   2  103.18    2.79
  -1  10   2  106.40    2.79
  10   0  -2    3.61    0.30
   0  10  -2    3.75    0.30
 -10   0  -2    3.29    0.25
   0 -10  -2    3.03    0.28
 -10   0  -2    2.60    0.24
   0 -10   2    3.25    0.26
 -10   0   2    3.33    0.28
  10   0   2    3.52    0.28
   0  10   2    3.15    0.27
  10  -1  -2   13.77    0.56
 -10   1  -2   14.83    0.52
   1  10  -2   13.29    0.57
  -1 -10  -2   14.32    0.59
 -10   1  -2   14.06    0.54
 -10   1   2   13.79    0.57
  10  -1   2   14.37    0.51
   1  10   2   13.93    0.56
  -1 -10   2   14.40    0.56
  -2 -10  -2   22.84    0.79
  10  -2  -2   22.07    0.75
 -10   2  -2   24.06    0.72
   2  10  -2   22.50    0.77
 -10   2  -2   21.13    0.72
  -2 -10   2   22.61    0.77
   2  10   2   21.80    0.76
 -10   2   2   21.22    0.76
  10  -2   2   22.73    0.70
  10  -3  -2    2.78    0.26
 -10   3  -2    3.14    0.26
 -10   3  -2    3.40    0.27
  -3 -10  -2    2.77    0.30
   3  10  -2    3.32    0.31
   3  10   2    2.93    0.27
  10  -3   2    3.42    0.27
 -10   3   2    2.68    0.27
  -3 -10   2    2.60    0.28
 -10   4  -2   15.75    0.54
 -10   4  -2   14.29    0.56
   4  10  -2   14.84    0.61
  10  -4  -2   15.06    0.59
  -4 -10  -2   14.75    0.65
  -4 -10   2   14.08    0.64
 -10   4   2   14.97    0.61
  10  -4   2   14.94    0.53
   4  10   2   14.78    0.60
 -10   5  -2    5.08    0.32
  -5 -10  -2    5.00    0.40
 -10   5  -2    5.07    0.37
   5  10  -2    3.58    0.32
  10  -5  -2    4.88    0.39
 -10   5   2    3.43    0.31
  10  -5   2    4.86    0.32
   5  10   2    4.83    0.40
  -5 -10   2    5.46    0.46
  10  -6  -2   51.92    1.48
 -10   6  -2   54.29    1.45
   6  10  -2   50.97    1.51
 -10   6  -2   50.04    1.45
  -6 -10  -2   49.21    1.54
  -6 -10   2   50.79    1.55
  10  -6   2   51.42    1.42
   6  10   2   51.17    1.48
 -10   6   2   51.35    1.49
  -7 -10  -2    1.23    0.31
   7  10  -2    0.98    0.26
  10  -7  -2    0.95    0.24
 -10   7  -2    1.10    0.24
 -10   7   2    1.19    0.27
  -7 -10   2    1.76    0.34
   7  10   2    0.91    0.23
  10  -7   2    1.05    0.20
  -8 -10  -2  212.67    5.68
 -10   8  -2  217.14    5.60
   8  10  -2  220.70    5.66
  10  -8  -2  223.62    5.63
 -10   8   2  218.44    5.64
  10  -8   2  219.95    5.57
   8  10   2  224.24    5.63
  -8 -10   2  217.97    5.70
 -10   9  -2   27.12    0.95
  -9 -10  -2   25.77    1.04
  10  -9  -2   28.97    0.98
   9  10  -2   27.25    1.00
 -10   9   2   28.47    1.00
  -9 -10   2   29.06    1.07
   9  10   2   27.30    0.96
  10  -9   2   27.53    0.89
 -10 -10  -2   90.99    2.63
  10 -10  -2   93.34    2.57
  10  10  -2   92.11    2.60
 -10  10  -2   94.88    2.55
  10 -10   2   90.23    2.49
 -10  10   2   94.86    2.59
 -10 -10   2   93.98    2.65
  10  10   2   96.26    2.56
  10 -11  -2    1.36    0.34
  11  10  -2    1.74    0.36
 -10  11  -2    1.40    0.31
 -11 -10  -2    1.69    0.41
 -10  11   2    0.84    0.33
  11  10   2    1.30    0.31
 -11 -10   2    1.52    0.38
  11   9  -2   -0.03    0.28
 -11  -9  -2   -0.36    0.32
   9 -11  -2   -0.44    0.25
  -9  11  -2   -0.25    0.25
 -11  -9   2   -0.12    0.31
  11   9   2   -0.08    0.23
  -9  11   2   -0.11    0.28
   9 -11   2    0.03    0.22
   8 -11  -2    3.65    0.37
  -8  11  -2    3.96    0.36
  11   8  -2    2.90    0.35
 -11  -8  -2    4.46    0.46
 -11  -8   2    4.42    0.45
  11   8   2    4.30    0.37
   8 -11   2    4.18    0.32
  -8  11   2    4.44    0.42
   7 -11  -2    4.61    0.39
  -7  11  -2    5.03    0.38
 -11  -7  -2    4.30    0.42
  11   7  -2    4.56    0.38
  -7  11   2    5.59    0.42
  11   7   2    5.04    0.42
   7 -11   2    5.07    0.37
 -11  -7   2    3.88    0.39
   6 -11  -2   31.18    1.02
 -11  -6  -2   30.85    1.07
  -6  11  -2   30.21    1.01
  11   6  -2   30.80    1.05
  -6  11   2   31.06    1.04
  11   6   2   31.65    0.99
 -11  -6   2   31.74    1.08
   6 -11   2   31.11    0.96
 -11  -5  -2    5.06    0.40
  -5  11  -2    4.99    0.37
   5 -11  -2    5.57    0.44
  11   5  -2    5.46    0.44
  11   5   2    5.27    0.39
   5 -11   2    5.24    0.36
 -11  -5   2    4.58    0.39
  -5  11   2    4.44    0.37
 -11  -4  -2   65.51    1.87
  -4  11  -2   64.97    1.84
  11   4  -2   66.20    1.87
   4 -11  -2   65.03    1.85
  -4  11   2   67.37    1.87
 -11  -4   2   65.83    1.89
  11   4   2   68.09    1.83
   4 -11   2   67.24    1.81
  11   3  -2   21.30    0.78
  -3  11  -2   20.82    0.76
 -11  -3  -2   20.61    0.78
   3 -11   2   22.39    0.73
  -3  11   2   22.27    0.79
  11   3   2   21.20    0.72
 -11  -3   2   21.21    0.80
   2 -11  -2   29.02    0.95
 -11  -2  -2   27.89    0.94
  11   2  -2   29.32    0.96
  -2  11  -2   29.12    0.95
  -2  11   2   30.02    0.96
  11   2   2   29.97    0.91
 -11  -2   2   29.95    0.98
   2 -11   2   29.89    0.91
  -1  11  -2    1.61    0.25
 -11  -1  -2    1.43    0.23
  11   1  -2    1.13    0.23
   1 -11  -2    1.69    0.26
   1 -11   2    1.16    0.20
  -1  11   2    1.72    0.27
 -11  -1   2    1.17    0.24
  11   1   2    1.84    0.21
   0  11  -2   19.48    0.74
  11   0  -2   20.01    0.73
 -11   0  -2   22.41    0.71
   0 -11  -2   20.37    0.76
 -11   0  -2   19.62    0.71
   0  11   2   19.62    0.73
   0 -11   2   19.62    0.71
  11   0   2   19.87    0.67
 -11   0   2   21.22    0.76
  -1 -11  -2   48.68    1.48
 -11   1  -2   49.37    1.43
   1  11  -2   49.51    1.47
 -11   1  -2   54.88    1.44
  11  -1  -2   49.36    1.46
  11  -1   2   51.02    1.41
   1  11   2   51.49    1.47
  -1 -11   2   51.85    1.46
 -11   1   2   49.62    1.47
 -11   2  -2    2.40    0.23
  -2 -11  -2    2.39    0.30
  11  -2  -2    2.03    0.26
   2  11  -2    2.52    0.30
 -11   2  -2    2.70    0.26
  -2 -11   2    2.11    0.28
  11  -2   2    2.57    0.23
 -11   2   2    2.58    0.29
   2  11   2    2.85    0.30
  -3 -11  -2    0.53    0.26
 -11   3  -2    0.57    0.17
 -11   3  -2    0.67    0.21
  11  -3  -2    0.52    0.22
   3  11  -2    0.06    0.21
  -3 -11   2    0.86    0.24
   3  11   2    0.41    0.20
  11  -3   2    0.36    0.17
 -11   3   2    0.40    0.22
  -4 -11  -2   43.61    1.34
 -11   4  -2   43.09    1.26
  11  -4  -2   44.12    1.28
 -11   4  -2   43.98    1.25
   4  11  -2   42.20    1.31
 -11   4   2   43.13    1.30
  11  -4   2   42.72    1.22
   4  11   2   42.49    1.29
  -4 -11   2   42.42    1.33
  -5 -11  -2   33.75    1.14
 -11   5  -2   32.79    1.05
 -11   5  -2   38.03    1.10
   5  11  -2   32.22    1.10
  11  -5  -2   33.54    1.07
   5  11   2   34.15    1.09
  11  -5   2   33.19    1.01
 -11   5   2   35.14    1.10
  -5 -11   2   34.93    1.14
  -6 -11  -2   16.35    0.76
  11  -6  -2   15.84    0.68
 -11   6  -2   17.70    0.67
   6  11  -2   15.75    0.71
  -6 -11   2   15.38    0.75
 -11   6   2   15.90    0.70
   6  11   2   17.28    0.69
  11  -6   2   16.37    0.60
  -7 -11  -2   54.72    1.71
 -11   7  -2   55.81    1.61
  11  -7  -2   55.62    1.63
   7  11  -2   57.00    1.67
  11  -7   2   55.73    1.56
 -11   7   2   57.34    1.66
  -7 -11   2   56.25    1.71
   7  11   2   57.41    1.64
   8  11  -2   10.92    0.63
  11  -8  -2   10.67    0.58
 -11   8  -2   11.63    0.59
  -8 -11  -2    9.41    0.69
  -8 -11   2   11.25    0.70
   8  11   2   10.77    0.58
  11  -8   2   10.62    0.51
 -11   8   2   10.05    0.63
 -11   9  -2   73.31    2.09
  11  -9  -2   76.62    2.11
   9  11  -2   75.29    2.15
  -9 -11  -2   74.74    2.19
   9  11   2   73.09    2.11
 -11   9   2   74.15    2.13
  -9 -11   2   75.18    2.21
  11  -9   2   74.60    2.04
 -10 -11  -2   14.68    0.84
 -11  10  -2   14.51    0.69
  11 -10  -2   13.88    0.71
  10  11  -2   14.56    0.76
 -10 -11   2   13.46    0.85
  10  11   2   14.41    0.69
 -11  10   2   14.63    0.76
  11  11  -2    9.15    0.68
 -11 -11  -2   10.53    0.77
 -11  11  -2    9.55    0.63
  11 -11  -2    8.21    0.61
 -11 -11   2   10.18    0.77
 -11  11   2    9.94    0.70
  11  11   2    9.84    0.62
  12  11  -2    1.32    0.38
  11 -12  -2    1.38    0.37
 -12 -11  -2    1.88    0.45
 -11  12  -2    1.94    0.38
 -11  12   2    0.83    0.36
 -12 -11   2    1.49    0.44
  12  11   2    1.14    0.32
  12  10  -2    8.98    0.68
 -12 -10  -2    9.07    0.77
 -10  12  -2    9.88    0.67
  10 -12  -2   10.43    0.65
 -12 -10   2   10.89    0.78
 -10  12   2   10.20    0.69
  12  10   2   10.00    0.61
 -12  -9  -2   36.86    1.30
  -9  12  -2   36.39    1.22
   9 -12  -2   37.25    1.22
  12   9  -2   37.40    1.26
 -12  -9   2   37.18    1.32
  -9  12   2   36.68    1.26
  12   9   2   35.99    1.19
 -12  -8  -2    0.10    0.33
   8 -12  -2    0.15    0.28
  -8  12  -2    0.17    0.27
  12   8  -2    0.14    0.28
  -8  12   2    0.18    0.30
   8 -12   2   -0.11    0.19
 -12  -8   2    0.23    0.35
  12   8   2    0.16    0.23
 -12  -7  -2    0.30    0.31
  12   7  -2    0.36    0.29
   7 -12  -2    0.04    0.28
  -7  12  -2    0.03    0.26
   7 -12   2    0.07    0.20
 -12  -7   2    0.34    0.30
  12   7   2    0.19    0.23
  -7  12   2    0.18    0.28
  12   6  -2   15.89    0.73
   6 -12  -2   16.03    0.71
 -12  -6  -2   14.93    0.74
  -6  12  -2   15.44    0.70
 -12  -6   2   17.71    0.78
   6 -12   2   15.75    0.62
  12   6   2   16.70    0.66
  -6  12   2   15.95    0.73
  12   5  -2   48.42    1.47
  -5  12  -2   49.50    1.46
   5 -12  -2   48.84    1.46
 -12  -5  -2   46.88    1.48
   5 -12   2   47.85    1.40
  12   5   2   47.98    1.42
  -5  12   2   52.52    1.49
 -12  -5   2   48.38    1.51
   4 -12  -2    2.15    0.30
  -4  12  -2    2.06    0.29
 -12  -4  -2    2.08    0.31
  12   4  -2    2.95    0.33
   4 -12   2    2.69    0.28
  12   4   2    2.41    0.27
 -12  -4   2    2.35    0.32
  -4  12   2    2.66    0.35
  -3  12  -2    9.73    0.54
  12   3  -2   10.09    0.56
   3 -12  -2    9.43    0.54
 -12  -3  -2    9.72    0.56
 -12  -3   2    9.94    0.57
   3 -12   2   10.04    0.49
  -3  12   2   10.02    0.56
  12   3   2   10.06    0.49
  12   2  -2    6.49    0.48
  -2  12  -2    5.33    0.46
   2 -12  -2    6.68    0.48
 -12  -2  -2    6.70    0.48
  -2  12   2    6.16    0.48
   2 -12   2    6.54    0.41
  12   2   2    6.89    0.42
 -12  -2   2    6.34    0.50
   1 -12  -2    7.06    0.49
 -12  -1  -2    6.69    0.47
  12   1  -2    6.35    0.47
  -1  12  -2    6.25    0.48
  12   1   2    7.20    0.41
 -12  -1   2    7.16    0.51
   1 -12   2    6.61    0.43
  -1  12   2    7.34    0.48
 -12   0  -2  183.12    4.72
  12   0  -2  184.13    4.74
   0  12  -2  184.96    4.75
   0 -12  -2  183.47    4.76
 -12   0   2  183.91    4.76
   0 -12   2  179.33    4.73
   0  12   2  183.90    4.75
  12   0   2  185.93    4.69
  -1 -12  -2    0.03    0.24
  12  -1  -2   -0.10    0.23
   1  12  -2    0.04    0.24
 -12   1  -2    0.05    0.22
 -12   1   2    0.19    0.26
  -1 -12   2   -0.13    0.22
   1  12   2    0.30    0.24
  12  -1   2    0.08    0.18
  12  -2  -2  189.29    4.97
  -2 -12  -2  194.60    5.01
 -12   2  -2  189.84    4.95
   2  12  -2  188.97    4.99
  -2 -12   2  197.32    5.00
  12  -2   2  199.05    4.93
   2  12   2  191.50    4.98
 -12   2   2  194.06    4.99
  12  -3  -2    7.00    0.49
  -3 -12  -2    7.84    0.52
 -12   3  -2    7.39    0.47
   3  12  -2    7.80    0.52
   3  12   2    7.43    0.50
 -12   3   2    6.94    0.52
  -3 -12   2    6.95    0.51
  12  -3   2    7.22    0.41
  12  -4  -2    6.34    0.47
  -4 -12  -2    6.63    0.56
   4  12  -2    6.32    0.51
 -12   4  -2    6.63    0.46
  12  -4   2    6.07    0.39
 -12   4   2    6.02    0.50
  -4 -12   2    5.83    0.44
   4  12   2    6.34    0.48
 -12   5  -2   41.03    1.26
   5  12  -2   42.13    1.32
  -5 -12  -2   40.73    1.35
  12  -5  -2   41.77    1.28
   5  12   2   41.89    1.29
 -12   5   2   41.73    1.30
  -5 -12   2   41.86    1.34
  12  -5   2   41.13    1.21
  -6 -12  -2    3.43    0.44
   6  12  -2    3.39    0.37
  12  -6  -2    2.81    0.33
 -12   6  -2    3.21    0.33
 -12   6   2    3.22    0.38
   6  12   2    2.81    0.35
  12  -6   2    2.97    0.27
  -6 -12   2    4.12    0.44
  -7 -12  -2    7.94    0.66
   7  12  -2    8.57    0.59
  12  -7  -2    8.02    0.54
 -12   7  -2    8.45    0.54
 -12   7   2    8.17    0.58
   7  12   2    8.08    0.56
  -7 -12   2    8.67    0.65
  12  -7   2    8.09    0.46
  12  -8  -2   26.30    0.98
 -12   8  -2   27.66    0.97
   8  12  -2   27.15    1.02
  -8 -12  -2   26.21    1.08
  -8 -12   2   27.21    1.10
   8  12   2   26.91    0.98
 -12   8   2   28.69    1.02
 -12   9  -2    5.17    0.43
   9  12  -2    5.43    0.48
  -9 -12  -2    4.19    0.47
  12  -9  -2    5.94    0.47
 -12   9   2    4.20    0.44
  -9 -12   2    5.13    0.52
   9  12   2    4.23    0.39
  12 -10  -2    7.02    0.58
  10  12  -2    6.43    0.53
 -12  10  -2    7.58    0.61
 -10 -12  -2    7.53    0.60
  10  12   2    8.47    0.59
 -12  10   2    8.15    0.68
 -10 -12   2    7.86    0.63
 -12  11  -2    0.27    0.31
 -11 -12  -2    0.48    0.42
  12 -11  -2    0.16    0.30
  11  12  -2    0.50    0.36
 -12  11   2    0.29    0.38
 -11 -12   2    0.49    0.41
  11  12   2    0.09    0.30
 -12  12  -2   24.52    1.01
  12 -12  -2   25.55    1.03
  12  12  -2   25.06    1.08
 -12 -12  -2   26.34    1.18
  12  12   2   24.35    0.99
 -12  12   2   25.13    1.08
 -12 -12   2   24.33    1.18
 -12  13  -2   13.32    0.83
 -13 -12  -2   14.96    0.96
  13  12  -2   13.56    0.87
  12 -13  -2   11.35    0.77
 -12  13   2   13.06    0.87
 -13 -12   2   13.99    0.99
  11 -13  -2   62.22    1.89
 -13 -11  -2   63.03    1.99
 -11  13  -2   59.81    1.88
  13  11  -2   61.62    1.92
  13  11   2   57.69    1.89
 -13 -11   2   65.55    2.00
 -11  13   2   62.81    1.92
 -10  13  -2    6.50    0.52
  10 -13  -2    7.96    0.57
 -13 -10  -2    7.94    0.63
  13  10  -2    7.31    0.57
 -10  13   2    8.66    0.71
 -13 -10   2    7.28    0.63
  13  10   2    6.90    0.56
 -13  -9  -2   35.65    1.31
  -9  13  -2   36.66    1.22
   9 -13  -2   36.72    1.22
  13   9  -2   33.48    1.25
  -9  13   2   36.00    1.26
  13   9   2   35.43    1.19
 -13  -9   2   34.78    1.31
  13   8  -2   39.70    1.31
   8 -13  -2   39.44    1.28
 -13  -8  -2   38.36    1.35
  -8  13  -2   39.56    1.28
  13   8   2   37.12    1.23
  -8  13   2   37.63    1.31
 -13  -8   2   38.51    1.37
  13   7  -2    0.24    0.31
 -13  -7  -2    0.03    0.33
   7 -13  -2    0.06    0.27
  -7  13  -2   -0.13    0.28
   7 -13   2    0.11    0.23
 -13  -7   2    0.19    0.33
  13   7   2   -0.09    0.23
  -7  13   2   -0.07    0.31
   6 -13  -2    1.10    0.32
  -6  13  -2    0.77    0.31
 -13  -6  -2    1.22    0.33
  13   6  -2    1.24    0.32
 -13  -6   2    1.60    0.37
  13   6   2    0.98    0.26
   6 -13   2    1.06    0.24
  -6  13   2    1.15    0.32
   5 -13  -2   16.22    0.73
  13   5  -2   16.46    0.75
 -13  -5  -2   15.77    0.77
  -5  13  -2   16.20    0.73
 -13  -5   2   15.68    0.77
  -5  13   2   15.74    0.75
  13   5   2   15.76    0.67
   5 -13   2   17.07    0.66
 -13  -4  -2    4.21    0.40
  13   4  -2    4.11    0.38
  -4  13  -2    4.33    0.39
   4 -13  -2    4.80    0.41
 -13  -4   2    3.84    0.38
  13   4   2    5.01    0.37
  -4  13   2    3.52    0.38
   4 -13   2    4.28    0.34
   3 -13  -2    8.52    0.55
  13   3  -2    8.54    0.55
  -3  13  -2    8.94    0.57
 -13  -3  -2    8.73    0.58
  -3  13   2    9.04    0.58
 -13  -3   2    8.70    0.60
   3 -13   2    8.53    0.49
  13   3   2    8.68    0.49
  13   2  -2    0.56    0.28
   2 -13  -2    0.37    0.28
  -2  13  -2    0.08    0.26
 -13  -2  -2    0.27    0.25
   2 -13   2    0.36    0.21
 -13  -2   2    0.04    0.26
  -2  13   2    0.72    0.29
  13   2   2    0.62    0.22
   1 -13  -2   37.57    1.22
  -1  13  -2   36.55    1.20
 -13  -1  -2   37.06    1.19
  13   1  -2   36.64    1.19
  -1  13   2   39.30    1.21
 -13  -1   2   36.11    1.21
   1 -13   2   38.37    1.16
  13   1   2   37.97    1.14
  13   0  -2   11.61    0.61
 -13   0  -2   11.84    0.60
   0  13  -2   11.39    0.64
   0 -13  -2   11.91    0.64
  13   0   2   11.89    0.54
 -13   0   2   12.70    0.66
   0 -13   2   12.27    0.58
   0  13   2   10.59    0.60
  -1 -13  -2  172.95    4.53
   1  13  -2  174.65    4.52
 -13   1  -2  171.82    4.48
  13  -1  -2  168.42    4.49
   1  13   2  171.15    4.50
 -13   1   2  173.66    4.52
  13  -1   2  173.33    4.44
  -1 -13   2  177.10    4.51
   2  13  -2    6.66    0.54
  -2 -13  -2    5.13    0.44
  13  -2  -2    6.74    0.51
 -13   2  -2    6.46    0.48
   2  13   2    5.73    0.43
 -13   2   2    6.46    0.54
  13  -2   2    6.75    0.43
  -2 -13   2    7.40    0.53
 -13   3  -2   19.48    0.77
  13  -3  -2   19.28    0.78
  -3 -13  -2   19.11    0.87
   3  13  -2   20.14    0.82
   3  13   2   20.28    0.80
 -13   3   2   19.95    0.82
  -3 -13   2   21.81    0.85
  13  -3   2   18.72    0.70
 -13   4  -2   20.97    0.81
  -4 -13  -2   21.23    0.93
   4  13  -2   21.90    0.87
  13  -4  -2   21.73    0.82
  13  -4   2   21.10    0.75
  -4 -13   2   22.02    0.90
 -13   4   2   21.58    0.86
   4  13   2   21.56    0.84
  -5 -13  -2   61.71    1.84
  13  -5  -2   61.17    1.75
 -13   5  -2   59.81    1.73
   5  13  -2   61.85    1.80
  13  -5   2   59.08    1.68
  -5 -13   2   55.39    1.80
   5  13   2   61.67    1.77
 -13   5   2   59.38    1.76
  -6 -13  -2    0.94    0.37
  13  -6  -2    0.52    0.28
 -13   6  -2    0.84    0.29
   6  13  -2    0.98    0.31
   6  13   2    0.89    0.30
 -13   6   2    0.95    0.33
  -6 -13   2    1.09    0.33
 -13   7  -2   29.67    1.03
   7  13  -2   29.92    1.09
  -7 -13  -2   30.82    1.16
  13  -7  -2   29.24    1.04
   7  13   2   30.39    1.07
  -7 -13   2   27.79    1.14
 -13   7   2   29.83    1.08
  -8 -13  -2   -0.50    0.34
   8  13  -2   -0.09    0.30
 -13   8  -2   -0.55    0.27
  13  -8  -2    0.08    0.28
 -13   8   2    0.18    0.31
   8  13   2    0.16    0.29
  -8 -13   2   -0.27    0.36
  -9 -13  -2    6.75    0.60
   9  13  -2    5.43    0.48
  13  -9  -2    6.35    0.49
 -13   9  -2    6.75    0.49
 -13   9   2    5.50    0.49
  -9 -13   2    6.42    0.58
   9  13   2    5.33    0.45
  13 -10  -2   17.64    0.84
  10  13  -2   17.35    0.88
 -10 -13  -2   17.67    0.99
 -13  10  -2   17.74    0.84
  10  13   2   18.98    0.85
 -13  10   2   17.71    0.91
 -10 -13   2   18.43    1.01
 -11 -13  -2    4.11    0.57
 -13  11  -2    3.65    0.45
  13 -11  -2    3.83    0.45
  11  13  -2    2.80    0.45
 -13  11   2    4.12    0.50
 -11 -13   2    4.26    0.57
  11  13   2    4.11    0.43
  13 -12  -2   -0.26    0.35
  12  13  -2    0.32    0.40
 -12 -13  -2    0.07    0.47
 -13  12  -2    0.25    0.36
 -12 -13   2    0.74    0.48
  12  13   2    0.23    0.34
 -13  12   2   -0.24    0.40
 -13 -13  -2    7.02    0.69
 -13  13  -2    8.31    0.62
  13  13  -2    6.85    0.60
 -13  13   2    7.57    0.66
 -13 -13   2    7.13    0.69
  14  13  -2   23.94    1.14
 -14 -13  -2   24.24    1.24
 -13  14  -2   23.20    1.10
 -14 -13   2   24.29    1.29
 -13  14   2   23.54    1.19
  14  12  -2    2.64    0.47
 -14 -12  -2    3.54    0.57
 -12  14  -2    3.61    0.48
 -14 -12   2    5.22    0.64
 -12  14   2    3.23    0.49
 -11  14  -2    5.25    0.52
 -14 -11  -2    8.24    0.70
  11 -14  -2    7.45    0.59
  14  11  -2    7.85    0.62
 -14 -11   2    7.27    0.67
 -11  14   2    6.60    0.61
 -10  14  -2   14.57    0.83
  10 -14  -2   14.20    0.83
  14  10  -2   13.09    0.83
 -14 -10  -2   14.04    0.90
 -10  14   2   13.76    0.86
 -14 -10   2   15.43    0.95
   9 -14  -2   14.90    0.79
  -9  14  -2   13.09    0.80
  14   9  -2   14.82    0.81
 -14  -9  -2   13.72    0.87
  -9  14   2   14.60    0.83
 -14  -9   2   13.50    0.87
  14   8  -2    7.31    0.57
 -14  -8  -2    9.26    0.76
   8 -14  -2    8.86    0.68
  -8  14  -2    6.88    0.53
  -8  14   2    8.83    0.70
 -14  -8   2    8.39    0.65
  14   8   2    8.26    0.61
 -14  -7  -2   17.69    0.91
   7 -14  -2   18.02    0.84
  14   7  -2   18.47    0.86
  -7  14  -2   17.67    0.84
 -14  -7   2   17.94    0.92
  14   7   2   16.92    0.76
  -7  14   2   17.47    0.85
  14   6  -2   63.37    1.90
   6 -14  -2   62.45    1.88
  -6  14  -2   63.99    1.88
 -14  -6  -2   62.34    1.92
  -6  14   2   63.63    1.89
   6 -14   2   63.15    1.84
 -14  -6   2   65.61    1.95
  14   6   2   64.46    1.84
   5 -14  -2    3.05    0.39
  -5  14  -2    2.10    0.35
 -14  -5  -2    2.89    0.41
  14   5  -2    2.10    0.35
 -14  -5   2    2.90    0.42
  -5  14   2    2.41    0.38
  14   5   2    2.91    0.34
   5 -14   2    3.20    0.33
  14   4  -2    0.77    0.31
   4 -14  -2    0.24    0.28
 -14  -4  -2    0.38    0.31
  -4  14  -2    0.58    0.30
  14   4   2    0.80    0.25
   4 -14   2    1.10    0.26
  -4  14   2    0.32    0.31
 -14  -4   2    0.42    0.32
  14   3  -2   23.25    0.89
  -3  14  -2   22.30    0.90
 -14  -3  -2   21.47    0.88
   3 -14  -2   23.17    0.90
   3 -14   2   22.71    0.82
  14   3   2   21.64    0.82
 -14  -3   2   22.83    0.94
  -3  14   2   22.02    0.90
  14   2  -2    7.56    0.57
 -14  -2  -2    6.82    0.56
  -2  14  -2    5.79    0.46
   2 -14  -2    5.54    0.44
   2 -14   2    7.15    0.49
  14   2   2    6.64    0.47
 -14  -2   2    7.81    0.61
  -2  14   2    7.45    0.52
 -14  -1  -2    0.53    0.27
   1 -14  -2    0.62    0.32
  14   1  -2    1.15    0.30
  -1  14  -2    0.88    0.31
   1 -14   2    0.40    0.24
  -1  14   2    0.97    0.33
  14   1   2    0.78    0.23
 -14  -1   2    0.58    0.29
   0 -14  -2  121.16    3.36
   0  14  -2  120.90    3.34
  14   0  -2  126.24    3.33
 -14   0  -2  126.42    3.32
 -14   0   2  127.16    3.36
   0 -14   2  126.38    3.33
   0  14   2  123.46    3.34
  14   0   2  123.82    3.28
   1  14  -2   29.55    1.08
  -1 -14  -2   31.64    1.12
 -14   1  -2   29.90    1.05
  14  -1  -2   29.82    1.06
 -14   1   2   31.28    1.10
  14  -1   2   29.92    0.99
  -1 -14   2   31.48    1.07
   1  14   2   31.65    1.09
  14  -2  -2   84.04    2.34
   2  14  -2   82.39    2.36
 -14   2  -2   82.47    2.32
  -2 -14  -2   83.44    2.39
   2  14   2   83.94    2.35
 -14   2   2   86.20    2.37
  -2 -14   2   84.33    2.36
  14  -2   2   82.77    2.27
 -14   3  -2   -0.19    0.25
  14  -3  -2   -0.02    0.26
  -3 -14  -2   -0.29    0.33
   3  14  -2   -0.13    0.29
  14  -3   2    0.06    0.21
 -14   3   2   -0.01    0.27
   3  14   2   -0.23    0.28
  -3 -14   2    0.11    0.31
   4  14  -2    7.74    0.62
  -4 -14  -2    7.02    0.55
 -14   4  -2    8.48    0.57
  14  -4  -2    7.51    0.55
  -4 -14   2    8.27    0.63
 -14   4   2    8.14    0.60
   4  14   2    7.30    0.58
  -5 -14  -2    2.16    0.44
 -14   5  -2    2.15    0.33
  14  -5  -2    1.55    0.31
   5  14  -2    2.66    0.40
  -5 -14   2    2.21    0.41
   5  14   2    2.37    0.37
 -14   5   2    2.06    0.36
   6  14  -2   40.99    1.39
  14  -6  -2   41.01    1.33
 -14   6  -2   42.17    1.33
  -6 -14  -2   41.85    1.45
   6  14   2   41.65    1.35
 -14   6   2   40.80    1.37
  -6 -14   2   40.50    1.42
  -7 -14  -2   15.31    0.89
   7  14  -2   15.03    0.81
 -14   7  -2   14.97    0.76
  14  -7  -2   14.06    0.75
  -7 -14   2   15.10    0.86
   7  14   2   15.47    0.76
 -14   7   2   14.83    0.81
  -8 -14  -2    0.37    0.39
 -14   8  -2    0.05    0.30
   8  14  -2    0.16    0.35
  14  -8  -2    0.47    0.31
 -14   8   2    0.43    0.35
   8  14   2    0.43    0.33
  -8 -14   2    0.09    0.39
  14  -9  -2    9.61    0.68
  -9 -14  -2   11.02    0.84
 -14   9  -2    9.77    0.71
   9  14  -2   10.24    0.77
   9  14   2   11.26    0.71
 -14   9   2   10.73    0.76
  -9 -14   2   10.05    0.83
 -10 -14  -2    1.03    0.46
  10  14  -2    0.36    0.41
  14 -10  -2    0.94    0.36
 -14  10  -2    1.37    0.38
 -14  10   2    1.05    0.41
 -10 -14   2    0.51    0.45
  10  14   2    1.26    0.37
  14 -11  -2   22.05    1.07
 -11 -14  -2   27.28    1.21
  11  14  -2   24.88    1.10
 -14  11  -2   24.83    1.06
 -14  11   2   27.02    1.14
 -11 -14   2   27.13    1.22
  11  14   2   25.26    1.06
 -14  12  -2    0.32    0.40
 -12 -14  -2    0.61    0.51
  12  14  -2    0.91    0.44
 -12 -14   2   -0.13    0.49
 -14  12   2    0.05    0.45
 -14  13  -2    1.75    0.47
 -13 -14  -2    1.69    0.55
  13  14  -2    1.09    0.45
 -13 -14   2    1.83    0.57
 -14  13   2    2.47    0.54
 -14 -14  -2    3.44    0.65
  14  14  -2    2.84    0.52
 -14  14  -2    4.58    0.58
 -14 -14   2    4.09    0.67
 -14  14   2    2.91    0.59
 -14  15  -2    6.88    0.66
 -15 -14  -2    5.98    0.74
  15  14  -2    5.81    0.64
 -14  15   2    6.19    0.73
 -15 -14   2    6.88    0.75
 -15 -13  -2    5.79    0.71
  15  13  -2    4.93    0.61
 -13  15  -2    5.47    0.60
 -13  15   2    5.15    0.66
 -15 -13   2    5.55    0.72
 -15 -12  -2   20.76    1.16
  15  12  -2   18.97    1.03
 -12  15  -2   19.06    1.02
 -12  15   2   19.06    1.06
 -15 -12   2   19.10    1.19
  15  11  -2    4.98    0.56
 -11  15  -2    4.00    0.51
 -15 -11  -2    3.48    0.58
 -11  15   2    3.30    0.49
 -15 -11   2    4.09    0.59
 -10  15  -2    0.27    0.37
 -15 -10  -2    0.18    0.44
  10 -15  -2   -0.11    0.38
  15  10  -2    0.32    0.38
 -15 -10   2    0.40    0.48
 -10  15   2   -0.31    0.41
  -9  15  -2    1.82    0.41
  15   9  -2    1.85    0.43
   9 -15  -2    1.33    0.38
 -15  -9  -2    2.07    0.47
  -9  15   2    1.59    0.42
 -15  -9   2    2.02    0.48
  -8  15  -2    2.78    0.43
 -15  -8  -2    3.40    0.49
   8 -15  -2    2.76    0.45
  15   8  -2    3.15    0.44
  -8  15   2    3.21    0.46
 -15  -8   2    3.42    0.50
 -15  -7  -2   70.86    2.17
  15   7  -2   72.27    2.15
   7 -15  -2   71.56    2.13
  -7  15  -2   72.19    2.13
 -15  -7   2   72.92    2.21
  -7  15   2   72.94    2.15
  -6  15  -2    4.91    0.48
   6 -15  -2    6.34    0.51
 -15  -6  -2    5.61    0.54
  15   6  -2    6.09    0.52
 -15  -6   2    5.94    0.54
  -6  15   2    5.13    0.50
  15   5  -2   19.77    0.89
   5 -15  -2   20.53    0.90
  -5  15  -2   21.27    0.93
 -15  -5  -2   20.96    0.93
  -5  15   2   18.85    0.93
 -15  -5   2   21.67    0.98
 -15  -4  -2   36.74    1.26
   4 -15  -2   34.71    1.23
  15   4  -2   35.71    1.23
  -4  15  -2   35.46    1.24
   4 -15   2   35.31    1.16
 -15  -4   2   35.94    1.28
  -4  15   2   35.22    1.26
  -3  15  -2   20.62    0.91
  15   3  -2   20.87    0.90
   3 -15  -2   22.84    0.92
 -15  -3  -2   19.89    0.89
 -15  -3   2   20.94    0.94
  -3  15   2   21.70    0.92
   3 -15   2   21.96    0.84
 -15  -2  -2   18.44    0.84
  -2  15  -2   16.92    0.82
   2 -15  -2   18.08    0.84
  15   2  -2   18.13    0.81
   2 -15   2   18.32    0.76
 -15  -2   2   18.59    0.87
  -2  15   2   17.45    0.84
  15   1  -2    3.36    0.42
   1 -15  -2    3.14    0.42
  -1  15  -2    2.45    0.38
 -15  -1  -2    2.99    0.38
   1 -15   2    3.65    0.39
  -1  15   2    3.20    0.39
 -15  -1   2    2.98    0.42
  15   0  -2    9.34    0.62
   0  15  -2    9.44    0.65
 -15   0  -2    9.67    0.62
   0 -15  -2    9.41    0.67
   0  15   2    9.56    0.65
 -15   0   2    9.54    0.68
   0 -15   2    9.46    0.61
 -15   1  -2   10.36    0.65
   1  15  -2    9.48    0.69
  15  -1  -2   10.60    0.65
  -1 -15  -2   10.39    0.70
   1  15   2   10.69    0.66
  -1 -15   2   10.92    0.66
 -15   1   2   10.84    0.69
  15  -2  -2    0.00    0.30
  -2 -15  -2   -0.08    0.34
   2  15  -2   -0.07    0.33
 -15   2  -2    0.03    0.28
   2  15   2    0.36    0.32
  -2 -15   2    0.08    0.31
 -15   2   2    0.65    0.35
 -15   3  -2    4.45    0.41
  15  -3  -2    4.46    0.43
  -3 -15  -2    4.25    0.48
   3  15  -2    5.63    0.51
  -3 -15   2    5.59    0.50
   3  15   2    4.56    0.45
 -15   3   2    5.29    0.47
  -4 -15  -2    2.85    0.49
   4  15  -2    2.39    0.39
 -15   4  -2    2.87    0.37
  15  -4  -2    1.98    0.35
  -4 -15   2    2.92    0.45
   4  15   2    2.70    0.40
 -15   4   2    2.87    0.43
   5  15  -2   21.88    0.98
 -15   5  -2   22.08    0.92
  15  -5  -2   21.80    0.92
  -5 -15  -2   22.77    1.04
   5  15   2   23.92    0.95
 -15   5   2   21.80    0.97
  -5 -15   2   21.87    1.01
   6  15  -2   43.71    1.44
 -15   6  -2   40.84    1.37
  -6 -15  -2   42.71    1.50
  15  -6  -2   42.59    1.38
 -15   6   2   41.63    1.43
   6  15   2   42.50    1.40
  -6 -15   2   40.60    1.48
  -7 -15  -2    6.11    0.61
  15  -7  -2    6.21    0.51
   7  15  -2    7.80    0.61
 -15   7  -2    6.57    0.51
   7  15   2    7.79    0.63
 -15   7   2    6.15    0.54
  -7 -15   2    6.85    0.62
  15  -8  -2    2.50    0.41
   8  15  -2    1.82    0.43
 -15   8  -2    2.27    0.40
  -8 -15  -2    2.90    0.54
 -15   8   2    2.15    0.44
   8  15   2    2.35    0.43
  -8 -15   2    2.91    0.52
  -9 -15  -2    0.71    0.44
  15  -9  -2    0.30    0.35
   9  15  -2    0.58    0.38
 -15   9  -2    0.34    0.35
   9  15   2    0.61    0.38
  -9 -15   2   -0.38    0.41
 -15   9   2   -0.12    0.40
  10  15  -2   19.66    1.02
 -15  10  -2   20.53    0.97
 -10 -15  -2   21.43    1.15
 -10 -15   2   21.10    1.13
 -15  10   2   21.09    1.05
  10  15   2   20.88    0.97
 -11 -15  -2    2.41    0.58
 -15  11  -2    2.42    0.48
  11  15  -2    2.10    0.48
 -11 -15   2    2.63    0.58
 -15  11   2    2.36    0.52
 -12 -15  -2    7.70    0.75
 -15  12  -2    5.27    0.57
  12  15  -2    5.93    0.62
 -12 -15   2    6.45    0.71
 -15  12   2    5.57    0.63
  13  15  -2    3.63    0.57
 -15  13  -2    4.03    0.55
 -13 -15  -2    4.53    0.66
 -13 -15   2    5.14    0.68
 -15  13   2    3.97    0.63
  14  15  -2    1.22    0.51
 -15  14  -2   -0.40    0.47
 -14 -15  -2    0.62    0.59
 -15  14   2   -0.23    0.53
 -14 -15   2    0.21    0.58
 -16 -13  -2    2.11    0.62
 -13  16  -2    0.88    0.48
  16  13  -2    0.99    0.47
 -16 -13   2    2.03    0.63
 -13  16   2    1.35    0.49
  16  12  -2   13.96    0.95
 -16 -12  -2   14.61    1.15
 -12  16  -2   13.87    0.97
 -16 -12   2   15.51    1.14
 -12  16   2   13.23    1.00
 -11  16  -2    1.23    0.46
 -16 -11  -2    0.55    0.53
  16  11  -2    1.78    0.48
 -16 -11   2    0.84    0.53
 -11  16   2    0.89    0.45
  16  10  -2    1.46    0.45
 -16 -10  -2    1.71    0.51
 -10  16  -2    1.24    0.45
 -10  16   2    1.50    0.49
 -16 -10   2    1.24    0.54
  16   9  -2    1.32    0.42
 -16  -9  -2    1.75    0.50
   9 -16  -2    1.88    0.44
  -9  16  -2    1.54    0.44
 -16  -9   2    2.32    0.54
  -9  16   2    1.58    0.46
 -16  -8  -2   58.22    1.93
  16   8  -2   60.34    1.90
   8 -16  -2   60.35    1.89
  -8  16  -2   58.22    1.87
  -8  16   2   60.29    1.90
 -16  -8   2   61.03    1.97
 -16  -7  -2    5.71    0.57
  -7  16  -2    7.21    0.59
   7 -16  -2    7.25    0.60
  16   7  -2    6.39    0.56
 -16  -7   2    5.82    0.63
  -7  16   2    6.77    0.58
  -6  16  -2  117.09    3.22
   6 -16  -2  112.42    3.21
 -16  -6  -2  117.20    3.25
  16   6  -2  116.00    3.23
 -16  -6   2  116.60    3.28
  -6  16   2  116.28    3.23
  -5  16  -2    3.82    0.49
  16   5  -2    3.76    0.44
   5 -16  -2    3.98    0.47
 -16  -5  -2    4.02    0.50
 -16  -5   2    3.76    0.51
  -5  16   2    3.36    0.49
  -4  16  -2    0.43    0.36
   4 -16  -2   -0.23    0.36
  16   4  -2   -0.13    0.32
 -16  -4  -2    0.29    0.37
 -16  -4   2    0.23    0.38
  -4  16   2   -0.21    0.36
   3 -16  -2   23.48    0.99
 -16  -3  -2   22.52    1.00
  16   3  -2   23.68    0.97
  -3  16  -2   23.57    0.99
  -3  16   2   23.38    1.01
 -16  -3   2   21.95    1.01
 -16  -2  -2   33.68    1.26
  -2  16  -2   35.47    1.27
   2 -16  -2   34.23    1.27
  16   2  -2   37.93    1.26
   2 -16   2   35.51    1.20
  -2  16   2   34.59    1.28
 -16  -2   2   37.13    1.31
 -16  -1  -2    0.54    0.34
  16   1  -2    0.22    0.33
   1 -16  -2    0.33    0.36
  -1  16  -2    0.21    0.35
   1 -16   2   -0.17    0.29
 -16  -1   2    0.20    0.35
  -1  16   2    0.30    0.35
  16   0  -2    4.69    0.46
   0 -16  -2    5.80    0.54
 -16   0  -2    6.20    0.50
   0  16  -2    4.18    0.48
 -16   0   2    5.73    0.53
   0  16   2    5.65    0.51
   0 -16   2    5.14    0.45
 -16   1  -2    0.52    0.34
  -1 -16  -2    1.03    0.41
  16  -1  -2   -0.02    0.33
   1  16  -2    0.36    0.34
  -1 -16   2    0.40    0.32
   1  16   2    0.44    0.34
 -16   1   2    0.14    0.35
  -2 -16  -2    2.56    0.48
 -16   2  -2    2.96    0.41
  16  -2  -2    1.70    0.35
   2  16  -2    1.97    0.41
   2  16   2    2.26    0.39
 -16   2   2    2.35    0.42
  -2 -16   2    2.75    0.43
 -16   3  -2    9.59    0.69
   3  16  -2    9.35    0.72
  -3 -16  -2    9.31    0.79
  16  -3  -2    9.36    0.67
   3  16   2    9.49    0.71
 -16   3   2   10.83    0.76
  -3 -16   2   10.17    0.74
   4  16  -2   -0.53    0.34
 -16   4  -2    0.38    0.34
  16  -4  -2   -0.33    0.31
  -4 -16  -2   -0.08    0.39
 -16   4   2    0.38    0.35
  -4 -16   2   -0.09    0.36
   4  16   2   -0.07    0.33
   5  16  -2    7.32    0.59
  -5 -16  -2    7.25    0.63
 -16   5  -2    6.95    0.54
  16  -5  -2    6.89    0.53
 -16   5   2    6.02    0.53
   5  16   2    6.19    0.52
  -5 -16   2    7.14    0.60
  16  -6  -2    0.28    0.34
  -6 -16  -2    1.18    0.49
   6  16  -2    0.61    0.38
 -16   6  -2    0.88    0.36
   6  16   2    0.22    0.36
  -6 -16   2    0.95    0.44
 -16   6   2    1.05    0.43
   7  16  -2   26.95    1.13
 -16   7  -2   25.70    1.05
  16  -7  -2   25.35    1.04
  -7 -16  -2   24.74    1.19
  -7 -16   2   22.73    1.17
 -16   7   2   26.59    1.13
   7  16   2   24.65    1.06
   8  16  -2    9.21    0.77
  -8 -16  -2    8.87    0.73
 -16   8  -2    8.94    0.74
  -8 -16   2    7.33    0.67
 -16   8   2    8.08    0.64
   8  16   2    7.23    0.58
   9  16  -2    2.10    0.49
  -9 -16  -2    2.46    0.59
 -16   9  -2    2.28    0.45
  -9 -16   2    1.35    0.50
   9  16   2    1.16    0.42
 -16   9   2    1.18    0.46
 -16  10  -2   30.88    1.24
 -10 -16  -2   32.08    1.39
  10  16  -2   31.44    1.31
  10  16   2   30.57    1.28
 -10 -16   2   30.16    1.38
 -16  10   2   31.39    1.32
 -16  11  -2    3.94    0.54
 -11 -16  -2    5.30    0.67
  11  16  -2    5.47    0.60
 -11 -16   2    4.39    0.65
 -16  11   2    5.03    0.62
 -12 -16  -2   33.40    1.52
  12  16  -2   34.03    1.42
 -16  12  -2   32.30    1.34
 -16  12   2   32.85    1.43
 -12 -16   2   33.92    1.49
 -13 -16  -2    1.44    0.62
 -16  13  -2    0.99    0.51
  13  16  -2    1.66    0.55
 -16  13   2    2.11    0.60
 -13 -16   2    1.98    0.58
 -11  17  -2    0.70    0.46
 -17 -11  -2   -0.53    0.52
  17  11  -2    0.49    0.46
 -17 -11   2    0.50    0.56
 -11  17   2    0.10    0.45
  17  10  -2    0.16    0.43
 -17 -10  -2    0.43    0.52
 -10  17  -2   -0.46    0.41
 -17 -10   2   -0.04    0.49
 -10  17   2   -0.17    0.44
  17   9  -2    2.51    0.50
 -17  -9  -2    3.39    0.57
  -9  17  -2    2.14    0.49
 -17  -9   2    2.82    0.59
  -9  17   2    2.66    0.52
  17   8  -2   20.03    1.03
 -17  -8  -2   18.86    1.11
  -8  17  -2   18.66    1.01
   8 -17  -2   20.12    1.03
  -8  17   2   20.97    1.06
 -17  -8   2   18.03    1.10
 -17  -7  -2   46.18    1.66
  -7  17  -2   46.86    1.62
  17   7  -2   46.33    1.61
   7 -17  -2   46.63    1.60
 -17  -7   2   48.09    1.69
  -7  17   2   46.03    1.62
 -17  -6  -2    5.20    0.58
  -6  17  -2    5.03    0.55
  17   6  -2    5.17    0.54
   6 -17  -2    6.48    0.60
  -6  17   2    5.95    0.57
 -17  -6   2    6.21    0.63
  17   5  -2    7.81    0.62
   5 -17  -2    6.37    0.56
 -17  -5  -2    7.29    0.64
  -5  17  -2    7.51    0.62
  -5  17   2    6.98    0.62
 -17  -5   2    7.47    0.66
  17   4  -2    1.60    0.39
   4 -17  -2    1.28    0.42
  -4  17  -2    1.22    0.44
 -17  -4  -2    0.26    0.40
  -4  17   2    0.88    0.45
 -17  -4   2    1.36    0.47
 -17  -3  -2   32.45    1.25
  17   3  -2   33.14    1.23
  -3  17  -2   32.81    1.24
   3 -17  -2   31.46    1.23
 -17  -3   2   32.43    1.28
  -3  17   2   32.50    1.26
  -2  17  -2    0.79    0.40
  17   2  -2    0.72    0.38
 -17  -2  -2    0.40    0.38
   2 -17  -2    0.36    0.37
 -17  -2   2    0.92    0.41
  -2  17   2    0.22    0.41
  17   1  -2   46.57    1.54
  -1  17  -2   45.96    1.57
   1 -17  -2   45.48    1.58
 -17  -1  -2   47.42    1.55
 -17  -1   2   48.20    1.60
  -1  17   2   44.84    1.56
   0 -17  -2    2.23    0.45
 -17   0  -2    1.98    0.42
   0  17  -2    1.63    0.44
  17   0  -2    1.76    0.41
   0  17   2    1.66    0.41
 -17   0   2    2.04    0.45
   1  17  -2    6.75    0.58
  -1 -17  -2    7.81    0.65
  17  -1  -2    7.72    0.57
 -17   1  -2    6.04    0.53
   1  17   2    7.16    0.58
 -17   1   2    6.78    0.60
  -1 -17   2    6.94    0.58
  17  -2  -2   34.38    1.25
   2  17  -2   36.17    1.34
 -17   2  -2   35.26    1.26
  -2 -17  -2   35.35    1.36
   2  17   2   35.33    1.30
 -17   2   2   34.86    1.33
  -2 -17   2   35.11    1.30
  17  -3  -2    0.61    0.38
  -3 -17  -2    0.44    0.44
   3  17  -2    1.16    0.42
 -17   3  -2    0.59    0.38
  -3 -17   2    1.06    0.42
   3  17   2    0.91    0.38
 -17   3   2    0.91    0.44
  -4 -17  -2    1.83    0.48
   4  17  -2    2.17    0.46
  17  -4  -2    2.62    0.43
 -17   4  -2    3.25    0.46
 -17   4   2    3.57    0.52
  -4 -17   2    2.50    0.48
   4  17   2    2.83    0.45
  17  -5  -2    1.33    0.41
 -17   5  -2    0.69    0.37
  -5 -17  -2    1.98    0.52
   5  17  -2    1.32    0.45
  -5 -17   2    1.27    0.45
   5  17   2    1.26    0.40
 -17   5   2    0.73    0.43
 -17   6  -2    4.08    0.49
   6  17  -2    4.53    0.55
  -6 -17  -2    4.63    0.60
 -17   6   2    4.34    0.54
   6  17   2    5.05    0.53
  -6 -17   2    4.37    0.59
  -7 -17  -2    0.96    0.52
 -17   7  -2    0.50    0.41
   7  17  -2    0.82    0.45
   7  17   2    0.38    0.40
 -17   7   2    0.85    0.46
  -7 -17   2    1.23    0.51
  -8 -17  -2    0.31    0.52
 -17   8  -2    0.45    0.41
   8  17  -2    1.01    0.45
 -17   8   2    0.64    0.47
   8  17   2    1.11    0.43
  -8 -17   2    0.72    0.51
   9  17  -2   12.81    0.95
  -9 -17  -2   12.67    1.05
 -17   9  -2   12.08    0.90
   9  17   2   13.79    0.87
 -17   9   2   12.93    0.95
  -9 -17   2   13.49    1.06
  10  17  -2    1.46    0.52
 -10 -17  -2    1.46    0.57
 -17  10  -2    0.87    0.45
 -10 -17   2    1.12    0.53
 -17  10   2    1.36    0.54
 -17  11  -2   51.41    1.75
  11  17  -2   49.84    1.77
 -11 -17  -2   51.30    1.88
 -17  11   2   45.25    1.77
 -11 -17   2   50.29    1.87
 -18 -10  -2    2.97    0.62
 -10  18  -2    3.87    0.57
 -18 -10   2    3.99    0.65
 -10  18   2    5.12    0.67
 -18  -9  -2    0.06    0.53
  -9  18  -2    0.34    0.45
 -18  -9   2   -0.26    0.53
  -9  18   2   -0.11    0.49
 -18  -8  -2    3.80    0.60
  -8  18  -2    3.35    0.54
 -18  -8   2    3.88    0.62
  -8  18   2    5.44    0.64
  -7  18  -2   12.04    0.94
  18   7  -2   12.90    0.93
 -18  -7  -2   12.01    1.00
  -7  18   2   13.30    0.95
 -18  -7   2   11.73    1.00
   6 -18  -2   16.69    1.00
  -6  18  -2   16.07    1.02
 -18  -6  -2   16.04    1.05
  18   6  -2   17.16    0.99
  -6  18   2   15.86    1.00
 -18  -6   2   17.04    1.06
  18   5  -2    0.44    0.44
   5 -18  -2   -0.24    0.40
  -5  18  -2    0.27    0.45
 -18  -5  -2   -0.05    0.45
  -5  18   2    0.01    0.46
 -18  -5   2    0.46    0.47
 -18  -4  -2    0.83    0.45
  -4  18  -2    1.71    0.48
   4 -18  -2    0.49    0.41
  18   4  -2    1.29    0.43
 -18  -4   2    0.87    0.46
  -4  18   2    1.17    0.49
  -3  18  -2    4.18    0.51
  18   3  -2    5.10    0.53
   3 -18  -2    4.61    0.52
 -18  -3  -2    5.10    0.55
  -3  18   2    5.41    0.59
 -18  -3   2    4.74    0.57
 -18  -2  -2   10.17    0.84
   2 -18  -2    9.99    0.81
  18   2  -2   10.00    0.79
  -2  18  -2   10.19    0.73
 -18  -2   2   10.74    0.76
  -2  18   2    8.48    0.67
   1 -18  -2   23.84    1.13
 -18  -1  -2   25.48    1.11
  -1  18  -2   23.43    1.11
  18   1  -2   23.89    1.08
  -1  18   2   24.75    1.12
 -18  -1   2   25.88    1.14
 -18   0  -2    9.23    0.65
   0 -18  -2    7.04    0.62
  18   0  -2    7.28    0.60
   0  18  -2    8.80    0.68
   0  18   2    8.09    0.62
 -18   0   2    7.91    0.65
 -18   1  -2    2.85    0.48
  18  -1  -2    2.45    0.46
   1  18  -2    2.55    0.51
  -1 -18  -2    3.12    0.52
 -18   1   2    2.04    0.49
   1  18   2    2.73    0.48
 -18   2  -2    0.29    0.40
   2  18  -2    0.38    0.45
  -2 -18  -2    0.72    0.49
   2  18   2    0.08    0.41
 -18   2   2    1.34    0.49
  -3 -18  -2   25.69    1.23
   3  18  -2   25.40    1.19
 -18   3  -2   26.50    1.12
   3  18   2   28.54    1.17
 -18   3   2   26.70    1.20
 -18   4  -2   17.97    0.97
   4  18  -2   18.36    1.02
  -4 -18  -2   19.01    1.11
 -18   4   2   17.98    1.02
   4  18   2   19.45    0.98
  -5 -18  -2    0.02    0.48
 -18   5  -2   -0.10    0.40
   5  18  -2   -0.35    0.42
   5  18   2    0.00    0.40
 -18   5   2    0.26    0.45
  -6 -18  -2   12.21    1.00
   6  18  -2    9.53    0.73
 -18   6  -2    9.89    0.83
 -18   6   2    8.32    0.68
   6  18   2   11.87    0.85
   7  18  -2    0.48    0.49
 -18   7  -2   -0.47    0.41
  -7 -18  -2    0.08    0.52
 -18   7   2    0.06    0.46
   7  18   2   -0.12    0.40
  -8 -18  -2    0.66    0.58
   8  18  -2    0.41    0.47
 -18   8  -2    0.40    0.45
   8  18   2    0.48    0.45
 -18   8   2    0.60    0.51
 -18   9  -2    2.04    0.50
  -9 -18  -2    2.53    0.65
   9  18  -2    1.83    0.53
 -18   9   2    1.45    0.54
  10  18  -2   32.12    1.40
 -10 -18  -2   33.02    1.54
 -18  10  -2   30.61    1.35
 -18  10   2   29.85    1.41
  -8  19  -2    0.02    0.47
 -19  -8  -2    0.49    0.54
  -8  19   2   -0.29    0.49
 -19  -8   2    0.67    0.59
  -7  19  -2    5.71    0.66
 -19  -7  -2    5.23    0.67
  -7  19   2    4.78    0.62
 -19  -7   2    5.06    0.68
 -19  -6  -2   -0.39    0.49
  -6  19  -2   -0.10    0.49
 -19  -6   2    0.30    0.52
  -6  19   2    0.42    0.49
  -5  19  -2   -0.27    0.47
 -19  -5  -2    0.26    0.50
  -5  19   2    0.01    0.48
 -19  -5   2    1.35    0.53
 -19  -4  -2    0.70    0.49
  -4  19  -2    0.61    0.49
   4 -19  -2    0.82    0.48
 -19  -4   2    0.81    0.51
  -4  19   2    0.45    0.48
 -19  -3  -2    0.05    0.44
   3 -19  -2   -0.06    0.42
  -3  19  -2    0.12    0.47
  -3  19   2    0.39    0.48
 -19  -3   2    0.07    0.46
 -19  -2  -2   16.33    1.01
   2 -19  -2   17.19    1.02
  -2  19  -2   16.40    1.02
 -19  -2   2   18.74    1.07
  -2  19   2   16.99    1.04
   1 -19  -2    0.28    0.46
 -19  -1  -2    0.44    0.44
  -1  19  -2    0.51    0.49
  -1  19   2    0.24    0.46
 -19  -1   2    0.43    0.46
   0 -19  -2    8.98    0.73
   0  19  -2    9.31    0.72
 -19   0  -2   10.54    0.83
 -19   0   2    8.28    0.70
   0  19   2    9.94    0.75
   1  19  -2    0.00    0.47
 -19   1  -2   -0.08    0.41
  -1 -19  -2   -0.12    0.47
   1  19   2   -0.35    0.42
 -19   1   2   -0.17    0.45
 -19   2  -2    8.18    0.66
   2  19  -2    6.89    0.67
  -2 -19  -2    7.12    0.69
 -19   2   2    7.74    0.67
   2  19   2    8.17    0.67
   3  19  -2   16.49    1.03
  -3 -19  -2   15.68    1.07
 -19   3  -2   16.33    0.98
 -19   3   2   15.93    1.03
   3  19   2   17.41    0.97
   4  19  -2    3.59    0.55
 -19   4  -2    3.04    0.52
  -4 -19  -2    2.81    0.60
 -19   4   2    3.68    0.58
   4  19   2    3.25    0.52
   5  19  -2   22.79    1.18
  -5 -19  -2   22.51    1.28
 -19   5  -2   23.25    1.13
 -19   5   2   21.60    1.19
   5  19   2   21.88    1.12
  -6 -19  -2    1.74    0.59
 -19   6  -2    1.51    0.50
   6  19  -2    1.39    0.52
   6  19   2    2.54    0.51
 -19   6   2    2.05    0.55
   7  19  -2    0.75    0.54
  -7 -19  -2    0.36    0.58
 -19   7  -2    0.47    0.48
   7  19   2   -0.18    0.45
 -19   7   2   -0.07    0.49
 -19   8  -2    6.07    0.68
   8  19  -2    7.60    0.74
  -8 -19  -2    6.93    0.80
 -19   8   2    6.89    0.72
 -20  -5  -2    9.81    0.79
  -5  20  -2    9.00    0.77
  -5  20   2    9.02    0.76
 -20  -5   2   10.25    0.84
 -20  -4  -2    5.87    0.67
  -4  20  -2    4.29    0.62
 -20  -4   2    4.79    0.68
  -4  20   2    4.82    0.67
 -20  -3  -2    0.79    0.52
  -3  20  -2    0.81    0.52
 -20  -3   2    1.49    0.55
  -3  20   2    0.99    0.54
  -2  20  -2   14.46    1.02
   2 -20  -2   14.08    1.01
 -20  -2  -2   15.77    1.01
  -2  20   2   12.64    1.02
 -20  -2   2   13.72    1.06
  -1  20  -2   12.65    0.97
   1 -20  -2    9.59    0.78
 -20  -1  -2    8.87    0.72
 -20  -1   2    8.90    0.74
  -1  20   2   10.51    0.79
   0 -20  -2    4.63    0.64
 -20   0  -2    4.80    0.61
   0  20  -2    4.78    0.62
 -20   0   2    4.12    0.60
   0  20   2    4.02    0.59
 -20   1  -2    0.83    0.49
   1  20  -2    0.07    0.48
  -1 -20  -2    0.58    0.50
 -20   1   2    0.43    0.52
   1  20   2    0.07    0.46
  -2 -20  -2   24.06    1.25
 -20   2  -2   21.32    1.15
   2  20  -2   23.18    1.25
 -20   2   2   23.59    1.23
   2  20   2   23.86    1.17
  -3 -20  -2    0.15    0.53
   3  20  -2    0.73    0.54
 -20   3  -2    0.42    0.48
   3  20   2    0.24    0.49
 -20   3   2    0.24    0.53
   4  20  -2   74.90    2.36
  -4 -20  -2   72.57    2.41
 -20   4  -2   74.12    2.29
   4  20   2   72.01    2.30
 -20   4   2   71.67    2.36
   5  20  -2   -0.22    0.50
 -20   5  -2    0.12    0.49
  -5 -20  -2   -0.13    0.57
   5  20   2   -0.50    0.48
 -20   5   2   -0.61    0.51
   0   0  -3  419.94   10.70
   0   0  -3  429.43   10.72
   0   0   3  433.87   10.66
   0   0   3  431.11   10.69
   0  -1  -3   59.09    1.55
  -1   0  -3   60.94    1.53
   0   1  -3   60.94    1.54
  -1   0  -3   60.21    1.53
   1   0  -3   62.00    1.56
   1   0  -3   60.18    1.56
   0  -1  -3   61.71    1.55
   0   1  -3   60.95    1.55
   0   1   3   61.57    1.55
   0  -1   3   63.68    1.53
  -1   0   3   62.87    1.55
  -1   0   3   60.40    1.56
   0   1   3   62.41    1.55
   0  -1   3   62.68    1.53
   1  -1  -3   90.19    2.25
  -1  -1  -3   90.03    2.23
  -1  -1  -3   89.34    2.23
   1   1  -3   89.99    2.25
   1  -1  -3   87.87    2.25
   1   1  -3   87.97    2.24
   1   1   3   91.95    2.23
  -1  -1   3   88.14    2.25
  -1   1   3   88.96    2.25
   1  -2  -3   29.05    0.80
  -2  -1  -3   30.29    0.78
   2   1  -3   29.39    0.80
  -1   2  -3   30.32    0.77
  -2  -1  -3   30.73    0.77
   1  -2  -3   30.20    0.80
   2   1  -3   29.48    0.81
  -1   2  -3   30.80    0.77
   2   1   3   29.88    0.76
  -1   2   3   30.48    0.80
  -2  -1   3   29.46    0.81
   2   1   3   30.76    0.77
   0   2  -3    9.80    0.29
   0  -2  -3    9.83    0.30
   2   0  -3    9.93    0.31
  -2   0  -3    9.64    0.26
   0  -2  -3    9.81    0.30
   2   0  -3    9.45    0.31
  -2   0  -3    9.60    0.26
   0   2  -3   10.05    0.29
  -2   0   3    9.51    0.31
   0   2   3    9.94    0.30
   0  -2   3    9.87    0.27
   0  -2   3   10.20    0.27
   2  -1  -3   14.99    0.45
  -1  -2  -3   15.52    0.43
   1   2  -3   15.01    0.44
   1   2  -3   16.12    0.45
  -1  -2  -3   15.45    0.44
   2  -1  -3   14.72    0.45
   1   2   3   14.67    0.42
  -1  -2   3   15.95    0.44
  -2   1   3   15.21    0.45
   2  -2  -3    3.95    0.19
  -2  -2  -3    4.20    0.18
  -2   2  -3    4.10    0.13
   2   2  -3    4.45    0.20
  -2  -2  -3    4.22    0.17
  -2   2  -3    4.32    0.13
   2  -2  -3    3.99    0.19
   2   2  -3    4.15    0.19
  -2   2   3    4.07    0.19
   2   2   3    4.12    0.16
  -2  -2   3    3.83    0.19
   3   2  -3  185.32    4.49
   2  -3  -3  187.36    4.48
  -3  -2  -3  174.40    4.52
   2  -3  -3  177.25    4.47
  -3  -2  -3  180.49    4.45
   3   2  -3  171.51    4.47
  -2   3  -3  180.49    4.47
  -2   3  -3  174.29    4.48
   3   2   3  179.96    4.47
   2  -3   3  183.60    4.45
  -3  -2   3  175.01    4.48
  -2   3   3  170.41    4.47
   1  -3  -3   33.05    0.87
   3   1  -3   31.20    0.87
  -1   3  -3   32.97    0.84
  -3  -1  -3   33.06    0.84
   1  -3  -3   31.32    0.87
  -3  -1  -3   31.13    0.84
   3   1  -3   33.02    0.88
  -1   3  -3   32.71    0.84
   1  -3   3   32.88    0.82
   3   1   3   32.19    0.82
  -1   3   3   31.99    0.86
  -3  -1   3   31.89    0.88
   0  -3  -3    0.78    0.10
   3   0  -3    1.21    0.12
   0  -3  -3    0.88    0.10
   0   3  -3    1.18    0.10
   0   3  -3    1.55    0.13
   3   0  -3    1.17    0.11
  -3   0  -3    1.19    0.09
  -3   0  -3    1.18    0.08
   0  -3   3    1.29    0.10
   0   3   3    1.29    0.10
  -3   1  -3    2.59    0.10
  -1  -3  -3    2.44    0.17
   3  -1  -3    2.31    0.17
   1   3  -3    2.60    0.16
   1   3  -3    2.35    0.16
  -3   1  -3    2.51    0.10
  -1  -3  -3    2.73    0.16
   3  -1  -3    2.58    0.17
  -3   1   3    2.92    0.18
   1   3   3    2.53    0.15
  -1  -3   3    2.63    0.15
   3  -2  -3   51.38    1.35
   3  -2  -3   52.48    1.35
  -3   2  -3   52.42    1.30
   2   3  -3   49.94    1.35
  -2  -3  -3   53.84    1.34
   2   3  -3   53.44    1.36
  -2  -3  -3   50.28    1.34
  -3   2  -3   52.65    1.30
   2   3   3   50.83    1.33
  -3   2   3   48.37    1.35
  -2  -3   3   50.52    1.35
  -3  -3  -3   82.81    2.11
   3   3  -3   88.28    2.15
  -3  -3  -3   81.26    2.12
   3   3  -3   79.52    2.13
   3  -3  -3   83.53    2.13
  -3   3  -3   85.71    2.08
  -3   3  -3   82.03    2.08
   3  -3  -3   86.14    2.13
   3   3   3   81.24    2.10
   3  -3   3   86.07    2.06
  -3  -3   3   76.41    2.14
  -3   3   3   80.80    2.13
   3  -4  -3  552.80   13.49
  -4  -3  -3  515.47   13.43
  -4  -3  -3  546.86   13.39
   3  -4  -3  506.40   13.41
   4   3  -3  552.47   13.57
  -3   4  -3  551.00   13.43
  -3   4  -3  549.80   13.43
   4   3  -3  508.35   13.60
  -4  -3   3  510.07   13.50
   3  -4   3  562.39   13.38
   4   3   3  544.94   13.47
  -3   4   3  522.40   13.43
   4   2  -3   22.13    0.67
  -4  -2  -3   24.21    0.65
  -2   4  -3   22.71    0.63
   2  -4  -3   22.25    0.67
   4   2  -3   24.30    0.70
  -2   4  -3   23.91    0.63
  -4  -2  -3   22.56    0.66
   2  -4  -3   24.10    0.68
   4   2   3   23.41    0.63
  -2   4   3   22.80    0.67
   2  -4   3   24.33    0.62
  -4  -2   3   22.54    0.69
   4   1  -3  348.55    8.69
   4   1  -3  322.84    8.64
  -4  -1  -3  333.31    8.46
  -1   4  -3  338.25    8.48
  -4  -1  -3  343.89    8.71
   1  -4  -3  354.64    8.50
   1  -4  -3  334.23    8.66
  -1   4  -3  321.34    8.51
  -4  -1   3  336.77    8.69
   1  -4   3  334.98    8.47
  -1   4   3  329.66    8.37
   4   1   3  341.48    8.41
   0  -4  -3    5.25    0.25
   0   4  -3    5.64    0.23
  -4   0  -3    5.48    0.20
   0   4  -3    5.82    0.24
   0  -4  -3    5.90    0.25
   4   0  -3    5.87    0.26
   4   0  -3    5.47    0.26
  -4   0  -3    5.62    0.20
   0  -4   3    5.51    0.21
   0   4   3    5.80    0.24
   4   0   3    5.54    0.17
  -4   0   3    5.22    0.25
  -1  -4  -3   35.25    0.93
   4  -1  -3   32.10    0.93
  -4   1  -3   33.08    0.88
   1   4  -3   35.26    0.93
   4  -1  -3   38.93    0.94
  -4   1  -3   33.95    0.88
  -1  -4  -3   31.83    0.92
   1   4  -3   33.17    0.92
   1   4   3   32.81    0.91
   4  -1   3   33.90    0.85
  -4   1   3   32.35    0.93
  -1  -4   3   33.40    0.92
   2   4  -3   52.99    1.37
   4  -2  -3   52.50    1.36
   4  -2  -3   48.27    1.35
  -4   2  -3   49.01    1.30
   2   4  -3   49.80    1.35
  -2  -4  -3   48.59    1.35
  -2  -4  -3   53.58    1.35
  -4   2  -3   51.07    1.30
  -2  -4   3   50.24    1.36
   2   4   3   51.08    1.33
   4  -2   3   50.84    1.28
  -3  -4  -3    2.95    0.22
  -3  -4  -3    3.06    0.19
   3   4  -3    2.50    0.22
   3   4  -3    2.61    0.22
  -4   3  -3    2.95    0.15
  -4   3  -3    3.12    0.15
   4  -3  -3    3.31    0.22
   4  -3  -3    2.96    0.22
  -3  -4   3    2.85    0.23
  -4   3   3    3.87    0.23
   4  -3   3    2.94    0.12
   3   4   3    3.27    0.18
   4   4  -3   27.01    0.82
  -4  -4  -3   27.58    0.82
  -4  -4  -3   29.64    0.81
  -4   4  -3   29.58    0.77
   4   4  -3   30.30    0.85
  -4   4  -3   27.44    0.77
   4  -4  -3   27.70    0.82
  -4  -4   3   26.98    0.83
   4   4   3   28.67    0.79
   4  -4   3   28.94    0.75
  -4   4   3   27.56    0.82
  -4   5  -3  293.58    7.53
  -5  -4  -3  314.15    7.52
   4  -5  -3  292.84    7.52
  -4   5  -3  314.21    7.48
  -5  -4  -3  291.30    7.52
   5   4  -3  289.76    7.52
  -4   5   3  304.83    7.52
   4  -5   3  308.93    7.57
   5   4   3  296.46    7.49
  -5  -4   3  297.14    7.55
  -3   5  -3  200.57    4.89
  -3   5  -3  191.67    4.89
  -5  -3  -3  191.05    4.92
  -5  -3  -3  197.74    4.92
   5   3  -3  190.34    4.93
   3  -5  -3  189.11    4.93
   5   3  -3  203.97    4.96
  -3   5   3  195.98    4.93
  -5  -3   3  193.68    4.95
   3  -5   3  201.58    4.92
   5   3   3  194.75    4.89
  -5  -2  -3  907.80   23.58
   2  -5  -3  946.19   23.72
  -5  -2  -3  954.56   23.52
   5   2  -3  915.12   23.69
  -2   5  -3  956.35   23.48
  -2   5  -3  914.63   23.50
   5   2  -3  981.26   23.79
   2  -5  -3  976.66   23.69
   5   2   3  935.15   23.43
  -2   5   3  928.79   23.62
   2  -5   3  931.54   23.41
  -5  -2   3  912.37   23.75
   5   1  -3  167.95    4.04
   1  -5  -3  157.23    4.02
  -5  -1  -3  163.63    3.99
  -1   5  -3  154.14    4.00
  -5  -1  -3  154.79    3.99
  -1   5  -3  163.05    4.00
   1  -5  -3  164.66    4.02
   5   1  -3  152.55    4.02
   5   1   3  160.40    3.97
  -1   5   3  158.27    4.01
  -5  -1   3  151.70    4.03
   1  -5   3  160.94    3.98
  -5   0  -3  127.92    3.21
   0   5  -3  125.64    3.23
   0   5  -3  132.63    3.24
   5   0  -3  120.89    3.25
   0  -5  -3  134.04    3.25
   5   0  -3  130.18    3.26
  -5   0  -3  129.15    3.21
   0  -5  -3  124.01    3.25
   0   5   3  123.55    3.24
  -5   0   3  126.35    3.25
   5   0   3  129.63    3.19
   0  -5   3  128.12    3.22
  -1  -5  -3   16.33    0.53
   1   5  -3   17.22    0.52
   5  -1  -3   16.27    0.53
  -5   1  -3   16.05    0.47
  -5   1  -3   16.41    0.47
  -1  -5  -3   16.96    0.52
   1   5  -3   16.71    0.52
   1   5   3   16.19    0.51
  -1  -5   3   16.86    0.50
   5  -1   3   16.36    0.45
  -5   1   3   15.74    0.52
   2   5  -3   94.75    2.48
   5  -2  -3   96.78    2.48
   2   5  -3  102.00    2.49
  -2  -5  -3   93.37    2.47
  -5   2  -3   97.92    2.43
  -2  -5  -3   94.78    2.47
   5  -2   3   98.45    2.41
  -5   2   3   94.70    2.48
   2   5   3   94.11    2.46
  -2  -5   3   94.93    2.48
  -3  -5  -3   33.53    0.97
  -5   3  -3   34.85    0.91
  -5   3  -3   33.98    0.91
   5  -3  -3   34.15    0.97
   3   5  -3   33.90    0.97
   3   5  -3   36.76    0.99
  -3  -5  -3   35.55    0.96
  -3  -5   3   32.60    0.98
   5  -3   3   35.12    0.90
   3   5   3   34.80    0.95
  -5   3   3   33.44    0.97
   4   5  -3    8.09    0.37
  -5   4  -3    8.79    0.29
  -5   4  -3    8.16    0.30
   4   5  -3    7.82    0.37
  -4  -5  -3    8.55    0.35
   5  -4  -3    7.95    0.36
  -4  -5  -3    8.04    0.36
  -5   4   3    7.27    0.35
   4   5   3    7.76    0.32
   5  -4   3    8.60    0.27
  -4  -5   3    8.08    0.38
  -5  -5  -3   73.47    1.84
  -5   5  -3   69.37    1.79
   5  -5  -3   64.44    1.83
  -5  -5  -3   67.34    1.85
   5   5  -3   66.60    1.85
  -5   5  -3   73.19    1.80
  -5   5   3   69.70    1.84
  -5  -5   3   67.93    1.87
   5   5   3   69.84    1.82
   5  -5   3   70.04    1.77
  -6  -5  -3   12.91    0.48
   5  -6  -3   12.30    0.49
  -5   6  -3   12.97    0.43
  -6  -5  -3   12.35    0.50
   6   5  -3   12.39    0.49
  -5   6  -3   12.48    0.44
   5  -6   3   13.10    0.41
  -5   6   3   12.80    0.49
   6   5   3   12.29    0.44
  -4   6  -3    9.09    0.35
  -6  -4  -3    9.66    0.39
  -6  -4  -3    9.28    0.40
   4  -6  -3    8.72    0.40
   6   4  -3    8.64    0.41
  -4   6  -3    9.81    0.35
  -6  -4   3    9.17    0.42
  -4   6   3    9.00    0.40
   6   4   3    9.13    0.35
   4  -6   3    9.26    0.31
   6   3  -3  576.00   14.62
  -3   6  -3  601.11   14.60
  -3   6  -3  573.27   14.57
  -6  -3  -3  591.92   14.57
   3  -6  -3  573.98   14.71
  -6  -3  -3  553.02   14.64
   6   3   3  573.50   14.51
  -3   6   3  556.93   14.40
  -6  -3   3  557.59   14.54
   3  -6   3  599.36   14.44
   6   2  -3   41.58    1.19
   2  -6  -3   41.34    1.18
  -6  -2  -3   41.13    1.16
  -6  -2  -3   44.22    1.16
  -2   6  -3   43.99    1.15
  -2   6  -3   44.32    1.15
  -2   6   3   42.34    1.18
   2  -6   3   41.99    1.13
  -6  -2   3   39.63    1.19
   6   2   3   44.24    1.13
  -6  -1  -3  467.19   11.79
  -6  -1  -3  470.58   11.76
  -1   6  -3  442.40   11.70
   1  -6  -3  455.99   11.66
   6   1  -3  470.27   11.87
  -1   6  -3  484.61   11.79
  -6  -1   3  474.55   11.88
  -1   6   3  447.28   11.70
   1  -6   3  459.91   11.78
   6   1   3  470.00   11.66
  -6   0  -3   35.44    0.98
   6   0  -3   35.14    1.02
   0  -6  -3   36.32    1.02
  -6   0  -3   37.37    0.98
   0  -6  -3   35.27    1.02
   0   6  -3   34.71    1.00
   0   6  -3   38.83    1.01
   0  -6   3   37.39    0.99
  -6   0   3   35.42    1.02
   0   6   3   35.94    1.01
   6   0   3   36.72    0.96
  -6   1  -3    2.92    0.20
  -6   1  -3    2.44    0.18
  -1  -6  -3    2.77    0.22
   6  -1  -3    2.16    0.19
   1   6  -3    2.52    0.20
  -1  -6  -3    2.21    0.19
   1   6  -3    2.88    0.23
   1   6   3    2.85    0.24
  -6   1   3    3.33    0.26
  -1  -6   3    2.92    0.22
   6  -1   3    2.80    0.16
  -2  -6  -3    5.64    0.30
   6  -2  -3    4.72    0.31
   2   6  -3    5.98    0.30
   2   6  -3    5.88    0.31
  -2  -6  -3    4.71    0.31
  -6   2  -3    5.33    0.24
  -6   2  -3    5.43    0.23
   2   6   3    5.74    0.29
   6  -2   3    5.28    0.22
  -2  -6   3    5.80    0.30
  -6   2   3    5.84    0.31
  -6   3  -3   39.22    1.06
   3   6  -3   40.50    1.13
  -3  -6  -3   40.09    1.11
  -3  -6  -3   39.02    1.12
  -6   3  -3   40.76    1.06
   6  -3  -3   38.27    1.11
   3   6  -3   39.26    1.12
   6  -3   3   40.70    1.04
  -6   3   3   39.69    1.12
  -3  -6   3   40.86    1.13
   3   6   3   39.20    1.10
   4   6  -3   13.81    0.52
   6  -4  -3   14.59    0.52
  -4  -6  -3   14.13    0.53
  -4  -6  -3   14.70    0.51
  -6   4  -3   14.19    0.46
  -6   4  -3   14.89    0.45
   6  -4   3   15.01    0.43
   4   6   3   13.53    0.48
  -6   4   3   14.19    0.51
  -4  -6   3   14.42    0.54
   5   6  -3    0.18    0.15
  -5  -6  -3    0.07    0.16
  -6   5  -3    0.10    0.10
   6  -5  -3    0.10    0.15
  -5  -6  -3   -0.05    0.13
  -6   5  -3    0.04    0.11
  -6   5   3    0.07    0.14
   6  -5   3    0.04    0.08
  -5  -6   3    0.25    0.17
   5   6   3    0.02    0.12
  -6   6  -3   16.12    0.50
  -6  -6  -3   14.49    0.58
   6   6  -3   14.10    0.56
  -6  -6  -3   16.12    0.56
  -6   6  -3   14.20    0.50
  -6   6   3   14.36    0.56
  -6  -6   3   14.93    0.59
   6   6   3   14.09    0.52
   6  -6   3   15.28    0.47
   7   6  -3   24.66    0.83
  -6   7  -3   24.21    0.76
  -6   7  -3   26.34    0.76
  -7  -6  -3   28.09    0.86
  -7  -6  -3   24.22    0.83
   6  -7  -3   24.24    0.81
  -7  -6   3   23.91    0.85
   7   6   3   25.04    0.78
  -6   7   3   23.68    0.81
   6  -7   3   26.03    0.73
   5  -7  -3    0.64    0.17
  -5   7  -3    0.79    0.16
  -5   7  -3    1.15    0.15
  -7  -5  -3    0.86    0.20
  -7  -5  -3    0.98    0.18
   7   5  -3    1.31    0.21
  -5   7   3    0.94    0.19
   7   5   3    0.87    0.15
   5  -7   3    1.02    0.12
  -7  -5   3    0.88    0.20
  -7  -4  -3   50.40    1.42
  -4   7  -3   53.57    1.38
   7   4  -3   50.79    1.43
  -4   7  -3   50.49    1.38
  -7  -4  -3   52.56    1.41
   4  -7  -3   50.24    1.42
   4  -7   3   51.33    1.35
  -7  -4   3   50.11    1.45
  -4   7   3   51.47    1.42
   7   4   3   51.76    1.38
  -7  -3  -3   27.36    0.77
   7   3  -3   25.01    0.80
  -7  -3  -3   24.19    0.77
  -3   7  -3   24.26    0.75
  -3   7  -3   26.04    0.74
   3  -7  -3   25.04    0.79
  -7  -3   3   25.61    0.81
   7   3   3   25.78    0.74
  -3   7   3   25.38    0.78
   3  -7   3   25.49    0.72
   2  -7  -3  255.53    6.46
  -2   7  -3  257.75    6.43
  -2   7  -3  263.91    6.43
  -7  -2  -3  268.52    6.44
  -7  -2  -3  242.50    6.44
   7   2  -3  251.92    6.46
  -2   7   3  259.24    6.46
  -7  -2   3  248.35    6.47
   7   2   3  261.01    6.41
   2  -7   3  257.33    6.41
  -1   7  -3   78.16    2.05
   7   1  -3   76.27    2.08
   1  -7  -3   77.04    2.08
  -7  -1  -3   79.40    2.04
  -7  -1  -3   81.46    2.05
  -1   7  -3   83.07    2.06
  -1   7   3   74.25    2.06
   1  -7   3   77.37    2.03
   7   1   3   80.15    2.02
   0   7  -3   31.08    0.94
  -7   0  -3   32.58    0.91
   0  -7  -3   31.67    0.96
   7   0  -3   32.33    0.95
  -7   0  -3   34.31    0.91
   0   7  -3   34.58    0.94
   0   7   3   32.38    0.94
  -7   0   3   32.49    0.96
   0  -7   3   33.16    0.92
   7   0   3   32.45    0.89
   7  -1  -3    8.34    0.40
   1   7  -3    9.97    0.38
  -7   1  -3    8.97    0.34
  -1  -7  -3    8.22    0.41
  -7   1  -3    9.17    0.33
   1   7  -3    9.29    0.39
  -1  -7   3    9.73    0.37
   7  -1   3    8.66    0.31
   1   7   3    8.62    0.38
  -7   1   3    9.06    0.40
  -7   2  -3    0.32    0.11
  -7   2  -3    0.39    0.10
   2   7  -3    0.26    0.14
  -2  -7  -3    0.10    0.15
   7  -2  -3    0.37    0.15
   2   7  -3    0.41    0.15
  -7   2   3    0.19    0.15
  -2  -7   3    0.21    0.14
   2   7   3    0.09    0.13
   7  -2   3    0.22    0.09
   7  -3  -3    3.45    0.26
  -7   3  -3    3.40    0.20
   3   7  -3    4.18    0.31
   3   7  -3    2.73    0.24
  -3  -7  -3    3.04    0.25
  -7   3  -3    3.59    0.23
   3   7   3    3.49    0.26
   7  -3   3    3.26    0.19
  -3  -7   3    3.70    0.30
   4   7  -3    3.86    0.28
  -7   4  -3    3.88    0.22
  -4  -7  -3    3.77    0.28
   7  -4  -3    3.85    0.31
  -7   4  -3    3.68    0.24
  -4  -7   3    3.75    0.28
  -7   4   3    3.72    0.30
   4   7   3    3.83    0.27
   7  -4   3    3.71    0.20
   7  -5  -3   19.17    0.65
  -7   5  -3   18.08    0.59
  -7   5  -3   19.40    0.58
  -5  -7  -3   18.67    0.67
   5   7  -3   18.90    0.66
  -7   5   3   17.98    0.64
   5   7   3   18.44    0.61
  -5  -7   3   17.47    0.67
   7  -5   3   18.51    0.55
  -6  -7  -3    7.66    0.45
  -7   6  -3    8.34    0.38
  -7   6  -3    8.91    0.35
   7  -6  -3    8.59    0.43
   6   7  -3    7.68    0.44
   6   7   3    7.76    0.39
  -7   6   3    8.51    0.44
  -6  -7   3    8.08    0.46
   7  -6   3    8.58    0.32
  -7  -7  -3   24.98    0.86
   7   7  -3   25.35    0.84
  -7   7  -3   24.97    0.78
   7  -7  -3   24.40    0.82
  -7   7  -3   25.89    0.77
  -7   7   3   24.99    0.83
   7  -7   3   24.39    0.73
  -7  -7   3   25.40    0.87
   7   7   3   25.06    0.79
  -8  -7  -3    0.24    0.22
   7  -8  -3    0.03    0.19
  -7   8  -3    0.18    0.15
  -7   8  -3    0.25    0.17
   8   7  -3    0.16    0.22
   7  -8   3    0.24    0.14
   8   7   3    0.21    0.17
  -8  -7   3    0.29    0.24
  -7   8   3    0.14    0.22
  -6   8  -3    2.65    0.23
  -8  -6  -3    2.98    0.29
   8   6  -3    2.88    0.29
   6  -8  -3    2.71    0.27
  -6   8  -3    2.83    0.23
  -8  -6   3    2.30    0.28
   6  -8   3    2.73    0.22
   8   6   3    2.88    0.24
  -6   8   3    2.30    0.27
   8   5  -3   26.35    0.89
   5  -8  -3   27.98    0.88
  -8  -5  -3   28.15    0.89
  -5   8  -3   29.14    0.83
  -5   8  -3   27.04    0.83
  -8  -5  -3   28.84    0.88
   5  -8   3   28.00    0.80
   8   5   3   27.28    0.83
  -8  -5   3   26.11    0.90
  -5   8   3   26.65    0.87
   4  -8  -3    0.09    0.17
  -4   8  -3    0.04    0.14
  -8  -4  -3    0.09    0.13
  -8  -4  -3    0.14    0.16
   8   4  -3    0.04    0.18
  -4   8  -3    0.09    0.12
  -4   8   3   -0.10    0.16
  -8  -4   3    0.14    0.19
   8   4   3    0.01    0.12
   4  -8   3    0.01    0.10
  -8  -3  -3   15.26    0.52
   8   3  -3   13.16    0.55
  -3   8  -3   15.41    0.50
   3  -8  -3   13.92    0.54
  -8  -3  -3   13.24    0.53
  -3   8  -3   13.88    0.51
  -3   8   3   15.41    0.55
   3  -8   3   14.62    0.47
   8   3   3   14.24    0.48
   8   2  -3    1.94    0.22
  -8  -2  -3    2.12    0.19
   2  -8  -3    1.69    0.21
  -2   8  -3    1.79    0.19
  -2   8  -3    1.76    0.18
  -8  -2  -3    2.05    0.21
  -8  -2   3    1.68    0.21
   2  -8   3    2.10    0.17
   8   2   3    2.15    0.17
  -2   8   3    2.08    0.22
  -8  -1  -3   11.08    0.41
   1  -8  -3   10.33    0.46
  -1   8  -3   12.16    0.44
   8   1  -3   10.57    0.46
  -1   8  -3   11.88    0.43
  -8  -1  -3   10.44    0.42
   1  -8   3    9.97    0.39
  -8  -1   3   11.36    0.46
   8   1   3   10.39    0.38
  -1   8   3   10.42    0.45
   0   8  -3   12.13    0.45
   0  -8  -3   11.15    0.48
  -8   0  -3   12.00    0.42
   0   8  -3   11.29    0.45
   8   0  -3   11.29    0.47
  -8   0  -3   10.87    0.42
   0  -8   3   12.01    0.43
   0   8   3   12.06    0.46
   8   0   3   11.57    0.39
  -8   0   3   11.83    0.48
   8  -1  -3    1.02    0.19
  -8   1  -3    1.16    0.14
   1   8  -3    1.19    0.18
  -8   1  -3    1.06    0.14
   1   8  -3    1.59    0.19
  -1  -8  -3    1.11    0.20
   8  -1   3    1.16    0.13
   1   8   3    1.38    0.19
  -1  -8   3    1.12    0.17
  -8   1   3    1.23    0.19
   8  -2  -3    1.73    0.21
   2   8  -3    2.38    0.23
  -8   2  -3    2.17    0.18
  -8   2  -3    2.46    0.20
  -2  -8  -3    1.65    0.22
   2   8  -3    2.64    0.25
  -8   2   3    1.62    0.20
  -2  -8   3    1.80    0.19
   2   8   3    1.79    0.19
   8  -2   3    2.34    0.18
   8  -3  -3   28.12    0.86
  -8   3  -3   27.95    0.80
  -3  -8  -3   27.02    0.88
  -8   3  -3   27.64    0.81
   3   8  -3   28.20    0.87
  -8   3   3   27.09    0.86
   3   8   3   27.55    0.84
  -3  -8   3   26.77    0.87
   8  -3   3   29.07    0.78
  -8   4  -3    1.42    0.15
   4   8  -3    1.06    0.20
  -8   4  -3    0.96    0.16
  -4  -8  -3    1.26    0.22
   8  -4  -3    1.96    0.23
  -4  -8   3    1.37    0.22
   4   8   3    1.19    0.17
   8  -4   3    1.32    0.14
  -8   4   3    1.13    0.21
  -8   5  -3   18.80    0.58
   5   8  -3   16.94    0.66
   8  -5  -3   16.52    0.64
  -8   5  -3   17.51    0.58
  -5  -8  -3   17.47    0.67
   8  -5   3   18.06    0.55
  -5  -8   3   16.47    0.67
   5   8   3   18.38    0.62
  -8   5   3   17.24    0.64
  -8   6  -3    2.45    0.22
   8  -6  -3    2.54    0.26
  -8   6  -3    2.44    0.20
  -6  -8  -3    2.14    0.27
   6   8  -3    2.10    0.26
   6   8   3    2.36    0.23
  -8   6   3    2.14    0.25
  -6  -8   3    3.15    0.32
   8  -6   3    2.67    0.19
   8  -7  -3   29.37    0.94
  -8   7  -3   28.02    0.88
  -7  -8  -3   28.40    0.97
   7   8  -3   28.17    0.96
  -8   7  -3   31.31    0.88
  -8   7   3   28.90    0.94
  -7  -8   3   28.29    0.98
   8  -7   3   28.63    0.84
   7   8   3   28.95    0.90
   8  -8  -3    1.82    0.28
   8   8  -3    1.08    0.26
  -8  -8  -3    1.33    0.29
  -8   8  -3    1.71    0.21
  -8   8  -3    1.86    0.24
   8  -8   3    1.62    0.18
  -8  -8   3    1.74    0.32
   8   8   3    2.17    0.26
  -8   8   3    1.58    0.27
   8  -9  -3   81.01    2.28
  -8   9  -3   82.03    2.24
  -9  -8  -3   80.72    2.31
   9   8  -3   80.90    2.30
  -8   9  -3   89.28    2.24
   8  -9   3   83.95    2.20
  -8   9   3   81.34    2.28
   9   8   3   84.73    2.25
  -9  -8   3   83.08    2.34
   9   7  -3   40.02    1.24
  -7   9  -3   42.20    1.17
   7  -9  -3   37.96    1.21
  -7   9  -3   38.95    1.17
  -9  -7  -3   40.08    1.24
  -9  -7   3   39.79    1.27
  -7   9   3   39.38    1.22
   7  -9   3   39.96    1.12
   9   7   3   38.41    1.16
   9   6  -3    2.95    0.30
  -6   9  -3    3.54    0.30
  -6   9  -3    3.17    0.27
   6  -9  -3    2.70    0.29
  -9  -6  -3    3.06    0.30
   9   6   3    3.65    0.31
   6  -9   3    2.98    0.24
  -9  -6   3    3.47    0.35
  -6   9   3    3.77    0.34
   5  -9  -3    0.22    0.19
  -9  -5  -3    0.39    0.21
  -5   9  -3    0.68    0.16
   9   5  -3    0.24    0.21
  -5   9  -3    0.42    0.19
  -9  -5   3    0.56    0.21
  -5   9   3    0.19    0.20
   9   5   3    0.35    0.14
   5  -9   3    0.23    0.13
   9   4  -3   17.50    0.67
  -4   9  -3   17.91    0.60
  -4   9  -3   17.13    0.62
   4  -9  -3   17.89    0.66
  -9  -4  -3   17.92    0.64
  -9  -4  -3   17.80    0.66
  -9  -4   3   16.73    0.68
   4  -9   3   18.37    0.57
  -4   9   3   17.94    0.65
   9   4   3   17.34    0.59
  -3   9  -3    3.95    0.32
   3  -9  -3    3.08    0.27
  -3   9  -3    3.78    0.28
   9   3  -3    3.20    0.28
  -9  -3  -3    3.65    0.28
  -9  -3  -3    3.93    0.30
  -9  -3   3    4.14    0.32
   9   3   3    3.74    0.27
   3  -9   3    3.85    0.26
  -3   9   3    3.29    0.27
   9   2  -3   15.34    0.62
  -9  -2  -3   16.72    0.57
  -9  -2  -3   16.64    0.59
  -2   9  -3   16.11    0.59
   2  -9  -3   16.27    0.61
  -2   9  -3   18.26    0.58
   9   2   3   16.09    0.54
  -2   9   3   16.14    0.60
   2  -9   3   16.41    0.55
  -9  -2   3   16.65    0.63
   1  -9  -3    7.85    0.44
  -9  -1  -3    9.16    0.38
   9   1  -3    8.24    0.44
  -1   9  -3    9.41    0.40
  -1   9  -3    8.33    0.42
  -9  -1  -3    8.14    0.39
   1  -9   3    8.54    0.37
  -9  -1   3    8.60    0.44
   9   1   3    8.42    0.35
  -1   9   3    8.17    0.42
   0   9  -3   30.17    0.96
  -9   0  -3   33.06    0.93
   0  -9  -3   31.07    0.98
   0   9  -3   33.64    0.96
  -9   0  -3   31.87    0.93
   9   0  -3   32.07    0.98
   0  -9   3   32.74    0.94
   9   0   3   31.36    0.90
   0   9   3   31.45    0.96
  -9   0   3   32.19    0.98
  -9   1  -3   34.84    0.94
   9  -1  -3   32.71    0.98
   1   9  -3   30.87    0.97
  -1  -9  -3   31.18    0.99
  -9   1  -3   31.64    0.93
  -9   1   3   31.40    0.98
   9  -1   3   32.23    0.90
   1   9   3   32.74    0.97
  -1  -9   3   32.38    0.96
   9  -2  -3   12.17    0.51
  -2  -9  -3   12.46    0.55
  -9   2  -3   12.61    0.44
   2   9  -3   11.30    0.51
  -9   2  -3   12.87    0.46
   9  -2   3   12.06    0.42
   2   9   3   12.39    0.50
  -9   2   3   12.32    0.53
  -2  -9   3   11.65    0.50
  -3  -9  -3    0.42    0.21
  -9   3  -3    0.56    0.13
   9  -3  -3    0.17    0.18
   3   9  -3    0.76    0.21
  -9   3  -3    0.45    0.15
  -3  -9   3    0.52    0.19
  -9   3   3    0.45    0.18
   9  -3   3    0.45    0.12
   3   9   3    0.38    0.17
  -4  -9  -3   25.17    0.84
   9  -4  -3   24.32    0.81
  -9   4  -3   23.93    0.75
  -9   4  -3   24.26    0.74
   4   9  -3   23.64    0.82
   4   9   3   24.60    0.80
   9  -4   3   25.32    0.72
  -4  -9   3   25.02    0.84
  -9   4   3   25.03    0.82
  -9   5  -3   10.71    0.41
   9  -5  -3    9.29    0.48
  -9   5  -3    9.83    0.43
  -5  -9  -3   10.21    0.53
   5   9  -3    9.56    0.51
  -5  -9   3    9.14    0.53
   5   9   3    9.76    0.45
   9  -5   3   10.27    0.38
  -9   5   3    9.91    0.49
   6   9  -3   67.89    1.99
   9  -6  -3   74.08    1.99
  -9   6  -3   71.22    1.93
  -6  -9  -3   72.43    2.02
  -9   6  -3   76.78    1.94
  -6  -9   3   69.39    2.02
   6   9   3   73.43    1.97
   9  -6   3   72.15    1.90
  -9   6   3   71.30    1.99
  -9   7  -3   43.74    1.20
   9  -7  -3   41.94    1.26
  -9   7  -3   40.45    1.20
   7   9  -3   40.83    1.28
  -7  -9  -3   40.43    1.29
   9  -7   3   41.53    1.16
   7   9   3   42.49    1.23
  -9   7   3   40.73    1.26
  -7  -9   3   39.63    1.30
  -9   8  -3  283.13    6.82
  -8  -9  -3  265.33    6.89
   9  -8  -3  271.47    6.86
   8   9  -3  267.39    6.89
  -9   8  -3  260.86    6.81
   9  -8   3  271.63    6.78
  -9   8   3  271.80    6.87
   8   9   3  268.08    6.84
  -8  -9   3  265.31    6.92
   9   9  -3   51.62    1.62
   9  -9  -3   53.90    1.60
  -9  -9  -3   53.90    1.64
  -9   9  -3   55.28    1.56
  -9  -9   3   55.01    1.67
   9   9   3   54.40    1.57
   9  -9   3   54.53    1.49
  -9   9   3   54.22    1.61
   9 -10  -3  124.40    3.30
  -9  10  -3  122.21    3.25
  10   9  -3  122.09    3.33
 -10  -9  -3  124.60    3.35
 -10  -9   3  126.21    3.37
   9 -10   3  120.74    3.23
  10   9   3  122.06    3.26
  -9  10   3  123.98    3.31
   8 -10  -3   -0.11    0.26
  -8  10  -3    0.02    0.24
  10   8  -3    0.28    0.27
 -10  -8  -3    0.08    0.29
  10   8   3    0.19    0.22
   8 -10   3   -0.23    0.17
  -8  10   3   -0.06    0.26
 -10  -8   3    0.03    0.28
  -7  10  -3   16.06    0.66
  10   7  -3   16.93    0.73
 -10  -7  -3   16.74    0.75
  -7  10  -3   17.71    0.65
   7 -10  -3   15.07    0.69
 -10  -7   3   16.10    0.75
  -7  10   3   16.56    0.72
  10   7   3   16.41    0.63
   7 -10   3   16.58    0.58
  -6  10  -3    2.29    0.28
   6 -10  -3    2.27    0.30
  -6  10  -3    2.32    0.24
 -10  -6  -3    1.93    0.30
  10   6  -3    2.27    0.33
  -6  10   3    2.25    0.30
 -10  -6   3    2.05    0.32
   6 -10   3    2.19    0.21
  10   6   3    1.94    0.23
  10   5  -3    0.36    0.23
   5 -10  -3    0.45    0.24
 -10  -5  -3    0.91    0.25
  -5  10  -3    0.53    0.21
  -5  10  -3    0.80    0.19
   5 -10   3    0.46    0.15
  10   5   3    0.55    0.17
  -5  10   3    0.53    0.24
 -10  -5   3    0.61    0.25
   4 -10  -3   28.52    0.93
  10   4  -3   28.51    0.95
  -4  10  -3   30.70    0.89
 -10  -4  -3   29.84    0.92
 -10  -4  -3   28.14    0.93
  -4  10  -3   27.82    0.90
 -10  -4   3   28.44    0.97
  -4  10   3   27.08    0.93
  10   4   3   28.53    0.87
   4 -10   3   28.16    0.85
  -3  10  -3   34.45    0.98
  10   3  -3   30.51    1.01
   3 -10  -3   31.15    1.00
 -10  -3  -3   33.51    0.99
  -3  10  -3   31.46    0.98
 -10  -3  -3   30.29    0.98
 -10  -3   3   32.15    1.03
   3 -10   3   31.94    0.93
  -3  10   3   31.40    1.00
  10   3   3   31.84    0.94
 -10  -2  -3    0.06    0.15
  10   2  -3   -0.03    0.20
  -2  10  -3    0.01    0.16
   2 -10  -3    0.24    0.20
  -2  10  -3   -0.04    0.18
 -10  -2  -3    0.12    0.17
   2 -10   3    0.11    0.13
 -10  -2   3   -0.01    0.19
  10   2   3    0.19    0.13
  -2  10   3    0.16    0.20
 -10  -1  -3   17.56    0.63
  10   1  -3   18.29    0.68
 -10  -1  -3   18.77    0.63
  -1  10  -3   17.62    0.65
   1 -10  -3   18.15    0.68
  10   1   3   17.50    0.59
 -10  -1   3   18.47    0.68
   1 -10   3   17.71    0.61
  -1  10   3   17.71    0.66
 -10   0  -3    0.18    0.16
   0 -10  -3    0.28    0.20
   0  10  -3    0.31    0.19
  10   0  -3    0.16    0.19
 -10   0  -3    0.10    0.14
 -10   0   3    0.10    0.20
   0  10   3    0.20    0.18
  10   0   3    0.14    0.13
   0 -10   3   -0.09    0.14
   1  10  -3    4.61    0.33
  -1 -10  -3    2.98    0.30
  10  -1  -3    3.46    0.29
 -10   1  -3    4.92    0.30
 -10   1  -3    4.04    0.33
  -1 -10   3    4.35    0.34
 -10   1   3    4.62    0.38
  10  -1   3    4.33    0.27
   1  10   3    4.49    0.35
  -2 -10  -3    4.85    0.36
  10  -2  -3    4.56    0.38
 -10   2  -3    4.27    0.33
 -10   2  -3    4.87    0.30
   2  10  -3    4.86    0.35
  10  -2   3    4.68    0.29
   2  10   3    4.46    0.36
  -2 -10   3    5.48    0.38
 -10   2   3    5.10    0.39
  -3 -10  -3   35.15    1.13
  10  -3  -3   34.81    1.09
 -10   3  -3   35.24    1.04
   3  10  -3   35.88    1.10
 -10   3  -3   36.08    1.03
   3  10   3   37.52    1.09
  -3 -10   3   36.26    1.10
 -10   3   3   34.68    1.10
  10  -3   3   36.19    1.01
 -10   4  -3    1.95    0.19
 -10   4  -3    2.01    0.21
   4  10  -3    2.18    0.29
  10  -4  -3    2.18    0.27
  -4 -10  -3    2.15    0.30
 -10   4   3    1.83    0.26
  -4 -10   3    2.13    0.28
  10  -4   3    2.40    0.20
   4  10   3    1.61    0.22
   5  10  -3    7.32    0.48
  10  -5  -3    7.72    0.47
  -5 -10  -3    6.68    0.50
 -10   5  -3    6.80    0.41
 -10   5  -3    8.14    0.38
  -5 -10   3    7.59    0.51
   5  10   3    7.72    0.44
 -10   5   3    7.39    0.48
  10  -5   3    7.33    0.35
 -10   6  -3   12.13    0.52
  -6 -10  -3   11.52    0.63
 -10   6  -3   12.40    0.49
  10  -6  -3   10.80    0.57
   6  10  -3   12.04    0.60
 -10   6   3   11.97    0.59
  -6 -10   3   12.34    0.64
   6  10   3   12.41    0.55
  10  -6   3   11.55    0.45
 -10   7  -3  193.71    4.99
  -7 -10  -3  187.43    5.07
 -10   7  -3  207.69    4.99
   7  10  -3  189.65    5.06
  10  -7  -3  199.45    5.04
  -7 -10   3  193.74    5.09
 -10   7   3  190.89    5.04
   7  10   3  197.01    5.02
  10  -7   3  197.00    4.95
  10  -8  -3    4.76    0.41
  -8 -10  -3    4.68    0.43
   8  10  -3    5.52    0.44
 -10   8  -3    5.04    0.37
 -10   8   3    5.06    0.43
  10  -8   3    5.71    0.36
  -8 -10   3    5.66    0.50
   8  10   3    5.61    0.46
  10  -9  -3  325.69    8.23
 -10   9  -3  324.45    8.18
  -9 -10  -3  316.74    8.26
   9  10  -3  316.35    8.25
 -10   9   3  329.76    8.24
  -9 -10   3  323.85    8.29
   9  10   3  327.73    8.20
  10  10  -3   11.50    0.69
 -10  10  -3   11.25    0.62
  10 -10  -3   10.94    0.67
 -10 -10  -3   11.38    0.75
  10  10   3   10.40    0.59
 -10 -10   3   11.85    0.75
 -10  10   3   11.99    0.69
 -11 -10  -3    7.15    0.57
  10 -11  -3    5.59    0.48
 -10  11  -3    6.89    0.47
  11  10  -3    5.47    0.48
  11  10   3    6.09    0.51
 -11 -10   3    7.28    0.59
 -10  11   3    7.05    0.54
   9 -11  -3    7.30    0.59
 -11  -9  -3    6.57    0.52
  11   9  -3    8.35    0.63
  -9  11  -3    8.05    0.56
 -11  -9   3    9.43    0.68
  11   9   3    8.14    0.54
  -9  11   3    7.25    0.60
 -11  -8  -3    2.19    0.38
  11   8  -3    3.30    0.38
  -8  11  -3    2.68    0.32
   8 -11  -3    3.83    0.40
  11   8   3    2.80    0.31
  -8  11   3    3.28    0.40
   8 -11   3    2.94    0.29
 -11  -8   3    3.27    0.42
 -11  -7  -3    3.39    0.40
   7 -11  -3    3.01    0.35
  11   7  -3    4.04    0.41
  -7  11  -3    3.00    0.32
  11   7   3    3.28    0.30
  -7  11   3    3.67    0.39
   7 -11   3    3.07    0.25
 -11  -7   3    4.47    0.43
  11   6  -3   18.28    0.76
 -11  -6  -3   18.32    0.77
   6 -11  -3   17.09    0.74
  -6  11  -3   17.15    0.71
   6 -11   3   18.10    0.64
  -6  11   3   19.10    0.76
  11   6   3   17.92    0.66
 -11  -6   3   17.80    0.79
  11   5  -3    1.25    0.29
  -5  11  -3    0.78    0.24
   5 -11  -3    0.90    0.27
 -11  -5  -3    1.09    0.27
  -5  11   3    1.02    0.26
  11   5   3    1.02    0.20
   5 -11   3    0.69    0.18
 -11  -5   3    0.66    0.28
  11   4  -3    6.03    0.49
 -11  -4  -3    6.86    0.48
  -4  11  -3    6.24    0.44
   4 -11  -3    6.81    0.47
  -4  11   3    6.65    0.49
   4 -11   3    6.68    0.37
 -11  -4   3    6.02    0.49
  11   4   3    6.55    0.39
   3 -11  -3   14.74    0.63
  -3  11  -3   14.56    0.61
 -11  -3  -3   14.47    0.61
  11   3  -3   15.25    0.66
 -11  -3  -3   15.84    0.60
 -11  -3   3   13.38    0.64
  -3  11   3   14.13    0.64
   3 -11   3   14.35    0.55
  11   3   3   14.92    0.55
  11   2  -3    1.12    0.26
   2 -11  -3    0.98    0.26
 -11  -2  -3    1.28    0.22
  -2  11  -3    1.00    0.23
 -11  -2  -3    1.02    0.22
 -11  -2   3    1.09    0.26
  -2  11   3    0.98    0.25
   2 -11   3    1.10    0.19
  11   2   3    0.99    0.18
 -11  -1  -3   50.23    1.34
  11   1  -3   47.29    1.37
 -11  -1  -3   45.04    1.33
   1 -11  -3   45.97    1.37
  -1  11  -3   44.47    1.35
  -1  11   3   45.30    1.35
  11   1   3   46.69    1.29
 -11  -1   3   43.85    1.37
   1 -11   3   45.84    1.31
  11   0  -3   53.15    1.56
 -11   0  -3   53.96    1.52
 -11   0  -3   58.33    1.53
   0  11  -3   52.53    1.55
   0 -11  -3   57.32    1.59
  11   0   3   55.11    1.48
   0 -11   3   52.63    1.52
   0  11   3   53.70    1.55
 -11   0   3   51.87    1.57
  -1 -11  -3   29.67    0.99
  11  -1  -3   28.01    0.96
 -11   1  -3   31.83    0.92
   1  11  -3   29.20    0.96
 -11   1  -3   29.92    0.93
  11  -1   3   30.56    0.88
  -1 -11   3   28.87    0.94
 -11   1   3   28.09    0.97
   1  11   3   29.34    0.95
  11  -2  -3  100.38    2.72
  -2 -11  -3  102.64    2.75
   2  11  -3   99.26    2.72
 -11   2  -3  104.50    2.67
 -11   2  -3   97.89    2.66
 -11   2   3   99.49    2.72
  11  -2   3  103.28    2.64
  -2 -11   3  105.81    2.72
   2  11   3  101.00    2.71
 -11   3  -3   41.28    1.15
 -11   3  -3   39.27    1.16
  -3 -11  -3   41.53    1.26
   3  11  -3   38.82    1.22
  11  -3  -3   38.78    1.21
  11  -3   3   38.96    1.12
  -3 -11   3   41.11    1.23
 -11   3   3   38.10    1.22
   3  11   3   38.30    1.20
 -11   4  -3    7.40    0.43
  11  -4  -3    6.24    0.47
   4  11  -3    6.62    0.49
 -11   4  -3    7.21    0.38
  -4 -11  -3    7.04    0.54
  11  -4   3    6.41    0.35
  -4 -11   3    6.94    0.49
   4  11   3    6.56    0.46
 -11   4   3    6.73    0.49
 -11   5  -3   10.76    0.47
 -11   5  -3   10.43    0.51
  11  -5  -3    9.67    0.56
  -5 -11  -3   10.40    0.64
   5  11  -3   11.01    0.59
  -5 -11   3   11.30    0.61
   5  11   3   10.74    0.54
 -11   5   3   10.92    0.59
  11  -5   3   10.70    0.44
  11  -6  -3    3.50    0.35
  -6 -11  -3    4.05    0.40
 -11   6  -3    4.02    0.32
   6  11  -3    3.77    0.36
 -11   6   3    4.23    0.39
   6  11   3    5.60    0.39
  -6 -11   3    4.18    0.41
  11  -6   3    4.67    0.33
   7  11  -3   21.84    0.88
 -11   7  -3   21.47    0.79
  -7 -11  -3   22.13    0.91
  11  -7  -3   21.94    0.85
 -11   7   3   22.02    0.87
  11  -7   3   21.64    0.72
   7  11   3   22.48    0.83
  -7 -11   3   21.22    0.92
   8  11  -3  190.42    4.98
  11  -8  -3  184.60    4.94
  -8 -11  -3  189.31    5.00
  -8 -11   3  193.29    5.02
 -11   8   3  192.06    4.96
   8  11   3  193.50    4.94
  11  -9  -3   41.37    1.31
   9  11  -3   39.95    1.34
 -11   9  -3   41.17    1.27
  -9 -11  -3   39.23    1.37
  -9 -11   3   38.74    1.38
   9  11   3   40.88    1.28
 -11   9   3   40.91    1.34
 -10 -11  -3   57.98    1.86
  10  11  -3   59.74    1.84
  11 -10  -3   61.29    1.80
 -11  10  -3   61.11    1.76
 -10 -11   3   61.02    1.89
 -11  10   3   61.39    1.83
  10  11   3   59.60    1.76
  11 -11  -3    0.11    0.32
 -11  11  -3    0.28    0.29
 -11 -11  -3    0.03    0.38
  11  11  -3    0.19    0.32
 -11 -11   3    0.72    0.40
 -11  11   3    0.56    0.35
  11  11   3   -0.12    0.27
 -12 -11  -3   20.86    1.03
 -11  12  -3   19.74    0.88
  12  11  -3   19.25    0.96
  11 -12  -3   21.70    0.93
 -11  12   3   19.73    0.94
 -12 -11   3   19.67    1.01
 -10  12  -3    7.60    0.61
  12  10  -3    6.56    0.53
 -12 -10  -3    6.08    0.56
  10 -12  -3    6.38    0.51
  12  10   3    7.41    0.55
 -10  12   3    7.78    0.57
 -12 -10   3    6.72    0.57
  12   9  -3   10.87    0.70
 -12  -9  -3   10.91    0.75
   9 -12  -3   10.71    0.66
  -9  12  -3   11.24    0.64
  -9  12   3   10.32    0.67
  12   9   3   10.02    0.59
 -12  -9   3    9.59    0.73
   8 -12  -3   -0.21    0.30
  12   8  -3    0.64    0.32
 -12  -8  -3    0.37    0.33
  -8  12  -3    0.00    0.26
  12   8   3    0.24    0.23
 -12  -8   3    0.00    0.32
  -8  12   3    0.09    0.30
  12   7  -3   -0.03    0.31
 -12  -7  -3    0.30    0.31
   7 -12  -3   -0.05    0.27
  -7  12  -3    0.04    0.26
 -12  -7   3    0.01    0.30
  -7  12   3    0.30    0.30
  12   7   3    0.10    0.22
  12   6  -3    0.04    0.28
 -12  -6  -3   -0.08    0.27
   6 -12  -3   -0.08    0.28
  -6  12  -3    0.00    0.26
  -6  12   3    0.13    0.29
  12   6   3    0.04    0.20
   6 -12   3   -0.21    0.18
 -12  -6   3   -0.03    0.29
  -5  12  -3   66.06    1.85
 -12  -5  -3   64.83    1.88
   5 -12  -3   65.75    1.88
  12   5  -3   63.15    1.89
  12   5   3   67.17    1.81
   5 -12   3   65.70    1.79
  -5  12   3   64.15    1.87
 -12  -5   3   64.13    1.91
 -12  -4  -3    1.48    0.29
  -4  12  -3    1.62    0.28
   4 -12  -3    1.37    0.32
  12   4  -3    2.15    0.33
  12   4   3    1.98    0.24
   4 -12   3    1.74    0.23
  -4  12   3    2.43    0.35
 -12  -4   3    1.74    0.32
  -3  12  -3   15.05    0.66
   3 -12  -3   15.83    0.69
 -12  -3  -3   16.75    0.68
  12   3  -3   15.11    0.70
   3 -12   3   15.41    0.60
  12   3   3   15.50    0.59
  -3  12   3   15.48    0.69
 -12  -3   3   16.01    0.71
   2 -12  -3    2.13    0.30
 -12  -2  -3    2.24    0.29
  -2  12  -3    2.61    0.31
  12   2  -3    2.26    0.31
   2 -12   3    2.77    0.27
  -2  12   3    2.32    0.30
  12   2   3    2.65    0.25
 -12  -2   3    2.61    0.34
 -12  -1  -3   81.83    2.18
 -12  -1  -3   77.91    2.18
  -1  12  -3   79.63    2.20
   1 -12  -3   79.66    2.23
  12   1  -3   78.92    2.22
  12   1   3   79.40    2.14
 -12  -1   3   81.50    2.23
   1 -12   3   79.63    2.16
  -1  12   3   82.17    2.21
  12   0  -3   11.30    0.59
 -12   0  -3   11.52    0.56
   0 -12  -3   11.23    0.62
 -12   0  -3   11.90    0.52
   0  12  -3   12.75    0.60
  12   0   3   11.57    0.49
   0  12   3   11.29    0.57
 -12   0   3   11.07    0.61
   0 -12   3   11.99    0.54
 -12   1  -3  247.20    6.40
 -12   1  -3  254.98    6.40
  12  -1  -3  253.21    6.45
  -1 -12  -3  254.65    6.46
   1  12  -3  243.92    6.44
  12  -1   3  252.34    6.36
 -12   1   3  254.59    6.46
  -1 -12   3  256.46    6.43
   1  12   3  252.25    6.44
 -12   2  -3    2.99    0.27
 -12   2  -3    3.90    0.32
  12  -2  -3    3.56    0.36
   2  12  -3    3.32    0.35
  -2 -12  -3    3.17    0.37
   2  12   3    3.54    0.33
  -2 -12   3    3.06    0.33
 -12   2   3    3.66    0.36
  12  -2   3    3.37    0.27
   3  12  -3   32.21    1.09
 -12   3  -3   32.57    1.02
  -3 -12  -3   32.53    1.13
  12  -3  -3   31.21    1.07
 -12   3   3   32.75    1.09
   3  12   3   31.80    1.06
  -3 -12   3   33.41    1.09
  12  -3   3   33.17    0.97
  -4 -12  -3    2.60    0.39
  12  -4  -3    2.64    0.34
   4  12  -3    2.44    0.35
 -12   4  -3    2.79    0.29
  12  -4   3    2.85    0.25
  -4 -12   3    1.82    0.33
 -12   4   3    2.81    0.35
   4  12   3    2.58    0.30
  -5 -12  -3   75.06    2.12
   5  12  -3   72.66    2.08
 -12   5  -3   72.91    2.01
  12  -5  -3   72.09    2.05
  12  -5   3   74.08    1.96
 -12   5   3   74.03    2.07
  -5 -12   3   74.65    2.10
   5  12   3   67.63    2.03
 -12   6  -3   -0.01    0.22
   6  12  -3    0.38    0.29
  -6 -12  -3    0.39    0.33
  12  -6  -3    0.45    0.28
   6  12   3    0.30    0.25
 -12   6   3    0.26    0.30
  -6 -12   3    0.42    0.31
  12  -7  -3    8.14    0.58
 -12   7  -3    8.52    0.54
   7  12  -3    8.91    0.63
  -7 -12  -3    9.19    0.68
   7  12   3    9.63    0.56
  -7 -12   3    8.58    0.68
 -12   7   3    8.16    0.61
   8  12  -3    4.90    0.47
  -8 -12  -3    3.64    0.43
 -12   8  -3    3.80    0.37
  12  -8  -3    5.21    0.44
   8  12   3    4.26    0.39
 -12   8   3    3.23    0.39
  -8 -12   3    4.88    0.51
  12  -9  -3   53.44    1.64
 -12   9  -3   54.27    1.61
   9  12  -3   55.03    1.69
  -9 -12  -3   53.04    1.73
   9  12   3   54.34    1.63
  -9 -12   3   53.07    1.74
 -12   9   3   54.61    1.68
 -12  10  -3    0.87    0.31
  10  12  -3    0.94    0.35
 -10 -12  -3    1.65    0.43
  12 -10  -3    1.45    0.37
 -10 -12   3    1.82    0.43
 -12  10   3    0.82    0.36
  10  12   3    1.50    0.32
  12 -11  -3   -0.48    0.31
 -11 -12  -3    0.04    0.39
  11  12  -3   -0.01    0.34
 -12  11  -3   -0.22    0.29
  11  12   3    0.17    0.29
 -11 -12   3    0.47    0.42
 -12  11   3   -0.08    0.37
 -12 -12  -3    3.15    0.53
 -12  12  -3    2.02    0.38
  12 -12  -3    1.95    0.40
  12  12  -3    3.07    0.48
 -12  12   3    2.44    0.46
 -12 -12   3    3.51    0.56
  13  12  -3    4.74    0.55
 -13 -12  -3    3.40    0.55
  12 -13  -3    4.55    0.52
 -12  13  -3    3.71    0.45
 -13 -12   3    3.81    0.58
 -12  13   3    4.22    0.56
 -11  13  -3    0.15    0.33
  11 -13  -3   -0.08    0.37
  13  11  -3    0.03    0.38
 -13 -11  -3    0.37    0.44
 -13 -11   3    0.33    0.42
 -11  13   3    0.51    0.39
 -13 -10  -3   45.15    1.55
  13  10  -3   43.84    1.50
 -10  13  -3   43.99    1.44
  10 -13  -3   45.77    1.49
 -10  13   3   42.47    1.48
 -13 -10   3   45.10    1.57
   9 -13  -3    1.29    0.37
  -9  13  -3    1.08    0.33
 -13  -9  -3    1.45    0.41
  13   9  -3    1.02    0.37
  -9  13   3    1.43    0.40
 -13  -9   3    1.32    0.41
  -8  13  -3    1.12    0.31
  13   8  -3    0.45    0.33
 -13  -8  -3    1.27    0.39
   8 -13  -3    0.70    0.36
  -8  13   3    1.00    0.35
 -13  -8   3    1.21    0.40
  13   7  -3   11.63    0.71
  -7  13  -3   11.11    0.66
   7 -13  -3   10.11    0.66
 -13  -7  -3   10.35    0.71
  -7  13   3   11.00    0.69
 -13  -7   3   10.57    0.73
  13   7   3   10.32    0.57
  13   6  -3   52.91    1.65
 -13  -6  -3   53.68    1.66
  -6  13  -3   54.03    1.61
   6 -13  -3   53.67    1.64
  13   6   3   52.71    1.56
  -6  13   3   53.80    1.64
 -13  -6   3   55.93    1.69
 -13  -5  -3   18.07    0.81
  13   5  -3   17.28    0.80
  -5  13  -3   18.47    0.78
   5 -13  -3   17.13    0.79
  -5  13   3   19.11    0.81
 -13  -5   3   18.34    0.83
   5 -13   3   17.70    0.68
  13   5   3   18.20    0.70
   4 -13  -3   10.58    0.64
 -13  -4  -3   10.80    0.64
  13   4  -3   10.53    0.65
  -4  13  -3   10.87    0.62
 -13  -4   3   11.75    0.67
   4 -13   3   11.72    0.53
  13   4   3   11.72    0.54
  -4  13   3   11.16    0.66
  13   3  -3    4.39    0.40
   3 -13  -3    5.19    0.44
  -3  13  -3    4.24    0.39
 -13  -3  -3    4.86    0.40
 -13  -3   3    5.30    0.45
  -3  13   3    5.01    0.43
   3 -13   3    3.55    0.31
  13   3   3    5.16    0.38
  13   2  -3   10.05    0.61
 -13  -2  -3   10.05    0.59
  -2  13  -3   10.11    0.59
   2 -13  -3   10.49    0.63
  13   2   3   10.46    0.49
 -13  -2   3   10.90    0.64
  -2  13   3    9.83    0.61
   2 -13   3   10.54    0.52
 -13  -1  -3   11.55    0.61
  -1  13  -3   12.76    0.64
   1 -13  -3   12.04    0.66
  13   1  -3   11.39    0.62
 -13  -1   3   11.72    0.65
   1 -13   3   11.22    0.56
  13   1   3   12.18    0.53
  -1  13   3   11.85    0.64
   0 -13  -3  291.26    7.33
   0  13  -3  279.94    7.29
 -13   0  -3  278.55    7.26
  13   0  -3  287.39    7.30
  13   0   3  286.57    7.22
 -13   0   3  285.68    7.31
   0 -13   3  291.59    7.27
   0  13   3  287.97    7.30
   1  13  -3   27.74    1.04
  13  -1  -3   29.34    1.04
  -1 -13  -3   30.81    1.08
 -13   1  -3   30.09    1.00
 -13   1   3   29.51    1.06
   1  13   3   30.07    1.04
  -1 -13   3   30.39    1.01
  13  -1   3   30.01    0.93
 -13   2  -3  191.39    5.05
   2  13  -3  198.67    5.11
  -2 -13  -3  194.50    5.13
  13  -2  -3  204.97    5.11
  13  -2   3  193.63    5.01
 -13   2   3  201.88    5.12
   2  13   3  194.60    5.09
  -2 -13   3  194.11    5.09
 -13   3  -3   36.91    1.17
  -3 -13  -3   38.82    1.30
   3  13  -3   37.12    1.25
  13  -3  -3   39.04    1.23
 -13   3   3   38.51    1.25
   3  13   3   36.69    1.23
  -3 -13   3   39.37    1.25
  13  -4  -3    7.37    0.50
  -4 -13  -3    5.45    0.49
 -13   4  -3    5.44    0.40
   4  13  -3    7.10    0.58
  -4 -13   3    5.81    0.47
   4  13   3    5.22    0.42
 -13   5  -3    0.12    0.25
   5  13  -3   -0.03    0.30
  13  -5  -3    0.01    0.28
  -5 -13  -3    0.02    0.35
  -5 -13   3    0.29    0.32
 -13   5   3    0.51    0.32
   5  13   3   -0.11    0.26
  -6 -13  -3   39.61    1.37
 -13   6  -3   39.02    1.24
   6  13  -3   39.67    1.32
  13  -6  -3   39.33    1.29
   6  13   3   40.36    1.28
 -13   6   3   38.35    1.31
  -6 -13   3   40.75    1.35
  13  -7  -3    0.09    0.29
  -7 -13  -3    0.25    0.34
 -13   7  -3    0.41    0.27
   7  13  -3    0.61    0.32
  -7 -13   3    0.40    0.35
   7  13   3    0.34    0.28
 -13   7   3    0.37    0.33
 -13   8  -3    0.82    0.29
  13  -8  -3    0.50    0.31
  -8 -13  -3    1.31    0.40
   8  13  -3    0.52    0.34
   8  13   3    1.22    0.31
 -13   8   3    0.64    0.33
  -8 -13   3    1.28    0.42
 -13   9  -3    3.50    0.39
  13  -9  -3    2.81    0.40
  -9 -13  -3    2.75    0.46
   9  13  -3    2.83    0.43
 -13   9   3    3.36    0.44
  -9 -13   3    3.33    0.50
   9  13   3    3.69    0.41
 -13  10  -3    0.51    0.32
 -10 -13  -3   -0.08    0.40
  13 -10  -3    0.86    0.36
  10  13  -3    0.38    0.37
  10  13   3    0.58    0.33
 -13  10   3    0.55    0.38
 -10 -13   3    1.37    0.45
  13 -11  -3    1.16    0.38
 -11 -13  -3    1.83    0.47
 -13  11  -3    2.42    0.41
  11  13  -3    2.38    0.46
 -11 -13   3    2.74    0.52
 -13  11   3    2.81    0.49
  12  13  -3    5.04    0.54
 -12 -13  -3    5.53    0.61
  13 -12  -3    6.35    0.55
 -13  12  -3    4.36    0.47
 -13  12   3    6.64    0.60
 -12 -13   3    6.50    0.65
  13  13  -3    0.44    0.43
  13 -13  -3    0.23    0.42
 -13 -13  -3    0.32    0.49
 -13  13  -3    0.61    0.38
 -13  13   3    0.16    0.47
 -13 -13   3    0.63    0.48
 -14 -13  -3   12.52    1.04
 -13  14  -3   12.27    0.86
  14  13  -3   12.39    0.95
 -14 -13   3   13.02    1.05
 -13  14   3   13.00    0.98
 -14 -12  -3    0.21    0.49
 -12  14  -3    0.31    0.37
  14  12  -3    0.13    0.41
  12 -14  -3    0.44    0.40
 -14 -12   3    0.79    0.50
 -12  14   3    0.49    0.43
  14  11  -3    0.82    0.44
  11 -14  -3    1.32    0.43
 -14 -11  -3    1.08    0.48
 -11  14  -3    0.95    0.38
 -11  14   3    0.98    0.43
 -14 -11   3    0.73    0.47
  10 -14  -3    0.79    0.41
  14  10  -3    0.89    0.41
 -14 -10  -3    1.73    0.48
 -10  14  -3    1.31    0.38
 -14 -10   3    1.29    0.48
 -10  14   3    0.92    0.39
  14   9  -3    2.85    0.44
 -14  -9  -3    2.82    0.48
   9 -14  -3    2.66    0.42
  -9  14  -3    2.08    0.38
  -9  14   3    2.87    0.47
 -14  -9   3    2.15    0.46
  -8  14  -3   17.68    0.84
 -14  -8  -3   18.55    0.94
   8 -14  -3   18.35    0.89
  14   8  -3   17.72    0.91
  -8  14   3   17.35    0.90
 -14  -8   3   17.59    0.96
  -7  14  -3   46.02    1.45
  14   7  -3   45.49    1.51
 -14  -7  -3   43.91    1.50
   7 -14  -3   44.90    1.47
 -14  -7   3   46.70    1.54
  -7  14   3   44.25    1.48
 -14  -6  -3    0.36    0.33
  -6  14  -3    0.29    0.32
   6 -14  -3    0.44    0.34
  14   6  -3    0.45    0.31
  -6  14   3    0.81    0.35
 -14  -6   3    0.62    0.36
 -14  -5  -3   31.64    1.16
  -5  14  -3   32.03    1.13
   5 -14  -3   32.00    1.15
  14   5  -3   30.89    1.15
  -5  14   3   35.30    1.18
 -14  -5   3   31.37    1.18
   4 -14  -3    0.73    0.35
 -14  -4  -3    0.54    0.30
  -4  14  -3    0.45    0.29
  14   4  -3    1.07    0.32
  -4  14   3    0.43    0.32
 -14  -4   3    0.79    0.35
 -14  -3  -3    3.41    0.39
  14   3  -3    3.45    0.41
  -3  14  -3    2.26    0.34
   3 -14  -3    2.88    0.38
 -14  -3   3    3.02    0.41
  -3  14   3    3.15    0.39
   3 -14   3    3.16    0.30
  14   2  -3    1.11    0.33
   2 -14  -3    0.74    0.30
  -2  14  -3    0.92    0.32
 -14  -2  -3    0.99    0.29
  -2  14   3    1.32    0.35
   2 -14   3    1.38    0.27
 -14  -2   3    0.84    0.31
 -14  -1  -3   51.18    1.51
  -1  14  -3   47.88    1.52
   1 -14  -3   48.76    1.55
  14   1  -3   50.00    1.54
  -1  14   3   51.07    1.53
 -14  -1   3   48.55    1.54
   1 -14   3   48.82    1.47
   0  14  -3   28.39    1.04
  14   0  -3   28.45    1.03
   0 -14  -3   28.40    1.07
 -14   0  -3   28.68    1.00
   0  14   3   28.47    1.04
   0 -14   3   27.01    0.98
 -14   0   3   29.98    1.07
 -14   1  -3  240.58    6.20
   1  14  -3  237.23    6.24
  -1 -14  -3  238.90    6.27
  14  -1  -3  243.47    6.23
 -14   1   3  243.56    6.25
  -1 -14   3  242.44    6.22
   1  14   3  247.71    6.24
  14  -2  -3    7.56    0.58
   2  14  -3    5.47    0.46
  -2 -14  -3    8.39    0.59
 -14   2  -3    6.54    0.54
   2  14   3    7.52    0.52
 -14   2   3    6.29    0.49
  -2 -14   3    7.51    0.55
   3  14  -3   27.86    1.06
 -14   3  -3   28.46    1.00
  14  -3  -3   28.83    1.04
  -3 -14  -3   28.19    1.11
   3  14   3   29.14    1.04
  -3 -14   3   29.44    1.07
 -14   3   3   30.32    1.08
  -4 -14  -3    1.54    0.42
  14  -4  -3    1.43    0.34
   4  14  -3    1.32    0.33
 -14   4  -3    1.03    0.29
   4  14   3    1.31    0.32
  -4 -14   3    2.30    0.38
 -14   4   3    1.35    0.36
 -14   5  -3   40.83    1.31
  14  -5  -3   43.06    1.37
  -5 -14  -3   42.08    1.46
   5  14  -3   43.44    1.42
  -5 -14   3   41.31    1.41
   5  14   3   42.40    1.36
 -14   5   3   42.94    1.40
  -6 -14  -3   34.03    1.32
 -14   6  -3   35.56    1.20
  14  -6  -3   36.66    1.24
   6  14  -3   37.19    1.28
   6  14   3   37.89    1.25
 -14   6   3   37.28    1.27
  -6 -14   3   36.10    1.31
   7  14  -3    3.73    0.46
 -14   7  -3    3.09    0.38
  14  -7  -3    4.26    0.46
  -7 -14  -3    4.17    0.53
  -7 -14   3    3.33    0.46
 -14   7   3    3.11    0.45
   7  14   3    4.88    0.44
  -8 -14  -3    0.35    0.41
   8  14  -3    0.32    0.37
  14  -8  -3    0.29    0.33
 -14   8  -3    0.44    0.30
  -8 -14   3    0.32    0.37
 -14   8   3    0.24    0.37
   8  14   3    0.85    0.32
 -14   9  -3    0.04    0.31
  14  -9  -3    0.18    0.35
  -9 -14  -3    0.18    0.42
   9  14  -3   -0.04    0.37
  -9 -14   3    0.53    0.43
   9  14   3    0.12    0.33
 -14   9   3   -0.09    0.36
 -10 -14  -3   -0.30    0.43
 -14  10  -3    0.12    0.34
  14 -10  -3   -0.17    0.35
  10  14  -3    0.31    0.37
 -14  10   3    0.17    0.38
 -10 -14   3    0.41    0.44
 -11 -14  -3    3.02    0.52
 -14  11  -3    2.64    0.42
  11  14  -3    2.08    0.45
  14 -11  -3    2.72    0.46
 -11 -14   3    2.64    0.54
 -14  11   3    2.64    0.51
 -14  12  -3    0.11    0.39
 -12 -14  -3    0.04    0.46
  12  14  -3    0.36    0.43
  14 -12  -3   -0.41    0.39
 -12 -14   3    0.07    0.49
 -14  12   3   -0.17    0.45
 -13 -14  -3    2.99    0.58
  13  14  -3    2.69    0.52
 -14  13  -3    3.80    0.52
 -14  13   3    3.57    0.59
 -13 -14   3    2.39    0.60
 -14  14  -3   -0.27    0.43
  14  14  -3    0.36    0.47
 -14 -14  -3    0.63    0.53
 -14  14   3   -0.83    0.48
 -14 -14   3    0.58    0.55
 -15 -13  -3    5.37    0.67
 -13  15  -3    4.37    0.55
  15  13  -3    5.46    0.64
 -15 -13   3    4.62    0.68
 -13  15   3    5.45    0.69
  15  12  -3   18.47    1.04
 -12  15  -3   16.69    0.97
 -15 -12  -3   18.39    1.15
 -12  15   3   19.06    1.05
 -15 -12   3   18.17    1.13
 -11  15  -3    0.52    0.41
  11 -15  -3    0.66    0.43
  15  11  -3    0.37    0.44
 -15 -11  -3    0.68    0.51
 -11  15   3    0.07    0.43
 -15 -11   3    0.65    0.50
  10 -15  -3    0.06    0.40
 -15 -10  -3   -0.55    0.44
 -10  15  -3   -0.27    0.36
  15  10  -3   -0.26    0.39
 -10  15   3   -0.16    0.41
 -15 -10   3   -0.03    0.44
 -15  -9  -3    2.98    0.51
  -9  15  -3    2.66    0.44
   9 -15  -3    2.75    0.45
  15   9  -3    3.40    0.51
  -9  15   3    2.66    0.47
 -15  -9   3    3.17    0.51
  15   8  -3   72.21    2.18
 -15  -8  -3   71.13    2.19
  -8  15  -3   71.75    2.13
   8 -15  -3   71.85    2.16
  -8  15   3   71.82    2.17
 -15  -8   3   71.45    2.22
 -15  -7  -3   23.43    1.07
  15   7  -3   24.38    1.08
  -7  15  -3   22.54    1.01
   7 -15  -3   24.13    1.05
 -15  -7   3   24.30    1.10
  -7  15   3   24.98    1.05
  -6  15  -3  128.05    3.50
 -15  -6  -3  130.48    3.54
  15   6  -3  126.18    3.53
   6 -15  -3  130.05    3.52
  -6  15   3  128.11    3.53
 -15  -6   3  131.66    3.58
 -15  -5  -3   36.14    1.28
  -5  15  -3   34.06    1.25
   5 -15  -3   34.97    1.26
  15   5  -3   35.68    1.28
 -15  -5   3   35.58    1.32
  -5  15   3   37.31    1.28
   4 -15  -3   -0.34    0.31
 -15  -4  -3    0.24    0.33
  15   4  -3   -0.02    0.33
  -4  15  -3    0.01    0.31
  -4  15   3    0.24    0.33
 -15  -4   3    0.22    0.37
  15   3  -3    5.77    0.51
   3 -15  -3    4.37    0.45
  -3  15  -3    4.64    0.47
 -15  -3  -3    5.32    0.47
  -3  15   3    5.96    0.52
 -15  -3   3    5.97    0.52
 -15  -2  -3    6.69    0.50
  15   2  -3    7.70    0.63
   2 -15  -3    8.46    0.59
  -2  15  -3    7.48    0.63
 -15  -2   3    7.18    0.55
  -2  15   3    7.91    0.65
  -1  15  -3    0.05    0.32
 -15  -1  -3    0.47    0.30
  15   1  -3    0.63    0.34
   1 -15  -3    0.58    0.34
   1 -15   3    0.83    0.27
 -15  -1   3    0.41    0.32
  -1  15   3    0.80    0.34
  15   0  -3   31.72    1.16
   0 -15  -3   33.72    1.21
 -15   0  -3   31.54    1.13
   0  15  -3   33.94    1.19
 -15   0   3   33.64    1.21
   0 -15   3   33.22    1.13
   0  15   3   35.55    1.18
  15  -1  -3   19.73    0.86
 -15   1  -3   19.67    0.84
  -1 -15  -3   19.67    0.93
   1  15  -3   20.29    0.89
   1  15   3   20.07    0.87
  -1 -15   3   20.10    0.85
 -15   1   3   20.09    0.92
  -2 -15  -3   34.25    1.26
   2  15  -3   32.94    1.21
  15  -2  -3   35.55    1.20
 -15   2  -3   34.52    1.16
 -15   2   3   33.03    1.22
   2  15   3   32.90    1.17
  -2 -15   3   33.87    1.18
 -15   3  -3    3.75    0.39
  -3 -15  -3    3.03    0.46
  15  -3  -3    3.95    0.45
   3  15  -3    2.84    0.41
 -15   3   3    2.72    0.43
  -3 -15   3    3.64    0.42
   3  15   3    3.25    0.40
  -4 -15  -3    0.43    0.40
 -15   4  -3    0.39    0.29
  15  -4  -3    0.36    0.34
   4  15  -3    0.22    0.35
 -15   4   3    0.65    0.35
  -4 -15   3    0.07    0.33
   4  15   3    0.25    0.30
   5  15  -3    0.61    0.37
  15  -5  -3    0.76    0.34
 -15   5  -3    0.60    0.31
  -5 -15  -3    0.91    0.44
   5  15   3    1.13    0.33
 -15   5   3    0.65    0.35
  -5 -15   3    0.59    0.37
  15  -6  -3    1.29    0.37
  -6 -15  -3    1.32    0.45
 -15   6  -3    1.58    0.35
   6  15  -3    0.82    0.38
   6  15   3    0.94    0.34
 -15   6   3    1.07    0.39
  -6 -15   3    1.47    0.41
  -7 -15  -3    2.70    0.52
   7  15  -3    2.43    0.44
 -15   7  -3    2.17    0.37
  15  -7  -3    2.10    0.41
  -7 -15   3    1.67    0.44
   7  15   3    1.87    0.38
 -15   7   3    1.87    0.41
  -8 -15  -3    5.10    0.60
 -15   8  -3    4.23    0.45
  15  -8  -3    4.43    0.49
   8  15  -3    4.09    0.52
 -15   8   3    4.35    0.50
   8  15   3    4.73    0.48
  -8 -15   3    4.66    0.56
   9  15  -3    2.95    0.50
 -15   9  -3    3.58    0.44
  -9 -15  -3    3.60    0.55
  15  -9  -3    3.11    0.45
  -9 -15   3    3.76    0.55
 -15   9   3    3.74    0.52
   9  15   3    3.01    0.43
  10  15  -3    1.55    0.46
  15 -10  -3    0.99    0.42
 -10 -15  -3    0.84    0.50
 -15  10  -3    0.95    0.38
 -10 -15   3    1.39    0.49
 -15  10   3    1.77    0.49
 -11 -15  -3    6.22    0.67
  11  15  -3    6.68    0.62
 -15  11  -3    5.71    0.54
 -15  11   3    4.94    0.58
 -11 -15   3    6.31    0.67
 -15  12  -3    5.63    0.56
  12  15  -3    7.33    0.66
 -12 -15  -3    7.20    0.72
 -15  12   3    5.42    0.61
 -12 -15   3    6.12    0.68
  13  15  -3    7.45    0.69
 -15  13  -3    6.26    0.61
 -13 -15  -3    5.38    0.69
 -13 -15   3    6.64    0.74
 -15  13   3    5.75    0.68
  16  12  -3    3.17    0.55
 -16 -12  -3    2.96    0.63
 -12  16  -3    2.48    0.50
 -16 -12   3    3.67    0.66
 -12  16   3    2.96    0.56
 -11  16  -3    4.24    0.55
 -16 -11  -3    3.60    0.62
  16  11  -3    3.93    0.57
 -16 -11   3    4.74    0.64
 -11  16   3    4.33    0.60
 -16 -10  -3   -0.23    0.48
  16  10  -3    0.63    0.42
  10 -16  -3    0.58    0.44
 -10  16  -3   -0.01    0.39
 -16 -10   3   -0.05    0.49
 -10  16   3    0.30    0.44
  16   9  -3   19.02    1.03
   9 -16  -3   17.89    0.99
  -9  16  -3   18.70    0.97
 -16  -9  -3   19.19    1.07
  -9  16   3   18.40    1.00
 -16  -9   3   18.50    1.07
  -8  16  -3    4.47    0.50
   8 -16  -3    5.71    0.57
  16   8  -3    5.21    0.57
 -16  -8  -3    5.57    0.60
  -8  16   3    4.95    0.55
 -16  -8   3    5.95    0.64
  16   7  -3  203.83    5.37
  -7  16  -3  200.88    5.32
 -16  -7  -3  203.96    5.37
   7 -16  -3  205.45    5.36
 -16  -7   3  199.15    5.40
  -7  16   3  198.50    5.35
   6 -16  -3   11.11    0.81
 -16  -6  -3   10.85    0.84
  16   6  -3   10.79    0.82
  -6  16  -3   11.78    0.81
 -16  -6   3   10.54    0.87
  -6  16   3   10.63    0.80
  16   5  -3   53.48    1.72
  -5  16  -3   52.91    1.70
 -16  -5  -3   54.56    1.72
   5 -16  -3   52.51    1.72
  -5  16   3   53.48    1.72
 -16  -5   3   52.20    1.75
  -4  16  -3    3.74    0.47
  16   4  -3    3.27    0.46
   4 -16  -3    4.27    0.49
 -16  -4  -3    4.08    0.49
  -4  16   3    3.77    0.49
 -16  -4   3    3.88    0.52
  -3  16  -3   33.56    1.22
 -16  -3  -3   33.30    1.20
   3 -16  -3   32.75    1.23
  16   3  -3   31.43    1.22
 -16  -3   3   32.82    1.26
  -3  16   3   31.25    1.23
   2 -16  -3    6.08    0.53
  16   2  -3    7.69    0.59
 -16  -2  -3    8.03    0.67
  -2  16  -3    8.36    0.60
  -2  16   3    8.42    0.71
 -16  -2   3    9.33    0.73
  -1  16  -3   17.22    0.90
  16   1  -3   18.25    0.87
   1 -16  -3   17.55    0.92
 -16  -1  -3   19.00    0.87
 -16  -1   3   18.08    0.92
  -1  16   3   19.23    0.91
 -16   0  -3    6.19    0.50
  16   0  -3    5.46    0.50
   0 -16  -3    6.35    0.57
   0  16  -3    6.51    0.54
   0  16   3    6.57    0.52
 -16   0   3    5.62    0.52
  16  -1  -3    2.88    0.44
   1  16  -3    2.06    0.43
 -16   1  -3    3.09    0.40
  -1 -16  -3    2.93    0.47
   1  16   3    2.80    0.43
 -16   1   3    1.44    0.39
 -16   2  -3    0.36    0.32
  16  -2  -3   -0.05    0.34
   2  16  -3   -0.07    0.36
  -2 -16  -3   -0.27    0.38
   2  16   3    0.38    0.32
 -16   2   3   -0.61    0.36
  -2 -16   3    0.39    0.33
  -3 -16  -3   -0.22    0.39
   3  16  -3    0.06    0.36
 -16   3  -3    0.26    0.32
  16  -3  -3    0.45    0.35
  -3 -16   3    0.25    0.34
   3  16   3    0.36    0.34
 -16   3   3   -0.47    0.36
  -4 -16  -3    3.28    0.52
   4  16  -3    3.67    0.49
  16  -4  -3    3.87    0.46
 -16   4  -3    3.55    0.42
   4  16   3    3.80    0.44
 -16   4   3    3.84    0.50
  -4 -16   3    3.40    0.48
  -5 -16  -3    5.72    0.60
  16  -5  -3    6.19    0.55
   5  16  -3    4.54    0.51
 -16   5  -3    6.95    0.52
   5  16   3    5.04    0.49
 -16   5   3    6.54    0.58
  -5 -16   3    5.98    0.58
 -16   6  -3    0.39    0.33
  -6 -16  -3    0.58    0.47
  16  -6  -3    0.01    0.37
   6  16  -3   -0.08    0.38
 -16   6   3    0.23    0.39
  -6 -16   3    0.19    0.42
   6  16   3    0.14    0.34
  -7 -16  -3   33.85    1.38
  16  -7  -3   33.59    1.25
   7  16  -3   32.53    1.30
 -16   7  -3   33.78    1.22
  -7 -16   3   31.42    1.35
   7  16   3   33.43    1.24
 -16   7   3   33.97    1.31
  16  -8  -3    1.73    0.44
   8  16  -3    1.79    0.49
 -16   8  -3    1.66    0.40
  -8 -16  -3    1.49    0.51
   8  16   3    1.42    0.41
 -16   8   3    1.43    0.47
  -8 -16   3    1.84    0.48
   9  16  -3   19.72    1.04
  -9 -16  -3   20.81    1.15
  16  -9  -3   18.28    0.95
 -16   9  -3   17.52    0.93
  -9 -16   3   19.56    1.11
 -16   9   3   19.00    1.05
 -10 -16  -3    2.29    0.57
  10  16  -3    1.82    0.49
 -16  10  -3    1.62    0.44
 -16  10   3    2.40    0.52
 -10 -16   3    1.71    0.52
  11  16  -3   35.07    1.43
 -11 -16  -3   34.56    1.50
 -16  11  -3   31.96    1.30
 -11 -16   3   34.52    1.51
 -16  11   3   32.32    1.39
  12  16  -3    4.70    0.61
 -12 -16  -3    3.76    0.65
 -16  12  -3    4.95    0.57
 -16  12   3    4.19    0.64
 -11  17  -3    3.48    0.55
 -17 -11  -3    4.34    0.67
  17  11  -3    4.49    0.63
 -11  17   3    3.91    0.61
 -17 -11   3    3.90    0.66
  17  10  -3    0.82    0.48
 -17 -10  -3    1.06    0.54
 -10  17  -3    1.01    0.46
 -17 -10   3    0.44    0.53
 -10  17   3   -0.22    0.47
 -17  -9  -3    4.18    0.60
  17   9  -3    4.81    0.61
   9 -17  -3    4.12    0.55
  -9  17  -3    4.23    0.54
  -9  17   3    5.44    0.61
 -17  -9   3    4.71    0.62
 -17  -8  -3   67.91    2.18
  17   8  -3   68.94    2.17
   8 -17  -3   68.22    2.16
  -8  17  -3   65.97    2.11
  -8  17   3   69.30    2.17
 -17  -8   3   71.70    2.24
   7 -17  -3   16.10    1.00
 -17  -7  -3   15.50    0.99
  -7  17  -3   15.51    0.96
  17   7  -3   16.61    1.01
  -7  17   3   15.00    0.97
 -17  -7   3   17.06    1.06
 -17  -6  -3   96.40    2.83
   6 -17  -3   96.56    2.83
  -6  17  -3   97.39    2.79
  17   6  -3   96.74    2.83
 -17  -6   3   99.86    2.88
  -6  17   3   97.02    2.83
  -5  17  -3    2.58    0.47
 -17  -5  -3    2.49    0.48
  17   5  -3    3.66    0.52
   5 -17  -3    3.52    0.50
  -5  17   3    3.55    0.51
 -17  -5   3    4.21    0.59
 -17  -4  -3    0.38    0.40
   4 -17  -3   -0.60    0.38
  -4  17  -3    0.37    0.41
  17   4  -3    0.28    0.38
  -4  17   3   -0.09    0.40
 -17  -4   3    0.30    0.44
 -17  -3  -3   -0.19    0.37
   3 -17  -3   -0.24    0.37
  -3  17  -3    0.07    0.39
  17   3  -3    0.01    0.38
 -17  -3   3    0.26    0.42
  -3  17   3   -0.40    0.38
   2 -17  -3   21.52    1.03
  17   2  -3   23.05    1.01
 -17  -2  -3   18.78    0.97
  -2  17  -3   21.04    1.00
  -2  17   3   20.71    1.02
 -17  -2   3   22.65    1.05
  -1  17  -3    0.41    0.41
 -17  -1  -3    0.68    0.37
   1 -17  -3    0.46    0.40
  17   1  -3    0.20    0.37
  -1  17   3    0.66    0.42
 -17  -1   3    0.17    0.41
   0 -17  -3    9.82    0.81
 -17   0  -3   11.47    0.74
   0  17  -3    9.83    0.81
  17   0  -3    9.82    0.76
 -17   0   3    9.70    0.81
   0  17   3   10.36    0.79
  -1 -17  -3    2.55    0.49
 -17   1  -3    3.08    0.43
   1  17  -3    2.50    0.45
  17  -1  -3    2.83    0.45
   1  17   3    4.10    0.50
 -17   1   3    3.90    0.50
 -17   2  -3    0.46    0.35
   2  17  -3    0.43    0.41
  17  -2  -3    1.08    0.38
  -2 -17  -3    0.90    0.47
 -17   2   3    0.93    0.43
   2  17   3    0.89    0.40
  -3 -17  -3    2.26    0.52
  17  -3  -3    1.73    0.40
 -17   3  -3    1.65    0.39
   3  17  -3    1.84    0.45
 -17   3   3    2.26    0.49
   3  17   3    1.56    0.42
   4  17  -3    2.03    0.47
 -17   4  -3    1.35    0.38
  -4 -17  -3    2.28    0.54
  17  -4  -3    1.22    0.42
 -17   4   3    1.17    0.45
   4  17   3    1.90    0.42
 -17   5  -3    4.63    0.48
  -5 -17  -3    5.27    0.60
  17  -5  -3    5.83    0.56
   5  17  -3    4.67    0.57
   5  17   3    5.35    0.54
 -17   5   3    4.22    0.53
  -6 -17  -3   30.59    1.37
   6  17  -3   31.78    1.30
  17  -6  -3   30.07    1.22
 -17   6  -3   31.23    1.19
   6  17   3   32.76    1.23
 -17   6   3   32.23    1.30
  17  -7  -3    5.56    0.60
 -17   7  -3    7.10    0.57
   7  17  -3    6.55    0.64
  -7 -17  -3    6.11    0.67
 -17   7   3    6.21    0.60
   7  17   3    6.68    0.60
   8  17  -3   29.98    1.31
  -8 -17  -3   30.33    1.39
 -17   8  -3   30.12    1.21
 -17   8   3   31.70    1.31
   9  17  -3    6.11    0.63
  -9 -17  -3    5.39    0.70
 -17   9  -3    4.33    0.53
 -17   9   3    4.99    0.63
 -17  10  -3   55.67    1.80
  10  17  -3   56.85    1.91
 -10 -17  -3   52.59    1.98
 -17  10   3   53.34    1.88
 -11 -17  -3   15.76    1.16
  11  17  -3   14.72    1.05
 -17  11  -3   13.42    0.95
 -17  11   3   10.66    0.82
 -18  -9  -3    0.39    0.52
  -9  18  -3   -0.43    0.45
  18   9  -3    0.41    0.48
  -9  18   3    0.42    0.50
 -18  -9   3    0.36    0.53
  18   8  -3    0.92    0.48
  -8  18  -3    0.75    0.46
   8 -18  -3    1.07    0.54
 -18  -8  -3    1.61    0.54
 -18  -8   3    0.84    0.56
  -8  18   3    1.14    0.52
 -18  -7  -3   38.05    1.50
  18   7  -3   37.67    1.46
   7 -18  -3   35.89    1.44
  -7  18  -3   36.27    1.44
  -7  18   3   36.34    1.46
 -18  -7   3   37.56    1.55
  18   6  -3    1.01    0.49
  -6  18  -3    1.30    0.48
 -18  -6  -3    1.49    0.51
   6 -18  -3    0.41    0.47
  -6  18   3    0.81    0.47
 -18  -6   3    1.14    0.53
   5 -18  -3    8.36    0.68
  -5  18  -3   10.33    0.73
 -18  -5  -3    8.85    0.71
  18   5  -3   10.15    0.82
 -18  -5   3    9.54    0.76
  -5  18   3   10.49    0.76
  18   4  -3   -0.08    0.41
  -4  18  -3    0.23    0.43
 -18  -4  -3    0.42    0.43
   4 -18  -3   -0.62    0.42
  -4  18   3   -0.29    0.44
 -18  -4   3   -0.33    0.44
 -18  -3  -3   -0.37    0.40
  -3  18  -3    0.02    0.40
  18   3  -3    0.58    0.41
   3 -18  -3   -0.34    0.41
  -3  18   3   -0.28    0.43
 -18  -3   3   -0.59    0.44
  -2  18  -3    0.80    0.46
  18   2  -3    0.99    0.44
 -18  -2  -3    1.05    0.42
   2 -18  -3    1.38    0.45
 -18  -2   3    1.08    0.47
  -2  18   3    0.61    0.45
  -1  18  -3    0.45    0.43
  18   1  -3    0.26    0.40
   1 -18  -3    0.45    0.45
 -18  -1  -3    1.19    0.42
  -1  18   3    0.05    0.42
 -18  -1   3    0.36    0.43
 -18   0  -3    1.27    0.42
   0  18  -3    1.41    0.46
  18   0  -3    1.56    0.46
   0 -18  -3    0.83    0.46
   0  18   3    1.34    0.44
 -18   0   3    1.22    0.46
  -1 -18  -3    2.33    0.52
  18  -1  -3    1.36    0.44
 -18   1  -3    1.18    0.41
   1  18  -3    1.10    0.45
 -18   1   3    2.31    0.52
   1  18   3    1.44    0.44
  18  -2  -3   -0.11    0.39
  -2 -18  -3    0.58    0.48
 -18   2  -3    0.47    0.39
   2  18  -3    0.20    0.44
 -18   2   3    0.19    0.45
   2  18   3    0.12    0.39
   3  18  -3    0.03    0.44
  -3 -18  -3    0.18    0.46
  18  -3  -3    0.16    0.38
 -18   3  -3    0.48    0.39
 -18   3   3   -0.06    0.47
   3  18   3    0.47    0.41
  18  -4  -3    1.03    0.45
  -4 -18  -3    1.62    0.57
 -18   4  -3    1.21    0.43
   4  18  -3    1.94    0.50
   4  18   3    1.46    0.43
 -18   4   3    1.34    0.48
   5  18  -3   28.01    1.25
  -5 -18  -3   27.76    1.35
 -18   5  -3   27.24    1.16
   5  18   3   27.92    1.19
 -18   5   3   28.57    1.25
 -18   6  -3    1.42    0.43
  -6 -18  -3    1.09    0.55
   6  18  -3    1.07    0.50
 -18   6   3    0.81    0.51
   6  18   3    1.35    0.44
 -18   7  -3    9.56    0.69
  -7 -18  -3    9.84    0.82
   7  18  -3    9.29    0.74
 -18   7   3    7.96    0.72
   8  18  -3    0.77    0.52
  -8 -18  -3    0.43    0.60
 -18   8  -3    0.09    0.43
 -18   8   3    0.11    0.52
   9  18  -3    9.86    0.80
 -18   9  -3   10.31    0.74
  -9 -18  -3   10.37    0.90
 -18   9   3   11.00    0.84
 -19  -7  -3    3.10    0.60
  -7  19  -3    2.71    0.56
  -7  19   3    2.90    0.57
 -19  -7   3    3.12    0.62
  -6  19  -3    1.07    0.53
 -19  -6  -3    1.12    0.54
   6 -19  -3    0.86    0.51
 -19  -6   3    0.72    0.55
  -6  19   3    0.90    0.51
  -5  19  -3   -0.05    0.46
 -19  -5  -3    0.24    0.48
  19   5  -3    0.24    0.47
   5 -19  -3    0.02    0.47
 -19  -5   3    0.53    0.51
  -5  19   3    0.64    0.49
   4 -19  -3    3.63    0.59
 -19  -4  -3    3.04    0.54
  19   4  -3    4.23    0.54
  -4  19  -3    3.18    0.55
 -19  -4   3    3.23    0.59
  -4  19   3    2.88    0.54
   3 -19  -3    1.61    0.52
  19   3  -3    1.71    0.47
 -19  -3  -3    1.70    0.50
  -3  19  -3    2.92    0.53
 -19  -3   3    2.94    0.56
  -3  19   3    2.78    0.57
  -2  19  -3   17.13    1.04
 -19  -2  -3   18.65    1.03
  19   2  -3   18.83    1.00
   2 -19  -3   18.06    1.08
 -19  -2   3   17.91    1.09
  -2  19   3   18.50    1.08
   1 -19  -3    0.96    0.51
 -19  -1  -3    0.71    0.45
  -1  19  -3    1.10    0.49
  19   1  -3    0.89    0.50
 -19  -1   3    0.39    0.47
  -1  19   3    0.11    0.45
   0 -19  -3    4.61    0.63
 -19   0  -3    3.85    0.54
   0  19  -3    4.73    0.62
 -19   0   3    4.29    0.61
   0  19   3    3.49    0.54
   1  19  -3    3.31    0.55
 -19   1  -3    2.77    0.51
  -1 -19  -3    3.45    0.59
 -19   1   3    2.63    0.56
   1  19   3    2.84    0.52
  -2 -19  -3    6.62    0.68
 -19   2  -3    7.73    0.63
   2  19  -3    8.76    0.71
   2  19   3    8.63    0.69
 -19   2   3    7.85    0.69
   3  19  -3    6.06    0.64
  -3 -19  -3    7.12    0.74
 -19   3  -3    7.67    0.64
   3  19   3    7.44    0.64
 -19   3   3    8.05    0.71
 -19   4  -3   41.42    1.50
   4  19  -3   43.15    1.60
  -4 -19  -3   41.34    1.66
   4  19   3   41.22    1.54
 -19   4   3   40.94    1.61
 -19   5  -3    5.79    0.60
  -5 -19  -3    6.51    0.76
   5  19  -3    6.10    0.67
 -19   5   3    6.79    0.69
   5  19   3    6.42    0.62
  -6 -19  -3   14.22    1.14
   6  19  -3   15.03    1.07
 -19   6  -3   15.70    0.99
 -19   6   3   14.02    1.08
 -19   7  -3    1.49    0.51
   7  19  -3    2.46    0.57
  -7 -19  -3    1.23    0.61
 -19   7   3    1.96    0.60
 -20  -4  -3    3.42    0.60
  -4  20  -3    3.22    0.61
   4 -20  -3    3.43    0.61
 -20  -4   3    3.67    0.65
  -4  20   3    2.63    0.58
 -20  -3  -3   24.79    1.26
   3 -20  -3   24.96    1.28
  -3  20  -3   26.28    1.26
  -3  20   3   26.21    1.30
 -20  -3   3   26.57    1.31
  -2  20  -3    3.29    0.61
   2 -20  -3    2.22    0.55
 -20  -2  -3    3.93    0.60
 -20  -2   3    3.41    0.62
  -2  20   3    2.52    0.57
 -20  -1  -3   32.80    1.40
   1 -20  -3   33.61    1.47
  -1  20  -3   32.16    1.44
  -1  20   3   33.21    1.44
 -20  -1   3   35.30    1.47
   0  20  -3    0.25    0.51
   0 -20  -3    0.17    0.53
 -20   0  -3    0.09    0.48
 -20   0   3   -0.65    0.49
   0  20   3   -0.27    0.49
  -1 -20  -3   15.13    1.11
   1  20  -3   15.55    1.11
 -20   1  -3   14.23    1.00
   1  20   3   14.68    1.01
 -20   1   3   14.68    1.08
  -2 -20  -3    5.79    0.71
 -20   2  -3    5.15    0.61
   2  20  -3    5.54    0.67
 -20   2   3    6.23    0.70
   2  20   3    6.80    0.66
   3  20  -3   66.39    2.13
  -3 -20  -3   60.75    2.15
 -20   3  -3   61.15    2.02
   3  20   3   60.51    2.05
 -20   3   3   62.14    2.12
   4  20  -3    3.51    0.62
 -20   4  -3    4.25    0.58
  -4 -20  -3    3.24    0.65
 -20   4   3    4.00    0.63
   0   0  -4   43.54    1.13
   0   0  -4   44.53    1.13
   0   0   4   44.37    1.12
   0  -1  -4   37.65    1.03
   0  -1  -4   40.11    1.03
  -1   0  -4   39.64    1.01
   1   0  -4   40.68    1.04
   1   0  -4   39.37    1.03
   0   1  -4   40.60    1.02
   0   1  -4   39.04    1.02
   0   1   4   41.00    1.02
  -1   0   4   39.55    1.03
   0  -1   4   41.00    1.00
  -1  -1  -4    8.26    0.26
   1   1  -4    8.40    0.27
  -1  -1  -4    8.54    0.26
   1   1  -4    8.69    0.28
  -1   1  -4    8.52    0.23
  -1   1  -4    8.63    0.24
   1  -1  -4    8.58    0.28
   1  -1  -4    8.71    0.28
  -1  -1   4    8.85    0.28
   1   1   4    9.37    0.24
  -1   2  -4  208.76    5.29
  -1   2  -4  217.05    5.30
  -2  -1  -4  207.05    5.31
   1  -2  -4  208.94    5.33
   1  -2  -4  210.36    5.28
   2   1  -4  215.46    5.29
  -2  -1  -4  215.25    5.28
   2   1  -4  212.65    5.39
  -1   2   4  208.92    5.27
  -2  -1   4  211.24    5.40
   0   2  -4   10.63    0.31
  -2   0  -4   10.78    0.28
   0  -2  -4   10.75    0.33
   2   0  -4   10.73    0.34
   0  -2  -4   10.67    0.34
   0   2  -4   10.73    0.32
  -2   0  -4   10.73    0.29
   2   0  -4   10.41    0.34
  -2   0   4   10.77    0.34
   0  -2   4   10.77    0.29
   1   2  -4    0.68    0.09
  -1  -2  -4    1.15    0.10
  -1  -2  -4    0.49    0.08
   2  -1  -4    0.52    0.10
   1   2  -4    0.49    0.08
  -1  -2   4    0.74    0.09
  -2   1   4    0.60    0.10
   1   2   4    0.65    0.08
   2   2  -4    0.72    0.10
   2  -2  -4    0.63    0.11
  -2  -2  -4    0.61    0.08
   2  -2  -4    0.53    0.10
  -2   2  -4    0.78    0.05
  -2  -2  -4    0.53    0.08
   2   2  -4    0.55    0.10
  -2   2  -4    0.65    0.05
  -2  -2   4    0.68    0.10
  -2   2   4    0.71    0.10
   2   2   4    0.74    0.07
  -2   3  -4   14.30    0.40
   3   2  -4   14.35    0.46
   2  -3  -4   14.77    0.46
   3   2  -4   13.64    0.45
  -3  -2  -4   14.71    0.42
  -2   3  -4   14.46    0.39
   2  -3  -4   14.91    0.46
  -3  -2  -4   14.38    0.43
  -2   3   4   14.45    0.45
   3   2   4   14.34    0.40
  -3  -2   4   14.13    0.47
  -3  -1  -4   94.12    2.32
  -1   3  -4   91.70    2.32
   1  -3  -4   93.08    2.36
  -1   3  -4   94.26    2.32
   3   1  -4   90.21    2.36
   3   1  -4   96.94    2.37
  -3  -1  -4   90.76    2.32
   1  -3  -4   86.87    2.36
  -1   3   4   93.04    2.35
  -3  -1   4   92.66    2.37
   0  -3  -4    2.63    0.18
   0   3  -4    2.96    0.16
  -3   0  -4    2.79    0.11
   3   0  -4    2.98    0.19
   0   3  -4    2.66    0.16
  -3   0  -4    2.98    0.11
   3   0  -4    2.40    0.19
   0  -3  -4    2.79    0.18
   0   3   4    2.91    0.17
   0  -3   4    2.70    0.12
  -3   0   4    2.54    0.18
  -1  -3  -4    5.32    0.23
   1   3  -4    5.49    0.23
  -1  -3  -4    5.22    0.23
   1   3  -4    5.33    0.23
   3  -1  -4    5.72    0.24
   3  -1  -4    5.03    0.25
  -3   1   4    5.40    0.25
   1   3   4    5.28    0.21
  -1  -3   4    5.26    0.21
  -3   2  -4   47.95    1.21
   3  -2  -4   48.43    1.29
   3  -2  -4   50.36    1.29
  -2  -3  -4   49.08    1.26
   2   3  -4   47.26    1.27
  -3   2  -4   48.79    1.21
  -2  -3  -4   47.87    1.27
   2   3  -4   49.75    1.29
  -2  -3   4   48.43    1.28
  -3   2   4   46.31    1.28
   2   3   4   47.46    1.25
  -3   3  -4   88.75    2.25
   3   3  -4   94.18    2.33
   3  -3  -4   85.63    2.31
  -3   3  -4   91.14    2.25
   3   3  -4   88.07    2.31
  -3  -3  -4   88.43    2.30
  -3  -3  -4   93.29    2.29
   3  -3  -4   93.12    2.32
  -3   3   4   88.74    2.31
   3   3   4   90.14    2.27
  -3  -3   4   87.23    2.32
   3  -4  -4  131.79    3.40
   4   3  -4  139.44    3.42
  -3   4  -4  132.58    3.34
   3  -4  -4  135.07    3.40
  -3   4  -4  139.03    3.34
   4   3  -4  129.23    3.40
  -4  -3  -4  130.76    3.38
  -4  -3  -4  136.96    3.37
  -3   4   4  130.76    3.39
  -4  -3   4  128.80    3.41
   4   3   4  133.47    3.35
  -2   4  -4  238.19    6.01
  -4  -2  -4  256.02    5.98
  -2   4  -4  232.44    5.99
  -4  -2  -4  226.75    5.93
   2  -4  -4  236.74    5.96
   4   2  -4  255.92    5.98
   4   2  -4  226.91    5.96
   2  -4  -4  232.68    5.96
  -4  -2   4  231.83    5.97
  -2   4   4  238.03    5.95
   4   2   4  239.88    5.92
   2  -4   4  238.25    5.91
   4   1  -4   83.21    2.10
   4   1  -4   79.42    2.09
  -1   4  -4   79.78    2.05
  -4  -1  -4   79.73    2.05
   1  -4  -4   78.23    2.08
  -4  -1  -4   82.65    2.04
  -1   4  -4   82.02    2.05
   1  -4  -4   81.76    2.08
   4   1   4   81.10    2.01
   1  -4   4   81.52    2.02
  -4  -1   4   79.44    2.09
  -1   4   4   79.96    2.08
   4   0  -4    7.92    0.33
   0   4  -4    8.14    0.29
   0  -4  -4    7.59    0.32
   0  -4  -4    8.23    0.31
  -4   0  -4    7.99    0.25
   0   4  -4    7.97    0.30
  -4   0  -4    7.78    0.25
   0  -4   4    8.06    0.26
  -4   0   4    7.81    0.32
   0   4   4    8.45    0.30
  -4   1  -4   56.86    1.44
   1   4  -4   56.35    1.50
   4  -1  -4   59.89    1.52
   1   4  -4   58.92    1.51
  -1  -4  -4   57.71    1.50
   4  -1  -4   55.89    1.51
  -4   1  -4   56.74    1.44
  -1  -4  -4   55.81    1.50
  -4   1   4   56.98    1.51
  -1  -4   4   57.94    1.48
   1   4   4   57.37    1.49
   4  -2  -4   26.42    0.78
  -4   2  -4   27.18    0.70
   4  -2  -4   28.18    0.78
  -2  -4  -4   25.94    0.76
   2   4  -4   26.63    0.78
  -4   2  -4   27.21    0.70
   2   4  -4   26.79    0.77
  -2  -4  -4   27.30    0.76
   2   4   4   27.20    0.74
  -4   2   4   26.84    0.78
  -2  -4   4   27.37    0.77
  -4   3  -4    3.09    0.15
  -3  -4  -4    2.58    0.20
   4  -3  -4    2.84    0.23
   3   4  -4    3.01    0.23
  -3  -4  -4    2.80    0.22
  -4   3  -4    3.21    0.14
   3   4  -4    3.10    0.23
   4  -3  -4    2.97    0.24
  -3  -4   4    2.71    0.21
  -4   3   4    2.84    0.22
   3   4   4    2.84    0.18
   4   4  -4   75.21    1.93
  -4  -4  -4   74.96    1.89
   4  -4  -4   69.86    1.91
   4   4  -4   70.04    1.91
  -4   4  -4   71.99    1.84
  -4  -4  -4   71.81    1.90
  -4   4  -4   73.96    1.84
   4   4   4   73.32    1.87
  -4  -4   4   71.85    1.92
  -4   4   4   71.95    1.91
   5   4  -4  171.47    4.19
  -5  -4  -4  169.99    4.14
   4  -5  -4  160.68    4.16
  -5  -4  -4  158.23    4.15
  -4   5  -4  162.90    4.10
  -4   5  -4  166.86    4.10
   5   4  -4  160.31    4.16
  -4   5   4  161.51    4.16
   4  -5   4  166.98    4.07
   5   4   4  161.87    4.11
  -5  -4   4  157.77    4.18
   3  -5  -4  549.25   14.33
  -5  -3  -4  573.77   14.11
  -3   5  -4  568.91   14.21
  -3   5  -4  579.69   14.19
  -5  -3  -4  546.25   14.24
   5   3  -4  589.70   14.29
   5   3  -4  553.38   14.35
   5   3   4  558.21   14.37
   3  -5   4  591.04   14.08
  -3   5   4  556.25   14.27
  -5  -3   4  546.70   14.06
  -2   5  -4  534.38   13.58
   2  -5  -4  556.26   13.51
  -5  -2  -4  518.06   13.52
   2  -5  -4  536.16   13.78
   5   2  -4  545.60   13.74
  -5  -2  -4  541.05   16.14
  -2   5  -4  536.82   13.52
   5   2  -4  542.56   13.40
  -2   5   4  537.97   13.45
   2  -5   4  545.30   13.43
  -5  -2   4  523.22   13.75
   5   2   4  541.08   13.41
   1  -5  -4  504.12   12.24
  -5  -1  -4  469.22   12.36
   5   1  -4  516.66   12.26
   5   1  -4  477.37   12.43
  -1   5  -4  501.41   12.39
  -5  -1  -4  502.65   12.39
   1  -5  -4  472.02   12.55
  -1   5  -4  483.25   12.38
   5   1   4  500.07   12.24
   1  -5   4  501.31   12.36
  -1   5   4  480.27   12.49
  -5  -1   4  496.63   12.53
   0  -5  -4   23.01    0.66
   0   5  -4   22.15    0.63
  -5   0  -4   21.39    0.59
   0   5  -4   20.52    0.63
  -5   0  -4   21.87    0.60
   0  -5  -4   21.38    0.66
   5   0  -4   22.45    0.67
   5   0  -4   20.28    0.66
  -5   0   4   21.45    0.66
   0  -5   4   21.47    0.60
   0   5   4   21.23    0.64
   5  -1  -4    4.69    0.29
  -1  -5  -4    4.85    0.28
   1   5  -4    4.86    0.27
  -1  -5  -4    5.63    0.27
  -5   1  -4    4.72    0.20
   5  -1  -4    4.98    0.28
   1   5  -4    5.33    0.27
  -5   1  -4    5.08    0.20
  -5   1   4    4.92    0.29
   1   5   4    5.60    0.26
  -1  -5   4    5.14    0.24
  -2  -5  -4   29.36    0.87
   2   5  -4   33.00    0.89
  -2  -5  -4   31.85    0.87
  -5   2  -4   31.09    0.80
   2   5  -4   28.64    0.87
   5  -2  -4   29.68    0.88
  -5   2  -4   29.66    0.80
   2   5   4   29.82    0.85
  -5   2   4   30.49    0.88
  -2  -5   4   31.11    0.87
  -3  -5  -4    5.28    0.30
  -3  -5  -4    5.76    0.28
  -5   3  -4    5.44    0.22
   3   5  -4    5.24    0.30
   5  -3  -4    4.67    0.30
   3   5  -4    4.64    0.30
  -5   3  -4    5.83    0.21
  -3  -5   4    5.21    0.31
  -5   3   4    4.90    0.30
   3   5   4    5.37    0.26
  -4  -5  -4    2.21    0.19
  -5   4  -4    1.50    0.13
   5  -4  -4    0.72    0.16
   4   5  -4    0.78    0.16
  -5   4  -4    1.32    0.12
  -4  -5  -4    1.11    0.17
   4   5  -4    1.09    0.17
  -4  -5   4    1.17    0.18
   4   5   4    1.35    0.14
  -5   4   4    1.26    0.19
   5   5  -4   63.49    1.72
  -5  -5  -4   59.98    1.70
  -5  -5  -4   67.05    1.70
  -5   5  -4   65.01    1.65
  -5   5  -4   63.00    1.65
   5  -5  -4   63.18    1.72
   5   5   4   62.81    1.67
  -5   5   4   63.20    1.71
  -5  -5   4   61.30    1.73
   5  -5   4   65.66    1.61
   5  -6  -4    0.17    0.18
  -5   6  -4   -0.03    0.12
  -6  -5  -4    0.12    0.14
   6   5  -4    0.12    0.16
  -5   6  -4    0.18    0.10
  -5   6   4    0.14    0.15
   5  -6   4    0.15    0.08
  -6  -5   4    0.05    0.15
   6   4  -4   61.49    1.75
  -6  -4  -4   62.23    1.73
  -4   6  -4   66.49    1.69
  -4   6  -4   65.85    1.69
  -6  -4  -4   67.96    1.73
   4  -6  -4   61.63    1.74
   6   4   4   64.43    1.69
   4  -6   4   66.82    1.65
  -4   6   4   65.55    1.74
  -6  -4   4   63.68    1.76
   6   3  -4  410.72   10.45
  -3   6  -4  422.55   10.46
  -6  -3  -4  397.17   10.40
   3  -6  -4  394.21   10.43
  -3   6  -4  416.47   10.36
  -6  -3  -4  430.15   10.29
   6   3   4  417.98   10.29
  -3   6   4  405.59   10.30
   3  -6   4  420.86   11.57
  -6  -3   4  413.40   10.33
   2  -6  -4  259.24    6.43
  -2   6  -4  248.04    6.46
   6   2  -4  253.11    6.43
  -6  -2  -4  244.39    6.39
  -6  -2  -4  264.82    6.40
  -2   6  -4  265.39    6.39
   2  -6   4  259.06    6.36
   6   2   4  258.23    6.36
  -2   6   4  248.93    6.41
  -6  -2   4  252.85    6.44
   1  -6  -4  246.53    5.91
  -1   6  -4  227.01    5.87
  -1   6  -4  241.99    5.87
   1  -6  -4  231.82    5.90
  -6  -1  -4  236.81    5.86
   6   1  -4  232.13    5.91
  -6  -1  -4  233.51    5.86
   1  -6   4  236.50    5.84
  -6  -1   4  225.10    5.91
  -1   6   4  228.97    5.89
   6   1   4  237.28    5.82
   0  -6  -4   65.73    1.67
  -6   0  -4   60.96    1.61
   0   6  -4   61.57    1.65
   0  -6  -4   62.85    1.68
   0   6  -4   64.46    1.65
   6   0  -4   61.42    1.68
  -6   0  -4   62.76    1.62
   0   6   4   63.68    1.66
   6   0   4   63.29    1.58
   0  -6   4   61.79    1.62
  -6   0   4   59.02    1.67
   1   6  -4    7.46    0.34
  -1  -6  -4    7.07    0.34
  -6   1  -4    7.19    0.27
  -6   1  -4    6.74    0.27
   1   6  -4    8.15    0.34
   6  -1  -4    7.67    0.37
  -1  -6  -4    6.85    0.36
  -6   1   4    8.00    0.36
  -1  -6   4    7.19    0.30
   1   6   4    6.63    0.33
  -2  -6  -4   40.30    1.15
  -2  -6  -4   42.09    1.15
  -6   2  -4   41.38    1.08
   2   6  -4   42.31    1.16
  -6   2  -4   39.95    1.08
   6  -2  -4   39.71    1.16
   2   6  -4   42.69    1.16
   2   6   4   41.20    1.13
  -6   2   4   41.07    1.16
  -2  -6   4   41.55    1.14
   3   6  -4    1.17    0.18
   3   6  -4    1.28    0.17
   6  -3  -4    1.34    0.20
  -3  -6  -4    1.33    0.19
  -6   3  -4    1.08    0.12
  -3  -6  -4    1.39    0.18
  -6   3  -4    1.03    0.11
  -3  -6   4    1.70    0.20
   3   6   4    0.90    0.15
  -6   3   4    0.90    0.17
  -6   4  -4   34.02    0.90
  -6   4  -4   32.99    0.91
   4   6  -4   31.88    0.98
  -4  -6  -4   34.19    0.97
  -4  -6  -4   31.47    0.98
   6  -4  -4   34.32    0.99
   4   6  -4   35.38    1.00
   4   6   4   32.96    0.94
  -4  -6   4   32.77    1.00
   6  -4   4   33.98    0.87
  -6   4   4   33.18    0.98
  -5  -6  -4    4.81    0.34
   5   6  -4    5.46    0.35
  -6   5  -4    4.84    0.26
  -5  -6  -4    5.45    0.32
  -6   5  -4    5.03    0.24
   6  -5  -4    4.16    0.33
  -6   5   4    5.06    0.34
   5   6   4    4.88    0.27
  -5  -6   4    4.47    0.36
   6  -5   4    4.60    0.20
   6   6  -4    4.12    0.35
  -6  -6  -4    4.54    0.33
  -6  -6  -4    4.60    0.36
   6  -6  -4    4.33    0.35
  -6   6  -4    4.47    0.25
  -6   6  -4    4.69    0.27
  -6   6   4    4.71    0.36
  -6  -6   4    3.59    0.30
   6   6   4    4.75    0.28
   6  -6   4    4.30    0.20
   6  -7  -4   48.06    1.38
  -7  -6  -4   47.07    1.38
  -6   7  -4   47.58    1.31
   7   6  -4   46.08    1.39
  -7  -6  -4   50.35    1.37
  -6   7  -4   50.07    1.31
   6  -7   4   48.60    1.27
  -7  -6   4   48.68    1.41
  -6   7   4   48.81    1.38
   7   6   4   44.42    1.31
  -5   7  -4    6.21    0.32
   5  -7  -4    5.85    0.39
  -7  -5  -4    6.05    0.38
  -7  -5  -4    6.81    0.37
   7   5  -4    5.66    0.38
  -5   7  -4    6.49    0.30
  -7  -5   4    6.32    0.40
   7   5   4    5.80    0.31
  -5   7   4    5.77    0.38
   5  -7   4    6.04    0.26
  -4   7  -4    4.70    0.25
  -7  -4  -4    4.49    0.33
   4  -7  -4    4.50    0.34
  -7  -4  -4    4.33    0.30
  -4   7  -4    4.40    0.28
   7   4  -4    5.65    0.37
  -4   7   4    4.64    0.34
   4  -7   4    4.72    0.22
  -7  -4   4    4.07    0.35
   7   4   4    4.50    0.25
  -7  -3  -4  101.40    2.66
   7   3  -4  101.65    2.69
  -3   7  -4  106.59    2.64
  -7  -3  -4  108.11    2.67
  -3   7  -4  100.71    2.64
   3  -7  -4   99.56    2.68
  -3   7   4   99.01    2.67
  -7  -3   4  102.64    2.71
   3  -7   4  102.92    2.60
   7   3   4  103.56    2.62
  -2   7  -4  108.28    2.80
  -7  -2  -4  108.84    2.81
   7   2  -4  108.76    2.85
   2  -7  -4  104.71    2.84
  -2   7  -4  112.69    2.80
  -7  -2  -4  114.61    2.81
  -2   7   4  106.51    2.83
   2  -7   4  111.06    2.77
  -7  -2   4  106.12    2.85
   7   2   4  111.42    2.77
   1  -7  -4  157.53    4.09
  -1   7  -4  169.36    4.06
  -1   7  -4  153.64    4.06
  -7  -1  -4  157.53    4.04
   7   1  -4  158.45    4.09
  -7  -1  -4  164.89    4.05
   1  -7   4  161.39    4.03
   7   1   4  164.54    4.01
  -7  -1   4  155.63    4.09
  -1   7   4  157.29    4.08
   0  -7  -4   37.91    1.11
  -7   0  -4   38.45    1.05
  -7   0  -4   40.42    1.06
   7   0  -4   37.32    1.11
   0   7  -4   37.15    1.08
   0   7  -4   41.89    1.10
   7   0   4   38.67    1.01
   0  -7   4   39.55    1.06
   0   7   4   37.56    1.09
   1   7  -4    0.36    0.14
   7  -1  -4    0.42    0.17
   1   7  -4    0.21    0.14
  -7   1  -4    0.23    0.11
  -1  -7  -4    0.40    0.17
  -7   1  -4    0.38    0.11
   7  -1   4    0.35    0.08
  -1  -7   4    0.28    0.12
  -7   1   4    0.27    0.16
   1   7   4    0.21    0.14
   2   7  -4    7.85    0.38
   2   7  -4    7.85    0.37
  -2  -7  -4    6.91    0.39
   7  -2  -4    7.40    0.39
  -7   2  -4    7.47    0.29
  -7   2  -4    6.98    0.29
  -2  -7  -4    7.20    0.36
  -2  -7   4    7.94    0.35
  -7   2   4    7.76    0.38
   2   7   4    7.75    0.35
   7  -2   4    7.63    0.25
   3   7  -4    0.54    0.16
  -3  -7  -4    0.41    0.18
   3   7  -4    0.54    0.17
  -7   3  -4    0.48    0.10
  -7   3  -4    0.54    0.11
  -3  -7  -4    0.57    0.16
   7  -3  -4    0.71    0.18
   3   7   4    0.36    0.14
  -7   3   4    0.69    0.17
   7  -3   4    0.61    0.09
  -3  -7   4    0.89    0.17
  -7   4  -4   19.21    0.58
   7  -4  -4   18.75    0.67
   4   7  -4   19.40    0.67
  -4  -7  -4   18.35    0.66
  -7   4  -4   19.93    0.58
  -4  -7  -4   20.17    0.65
  -7   4   4   19.09    0.66
   4   7   4   19.25    0.62
   7  -4   4   19.23    0.54
  -4  -7   4   19.61    0.68
  -5  -7  -4    0.26    0.16
   7  -5  -4    0.19    0.18
   5   7  -4    0.44    0.18
  -7   5  -4    0.28    0.11
  -7   5  -4    0.28    0.13
  -5  -7  -4    0.22    0.19
  -5  -7   4    0.29    0.19
  -7   5   4    0.29    0.19
   5   7   4    0.07    0.13
   7  -5   4    0.42    0.09
  -7   6  -4    0.43    0.15
   6   7  -4    0.33    0.19
  -6  -7  -4    1.01    0.22
   7  -6  -4    0.27    0.19
  -6  -7  -4    0.51    0.18
  -7   6  -4    0.50    0.13
   7  -6   4    0.36    0.10
  -7   6   4    0.17    0.19
  -6  -7   4    0.12    0.20
   6   7   4    0.31    0.14
   7  -7  -4   30.07    0.96
   7   7  -4   29.95    0.97
  -7  -7  -4   28.31    0.97
  -7   7  -4   30.94    0.87
  -7   7  -4   29.65    0.88
  -7  -7   4   29.89    0.99
  -7   7   4   28.72    0.95
   7   7   4   29.77    0.90
   7  -7   4   30.21    0.83
   8   7  -4    2.25    0.30
  -8  -7  -4    1.66    0.28
  -7   8  -4    3.09    0.24
   7  -8  -4    1.78    0.26
  -7   8  -4    2.21    0.23
  -8  -7   4    2.12    0.29
   7  -8   4    2.24    0.18
   8   7   4    2.03    0.23
  -7   8   4    1.93    0.26
   6  -8  -4    0.06    0.21
   8   6  -4    0.36    0.22
  -8  -6  -4    0.18    0.21
  -8  -6  -4   -0.03    0.17
  -6   8  -4    0.46    0.17
  -6   8  -4    0.29    0.15
   6  -8   4    0.08    0.12
  -6   8   4    0.34    0.21
   8   6   4    0.05    0.14
  -8  -6   4    0.24    0.20
   5  -8  -4   13.83    0.58
  -8  -5  -4   13.48    0.57
  -5   8  -4   14.63    0.50
  -5   8  -4   14.12    0.52
  -8  -5  -4   15.08    0.56
   8   5  -4   13.74    0.58
  -5   8   4   14.04    0.57
   8   5   4   14.15    0.50
  -8  -5   4   13.79    0.60
   5  -8   4   14.39    0.45
  -4   8  -4    8.15    0.35
   4  -8  -4    7.24    0.43
  -4   8  -4    7.63    0.37
  -8  -4  -4    8.16    0.40
   8   4  -4    8.02    0.45
  -8  -4  -4    8.13    0.42
  -8  -4   4    8.23    0.45
   4  -8   4    8.10    0.31
   8   4   4    7.97    0.34
  -4   8   4    7.39    0.42
  -8  -3  -4   25.37    0.75
   8   3  -4   23.63    0.79
  -3   8  -4   24.81    0.72
   3  -8  -4   23.79    0.78
  -3   8  -4   23.89    0.73
  -8  -3  -4   22.98    0.75
  -8  -3   4   23.80    0.80
   8   3   4   22.12    0.69
  -3   8   4   24.66    0.78
   3  -8   4   22.59    0.68
   2  -8  -4    0.17    0.16
  -8  -2  -4   -0.08    0.11
  -2   8  -4    0.23    0.15
  -8  -2  -4    0.21    0.14
   8   2  -4    0.12    0.17
  -2   8  -4    0.29    0.13
   8   2   4    0.35    0.10
   2  -8   4    0.19    0.10
  -8  -2   4    0.24    0.17
  -2   8   4    0.11    0.16
  -1   8  -4    8.77    0.37
   1  -8  -4    7.26    0.41
  -8  -1  -4    8.56    0.35
   8   1  -4    8.24    0.43
  -8  -1  -4    8.12    0.36
  -1   8  -4    7.78    0.38
   8   1   4    8.41    0.30
   1  -8   4    8.28    0.33
  -8  -1   4    8.61    0.41
  -1   8   4    8.13    0.40
  -8   0  -4    2.46    0.21
   0   8  -4    2.76    0.23
   0   8  -4    2.99    0.23
   8   0  -4    2.40    0.25
  -8   0  -4    2.33    0.19
   0  -8  -4    2.06    0.24
   8   0   4    2.19    0.17
   0  -8   4    2.29    0.18
   0   8   4    2.28    0.21
  -8   0   4    2.36    0.24
  -8   1  -4    1.33    0.15
  -1  -8  -4    1.16    0.20
  -8   1  -4    1.11    0.15
   1   8  -4    1.39    0.20
   8  -1  -4    1.49    0.22
   1   8  -4    1.62    0.19
  -8   1   4    1.22    0.20
   8  -1   4    1.59    0.12
  -1  -8   4    1.34    0.17
   1   8   4    1.09    0.18
  -8   2  -4   27.03    0.76
  -8   2  -4   25.62    0.76
   8  -2  -4   25.44    0.84
  -2  -8  -4   25.93    0.85
   2   8  -4   24.94    0.83
   2   8  -4   28.75    0.84
  -8   2   4   27.07    0.84
   8  -2   4   26.27    0.72
   2   8   4   25.79    0.81
  -2  -8   4   26.96    0.81
  -8   3  -4   60.00    1.65
  -3  -8  -4   61.08    1.73
   3   8  -4   71.91    1.80
   3   8  -4   63.74    1.73
  -8   3  -4   63.37    1.65
   8  -3  -4   60.83    1.72
  -8   3   4   60.98    1.72
   8  -3   4   62.32    1.61
  -3  -8   4   62.12    1.72
   3   8   4   62.09    1.69
  -4  -8  -4    7.83    0.44
   8  -4  -4    7.53    0.43
  -8   4  -4    7.99    0.35
   4   8  -4    7.55    0.43
  -8   4  -4    7.85    0.33
   8  -4   4    7.92    0.29
   4   8   4    8.31    0.39
  -8   4   4    8.39    0.43
  -4  -8   4    8.20    0.44
   5   8  -4    9.51    0.49
  -8   5  -4    9.78    0.38
   8  -5  -4    9.53    0.48
  -5  -8  -4    9.54    0.49
  -8   5  -4    8.99    0.39
   5   8   4    9.39    0.43
  -8   5   4    9.74    0.47
  -5  -8   4    9.06    0.50
   8  -5   4    9.59    0.33
  -8   6  -4   11.79    0.46
   8  -6  -4   10.99    0.54
   6   8  -4   11.04    0.55
  -8   6  -4   11.93    0.43
  -6  -8  -4   10.60    0.56
  -8   6   4   11.93    0.53
  -6  -8   4   11.84    0.58
   8  -6   4   11.69    0.39
   6   8   4   10.94    0.47
   8  -7  -4    3.89    0.33
  -8   7  -4    4.80    0.31
  -8   7  -4    4.80    0.35
   7   8  -4    4.90    0.38
  -7  -8  -4    3.71    0.33
  -7  -8   4    3.67    0.35
   8  -7   4    4.87    0.26
   7   8   4    4.34    0.34
  -8   7   4    3.21    0.31
   8  -8  -4   44.70    1.37
   8   8  -4   45.30    1.39
  -8   8  -4   45.83    1.30
  -8  -8  -4   45.42    1.39
  -8   8  -4   47.92    1.30
   8  -8   4   45.06    1.24
  -8   8   4   44.32    1.37
   8   8   4   46.50    1.32
  -8  -8   4   45.47    1.41
   9   8  -4   33.25    1.12
   8  -9  -4   34.08    1.10
  -9  -8  -4   34.66    1.13
  -8   9  -4   32.74    1.03
  -8   9   4   32.17    1.10
   8  -9   4   32.84    0.96
   9   8   4   33.93    1.03
  -9  -8   4   32.74    1.15
   7  -9  -4   32.18    1.06
   9   7  -4   31.17    1.07
  -7   9  -4   34.75    0.99
  -9  -7  -4   30.36    1.07
  -7   9  -4   32.03    0.99
  -9  -7   4   31.09    1.10
  -7   9   4   32.51    1.06
   7  -9   4   34.09    0.94
   9   7   4   33.48    0.99
  -9  -6  -4    0.50    0.23
  -9  -6  -4    0.25    0.19
   9   6  -4    0.27    0.23
  -6   9  -4    0.23    0.19
  -6   9  -4    0.54    0.16
   6  -9  -4    0.29    0.23
   6  -9   4    0.30    0.14
  -6   9   4    0.52    0.23
  -9  -6   4    0.41    0.23
   9   6   4    0.22    0.16
  -9  -5  -4    4.10    0.34
  -5   9  -4    4.53    0.35
   5  -9  -4    3.83    0.32
  -5   9  -4    4.98    0.31
  -9  -5  -4    3.96    0.33
   9   5  -4    4.11    0.35
   5  -9   4    4.48    0.26
  -9  -5   4    3.46    0.33
  -5   9   4    3.24    0.31
   9   5   4    4.29    0.30
  -9  -4  -4    0.42    0.17
  -4   9  -4    0.37    0.18
   4  -9  -4    0.20    0.20
   9   4  -4    0.27    0.21
  -4   9  -4    0.66    0.15
  -9  -4  -4    0.18    0.19
   4  -9   4    0.50    0.12
   9   4   4    0.70    0.14
  -9  -4   4    0.24    0.22
  -4   9   4    0.54    0.21
  -9  -3  -4    1.73    0.21
  -3   9  -4    2.00    0.20
  -3   9  -4    1.88    0.21
  -9  -3  -4    2.07    0.23
   3  -9  -4    1.99    0.26
   9   3  -4    2.08    0.28
   3  -9   4    2.00    0.18
   9   3   4    2.51    0.19
  -9  -3   4    1.56    0.24
  -3   9   4    2.10    0.25
   2  -9  -4   22.56    0.77
  -2   9  -4   22.71    0.72
  -9  -2  -4   21.41    0.72
  -2   9  -4   21.81    0.73
  -9  -2  -4   23.98    0.72
   9   2  -4   21.27    0.77
   2  -9   4   23.00    0.68
  -9  -2   4   21.99    0.78
  -2   9   4   22.23    0.75
   9   2   4   22.39    0.67
  -1   9  -4    6.92    0.39
  -9  -1  -4    7.38    0.37
   1  -9  -4    7.48    0.43
  -1   9  -4    8.39    0.39
   9   1  -4    6.78    0.43
  -9  -1  -4    7.51    0.35
  -1   9   4    7.24    0.40
   1  -9   4    7.26    0.33
   9   1   4    7.41    0.31
   0  -9  -4   15.62    0.62
   0   9  -4   15.46    0.59
   0   9  -4   17.11    0.59
   9   0  -4   16.27    0.62
  -9   0  -4   15.20    0.55
  -9   0  -4   16.92    0.54
  -9   0   4   15.71    0.61
   0  -9   4   15.57    0.54
   9   0   4   15.79    0.49
   0   9   4   15.73    0.59
  -9   1  -4    8.93    0.36
   9  -1  -4    7.77    0.45
  -1  -9  -4    8.97    0.47
  -9   1  -4    8.33    0.37
   1   9  -4    8.52    0.43
   1   9  -4    9.89    0.43
   1   9   4    8.62    0.42
   9  -1   4    8.69    0.32
  -1  -9   4    8.61    0.39
   2   9  -4   10.78    0.50
  -9   2  -4   11.72    0.42
   2   9  -4   12.60    0.50
  -9   2  -4   11.29    0.44
  -2  -9  -4   11.07    0.54
   9  -2  -4   12.22    0.53
  -9   2   4   11.45    0.52
  -2  -9   4   11.02    0.48
   2   9   4   11.20    0.48
   9  -2   4   12.06    0.39
  -3  -9  -4    5.17    0.37
   9  -3  -4    5.18    0.40
  -9   3  -4    5.04    0.31
   3   9  -4    4.96    0.39
  -9   3  -4    5.02    0.27
   9  -3   4    4.89    0.24
   3   9   4    4.72    0.35
  -3  -9   4    4.87    0.36
  -9   4  -4   37.13    1.01
  -9   4  -4   35.03    1.02
  -4  -9  -4   36.14    1.11
   4   9  -4   34.62    1.10
   9  -4  -4   35.39    1.10
  -9   4   4   36.26    1.10
   9  -4   4   36.81    0.98
  -4  -9   4   35.71    1.11
   4   9   4   35.31    1.06
  -9   5  -4   17.32    0.56
   9  -5  -4   16.35    0.65
  -9   5  -4   16.03    0.57
   5   9  -4   16.95    0.67
  -5  -9  -4   15.78    0.66
   5   9   4   15.58    0.60
  -9   5   4   16.65    0.65
   9  -5   4   16.09    0.51
  -5  -9   4   16.56    0.68
  -9   6  -4   36.33    1.03
  -9   6  -4   35.02    1.04
   9  -6  -4   35.14    1.12
   6   9  -4   35.64    1.14
  -6  -9  -4   35.08    1.13
   9  -6   4   36.76    0.99
   6   9   4   35.96    1.07
  -9   6   4   35.74    1.12
  -6  -9   4   34.25    1.15
  -9   7  -4  162.41    4.24
   9  -7  -4  164.88    4.31
  -7  -9  -4  160.03    4.33
  -9   7  -4  174.49    4.25
   7   9  -4  162.14    4.33
   7   9   4  167.69    4.28
   9  -7   4  170.11    4.20
  -9   7   4  166.88    4.31
  -7  -9   4  164.19    4.36
   8   9  -4   69.88    2.01
  -8  -9  -4   68.13    2.00
  -9   8  -4   74.14    1.93
   9  -8  -4   69.13    1.99
  -9   8  -4   69.97    1.92
   8   9   4   71.17    1.94
  -8  -9   4   69.44    2.04
  -9   8   4   71.00    2.00
   9  -8   4   71.25    1.86
  -9  -9  -4  160.49    4.31
  -9   9  -4  168.03    4.23
   9  -9  -4  164.05    4.30
   9   9  -4  163.10    4.32
   9   9   4  162.75    4.24
  -9   9   4  165.49    4.30
  -9  -9   4  162.64    4.34
  -9  10  -4   44.91    1.35
   9 -10  -4   46.48    1.43
  10   9  -4   43.23    1.44
 -10  -9  -4   45.23    1.45
 -10  -9   4   43.48    1.48
  10   9   4   44.02    1.34
  -9  10   4   46.90    1.43
  -8  10  -4   18.10    0.71
 -10  -8  -4   18.28    0.80
  10   8  -4   17.81    0.81
   8 -10  -4   17.54    0.77
 -10  -8   4   17.17    0.81
  -8  10   4   17.92    0.77
  10   8   4   18.20    0.69
   7 -10  -4   16.18    0.71
  10   7  -4   15.37    0.72
  -7  10  -4   14.97    0.64
 -10  -7  -4   16.32    0.73
   7 -10   4   15.63    0.56
  10   7   4   15.50    0.61
 -10  -7   4   15.82    0.75
  -7  10   4   15.83    0.70
  -6  10  -4    3.86    0.31
  10   6  -4    3.48    0.35
 -10  -6  -4    3.76    0.35
  -6  10  -4    4.22    0.34
   6 -10  -4    3.43    0.34
  10   6   4    4.27    0.34
   6 -10   4    3.87    0.27
 -10  -6   4    4.34    0.39
  -6  10   4    4.50    0.38
  -5  10  -4   13.85    0.53
 -10  -5  -4   12.74    0.57
   5 -10  -4   13.55    0.61
 -10  -5  -4   13.60    0.62
  10   5  -4   13.72    0.63
  -5  10  -4   12.05    0.54
 -10  -5   4   13.04    0.64
  10   5   4   13.86    0.51
   5 -10   4   12.99    0.48
  -5  10   4   13.36    0.61
  -4  10  -4   54.58    1.47
 -10  -4  -4   55.10    1.50
  -4  10  -4   52.16    1.47
 -10  -4  -4   51.85    1.50
  10   4  -4   51.82    1.54
   4 -10  -4   49.76    1.52
  10   4   4   51.77    1.43
   4 -10   4   51.91    1.42
  -4  10   4   51.16    1.51
 -10  -4   4   53.75    1.55
 -10  -3  -4    1.29    0.23
 -10  -3  -4    1.21    0.20
  10   3  -4    0.86    0.24
  -3  10  -4    1.72    0.21
   3 -10  -4    0.43    0.21
  -3  10  -4    0.85    0.20
   3 -10   4    1.20    0.16
  -3  10   4    1.08    0.24
  10   3   4    1.19    0.17
 -10  -3   4    0.72    0.22
  -2  10  -4    1.69    0.21
 -10  -2  -4    1.30    0.22
 -10  -2  -4    1.77    0.21
  10   2  -4    1.67    0.27
  -2  10  -4    1.76    0.23
   2 -10  -4    1.65    0.24
  -2  10   4    1.56    0.25
  10   2   4    2.01    0.18
 -10  -2   4    1.93    0.29
   2 -10   4    1.66    0.18
 -10  -1  -4   18.09    0.60
  -1  10  -4   18.95    0.63
  -1  10  -4   15.78    0.62
   1 -10  -4   16.12    0.66
 -10  -1  -4   17.40    0.61
  10   1  -4   17.02    0.67
 -10  -1   4   16.43    0.66
   1 -10   4   16.69    0.57
  -1  10   4   16.27    0.64
  10   1   4   16.78    0.54
 -10   0  -4    6.09    0.36
   0  10  -4    5.69    0.40
  10   0  -4    6.06    0.43
   0  10  -4    6.85    0.38
   0 -10  -4    6.04    0.44
 -10   0  -4    6.39    0.34
   0  10   4    6.47    0.41
  10   0   4    5.81    0.28
   0 -10   4    5.85    0.34
 -10   0   4    5.79    0.43
  10  -1  -4   11.95    0.55
  -1 -10  -4   12.06    0.57
 -10   1  -4   12.20    0.49
 -10   1  -4   12.44    0.46
   1  10  -4   11.87    0.54
  -1 -10   4   11.89    0.49
 -10   1   4   11.59    0.55
  10  -1   4   11.90    0.42
   1  10   4   12.08    0.53
 -10   2  -4    4.39    0.28
   2  10  -4    3.95    0.33
  10  -2  -4    3.73    0.32
 -10   2  -4    4.06    0.31
  -2 -10  -4    3.04    0.32
  10  -2   4    4.48    0.25
  -2 -10   4    4.76    0.36
   2  10   4    4.53    0.37
 -10   3  -4   21.72    0.66
   3  10  -4   20.13    0.75
 -10   3  -4   20.62    0.68
  10  -3  -4   19.33    0.75
  -3 -10  -4   21.37    0.79
  10  -3   4   20.13    0.62
 -10   3   4   20.55    0.75
   3  10   4   20.94    0.73
  -3 -10   4   20.69    0.74
  10  -4  -4    1.30    0.25
  -4 -10  -4    1.34    0.29
   4  10  -4    1.60    0.27
 -10   4  -4    1.72    0.18
 -10   4  -4    1.44    0.20
  10  -4   4    1.72    0.17
 -10   4   4    1.66    0.27
   4  10   4    1.37    0.22
  -4 -10   4    1.98    0.28
  -5 -10  -4    5.23    0.40
 -10   5  -4    4.94    0.36
 -10   5  -4    5.50    0.32
   5  10  -4    3.85    0.35
  10  -5  -4    4.44    0.35
  -5 -10   4    5.37    0.40
  10  -5   4    4.83    0.27
 -10   5   4    4.07    0.36
   5  10   4    5.21    0.39
 -10   6  -4   27.31    0.84
   6  10  -4   27.50    0.97
  -6 -10  -4   26.90    0.97
  10  -6  -4   27.66    0.94
 -10   6  -4   26.10    0.85
  10  -6   4   27.08    0.79
   6  10   4   27.62    0.89
 -10   6   4   26.70    0.95
  -6 -10   4   26.05    0.98
   7  10  -4   56.02    1.67
 -10   7  -4   54.04    1.57
  10  -7  -4   55.53    1.64
  -7 -10  -4   55.46    1.67
   7  10   4   58.02    1.60
  -7 -10   4   55.67    1.69
 -10   7   4   57.14    1.65
 -10   8  -4  112.38    2.97
  -8 -10  -4  112.68    3.07
  10  -8  -4  112.69    3.05
   8  10  -4  113.41    3.07
 -10   8   4  109.46    3.04
   8  10   4  114.87    3.00
  -8 -10   4  113.11    3.10
  -9 -10  -4  210.24    5.67
 -10   9  -4  218.41    5.59
  10  -9  -4  221.01    5.66
   9  10  -4  218.75    5.68
  -9 -10   4  219.99    5.71
   9  10   4  222.08    5.61
 -10   9   4  218.73    5.66
  10  10  -4   34.85    1.24
  10 -10  -4   34.44    1.22
 -10 -10  -4   34.29    1.24
 -10  10  -4   36.05    1.15
 -10  10   4   36.14    1.23
  10  10   4   34.77    1.14
 -10 -10   4   36.99    1.29
 -11 -10  -4    1.23    0.40
  10 -11  -4    0.70    0.35
  11  10  -4    0.99    0.34
 -10  11  -4    1.11    0.30
 -11 -10   4    1.26    0.39
 -10  11   4    1.11    0.34
   9 -11  -4    7.14    0.53
  11   9  -4    7.96    0.56
 -11  -9  -4    6.35    0.52
  -9  11  -4    6.77    0.46
  -9  11   4    7.07    0.60
 -11  -9   4    6.40    0.53
  11   9   4    6.57    0.52
  -8  11  -4   -0.28    0.23
   8 -11  -4    0.05    0.30
  11   8  -4    0.29    0.33
 -11  -8  -4    0.19    0.31
  11   8   4    0.10    0.22
  -8  11   4   -0.11    0.29
 -11  -8   4    0.59    0.34
   7 -11  -4   11.03    0.65
  -7  11  -4   10.15    0.58
  11   7  -4   11.41    0.67
 -11  -7  -4   11.82    0.66
  -7  11   4   10.68    0.63
  11   7   4   11.45    0.53
 -11  -7   4   10.66    0.68
  -6  11  -4   23.64    0.83
   6 -11  -4   23.92    0.90
 -11  -6  -4   23.96    0.88
  11   6  -4   22.61    0.89
  11   6   4   23.52    0.78
   6 -11   4   22.63    0.73
  -6  11   4   22.76    0.88
 -11  -6   4   22.78    0.91
   5 -11  -4    0.39    0.27
  -5  11  -4    0.38    0.22
 -11  -5  -4    0.26    0.25
  11   5  -4    0.17    0.26
  -5  11   4    0.66    0.26
 -11  -5   4    0.55    0.27
  11   5   4    0.61    0.17
   5 -11   4    0.60    0.17
  -4  11  -4   29.79    0.98
  11   4  -4   30.64    1.05
 -11  -4  -4   29.82    1.01
  -4  11  -4   32.70    0.99
   4 -11  -4   31.12    1.04
 -11  -4  -4   32.80    1.03
   4 -11   4   29.76    0.91
 -11  -4   4   31.35    1.06
  11   4   4   30.01    0.92
  -4  11   4   29.32    1.01
   3 -11  -4    0.37    0.24
 -11  -3  -4    0.24    0.22
  11   3  -4    0.60    0.25
  -3  11  -4    0.36    0.22
 -11  -3  -4    0.73    0.21
  -3  11  -4    0.37    0.19
   3 -11   4    0.51    0.16
 -11  -3   4    0.49    0.25
  -3  11   4    0.21    0.23
  11   3   4    0.69    0.16
  -2  11  -4    7.48    0.47
 -11  -2  -4    8.33    0.43
 -11  -2  -4    8.44    0.47
  11   2  -4    8.40    0.53
   2 -11  -4    8.59    0.51
  -2  11  -4    8.66    0.44
   2 -11   4    7.19    0.38
 -11  -2   4    6.93    0.51
  11   2   4    7.77    0.37
  -2  11   4    8.42    0.50
 -11  -1  -4   37.38    1.12
 -11  -1  -4   38.83    1.11
  -1  11  -4   36.74    1.14
   1 -11  -4   36.19    1.17
  11   1  -4   38.79    1.18
  11   1   4   36.65    1.05
 -11  -1   4   35.38    1.17
   1 -11   4   37.63    1.09
  -1  11   4   38.01    1.15
   0  11  -4    0.98    0.24
 -11   0  -4    0.96    0.21
 -11   0  -4    1.04    0.19
  11   0  -4    1.23    0.27
   0 -11  -4    1.04    0.28
 -11   0   4    1.06    0.27
  11   0   4    0.95    0.16
   0 -11   4    1.11    0.20
   0  11   4    1.57    0.25
   1  11  -4  127.69    3.49
 -11   1  -4  134.82    3.45
  -1 -11  -4  134.81    3.53
 -11   1  -4  138.41    3.45
  11  -1  -4  132.51    3.51
  11  -1   4  132.85    3.40
  -1 -11   4  133.17    3.47
   1  11   4  133.18    3.49
 -11   1   4  132.86    3.52
 -11   2  -4   26.54    0.82
   2  11  -4   25.98    0.90
 -11   2  -4   25.47    0.83
  -2 -11  -4   27.14    0.95
  11  -2  -4   26.35    0.91
  -2 -11   4   26.28    0.87
  11  -2   4   25.90    0.77
 -11   2   4   25.69    0.91
   2  11   4   26.08    0.88
 -11   3  -4   42.51    1.21
   3  11  -4   40.48    1.30
 -11   3  -4   42.27    1.23
  -3 -11  -4   42.38    1.33
  11  -3  -4   41.30    1.30
  11  -3   4   42.81    1.17
   3  11   4   44.24    1.28
  -3 -11   4   43.75    1.29
  -4 -11  -4    0.07    0.27
 -11   4  -4    0.47    0.16
 -11   4  -4    0.43    0.20
  11  -4  -4    0.55    0.27
   4  11  -4    0.30    0.25
  -4 -11   4    0.36    0.25
   4  11   4    0.40    0.21
 -11   4   4    0.15    0.24
  11  -4   4    0.19    0.14
 -11   5  -4   14.38    0.54
   5  11  -4   12.28    0.66
  -5 -11  -4   13.13    0.69
 -11   5  -4   13.50    0.56
  11  -5  -4   14.51    0.66
   5  11   4   14.06    0.61
  -5 -11   4   13.02    0.67
  11  -5   4   14.03    0.50
 -11   5   4   12.69    0.66
  -6 -11  -4    0.25    0.27
  11  -6  -4    0.09    0.28
 -11   6  -4    0.28    0.21
   6  11  -4    0.20    0.27
  -6 -11   4    0.12    0.29
   6  11   4    0.40    0.23
 -11   6   4   -0.22    0.26
  -7 -11  -4   70.65    2.05
 -11   7  -4   71.17    1.94
  11  -7  -4   68.84    2.01
   7  11  -4   70.98    2.04
   7  11   4   71.20    1.97
  -7 -11   4   68.06    2.05
 -11   7   4   71.45    2.02
  -8 -11  -4  122.65    3.38
  11  -8  -4  128.28    3.36
   8  11  -4  122.31    3.37
 -11   8   4  121.91    3.35
  -8 -11   4  127.24    3.40
   8  11   4  124.10    3.31
   9  11  -4   99.95    2.84
  -9 -11  -4  100.97    2.85
  11  -9  -4  102.86    2.82
 -11   9  -4  101.09    2.74
 -11   9   4  102.96    2.82
   9  11   4  104.79    2.77
  -9 -11   4  101.17    2.88
 -11  10  -4   61.88    1.81
 -10 -11  -4   62.36    1.93
  10  11  -4   62.14    1.92
  11 -10  -4   61.01    1.88
 -10 -11   4   66.19    1.98
  10  11   4   65.84    1.88
 -11  10   4   61.98    1.90
 -11 -11  -4    0.44    0.38
  11 -11  -4    0.04    0.34
 -11  11  -4    0.37    0.28
  11  11  -4    0.36    0.35
 -11 -11   4    0.87    0.43
 -11  11   4    1.04    0.39
 -12 -11  -4    2.64    0.49
  12  11  -4    2.82    0.44
 -11  12  -4    2.80    0.38
  11 -12  -4    3.56    0.48
 -11  12   4    2.60    0.45
 -12 -11   4    3.80    0.53
 -10  12  -4   12.73    0.70
 -12 -10  -4   12.92    0.84
  12  10  -4   12.83    0.80
  10 -12  -4   13.07    0.78
 -12 -10   4   13.39    0.86
 -10  12   4   12.75    0.78
  12   9  -4    6.06    0.53
   9 -12  -4    4.48    0.45
  -9  12  -4    4.04    0.39
 -12  -9  -4    4.51    0.47
 -12  -9   4    5.98    0.56
  -9  12   4    4.64    0.44
  -8  12  -4   -0.24    0.25
   8 -12  -4   -0.07    0.31
  12   8  -4   -0.03    0.31
 -12  -8  -4   -0.07    0.32
 -12  -8   4    0.55    0.34
  -8  12   4   -0.03    0.31
  12   7  -4    2.90    0.41
 -12  -7  -4    2.41    0.37
  -7  12  -4    2.68    0.33
   7 -12  -4    2.18    0.37
  -7  12   4    2.10    0.36
 -12  -7   4    2.58    0.40
  12   6  -4    0.10    0.29
  -6  12  -4    0.08    0.26
   6 -12  -4    0.06    0.29
 -12  -6  -4    0.26    0.29
  -6  12   4    0.11    0.29
 -12  -6   4    0.18    0.31
 -12  -5  -4   47.30    1.44
  12   5  -4   45.11    1.46
  -5  12  -4   46.29    1.39
   5 -12  -4   46.24    1.45
 -12  -5   4   45.85    1.48
  -5  12   4   47.46    1.44
  12   5   4   47.41    1.34
   4 -12  -4    3.86    0.38
  -4  12  -4    3.63    0.34
  12   4  -4    4.36    0.41
 -12  -4  -4    4.46    0.38
  -4  12   4    4.23    0.39
 -12  -4   4    3.38    0.38
   4 -12   4    4.15    0.33
  12   4   4    4.70    0.35
  -3  12  -4   15.88    0.69
  12   3  -4   16.76    0.76
   3 -12  -4   16.54    0.74
 -12  -3  -4   17.47    0.71
   3 -12   4   16.80    0.61
 -12  -3   4   17.23    0.76
  -3  12   4   17.11    0.73
  12   3   4   17.05    0.60
   2 -12  -4    8.37    0.56
  12   2  -4    8.43    0.57
 -12  -2  -4    8.05    0.51
  -2  12  -4    8.37    0.52
   2 -12   4    8.60    0.43
 -12  -2   4    8.81    0.56
  12   2   4    8.02    0.39
  -2  12   4    8.28    0.54
  12   1  -4   25.25    0.90
   1 -12  -4   22.35    0.89
 -12  -1  -4   24.51    0.85
  -1  12  -4   24.31    0.88
 -12  -1   4   25.29    0.91
  -1  12   4   24.55    0.89
  12   1   4   24.47    0.76
   1 -12   4   25.00    0.81
   0 -12  -4   88.25    2.42
  12   0  -4   85.69    2.40
 -12   0  -4   84.70    2.34
   0  12  -4   85.52    2.38
   0 -12   4   86.50    2.34
 -12   0   4   92.55    2.42
   0  12   4   87.59    2.39
  12   0   4   86.51    2.28
   1  12  -4   82.42    2.33
  12  -1  -4   85.41    2.35
  -1 -12  -4   86.12    2.37
 -12   1  -4   85.99    2.29
 -12   1   4   83.93    2.35
  12  -1   4   84.87    2.22
   1  12   4   85.06    2.32
  -1 -12   4   84.74    2.30
 -12   2  -4   75.19    2.07
   2  12  -4   76.41    2.14
  12  -2  -4   75.51    2.14
  -2 -12  -4   76.81    2.17
  -2 -12   4   78.94    2.12
 -12   2   4   75.26    2.15
  12  -2   4   78.03    2.03
   2  12   4   75.37    2.12
 -12   3  -4    2.57    0.27
   3  12  -4    2.67    0.34
  12  -3  -4    3.73    0.38
  -3 -12  -4    2.86    0.38
  -3 -12   4    3.71    0.35
 -12   3   4    2.85    0.34
   3  12   4    3.29    0.33
 -12   4  -4    0.02    0.21
  12  -4  -4    0.24    0.28
   4  12  -4   -0.13    0.26
  -4 -12  -4   -0.10    0.31
 -12   4   4    0.18    0.30
  -4 -12   4    0.10    0.27
   4  12   4    0.05    0.23
  12  -5  -4   36.72    1.23
 -12   5  -4   37.49    1.14
   5  12  -4   36.90    1.23
  -5 -12  -4   37.07    1.27
  -5 -12   4   37.52    1.25
 -12   5   4   38.03    1.24
   5  12   4   38.35    1.19
   6  12  -4    5.72    0.47
 -12   6  -4    5.64    0.45
  -6 -12  -4    5.78    0.51
  12  -6  -4    6.92    0.50
 -12   6   4    5.36    0.44
  -6 -12   4    6.43    0.50
   6  12   4    6.32    0.48
  -7 -12  -4    6.03    0.50
   7  12  -4    7.23    0.60
 -12   7  -4    6.03    0.49
  12  -7  -4    5.42    0.46
  -7 -12   4    6.64    0.54
   7  12   4    6.33    0.50
 -12   7   4    5.43    0.47
   8  12  -4   18.58    0.90
 -12   8  -4   20.83    0.80
  -8 -12  -4   21.55    0.93
  12  -8  -4   19.98    0.87
  -8 -12   4   20.00    0.95
 -12   8   4   20.87    0.91
   8  12   4   21.09    0.82
   9  12  -4   27.05    1.08
  -9 -12  -4   26.92    1.10
  12  -9  -4   27.48    1.05
 -12   9  -4   27.12    0.97
   9  12   4   28.40    1.00
 -12   9   4   27.97    1.08
  -9 -12   4   28.26    1.14
  10  12  -4    2.40    0.40
 -12  10  -4    2.10    0.34
 -10 -12  -4    2.24    0.45
  12 -10  -4    2.73    0.44
 -10 -12   4    2.29    0.45
 -12  10   4    1.56    0.39
 -12  11  -4   -0.04    0.29
  11  12  -4    0.32    0.36
 -11 -12  -4    0.06    0.40
  12 -11  -4    0.54    0.37
 -11 -12   4    0.54    0.41
 -12  11   4    0.03    0.39
 -12  12  -4   19.33    0.86
  12  12  -4   19.05    0.98
  12 -12  -4   17.57    0.93
 -12 -12  -4   18.29    1.04
 -12  12   4   18.46    1.00
 -12 -12   4   20.34    1.04
 -12  13  -4    3.61    0.45
 -13 -12  -4    4.30    0.57
  13  12  -4    3.88    0.53
  12 -13  -4    3.67    0.51
 -13 -12   4    4.20    0.59
 -12  13   4    4.07    0.57
  13  11  -4   10.22    0.82
 -11  13  -4    9.77    0.70
 -13 -11  -4    9.12    0.69
  11 -13  -4   10.17    0.79
 -13 -11   4   10.85    0.85
 -11  13   4    9.77    0.78
 -10  13  -4   24.27    0.97
 -13 -10  -4   24.68    1.11
  13  10  -4   23.78    1.07
  10 -13  -4   25.32    1.06
 -13 -10   4   26.72    1.15
 -10  13   4   24.44    1.06
  -9  13  -4    0.32    0.31
  13   9  -4    0.46    0.36
   9 -13  -4    0.14    0.34
 -13  -9  -4    0.91    0.39
 -13  -9   4    0.84    0.41
  -9  13   4    0.22    0.36
   8 -13  -4    2.59    0.43
  13   8  -4    1.94    0.40
  -8  13  -4    2.05    0.35
 -13  -8  -4    1.77    0.40
  -8  13   4    1.29    0.36
 -13  -8   4    1.90    0.41
  13   7  -4   28.16    1.07
  -7  13  -4   26.85    0.99
 -13  -7  -4   27.42    1.06
   7 -13  -4   27.53    1.05
  -7  13   4   26.40    1.03
 -13  -7   4   25.27    1.08
 -13  -6  -4   27.68    1.04
  -6  13  -4   27.50    0.98
  13   6  -4   26.10    1.05
   6 -13  -4   27.50    1.04
  -6  13   4   26.22    1.02
 -13  -6   4   27.20    1.07
   5 -13  -4   13.92    0.73
  -5  13  -4   13.64    0.67
  13   5  -4   13.70    0.74
 -13  -5  -4   13.01    0.71
  -5  13   4   14.45    0.72
 -13  -5   4   13.56    0.75
  13   4  -4    9.90    0.65
 -13  -4  -4    8.71    0.60
  -4  13  -4    9.52    0.59
   4 -13  -4    9.33    0.64
 -13  -4   4    9.22    0.67
  -4  13   4    9.39    0.63
  -3  13  -4   12.10    0.65
  13   3  -4   11.81    0.68
   3 -13  -4   11.91    0.67
 -13  -3  -4   11.43    0.64
 -13  -3   4   12.50    0.70
  -3  13   4   12.61    0.67
  13   2  -4    4.18    0.42
  -2  13  -4    3.98    0.38
 -13  -2  -4    3.94    0.37
   2 -13  -4    3.32    0.39
 -13  -2   4    2.86    0.38
   2 -13   4    3.54    0.30
  -2  13   4    4.14    0.39
  13   1  -4   85.83    2.40
  -1  13  -4   86.62    2.38
   1 -13  -4   86.19    2.41
 -13  -1  -4   85.76    2.35
 -13  -1   4   84.58    2.41
   1 -13   4   86.54    2.32
  -1  13   4   84.83    2.38
  13   0  -4  163.19    4.21
   0  13  -4  159.84    4.19
 -13   0  -4  159.86    4.15
   0 -13  -4  157.53    4.22
 -13   0   4  157.24    4.22
   0  13   4  159.87    4.19
   0 -13   4  160.55    4.15
 -13   1  -4  197.76    5.10
  13  -1  -4  198.04    5.17
  -1 -13  -4  194.19    5.18
   1  13  -4  197.59    5.16
 -13   1   4  199.00    5.17
  -1 -13   4  194.86    5.12
   1  13   4  209.49    5.16
  13  -2  -4   90.27    2.58
 -13   2  -4   92.84    2.52
  -2 -13  -4   92.33    2.61
   2  13  -4   91.64    2.59
 -13   2   4   95.55    2.60
  -2 -13   4   94.86    2.56
   2  13   4   97.11    2.58
  13  -3  -4   28.03    1.03
   3  13  -4   29.58    1.04
  -3 -13  -4   28.38    1.07
 -13   3  -4   27.76    0.94
 -13   3   4   27.32    1.03
   3  13   4   27.97    0.99
  -3 -13   4   28.10    1.01
  -4 -13  -4    3.70    0.46
  13  -4  -4    4.07    0.44
   4  13  -4    4.27    0.44
 -13   4  -4    3.39    0.33
   4  13   4    3.56    0.37
  -4 -13   4    4.20    0.43
 -13   4   4    2.91    0.37
  -5 -13  -4    8.96    0.69
 -13   5  -4    7.87    0.52
  13  -5  -4    8.29    0.62
   5  13  -4    7.98    0.63
  -5 -13   4    7.48    0.61
   5  13   4    8.93    0.56
 -13   5   4    8.60    0.63
 -13   6  -4   28.78    0.98
  -6 -13  -4   28.29    1.12
   6  13  -4   27.65    1.07
  13  -6  -4   29.21    1.07
   6  13   4   28.71    1.01
 -13   6   4   28.61    1.07
  -6 -13   4   29.33    1.09
 -13   7  -4    1.04    0.28
  13  -7  -4    1.09    0.36
   7  13  -4    1.62    0.38
  -7 -13  -4    1.16    0.41
 -13   7   4    0.88    0.37
  -7 -13   4    0.96    0.36
   7  13   4    1.88    0.32
  13  -8  -4    3.18    0.41
  -8 -13  -4    3.24    0.46
 -13   8  -4    4.28    0.39
   8  13  -4    2.38    0.41
   8  13   4    3.62    0.39
  -8 -13   4    3.54    0.47
 -13   8   4    4.78    0.50
  13  -9  -4   10.14    0.71
  -9 -13  -4    9.79    0.79
 -13   9  -4    9.98    0.63
   9  13  -4    8.75    0.74
 -13   9   4    8.36    0.71
  -9 -13   4    9.57    0.80
  13 -10  -4   -0.10    0.37
 -10 -13  -4    0.76    0.42
  10  13  -4    0.08    0.37
 -13  10  -4    0.21    0.30
 -13  10   4   -0.52    0.37
 -10 -13   4    0.24    0.42
  11  13  -4   -0.01    0.39
 -11 -13  -4    0.21    0.45
 -13  11  -4   -0.19    0.33
  13 -11  -4   -0.49    0.36
 -11 -13   4    0.60    0.46
 -13  11   4    0.09    0.40
  12  13  -4    0.32    0.42
  13 -12  -4    0.10    0.43
 -13  12  -4    0.07    0.34
 -12 -13  -4    0.15    0.45
 -13  12   4    0.11    0.43
 -12 -13   4    0.33    0.47
 -13 -13  -4    0.53    0.50
 -13  13  -4    0.14    0.37
  13 -13  -4    0.42    0.45
  13  13  -4    0.17    0.44
 -13  13   4    0.21    0.47
 -13 -13   4    0.26    0.48
  14  13  -4   19.17    1.09
  13 -14  -4   18.61    1.06
 -13  14  -4   18.33    0.97
 -14 -13  -4   18.04    1.17
 -14 -13   4   21.40    1.19
 -13  14   4   18.82    1.14
  12 -14  -4    5.59    0.60
 -14 -12  -4    4.74    0.62
  14  12  -4    5.06    0.59
 -12  14  -4    5.19    0.51
 -12  14   4    5.22    0.61
 -14 -12   4    6.04    0.67
  14  11  -4    1.09    0.45
  11 -14  -4    0.43    0.42
 -11  14  -4    0.27    0.35
 -14 -11  -4    0.15    0.48
 -11  14   4    0.19    0.43
 -14 -11   4    0.66    0.48
 -14 -10  -4    7.04    0.64
  10 -14  -4    7.56    0.63
  14  10  -4    6.94    0.59
 -10  14  -4    6.70    0.53
 -10  14   4    8.08    0.64
 -14 -10   4    8.93    0.71
 -14  -9  -4    4.37    0.52
  14   9  -4    5.11    0.55
   9 -14  -4    5.47    0.55
  -9  14  -4    5.31    0.48
 -14  -9   4    4.98    0.55
  -9  14   4    5.29    0.55
   8 -14  -4   14.38    0.84
  14   8  -4   14.43    0.87
  -8  14  -4   14.34    0.76
 -14  -8  -4   14.28    0.85
  -8  14   4   12.93    0.81
 -14  -8   4   15.44    0.91
   7 -14  -4   18.21    0.90
  14   7  -4   19.75    0.93
  -7  14  -4   18.64    0.86
 -14  -7  -4   19.98    0.93
 -14  -7   4   18.79    0.96
  -7  14   4   18.76    0.92
  -6  14  -4   46.81    1.46
  14   6  -4   46.59    1.53
   6 -14  -4   46.10    1.52
 -14  -6  -4   43.87    1.50
  -6  14   4   45.52    1.49
 -14  -6   4   47.56    1.55
  14   5  -4   13.00    0.76
   5 -14  -4   13.21    0.76
  -5  14  -4   12.51    0.70
 -14  -5  -4   13.04    0.73
  -5  14   4   11.94    0.73
 -14  -5   4   12.61    0.78
   4 -14  -4    5.41    0.50
  14   4  -4    5.23    0.48
 -14  -4  -4    4.73    0.44
  -4  14  -4    5.79    0.46
 -14  -4   4    6.59    0.54
  -4  14   4    5.84    0.50
 -14  -3  -4    0.39    0.29
  14   3  -4    0.44    0.33
   3 -14  -4    0.20    0.32
  -3  14  -4    0.27    0.30
  -3  14   4    0.29    0.31
 -14  -3   4    0.34    0.33
   2 -14  -4   -0.19    0.30
  -2  14  -4    0.11    0.29
 -14  -2  -4   -0.10    0.26
  14   2  -4    0.26    0.31
  -2  14   4    0.22    0.31
 -14  -2   4    0.18    0.31
  -1  14  -4   21.93    0.91
 -14  -1  -4   22.29    0.87
   1 -14  -4   21.67    0.94
  14   1  -4   23.83    0.94
  -1  14   4   21.84    0.89
 -14  -1   4   23.85    0.94
  14   0  -4   47.30    1.49
 -14   0  -4   46.04    1.43
   0 -14  -4   46.88    1.51
   0  14  -4   47.00    1.48
 -14   0   4   46.45    1.50
   0  14   4   47.77    1.48
   0 -14   4   47.60    1.42
   1  14  -4  180.32    4.67
 -14   1  -4  175.38    4.61
  -1 -14  -4  179.62    4.70
  14  -1  -4  174.42    4.66
   1  14   4  179.38    4.65
  -1 -14   4  174.38    4.62
 -14   1   4  179.53    4.68
  -2 -14  -4   53.58    1.70
 -14   2  -4   52.02    1.58
  14  -2  -4   54.52    1.66
   2  14  -4   53.42    1.66
   2  14   4   56.27    1.64
  -2 -14   4   54.81    1.62
 -14   2   4   53.98    1.68
   3  14  -4   14.74    0.77
  14  -3  -4   15.04    0.76
  -3 -14  -4   15.25    0.85
 -14   3  -4   15.80    0.70
  -3 -14   4   15.96    0.75
   3  14   4   14.84    0.74
 -14   3   4   14.45    0.79
  -4 -14  -4    8.75    0.63
  14  -4  -4    9.25    0.66
   4  14  -4    8.42    0.67
 -14   4  -4    9.46    0.57
   4  14   4    8.88    0.61
 -14   4   4    8.49    0.66
  -4 -14   4    9.78    0.65
  -5 -14  -4    9.65    0.79
 -14   5  -4   10.48    0.61
  14  -5  -4    9.21    0.68
   5  14  -4   10.51    0.70
 -14   5   4   10.51    0.72
   5  14   4   10.33    0.63
  -5 -14   4   10.66    0.71
   6  14  -4   52.34    1.71
 -14   6  -4   55.59    1.61
  -6 -14  -4   53.42    1.76
  14  -6  -4   54.24    1.69
   6  14   4   55.35    1.65
 -14   6   4   53.86    1.71
  -6 -14   4   54.13    1.72
  14  -7  -4    0.89    0.36
 -14   7  -4    1.07    0.31
  -7 -14  -4    1.88    0.46
   7  14  -4    1.55    0.39
  -7 -14   4    1.49    0.39
 -14   7   4    1.14    0.39
   7  14   4    1.06    0.32
 -14   8  -4    0.20    0.29
   8  14  -4    0.81    0.38
  14  -8  -4    0.16    0.37
  -8 -14  -4    0.39    0.44
  -8 -14   4    0.22    0.39
 -14   8   4    0.17    0.37
   8  14   4    0.09    0.30
   9  14  -4    0.33    0.38
  14  -9  -4   -0.66    0.36
  -9 -14  -4   -0.10    0.41
  -9 -14   4    0.36    0.42
 -14   9   4    0.48    0.41
  10  14  -4    0.68    0.42
 -10 -14  -4    0.55    0.47
  14 -10  -4    0.08    0.37
 -14  10  -4    0.72    0.35
 -10 -14   4    0.79    0.47
 -14  10   4    0.43    0.41
 -11 -14  -4    8.92    0.71
 -14  11  -4    9.34    0.72
  14 -11  -4    9.79    0.81
  11  14  -4    9.12    0.70
 -11 -14   4   11.92    0.94
 -14  11   4    9.48    0.71
  14 -12  -4    0.00    0.42
  12  14  -4    0.29    0.44
 -12 -14  -4   -0.14    0.48
 -14  12  -4    0.09    0.37
 -12 -14   4    0.99    0.52
 -14  12   4    0.06    0.46
  14 -13  -4    5.10    0.59
 -14  13  -4    4.29    0.52
 -13 -14  -4    4.19    0.62
  13  14  -4    5.82    0.64
 -14  13   4    5.32    0.65
 -14  14  -4    0.29    0.44
  14  14  -4    0.35    0.51
 -14 -14  -4    0.93    0.58
 -14  14   4   -0.17    0.54
 -15 -13  -4    6.52    0.72
  15  13  -4    5.72    0.64
 -13  15  -4    5.45    0.57
 -13  15   4    6.29    0.69
  12 -15  -4   17.74    1.05
 -12  15  -4   17.27    0.97
  15  12  -4   17.74    1.10
 -15 -12  -4   17.83    1.15
 -12  15   4   17.43    1.11
 -15 -12   4   18.96    1.16
  15  11  -4    0.36    0.46
 -11  15  -4   -0.18    0.37
 -15 -11  -4   -0.13    0.50
  11 -15  -4    0.38    0.46
 -11  15   4   -0.32    0.43
 -15 -11   4    0.68    0.49
  10 -15  -4    0.05    0.45
 -10  15  -4    0.95    0.39
  15  10  -4    0.86    0.44
 -15 -10  -4    0.45    0.48
 -15 -10   4    0.96    0.49
 -10  15   4    0.99    0.42
  -9  15  -4   14.69    0.84
 -15  -9  -4   14.69    0.94
   9 -15  -4   17.05    0.92
  15   9  -4   15.62    0.94
  -9  15   4   14.84    0.93
 -15  -9   4   14.93    0.96
  -8  15  -4   23.53    1.00
   8 -15  -4   23.41    1.07
  15   8  -4   23.56    1.10
 -15  -8  -4   23.52    1.08
  -8  15   4   22.78    1.06
 -15  -8   4   22.67    1.14
  -7  15  -4  118.10    3.21
   7 -15  -4  118.93    3.26
  15   7  -4  116.04    3.28
 -15  -7  -4  113.22    3.25
 -15  -7   4  115.84    3.30
  -7  15   4  118.80    3.26
 -15  -6  -4   37.55    1.32
  15   6  -4   34.14    1.30
   6 -15  -4   36.18    1.33
  -6  15  -4   34.78    1.26
 -15  -6   4   35.93    1.35
  -6  15   4   36.86    1.30
   5 -15  -4   63.34    1.92
  -5  15  -4   61.49    1.86
 -15  -5  -4   62.78    1.90
  15   5  -4   60.13    1.91
 -15  -5   4   58.78    1.92
  -5  15   4   65.43    1.91
 -15  -4  -4    0.24    0.33
  15   4  -4    0.46    0.36
   4 -15  -4    0.46    0.34
  -4  15  -4    0.45    0.33
  -4  15   4    0.54    0.37
 -15  -4   4    0.03    0.37
 -15  -3  -4    0.35    0.31
   3 -15  -4   -0.23    0.34
  -3  15  -4   -0.14    0.31
  15   3  -4   -0.19    0.34
  -3  15   4   -0.23    0.32
 -15  -3   4    0.13    0.35
  -2  15  -4   12.50    0.76
 -15  -2  -4   12.99    0.71
  15   2  -4   12.52    0.78
   2 -15  -4   14.16    0.79
 -15  -2   4   14.13    0.81
  -2  15   4   12.99    0.76
 -15  -1  -4    0.44    0.29
  15   1  -4    0.85    0.35
   1 -15  -4    0.50    0.37
  -1  15  -4    0.40    0.32
 -15  -1   4    0.48    0.36
  -1  15   4    0.74    0.33
 -15   0  -4   23.58    0.91
   0 -15  -4   23.91    1.01
  15   0  -4   22.08    0.97
   0  15  -4   23.40    0.96
   0  15   4   23.38    0.96
 -15   0   4   22.58    0.99
  15  -1  -4   35.70    1.26
 -15   1  -4   34.60    1.19
   1  15  -4   37.49    1.27
  -1 -15  -4   35.88    1.31
   1  15   4   35.05    1.24
 -15   1   4   38.29    1.30
 -15   2  -4   30.09    1.07
  -2 -15  -4   31.60    1.19
   2  15  -4   29.58    1.16
  15  -2  -4   30.92    1.14
   2  15   4   31.75    1.13
 -15   2   4   31.55    1.17
  15  -3  -4   13.40    0.77
   3  15  -4   14.35    0.80
  -3 -15  -4   13.08    0.84
 -15   3  -4   12.05    0.69
 -15   3   4   13.08    0.80
   3  15   4   13.77    0.74
  15  -4  -4    0.36    0.37
   4  15  -4    1.00    0.38
  -4 -15  -4    0.71    0.41
 -15   4  -4    1.00    0.31
   4  15   4    0.63    0.32
 -15   4   4    0.92    0.40
  15  -5  -4    5.38    0.50
   5  15  -4    6.07    0.54
 -15   5  -4    6.52    0.48
  -5 -15  -4    5.42    0.57
  -5 -15   4    5.42    0.57
   5  15   4    5.54    0.47
 -15   5   4    6.81    0.58
   6  15  -4    5.47    0.54
  15  -6  -4    6.56    0.55
 -15   6  -4    4.84    0.44
  -6 -15  -4    6.72    0.62
   6  15   4    5.95    0.50
 -15   6   4    5.39    0.53
  -6 -15   4    7.15    0.65
 -15   7  -4    1.55    0.35
  15  -7  -4    1.31    0.40
  -7 -15  -4    2.37    0.52
   7  15  -4    2.20    0.46
 -15   7   4    1.44    0.43
  -7 -15   4    1.41    0.46
   7  15   4    1.51    0.38
  15  -8  -4   16.32    0.89
 -15   8  -4   17.10    0.82
  -8 -15  -4   16.65    1.00
   8  15  -4   16.31    0.96
 -15   8   4   17.26    0.95
  15  -9  -4    9.44    0.79
  -9 -15  -4    9.23    0.73
 -15   9  -4   10.75    0.72
   9  15  -4    8.04    0.66
 -15   9   4   10.47    0.83
  15 -10  -4    1.04    0.44
 -10 -15  -4    1.40    0.50
 -15  10  -4    1.06    0.38
  10  15  -4    0.94    0.46
 -15  10   4    0.74    0.47
 -15  11  -4   20.17    0.97
  15 -11  -4   20.04    1.06
  11  15  -4   21.75    1.11
 -11 -15  -4   20.65    1.16
 -15  11   4   20.51    1.11
  12  15  -4    1.95    0.53
 -12 -15  -4    1.58    0.57
 -15  12  -4    1.34    0.44
 -15  12   4    1.29    0.52
 -13 -15  -4   12.73    1.08
 -15  13  -4   12.03    0.88
  13  15  -4   12.24    1.01
 -15  13   4   11.91    0.86
 -16 -12  -4    7.56    0.75
 -12  16  -4    6.38    0.62
  16  12  -4    7.37    0.71
 -16 -12   4    8.49    0.79
 -11  16  -4    5.17    0.55
 -16 -11  -4    5.06    0.66
  16  11  -4    4.82    0.61
  11 -16  -4    5.14    0.63
 -11  16   4    5.70    0.64
 -16 -11   4    4.35    0.65
  10 -16  -4   -0.58    0.45
 -10  16  -4    0.09    0.39
 -16 -10  -4   -0.13    0.49
  16  10  -4   -0.08    0.44
 -10  16   4    0.20    0.45
 -16 -10   4    0.25    0.50
  16   9  -4   14.83    0.98
   9 -16  -4   16.33    0.98
 -16  -9  -4   15.78    1.02
  -9  16  -4   14.89    0.89
 -16  -9   4   17.31    1.03
  -9  16   4   14.50    0.97
  -8  16  -4   30.76    1.18
 -16  -8  -4   28.75    1.26
   8 -16  -4   29.00    1.26
  16   8  -4   29.67    1.28
 -16  -8   4   32.26    1.32
  -8  16   4   28.69    1.24
   7 -16  -4   80.15    2.45
 -16  -7  -4   80.41    2.44
  -7  16  -4   83.39    2.40
  16   7  -4   80.99    2.46
  -7  16   4   80.82    2.45
 -16  -7   4   86.33    2.51
  16   6  -4   71.41    2.18
 -16  -6  -4   72.20    2.17
  -6  16  -4   70.58    2.13
   6 -16  -4   69.16    2.18
  -6  16   4   70.22    2.16
 -16  -6   4   73.07    2.23
  -5  16  -4   13.68    0.84
  16   5  -4   13.37    0.88
   5 -16  -4   14.73    0.89
 -16  -5  -4   14.05    0.86
 -16  -5   4   13.19    0.90
  -5  16   4   13.86    0.86
  16   4  -4    1.80    0.45
  -4  16  -4    1.30    0.39
   4 -16  -4    1.91    0.44
 -16  -4  -4    1.43    0.40
 -16  -4   4    1.89    0.45
  -4  16   4    1.88    0.44
   3 -16  -4   19.80    0.97
 -16  -3  -4   21.30    0.95
  16   3  -4   19.86    0.98
  -3  16  -4   22.48    0.97
  -3  16   4   20.62    0.97
 -16  -3   4   19.44    1.00
   2 -16  -4   22.84    1.02
  -2  16  -4   22.87    1.00
  16   2  -4   22.12    1.02
 -16  -2  -4   20.64    0.94
 -16  -2   4   21.35    1.01
  -2  16   4   21.09    0.97
 -16  -1  -4    4.50    0.45
  -1  16  -4    4.01    0.47
  16   1  -4    5.37    0.53
   1 -16  -4    4.60    0.54
  -1  16   4    4.08    0.47
 -16  -1   4    4.85    0.55
   0 -16  -4    5.43    0.58
  16   0  -4    5.10    0.51
   0  16  -4    4.68    0.49
 -16   0  -4    4.27    0.44
 -16   0   4    6.11    0.57
   0  16   4    5.72    0.52
   1  16  -4    2.26    0.43
 -16   1  -4    1.92    0.36
  -1 -16  -4    2.33    0.46
  16  -1  -4    2.21    0.42
   1  16   4    2.75    0.43
 -16   1   4    2.13    0.46
   2  16  -4    1.93    0.42
 -16   2  -4    1.14    0.34
  16  -2  -4    1.57    0.41
  -2 -16  -4    1.42    0.45
 -16   2   4    1.28    0.41
   2  16   4    1.35    0.36
  16  -3  -4    0.24    0.36
   3  16  -4   -0.24    0.37
  -3 -16  -4    0.31    0.41
 -16   3  -4    0.31    0.31
   3  16   4    0.54    0.35
 -16   3   4   -0.02    0.39
  -4 -16  -4    0.58    0.43
  16  -4  -4    0.29    0.38
 -16   4  -4    0.18    0.32
   4  16  -4    0.28    0.39
   4  16   4    0.15    0.34
 -16   4   4    0.59    0.41
  16  -5  -4   22.99    1.04
   5  16  -4   23.28    1.05
  -5 -16  -4   22.64    1.11
 -16   5  -4   23.72    0.95
 -16   5   4   22.25    1.06
   5  16   4   21.21    0.97
   6  16  -4    0.29    0.40
 -16   6  -4   -0.08    0.32
  -6 -16  -4    0.25    0.45
  16  -6  -4    0.02    0.39
 -16   6   4    0.37    0.43
   6  16   4    0.26    0.35
  16  -7  -4   28.34    1.19
   7  16  -4   29.18    1.22
  -7 -16  -4   29.03    1.31
 -16   7  -4   27.92    1.09
 -16   7   4   28.83    1.22
  -8 -16  -4    2.65    0.59
 -16   8  -4    2.90    0.43
   8  16  -4    2.80    0.50
  16  -8  -4    3.00    0.51
 -16   8   4    2.78    0.50
   9  16  -4    7.81    0.68
 -16   9  -4    8.99    0.74
  16  -9  -4    8.05    0.66
  -9 -16  -4    8.43    0.73
 -16   9   4    8.44    0.69
 -10 -16  -4   20.38    1.19
  16 -10  -4   19.99    1.06
 -16  10  -4   19.75    1.00
  10  16  -4   22.56    1.14
 -16  10   4   23.24    1.17
 -11 -16  -4    7.44    0.75
  11  16  -4    8.73    0.76
 -16  11  -4    6.82    0.59
 -16  11   4    7.51    0.74
  12  16  -4   30.69    1.40
 -16  12  -4   28.35    1.24
 -12 -16  -4   32.40    1.48
 -16  12   4   30.10    1.39
  17  10  -4    0.55    0.49
  10 -17  -4    0.20    0.49
 -10  17  -4    0.74    0.44
 -17 -10  -4    0.21    0.53
 -10  17   4    0.19    0.46
 -17 -10   4    1.00    0.53
  17   9  -4    6.94    0.67
  -9  17  -4    6.31    0.60
 -17  -9  -4    7.10    0.69
   9 -17  -4    7.06    0.68
 -17  -9   4    8.26    0.76
  -9  17   4    5.51    0.62
 -17  -8  -4   48.19    1.72
  17   8  -4   48.66    1.74
  -8  17  -4   46.50    1.64
   8 -17  -4   50.09    1.74
  -8  17   4   49.35    1.71
 -17  -8   4   48.55    1.76
   7 -17  -4   42.34    1.55
  17   7  -4   39.77    1.53
 -17  -7  -4   38.73    1.51
  -7  17  -4   41.27    1.47
  -7  17   4   39.95    1.50
 -17  -7   4   42.56    1.60
   6 -17  -4   54.76    1.84
 -17  -6  -4   53.88    1.82
  17   6  -4   55.72    1.84
  -6  17  -4   56.02    1.79
 -17  -6   4   53.64    1.88
  -6  17   4   56.08    1.83
 -17  -5  -4   25.36    1.16
   5 -17  -4   27.77    1.21
  -5  17  -4   26.23    1.15
  17   5  -4   28.11    1.21
 -17  -5   4   29.18    1.24
  -5  17   4   28.39    1.19
  17   4  -4    0.03    0.41
  -4  17  -4   -0.67    0.36
 -17  -4  -4   -0.40    0.37
   4 -17  -4   -0.81    0.40
  -4  17   4   -0.60    0.40
 -17  -4   4   -0.36    0.43
 -17  -3  -4    1.88    0.42
   3 -17  -4    1.10    0.42
  -3  17  -4    1.98    0.45
  17   3  -4    1.60    0.47
 -17  -3   4    2.57    0.52
  -3  17   4    1.28    0.43
 -17  -2  -4    1.72    0.40
  -2  17  -4    1.33    0.44
   2 -17  -4    1.44    0.43
  17   2  -4    1.69    0.45
 -17  -2   4    1.98    0.48
  -2  17   4    1.77    0.45
 -17  -1  -4    9.94    0.74
   1 -17  -4    8.88    0.70
  17   1  -4    9.17    0.66
  -1  17  -4   10.51    0.80
 -17  -1   4    8.01    0.66
  -1  17   4    9.65    0.79
   0 -17  -4    0.07    0.41
 -17   0  -4   -0.02    0.35
   0  17  -4   -0.01    0.39
  17   0  -4   -0.04    0.39
   0  17   4    0.03    0.39
 -17   0   4   -0.10    0.41
   1  17  -4    0.38    0.41
 -17   1  -4    0.59    0.35
  -1 -17  -4    0.22    0.44
  17  -1  -4   -0.11    0.38
   1  17   4    0.63    0.41
 -17   1   4   -0.19    0.41
  17  -2  -4    4.11    0.50
   2  17  -4    4.01    0.51
  -2 -17  -4    4.42    0.58
 -17   2  -4    3.79    0.45
   2  17   4    4.40    0.51
 -17   2   4    4.64    0.57
  -3 -17  -4    6.98    0.67
  17  -3  -4    8.20    0.64
   3  17  -4    8.06    0.66
 -17   3  -4    6.59    0.52
 -17   3   4    8.26    0.68
   3  17   4    7.98    0.62
  17  -4  -4    0.24    0.41
   4  17  -4    0.15    0.43
  -4 -17  -4    0.09    0.48
 -17   4  -4    0.05    0.34
 -17   4   4    0.15    0.44
   4  17   4    0.51    0.36
  17  -5  -4    7.49    0.63
  -5 -17  -4    7.43    0.71
   5  17  -4    5.60    0.59
 -17   5  -4    6.26    0.52
   5  17   4    6.18    0.57
 -17   5   4    6.60    0.60
  -6 -17  -4   30.86    1.36
  17  -6  -4   30.69    1.27
 -17   6  -4   30.95    1.18
   6  17  -4   31.76    1.31
 -17   6   4   31.39    1.31
  17  -7  -4   12.34    0.89
  -7 -17  -4   11.85    1.01
   7  17  -4   13.47    0.96
 -17   7  -4   11.67    0.82
 -17   7   4   12.91    0.95
  -8 -17  -4   18.34    1.18
  17  -8  -4   17.48    1.00
   8  17  -4   18.91    1.07
 -17   8  -4   16.07    0.92
 -17   8   4   17.06    1.08
 -17   9  -4   26.52    1.15
   9  17  -4   26.40    1.29
  -9 -17  -4   27.29    1.40
 -17   9   4   27.34    1.28
  10  17  -4   17.16    1.09
 -10 -17  -4   16.89    1.16
 -17  10  -4   16.22    0.97
 -17  10   4   16.52    1.12
 -18  -8  -4    2.34    0.58
  18   8  -4    1.58    0.53
   8 -18  -4    1.19    0.52
  -8  18  -4    1.16    0.46
 -18  -8   4    1.73    0.55
  -8  18   4    1.49    0.51
  -7  18  -4   35.68    1.41
 -18  -7  -4   35.99    1.48
   7 -18  -4   37.56    1.47
  18   7  -4   35.64    1.47
  -7  18   4   37.11    1.46
 -18  -7   4   37.53    1.54
  -6  18  -4    7.78    0.66
   6 -18  -4    7.88    0.69
 -18  -6  -4    6.57    0.66
  18   6  -4    9.19    0.73
 -18  -6   4    8.02    0.72
  -6  18   4    7.51    0.66
  -5  18  -4    8.08    0.67
 -18  -5  -4    7.55    0.66
   5 -18  -4    8.99    0.74
  18   5  -4    9.10    0.71
  -5  18   4    9.07    0.73
 -18  -5   4    8.90    0.74
  -4  18  -4    0.36    0.44
   4 -18  -4    0.56    0.47
 -18  -4  -4    0.54    0.43
  18   4  -4    0.34    0.44
  -4  18   4   -0.43    0.43
 -18  -4   4    0.33    0.48
  18   3  -4    0.65    0.44
  -3  18  -4    0.73    0.45
   3 -18  -4    0.82    0.48
 -18  -3  -4    0.97    0.44
  -3  18   4    0.68    0.46
 -18  -3   4    1.16    0.48
  -2  18  -4    7.42    0.64
 -18  -2  -4    6.68    0.58
   2 -18  -4    6.12    0.62
  18   2  -4    7.18    0.64
  -2  18   4    8.85    0.70
 -18  -2   4    7.78    0.69
  -1  18  -4    6.46    0.63
  18   1  -4    6.64    0.62
   1 -18  -4    8.11    0.71
 -18  -1  -4    6.18    0.57
  -1  18   4    6.79    0.62
 -18  -1   4    6.37    0.63
  18   0  -4    7.01    0.63
   0 -18  -4    6.94    0.66
 -18   0  -4    5.86    0.55
   0  18  -4    6.12    0.60
 -18   0   4    5.05    0.58
   0  18   4    6.97    0.61
  18  -1  -4    1.34    0.46
  -1 -18  -4    1.82    0.52
   1  18  -4    0.78    0.45
 -18   1  -4    1.01    0.41
   1  18   4    1.01    0.45
 -18   1   4    0.81    0.46
  18  -2  -4    1.12    0.48
   2  18  -4    2.15    0.52
 -18   2  -4    2.10    0.43
  -2 -18  -4    1.82    0.54
 -18   2   4    1.75    0.51
   2  18   4    1.85    0.46
  18  -3  -4    0.44    0.43
 -18   3  -4    0.77    0.40
  -3 -18  -4    0.37    0.50
   3  18  -4    0.78    0.47
 -18   3   4    0.82    0.47
   3  18   4    0.38    0.38
  -4 -18  -4   10.68    0.83
   4  18  -4   10.98    0.92
  18  -4  -4   11.52    0.89
 -18   4  -4    9.89    0.79
 -18   4   4   12.08    0.94
 -18   5  -4   11.80    0.82
   5  18  -4   10.44    0.78
  -5 -18  -4   10.88    0.84
  18  -5  -4   11.44    0.89
 -18   5   4   11.02    0.80
  -6 -18  -4    9.25    0.81
  18  -6  -4    7.27    0.65
   6  18  -4    8.05    0.70
 -18   6  -4    8.22    0.61
 -18   6   4   10.00    0.78
  -7 -18  -4    4.29    0.67
 -18   7  -4    4.52    0.54
   7  18  -4    5.45    0.66
 -18   7   4    4.50    0.63
 -18   8  -4    1.40    0.48
  -8 -18  -4    2.15    0.64
   8  18  -4    1.94    0.56
 -18   8   4    1.37    0.58
 -19  -6  -4   -0.09    0.50
   6 -19  -4    0.45    0.52
  19   6  -4    0.49    0.52
  -6  19  -4    0.20    0.48
 -19  -6   4    0.37    0.52
  -6  19   4    0.01    0.48
  -5  19  -4    2.52    0.54
  19   5  -4    2.95    0.56
 -19  -5  -4    2.12    0.55
   5 -19  -4    3.00    0.61
  -5  19   4    2.30    0.54
 -19  -5   4    2.94    0.61
 -19  -4  -4    0.49    0.47
   4 -19  -4    0.63    0.52
  19   4  -4    2.27    0.51
  -4  19  -4    1.29    0.50
  -4  19   4    0.95    0.49
 -19  -4   4    1.64    0.53
  19   3  -4    0.98    0.46
   3 -19  -4    1.63    0.51
 -19  -3  -4    1.36    0.46
  -3  19  -4    1.45    0.50
 -19  -3   4    0.84    0.50
  -3  19   4    0.64    0.48
 -19  -2  -4   22.21    1.11
  19   2  -4   22.44    1.14
  -2  19  -4   24.32    1.19
   2 -19  -4   21.80    1.20
 -19  -2   4   23.95    1.21
  -2  19   4   24.95    1.19
   1 -19  -4    0.34    0.49
 -19  -1  -4    0.31    0.42
  -1  19  -4    0.12    0.47
  19   1  -4   -0.13    0.45
 -19  -1   4    0.95    0.50
  -1  19   4    0.67    0.47
  19   0  -4    5.07    0.60
   0  19  -4    6.58    0.65
 -19   0  -4    6.08    0.59
   0 -19  -4    6.20    0.68
 -19   0   4    7.26    0.69
   0  19   4    5.41    0.60
 -19   1  -4    4.66    0.53
  19  -1  -4    4.07    0.57
   1  19  -4    4.63    0.61
  -1 -19  -4    4.35    0.62
   1  19   4    5.81    0.62
 -19   1   4    4.78    0.62
 -19   2  -4    0.08    0.41
  -2 -19  -4    0.80    0.54
  19  -2  -4    0.56    0.47
   2  19  -4    0.58    0.48
 -19   2   4    0.11    0.50
   2  19   4    0.56    0.46
 -19   3  -4   38.95    1.42
  -3 -19  -4   38.04    1.59
   3  19  -4   37.96    1.55
 -19   3   4   38.76    1.53
  -4 -19  -4    9.36    0.80
 -19   4  -4   11.45    0.86
   4  19  -4   11.88    0.99
 -19   4   4   12.56    0.88
 -19   5  -4   33.05    1.32
   5  19  -4   35.94    1.48
  -5 -19  -4   31.86    1.55
 -19   5   4   33.65    1.46
   6  19  -4    6.90    0.73
 -19   6  -4    5.89    0.60
  -6 -19  -4    5.42    0.77
 -19   6   4    6.04    0.71
  -2  20  -4    7.06    0.69
   2 -20  -4    4.60    0.63
 -20  -2  -4    7.27    0.68
 -20  -2   4    6.37    0.70
  -2  20   4    5.61    0.67
 -20  -1  -4   21.76    1.14
  -1  20  -4   22.04    1.21
   1 -20  -4   19.34    1.23
  -1  20   4   24.29    1.19
 -20  -1   4   21.49    1.22
   0  20  -4    1.51    0.56
 -20   0  -4    0.63    0.48
   0 -20  -4    0.64    0.58
 -20   0   4    0.76    0.54
   0  20   4    0.80    0.52
   1  20  -4    9.61    0.80
  -1 -20  -4    7.86    0.74
 -20   1  -4    7.82    0.68
 -20   1   4    7.82    0.72
 -20   2  -4   20.76    1.10
  -2 -20  -4   19.40    1.22
   2  20  -4   22.72    1.25
 -20   2   4   20.98    1.21
   0   0  -5    4.18    0.17
   0   0  -5    4.39    0.18
   0   0   5    4.18    0.15
   0  -1  -5  302.43    7.85
   1   0  -5  309.67    7.95
  -1   0  -5  306.03    7.84
   1   0  -5  321.12    7.91
  -1   0  -5  318.21    7.84
   0   1  -5  318.10    7.88
   0   1  -5  311.07    7.86
   0  -1  -5  312.06    7.84
  -1   0   5  315.29    7.91
   0   1   5  323.02    7.85
  -1   1  -5    1.41    0.09
  -1  -1  -5    1.51    0.10
  -1  -1  -5    1.06    0.09
   1  -1  -5    1.16    0.11
   1  -1  -5    1.05    0.11
  -1   1  -5    1.30    0.09
   1   1  -5    1.28    0.11
   1   1  -5    1.01    0.10
  -1  -1   5    1.27    0.10
  -1   1   5    1.23    0.10
  -1   2  -5   36.02    0.92
   1  -2  -5   35.13    0.96
   2   1  -5   37.58    0.97
  -1   2  -5   35.51    0.92
  -2  -1  -5   36.20    0.93
   1  -2  -5   36.02    0.96
   2   1  -5   34.71    0.96
  -2  -1  -5   34.99    0.93
  -2  -1   5   35.57    0.96
  -1   2   5   36.76    0.95
   0   2  -5   11.65    0.35
   2   0  -5   13.20    0.40
  -2   0  -5   11.99    0.33
   0  -2  -5   11.73    0.38
   0  -2  -5   12.36    0.38
  -2   0  -5   11.86    0.33
   2   0  -5   11.98    0.39
   0   2  -5   12.17    0.36
  -2   0   5   12.11    0.38
   0   2   5   12.08    0.36
  -1  -2  -5   12.01    0.38
   1   2  -5   12.81    0.39
   2  -1  -5   12.31    0.40
  -1  -2  -5   12.03    0.38
   1   2  -5   12.25    0.38
  -1  -2   5   12.90    0.37
   1   2   5   12.47    0.36
  -2   1   5   12.36    0.39
   2   2  -5    0.89    0.12
   2   2  -5    0.98    0.12
   2  -2  -5    0.94    0.12
  -2  -2  -5    0.97    0.10
  -2  -2  -5    0.80    0.10
   2  -2  -5    0.91    0.12
  -2   2  -5    0.97    0.07
   2   2   5    1.02    0.07
  -2  -2   5    0.93    0.11
  -2   2   5    1.04    0.12
  -3  -2  -5   16.09    0.46
  -3  -2  -5   15.76    0.46
   2  -3  -5   16.52    0.50
  -2   3  -5   15.15    0.43
  -2   3  -5   15.68    0.43
   3   2  -5   15.92    0.50
   2  -3  -5   15.14    0.50
   3   2  -5   14.66    0.49
   3   2   5   16.01    0.41
  -2   3   5   15.43    0.49
  -3  -2   5   15.70    0.50
  -1   3  -5    0.50    0.08
  -3  -1  -5    0.32    0.07
  -1   3  -5    0.45    0.08
   1  -3  -5    0.35    0.11
  -3  -1  -5    0.42    0.08
   1  -3  -5    0.43    0.11
   3   1  -5    0.31    0.11
  -3  -1   5    0.24    0.10
  -1   3   5    0.19    0.09
  -3   0  -5    1.90    0.10
  -3   0  -5    1.81    0.10
   0  -3  -5    2.00    0.15
   3   0  -5    2.25    0.17
   0   3  -5    1.84    0.13
   0   3  -5    2.07    0.15
   3   0  -5    1.60    0.15
   0  -3  -5    1.79    0.14
  -3   0   5    1.81    0.15
   0   3   5    2.03    0.16
   0  -3   5    2.00    0.09
   1   3  -5  106.72    2.69
   3  -1  -5  109.47    2.71
  -1  -3  -5  102.32    2.68
   1   3  -5  102.91    2.68
  -1  -3  -5  108.08    2.69
   3  -1  -5  103.04    2.70
  -1  -3   5  108.49    2.67
  -3   1   5  105.90    2.70
   1   3   5  105.70    2.67
   3  -2  -5   11.27    0.41
  -2  -3  -5   11.26    0.38
   2   3  -5   11.66    0.40
  -2  -3  -5   11.59    0.38
   3  -2  -5   12.19    0.41
   2   3  -5   11.48    0.40
   2   3   5   11.77    0.35
  -2  -3   5   11.24    0.39
  -3   2   5   10.64    0.39
   3  -3  -5    1.27    0.16
  -3  -3  -5    1.51    0.13
   3   3  -5    1.36    0.15
  -3   3  -5    1.51    0.10
  -3   3  -5    1.42    0.10
  -3  -3  -5    1.22    0.13
   3  -3  -5    1.34    0.15
   3   3  -5    1.33    0.16
  -3  -3   5    1.15    0.14
   3   3   5    1.40    0.11
  -3   3   5    1.46    0.15
   3  -4  -5   38.18    1.07
  -3   4  -5   38.04    0.99
  -4  -3  -5   38.11    1.02
  -4  -3  -5   37.21    1.03
   3  -4  -5   37.59    1.07
   4   3  -5   37.30    1.07
  -3   4  -5   37.54    0.99
   4   3  -5   41.00    1.08
   4   3   5   38.64    0.99
  -4  -3   5   36.97    1.07
  -3   4   5   38.13    1.06
  -2   4  -5  266.00    6.43
   4   2  -5  264.20    6.45
   2  -4  -5  252.27    6.43
  -4  -2  -5  247.01    6.44
  -2   4  -5  253.43    7.05
   2  -4  -5  256.31    6.43
   4   2  -5  247.68    6.43
  -4  -2  -5  262.63    6.39
  -2   4   5  260.52    6.42
  -4  -2   5  254.39    6.44
  -1   4  -5   31.82    0.86
   4   1  -5   33.30    0.91
   4   1  -5   30.06    0.90
  -4  -1  -5   30.97    0.84
   1  -4  -5   31.82    0.90
   1  -4  -5   32.51    0.90
  -1   4  -5   31.53    0.85
  -4  -1  -5   31.97    0.84
  -4  -1   5   31.71    0.90
  -1   4   5   31.97    0.88
   0  -4  -5   14.06    0.48
   0  -4  -5   14.42    0.47
  -4   0  -5   14.29    0.40
  -4   0  -5   15.27    0.40
   4   0  -5   14.73    0.49
   0   4  -5   13.89    0.45
   4   0  -5   14.24    0.49
   0   4  -5   14.66    0.45
  -4   0   5   14.67    0.48
   0  -4   5   14.75    0.40
   0   4   5   14.73    0.46
   4  -1  -5   21.50    0.64
  -1  -4  -5   21.06    0.62
   1   4  -5   20.01    0.61
  -4   1  -5   20.99    0.54
   1   4  -5   21.35    0.62
  -4   1  -5   21.14    0.54
  -1  -4  -5   20.05    0.62
   4  -1  -5   20.52    0.64
  -4   1   5   21.38    0.63
  -1  -4   5   20.38    0.59
   1   4   5   21.14    0.60
  -2  -4  -5   25.01    0.70
  -4   2  -5   24.43    0.62
  -4   2  -5   23.94    0.62
   4  -2  -5   26.39    0.73
   2   4  -5   23.08    0.71
   2   4  -5   24.15    0.72
  -2  -4  -5   23.15    0.70
   4  -2  -5   23.22    0.72
   2   4   5   24.10    0.67
  -4   2   5   24.04    0.72
  -2  -4   5   24.34    0.70
   4  -3  -5   21.16    0.69
   3   4  -5   21.75    0.68
   3   4  -5   21.76    0.69
  -3  -4  -5   22.76    0.67
   4  -3  -5   23.59    0.69
  -4   3  -5   23.07    0.59
  -4   3  -5   22.35    0.59
  -3  -4  -5   23.26    0.66
   3   4   5   22.37    0.63
  -3  -4   5   21.67    0.68
  -4   3   5   23.30    0.69
  -4   4  -5   29.37    0.77
   4   4  -5   30.80    0.87
  -4   4  -5   29.15    0.77
   4  -4  -5   26.96    0.85
   4   4  -5   28.61    0.85
  -4  -4  -5   30.21    0.82
  -4  -4  -5   28.42    0.83
   4   4   5   28.50    0.79
  -4  -4   5   28.21    0.86
  -4   4   5   28.94    0.85
   5   4  -5    6.44    0.35
  -4   5  -5    6.34    0.24
  -5  -4  -5    6.06    0.30
   5   4  -5    6.27    0.35
   4  -5  -5    5.76    0.36
  -4   5  -5    5.93    0.25
  -5  -4  -5    5.53    0.32
  -5  -4   5    5.52    0.34
  -4   5   5    5.86    0.33
   5   4   5    6.25    0.25
   3  -5  -5  127.67    3.07
  -3   5  -5  120.83    2.99
   5   3  -5  116.44    3.06
  -5  -3  -5  122.16    3.02
  -5  -3  -5  115.81    3.02
  -3   5  -5  112.83    2.98
   5   3  -5  124.70    3.08
   3  -5  -5  116.78    3.06
  -3   5   5  117.02    3.05
  -5  -3   5  111.62    3.06
   5   3   5  118.28    2.98
   5   2  -5   37.78    1.09
  -5  -2  -5   38.95    1.04
   2  -5  -5   36.48    1.08
  -5  -2  -5   36.60    1.04
  -2   5  -5   39.08    1.03
   2  -5  -5   41.46    1.09
   5   2  -5   41.45    1.11
  -2   5  -5   37.60    1.03
  -2   5   5   37.06    1.07
   5   2   5   40.50    1.00
  -5  -2   5   38.15    1.10
   1  -5  -5   48.84    1.30
   1  -5  -5   46.03    1.29
  -1   5  -5   46.63    1.26
  -5  -1  -5   46.43    1.24
   5   1  -5   50.21    1.32
  -1   5  -5   48.04    1.26
   5   1  -5   45.48    1.30
  -5  -1  -5   49.32    1.24
  -5  -1   5   47.00    1.30
  -1   5   5   47.06    1.28
   1  -5   5   47.65    1.21
   0   5  -5   31.86    0.89
   0   5  -5   32.82    0.89
  -5   0  -5   31.33    0.85
  -5   0  -5   32.07    0.85
   0  -5  -5   30.97    0.91
   5   0  -5   32.27    0.93
   5   0  -5   33.82    0.94
   0  -5  -5   32.57    0.91
   0  -5   5   31.39    0.85
   0   5   5   31.70    0.89
  -5   0   5   31.93    0.92
  -1  -5  -5   42.60    1.13
  -1  -5  -5   40.00    1.13
  -5   1  -5   41.31    1.05
   5  -1  -5   39.97    1.14
  -5   1  -5   41.33    1.05
   1   5  -5   43.15    1.13
   1   5  -5   40.14    1.12
   5  -1  -5   41.33    1.15
  -1  -5   5   41.59    1.09
   1   5   5   40.42    1.11
  -5   1   5   38.88    1.13
  -5   2  -5    1.39    0.11
  -2  -5  -5    1.07    0.14
   2   5  -5    1.27    0.16
  -2  -5  -5    1.15    0.17
   5  -2  -5    0.90    0.16
   2   5  -5    1.02    0.16
  -5   2  -5    1.47    0.11
   5  -2  -5    1.75    0.19
   2   5   5    1.30    0.13
  -2  -5   5    1.25    0.15
  -5   2   5    1.98    0.19
   3   5  -5   28.50    0.88
  -3  -5  -5   29.83    0.87
  -5   3  -5   29.54    0.79
   3   5  -5   30.41    0.89
  -5   3  -5   30.09    0.79
   5  -3  -5   30.16    0.89
  -3  -5  -5   31.30    0.87
  -3  -5   5   30.45    0.88
  -5   3   5   30.14    0.88
   3   5   5   30.33    0.84
  -5   4  -5    0.26    0.08
  -5   4  -5    0.10    0.08
   4   5  -5    0.25    0.15
  -4  -5  -5    0.27    0.12
  -4  -5  -5    0.05    0.14
   4   5  -5    0.07    0.13
   5  -4  -5    0.17    0.15
   4   5   5    0.19    0.10
  -5   4   5    0.37    0.15
  -4  -5   5    0.23    0.15
   5  -5  -5    5.12    0.34
  -5   5  -5    5.23    0.23
  -5   5  -5    4.78    0.24
  -5  -5  -5    4.76    0.33
   5   5  -5    5.24    0.34
  -5  -5  -5    5.12    0.30
   5   5  -5    4.96    0.34
  -5  -5   5    4.95    0.34
  -5   5   5    4.96    0.33
   5   5   5    4.75    0.25
  -5   6  -5    1.34    0.15
  -6  -5  -5    1.54    0.19
  -6  -5  -5    1.05    0.20
   6   5  -5    1.69    0.23
   5  -6  -5    0.94    0.20
  -5   6  -5    1.67    0.15
   6   5   5    1.37    0.14
  -6  -5   5    1.09    0.19
  -5   6   5    1.56    0.21
   4  -6  -5   92.57    2.45
   6   4  -5   93.27    2.45
  -4   6  -5   94.05    2.38
  -6  -4  -5   96.37    2.42
  -4   6  -5   96.33    2.38
  -6  -4  -5   90.06    2.42
  -6  -4   5   89.13    2.46
  -4   6   5   93.30    2.44
   6   4   5   91.13    2.37
   3  -6  -5   10.61    0.43
   6   3  -5    8.10    0.42
  -3   6  -5    9.00    0.32
  -3   6  -5    8.40    0.34
  -6  -3  -5    8.88    0.36
  -6  -3  -5    8.20    0.37
  -3   6   5    8.59    0.40
  -6  -3   5    8.69    0.42
   6   3   5    8.50    0.29
  -6  -2  -5  288.87    7.33
  -2   6  -5  307.71    7.40
  -2   6  -5  286.86    7.46
  -6  -2  -5  305.59    7.33
   6   2  -5  279.17    7.37
   2  -6  -5  290.07    7.37
   6   2   5  299.57    7.28
   2  -6   5  301.18    7.29
  -2   6   5  295.11    7.36
  -6  -2   5  280.51    7.38
   1  -6  -5   15.36    0.52
  -6  -1  -5   14.32    0.45
  -1   6  -5   13.69    0.47
  -6  -1  -5   14.27    0.46
   1  -6  -5   14.24    0.52
   6   1  -5   13.36    0.52
  -1   6  -5   14.83    0.47
  -1   6   5   14.48    0.50
   1  -6   5   14.75    0.42
  -6  -1   5   13.94    0.52
  -6   0  -5   42.70    1.09
   0   6  -5   43.26    1.14
   0   6  -5   40.40    1.14
   6   0  -5   40.91    1.17
   0  -6  -5   39.40    1.16
   0  -6  -5   44.13    1.16
  -6   0  -5   40.73    1.09
   0  -6   5   41.23    1.09
   0   6   5   40.07    1.14
  -6   0   5   40.54    1.17
  -1  -6  -5    0.14    0.13
   1   6  -5    0.32    0.14
   6  -1  -5    0.07    0.16
  -1  -6  -5    0.25    0.15
  -6   1  -5    0.25    0.09
  -6   1  -5    0.35    0.08
   1   6  -5    0.18    0.13
  -6   1   5    0.15    0.14
  -1  -6   5    0.24    0.11
   1   6   5    0.12    0.12
  -2  -6  -5    1.00    0.15
  -6   2  -5    0.27    0.08
   2   6  -5    0.52    0.14
  -2  -6  -5    0.23    0.16
   6  -2  -5    0.23    0.16
   2   6  -5    0.09    0.14
  -6   2  -5    0.36    0.09
  -6   2   5    0.22    0.15
   2   6   5    0.23    0.12
  -2  -6   5    0.25    0.12
   3   6  -5   63.72    1.80
   6  -3  -5   64.42    1.81
   3   6  -5   71.41    1.83
  -6   3  -5   68.37    1.72
  -3  -6  -5   66.01    1.80
  -3  -6  -5   70.13    1.80
  -6   3   5   66.76    1.81
  -3  -6   5   69.51    1.80
   3   6   5   65.54    1.77
  -6   4  -5    4.94    0.22
  -6   4  -5    5.16    0.24
   4   6  -5    4.90    0.34
  -4  -6  -5    5.02    0.30
  -4  -6  -5    4.83    0.33
   4   6  -5    5.00    0.33
   6  -4  -5    5.33    0.36
  -6   4   5    4.60    0.34
  -4  -6   5    4.74    0.34
   4   6   5    4.84    0.27
   6  -5  -5    3.42    0.29
   5   6  -5    4.57    0.35
  -6   5  -5    4.12    0.22
  -5  -6  -5    3.30    0.27
  -5  -6  -5    4.45    0.31
  -6   5  -5    4.08    0.24
  -6   5   5    3.60    0.28
  -5  -6   5    4.12    0.31
   5   6   5    4.07    0.26
  -6   6  -5    5.44    0.29
   6  -6  -5    4.61    0.39
  -6  -6  -5    4.65    0.38
  -6   6  -5    5.56    0.27
  -6  -6  -5    5.25    0.35
   6   6  -5    5.61    0.39
   6   6   5    5.39    0.29
  -6   6   5    5.46    0.38
  -6  -6   5    5.71    0.41
  -7  -6  -5   32.13    1.04
  -6   7  -5   34.50    0.97
   6  -7  -5   33.93    1.06
   7   6  -5   32.69    1.06
  -6   7  -5   36.37    0.96
  -7  -6  -5   35.55    1.04
  -6   7   5   33.52    1.04
  -7  -6   5   32.22    1.07
   7   6   5   33.58    0.97
   7   5  -5   79.72    2.20
  -5   7  -5   81.73    2.12
   5  -7  -5   80.14    2.20
  -7  -5  -5   85.57    2.18
  -7  -5  -5   78.35    2.17
  -5   7  -5   84.20    2.12
  -5   7   5   79.92    2.18
   7   5   5   81.90    2.11
  -7  -5   5   80.32    2.21
  -7  -4  -5    7.89    0.38
  -4   7  -5    7.82    0.33
  -7  -4  -5    7.22    0.40
  -4   7  -5    7.46    0.34
   7   4  -5    7.81    0.43
   4  -7  -5    7.57    0.43
  -7  -4   5    7.31    0.43
   7   4   5    7.82    0.30
  -4   7   5    8.04    0.42
  -3   7  -5   57.75    1.58
  -3   7  -5   61.56    1.58
  -7  -3  -5   59.46    1.61
  -7  -3  -5   63.98    1.61
   7   3  -5   57.91    1.65
   3  -7  -5   56.46    1.64
  -3   7   5   59.57    1.63
   3  -7   5   60.38    1.53
  -7  -3   5   59.20    1.65
   7   3   5   59.25    1.54
  -2   7  -5    0.16    0.12
  -7  -2  -5    0.11    0.12
  -2   7  -5    0.00    0.13
   2  -7  -5    0.15    0.16
   7   2  -5    0.12    0.18
  -7  -2  -5    0.21    0.13
  -2   7   5    0.02    0.15
  -7  -2   5    0.30    0.17
   2  -7   5    0.39    0.09
   7   2   5    0.27    0.08
  -1   7  -5   25.27    0.77
  -1   7  -5   27.03    0.77
  -7  -1  -5   26.73    0.75
  -7  -1  -5   24.88    0.74
   1  -7  -5   24.51    0.81
   7   1  -5   24.78    0.81
  -1   7   5   25.46    0.79
   1  -7   5   27.06    0.72
  -7  -1   5   25.46    0.81
   0   7  -5    0.25    0.14
   7   0  -5    0.38    0.18
  -7   0  -5    0.28    0.11
   0  -7  -5    0.54    0.16
  -7   0  -5    0.32    0.10
   0   7  -5    0.34    0.13
   0  -7  -5    0.24    0.16
   0   7   5    0.28    0.15
  -7   0   5    0.48    0.16
   0  -7   5    0.39    0.11
   7  -1  -5   24.91    0.83
   1   7  -5   27.64    0.81
  -1  -7  -5   25.56    0.83
  -1  -7  -5   28.67    0.82
  -7   1  -5   27.45    0.74
  -7   1  -5   25.93    0.74
   1   7  -5   25.88    0.81
  -1  -7   5   27.07    0.77
  -7   1   5   26.85    0.83
   1   7   5   25.78    0.79
  -2  -7  -5  129.44    3.19
  -7   2  -5  118.96    3.10
  -2  -7  -5  120.83    3.18
  -7   2  -5  125.71    3.10
   2   7  -5  119.32    3.18
   7  -2  -5  120.07    3.19
   2   7  -5  128.69    3.19
   2   7   5  120.45    3.15
  -7   2   5  123.39    3.19
  -2  -7   5  123.41    3.16
   3   7  -5   15.20    0.54
  -3  -7  -5   13.22    0.55
  -7   3  -5   13.23    0.43
  -7   3  -5   14.05    0.43
   3   7  -5   12.75    0.54
  -3  -7  -5   14.52    0.52
   7  -3  -5   13.89    0.55
  -3  -7   5   14.39    0.52
   3   7   5   13.75    0.49
  -7   3   5   12.95    0.54
   4   7  -5  177.49    4.34
  -4  -7  -5  164.23    4.30
  -7   4  -5  168.39    4.22
  -4  -7  -5  171.97    4.30
   7  -4  -5  167.86    4.32
  -7   4  -5  164.25    4.22
   4   7  -5  162.15    4.31
  -4  -7   5  170.86    4.32
   4   7   5  164.82    4.26
  -7   4   5  167.72    4.31
  -5  -7  -5    0.58    0.19
  -5  -7  -5    0.49    0.21
  -7   5  -5    0.58    0.14
   5   7  -5    0.79    0.22
  -7   5  -5    0.56    0.12
   7  -5  -5    0.48    0.23
   5   7   5    0.25    0.15
  -5  -7   5    0.61    0.21
  -7   5   5    0.48    0.19
  -6  -7  -5    5.93    0.39
   7  -6  -5    5.78    0.44
   6   7  -5    6.36    0.44
  -7   6  -5    5.84    0.31
  -6  -7  -5    5.44    0.43
  -7   6  -5    6.43    0.30
   6   7   5    5.85    0.33
  -7   6   5    5.84    0.42
  -6  -7   5    6.20    0.44
   7   7  -5   23.93    0.89
  -7  -7  -5   27.18    0.87
   7  -7  -5   27.38    0.90
  -7   7  -5   28.09    0.78
  -7   7  -5   26.01    0.79
  -7  -7  -5   25.68    0.88
  -7  -7   5   23.63    0.90
   7   7   5   25.53    0.79
  -7   7   5   25.29    0.88
   7  -8  -5   67.51    1.93
  -8  -7  -5   66.64    1.92
  -7   8  -5   68.33    1.84
   8   7  -5   66.05    1.94
  -8  -7  -5   73.30    1.92
  -7   8  -5   72.18    1.84
  -8  -7   5   68.87    1.96
  -7   8   5   68.34    1.92
   8   7   5   66.71    1.84
  -8  -6  -5    8.08    0.50
  -6   8  -5    8.45    0.38
  -6   8  -5    8.35    0.41
   6  -8  -5    8.19    0.50
  -8  -6  -5    8.48    0.45
   8   6  -5    8.95    0.52
  -8  -6   5    7.71    0.50
   8   6   5    8.98    0.38
  -6   8   5    8.66    0.48
  -8  -5  -5    0.28    0.20
  -5   8  -5    0.29    0.16
   8   5  -5    0.24    0.23
  -8  -5  -5    0.21    0.18
   5  -8  -5    0.35    0.22
  -5   8  -5    0.19    0.13
  -5   8   5    0.34    0.20
  -8  -5   5    0.42    0.20
   8   5   5    0.48    0.14
   5  -8   5    0.40    0.11
  -8  -4  -5    4.85    0.34
   8   4  -5    4.97    0.40
  -4   8  -5    4.86    0.32
  -8  -4  -5    4.82    0.37
   4  -8  -5    4.67    0.40
  -4   8  -5    5.02    0.29
   8   4   5    5.30    0.27
  -8  -4   5    4.95    0.40
   4  -8   5    4.71    0.22
  -4   8   5    4.87    0.38
   3  -8  -5   19.98    0.74
   8   3  -5   20.65    0.74
  -3   8  -5   20.17    0.67
  -3   8  -5   22.14    0.66
  -8  -3  -5   21.70    0.68
  -8  -3  -5   21.14    0.70
  -3   8   5   21.58    0.72
  -8  -3   5   20.85    0.75
   3  -8   5   21.46    0.61
   8   3   5   21.66    0.62
   8   2  -5    1.40    0.22
  -2   8  -5    2.07    0.19
  -8  -2  -5    1.70    0.19
  -2   8  -5    1.60    0.19
  -8  -2  -5    1.86    0.19
   2  -8  -5    1.57    0.22
   8   2   5    2.14    0.14
  -8  -2   5    1.40    0.21
  -2   8   5    2.04    0.23
   2  -8   5    1.82    0.15
   8   1  -5    3.57    0.29
  -1   8  -5    3.75    0.27
  -8  -1  -5    3.37    0.26
  -1   8  -5    3.19    0.24
   1  -8  -5    3.24    0.28
  -8  -1  -5    3.74    0.25
  -1   8   5    2.87    0.24
  -8  -1   5    3.54    0.28
   1  -8   5    3.53    0.22
  -8   0  -5    1.02    0.15
   0   8  -5    0.99    0.16
   8   0  -5    0.93    0.21
  -8   0  -5    0.98    0.13
   0   8  -5    1.12    0.19
   0  -8  -5    0.95    0.21
   0  -8   5    1.05    0.14
  -8   0   5    0.96    0.20
   0   8   5    1.06    0.19
  -8   1  -5   19.06    0.59
   1   8  -5   20.70    0.66
  -8   1  -5   19.95    0.58
   1   8  -5   18.43    0.65
  -1  -8  -5   19.56    0.69
   8  -1  -5   18.07    0.68
  -1  -8   5   19.21    0.61
   1   8   5   19.20    0.64
  -8   1   5   18.26    0.67
   2   8  -5   13.86    0.56
   8  -2  -5   14.03    0.59
  -8   2  -5   14.45    0.46
  -8   2  -5   14.51    0.47
   2   8  -5   15.54    0.56
  -2  -8  -5   13.47    0.58
  -8   2   5   14.12    0.57
  -2  -8   5   14.11    0.52
   2   8   5   14.15    0.53
  -3  -8  -5  358.12    9.27
  -8   3  -5  364.42    9.19
  -8   3  -5  357.91    9.31
   3   8  -5  370.55    9.28
   3   8  -5  392.00    9.30
   8  -3  -5  371.22    9.28
  -3  -8   5  365.78    9.26
   3   8   5  378.79    9.25
  -8   3   5  364.08    9.28
  -8   4  -5   26.74    0.80
   8  -4  -5   27.93    0.91
  -4  -8  -5   26.50    0.91
  -8   4  -5   28.43    0.80
   4   8  -5   28.46    0.91
  -4  -8   5   29.40    0.91
  -8   4   5   28.40    0.90
   4   8   5   27.82    0.85
  -8   5  -5   26.79    0.79
   8  -5  -5   27.09    0.91
  -5  -8  -5   26.12    0.89
   5   8  -5   26.82    0.90
  -8   5  -5   27.09    0.78
   5   8   5   27.07    0.83
  -8   5   5   27.99    0.90
  -5  -8   5   26.50    0.90
   6   8  -5    8.55    0.49
  -8   6  -5    8.20    0.39
  -6  -8  -5    7.31    0.48
  -8   6  -5    8.94    0.36
   8  -6  -5    8.35    0.51
  -6  -8   5    8.37    0.52
   6   8   5    8.16    0.40
  -8   6   5    7.68    0.48
   8  -7  -5   55.64    1.61
   7   8  -5   55.10    1.63
  -8   7  -5   56.78    1.52
  -7  -8  -5   55.43    1.61
  -8   7  -5   57.56    1.51
  -8   7   5   56.41    1.60
   7   8   5   53.90    1.53
  -7  -8   5   52.85    1.62
   8   8  -5    8.21    0.56
  -8   8  -5    8.65    0.44
   8  -8  -5    9.13    0.56
  -8   8  -5    8.79    0.41
  -8  -8  -5    9.02    0.55
   8   8   5    8.71    0.43
  -8  -8   5    9.46    0.59
  -8   8   5    8.64    0.54
   9   8  -5   21.02    0.87
  -8   9  -5   20.98    0.74
   8  -9  -5   21.20    0.84
  -9  -8  -5   20.52    0.83
  -9  -8   5   20.57    0.86
  -8   9   5   20.64    0.83
   9   8   5   21.34    0.72
   7  -9  -5    0.61    0.28
   9   7  -5    0.28    0.26
  -7   9  -5    0.55    0.18
  -9  -7  -5    0.47    0.26
  -7   9  -5    0.63    0.20
   9   7   5    0.49    0.17
  -9  -7   5    0.63    0.28
  -7   9   5    0.69    0.27
  -9  -6  -5    0.39    0.20
   9   6  -5    0.39    0.26
  -6   9  -5    0.04    0.18
  -9  -6  -5   -0.14    0.22
   6  -9  -5   -0.03    0.24
  -6   9  -5   -0.02    0.14
  -9  -6   5    0.10    0.23
   6  -9   5   -0.10    0.12
   9   6   5    0.12    0.15
  -6   9   5   -0.05    0.22
   9   5  -5   50.64    1.52
  -5   9  -5   49.45    1.43
  -5   9  -5   52.94    1.43
   5  -9  -5   50.63    1.52
  -9  -5  -5   51.31    1.49
  -9  -5  -5   55.91    1.50
  -5   9   5   51.28    1.50
  -9  -5   5   51.03    1.53
   5  -9   5   52.05    1.37
   9   5   5   52.59    1.41
  -4   9  -5   60.58    1.60
  -9  -4  -5   62.21    1.64
   4  -9  -5   57.14    1.67
  -9  -4  -5   57.37    1.64
  -4   9  -5   58.09    1.60
   9   4  -5   57.69    1.68
  -4   9   5   58.63    1.66
   4  -9   5   60.02    1.55
  -9  -4   5   58.06    1.69
   9   4   5   58.34    1.57
   9   3  -5   24.27    0.85
  -9  -3  -5   23.28    0.79
  -9  -3  -5   25.77    0.79
  -3   9  -5   23.77    0.77
   3  -9  -5   23.19    0.84
  -3   9  -5   26.25    0.77
   3  -9   5   24.76    0.71
   9   3   5   25.42    0.71
  -3   9   5   22.73    0.81
  -9  -3   5   23.86    0.84
   9   2  -5    1.14    0.26
  -2   9  -5    0.56    0.16
  -2   9  -5    0.54    0.19
  -9  -2  -5    0.56    0.15
   2  -9  -5    0.24    0.19
  -9  -2  -5    0.62    0.18
   2  -9   5    0.51    0.12
  -2   9   5    0.53    0.20
  -9  -2   5    0.57    0.21
   9   2   5    0.74    0.12
   9   1  -5   70.94    1.98
  -1   9  -5   75.17    1.94
  -1   9  -5   69.81    1.93
  -9  -1  -5   73.54    1.91
   1  -9  -5   72.48    1.98
  -9  -1  -5   71.10    1.91
   9   1   5   72.29    1.85
  -1   9   5   71.20    1.95
   1  -9   5   72.76    1.89
  -9  -1   5   70.45    1.98
   9   0  -5   17.11    0.67
   0  -9  -5   17.23    0.67
  -9   0  -5   17.19    0.57
   0   9  -5   18.17    0.64
   0   9  -5   19.32    0.63
  -9   0  -5   17.51    0.58
  -9   0   5   17.14    0.66
   0  -9   5   17.25    0.57
   0   9   5   16.93    0.63
   1   9  -5    0.92    0.19
  -9   1  -5    0.89    0.16
  -1  -9  -5    0.42    0.22
   9  -1  -5    1.04    0.24
  -9   1  -5    0.80    0.15
   1   9  -5    0.76    0.19
   1   9   5    0.72    0.19
  -1  -9   5    0.98    0.17
  -9   1   5    1.03    0.22
  -2  -9  -5   45.55    1.32
   2   9  -5   49.51    1.32
  -9   2  -5   42.85    1.21
  -9   2  -5   44.69    1.21
   2   9  -5   42.87    1.29
   9  -2  -5   43.79    1.31
   2   9   5   43.00    1.27
  -2  -9   5   44.19    1.26
  -9   2   5   43.77    1.30
  -9   3  -5    0.51    0.15
   3   9  -5    0.52    0.21
   9  -3  -5    0.54    0.24
  -3  -9  -5    0.47    0.24
  -9   3  -5    0.24    0.11
  -3  -9   5    0.40    0.17
   3   9   5    0.20    0.17
  -9   3   5    0.90    0.23
  -9   4  -5   78.97    2.07
  -4  -9  -5   79.10    2.18
   4   9  -5   77.05    2.17
  -9   4  -5   80.31    2.07
   9  -4  -5   78.87    2.17
  -4  -9   5   80.45    2.16
   4   9   5   78.00    2.12
  -9   4   5   81.40    2.17
   9  -5  -5    1.60    0.28
  -9   5  -5    1.65    0.19
   5   9  -5    1.67    0.29
  -9   5  -5    1.32    0.17
  -5  -9  -5    1.29    0.28
   5   9   5    1.35    0.21
  -5  -9   5    1.63    0.26
  -9   5   5    1.01    0.25
  -9   6  -5    7.18    0.39
   6   9  -5    6.77    0.52
   9  -6  -5    7.33    0.50
  -6  -9  -5    6.62    0.50
  -9   6  -5    7.63    0.36
  -9   6   5    7.00    0.48
  -6  -9   5    6.87    0.51
   6   9   5    7.30    0.41
   9  -7  -5   21.52    0.81
  -9   7  -5   21.33    0.68
  -7  -9  -5   18.63    0.80
   7   9  -5   20.28    0.82
  -9   7  -5   20.08    0.69
  -7  -9   5   19.89    0.83
  -9   7   5   20.20    0.80
   7   9   5   19.78    0.71
   9  -8  -5   21.19    0.87
  -8  -9  -5   22.76    0.88
  -9   8  -5   21.80    0.75
   8   9  -5   22.62    0.88
  -9   8   5   21.99    0.85
  -8  -9   5   22.81    0.90
   8   9   5   21.26    0.76
  -9   9  -5   78.55    2.13
   9   9  -5   79.06    2.24
   9  -9  -5   76.66    2.22
  -9  -9  -5   77.55    2.22
  -9   9   5   80.85    2.23
  -9  -9   5   80.21    2.27
   9   9   5   76.34    2.13
  10   9  -5    0.65    0.32
 -10  -9  -5    1.03    0.34
  -9  10  -5    0.87    0.26
   9 -10  -5    0.91    0.34
  -9  10   5    0.38    0.32
 -10  -9   5    0.62    0.35
   8 -10  -5    5.96    0.47
  -8  10  -5    5.09    0.36
 -10  -8  -5    4.69    0.44
  10   8  -5    5.69    0.48
 -10  -8   5    5.18    0.48
  -8  10   5    5.36    0.43
 -10  -7  -5    0.18    0.27
  -7  10  -5   -0.12    0.21
  10   7  -5   -0.15    0.27
   7 -10  -5   -0.13    0.28
 -10  -7   5   -0.37    0.26
  10   7   5    0.22    0.18
  -7  10   5    0.12    0.27
  -6  10  -5    5.31    0.43
   6 -10  -5    5.15    0.41
  10   6  -5    5.30    0.43
 -10  -6  -5    6.84    0.51
 -10  -6   5    5.85    0.45
  -6  10   5    6.37    0.50
  10   6   5    6.38    0.37
  -5  10  -5  122.68    3.14
  -5  10  -5  117.85    3.14
   5 -10  -5  121.31    3.22
  10   5  -5  120.28    3.23
 -10  -5  -5  121.25    3.19
  10   5   5  121.38    3.11
   5 -10   5  119.65    3.08
 -10  -5   5  119.99    3.24
  -5  10   5  121.49    3.20
  10   4  -5    2.62    0.33
 -10  -4  -5    1.51    0.25
   4 -10  -5    1.33    0.28
 -10  -4  -5    2.14    0.26
  -4  10  -5    1.92    0.24
  -4  10  -5    1.80    0.22
  10   4   5    1.75    0.19
 -10  -4   5    2.19    0.32
   4 -10   5    1.52    0.16
  -4  10   5    1.26    0.27
  10   3  -5   34.82    1.15
 -10  -3  -5   34.88    1.10
 -10  -3  -5   37.89    1.09
   3 -10  -5   34.81    1.14
  -3  10  -5   38.34    1.08
  -3  10  -5   36.00    1.08
 -10  -3   5   37.54    1.16
  10   3   5   35.80    1.01
  -3  10   5   35.40    1.12
   3 -10   5   36.44    1.02
  -2  10  -5   12.17    0.50
 -10  -2  -5   12.25    0.49
   2 -10  -5   10.92    0.57
 -10  -2  -5   11.90    0.51
  -2  10  -5   11.37    0.52
  10   2  -5   11.72    0.59
 -10  -2   5   10.87    0.57
   2 -10   5   11.89    0.44
  -2  10   5   10.69    0.55
  10   2   5   11.59    0.41
 -10  -1  -5   55.50    1.55
  10   1  -5   54.18    1.62
  -1  10  -5   58.88    1.58
  -1  10  -5   55.82    1.58
 -10  -1  -5   59.27    1.55
   1 -10  -5   55.82    1.62
   1 -10   5   55.87    1.52
  10   1   5   55.77    1.47
 -10  -1   5   53.71    1.61
  -1  10   5   58.27    1.60
  10   0  -5    3.97    0.36
 -10   0  -5    3.35    0.26
   0  10  -5    2.88    0.28
   0  10  -5    4.19    0.34
 -10   0  -5    4.35    0.30
   0 -10  -5    3.80    0.35
   0 -10   5    4.02    0.29
   0  10   5    4.27    0.33
 -10   0   5    3.31    0.33
   1  10  -5   23.55    0.78
  -1 -10  -5   21.84    0.81
 -10   1  -5   23.11    0.70
 -10   1  -5   21.79    0.71
  10  -1  -5   22.84    0.82
   1  10  -5   23.30    0.80
   1  10   5   20.86    0.77
  -1 -10   5   22.45    0.73
 -10   1   5   22.78    0.81
 -10   2  -5   10.60    0.44
  -2 -10  -5   10.14    0.57
 -10   2  -5   10.62    0.42
   2  10  -5   10.39    0.53
   2  10  -5   11.43    0.55
  10  -2  -5   10.80    0.56
  -2 -10   5   10.39    0.48
   2  10   5    9.81    0.49
 -10   2   5   10.79    0.54
   3  10  -5    2.89    0.32
 -10   3  -5    3.32    0.26
 -10   3  -5    3.14    0.24
  -3 -10  -5    2.91    0.33
  10  -3  -5    2.91    0.32
   3  10   5    3.35    0.29
 -10   3   5    2.70    0.30
  -3 -10   5    3.08    0.29
   4  10  -5   16.44    0.72
  -4 -10  -5   16.79    0.74
 -10   4  -5   18.01    0.58
 -10   4  -5   17.73    0.61
  10  -4  -5   17.46    0.72
  -4 -10   5   17.61    0.69
   4  10   5   18.59    0.66
 -10   4   5   17.69    0.72
   5  10  -5    6.79    0.51
 -10   5  -5    6.69    0.38
  -5 -10  -5    6.69    0.53
 -10   5  -5    7.17    0.36
  10  -5  -5    6.99    0.52
  -5 -10   5    6.70    0.49
 -10   5   5    6.24    0.50
   5  10   5    6.95    0.42
   6  10  -5   29.61    1.03
  -6 -10  -5   28.61    1.02
 -10   6  -5   28.99    0.90
 -10   6  -5   29.14    0.88
  10  -6  -5   30.37    1.02
   6  10   5   29.91    0.94
 -10   6   5   28.97    1.01
  -6 -10   5   28.86    1.02
  10  -7  -5   11.48    0.63
   7  10  -5   11.78    0.66
  -7 -10  -5   10.99    0.65
 -10   7   5   10.78    0.61
   7  10   5   10.33    0.52
  -7 -10   5   10.59    0.64
 -10   8  -5  100.28    2.71
   8  10  -5   98.64    2.82
  -8 -10  -5  101.35    2.82
  10  -8  -5  104.77    2.82
   8  10   5  105.26    2.75
  -8 -10   5  101.59    2.85
 -10   8   5  106.98    2.82
 -10   9  -5    0.67    0.25
  10  -9  -5    0.36    0.32
   9  10  -5    0.50    0.33
  -9 -10  -5    0.72    0.33
 -10   9   5    0.37    0.32
  -9 -10   5    0.43    0.35
 -10 -10  -5   52.92    1.66
 -10  10  -5   53.08    1.55
  10 -10  -5   53.76    1.66
  10  10  -5   52.58    1.68
 -10 -10   5   53.59    1.70
 -10  10   5   53.36    1.66
 -10  11  -5    4.24    0.38
  11  10  -5    4.75    0.51
 -11 -10  -5    3.65    0.46
  10 -11  -5    4.09    0.47
 -10  11   5    4.24    0.48
 -11 -10   5    4.04    0.48
  -9  11  -5    0.37    0.27
   9 -11  -5    0.41    0.35
  11   9  -5    0.07    0.32
 -11  -9  -5    0.55    0.35
  -9  11   5    0.83    0.34
 -11  -9   5    0.91    0.37
  -8  11  -5    0.44    0.25
 -11  -8  -5    0.51    0.32
   8 -11  -5    0.36    0.31
  11   8  -5    0.59    0.34
  -8  11   5    0.15    0.29
 -11  -8   5    0.37    0.32
 -11  -7  -5   10.03    0.63
   7 -11  -5    9.81    0.66
  -7  11  -5    9.74    0.55
  11   7  -5    9.33    0.67
 -11  -7   5   10.55    0.67
  -7  11   5   10.05    0.63
   6 -11  -5   86.43    2.35
 -11  -6  -5   82.76    2.32
  -6  11  -5   82.03    2.26
  11   6  -5   82.60    2.36
 -11  -6   5   83.27    2.37
  -6  11   5   84.23    2.33
   5 -11  -5    0.79    0.31
  -5  11  -5    0.34    0.23
 -11  -5  -5    0.40    0.26
  11   5  -5    0.84    0.31
 -11  -5   5    0.75    0.31
  -5  11   5    0.77    0.28
   4 -11  -5  168.28    4.41
  11   4  -5  164.40    4.42
 -11  -4  -5  167.57    4.38
  -4  11  -5  168.74    4.35
  -4  11   5  172.12    4.40
 -11  -4   5  171.94    4.44
  -3  11  -5    2.45    0.28
 -11  -3  -5    2.83    0.30
  11   3  -5    2.65    0.33
   3 -11  -5    2.17    0.32
 -11  -3   5    2.71    0.34
  11   3   5    2.58    0.21
   3 -11   5    3.09    0.23
  -3  11   5    2.60    0.33
  11   2  -5    3.19    0.35
  -2  11  -5    2.98    0.30
   2 -11  -5    2.73    0.33
 -11  -2  -5    3.75    0.30
 -11  -2  -5    3.85    0.32
  -2  11   5    3.58    0.35
 -11  -2   5    3.84    0.37
  11   2   5    3.72    0.25
   2 -11   5    3.51    0.29
   1 -11  -5    1.67    0.31
 -11  -1  -5    1.50    0.23
  -1  11  -5    1.40    0.25
  11   1  -5    1.16    0.28
 -11  -1  -5    1.64    0.22
  11   1   5    1.67    0.16
  -1  11   5    1.57    0.28
   1 -11   5    1.49    0.19
 -11  -1   5    1.58    0.29
 -11   0  -5   69.08    1.93
  11   0  -5   71.72    2.02
 -11   0  -5   73.43    1.93
   0 -11  -5   71.98    2.02
   0  11  -5   70.43    1.98
   0  11   5   71.36    1.98
 -11   0   5   71.51    2.01
   0 -11   5   70.92    1.92
 -11   1  -5    6.74    0.36
   1  11  -5    6.64    0.48
  11  -1  -5    6.13    0.50
  -1 -11  -5    6.65    0.53
 -11   1  -5    6.61    0.40
  -1 -11   5    6.35    0.39
 -11   1   5    7.29    0.50
   1  11   5    6.52    0.46
 -11   2  -5   10.74    0.45
  11  -2  -5   10.23    0.59
 -11   2  -5   10.64    0.48
   2  11  -5   10.40    0.57
  -2 -11  -5   11.00    0.61
 -11   2   5   10.65    0.58
   2  11   5   10.75    0.54
  -2 -11   5   10.20    0.51
   3  11  -5    1.29    0.29
 -11   3  -5    1.49    0.22
 -11   3  -5    1.45    0.18
  -3 -11  -5    1.06    0.30
  11  -3  -5    1.37    0.30
  -3 -11   5    0.82    0.24
   3  11   5    1.39    0.25
 -11   3   5    0.92    0.26
   4  11  -5   20.65    0.83
 -11   4  -5   21.21    0.69
 -11   4  -5   21.23    0.72
  -4 -11  -5   21.42    0.87
  11  -4  -5   22.00    0.84
 -11   4   5   20.82    0.82
   4  11   5   21.47    0.77
  -4 -11   5   20.35    0.80
  11  -5  -5   43.60    1.37
 -11   5  -5   43.91    1.26
  -5 -11  -5   41.97    1.39
   5  11  -5   43.79    1.38
 -11   5   5   44.09    1.38
   5  11   5   45.81    1.33
  -5 -11   5   44.85    1.37
  11  -6  -5   28.42    1.03
 -11   6  -5   28.28    0.91
   6  11  -5   28.28    1.04
  -6 -11  -5   28.19    1.06
   6  11   5   29.49    0.96
  -6 -11   5   28.64    1.04
 -11   6   5   29.50    1.03
  -7 -11  -5    9.55    0.64
  11  -7  -5    9.72    0.63
 -11   7  -5    9.97    0.51
   7  11  -5    9.12    0.64
  -7 -11   5    8.40    0.62
 -11   7   5    9.01    0.61
   7  11   5    9.20    0.53
 -11   8  -5    1.11    0.26
   8  11  -5    0.64    0.32
  11  -8  -5    1.30    0.37
  -8 -11  -5    1.47    0.37
   8  11   5    1.29    0.28
  -8 -11   5    1.58    0.36
 -11   8   5    1.03    0.33
   9  11  -5   42.71    1.45
  -9 -11  -5   44.02    1.46
  11  -9  -5   43.45    1.43
 -11   9  -5   45.21    1.34
  -9 -11   5   43.58    1.48
 -11   9   5   44.51    1.44
  11 -10  -5    3.08    0.43
 -10 -11  -5    3.72    0.47
  10  11  -5    4.27    0.49
 -11  10  -5    3.38    0.35
 -11  10   5    3.18    0.44
 -10 -11   5    3.88    0.49
 -11  11  -5    2.57    0.35
 -11 -11  -5    4.00    0.50
  11 -11  -5    2.31    0.43
  11  11  -5    1.93    0.42
 -11 -11   5    2.39    0.47
 -11  11   5    1.78    0.41
 -11  12  -5   22.85    0.94
  11 -12  -5   23.51    1.06
 -12 -11  -5   22.88    1.09
  12  11  -5   24.76    1.10
 -12 -11   5   23.63    1.10
 -11  12   5   24.08    1.10
  10 -12  -5   16.47    0.87
 -10  12  -5   16.31    0.77
  12  10  -5   15.99    0.89
 -12 -10  -5   15.20    0.89
 -12 -10   5   17.71    0.95
 -10  12   5   16.79    0.91
 -12  -9  -5    2.53    0.43
  12   9  -5    3.27    0.45
  -9  12  -5    2.71    0.35
   9 -12  -5    1.94    0.40
  -9  12   5    2.00    0.39
 -12  -9   5    3.70    0.48
   8 -12  -5    0.75    0.36
  -8  12  -5    1.16    0.29
 -12  -8  -5    0.85    0.35
  12   8  -5    0.58    0.36
 -12  -8   5    1.16    0.37
  -8  12   5    0.72    0.33
   7 -12  -5    1.07    0.34
 -12  -7  -5    0.97    0.34
  -7  12  -5    1.16    0.29
  12   7  -5    1.27    0.34
 -12  -7   5    1.26    0.37
  -7  12   5    1.26    0.33
   6 -12  -5   12.96    0.73
  12   6  -5   11.94    0.73
  -6  12  -5   12.48    0.63
 -12  -6  -5   11.82    0.68
  -6  12   5   12.33    0.68
 -12  -6   5   11.53    0.72
 -12  -5  -5  102.18    2.77
  -5  12  -5   98.20    2.72
  12   5  -5  100.12    2.81
   5 -12  -5  100.71    2.79
 -12  -5   5  102.61    2.82
  -5  12   5  105.22    2.79
  -4  12  -5    9.50    0.56
  12   4  -5   10.97    0.67
   4 -12  -5   10.90    0.65
 -12  -4  -5    9.89    0.59
  -4  12   5    9.31    0.60
 -12  -4   5   10.65    0.67
  12   3  -5   20.26    0.86
   3 -12  -5   20.81    0.86
  -3  12  -5   21.80    0.80
 -12  -3  -5   20.63    0.80
  -3  12   5   22.76    0.84
 -12  -3   5   21.21    0.88
  -2  12  -5    4.23    0.37
   2 -12  -5    4.62    0.40
 -12  -2  -5    5.10    0.37
  12   2  -5    4.11    0.40
  -2  12   5    3.92    0.36
 -12  -2   5    3.87    0.38
  12   1  -5   22.34    0.90
 -12  -1  -5   22.95    0.81
  -1  12  -5   23.56    0.86
   1 -12  -5   23.85    0.90
 -12  -1   5   23.31    0.90
  -1  12   5   23.42    0.87
   1 -12   5   22.84    0.76
   0 -12  -5   82.13    2.37
  12   0  -5   86.05    2.38
   0  12  -5   84.48    2.34
 -12   0  -5   84.75    2.29
   0 -12   5   87.03    2.28
 -12   0   5   85.78    2.38
   0  12   5   85.25    2.34
   1  12  -5   12.17    0.63
  12  -1  -5   13.68    0.67
 -12   1  -5   12.36    0.56
  -1 -12  -5   13.45    0.70
  -1 -12   5   12.28    0.55
 -12   1   5   13.41    0.68
   1  12   5   11.80    0.61
  -2 -12  -5   50.57    1.57
 -12   2  -5   51.50    1.45
  12  -2  -5   51.40    1.55
   2  12  -5   49.17    1.53
  -2 -12   5   51.85    1.48
   2  12   5   51.10    1.51
 -12   2   5   50.58    1.55
 -12   3  -5   22.66    0.78
  12  -3  -5   23.33    0.91
   3  12  -5   22.81    0.89
  -3 -12  -5   23.11    0.93
 -12   3   5   22.98    0.89
  -3 -12   5   23.01    0.85
   3  12   5   23.24    0.84
  12  -4  -5   27.15    1.01
   4  12  -5   27.77    1.01
 -12   4  -5   27.41    0.90
  -4 -12  -5   28.10    1.03
   4  12   5   28.05    0.95
  -4 -12   5   26.62    0.97
 -12   4   5   27.25    1.00
  -5 -12  -5   11.63    0.72
  12  -5  -5   11.93    0.69
   5  12  -5   11.96    0.68
 -12   5  -5   13.37    0.57
   5  12   5   11.84    0.61
 -12   5   5   12.75    0.69
  -5 -12   5   12.26    0.66
   6  12  -5    9.08    0.64
  12  -6  -5    8.56    0.64
  -6 -12  -5    9.23    0.69
 -12   6  -5    9.24    0.51
   6  12   5    9.17    0.54
 -12   6   5    8.49    0.62
  -6 -12   5    8.33    0.62
  12  -7  -5   -0.17    0.30
   7  12  -5    0.69    0.33
 -12   7  -5    0.24    0.24
  -7 -12  -5    0.01    0.34
  -7 -12   5    0.33    0.32
 -12   7   5   -0.22    0.32
   7  12   5    0.14    0.24
   8  12  -5   23.31    0.96
  -8 -12  -5   20.69    0.96
  12  -8  -5   21.87    0.93
 -12   8  -5   22.28    0.82
  -8 -12   5   20.89    0.96
 -12   8   5   21.28    0.94
   9  12  -5   -0.02    0.34
  12  -9  -5    1.40    0.38
  -9 -12  -5    0.36    0.36
 -12   9  -5    0.32    0.26
  -9 -12   5    0.15    0.37
 -12   9   5   -0.33    0.36
  10  12  -5    6.94    0.58
 -10 -12  -5    7.82    0.62
  12 -10  -5    6.56    0.57
 -12  10   5    7.37    0.59
 -10 -12   5    6.74    0.59
  12 -11  -5    8.24    0.63
  11  12  -5    6.60    0.58
 -11 -12  -5    7.76    0.65
 -12  11  -5    7.25    0.62
 -12  11   5    8.52    0.64
 -11 -12   5    8.02    0.65
 -12  12  -5    4.94    0.46
 -12 -12  -5    3.78    0.54
  12  12  -5    4.94    0.57
  12 -12  -5    4.04    0.51
 -12 -12   5    5.63    0.60
 -12  12   5    5.69    0.60
 -13 -12  -5   47.31    1.72
 -12  13  -5   48.37    1.57
  13  12  -5   49.32    1.72
  12 -13  -5   49.39    1.68
 -12  13   5   49.40    1.70
 -13 -11  -5   12.86    0.96
  11 -13  -5   14.60    0.93
  13  11  -5   15.23    0.96
 -11  13  -5   15.41    0.81
 -13 -11   5   16.56    0.99
 -11  13   5   15.77    0.97
  13  10  -5    2.71    0.49
  10 -13  -5    2.75    0.46
 -13 -10  -5    2.72    0.50
 -10  13  -5    2.61    0.38
 -10  13   5    2.77    0.47
 -13 -10   5    2.89    0.50
 -13  -9  -5   39.61    1.43
  13   9  -5   41.82    1.46
  -9  13  -5   40.11    1.32
   9 -13  -5   40.84    1.44
 -13  -9   5   41.28    1.46
  -9  13   5   41.01    1.40
   8 -13  -5   39.72    1.37
  13   8  -5   38.45    1.39
 -13  -8  -5   38.74    1.35
  -8  13  -5   38.69    1.26
  -8  13   5   37.77    1.32
 -13  -8   5   38.81    1.40
  13   7  -5    0.54    0.37
   7 -13  -5    0.92    0.39
  -7  13  -5    0.51    0.29
 -13  -7  -5    0.27    0.33
  -7  13   5    0.48    0.35
 -13  -7   5    1.14    0.36
  -6  13  -5    0.15    0.28
   6 -13  -5    0.04    0.33
  13   6  -5   -0.11    0.31
 -13  -6  -5    0.27    0.31
  -6  13   5   -0.06    0.31
 -13  -6   5    0.14    0.32
 -13  -5  -5   20.05    0.84
   5 -13  -5   19.19    0.87
  -5  13  -5   17.76    0.77
  13   5  -5   17.66    0.86
  -5  13   5   19.13    0.84
 -13  -5   5   20.65    0.91
 -13  -4  -5    5.88    0.45
   4 -13  -5    6.20    0.51
  -4  13  -5    6.39    0.54
  13   4  -5    6.38    0.52
  -4  13   5    5.70    0.46
 -13  -4   5    5.94    0.49
  -3  13  -5    8.27    0.56
  13   3  -5    7.55    0.55
 -13  -3  -5    7.84    0.55
   3 -13  -5    7.48    0.61
  -3  13   5    7.88    0.59
 -13  -3   5    7.47    0.61
  13   2  -5    1.87    0.37
  -2  13  -5    1.39    0.30
   2 -13  -5    1.12    0.33
 -13  -2  -5    1.39    0.28
 -13  -2   5    0.94    0.32
  -2  13   5    1.11    0.31
  -1  13  -5    4.76    0.41
   1 -13  -5    3.97    0.42
  13   1  -5    4.04    0.41
 -13  -1  -5    4.16    0.36
  -1  13   5    5.52    0.45
 -13  -1   5    4.40    0.42
  13   0  -5    2.14    0.37
   0  13  -5    2.01    0.34
 -13   0  -5    2.29    0.30
   0 -13  -5    1.85    0.36
 -13   0   5    2.77    0.39
   0  13   5    1.53    0.31
  13  -1  -5   65.43    1.92
  -1 -13  -5   65.47    1.93
   1  13  -5   63.40    1.89
 -13   1  -5   63.50    1.81
 -13   1   5   65.05    1.91
   1  13   5   65.88    1.88
   2  13  -5    3.49    0.39
  13  -2  -5    4.09    0.43
  -2 -13  -5    3.54    0.43
 -13   2  -5    3.87    0.33
   2  13   5    4.79    0.42
 -13   2   5    3.90    0.42
  -2 -13   5    3.94    0.38
  13  -3  -5    7.11    0.61
 -13   3  -5    6.93    0.49
   3  13  -5    6.97    0.59
  -3 -13  -5    7.15    0.55
   3  13   5    6.85    0.53
 -13   3   5    7.71    0.61
  -3 -13   5    6.42    0.51
  -4 -13  -5    0.19    0.35
   4  13  -5    0.53    0.33
  13  -4  -5    0.45    0.33
 -13   4  -5    0.81    0.24
  -4 -13   5    0.09    0.28
 -13   4   5    0.71    0.34
   4  13   5    0.27    0.26
   5  13  -5   41.20    1.36
  -5 -13  -5   38.61    1.38
 -13   5  -5   40.07    1.24
  13  -5  -5   41.53    1.36
 -13   5   5   40.38    1.36
  -5 -13   5   40.88    1.34
   5  13   5   43.37    1.30
   6  13  -5   11.77    0.74
 -13   6  -5   11.80    0.60
  -6 -13  -5   12.28    0.78
  13  -6  -5   12.54    0.75
 -13   6   5   11.95    0.75
   6  13   5   11.98    0.63
  -6 -13   5   11.98    0.71
  13  -7  -5   10.01    0.71
   7  13  -5   10.63    0.74
  -7 -13  -5    9.56    0.75
 -13   7  -5   10.70    0.60
 -13   7   5   10.45    0.72
  -7 -13   5   10.27    0.71
  -8 -13  -5    1.30    0.43
  13  -8  -5    1.37    0.39
   8  13  -5    1.72    0.41
 -13   8  -5    0.80    0.29
 -13   8   5    1.11    0.40
  -8 -13   5    1.68    0.39
  13  -9  -5   11.29    0.78
  -9 -13  -5   12.09    0.83
   9  13  -5   12.06    0.82
 -13   9  -5   12.18    0.67
  -9 -13   5   11.42    0.84
 -13   9   5   11.30    0.77
 -10 -13  -5    1.31    0.45
  10  13  -5    2.07    0.46
  13 -10  -5    1.36    0.44
 -13  10  -5    1.12    0.34
 -13  10   5    1.44    0.43
  11  13  -5    7.60    0.65
  13 -11  -5    7.46    0.61
 -11 -13  -5    7.09    0.64
 -13  11  -5    7.73    0.65
 -13  11   5    7.11    0.60
  12  13  -5    4.01    0.56
 -12 -13  -5    4.14    0.59
  13 -12  -5    4.60    0.59
 -13  12   5    3.40    0.54
  13 -13  -5    0.29    0.47
 -13  13  -5    0.54    0.38
  13  13  -5    1.18    0.47
 -13 -13  -5    1.05    0.51
 -13  13   5    0.35    0.49
 -14 -13  -5   43.29    1.64
  13 -14  -5   39.77    1.56
 -13  14  -5   41.70    1.47
  14  13  -5   40.52    1.60
 -13  14   5   44.38    1.64
 -12  14  -5    1.05    0.39
  14  12  -5    1.64    0.52
  12 -14  -5    1.13    0.46
 -14 -12  -5    0.58    0.51
 -12  14   5    2.22    0.56
 -11  14  -5   30.80    1.16
 -14 -11  -5   30.05    1.29
  14  11  -5   31.61    1.32
  11 -14  -5   28.94    1.27
 -11  14   5   29.58    1.30
 -14 -11   5   29.92    1.30
 -14 -10  -5    6.67    0.62
  14  10  -5    6.29    0.60
 -10  14  -5    6.56    0.52
  10 -14  -5    6.68    0.63
 -14 -10   5    7.64    0.68
 -10  14   5    6.14    0.59
  14   9  -5   12.47    0.87
   9 -14  -5   10.77    0.82
 -14  -9  -5   11.42    0.86
  -9  14  -5   11.61    0.73
 -14  -9   5   11.83    0.88
  -9  14   5   11.41    0.79
  -8  14  -5    2.37    0.38
   8 -14  -5    3.45    0.49
 -14  -8  -5    3.04    0.47
  14   8  -5    2.63    0.49
  -8  14   5    1.74    0.41
 -14  -8   5    2.97    0.49
 -14  -7  -5   34.56    1.24
  14   7  -5   34.43    1.27
  -7  14  -5   30.95    1.16
   7 -14  -5   32.42    1.26
  -7  14   5   33.84    1.25
 -14  -7   5   34.85    1.28
 -14  -6  -5   11.13    0.73
  -6  14  -5   11.09    0.68
   6 -14  -5   10.77    0.78
  14   6  -5   10.50    0.77
  -6  14   5   10.66    0.75
 -14  -6   5   10.72    0.77
  14   5  -5   15.95    0.86
   5 -14  -5   16.73    0.86
 -14  -5  -5   16.58    0.82
  -5  14  -5   16.28    0.76
 -14  -5   5   17.71    0.90
  -5  14   5   17.79    0.84
   4 -14  -5    0.88    0.37
  -4  14  -5    0.55    0.31
  14   4  -5    1.12    0.39
 -14  -4  -5    0.69    0.31
  -4  14   5    0.62    0.34
 -14  -4   5    0.37    0.34
  -3  14  -5    7.92    0.62
   3 -14  -5    9.19    0.67
  14   3  -5    8.47    0.70
 -14  -3  -5    8.93    0.60
  -3  14   5    9.85    0.66
 -14  -3   5    8.49    0.69
  14   2  -5    0.16    0.34
 -14  -2  -5    0.27    0.27
   2 -14  -5    0.20    0.31
  -2  14  -5    0.13    0.29
 -14  -2   5   -0.14    0.31
  -2  14   5    0.28    0.32
   1 -14  -5   -0.03    0.34
  -1  14  -5   -0.15    0.29
  14   1  -5   -0.12    0.34
 -14  -1  -5   -0.35    0.25
  -1  14   5   -0.23    0.29
 -14  -1   5    0.09    0.33
 -14   0  -5   95.82    2.63
  14   0  -5   98.45    2.72
   0 -14  -5   95.16    2.72
   0  14  -5   97.39    2.69
   0  14   5   96.55    2.68
 -14   0   5   98.23    2.72
  -1 -14  -5   -0.11    0.35
   1  14  -5   -0.18    0.30
  14  -1  -5    0.23    0.34
 -14   1  -5    0.04    0.25
 -14   1   5    0.95    0.36
   1  14   5    0.05    0.30
  14  -2  -5   55.69    1.71
  -2 -14  -5   56.66    1.73
   2  14  -5   54.99    1.70
 -14   2  -5   54.47    1.60
   2  14   5   55.06    1.65
 -14   2   5   52.93    1.70
   3  14  -5   -0.22    0.29
  14  -3  -5   -0.21    0.33
 -14   3  -5   -0.21    0.25
  -3 -14  -5    0.49    0.38
 -14   3   5    0.15    0.31
   3  14   5   -0.22    0.26
  -4 -14  -5    0.38    0.38
   4  14  -5    1.36    0.37
 -14   4  -5    1.79    0.30
  14  -4  -5    1.51    0.38
   4  14   5    1.06    0.32
 -14   4   5    1.65    0.40
 -14   5  -5   40.75    1.25
   5  14  -5   40.11    1.39
  14  -5  -5   39.81    1.37
  -5 -14  -5   39.34    1.40
 -14   5   5   39.44    1.37
   5  14   5   39.63    1.30
 -14   6  -5   14.88    0.69
  14  -6  -5   14.24    0.82
  -6 -14  -5   12.51    0.88
   6  14  -5   14.75    0.82
 -14   6   5   14.22    0.83
   7  14  -5   37.73    1.34
 -14   7  -5   35.77    1.18
  -7 -14  -5   35.93    1.36
  14  -7  -5   36.10    1.31
 -14   7   5   35.74    1.31
 -14   8  -5    0.05    0.30
   8  14  -5    0.37    0.40
  -8 -14  -5   -0.30    0.42
  14  -8  -5   -0.32    0.36
 -14   8   5   -0.29    0.38
  14  -9  -5    1.53    0.43
   9  14  -5    2.84    0.50
 -14   9  -5    2.09    0.36
  -9 -14  -5    1.59    0.51
 -14   9   5    1.91    0.45
  14 -10  -5    4.79    0.57
 -14  10  -5    4.29    0.45
 -10 -14  -5    4.37    0.59
  10  14  -5    5.58    0.58
 -14  10   5    4.09    0.53
 -11 -14  -5   14.24    1.01
 -14  11  -5   13.25    0.80
  11  14  -5   15.40    0.95
  14 -11  -5   14.93    0.94
 -14  11   5   13.26    0.94
  12  14  -5    1.38    0.50
 -12 -14  -5    0.54    0.52
 -14  12  -5    0.64    0.38
  14 -12  -5   -0.22    0.46
 -14  12   5    0.29    0.49
  14 -13  -5    4.20    0.60
 -14  13  -5    3.80    0.49
 -13 -14  -5    4.34    0.66
  13  14  -5    5.01    0.65
 -14  13   5    4.22    0.63
 -12  15  -5   27.48    1.17
  15  12  -5   26.88    1.34
  12 -15  -5   27.48    1.28
 -15 -12  -5   28.11    1.33
 -12  15   5   30.66    1.35
 -15 -11  -5    0.00    0.50
  15  11  -5    0.65    0.49
 -11  15  -5    0.23    0.38
  11 -15  -5   -0.36    0.45
  10 -15  -5    6.19    0.65
  15  10  -5    6.56    0.65
 -15 -10  -5    4.64    0.60
 -10  15  -5    5.87    0.52
 -10  15   5    6.43    0.63
 -15 -10   5    6.12    0.65
  -9  15  -5    0.68    0.37
  15   9  -5    1.16    0.46
 -15  -9  -5    1.01    0.46
   9 -15  -5    0.60    0.45
 -15  -9   5    0.80    0.45
  -9  15   5    0.11    0.39
  15   8  -5   12.09    0.92
   8 -15  -5   11.52    0.89
 -15  -8  -5   10.92    0.84
  -8  15  -5   11.51    0.77
 -15  -8   5   12.97    0.92
  -8  15   5   11.95    0.84
   7 -15  -5   21.45    1.05
 -15  -7  -5   20.90    1.01
  15   7  -5   20.81    1.04
  -7  15  -5   20.32    0.94
  -7  15   5   20.52    0.99
 -15  -7   5   21.07    1.06
   6 -15  -5   25.37    1.12
  -6  15  -5   25.60    1.02
 -15  -6  -5   26.13    1.07
  15   6  -5   23.55    1.09
 -15  -6   5   25.49    1.12
  -6  15   5   23.73    1.06
  -5  15  -5    1.75    0.38
 -15  -5  -5    1.62    0.38
   5 -15  -5    2.00    0.45
  15   5  -5    1.66    0.44
  -5  15   5    2.27    0.42
 -15  -5   5    2.21    0.45
 -15  -4  -5   39.75    1.36
  -4  15  -5   40.04    1.35
   4 -15  -5   39.93    1.43
  15   4  -5   41.13    1.43
  -4  15   5   40.70    1.39
 -15  -4   5   41.00    1.43
  -3  15  -5   23.67    0.97
  15   3  -5   22.77    1.03
 -15  -3  -5   22.43    0.94
   3 -15  -5   23.60    1.02
 -15  -3   5   22.24    1.02
  -3  15   5   24.05    1.01
   2 -15  -5    0.21    0.34
 -15  -2  -5   -0.14    0.29
  -2  15  -5   -0.19    0.32
  15   2  -5    0.10    0.36
 -15  -2   5    0.41    0.36
  -2  15   5    0.30    0.35
  15   1  -5    4.28    0.47
  -1  15  -5    3.31    0.41
   1 -15  -5    3.16    0.45
 -15  -1  -5    3.88    0.40
 -15  -1   5    3.49    0.48
  -1  15   5    4.94    0.49
   0  15  -5    6.69    0.54
  15   0  -5    4.73    0.48
   0 -15  -5    5.39    0.52
 -15   0  -5    5.17    0.43
   0  15   5    5.97    0.49
 -15   0   5    4.79    0.47
  -1 -15  -5   11.82    0.81
   1  15  -5   12.46    0.76
 -15   1  -5   12.16    0.66
  15  -1  -5   12.39    0.77
 -15   1   5   13.98    0.80
   1  15   5   11.24    0.72
   2  15  -5   -0.50    0.32
  -2 -15  -5   -0.31    0.38
  15  -2  -5   -0.61    0.35
 -15   2  -5    0.08    0.28
   2  15   5   -0.32    0.31
 -15   2   5    0.02    0.36
   3  15  -5    6.72    0.56
 -15   3  -5    7.82    0.58
  -3 -15  -5    8.30    0.64
  15  -3  -5    8.23    0.61
 -15   3   5    8.33    0.62
   3  15   5    7.50    0.61
  -4 -15  -5   10.04    0.81
 -15   4  -5    9.82    0.62
   4  15  -5   10.28    0.73
  15  -4  -5   10.24    0.77
 -15   4   5   10.00    0.76
   4  15   5    9.68    0.65
  15  -5  -5    6.42    0.58
  -5 -15  -5    6.57    0.62
   5  15  -5    6.81    0.59
 -15   5  -5    6.19    0.46
 -15   5   5    6.79    0.59
  -6 -15  -5  100.29    2.89
   6  15  -5   98.81    2.86
  15  -6  -5  100.88    2.84
 -15   6  -5   99.29    2.73
 -15   6   5   99.76    2.86
   7  15  -5    0.71    0.42
  15  -7  -5    0.27    0.39
  -7 -15  -5    0.16    0.47
 -15   7  -5    0.33    0.32
 -15   7   5    0.50    0.41
 -15   8  -5    8.61    0.65
  -8 -15  -5    6.40    0.64
  15  -8  -5    7.19    0.59
   8  15  -5    6.03    0.60
 -15   8   5    7.38    0.63
   9  15  -5    0.53    0.42
[truncated: 252,792 more chars]
